# Supplementary material for: Multi-omics molecular phenotyping of childhood acute lymphoblastic leukemia cell lines reveals novel drug vulnerabilities
Source: Research Square preprint supplement (doi:10.21203/rs.3.rs-443839/v1), 2021-04-29
Supplement: Supplementary file 1 [file 181a597ee20743c2b18c4539.xlsx]

## Sheet: Supp_Table_8
Supplementary Table 8: sDSS for the 528 drugs in the DSRT of BCP-ALL cell lines
	380	697	ALL-PO	COG-LL-319h	COG-LL-355h	COG-LL-394h	COG-LL-402h	KASUMI-10	KASUMI-2	KASUMI-7	KASUMI-9	KOPN-8	LC4-1	MHH-CALL-2	MHH-CALL-3	MHH-CALL-4	NALL-1	NALM-16	NALM-6	P30-OHKUBO	RCH-ACV	REH	SEM	SUP-B15	TMD5
1-methyl-D-tryptophan	-0.02	-0.62	-0.62	-0.62	-0.62	-0.62	-0.62	-0.62	0.38	-0.62	-0.62	1.18	-0.62	2.28	1.48	-0.62	-0.62	-0.62	-0.62	0.58	-0.62	3.68	-0.32	-0.62	-0.62
4-hydroxytamoxifen	-1.48	1.32	3.12	-4.48	1.72	2.12	-3.48	-1.78	-3.78	0.02	3.62	3.22	0.72	2.12	-2.58	0.42	-1.78	-2.88	0.02	4.12	0.72	4.02	1.62	0.92	-1.78
8-amino-adenosine	9.38	6.48	5.48	6.78	-1.42	6.58	5.78	3.28	6.08	4.88	7.08	7.48	7.78	3.28	5.38	2.18	2.08	4.48	6.68	6.18	6.68	2.88	5.08	7.28	2.68
8-chloro-adenosine	-6.3	4.1	1.6	4.3	-3.6	5.1	3.1	7.5	-1.8	6.3	2.4	5.9	2.9	2.4	-1.6	1.6	-5.3	-3.1	1.1	2.8	1.4	-0.6	7.1	7.3	-2.1
A-1155463	15.66	-2.04	0.46	21.66	27.16	16.96	26.36	10.96	5.86	3.16	-1.24	3.46	0.36	1.66	18.96	9.16	3.46	-1.24	11.26	-1.44	-1.54	-1.84	-0.24	13.56	-3.64
A-1210477	0.86	4.36	8.86	5.26	15.26	4.56	4.26	3.86	-0.74	4.46	5.66	10.06	6.56	7.86	2.56	5.06	5.46	4.36	4.26	4.46	4.66	8.46	4.96	8.16	4.26
A-1331852	3.94	-1.76	-1.86	19.44	18.24	7.94	16.54	3.04	1.04	-0.66	-2.26	0.74	-2.26	-1.26	9.54	2.24	0.14	-2.26	5.84	-2.26	-1.76	-2.26	-1.66	9.34	-2.26
A-366	-1.84	-1.34	1.76	3.16	0.76	2.06	-1.84	1.46	-1.84	3.06	2.36	-0.64	-1.24	-1.14	-1.84	-0.34	-1.84	-1.84	-1.84	2.56	0.06	0.36	0.46	-1.14	-1.84
A-419259	-0.68	3.32	9.52	2.42	-0.08	4.42	18.22	8.52	-1.38	4.82	6.52	5.02	-1.78	3.12	6.92	0.52	5.52	0.72	3.42	8.52	22.72	4.12	9.62	16.12	10.22
ABC294640	0.38	3.78	3.28	-0.62	0.48	2.88	0.08	0.98	-0.42	-0.12	4.28	4.48	0.18	4.38	2.78	2.78	3.58	-0.72	-0.22	3.18	4.08	5.18	3.88	0.18	0.68
Abemaciclib	-6.86	8.44	-3.36	6.64	6.44	-3.26	1.74	-1.06	1.74	6.24	5.44	20.24	2.94	-3.96	1.24	-1.76	-5.96	-6.46	-4.46	5.94	8.74	-0.06	-1.86	6.74	-9.66
Abexinostat	7.56	6.96	6.76	8.36	3.36	3.86	13.36	6.06	8.66	6.66	8.26	9.26	4.36	9.06	15.36	6.36	1.06	0.56	2.76	5.56	10.56	2.26	5.46	6.26	5.36
Abiraterone	0.58	-0.12	3.48	0.08	-0.12	-0.12	-0.12	-0.12	-0.12	-0.12	-0.12	1.78	1.18	0.88	-0.12	0.28	3.08	-0.12	-0.12	1.48	-0.02	-0.12	-0.12	-0.02	-0.12
ABT-751	8.72	12.82	13.32	10.72	1.02	3.72	8.92	8.12	4.72	12.12	10.42	14.62	11.72	12.62	3.72	3.52	10.82	11.52	10.72	11.62	11.72	15.42	14.72	10.82	7.32
Acalabrutinib	9.6	0.8	-0.1	0	-0.1	-0.1	-0.1	1.8	-0.1	-0.1	1.2	-0.1	-0.1	9	0	7.4	-0.1	-0.1	-0.1	1.3	1.8	-0.1	3.2	3.7	5.9
Acitretin	15.2	0.6	-0.3	-1.6	2.3	-1.6	-0.1	-1.6	-1.6	-1.6	2.9	1.8	-0.9	-0.7	-0.2	-1.6	-1.6	-1.6	-1.5	-1.6	-1.6	-1.6	0.4	-1.6	-1.6
Afatinib	-0.84	-0.34	-0.64	-0.84	0.46	-0.84	0.46	-0.84	-0.84	-0.84	2.16	-0.74	-0.84	0.16	3.96	-0.84	-0.84	-0.84	-0.84	1.56	1.26	5.46	0.96	-0.84	3.56
Afuresertib	2.46	0.76	4.26	7.76	2.76	-0.94	4.56	-2.34	10.16	-2.34	1.86	6.06	0.86	7.36	-1.94	5.06	-2.34	1.46	4.66	5.56	5.36	3.56	0.36	5.66	-2.34
Agerafenib (CEP-32496)	0	10.4	11.5	12.3	4.9	3.9	0.3	10.8	5.2	7.2	7.5	16.7	1.1	4.2	0	3.4	0.3	0	0	3.2	13.9	5	14.5	28.4	15.7
Aldoxorubicin	13.24	10.24	-2.06	14.04	4.44	8.24	14.34	9.24	8.54	10.14	8.64	14.24	6.34	9.84	14.14	8.14	-1.86	-0.46	4.34	7.34	11.74	12.14	3.64	12.54	0.34
Alectinib	0.38	2.48	7.28	2.48	-0.02	2.58	1.48	1.68	1.08	-0.22	0.88	1.38	3.18	-0.12	-0.22	-0.12	-0.22	-0.22	1.28	1.68	4.98	-0.02	0.58	-0.22	-0.22
Alisertib	26.38	24.98	15.58	23.28	7.98	2.28	16.08	14.58	18.48	22.38	24.98	21.28	25.48	14.88	11.98	-5.62	16.18	0.28	20.08	25.38	24.28	14.38	26.78	23.98	10.98
Allopurinol	-0.64	-0.64	-0.64	3.56	-0.64	-0.64	-0.64	-0.64	-0.64	-0.64	-0.64	-0.64	0.06	-0.64	-0.64	-0.64	-0.64	-0.64	-0.04	0.96	-0.64	-0.64	-0.54	0.36	-0.64
Alpelisib	3.18	1.08	3.28	12.48	5.98	0.78	4.18	-0.12	1.98	6.08	1.18	5.38	0.98	1.68	-0.82	-0.22	-0.82	1.38	3.88	2.78	8.98	-0.12	-0.82	-0.82	-0.82
Altiratinib	-0.86	4.24	8.94	2.84	-0.36	1.84	-2.16	8.84	-0.66	3.74	-0.16	3.74	-0.36	3.74	-4.86	2.84	4.14	-2.56	1.34	1.84	7.24	3.84	13.74	6.64	3.24
Alvocidib	-4.3	1.3	-6.7	-2.7	-0.1	-2.5	-2.1	-2.9	-2.8	1.3	-0.7	-1.2	-3.3	-3.5	-3.6	-3.8	-7.1	-3.6	-1.2	1.1	2.7	-2	-3.5	0.1	-5.7
Amcasertib	7.8	2.4	6.7	-0.1	6.8	1.3	-3.2	5.2	0.8	-1.8	-0.2	-1.1	0.9	4.9	-3.2	2.2	5.2	-2.1	0	3.9	3.3	3.6	3	0.5	-1.7
AMG-232	12.96	9.06	-6.94	11.36	8.76	8.76	9.26	10.06	12.26	11.86	13.06	10.36	11.26	11.66	12.56	10.86	-8.14	-10.24	7.96	8.96	12.06	8.36	-8.34	16.46	6.76
AMG319	-1.02	0.18	-1.42	10.08	4.58	-1.42	5.88	-1.42	7.58	4.68	1.18	6.38	-1.42	-1.42	-0.42	0.68	-1.42	-1.42	3.68	4.08	19.28	-1.02	-1.42	0.48	-1.42
AMG-337	3.04	-0.06	-0.06	-0.06	-0.06	-0.06	-0.06	-0.06	2.14	-0.06	0.14	1.54	-0.06	7.54	4.94	-0.06	2.14	-0.06	-0.06	0.84	-0.06	1.24	-0.06	-0.06	-0.06
AMG-925	2.44	11.44	11.44	6.44	2.34	-0.66	6.14	9.54	-0.66	12.14	8.24	10.94	9.24	4.94	4.94	3.54	-0.16	6.34	4.74	8.14	14.74	3.44	10.04	11.74	-0.66
Aminoglutethimide	0	0	0	0	0.6	0	0	0	0	0	0.6	0	0	2.4	0	0.5	0	0	0	0	0	0.6	0.3	0	0
Amsacrine	23.16	20.56	5.66	18.16	10.96	8.26	16.76	10.96	21.66	19.46	15.96	18.26	15.46	10.46	23.46	13.16	5.66	0.66	10.66	12.96	24.66	19.06	12.76	23.56	3.86
Amuvatinib	3.76	7.86	1.16	5.96	2.06	7.36	2.36	-1.44	10.76	7.26	1.26	8.76	4.56	3.66	5.06	2.16	2.16	0.86	3.86	4.26	9.26	5.56	2.26	5.46	4.16
Anagrelide	0.1	0	1	0	4.6	0	0	0	0	0	0	3.4	0	1.5	0	0.6	1.1	0	0	0	0	0	0	0	0
Anastrozole	0	0	0	0	0	0	0	0	0	0	0	0	0	0	0	0	0	0	0	0	0	0	0	0	0.6
Apalutamide	0	0	0	0	0	0	0.2	0	0	0.2	0	0	0	0	0	0	0	0	0	0	0	0	0	0	0
Apatinib	0	0	2.4	0.6	0	0	0	0	2.1	0	0	0.1	1.2	1.2	0	0	0	0	0.4	0	1.1	0.1	1	0.1	0
APR-246	4.54	0.24	-1.16	7.44	2.44	-1.16	-1.16	-1.16	-1.16	7.44	-0.66	0.54	0.74	6.84	0.14	0.64	-1.16	2.44	1.14	-0.76	-1.16	-1.16	-1.16	0.44	-1.16
AR-42	10.08	9.58	10.68	10.78	6.68	2.08	10.78	6.88	15.98	9.88	8.08	10.58	6.88	10.98	14.28	8.08	3.68	1.68	4.48	5.18	13.88	5.38	9.08	9.58	5.28
Arsenic(III)_oxide	-0.22	-0.42	-0.42	-0.42	-0.42	-0.42	-0.42	-0.42	1.38	-0.42	2.78	0.08	-0.42	1.48	0.28	-0.42	-0.42	-0.42	-0.42	3.78	-0.42	-0.42	-0.42	-0.42	-0.42
ARV-825	2.04	3.14	2.34	4.04	10.24	-0.96	3.74	3.84	-4.46	6.44	6.64	4.14	3.64	4.94	7.44	7.54	-12.06	0.74	1.24	3.74	4.44	-0.26	2.24	6.14	0.14
Asciminib	1.92	-1.18	-0.28	10.02	2.02	4.52	-1.98	-1.98	-1.98	8.12	-1.68	11.42	-1.98	-1.98	-0.98	7.12	3.62	-1.98	0.42	-0.58	-1.98	-1.98	5.72	26.22	13.62
ASP3026	-2.74	-0.84	5.36	-4.04	1.36	2.36	1.76	2.86	-4.04	1.76	-0.84	-2.64	-0.44	-0.84	-4.04	-3.94	-2.64	-2.64	1.86	-1.04	-0.74	3.26	1.66	1.16	-1.84
AT-101	-0.22	3.08	8.98	4.48	4.98	3.78	4.18	2.48	-0.32	7.68	6.48	14.58	9.28	4.18	-0.92	3.98	4.58	0.98	6.38	5.18	0.98	5.28	3.78	5.78	0.18
AT13148	13.88	9.78	3.98	1.48	3.28	-1.22	5.78	-1.22	2.78	-1.12	3.78	3.38	1.28	2.58	5.78	1.78	-1.22	-1.22	1.28	3.68	7.58	2.88	6.58	6.78	4.98
AT-406	-1.26	-1.26	-1.26	-1.06	8.04	5.84	-0.86	-1.26	0.34	-1.26	-1.26	-1.26	-1.26	2.14	-1.26	-1.26	5.34	-1.26	-1.26	-1.06	0.84	5.74	-1.26	-1.26	6.54
AT7519	-4.86	-2.46	-14.36	-4.26	2.74	-1.06	-3.66	-2.76	-4.46	-3.96	-3.66	-5.06	-4.26	-2.06	-4.56	-1.26	-8.16	-8.16	-2.76	-2.96	-3.16	-2.16	-4.76	-4.56	-4.16
AT9283	11.32	12.12	6.32	11.32	6.22	1.02	7.72	8.42	6.22	12.62	10.72	10.32	12.42	3.42	10.42	4.92	9.02	-0.68	6.82	16.02	6.02	11.62	14.72	12.62	7.32
Atorvastatin	-3	-2.4	1.1	-1	4.2	-1.2	-1.8	-1.8	-3.7	-1.8	-3.7	6.6	4.9	0	-3.7	0.1	0.1	-3.7	1.4	-2.2	-1	1	0.4	0.8	-1.6
Auranofin	12.34	1.94	0.34	8.24	6.34	0.14	7.84	5.54	0.54	10.64	3.94	11.64	6.34	8.14	4.04	7.34	3.14	-0.56	5.34	4.84	3.84	6.04	1.34	12.64	3.84
Avadomide (CC122)	0	2.7	0	0	2.6	0	0.2	2.3	0	5.1	10.7	1.3	3.5	0	0	3.9	0	0	0	5.9	10.5	3.6	0.9	0	3.5
AVN944	18.44	17.54	5.94	12.34	-2.16	-2.06	9.64	10.14	14.44	20.54	13.54	19.54	5.34	9.54	11.14	2.44	2.64	0.24	15.54	13.84	22.04	16.84	7.04	14.64	2.74
Axitinib	1.56	14.66	9.16	7.96	-0.74	2.96	5.86	1.86	6.56	13.86	8.36	6.06	11.76	-0.34	-2.44	-2.44	5.56	-2.34	7.86	12.16	11.06	9.36	13.06	16.36	6.76
AZ191	-2.42	1.08	3.58	-2.92	-0.02	-0.72	-0.22	5.38	-5.12	-4.52	1.58	2.18	-2.72	3.88	-2.72	1.98	2.88	-3.72	-1.72	-0.72	2.38	0.48	5.58	-2.72	-4.32
AZ3146	-2.86	1.04	3.44	7.04	2.94	1.04	-0.56	3.64	-4.16	4.44	-0.36	4.54	3.14	1.94	-4.16	0.64	-2.16	-2.56	3.04	-0.06	1.24	1.14	2.04	1.34	-4.06
Azacitidine	5.44	10.94	6.94	7.84	5.14	-2.26	1.74	3.64	-0.36	4.34	5.14	8.74	6.04	5.84	4.24	6.14	4.14	1.84	3.34	6.54	5.24	9.44	8.74	11.64	-2.26
AZD0156	2.24	1.04	2.24	3.84	0.74	-0.06	3.34	-0.06	2.84	1.14	1.04	2.04	1.04	1.84	-0.06	1.54	2.54	-0.06	-0.06	2.04	7.24	0.84	1.14	1.14	-0.06
AZD-1080	-0.02	4.38	2.18	6.28	3.98	-0.02	2.08	1.88	3.48	0.88	4.08	4.28	3.28	-0.02	5.18	-0.02	-0.02	0.48	1.78	1.78	3.98	8.28	4.58	5.08	-0.02
AZD1152-HQPA	20.84	16.54	7.64	24.24	8.84	3.24	18.44	16.04	6.44	21.64	17.14	12.14	23.24	6.64	5.24	2.04	9.54	0.34	8.94	24.74	14.04	17.24	15.74	22.24	9.14
AZD1208	14.8	1.2	8.5	-4.4	12.4	1	-4.4	-4.4	-4.4	-3.3	-1.7	7.4	-3.8	3.7	-4.4	3.9	2.4	-3.2	-4.4	-1.1	0.6	5.5	-4.4	-4.4	3.1
AZD1480	-0.58	-3.78	0.72	-1.68	0.42	-4.18	-3.98	-0.48	-4.28	-2.88	-0.68	-4.28	-4.08	-1.38	-1.28	-0.78	-1.48	-4.28	-3.58	-4.18	-2.18	-4.08	-1.98	0.02	-1.98
AZD1775	10.84	15.44	7.04	18.84	7.24	5.54	10.24	7.84	4.94	13.94	14.64	14.14	13.74	10.54	5.64	1.94	4.84	6.64	11.04	13.74	17.24	13.54	14.14	14.74	4.94
AZD3759	-0.04	-0.04	1.26	0.96	-0.04	-0.04	-0.04	-0.04	-0.04	-0.04	-0.04	-0.04	-0.04	1.56	-0.04	-0.04	0.86	-0.04	-0.04	-0.04	-0.04	0.66	-0.04	-0.04	0.06
AZD3965	4.2	3.6	3.8	0	0	0	0	0	3.8	0	2.7	0	1.5	1.4	0	0	3.8	0	11.1	1.8	0	3.6	0	7.1	2.6
AZD4547	-0.14	-0.04	0.46	-0.04	-0.14	0.16	-0.14	1.36	0.26	-0.14	-0.14	-0.14	0.66	-0.14	-0.14	-0.14	-0.14	0.56	-0.14	-0.14	3.46	-0.14	0.36	-0.14	-0.14
AZD-5363	8.82	5.32	5.82	4.72	5.92	-1.08	5.62	1.62	7.32	0.82	3.52	6.72	1.22	7.82	6.72	5.52	4.72	0.12	7.12	5.22	10.92	11.32	4.82	0.42	6.62
AZD-5438	-7.56	0.94	-6.06	8.54	3.94	-5.86	-0.46	6.04	-0.86	-0.46	-0.26	5.24	0.44	-1.06	6.64	-6.86	-6.86	-6.16	1.44	0.84	2.44	1.54	2.34	9.74	-5.96
AZD-6482	4.72	3.12	3.92	13.62	6.92	-0.28	6.52	-0.28	10.22	4.82	5.82	8.22	3.42	2.82	0.42	1.92	7.42	0.42	5.62	9.12	17.62	7.82	1.92	2.22	-0.28
AZD6738	19.48	10.98	4.58	15.58	6.18	-2.72	7.68	8.08	1.38	11.48	8.38	15.48	8.48	13.18	12.18	5.48	7.68	0.68	7.28	5.78	15.88	13.08	17.18	9.68	5.88
AZD7545	-0.2	4.3	2.6	0.8	-0.2	4.1	-0.2	-0.2	5.3	0.5	-0.2	3.1	1.6	-0.2	0.1	-0.2	-0.2	0.3	3.7	0.6	3	4.4	0.6	4.9	-0.2
AZD7762	1	2.6	9.2	2.8	-0.1	-3.5	3.3	12.9	-4.2	3.7	4.1	3.4	-0.5	5.1	1.9	0.3	-2.1	0.5	0.6	3.3	7.9	-1.1	19	-0.4	-1.1
AZD8055	15.78	16.78	10.58	5.28	6.38	-2.42	9.88	0.48	14.58	9.68	13.28	22.58	6.38	6.08	-0.52	2.88	-3.22	1.78	3.68	16.58	27.38	12.78	6.18	11.88	-1.62
AZD-8186	2.84	3.64	0.34	0.74	5.04	-0.26	5.14	-0.26	7.54	0.74	6.04	3.44	-0.26	4.64	3.84	4.34	2.34	-0.06	5.14	7.24	14.94	9.54	2.44	-0.26	-0.26
Bafetinib	0	0	0	1.9	0.8	3	0.5	0	0.3	2	0	3.1	0.4	0	0	0	0	0	0	0	0.4	0.2	0	21.9	9.1
Baricitinib	-1.94	-1.94	-1.94	-1.94	-1.94	-1.94	-1.94	-1.94	-1.94	-1.74	-1.94	-1.94	-1.94	-1.94	-1.94	-1.24	-1.94	-1.94	-1.94	-1.94	-1.94	-1.94	-1.94	-1.94	-1.94
BAY_87-2243	-8.66	18.74	5.54	2.54	10.84	23.54	-3.16	-6.66	-8.66	8.54	5.24	6.34	3.84	8.64	-6.36	11.94	0.04	4.24	10.04	6.44	14.44	17.14	6.84	14.14	-1.16
BAY-1436032	-0.14	-0.14	2.86	-0.14	2.16	-0.14	-0.14	-0.14	-0.14	3.76	0.66	0.06	0.76	0.96	-0.14	-0.14	-0.14	-0.14	0.16	-0.14	-0.14	0.36	0.16	2.16	-0.14
BCI	5.58	-0.22	-2.22	3.88	3.68	-0.82	6.38	3.18	-3.62	4.58	4.68	6.98	2.68	1.98	6.08	1.08	1.58	-0.32	2.18	3.08	2.18	1.68	2.28	-2.32	-0.02
Belinostat	16.2	10.1	11.4	11.8	10.2	2.1	12.6	7.6	17.4	10.4	8.9	17.8	9.7	11	17.5	7.5	2.4	2.5	7.4	8	14.3	5.1	7.6	8.5	6.3
Bentamapimod	-0.46	5.14	6.24	-0.06	1.84	3.44	1.54	-0.46	-0.46	0.94	6.24	5.64	2.34	4.94	-0.46	-0.46	1.14	-0.46	2.44	5.34	4.44	6.54	3.24	2.34	0.74
Bexarotene	24	-2.7	3.7	-5.3	-5.1	-5.3	-5.3	-1.9	-5.3	-2.1	-3.4	8	0.2	3.5	10.2	3.3	-4.5	-4.1	-3.4	-5.3	-5.1	-3.8	2.9	-4.8	0.1
BGB324	-0.88	3.52	6.02	0.22	3.82	2.82	2.32	0.32	-1.58	-0.38	5.22	0.02	1.52	-1.58	-0.98	-2.88	-2.68	-1.58	1.92	5.82	5.02	0.92	5.72	3.02	-2.98
BI-2536	18.34	17.44	15.94	23.64	4.84	9.44	17.24	11.94	14.14	21.34	20.34	17.04	20.14	16.24	7.94	6.94	-8.46	14.54	13.44	18.34	15.54	16.44	20.74	22.94	10.44
Bicalutamide	1.72	-0.68	3.92	3.72	2.62	-0.18	-1.68	-1.68	-1.68	3.72	0.52	4.92	-1.68	-1.68	-1.68	-1.68	-1.68	0.62	2.02	-1.68	-1.68	-1.68	-1.68	4.62	-0.88
BIIB021	7.68	4.28	5.88	1.78	0.38	-4.02	5.78	8.78	3.88	10.28	-1.22	11.98	0.98	2.48	9.58	1.28	1.08	2.38	7.88	3.38	9.58	5.68	7.38	4.48	1.58
Bimatoprost	0	0	0	0	0	0	0	0	2.5	0	0	0	0	0	0	0.5	0	0	0	0	0	1.4	0	0	0
Binimetinib	1.58	-1.62	3.08	2.98	5.58	0.48	3.88	0.28	-2.22	11.78	-0.92	10.28	2.18	5.28	7.18	4.98	-2.22	-0.12	5.78	-2.22	-2.22	4.48	-2.22	11.18	2.38
Birabresib	-9.68	10.62	5.22	13.52	2.42	-0.08	7.12	7.02	-9.68	13.82	13.12	11.62	4.92	7.02	14.02	6.02	-3.58	1.52	3.72	7.22	12.02	-3.18	11.62	3.42	-9.18
Birinapant	-5.1	-5.1	-1.9	14.5	13.3	16.2	-5.1	-4.9	7.8	1.9	-5.1	-5.1	-5.1	8.7	-5.1	7.5	6.9	0.5	-4.2	-0.1	3.1	1.1	-5.1	-3.7	-0.1
Bleomycin	4.34	4.74	-1.76	7.84	4.14	2.24	2.84	1.14	6.44	3.04	6.24	7.34	0.54	3.14	4.14	4.54	-1.56	-1.86	5.74	4.44	7.54	9.44	11.14	6.44	7.34
BMS-754807	18.08	11.78	12.98	8.78	12.08	5.98	8.18	4.68	-6.52	9.48	8.08	4.68	11.38	11.68	3.28	4.58	8.98	2.88	4.08	11.18	6.08	9.08	8.98	8.98	-0.12
BMS-777607	0	0.4	2.7	0	0	0.8	0	2.6	0	2.2	0	0	0	0	0	0	0	1	2	1.5	1	1.3	4.9	3.5	0
BMS863233	13.1	6.2	-0.2	2	2.1	0.5	-1.5	-2.7	7.2	-0.9	-1	8.1	1.8	1	-0.7	-1.2	0.8	-1.9	-0.4	1.2	5.1	0.3	-1.6	1.8	-2.8
BMS-911543	-4.36	-3.76	8.14	-4.36	1.14	-4.36	-4.36	-0.66	-4.36	-4.36	0.04	-4.36	-4.36	3.44	-4.36	-1.56	0.44	-4.36	-4.36	-3.66	-3.06	-4.36	0.94	-4.36	-4.36
Bortezomib	1.42	2.62	4.82	4.02	5.92	2.42	1.32	2.92	1.42	4.02	3.22	3.42	3.32	3.82	2.72	3.92	2.52	2.32	1.82	4.72	3.42	4.92	12.92	8.42	2.32
Bosutinib	-0.64	5.86	0.36	1.66	1.86	1.16	5.66	-1.14	-2.04	1.16	4.06	4.56	0.96	7.66	8.06	-3.14	-0.94	-3.04	-1.24	3.56	5.76	-1.94	1.96	15.96	9.06
BRD7116	-0.24	0.56	-0.24	1.26	-0.24	3.16	-0.24	0.86	-0.24	-0.24	4.46	-0.24	1.76	0.16	-0.24	-0.24	-0.24	1.06	1.96	4.46	-0.14	2.86	-0.24	-0.14	0.66
Brigatinib	-3.34	-1.84	4.16	3.26	2.86	-1.84	-2.04	4.76	-3.24	1.96	3.56	-3.34	-0.94	7.66	-3.34	-3.34	-3.34	-3.14	0.26	-3.34	8.86	-3.34	4.06	-3.34	-2.04
Brivanib	-0.04	0.66	-0.04	-0.04	-0.04	-0.04	-0.04	-0.04	-0.04	1.06	-0.04	0.16	-0.04	-0.04	-0.04	-0.04	-0.04	-0.04	-0.04	-0.04	1.96	0.96	-0.04	-0.04	-0.04
Bryostatin_1	-7.12	11.98	-7.12	-7.12	-7.12	-5.92	-5.72	6.78	-7.12	23.98	25.08	26.88	30.58	8.68	-7.12	-7.12	-7.12	-6.92	-7.12	20.18	-7.12	-7.12	-7.12	15.58	-7.12
Buparlisib	7.18	7.38	9.58	4.58	5.68	0.38	5.58	2.48	2.08	7.28	6.58	7.28	6.08	5.28	-1.22	2.78	1.28	3.98	4.78	7.28	13.28	5.18	7.08	4.38	-1.82
BX-912	8.26	10.36	13.96	12.66	1.36	-2.24	6.16	12.76	5.86	13.36	10.46	12.36	12.26	2.86	3.06	3.06	7.36	-0.14	6.46	10.86	13.26	7.96	13.36	11.86	2.06
C646	-0.86	2.34	5.04	11.74	4.44	-0.66	-0.16	-0.36	15.14	6.54	4.74	2.44	1.84	-2.06	4.64	-2.06	-2.06	-2.06	-2.06	3.94	1.94	4.44	-0.26	5.04	-2.06
Cabazitaxel	25.68	23.68	15.08	16.88	2.58	6.08	17.08	12.38	17.48	17.78	18.68	17.88	22.38	15.88	6.78	3.58	11.38	11.38	15.88	20.28	22.88	17.88	19.48	21.88	2.88
Cabozantinib	-3.62	-1.42	10.38	-2.22	2.18	0.18	-3.62	14.08	-3.62	-1.22	-3.62	24.88	-3.02	-3.62	-3.62	3.78	-3.62	2.68	-2.82	-3.62	-3.62	4.58	17.58	13.48	-3.62
Canertinib	3.16	1.66	2.86	3.36	5.96	1.56	4.86	4.66	1.86	2.76	3.76	4.36	2.76	3.16	12.56	1.66	-0.94	-0.14	-1.34	2.26	1.26	0.26	2.56	3.16	4.96
Capecitabine	-0.06	-0.06	-0.06	-0.06	-0.06	-0.06	-0.06	-0.06	-0.06	-0.06	-0.06	-0.06	-0.06	1.04	-0.06	0.04	-0.06	-0.06	-0.06	-0.06	-0.06	-0.06	0.04	-0.06	-0.06
Capmatinib	2.04	-0.06	-0.06	14.94	0.04	-0.06	0.74	-0.06	-0.06	5.54	-0.06	-0.06	0.64	-0.06	-0.06	-0.06	-0.06	-0.06	0.24	-0.06	-0.06	-0.06	-0.06	-0.06	-0.06
Carboplatin	11.7	12.4	3	13.9	4.3	2.2	8.7	8.7	9.1	12	7.7	14.4	10.7	12.7	11.7	8.9	4	3.5	4	10	11.6	9.4	5.3	8.6	2.1
Carfilzomib	0.06	0.66	4.76	2.56	5.06	0.26	2.86	0.36	-0.04	1.26	1.76	1.46	2.36	1.56	2.86	1.56	0.56	-3.64	1.06	3.46	0.86	3.16	8.56	4.56	0.16
CC-115	10.64	4.14	4.34	11.74	1.44	-2.06	3.44	0.14	5.74	11.94	4.54	17.54	4.54	8.34	1.34	7.34	4.24	1.34	1.24	2.94	17.54	0.44	0.04	2.34	-1.66
CC-223	13.02	5.02	0.22	5.12	1.12	-2.28	2.92	-1.38	7.92	5.32	5.12	8.12	0.42	6.42	8.82	1.52	5.52	0.72	1.42	3.12	9.62	4.22	0.72	-1.38	6.12
CCT196969	-4.68	4.72	5.72	-1.08	1.92	0.82	-1.78	5.62	-1.38	0.32	-1.18	2.22	-1.48	-1.48	-3.58	0.42	-0.38	-2.78	-0.98	-0.08	3.82	-0.78	11.42	10.62	2.32
Cediranib	0	0.9	0	0	0	0	0	0	0	0	3.6	0	0	7.2	0	0	0	0	0	2.7	0	0	0.2	0	3.6
Celecoxib	7.74	-0.06	2.84	0.04	-0.06	-0.06	-0.06	-0.06	7.54	0.24	-0.06	0.74	1.24	0.34	5.24	-0.06	-0.06	-0.06	-0.06	-0.06	0.64	-0.06	-0.06	2.44	1.34
CEP-37440	2.06	2.86	5.76	8.86	6.96	3.16	-0.84	5.66	-3.24	0.66	0.26	0.76	2.96	1.66	-1.94	-0.94	-3.34	-2.44	-1.04	6.36	0.46	-2.24	3.06	3.96	-2.74
Cerdulatinib	-11.86	-3.66	6.04	2.14	-7.46	-8.56	-2.56	0.24	-11.86	-0.16	-1.36	3.14	-9.46	-8.26	-11.86	-5.46	-8.76	-11.36	1.44	3.44	13.34	-5.16	2.54	0.04	-4.46
Ceritinib	0.36	-2.24	-0.94	6.66	2.86	5.16	2.86	0.36	-3.44	1.26	-2.04	-3.44	3.06	-0.04	-3.44	-0.74	-2.14	-3.44	-0.74	-2.44	-2.04	-2.84	-3.44	-3.44	-3.44
Chloroquine	-4.94	-2.14	-1.64	-5.84	-0.34	-4.54	-3.94	-4.24	-8.14	-5.04	-1.94	-1.14	-3.74	1.06	-6.04	-1.44	-8.84	-5.24	-2.74	0.26	-0.14	0.96	-0.74	-4.14	-4.54
Cilengitide	11.3	0	0	0	0	0	0	0	0	0	0	13.8	0	7.1	0	5.5	11.8	0	0	4.2	0	0	0	0	7.5
Cisplatin	7.54	19.74	8.44	19.44	5.84	0.54	1.54	12.04	17.24	14.74	12.34	21.74	17.74	14.64	4.04	10.74	6.84	-0.86	0.64	16.74	20.54	10.84	12.24	17.44	1.24
Cladribine	7.56	10.46	8.66	7.76	0.16	-16.04	3.66	5.26	6.76	3.76	7.76	9.66	6.26	4.66	11.66	4.06	1.86	-8.24	0.46	8.06	5.76	-2.64	3.96	9.36	-16.04
Clofarabine	13.4	9.6	1.2	5.6	3	-27.4	8.1	1	8.3	3.2	7.3	6.7	9.2	9.2	10.9	6.5	1.8	-5.6	2.1	10.3	6.8	2.3	7	10.5	-26.5
Clomifene	1.42	0.92	0.62	-0.48	0.52	-0.08	-0.88	-1.78	0.82	-1.78	1.72	8.92	4.62	4.12	6.52	2.72	1.22	-2.88	-0.28	3.22	3.22	0.72	2.32	0.12	1.32
Cobimetinib	0.82	-2.58	0.92	-1.28	5.02	-2.48	-0.98	-3.68	4.22	0.92	-2.38	2.12	-0.68	0.42	6.22	2.62	-1.88	-1.38	2.62	-3.68	-3.68	-3.68	-2.48	6.62	1.32
Copanlisib	14.38	3.48	8.28	3.18	12.18	-0.82	8.88	-1.32	4.18	1.18	5.98	4.98	-4.22	6.18	-0.62	9.28	-0.62	2.58	8.18	10.08	22.18	8.28	4.18	-2.12	-5.32
CPI-0610	1.7	7.1	7.9	10.3	10.3	0.5	4.9	4.6	-5.8	9.7	8.4	11.1	3.6	-3	17.9	-4.1	-4.4	1.4	5.6	6.1	10.9	-1.2	7.5	5.7	0
CPI-360	5.1	0	0	0	0	0	0	0	0	0	0	0	0	1.1	0	0	0	0	0	1.8	0	0	0	0	0
Crenolanib	2.08	3.28	7.78	-3.92	0.48	-3.62	0.68	12.88	-5.22	-2.62	-0.02	0.68	-3.92	3.28	-5.32	0.68	1.58	-7.62	-4.02	-2.72	-1.12	-4.32	13.88	0.88	-0.02
Crizotinib	-0.54	-0.24	1.46	-0.54	2.16	0.86	-0.54	-0.54	-0.54	-0.54	-0.54	-0.54	-0.54	-0.54	-0.54	-0.54	-0.54	-0.54	0.96	-0.54	-0.54	-0.54	-0.54	3.86	1.66
CUDC-305	3.22	2.92	7.52	-2.48	2.42	-1.28	3.92	3.52	-0.28	4.22	0.22	4.32	-0.98	1.02	-11.68	0.92	0.42	1.12	4.72	1.72	4.02	3.32	5.12	3.22	1.82
Cytarabine	22.2	27.7	8.6	18.8	4.9	-10	26.9	1.6	16.6	18.1	22.7	20.9	21	19.6	15.8	5.4	10.6	8.8	25.2	26.2	28.1	21.8	15.9	27.7	-10
Cytarabine.Idarubicin	19.16	23.06	5.36	18.96	5.06	1.16	21.16	3.66	12.46	18.36	18.46	17.06	14.76	11.66	15.16	7.86	5.96	5.36	17.76	19.26	23.26	15.76	11.26	22.06	-5.74
Dabrafenib	-1.52	11.48	-0.22	-0.92	0.38	-0.22	0.48	0.58	-1.52	4.98	3.58	8.48	6.48	9.18	-1.52	3.08	-1.42	-1.52	-0.52	5.18	0.88	-1.52	-1.52	1.88	1.18
Dacomitinib	-1.64	-0.34	3.06	-1.24	1.06	-1.64	0.96	-0.54	-1.64	-1.64	0.96	-0.34	-0.94	2.06	2.06	1.86	-1.64	-1.54	-1.64	0.96	0.16	-1.04	0.86	-1.34	1.46
Dactinomycin	17.24	19.24	8.24	5.94	8.54	12.24	15.24	17.64	15.04	5.74	19.44	17.84	17.54	12.44	15.74	11.64	1.44	5.24	12.54	19.14	18.54	16.34	11.34	20.74	7.84
Dactolisib	17.46	15.76	4.56	-7.44	3.46	-3.94	5.36	-1.04	9.06	10.76	10.26	15.06	5.16	9.36	3.26	4.06	3.46	0.86	6.36	14.76	21.26	12.86	10.36	10.26	4.46
Danusertib	22.44	21.44	13.04	19.04	3.04	2.64	11.54	13.84	9.14	20.44	15.54	19.04	19.94	11.74	13.84	7.14	13.54	-0.96	12.54	20.04	17.94	16.54	19.24	18.64	14.54
Daporinad	14.66	16.26	13.76	9.76	10.96	-4.44	16.36	12.06	8.66	9.86	16.16	19.76	14.16	11.36	14.56	7.66	15.86	2.96	15.56	15.96	19.46	15.46	17.16	19.36	4.46
Darapladib	-1.42	-1.42	-1.42	-1.42	-1.42	-1.42	-1.42	-1.22	0.98	-1.42	-1.32	7.18	-1.42	3.68	-1.42	2.68	6.18	-0.52	-1.42	0.68	7.28	-1.42	-1.42	-1.42	6.98
Dasatinib	-2.8	3.1	-0.2	9.2	-2.8	0.3	16.8	-2.8	-2.8	5.3	3.1	0.4	-2.8	-2.8	-2.8	-2.8	-2.8	-2.8	3.3	6.1	21.5	-2.8	-2.4	30.2	10.4
Daunorubicin	13.66	9.06	-0.34	16.36	5.06	8.66	15.76	9.06	10.76	9.36	7.06	6.56	6.36	6.16	16.36	7.46	-4.04	-2.14	6.36	6.46	12.56	6.16	6.06	11.86	1.86
dBET1	-4.58	-0.38	-5.58	3.62	6.22	-2.78	2.22	2.32	-6.88	6.82	2.42	7.82	5.22	4.92	-1.88	5.42	-11.78	-4.48	-4.78	2.82	0.22	-1.28	-3.38	0.52	-13.78
Decernotinib	2.56	-1.54	-3.94	-3.94	-3.94	-3.94	-3.94	-3.84	-1.84	-3.84	-3.74	-3.94	-3.94	-3.94	-1.94	-3.94	-3.94	-3.94	-3.94	-3.94	-3.14	-3.94	-2.74	-3.94	-1.74
Decitabine	9.14	17.54	4.54	10.74	-0.96	-6.06	3.34	-3.06	-2.26	0.44	-0.16	10.24	-0.06	1.04	2.34	0.54	-5.96	-2.96	-3.06	4.64	10.14	3.94	1.74	16.54	-5.56
Deferoxamine	1.96	6.26	2.56	7.86	1.46	0.76	5.76	3.06	-0.74	5.06	1.16	10.36	1.76	7.66	-0.54	-0.84	-0.74	4.66	5.06	0.76	3.86	2.46	2.66	4.76	-0.24
DEL-22379	-4.62	-0.02	5.18	-4.42	0.28	0.18	1.18	1.78	-4.72	0.98	1.28	1.38	-0.42	-2.82	-5.32	-1.82	-2.52	-2.42	-2.12	0.38	1.08	-1.62	2.18	2.48	0.28
Devimistat (CPI-613)	1.9	0	0	1.3	2.4	0	0	0	0	0	0	0	2.1	0.8	1	0	0.1	0.4	0	0	0	0	0.6	0	0
Dexamethasone	32.18	32.18	43.18	26.48	30.68	-1.52	29.28	-1.52	14.58	33.98	1.78	33.88	12.48	28.88	40.28	36.68	34.08	-1.52	30.78	28.58	38.78	-1.52	10.88	42.98	14.88
Digoxin	22.5	8.6	4	10.3	8.7	4.1	6.4	10	5.9	7.2	7.1	12.9	7.8	11.9	10.5	5.6	6.3	4.9	10.5	9.1	8.1	6.3	10	9.2	6.9
Dinaciclib	-5.34	-2.64	-6.64	7.16	-4.14	-1.74	2.86	-2.24	-7.74	7.56	1.26	-6.34	-3.64	-3.74	1.76	-4.04	-6.24	-7.04	-2.04	0.26	-0.64	-5.84	-4.34	-3.64	-10.84
Disulfiram(+CuCl2)	1.58	-1.02	-2.12	18.68	1.48	-1.02	-0.32	-1.52	5.18	13.58	2.28	15.78	7.38	8.58	1.78	3.38	16.08	-2.12	-2.12	0.78	5.38	-0.32	-2.12	10.68	-2.12
Docetaxel	22.4	23.4	15.5	21.2	5.1	8.5	15	14.6	16.4	18.5	21	23.7	22.9	18.6	7.3	8.2	15.9	12.3	14.1	20.4	22.6	21.1	19.5	21.7	8.5
Doramapimod	-0.24	4.96	4.16	1.06	1.26	2.16	2.66	1.16	-0.24	1.86	4.56	3.76	1.76	4.56	-0.24	-0.24	-0.24	7.06	-0.24	4.26	4.56	5.36	1.06	5.16	-0.14
Dovitinib	-0.14	1.56	6.86	-0.14	3.66	1.36	2.96	6.46	-0.14	-0.14	0.56	-0.14	0.06	-0.14	-0.14	-0.14	-0.14	0.96	-0.14	0.36	0.46	-0.14	10.06	0.26	-0.14
Doxorubicin	11.88	9.88	-0.12	13.38	3.98	7.18	13.08	7.48	7.68	10.28	7.48	13.28	5.48	10.38	14.78	9.08	-1.92	-1.82	3.38	5.18	10.58	9.28	4.08	11.38	3.18
Duvelisib	1.46	2.16	0.86	3.56	4.96	-0.84	4.96	-0.94	9.86	4.06	3.36	0.16	-0.94	-0.94	-0.14	-0.34	-0.94	-0.94	4.36	5.76	20.96	-0.94	-0.54	0.06	-0.94
E7820	30.82	21.72	4.92	18.02	6.22	-1.58	17.22	4.62	5.82	21.42	12.72	19.82	11.82	19.42	7.82	7.62	6.42	1.82	19.22	17.32	23.22	13.72	19.52	8.72	7.32
Eltanexor	13.56	13.16	11.36	8.46	14.46	4.66	12.06	2.36	16.76	7.26	11.06	14.16	8.16	11.36	22.26	6.76	2.76	-0.84	10.56	11.76	12.66	7.06	3.96	13.66	-1.84
Enasidenib	-0.8	-0.2	2.7	2	-0.6	1.7	-0.7	-0.8	4	0.1	-0.8	1.2	3.9	-0.4	0.8	-0.8	-0.8	-0.8	-0.8	1.2	2.2	-0.8	2.3	-0.3	-0.8
Encorafenib	0	8	0	0	1.4	0.2	0	0	0	3.8	1.4	16.2	2.9	1.7	0	0	0	0	3.5	1.3	1	1.6	0.1	0.9	0
ENMD-2076	2.54	9.54	10.34	5.54	4.04	1.44	4.24	9.14	-4.76	10.74	9.24	8.34	7.64	5.44	-2.76	0.34	5.84	-0.06	5.44	8.94	8.84	4.14	15.04	4.74	-0.26
Ensartinib	0.06	0.26	0.26	-2.64	1.86	0.86	-2.34	-2.84	-1.54	-0.24	0.76	1.16	-1.44	-2.84	-2.84	-2.84	-2.84	-2.14	-0.44	2.06	-1.44	-2.24	-0.34	3.86	-1.84
Entinostat	13.08	8.28	4.08	12.68	1.98	-3.72	4.98	3.68	7.68	8.08	8.28	11.58	4.48	8.98	11.38	8.88	-0.82	0.28	1.08	5.68	9.98	2.68	12.88	7.08	5.38
Entospletinib	-0.64	3.16	7.26	-0.64	1.06	-0.64	0.36	-0.64	-0.64	4.46	2.96	1.46	-0.64	-0.64	-0.64	-0.64	-0.64	-0.64	1.26	6.96	12.26	-0.64	4.56	1.36	-0.64
Entrectinib	-1.2	-1.2	3.3	-1.2	1.5	0.2	-0.7	3.2	-1.2	-0.4	-1.1	0.1	-1.2	-0.8	-1.2	0.4	-0.3	0.5	-1.2	-1.1	-1.2	-1.2	3.5	-0.7	-0.5
Enzalutamide	-0.82	1.48	0.88	1.58	-0.82	-0.32	0.68	-0.82	-0.82	10.28	-0.82	5.18	0.28	-0.12	-0.82	-0.72	-0.82	-0.82	0.68	-0.52	-0.72	-0.82	-0.82	3.38	-0.82
Enzastaurin	3.96	5.76	5.96	2.26	6.76	6.86	5.16	4.56	2.06	4.96	4.36	2.46	3.26	0.66	3.86	-0.04	-0.34	5.56	5.26	3.46	2.36	3.66	6.76	4.86	0.06
Epacadostat	-0.26	-0.26	-0.26	-0.26	-0.26	-0.26	-0.26	-0.06	-0.26	-0.26	0.74	2.44	-0.26	1.64	-0.26	4.24	3.74	-0.26	-0.26	-0.06	-0.26	3.34	8.34	-0.26	4.44
Epirubicin	13.82	10.12	-1.78	16.32	3.22	6.82	14.92	5.82	7.72	12.52	7.62	9.42	7.62	6.12	14.82	6.92	-5.28	-0.28	3.82	6.92	12.92	10.52	3.82	13.72	1.02
EPZ015666	-0.06	0.84	-0.06	9.34	-0.06	-0.06	0.34	-0.06	-0.06	2.34	-0.06	-0.06	-0.06	0.04	-0.06	-0.06	-0.06	-0.06	-0.06	0.84	1.24	-0.06	-0.06	1.54	-0.06
EPZ031686	0	0	0	0	0.9	0	0	0	0	0	0.6	0	0	0	0	0	0.6	0	0	0.5	0	3.5	0	0	2.6
EPZ-5687	-0.36	-0.36	0.24	-0.36	-0.36	-0.36	-0.36	-0.36	-0.36	-0.36	3.14	-0.36	-0.36	5.14	-0.36	-0.36	5.34	-0.36	-0.36	2.24	-0.36	6.64	-0.36	-0.36	5.74
Erastin	24.84	20.14	4.54	19.34	14.44	-0.76	7.64	-4.36	19.44	6.84	7.74	18.84	16.04	6.34	24.44	6.44	6.64	9.34	7.44	9.54	17.64	7.04	6.34	14.04	7.04
Erdafitinib	-0.56	-0.06	-0.46	0.44	-0.56	-0.56	0.04	-0.06	-0.56	-0.56	0.34	-0.56	-0.56	8.24	0.64	-0.46	5.34	-0.56	-0.56	1.74	2.04	0.44	0.24	-0.46	4.74
Eribulin	24.2	19.5	16.3	14.8	4.4	6.7	17.3	20.2	15.5	15.8	24	27	24	15.8	13.1	5.6	15.8	17.1	16	19.6	25.4	18.9	22.1	25.7	12.5
Erlotinib	2.36	5.86	5.46	16.16	3.46	2.66	4.06	4.06	3.96	7.36	3.26	7.06	8.66	1.76	1.66	-1.24	-1.24	-1.24	-1.24	2.96	4.26	-0.84	1.86	8.96	-0.34
Etoposide	21.34	20.64	5.44	23.24	6.74	7.04	21.44	13.04	20.94	22.54	16.34	24.94	14.84	13.24	19.74	10.24	14.94	2.64	14.14	16.34	25.14	20.34	15.54	26.84	5.24
Everolimus	16.5	9.3	8.9	10.7	1.5	-4.9	1	-5.3	11.8	10.5	10.3	19.6	3.3	4.2	3.4	-1.5	-5.3	-2	-3.8	2	16	4	1.4	6.1	-3.8
Exemestane	7.7	-0.9	-1.9	10	1	-0.4	2.2	-1.9	2.3	10.9	-0.8	5.8	3.6	-0.9	0.1	-1.9	-1.9	-1.9	1.5	-0.4	0.4	-1.9	-1.9	1.1	-0.1
Fedratinib	-6.96	-0.76	3.24	4.64	3.84	0.14	1.24	4.94	-6.16	0.64	-0.86	-0.76	-0.36	-0.26	2.54	-1.36	-1.56	-2.16	-1.26	-2.16	-1.06	-2.76	2.74	-0.66	-2.26
Filanesib	18.5	23	6.7	23.4	1.7	8.7	17.7	14.2	19.8	23.5	12.4	9.8	13.2	16.4	5.2	7.4	10.3	16.6	21	9.9	16.3	11.9	20.3	21.6	10.5
Filgotinib	11.66	0.06	6.16	-3.74	0.96	-3.34	-1.54	1.46	-0.74	-4.24	0.26	5.46	-1.94	5.36	1.26	2.86	5.86	-5.34	-2.44	2.56	1.56	1.16	1.96	-0.64	0.16
Fimepinostat (CUDC-907)	10.28	9.88	6.48	-3.82	7.28	3.28	10.88	9.18	8.88	-6.62	10.68	10.88	8.68	10.28	10.88	9.68	-3.42	1.78	8.68	8.68	10.88	2.78	8.68	10.68	5.18
Finasteride	-0.52	-0.52	0.48	-0.42	-0.52	-0.52	-0.52	-0.42	0.78	-0.32	-0.12	8.18	2.08	0.98	-0.52	1.88	3.48	-0.52	-0.52	-0.52	-0.52	-0.52	1.48	3.08	0.58
Fingolimod	-1.12	-0.22	2.28	0.28	6.88	1.68	-0.92	-0.72	-0.82	0.68	0.08	3.18	0.88	8.88	-3.42	1.58	6.18	-0.02	1.58	1.38	0.98	-1.52	0.48	7.48	0.48
Floxuridine	37.92	35.82	36.52	26.82	6.52	3.62	28.22	29.72	33.42	27.62	29.02	37.32	36.22	24.22	26.32	22.62	21.02	10.22	24.22	37.02	39.12	25.82	31.52	42.42	-1.98
Fludarabine	6.9	7.3	1.6	8.4	5.1	-10.6	8	-0.8	5.3	3.4	6	8.4	6	8	7.5	8.3	2.3	-6	4.6	7.7	5.9	-1.3	4	9.4	-10.6
Fluorouracil	1.86	3.46	8.56	6.56	1.76	-0.34	3.36	2.96	1.56	2.96	3.26	2.96	5.16	-0.04	-0.24	-0.14	-0.24	-0.24	1.86	3.16	2.96	1.76	2.76	3.46	-0.64
Flutamide	-0.56	1.94	-0.56	-0.56	-0.56	-0.26	-0.56	-0.56	0.34	-0.56	1.64	4.24	-0.46	9.74	-0.56	1.24	8.04	-0.56	-0.46	0.94	0.14	-0.56	2.44	-0.56	6.64
Foretinib	-0.56	2.24	10.84	3.44	0.34	1.84	1.64	17.84	-2.96	3.74	-0.06	7.84	2.04	7.04	-3.56	1.64	1.74	1.04	0.74	0.54	0.44	0.24	20.94	8.74	2.64
Fostamatinib	-2.84	3.16	8.06	15.26	1.96	-1.54	3.46	8.66	-2.84	5.26	1.76	4.66	2.56	0.56	-1.44	-2.74	-2.64	-1.44	2.96	2.96	7.96	-1.84	9.96	0.96	-2.84
FRAX486	-3.94	7.36	6.06	1.16	0.16	1.26	7.46	2.76	-4.04	6.46	5.16	4.76	3.26	5.86	4.16	2.36	5.36	-5.04	-1.14	5.46	7.06	-1.64	6.66	17.76	13.16
Fulvestrant	0	0	2.3	0	1.3	0	0	0	0	0	0	0	0	1.5	0	0	1.6	0	0	0	0	0.2	0	0	2.3
Galiellalactone	12.96	3.26	-0.34	7.46	3.66	-0.74	3.76	4.56	-0.44	7.16	6.76	4.16	7.16	4.16	11.36	-3.84	-4.54	6.06	5.16	5.26	7.76	3.66	3.56	3.46	1.46
Galunisertib	0	0	0	0	0	0	0	0	0	0	1.3	0	0	8.5	0	0	0	0	0	2.9	0	0	0.1	0	0
Gandotinib	-8.02	5.28	4.98	8.68	2.18	0.88	5.28	7.28	7.18	12.18	9.88	8.28	6.98	7.48	1.18	4.78	4.88	-1.52	4.58	6.28	8.88	4.98	10.48	7.78	-0.82
Ganetespib	2.74	1.24	3.84	1.14	1.34	-3.26	4.54	4.64	6.04	9.44	0.14	10.14	1.44	-1.36	6.64	-0.56	-1.86	-2.76	2.34	2.24	3.44	0.54	1.24	1.74	-5.36
GDC-0084	15	8.2	11.8	3	9	-0.3	7.5	3.9	6	6.1	9.5	13.2	4.2	11.2	7	10.7	8.7	2.5	7	10.9	20.8	8.8	14.4	5.1	6.6
GDC-0623	-0.4	-2.5	-3.3	-2.1	-0.4	-3.4	-3.2	-3.4	0.3	2.1	-0.4	-1.2	-2.3	0.6	1.7	-2.1	-0.5	0.1	3.8	-2.4	-3.4	-3.4	-3.4	-3	-0.7
GDC-0853	0	0	0	2.8	0	0	1.1	0	0	0	0	0	0	0	0	0.2	0	0	0	0	0	0.2	0	0	0
GDC-0919	5.6	0.9	3.1	0	6.7	3.1	0	0.2	0	0.1	1.6	6.4	0	0	0	0	1.2	0	0	3.3	0	4.3	6.5	0.1	4.4
Gedatolisib	14.76	11.26	1.06	-0.04	4.16	0.56	8.56	1.36	7.56	10.26	9.36	10.06	3.06	3.26	-1.64	3.66	1.16	1.46	5.16	15.16	17.46	9.16	1.16	8.36	0.66
Gefitinib	-3.04	2.26	4.16	5.66	0.96	0.16	0.96	1.36	-3.04	1.16	0.16	2.96	1.16	1.86	-2.94	-3.04	1.06	-3.04	-0.44	-0.04	1.66	2.36	0.66	1.56	-2.14
Gemcitabine	23.46	20.96	8.06	20.46	7.16	-8.04	18.56	16.76	15.06	19.56	16.26	26.36	16.66	21.56	13.36	12.86	10.26	8.06	14.46	17.96	18.46	12.96	24.86	17.06	-7.84
Gilteritinib	-2.52	1.88	2.28	13.58	2.38	1.78	1.58	10.38	-2.52	2.18	2.88	3.08	0.38	-1.32	-2.52	-2.52	-2.52	-2.52	-2.52	7.38	2.58	-2.52	4.38	-2.42	-2.52
Givinostat	6.9	4.8	3.9	10.1	5	2.4	12.9	4.7	10.6	9.4	7.6	13.5	5.5	8.6	15.6	3.4	-0.4	-1	1.2	3.7	9.8	0.2	4.4	8.1	-0.1
Glasdegib	0	0	0	4.1	0	0	0	0	11.9	0	0	0	0	0	0.7	0	0.1	0	0	0	0	1.6	0	0	0.3
Glesatinib	-1.96	0.04	9.04	3.74	0.54	0.84	-1.76	8.74	4.74	-1.56	-0.36	6.14	1.94	0.94	-0.36	0.14	2.94	0.34	-1.96	-0.76	3.74	4.44	14.14	7.24	2.74
GNE-0877	0	0	0	0	0	0	0	0	1	0.1	0	0	0	0	0	0	0	0	0	0	0	0.8	0	0	0
GNE-7915	-0.06	-0.06	-0.06	-0.06	-0.06	-0.06	-0.06	-0.06	-0.06	-0.06	-0.06	-0.06	-0.06	1.74	-0.06	-0.06	-0.06	-0.06	-0.06	-0.06	-0.06	-0.06	-0.06	-0.06	5.44
Golvatinib	-0.14	1.76	3.16	-0.14	-0.14	2.26	-0.14	3.26	-0.14	2.96	0.66	-0.14	2.46	0.26	-0.14	-0.14	-0.14	-0.14	1.06	0.56	4.26	2.46	6.56	3.56	0.76
Goserelin	-0.06	-0.06	-0.06	4.84	-0.06	-0.06	-0.06	-0.06	-0.06	-0.06	-0.06	-0.06	-0.06	-0.06	-0.06	0.14	-0.06	-0.06	-0.06	-0.06	-0.06	0.14	-0.06	-0.06	-0.06
GSK-1070916	18.96	20.46	13.16	22.86	8.36	0.36	17.76	9.86	17.66	21.06	20.26	11.16	23.36	6.66	2.06	7.46	13.06	-1.84	13.76	26.56	13.96	19.26	17.86	23.86	13.46
GSK2256098	1.16	-0.94	-0.14	9.66	1.66	-0.94	-0.94	-0.94	-0.94	4.16	-0.94	3.86	3.36	-0.94	-0.94	-0.94	-0.94	-0.94	0.56	-0.94	-0.94	-0.94	-0.94	-0.94	-0.94
GSK-2334470	-0.14	9.06	8.86	2.96	6.66	-0.14	6.36	0.46	7.26	4.86	6.36	7.26	0.76	6.16	-0.14	3.46	-0.14	3.86	2.96	7.86	18.56	3.86	3.26	9.96	2.16
GSK2636771	-0.02	1.28	0.08	-0.02	1.98	-0.02	3.68	-0.02	-0.02	1.18	1.08	0.38	-0.02	0.58	-0.02	0.58	0.68	-0.02	-0.02	2.38	5.18	0.68	0.58	0.38	-0.02
GSK2656157	-0.68	3.42	0.22	0.52	-0.28	5.42	-0.68	-0.68	-0.68	9.82	2.92	-0.68	4.72	5.02	-0.68	4.22	-0.68	-0.68	4.32	3.52	7.02	9.62	0.32	7.22	-0.68
GSK269962	7.46	18.26	-2.14	17.46	-2.34	1.56	7.66	-2.74	14.26	6.56	11.56	11.26	16.96	8.36	-2.34	10.36	8.46	-5.44	6.76	10.86	17.06	4.56	9.36	19.26	6.36
GSK2801	3.44	-0.16	0.04	4.44	-0.36	-0.16	-0.36	-0.36	4.84	6.24	-0.36	1.94	0.24	-0.16	-0.36	-0.36	-0.36	-0.36	-0.36	-0.36	3.24	-0.36	-0.36	-0.36	-0.36
GSK2830371	9.86	-0.94	-0.94	14.26	2.26	1.36	13.06	2.46	4.56	1.36	-0.84	2.96	-0.94	-0.24	8.26	-0.94	-0.94	1.06	-0.94	-0.94	1.46	-0.84	-0.94	3.46	-0.94
GSK2879552	-0.62	-0.42	2.08	-0.62	0.58	-0.62	-0.62	-0.62	-0.62	-0.62	-0.62	-0.62	-0.02	-0.02	-0.62	0.58	-0.32	-0.62	-0.62	-0.62	-0.62	-0.22	0.28	-0.52	-0.62
GSK343	0	0	0.1	0	0	0.1	0	0	0	0	0	0	0	0	0	0	0	0	0	0	0	0	0	0	0
GSK-461364	25.52	20.52	22.02	14.72	5.62	3.22	16.22	11.02	15.02	15.12	26.02	19.92	22.62	18.42	8.92	-3.18	5.82	17.42	15.82	21.72	20.92	21.82	28.32	27.22	11.82
GSK650394	0.86	0.96	5.86	1.36	-0.44	-1.44	-1.44	5.46	-1.44	-1.44	0.66	4.16	-0.94	11.66	3.76	-1.44	7.66	-1.44	-1.44	3.36	5.76	-1.44	7.56	-1.44	1.66
GSK-690693	8.58	8.28	8.18	7.38	8.98	2.18	8.28	0.88	6.38	-1.12	0.98	7.08	1.08	3.48	3.38	2.98	-0.32	2.68	8.78	3.88	17.08	12.88	5.28	-0.32	-1.12
GSK923295	10.68	19.88	6.88	14.28	-2.62	-0.72	10.58	6.88	6.38	17.08	10.28	14.18	8.28	8.58	-9.32	0.78	9.88	1.68	7.68	12.78	17.98	12.08	8.88	14.78	5.18
GSK-J4	-9.38	-8.08	-7.18	3.22	-4.78	-9.68	-7.88	-11.78	-10.78	6.52	-7.88	-8.88	-9.58	-7.18	-13.18	-8.98	-9.18	-8.38	-9.98	-8.18	-8.58	-7.88	-8.58	-8.48	-9.38
Hydroxyfasudil	3.98	1.18	-0.92	-0.72	-0.92	-0.92	-0.92	-0.82	0.08	-0.92	-0.12	0.78	-0.92	5.88	3.88	-0.12	2.58	-0.92	-0.92	-0.52	-0.72	-0.62	0.08	-0.52	5.68
Hydroxyurea	-1.04	12.76	-4.54	9.26	0.66	-1.74	1.56	1.86	-2.14	9.16	4.26	11.86	5.26	4.56	-4.44	-1.04	-3.74	0.86	2.56	7.66	9.66	4.06	5.36	9.96	-3.24
I-BET151	-7.44	9.36	6.36	10.66	1.86	0.86	5.46	5.66	-2.94	12.66	11.16	11.76	7.26	6.96	14.26	5.96	-0.14	2.06	3.46	7.16	12.26	-2.24	10.46	5.96	-3.54
Ibrutinib	0.9	2.2	1.8	5.2	0	0	9.1	0	0	7.8	1.3	2.7	1	0.1	0	0	0	0	2.4	1.2	15	0	0	10	0.1
Icotinib	3.6	3.2	0.7	1.8	0.1	0	0	0	2.9	0	4.9	5.7	3.2	4.8	1.3	0	6.5	0	0	2.1	1.2	0	3	1.2	7.5
Idarubicin	13.74	8.84	1.64	16.74	3.14	7.94	14.94	8.14	11.54	14.64	4.94	8.74	4.04	8.04	14.64	7.64	-3.66	-2.56	7.94	3.94	12.74	11.84	6.74	9.74	1.94
Idasanutlin	23.46	16.76	-12.54	16.96	13.66	4.96	15.36	18.36	18.16	18.26	22.96	25.66	19.06	18.66	21.86	12.26	-8.44	-8.74	5.66	20.76	20.96	8.16	-10.04	29.26	12.56
Idelalisib	5.74	1.84	-1.06	1.74	3.14	-2.16	5.34	-0.26	8.04	-1.36	7.54	5.64	-0.16	11.34	9.44	4.04	3.54	-2.16	7.24	7.94	23.84	2.74	3.54	-2.16	8.84
Imatinib	-0.44	1.06	1.86	0.06	-0.44	3.06	-0.44	-0.44	-0.44	0.36	-0.44	-0.04	0.36	0.16	-0.44	-0.44	-0.44	-0.44	-0.44	0.06	2.16	0.56	0.06	17.36	8.96
Imiquimod	9	0.4	0.4	0	0.6	0.8	0	0	1.5	0.1	0.9	2.7	0.3	1.7	0	0.9	0	0	0.4	0	1.7	5.1	0	0.3	4.4
Indibulin	8.74	12.04	12.74	17.04	-1.46	1.54	3.64	11.34	7.14	19.14	12.04	17.94	17.34	5.74	1.64	1.54	9.94	9.34	0.34	6.14	14.64	4.14	11.94	11.84	3.44
Infigratinib	0	0	0	0	0	0	0	0	0	0	0	0	0	0	0	0	0	0	0	0	0	0	0	0	0
IOX-1	8.64	5.64	3.74	2.94	3.24	-1.56	3.64	1.54	2.04	4.64	2.94	2.84	3.24	3.64	0.24	2.24	2.24	4.64	3.74	3.04	3.74	2.54	1.84	4.24	0.64
IOX-2	8.98	2.28	-0.22	4.18	-0.82	-0.82	-0.82	-0.82	3.38	4.68	-0.42	2.48	-0.82	1.78	0.88	-0.82	-0.82	-0.62	-0.32	-0.12	1.18	-0.82	-0.82	-0.82	-0.82
Ipatasertib	7	2.9	6.7	2.4	5.8	-0.3	7.3	0.7	7.9	-0.7	-0.2	4.3	-0.6	4.7	0.2	4.5	1.8	1.7	6.2	1.9	12	13.2	3.3	0.8	-1.8
Itraconazole	-1.72	0.18	1.88	10.68	-4.22	1.88	-2.12	-4.32	-3.22	3.58	-4.12	13.08	2.88	5.48	-4.32	-0.12	-4.12	-4.32	-1.02	-2.62	5.48	-4.32	-2.32	1.18	-2.32
Ivosidenib	3	0.1	0	0	0	0	0	0	0.6	0	0.9	0.2	0	11.9	0	0	0	0	0	1.1	0	0.6	0	0	1.8
Ixabepilone	2.08	4.68	2.28	3.68	2.48	2.18	1.58	1.58	1.48	6.98	2.58	6.98	5.08	1.88	-0.42	0.58	1.68	2.88	4.48	3.78	6.78	3.78	3.58	5.08	0.28
Ixazomib	5.56	5.56	8.46	6.06	6.56	5.26	3.46	3.16	4.66	8.46	6.56	6.26	6.46	5.26	8.96	7.96	6.56	0.66	6.66	6.66	7.36	6.76	13.06	11.46	4.06
JPH203	1.2	0	0	0	1.5	0	0	0.2	0	0	2.2	0	0	0	0	1.2	0	0	0	2.2	4.5	0.2	0	0	2.1
JQ1	-0.88	9.72	4.62	12.12	3.72	-2.88	8.12	7.22	-5.08	11.82	11.82	11.72	5.02	9.62	16.02	8.52	0.42	2.02	4.32	8.72	12.32	-3.58	11.42	3.02	-3.08
KD025	-5.36	-0.66	5.24	-1.06	-0.86	-1.36	-5.36	-5.36	-5.06	-3.26	4.04	0.74	6.44	3.94	-5.36	1.04	2.54	-1.16	1.14	1.84	-2.16	-5.36	-2.96	2.14	-3.16
KU-60019	-1.88	0.42	2.02	6.72	3.02	-0.68	1.92	-2.18	-2.08	3.12	1.22	5.72	4.12	0.92	-2.18	0.12	-2.18	-2.18	2.92	3.42	8.12	6.12	2.22	-0.58	-2.18
Lapatinib	0	0	0	0	0	0	0	0	0	0	0.2	0	0	12.1	0	0	0	0	0	0.3	0	0	0	0	0
Larotrectinib	-0.62	-0.62	-0.62	3.78	0.48	-0.62	2.78	-0.62	-0.62	0.88	0.98	-0.62	1.28	-0.52	-0.62	-0.62	-0.62	-0.62	0.48	-0.52	1.48	-0.62	-0.62	0.08	-0.62
Lasofoxifene	-1.28	-1.28	-1.28	2.62	-1.28	-1.28	-0.18	-1.28	-1.28	1.92	-1.28	-1.28	-1.28	-1.28	-1.28	-1.28	-1.28	-1.28	-1.28	-1.28	-1.28	-1.28	-1.28	-1.28	-1.28
Lenalidomide	1.62	-2.28	-2.28	-1.78	2.82	-2.28	-2.28	3.22	-2.28	2.42	7.42	1.02	-0.58	1.92	-2.28	5.42	-2.28	-0.38	-2.28	-2.28	4.42	-2.28	3.82	-2.28	5.02
Lenvatinib	0.06	2.16	3.86	6.16	-0.24	0.26	1.56	1.86	-0.14	4.76	1.36	0.86	-0.24	1.46	-0.24	-0.24	-0.24	-0.24	-0.24	-0.14	5.36	-0.24	0.36	6.46	0.66
Letrozole	-0.04	-0.04	-0.04	-0.04	-0.04	-0.04	-0.04	-0.04	0.76	-0.04	-0.04	-0.04	-0.04	-0.04	-0.04	-0.04	-0.04	-0.04	-0.04	-0.04	-0.04	4.76	-0.04	0.36	-0.04
Lifirafenib (BGB-283)	0.98	6.68	6.98	-0.52	4.78	6.88	2.38	7.98	1.98	3.78	5.58	13.08	3.28	4.88	0.68	7.58	8.28	-0.02	5.58	5.28	10.28	3.48	15.68	16.98	15.88
Linifanib	-1.12	-1.12	-1.12	-1.12	-1.12	-1.12	-1.12	6.08	-1.12	-1.12	-1.12	-1.12	-1.12	-1.12	-1.12	-1.12	-1.12	-1.12	-1.12	-1.12	-1.12	-1.12	1.28	-1.12	-1.12
Linsitinib	1.72	-2.68	3.92	-1.78	3.12	-0.68	-3.18	-2.28	-0.28	-2.88	-2.98	-0.38	0.92	2.32	-3.18	0.22	-0.08	-3.18	-3.18	-0.68	0.72	-3.18	0.62	-3.18	1.62
Litronesib	19.04	20.94	14.84	22.44	4.44	7.74	18.04	14.74	18.94	21.44	18.44	20.64	19.84	15.64	7.44	8.54	10.94	14.34	21.54	19.64	22.14	22.34	20.54	21.74	9.64
Lomeguatrib	0	0.4	0.5	0	1	0	0	0	0	0.3	0	0	0.8	0	0	0	0	0	0	0	0.8	1.2	0	0	0
Lonafarnib	-1.06	7.54	4.64	7.04	9.34	3.04	3.64	-1.56	6.14	9.74	9.14	12.84	3.44	9.24	4.54	7.44	1.54	4.04	6.24	7.84	8.64	8.04	14.14	11.94	-3.36
Losmapimod	-0.18	2.72	-0.18	-0.18	1.92	-0.18	0.42	-0.18	-0.18	7.12	6.92	4.42	3.32	-0.18	-0.18	-0.18	-0.18	-0.18	0.82	7.82	11.52	-0.18	-0.18	0.42	-0.18
Lovastatin	7.8	0.1	-0.1	-0.1	0	-0.1	-0.1	-0.1	-0.1	-0.1	2.7	4.3	0.8	8.7	8.4	-0.1	-0.1	-0.1	-0.1	2.5	0.2	1	5	-0.1	-0.1
Lucitanib	1.18	5.48	2.08	1.98	-0.62	1.58	3.58	5.18	3.48	2.08	6.28	6.38	1.68	4.18	-0.62	-0.62	0.58	-0.62	1.58	5.88	6.38	6.88	4.98	3.48	0.98
Luminespib	6.3	-1.5	4.6	3.1	6.5	-5.2	4.1	4.4	6.5	0.6	-3	6.7	-1.4	-3.9	8.3	1.7	-5.8	-2.9	-0.5	-3.9	3.6	-1.5	2.1	-1	-6.3
LY-2584702	12.26	0.76	0.66	3.76	-0.14	-0.14	-0.14	-0.14	13.26	3.56	0.66	9.76	5.56	0.26	5.16	1.86	0.46	-0.14	-0.14	-0.14	8.26	-0.14	-0.14	8.76	-0.14
LY-2874455	-1.34	1.96	4.96	4.66	0.36	-0.54	-2.14	5.46	-7.04	8.66	-1.54	-2.44	1.36	-0.74	-7.04	-0.64	-1.74	-1.44	7.16	6.06	10.56	-0.64	6.26	6.76	-0.74
LY3009120	7.76	10.46	4.86	12.06	9.16	5.76	6.76	3.96	0.36	10.66	9.16	21.26	7.86	9.76	8.66	8.96	4.96	1.76	6.66	5.86	12.66	-2.24	5.66	16.06	7.86
LY3023414	10.28	9.78	4.88	5.48	3.88	-1.82	5.48	-1.02	12.28	6.88	8.68	13.88	2.68	6.98	-1.42	1.08	0.48	-0.52	3.68	8.18	17.58	6.78	5.08	6.98	-1.22
Marimastat	-1.28	-0.68	5.22	-1.28	-1.28	-0.88	-0.38	0.22	-0.98	-0.58	-1.28	7.22	-1.28	9.42	-1.28	0.92	4.12	4.22	-1.28	-0.18	2.02	-1.28	-1.08	4.52	3.72
Masitinib	-4.38	1.32	-1.28	-3.88	-1.78	3.32	-1.48	-3.48	-4.38	-4.38	1.22	-1.58	-2.18	-1.68	-4.38	-4.38	-4.38	-4.38	0.32	1.22	0.02	-0.98	0.22	7.52	1.82
Megestrol_acetate	7.02	2.52	17.92	0.42	0.52	1.62	-0.38	-0.58	-0.58	-0.18	3.92	3.02	-0.38	14.52	4.22	7.52	6.52	-0.58	1.72	4.42	4.32	0.52	3.42	0.32	7.82
Mepacrine	-1.7	-3.7	0.2	-2.9	-3.3	-5.7	2.7	0.6	-9.5	-4.1	-3.6	0.1	-4	-5.6	-1.2	-8.4	-10	-7.9	-5.5	-0.3	-4.5	-3.3	-0.1	-1.1	-7.6
Mercaptopurine	7.4	8	14.9	17.7	0.5	0.5	6.6	6.9	12.4	15.8	15.4	14.9	17.1	13.4	0	11.1	10.7	7.9	9.1	8.9	14.2	17	12.6	12.7	0
Merestinib	-0.62	0.48	15.18	-0.62	-0.62	-0.62	-0.62	14.78	-0.62	-0.62	0.18	-0.62	-0.62	9.68	-0.62	-0.42	8.28	2.58	-0.62	0.88	1.08	-0.62	19.78	-0.62	-0.62
Metformin	-0.02	-0.02	-0.02	-0.02	-0.02	-0.02	-0.02	-0.02	-0.02	-0.02	-0.02	-0.02	-0.02	0.58	-0.02	-0.02	-0.02	-0.02	-0.02	-0.02	-0.02	0.08	-0.02	-0.02	-0.02
Methotrexate	17.78	0.58	-0.12	20.08	-0.42	1.68	2.38	9.88	0.28	22.08	-0.42	-0.12	-0.02	13.78	10.38	9.68	12.68	6.68	16.38	-0.42	9.48	-0.22	-0.42	-0.32	-0.42
Methylprednisolone	27.2	22.3	34.1	14.2	22.9	-2.3	18.5	-2.3	11.6	25.4	4	21.1	5.9	26.5	33.2	31.6	24.8	-2.3	22.4	18.6	30.2	-2.3	7.9	32.9	15
Midostaurin	10.06	13.96	14.76	11.66	4.66	-3.84	6.86	13.36	-1.14	13.06	11.66	12.06	10.56	3.86	-0.64	3.66	5.36	-0.64	7.56	14.36	16.16	3.66	19.26	8.96	0.66
Milciclib	-0.06	12.54	9.94	7.64	5.44	1.74	12.04	12.64	-2.56	13.64	9.94	5.84	5.94	9.54	-5.26	-0.06	-0.86	3.34	1.94	4.94	14.34	4.44	10.04	8.14	-1.16
Miltefosine	-1.54	1.46	2.26	2.76	1.36	-1.54	0.46	-1.14	1.76	9.36	0.46	7.56	7.46	6.96	-2.94	-1.34	5.26	-0.34	1.66	2.26	3.16	2.76	4.36	2.36	-1.64
Mitomycin_C	-1.36	2.34	-0.76	9.74	0.44	-2.86	-2.86	-2.86	4.24	8.64	4.04	4.24	2.34	1.54	-2.86	-1.66	-2.86	-2.86	-2.86	2.24	4.84	3.74	3.84	1.24	-1.96
Mitotane	-0.08	-0.08	-0.08	-0.08	0.02	-0.08	-0.08	-0.08	-0.08	-0.08	-0.08	4.32	-0.08	1.32	-0.08	0.12	-0.08	-0.08	-0.08	-0.08	-0.08	-0.08	-0.08	-0.08	-0.08
Mitoxantrone	16.34	15.64	-0.06	16.34	7.94	13.24	15.84	12.74	12.34	11.94	11.84	16.34	6.74	7.34	14.44	11.14	-5.06	-5.06	2.44	7.84	16.24	12.64	8.04	15.74	4.54
Mivebresib	-13	16.5	6.1	7.7	6	1.6	12.7	10.9	-14.8	8.2	17.4	16.6	8.9	14.8	17.2	12.5	0.6	0.5	6	15.3	18.1	-1.8	16	7.8	-5.7
MK-0752	4.6	0	0	0	0	0	0	0	0	0	0	0	0	3.8	0	0	8.6	0	0	2.5	0.3	0	0	0	0
MK-2206	4.76	3.76	5.46	3.56	5.06	-1.64	2.76	-0.44	6.46	0.36	4.36	3.46	0.06	9.66	3.86	5.76	6.26	2.46	2.76	6.36	13.16	6.26	4.36	-0.44	7.36
MK-8745	18.3	8.9	9.9	14.3	2.7	5	14.1	11.2	6.8	16.4	13.2	13.2	11.5	12.2	7.1	4.5	12.4	12.4	9.6	9.1	9.7	11.6	18.3	18.3	9.4
MK-8776	3.64	1.54	4.44	1.04	0.54	-0.96	2.64	2.24	-1.46	1.84	1.54	-0.46	0.54	2.54	0.04	-0.46	-1.46	1.14	-1.36	-1.16	3.94	0.24	2.64	-0.06	-1.46
ML323	-0.36	3.54	3.14	1.14	2.04	3.64	-0.36	-0.36	0.14	-0.06	0.04	1.14	0.54	0.24	-0.36	-0.36	0.14	0.64	1.84	0.54	3.34	3.44	1.14	2.94	-0.26
ML390	12.4	16.4	5.3	16.9	8.6	-1.2	3.2	4.1	2.9	17.7	13.1	22.3	7.4	4.1	-1.2	1.8	-1.2	6.6	10.8	13.6	21	16.1	10.8	19.1	-1.2
Mocetinostat	15.54	8.84	7.24	14.74	4.24	2.74	8.84	6.74	6.74	10.14	9.14	9.24	9.14	7.74	12.44	8.04	-3.16	-0.46	2.94	7.54	9.54	3.94	9.04	9.64	1.44
Molibresib	-5.5	7.4	3.6	6.9	1.7	-2.1	5.3	5.3	-2.7	10.9	9.1	10.6	3.7	8.4	16.7	6.9	3.4	1.6	3.2	6.4	7.7	0.8	7.7	3.2	5.2
Momelotinib	-9.62	2.68	2.48	0.28	-0.92	-3.92	-0.12	0.98	-5.82	-3.42	-0.12	-1.62	-4.62	-2.22	-9.42	-1.12	-6.72	-8.32	-0.32	1.58	5.78	-4.82	1.48	0.88	-4.72
Motesanib	-0.22	-0.22	-0.22	0.08	-0.22	0.78	1.98	-0.22	-0.22	4.28	-0.22	-0.22	-0.22	-0.22	-0.22	-0.22	-0.22	-0.22	1.28	-0.22	-0.22	-0.22	-0.22	-0.22	-0.22
Motolimod	-4.38	-2.68	-3.88	-4.18	-2.38	0.42	-4.48	-2.28	-4.48	-3.68	1.22	1.52	-3.58	-3.98	-4.48	-4.48	-4.48	-4.48	-3.38	-1.58	-1.68	-2.48	-3.38	-3.58	-3.48
MST-312	6	-1.2	5.6	12.8	3.2	1.1	8.6	1	-1.6	9.6	5	15.2	8.1	10.8	-4	1.8	0.8	2.8	9.5	8.1	0.7	7.4	0.6	9.5	-3
Mubritinib	0.66	15.46	6.16	11.06	2.76	16.16	-0.84	-2.24	11.56	7.06	3.56	7.76	4.86	4.76	3.06	3.46	-2.24	4.66	12.06	7.06	12.66	19.96	6.56	10.56	0.26
Napabucasin	-2.08	-0.88	0.92	-0.18	-0.18	-9.68	-3.48	0.92	-3.38	-1.58	-1.28	3.72	-0.38	3.72	-3.28	0.12	-7.38	-11.78	-1.48	0.42	-1.38	-1.58	0.52	1.22	-1.28
Navitoclax	26.12	13.02	23.62	22.12	28.92	19.22	23.42	26.42	24.82	22.52	19.82	23.22	22.22	21.12	29.02	18.42	22.92	19.22	11.72	16.82	3.32	4.92	14.22	27.52	16.92
Necrostatin_2	-0.08	-0.08	-0.08	-0.08	-0.08	-0.08	-0.08	-0.08	-0.08	0.02	-0.08	-0.08	-0.08	-0.08	-0.08	-0.08	-0.08	-0.08	-0.08	-0.08	-0.08	-0.08	-0.08	-0.08	-0.08
Neflamapimod	4.7	2.9	5	0	2.2	1.3	0.1	0	0	1.4	3.1	4	0.9	1.8	0	0	2.1	0	0.6	2.2	6.7	3.1	1.5	0.5	0
Nelarabine	-6.32	1.58	0.08	4.78	-6.22	-9.72	-2.32	-5.82	-10.22	1.18	1.98	-7.82	-7.22	-4.22	-3.72	-3.12	-10.22	-9.52	-4.82	-1.82	1.98	-6.32	-10.22	5.78	-10.22
Neratinib	4.98	6.28	5.28	6.58	5.68	5.48	7.78	3.68	-0.72	2.28	3.68	2.28	3.58	2.58	4.98	-0.22	-0.32	1.78	0.48	2.78	5.38	-0.12	1.28	1.48	-0.52
Nilotinib	6.1	1.3	4.6	8.2	0.6	0.7	0	0	4.1	0.9	4.6	9.7	9.1	8.9	0.5	2	5.8	0	0	2.5	8.3	2.5	4.9	31.6	21
Nilutamide	-0.48	0.22	-0.08	-0.48	-0.48	-0.48	-0.48	0.22	-0.48	-0.48	-0.28	-0.48	-0.48	7.92	-0.48	2.02	7.02	-0.48	1.82	-0.18	-0.48	0.22	-0.48	-0.48	3.42
Nintedanib	-4.56	0.84	11.14	8.74	-0.16	2.14	5.14	14.14	-6.36	-0.96	-1.26	-5.26	-4.36	1.04	-0.26	-1.66	-2.76	-1.76	-2.36	-1.46	3.64	-5.16	16.04	9.44	0.84
Niraparib	15.78	12.88	6.08	14.18	4.68	-2.02	8.48	1.58	4.28	5.68	5.78	16.08	3.38	3.78	10.68	4.58	4.08	-2.82	1.18	5.98	6.48	-0.02	2.98	17.18	-1.72
NMS-873	-4.24	14.06	4.36	10.26	4.56	14.56	2.56	-0.14	4.26	4.86	1.26	4.06	4.76	6.76	6.06	6.96	3.26	2.86	7.36	4.66	11.66	11.96	5.06	10.56	2.26
NVP-AEW541	4.48	-2.72	3.98	5.08	5.38	2.48	-0.72	3.58	-3.62	-4.62	-2.72	-2.62	-0.92	3.28	-7.62	0.08	-0.42	-1.42	-4.02	-2.02	1.18	0.88	1.38	-2.02	-7.62
NVP-BGT226	12.22	14.22	6.72	0.72	6.42	-0.48	5.92	-0.18	7.92	9.02	8.42	9.52	2.22	3.92	0.62	2.32	-2.88	-0.18	4.32	12.22	20.12	8.22	6.82	10.22	-5.58
NVP-BHG712	1.28	3.78	2.48	3.68	4.48	-2.32	-2.32	3.38	2.38	2.88	5.18	7.78	3.38	5.28	1.48	1.18	2.98	-2.32	-2.32	5.98	7.78	6.18	2.48	7.98	7.28
NVP-CGM097	11.36	7.86	-3.84	10.76	2.86	6.56	12.06	11.66	8.16	16.76	14.46	10.36	10.06	10.76	13.06	7.06	-6.34	-4.54	5.66	10.16	10.56	5.16	-4.84	18.56	7.86
NVP-LCL161	-5.02	-4.92	0.38	-2.32	12.18	6.58	-5.42	-3.52	2.88	-5.82	-2.72	0.28	-5.42	3.98	-3.22	1.58	2.48	-5.82	-5.82	-1.12	-0.52	2.38	-0.22	-3.82	-1.92
NVP-LGK974	1	5.6	3.4	-1.3	3.3	6.2	-0.1	0.8	1	-0.8	0.1	2.6	1.2	1.9	2	3.5	1.5	0.7	3.7	2.1	5.6	4	2.2	3.9	3.4
NVP-RAF265	2.68	9.68	6.68	5.08	10.28	5.98	5.98	6.08	-0.22	9.28	4.48	4.18	7.48	11.98	7.68	7.48	2.88	6.18	-0.22	4.38	6.68	2.18	4.48	7.78	6.28
NVP-SHP099	-2.78	-2.78	-2.78	5.02	-2.18	-0.68	0.82	-2.78	-2.78	2.42	-2.58	-2.78	-2.78	-2.68	-2.78	-2.78	-2.78	-1.88	0.52	-0.78	-2.78	-2.78	-2.78	3.92	-1.08
ODM-201	-0.08	0.12	0.52	10.62	2.52	-0.28	4.62	-0.28	-0.28	4.42	-0.18	0.02	1.62	0.02	0.82	-0.28	-0.28	-0.28	1.22	0.22	1.12	0.02	-0.28	4.22	-0.28
Olaparib	26.78	6.78	-0.12	11.68	3.38	-1.32	4.38	2.88	4.78	5.68	4.98	9.68	2.68	8.88	21.88	8.68	1.28	-3.42	1.48	2.98	7.38	1.48	5.18	13.08	4.48
Olmutinib	-0.02	-0.02	-0.02	-0.02	1.78	-0.02	1.28	-0.02	-0.02	-0.02	1.68	-0.02	-0.02	6.88	-0.02	-0.02	5.88	-0.02	-0.02	1.38	1.58	2.28	-0.02	-0.02	-0.02
Omacetaxine	14.12	10.52	-3.38	4.12	4.62	13.02	7.92	4.82	10.82	-0.68	1.12	5.02	1.52	3.82	15.62	3.52	-6.78	-8.18	4.52	3.12	7.22	-1.08	4.22	7.82	-2.08
Omaveloxolone	10.88	4.78	3.08	10.48	4.88	0.48	3.38	2.58	6.38	5.18	1.88	8.68	7.38	0.58	10.08	1.28	3.98	4.58	2.58	0.68	6.28	2.58	4.88	8.38	1.48
Omipalisib	22.2	11.9	21.9	9.8	19.5	-1.1	13.4	1.6	12.9	6	12.6	15.1	1.6	11	11.4	13.1	4.5	8.1	17.2	18.6	30	14.4	9.4	7.3	-2.2
Onalespib	6.52	2.82	1.62	7.92	3.32	-2.38	7.22	3.92	7.72	11.52	-2.18	6.82	3.22	-1.28	8.42	-0.48	-4.68	1.82	5.52	1.32	6.52	-0.08	3.92	3.92	-3.28
ONX-0914	5.5	-5	-3.9	-0.8	8.7	6.2	2	0.9	0.6	-2.6	-4.1	1.5	-1.2	0.5	7.2	2.9	9.8	-2	-1.7	-1.8	-4.4	-1.6	7.2	11.5	0
Oprozomib	0.3	0.2	0.8	3.5	8.4	1.2	2.2	3.7	-1.1	2.6	3.2	3	3.7	0.4	3.3	1.4	0.9	1.9	-0.4	5.7	-1.1	-0.4	11.3	14	-1.6
Orteronel	1.4	0	0	4.9	0	0	0	0	4.6	0	0	1	4.9	0	0	0	0	0	0	0	0	0	0	2.1	0
Osimertinib	-3.82	-1.42	-0.72	-4.12	2.98	1.68	0.78	2.18	-3.52	-1.42	3.88	-0.82	-0.42	3.18	-4.62	-1.12	0.58	-4.42	-1.62	1.08	-1.02	0.88	0.58	-2.02	2.98
OSU-03012	9.6	10.8	7.7	8	-0.2	-0.2	-0.2	0	0.1	13.6	8.1	7.4	2.7	7.1	-0.2	2.9	5	5.4	13.3	7.6	17.3	12.5	8	7.5	-0.2
OTS167	9.38	5.48	-2.12	6.58	6.18	4.08	7.08	5.88	4.58	2.88	3.58	5.68	-3.42	3.18	-1.02	2.58	-8.72	-4.52	-1.52	0.98	8.28	2.18	0.58	2.98	-7.22
OTS-964	3.42	2.42	0.32	2.02	1.52	-1.58	2.82	0.82	2.32	2.52	1.12	1.72	-0.48	1.62	-0.38	0.12	-2.48	-3.18	2.02	2.32	4.72	1.32	2.52	3.42	-10.98
Oxaliplatin	10.62	16.02	-0.78	15.62	4.92	8.32	12.92	14.22	12.82	6.62	13.62	16.92	10.62	13.92	10.32	12.12	2.92	-1.48	6.12	14.12	11.62	10.02	8.52	16.62	-0.08
PAC-1	0.38	4.08	0.98	1.18	2.08	1.08	4.98	0.98	-0.72	0.98	0.38	5.28	0.18	5.58	-0.22	1.18	-0.42	3.58	2.18	1.18	1.18	3.48	2.98	2.08	0.98
Paclitaxel	19.94	22.44	17.84	21.54	5.14	6.84	12.84	11.54	18.34	21.04	19.64	22.44	23.04	17.34	5.24	7.24	12.24	14.14	16.74	22.04	21.84	23.14	21.34	21.14	8.14
Pacritinib	-8.7	-2.6	-0.4	0	2.9	-4	2.9	2.2	-2.3	-3.9	-0.9	-4.7	-5.6	-7.9	-7.7	-5.3	-8.4	-8.2	-2.3	1.2	9.2	-3.2	1.5	-3.7	-9.2
Palbociclib	-0.12	14.28	4.08	0.38	2.88	-5.62	8.78	0.88	0.88	7.98	8.78	16.48	4.38	3.68	5.38	-1.82	-1.72	1.98	3.68	9.58	16.08	3.08	4.98	2.38	-5.22
Palomid-529	5.86	0.06	2.86	17.16	-0.24	-0.24	0.26	-0.24	-0.24	2.56	0.66	10.26	12.56	1.06	-0.24	-0.24	-0.04	-0.24	-0.24	-0.24	-0.14	6.66	1.76	5.26	-0.24
Panobinostat	12.14	7.64	6.14	14.24	4.84	2.84	14.64	7.74	14.34	11.84	11.74	18.24	5.84	8.44	15.64	4.94	-0.46	2.94	4.14	6.64	14.14	0.44	3.94	10.24	2.74
Pazopanib	-0.86	4.94	-1.06	0.74	-1.26	-0.76	-1.26	2.24	3.44	0.64	3.64	5.64	5.24	6.24	-1.26	-1.26	-1.26	-1.26	-1.26	5.14	10.54	4.14	4.54	-0.96	4.54
PCI-34051	10.24	4.34	2.84	8.04	0.74	0.94	5.44	3.14	-1.06	5.74	2.24	8.74	4.54	6.24	1.74	0.64	-0.86	2.44	1.54	2.24	1.54	2.54	2.94	3.64	-0.96
PD0325901	2.24	0.14	4.34	2.44	6.94	-0.26	1.84	-2.86	10.14	7.14	4.44	10.14	6.24	-0.36	14.94	6.24	-4.16	2.74	7.54	-4.16	-1.96	-4.16	-3.16	13.54	2.94
Peficitinb	-5.46	-4.96	0.24	-1.86	-5.46	-5.46	-5.46	-2.56	-5.46	-5.46	-5.46	-5.26	-5.46	-5.46	-5.46	-5.06	-5.06	-5.46	-4.86	-0.86	-3.46	-5.46	0.54	-3.86	-5.46
Pemetrexed	22.58	28.28	30.88	27.28	4.28	1.58	7.98	19.08	19.28	25.88	18.58	30.18	20.98	18.68	13.48	15.18	12.18	7.38	24.48	26.38	28.78	22.08	25.58	27.98	-0.72
Pentostatin	-0.44	-0.44	-0.44	3.06	1.26	-0.44	-0.44	-0.44	-0.44	-0.44	-0.44	-0.14	-0.44	-0.44	-0.44	-0.44	-0.44	-0.44	-0.44	-0.44	-0.44	-0.44	-0.44	0.66	-0.24
Perifosine	-0.16	-0.36	0.94	-0.26	0.64	-0.36	4.04	-0.36	8.74	0.54	-0.36	-0.26	4.04	-0.26	-0.36	-0.16	-0.36	-0.36	-0.36	-0.36	2.34	-0.36	-0.36	1.04	-0.36
Pevonedistat	8.5	13.1	12.7	12.2	6	2.7	8.5	19.1	6.3	10.1	6.2	13	10	10	7.4	11.5	9.4	4.1	12.1	11.1	12.3	10.3	9.9	15.2	6.7
Pexidartinib	-2.22	3.18	6.68	-2.22	-1.92	-1.32	-2.22	8.78	-2.22	-0.82	1.18	0.68	1.98	-0.92	-2.22	-2.22	-1.92	-1.22	0.18	4.48	1.58	0.38	12.58	-0.22	-2.22
PF-00477736	8.68	9.38	9.28	11.48	1.98	-0.72	7.08	5.88	-6.12	11.48	7.88	7.38	7.58	3.48	0.38	0.88	4.58	3.98	6.28	9.08	11.48	10.18	7.28	6.58	-0.12
PF-00562271	4.02	2.62	6.62	4.52	0.82	-0.08	2.42	6.62	-0.38	-0.18	0.12	1.02	3.82	-1.28	4.82	-0.78	2.42	0.42	5.22	2.72	3.62	5.12	7.22	4.62	-3.28
PF-03758309	22.18	16.38	5.58	4.28	3.98	-7.92	6.18	1.68	3.28	9.28	11.58	18.28	3.98	0.38	0.18	0.88	-7.42	2.58	1.18	11.98	22.68	-3.72	2.28	12.78	-7.92
PF-04708671	-0.84	4.16	3.86	1.46	-0.14	4.56	-0.84	2.76	2.76	-0.74	3.86	8.36	4.16	5.56	2.46	5.46	8.66	0.06	1.96	5.26	6.46	6.26	9.76	3.46	-0.84
PF-06463922	-0.72	-0.72	-0.72	7.38	2.18	-0.72	-0.72	-0.72	4.68	1.98	-0.72	11.28	-0.72	-0.72	-0.72	-0.72	-0.72	-0.72	-0.72	-0.02	3.38	-0.72	-0.72	-0.72	-0.62
PF06650833	-1.32	1.88	2.08	2.88	1.28	0.38	3.08	3.68	-1.32	6.08	0.08	1.78	0.08	-0.22	1.58	-0.92	-1.32	-1.32	4.48	2.38	2.58	-1.32	1.48	0.98	-1.32
PF-3845	-1.34	4.06	2.36	-0.04	-0.54	3.96	-0.84	-1.34	-0.24	3.16	-0.84	0.46	-0.54	-0.24	-1.34	0.96	-1.24	0.36	2.86	0.46	5.66	2.96	0.96	3.16	-0.94
PF-4800567	5.46	0.26	0.66	3.96	2.06	-0.64	1.56	-0.64	2.46	7.76	1.06	5.66	0.26	1.76	0.66	-0.64	-0.64	-0.64	-0.54	0.56	6.06	-0.64	-0.64	0.16	-0.64
PF-670462	1.4	4.8	3	2.5	0	0	0.7	2.5	12.6	6.1	1.7	9.2	3.1	4.1	0.1	0	0.1	0.9	0	4.3	13.5	0.8	1.2	2.4	1.5
PFI-1	0.1	3.7	2.7	16.2	8.7	0.3	3.1	3.5	2.4	9.8	6	17.3	4.2	3.5	5.4	2.7	-4.1	-1	1.7	6.1	5.4	-0.6	4.7	8.5	-4.5
PH-797804	0	2	0	0	0	0	0	0	0	0	2.3	0.7	0	4.9	0	5	0.3	0	0.1	4.5	7.4	4	1.9	0	0
PHA-408	5.68	0.78	0.78	5.08	3.38	-1.22	-3.92	0.18	4.48	3.28	2.48	3.88	3.98	1.58	-0.72	2.18	-0.82	-4.62	0.78	1.48	5.28	0.08	-2.02	3.08	-1.22
Pictilisib	16.36	7.36	14.56	5.56	11.96	-0.74	12.86	3.96	8.46	1.86	10.06	14.76	0.16	12.26	10.56	9.26	-0.64	4.66	12.86	12.96	26.16	10.46	9.66	0.16	2.56
Pilocarpine	-1.56	-1.56	-1.56	-1.56	-1.56	-1.56	-1.56	-1.56	-1.56	2.74	-1.56	-1.56	-1.56	4.44	-1.56	-1.56	7.44	-1.56	-1.56	-1.56	-1.56	-1.56	-1.56	-1.56	-1.56
PIM-447	19.72	2.42	6.42	-0.48	7.92	1.42	-5.18	-3.38	9.12	-0.18	-3.68	4.92	1.72	1.72	-0.48	2.52	-1.78	-5.98	-5.98	-1.78	11.32	5.62	-3.68	-1.58	-2.78
Pinometostat	0	0	0	0	0	0	0	0	0	0	0	0	0	0	0	0	0	0	0	0	0	0	0	0	0
Pirfenidone	0	0	0	1.2	0	0	0	0	0	0	0	0	0	0	0	0	0	0	0	0	0	0	0	0	0
Pixantrone	-2.76	-0.36	-2.76	-2.76	0.34	-2.66	-2.76	-1.36	-2.76	-2.76	-0.36	-0.56	-2.76	1.34	-2.76	-2.56	-2.76	-2.76	-2.76	-1.06	-2.76	0.24	-1.36	-2.76	-2.06
Plerixafor	0	0.7	0	0	0	0	0	0	0	0	0	0	0	0	0	0	0	0	0.3	0	0	0.1	0	0	0
Plicamycin	7.14	-17.46	-15.86	7.54	-15.36	0.04	2.34	-2.36	-17.16	8.34	-17.46	-17.76	-16.66	-6.26	5.34	-7.26	-16.96	2.74	7.34	-16.26	-17.26	-13.36	-16.56	-15.56	-13.76
Pomalidomide	-0.26	1.74	8.14	-0.26	5.24	0.04	0.64	0.24	-0.26	3.44	6.84	-0.26	4.54	-0.16	-0.26	7.54	-0.06	-0.26	-0.26	0.54	9.54	2.74	3.64	-0.26	-0.26
Ponatinib	9.52	6.62	14.12	10.32	5.52	1.12	10.22	16.02	-1.78	5.12	5.42	27.12	0.32	5.92	10.72	4.72	-3.08	-0.08	0.82	9.02	14.82	2.62	19.42	31.82	19.02
Poziotinib	-0.22	-0.22	-0.22	3.98	-0.22	-0.22	1.58	-0.22	5.98	2.18	0.98	-0.22	0.78	-0.22	3.08	0.68	3.28	-0.22	-0.22	-0.22	4.98	-0.22	3.88	2.98	1.28
Pracinostat	13.18	7.68	5.58	10.08	3.58	0.18	12.98	6.18	12.48	8.88	8.18	8.68	6.18	8.98	16.48	6.28	3.18	0.98	2.78	5.68	14.58	0.38	5.28	5.98	5.78
Pravastatin	3.04	-0.66	-0.66	0.64	-0.56	-0.66	-0.46	-0.66	-0.66	1.04	-0.66	-0.66	3.04	-0.36	0.74	-0.66	-0.66	-0.66	-0.66	-0.66	-0.56	-0.66	-0.66	0.04	-0.66
Prednisolone	23.8	17.8	28.9	16.2	20.6	-3	16.9	-3	13.5	20.1	2	22.6	8.4	23.1	26.7	25.5	18	-3	15.9	15	26.8	-3	2.9	28.1	4.8
Prexasertib	15.74	18.44	14.54	19.44	4.24	-0.96	14.84	16.14	16.24	18.84	20.44	20.44	19.64	20.14	13.44	11.44	19.44	13.84	18.44	21.34	20.94	17.04	15.94	20.94	8.94
PS-1145	-0.46	0.44	-0.36	-0.46	-0.46	-0.46	-0.46	3.44	-0.46	-0.46	0.44	-0.46	-0.46	6.74	-0.46	-0.46	9.14	-0.46	-0.46	1.94	3.04	1.94	0.04	-0.46	-0.46
PTC-209	-1.48	5.62	-0.98	4.12	-0.38	-2.58	-0.78	0.92	-2.68	9.02	1.92	4.82	0.12	1.92	-5.08	-2.68	-1.78	-2.38	2.22	4.52	7.12	3.62	2.42	-0.18	-2.18
Quisinostat	6.68	8.68	5.98	12.28	6.38	6.78	17.58	7.38	12.38	10.18	9.78	10.48	7.38	8.28	16.98	5.98	-0.72	-1.32	1.78	7.18	14.18	-1.12	6.38	10.08	5.08
Quizartinib	-1.52	0.98	14.08	5.48	-1.02	-0.32	-1.52	17.78	-1.52	4.08	-0.02	7.58	4.78	2.38	-1.52	-1.52	-1.02	-1.32	1.38	0.68	2.08	-1.52	20.68	0.38	-1.52
Rabusertib	-0.74	-0.74	0.46	4.26	1.96	-0.74	1.36	-0.74	-0.74	9.26	-0.04	1.66	0.16	0.66	-0.74	0.16	-0.74	-0.74	1.16	-0.74	2.06	0.06	1.26	-0.74	-0.74
Radotinib	1.8	5.7	3.7	13.2	0	1.8	0	0	0	5.1	9.2	10.3	13.8	10.1	0	0	0	0	0.9	5.1	9.4	0	0	36.2	22
Ralimetinib	-0.84	5.66	8.56	4.06	7.86	4.16	2.26	0.86	1.56	5.06	8.76	4.26	4.76	1.46	-0.84	-0.84	-0.84	-0.84	-0.24	4.66	11.46	2.36	1.76	7.36	-0.74
Raloxifene	-2.28	-0.28	-0.38	-2.28	3.92	0.42	-1.68	-2.28	-2.28	-1.28	-0.68	0.52	-0.38	0.22	-2.28	-2.28	-2.28	-2.28	-0.88	1.82	0.02	4.62	1.62	-2.18	-1.88
Raltitrexed	20.72	25.82	23.02	25.72	4.82	2.12	8.22	18.12	15.82	23.02	15.22	28.42	19.32	19.62	9.92	16.12	12.82	9.12	23.02	25.32	29.22	24.32	23.92	28.02	-0.68
Ravoxertinib	4.9	1.5	3.6	10.2	7.7	-0.2	3.4	5.2	4.2	6	5.3	13.6	7	8.4	9.7	11	10	-1.6	4	3.5	4.5	1.2	0.7	12.6	3.2
Regorafenib	8.54	7.94	7.14	1.84	6.74	5.94	1.24	7.34	10.04	0.94	2.04	10.94	6.74	1.64	-1.56	2.74	3.24	1.54	4.04	4.04	10.94	4.44	10.04	9.14	2.74
Resatorvid	0	0	0	0	0	0	0.4	0	0	0	0	0.2	0	0	0	0	0	0	0	0	0	0	0	0	0
Resiquimod	-4.62	-4.62	-4.92	5.68	-4.92	-4.42	-4.32	-2.72	-4.92	-2.32	-4.92	-4.92	-4.12	-4.92	-4.82	-4.92	-4.92	-4.92	-4.42	-2.82	-4.92	-4.92	-4.92	-1.22	-4.92
Resminostat	7.44	7.74	6.34	12.24	6.04	2.04	10.24	5.94	11.74	7.74	10.24	10.14	4.54	8.14	11.74	7.04	-4.46	0.24	1.34	7.94	12.24	2.04	8.64	9.74	0.34
RGFP966	12.94	13.24	3.64	17.54	4.84	2.34	6.84	9.44	8.24	14.34	13.54	11.54	12.24	7.84	12.34	2.94	12.24	6.24	13.34	14.04	14.84	17.14	18.74	18.04	8.54
Ribociclib	-2.02	8.18	0.98	2.18	0.18	-2.02	4.58	0.08	-0.92	6.28	6.38	1.68	4.18	3.68	3.18	-1.42	-1.62	1.48	1.18	6.58	8.08	-0.42	2.28	1.58	0.78
Ridaforolimus	24.46	12.46	2.66	4.76	-2.14	-4.84	4.66	-4.84	8.66	10.26	6.96	22.16	4.46	-2.24	3.96	-4.44	-4.44	-0.04	-4.84	4.36	18.86	6.96	5.66	8.96	-4.84
Rigosertib	14.26	16.96	11.16	4.96	4.16	6.76	14.16	11.96	14.56	18.36	18.26	18.36	16.56	15.16	13.36	8.26	16.46	12.76	16.06	16.86	17.26	13.96	17.26	14.56	8.16
Ripasudil	3.28	2.68	-0.22	1.18	-0.22	-0.22	-0.22	-0.22	-0.22	-0.22	-0.22	0.88	-0.22	-0.02	-0.22	0.18	-0.22	-0.22	-0.22	-0.22	-0.22	-0.22	-0.22	4.88	0.98
RO5126766	-1.18	0.02	-1.18	-1.18	0.02	1.12	-1.18	-1.18	1.12	-0.48	0.02	2.42	-0.18	1.32	-1.18	1.02	2.22	0.72	-0.88	-1.18	0.42	-0.38	1.82	10.12	-1.18
Rociletinib	-0.16	3.54	10.34	0.24	5.84	5.24	5.24	6.94	-2.46	3.74	5.14	1.14	3.94	1.94	-1.06	2.14	3.14	4.04	4.94	4.24	2.54	0.84	6.34	1.44	-2.06
Rocilinostat	8.54	5.84	5.84	8.24	4.84	3.74	8.14	4.24	10.24	10.94	6.64	13.84	8.24	11.24	14.54	3.74	-0.66	3.34	4.84	5.04	9.24	6.04	4.74	5.64	0.04
Romidepsin	8.56	3.16	6.96	1.16	-0.54	-0.94	8.76	1.86	5.06	0.76	3.16	3.16	1.76	6.76	9.76	3.06	2.06	0.76	2.66	1.66	2.36	1.26	3.96	4.16	3.46
Roxadustat	7.48	-0.92	-0.82	2.28	-1.12	-1.12	-1.12	-1.12	-0.92	9.48	-0.82	-0.92	-1.12	-1.12	-1.12	-1.12	-1.12	-1.12	-1.12	-1.12	-1.12	-1.12	-1.12	-1.12	-1.12
RSL3	14.2	0	0	0	3.8	0	0	0.3	0	0	0	0	0	0.1	0.7	0	5.2	0	1.5	2.7	4.5	3.1	0	0	0
Ruboxistaurin	3.96	2.36	6.86	-1.04	1.26	0.76	0.96	1.96	-3.34	0.46	1.36	0.86	0.16	3.66	-4.24	1.46	-3.04	-3.74	-2.64	0.46	1.06	-0.54	0.66	0.06	0.46
Rucaparib	11.52	6.42	-0.58	6.32	0.92	0.92	2.42	1.12	3.02	0.82	2.72	5.12	0.32	9.02	13.82	5.92	-0.58	-0.58	0.62	0.42	1.02	1.52	2.72	5.42	-0.38
Ruxolitinib	-13.38	-8.58	-8.58	-10.48	-5.18	-12.48	-12.58	-8.08	-13.38	-10.68	-6.18	0.22	-12.88	-4.48	-13.38	-0.78	-13.38	-11.98	-12.78	-5.38	-4.08	-13.38	-13.38	-4.28	-12.48
S-63845	0.86	-0.84	-7.74	15.76	4.66	-4.54	6.06	-2.64	-4.34	4.96	-1.84	13.36	-0.54	-6.04	1.56	-4.64	-7.74	-4.64	-3.44	1.26	-6.54	-6.84	-6.44	6.36	-7.74
Sabutoclax	14.08	15.88	12.18	10.78	15.58	15.68	15.28	5.18	11.28	16.48	14.88	17.88	13.78	-7.82	-8.12	-7.22	-8.22	6.78	14.28	15.88	16.78	17.48	10.38	15.98	-7.42
Salinomycin	2.6	-0.9	-13.2	-0.8	-3.1	3.2	-4	1.8	-23.2	0.4	-11.4	-8.4	-10.9	10.8	-3.3	8.5	2.2	0.3	-4.9	-7.8	-15.4	-13	-5.8	-11.1	1.1
Sapanisertib	10.38	10.78	9.28	2.28	4.68	-1.82	6.48	-0.02	13.38	8.28	9.88	14.98	3.78	4.78	-3.62	1.98	-2.32	1.28	3.58	11.18	21.98	7.48	5.48	9.28	1.48
Sapitinib	0	0	0	0	0	0	0	0	0	0	0	0	0	0	0.1	0	0	0	0	0	0	0	0	0	0
SAR405838	14.26	11.16	-1.84	13.86	8.46	6.46	13.36	12.46	11.66	18.96	16.36	12.86	12.36	13.16	16.86	8.96	-7.64	-3.54	6.26	12.36	12.36	3.56	-1.94	20.36	9.16
Saracatinib	-2.02	4.28	-0.02	12.78	0.48	-2.02	8.68	1.48	1.78	2.48	2.98	2.38	2.98	-0.52	0.08	-2.02	-2.02	-2.02	-1.22	5.58	7.28	-2.02	0.08	16.98	0.58
Saridegib	-0.96	1.24	1.74	-0.06	-0.96	5.34	0.94	-1.16	5.04	-1.16	-0.06	-1.16	0.54	3.14	0.34	3.14	-0.26	0.04	-1.16	-0.66	6.64	-1.16	-1.16	0.64	1.74
SB743921	1.46	1.36	-0.24	12.96	-2.64	-2.24	3.06	1.96	3.56	15.86	4.16	3.46	2.86	9.46	-2.44	6.96	6.06	5.76	3.56	4.06	1.96	4.26	5.66	4.26	11.86
SCH772984	1.66	0.66	3.76	2.16	6.26	-0.14	1.76	-0.74	6.16	5.06	0.36	12.86	4.26	1.26	7.16	3.96	-4.14	-4.24	4.76	-3.74	-0.44	4.86	-2.64	12.56	-0.34
Seliciclib	-1.04	1.16	-1.04	1.66	2.46	-1.04	-1.04	0.86	-1.04	-0.44	-0.44	4.26	1.06	1.26	-1.04	0.16	-0.74	-1.04	-1.04	-0.14	2.16	-0.14	-0.04	3.26	-1.04
Selinexor	18.08	12.38	13.48	9.68	11.88	5.78	11.68	3.78	16.68	8.58	7.98	17.08	7.78	7.48	24.48	5.18	2.98	0.48	12.98	9.28	13.68	10.28	5.38	16.28	0.38
Selonsertib	1	0.3	0	0	0	0	0	0	0	0	1.2	0	0	11.5	0	0.2	0	0	0	0.9	0.5	0	0	0	6.7
Selumetinib	9.6	-1	-2.8	-1.8	4.7	-3	-2.3	-3.5	7.5	-1.2	2.2	7	0.7	8.5	15.4	4.2	-4.1	-1.3	5	-2.1	-3.7	-4.1	-0.3	5.4	3.1
Senexin_B	-0.6	2.1	-0.6	-0.6	-0.6	1	-0.4	4.5	-0.6	4.6	-0.6	-0.6	-0.6	-0.1	-0.1	-0.6	-0.6	-0.6	0.9	0.4	2	-0.6	-0.6	2.8	-0.6
Sepantronium_bromide	22.04	22.84	4.44	4.64	15.54	-11.66	22.84	18.64	19.54	6.94	16.24	22.84	22.34	22.84	22.34	19.44	16.24	22.24	22.34	22.84	17.94	17.84	13.34	22.34	20.54
Serabelisib	-0.44	2.96	4.96	-0.44	4.06	-1.54	-0.14	-1.54	2.96	2.26	2.56	2.56	0.86	3.06	-1.54	0.46	-0.64	-1.44	-1.44	1.46	6.56	0.76	1.56	1.26	-1.54
SGC0946	-1.12	-0.02	1.58	-1.12	1.88	-0.82	-0.62	-0.12	-1.12	-1.12	0.28	-0.72	-1.02	2.18	-1.12	-1.12	5.58	-0.62	-0.82	2.58	-0.82	5.18	-0.72	-0.62	3.98
SGC-CBP30	0.38	2.48	4.38	16.38	9.88	5.38	7.78	4.78	-2.12	8.98	5.58	6.18	7.48	5.88	9.48	1.68	-0.62	0.48	0.08	1.88	7.88	-0.02	6.48	6.28	-2.62
SGI-1776	-2.38	-0.68	7.02	-1.28	1.72	0.82	-2.48	4.82	0.62	-0.38	-1.68	-0.78	-1.08	1.22	-3.98	0.32	-2.18	-1.38	-3.08	0.12	0.62	-2.78	6.92	-0.88	-0.98
SH-4-54	6.06	-2.64	-6.04	-3.04	-0.54	-5.34	-2.14	-3.64	-2.84	-3.24	-6.14	-1.94	-3.34	-7.24	-0.84	-5.44	-6.84	-5.04	-3.34	-5.24	-2.24	-5.04	-6.14	-5.94	-5.94
Silmitasertib	7.7	3.5	1.9	15.8	6.3	2.3	0.2	3.8	-1.4	6.9	3.3	11.4	3.9	6.6	-1.4	2.2	2.2	-1.4	4	1.8	0.8	4.8	1.4	3	-2.2
Simvastatin	4.88	-0.22	-0.72	0.68	3.48	-0.72	0.08	-0.72	-0.72	0.88	4.18	4.48	2.18	9.58	6.08	2.58	3.48	-0.72	0.08	1.28	2.18	0.88	1.58	-0.72	5.78
Sirolimus	17.44	6.34	0.14	5.94	-0.66	-3.76	0.04	-3.76	2.84	6.74	4.74	17.94	1.74	0.84	5.74	-0.76	-3.66	-2.26	-2.86	1.34	11.14	0.54	1.34	5.04	-3.56
Sitravatinib	2.18	1.58	14.78	-0.32	2.58	3.08	1.78	19.98	-0.42	-0.42	3.58	8.08	1.28	6.78	-0.42	5.48	9.38	2.78	-0.12	5.78	7.38	2.88	26.18	8.68	10.98
SN-38	26.98	22.68	19.48	26.68	14.68	13.78	21.08	18.88	18.78	27.28	23.48	27.98	27.08	25.18	16.18	19.68	24.38	13.38	22.08	24.58	27.58	27.18	25.38	26.88	18.28
SNS-032	-6.64	-2.64	-6.74	-2.24	0.16	-2.04	3.06	-2.64	-5.44	1.66	-0.54	-2.54	-3.24	2.96	-4.44	-1.04	-4.94	-6.04	-2.44	-0.34	1.26	-5.44	-3.24	-3.14	-4.54
Sonidegib	-3.92	1.28	3.98	4.98	-3.92	-0.02	-3.92	1.38	-1.42	-0.12	1.48	10.48	1.08	7.48	-3.92	2.28	7.58	-3.92	0.98	5.68	5.78	0.98	-3.92	1.68	-3.92
Sonolisib	-0.56	0.24	2.44	4.24	0.94	-0.66	-0.76	-0.76	-0.76	0.64	0.14	-0.16	-0.56	0.34	-0.76	-0.06	-0.76	-0.56	-0.56	-0.16	2.14	-0.76	-0.76	-0.76	-0.76
Sorafenib	0	1.7	5.5	0	0	0	0	12.2	0	0	0	2	0	0.3	0	0	0	0	0.2	2.2	1.4	0.2	15.1	0	0
Sotrastaurin	4.5	8	5	4.7	5.7	0.2	5.2	7.7	2.8	-1.4	0.5	6.4	1.7	9.9	5.8	4.2	1.9	1.8	0.8	3.1	3.4	4.8	6.7	2.2	2.9
Spebrutinib	-0.16	1.94	4.14	-0.06	0.64	-0.16	0.84	3.64	-0.16	-0.16	4.84	-0.16	0.54	5.84	2.34	3.24	6.34	-0.16	2.04	4.64	4.14	-0.16	3.74	0.04	-0.16
StemRegenin_1	-1.8	-0.5	1.9	-1.8	-0.1	-1.8	-1.8	-1.8	-1.8	4.4	-0.5	0.1	-0.1	2.5	-1.8	-1.8	-1.4	-1.8	1.1	2.2	-0.6	1.8	-0.5	-0.2	-1.8
Sunitinib	-1.44	1.16	14.16	-1.34	5.66	-0.34	-1.44	10.36	-1.44	-1.44	0.66	-1.44	-0.84	1.86	-1.44	2.06	-1.44	-1.04	-1.44	0.76	1.46	-1.44	15.26	6.86	3.26
Tacedinaline	12.18	1.88	-0.02	1.98	-0.02	-0.02	0.38	0.98	-0.02	-0.02	4.38	15.48	1.18	7.68	1.58	9.18	-0.02	-0.02	-0.02	2.58	0.48	-0.02	4.08	4.58	10.58
Tacrolimus	1.88	2.88	2.08	12.68	3.18	3.08	-0.72	-0.72	-0.72	13.58	12.08	4.68	21.08	24.58	33.88	-0.12	0.48	12.48	0.98	16.08	10.68	2.68	7.88	18.28	13.48
TAK-285	0	0	0	0	0	0	0	0	0	0	3.3	0	0	1.6	0	0	0.1	0	0	0	0	0.1	0	0	3.1
TAK-530	-0.08	-0.08	-0.08	-0.08	1.42	0.12	2.22	-0.08	-0.08	1.02	-0.08	-0.08	-0.08	-0.08	-0.08	-0.08	-0.08	-0.08	-0.08	-0.08	-0.08	-0.08	-0.08	3.12	-0.08
TAK-901	10.36	12.76	7.76	10.46	6.16	3.66	8.96	9.76	7.56	12.16	10.76	10.76	10.76	7.26	6.66	3.16	11.76	0.16	9.66	12.76	10.66	11.06	9.36	10.96	7.16
Taladegib	4.08	1.88	-0.52	5.78	1.48	2.08	-1.12	-1.12	10.98	10.38	-1.12	6.68	4.58	3.18	-0.32	-1.12	-1.12	0.88	2.68	-0.02	-0.52	3.58	-1.12	3.78	-1.02
Talazoparib	21.38	15.78	4.78	21.28	8.28	-0.62	11.08	3.38	13.18	14.48	8.98	27.48	3.18	9.48	20.28	10.18	8.78	-2.82	3.78	9.68	10.68	-3.72	0.78	20.08	-1.52
Talmapimod	0	1	3.2	0	0	0.7	0	0	0	4.5	0	0	0	0	0	0	0	0	0	0.2	4.9	2.8	0.4	2.8	0
Tamatinib	-5.42	1.28	9.98	-0.72	-1.52	-5.42	-1.22	8.58	-5.42	-1.12	2.68	-2.12	1.28	-4.92	-5.42	-4.62	-3.82	-1.42	-5.42	4.38	13.98	-2.22	11.98	-0.62	-5.42
Tamoxifen	0.02	1.62	2.72	5.42	1.82	2.32	1.22	-3.28	5.72	9.32	1.52	7.92	4.12	0.82	-2.48	0.52	3.82	-3.18	0.42	3.32	4.42	1.02	-1.28	3.02	-0.48
Tandutinib	0	0	3.1	0	0	0.3	0	4.5	0	0	0	0	0	0	0	0	0	0.8	0	0	0	0	4.2	0.5	0
Tanzisertib	0	0	1.9	0	0.8	0	0	0	0	5.6	0	1.4	0	0.9	0	0.2	0	1.2	0	0	0	0	0	0	0
Tarenflurbil	-0.16	-0.16	-0.16	-0.16	-0.16	-0.16	-0.16	-0.16	-0.16	7.34	6.84	-0.16	0.64	-0.16	-0.16	-0.16	4.34	0.04	3.44	-0.16	-0.16	-0.06	-0.16	0.44	3.64
Taselisib	7.4	3.9	13.2	4.1	11.9	-2.7	10.9	1.7	4	0.7	6.3	-0.9	-2.2	6.9	-4.3	7.9	-1.7	4.2	9.5	12.2	22.1	5.7	5.2	-1.4	-4.3
Tasquinimod	-0.42	-0.42	-0.32	16.58	-0.42	-0.42	-0.42	-0.42	-0.42	4.98	-0.42	-0.42	-0.42	0.88	-0.42	0.68	-0.42	-0.42	-0.42	-0.42	-0.42	-0.42	-0.42	2.78	-0.42
Tazemetostat	-0.08	0.32	0.32	-0.08	-0.08	-0.08	-0.08	-0.08	-0.08	-0.08	0.92	-0.08	-0.08	6.72	-0.08	-0.08	8.22	-0.08	-0.08	0.42	-0.08	-0.08	2.42	-0.08	-0.08
Telatinib	0	1.6	0	0	0	0	0	0	0	0	1	0.9	0.7	0.4	0	0	0	0	0	2.9	0.2	2.6	0.2	0	0.9
Temozolomide	5.66	3.76	-0.04	-0.04	-0.04	-0.04	-0.04	-0.04	-0.04	1.26	6.16	-0.04	-0.04	3.36	4.76	-0.04	-0.04	-0.04	2.26	3.36	6.66	6.66	6.46	-0.04	-0.04
Temsirolimus	25.46	14.86	2.56	4.66	-2.54	-5.04	4.66	-5.04	6.46	10.46	9.06	21.86	3.46	-0.34	7.36	-3.54	-5.04	0.16	-2.34	6.36	20.76	3.96	1.36	9.86	-5.04
Teniposide	0	0	0	0	0	0	0.1	0	2.4	0	0	0	0	0	0	0	0	0	0	0	0	0	0	0	0
Tepotinib	-0.08	-0.08	-0.08	2.22	-0.08	-0.08	-0.08	-0.08	2.02	-0.08	-0.08	-0.08	4.62	-0.08	-0.08	-0.08	-0.08	-0.08	-0.08	-0.08	0.42	-0.08	0.22	-0.08	-0.08
Tesevatinib	-0.96	-0.66	2.34	-1.36	2.04	-0.36	1.64	-1.06	-1.36	-1.36	0.74	-0.86	-1.16	1.44	3.64	2.34	-0.06	-1.36	-0.16	0.94	0.64	-1.36	1.44	-1.36	3.24
TG100-115	2.1	0.7	-0.2	0.6	3.7	-0.4	-0.4	0.1	-0.4	0.5	1.6	2.7	0.1	5.2	-0.4	-0.4	4.6	0.5	-0.4	3.6	5.6	5.1	0.7	-0.3	3
TGR-1202	-2.56	0.44	3.84	1.64	5.14	-1.46	-1.96	-2.56	-2.36	1.14	1.44	4.54	-1.76	-0.06	-2.56	-0.06	1.24	2.24	-1.16	5.14	9.14	-1.76	-2.56	1.14	-2.56
TGX-221	-1.64	0.16	1.16	-1.64	2.96	-1.24	1.76	-1.64	-1.64	10.86	1.16	-1.64	-1.64	5.16	-1.64	-1.44	-0.44	-1.64	3.56	3.36	13.46	-0.84	5.46	0.36	-1.64
TH588	-0.58	8.72	10.52	3.82	2.42	-0.58	3.72	6.22	-0.58	8.82	7.92	7.22	8.72	-0.58	-0.58	-0.58	-0.28	5.32	-0.58	4.02	3.52	5.82	8.62	7.62	-0.28
Thalidomide	-0.14	-0.14	-0.14	-0.14	0.16	-0.14	-0.14	-0.14	-0.14	2.66	-0.14	-0.14	-0.14	-0.14	-0.14	-0.14	-0.14	-0.14	-0.14	-0.14	-0.14	-0.04	-0.14	-0.14	-0.14
Thioguanine	6.04	8.84	11.24	18.64	4.04	2.44	6.34	5.24	2.54	16.24	11.24	13.24	12.44	11.94	-1.36	4.34	8.64	7.74	10.24	11.64	14.34	10.84	13.04	19.24	-3.46
THZ2	2.72	-6.48	5.12	-3.48	5.12	3.12	4.62	9.42	-10.28	-2.58	1.92	0.12	-1.88	2.02	-5.48	-0.58	-6.48	-7.38	-10.08	-0.48	-0.48	-0.58	8.12	0.52	1.22
TIC10	-1.02	2.58	-3.92	-2.12	-0.82	-0.12	1.08	-5.32	-6.62	3.28	-1.92	4.18	-2.02	7.68	0.48	-2.72	-0.12	-4.62	-2.22	-0.22	-0.42	0.58	2.08	-1.52	5.18
Tideglusib	-0.3	-0.3	-0.3	-0.3	-0.3	-0.3	-0.3	0.3	-0.3	0.8	-0.3	-0.3	-0.3	0.5	-0.3	0.9	-0.3	-0.3	-0.3	-0.3	-0.3	0.4	-0.3	-0.3	-0.3
Tipifarnib	9.2	6.9	9	8.2	4.5	-1.1	6.6	3	-1.3	7	3.1	11.2	1.6	7.8	7	6.6	1.4	9.9	10.6	3.5	6.9	14	18.6	8.9	6.8
Tirabrutinib	1.2	0	0	3.7	0	0	5.2	0	2.9	0	0	4.1	0.7	0	1.7	1.5	3.7	0	0	0	11	0	1.1	14.7	1
Tivantinib	6.18	5.18	2.08	3.58	0.18	-0.42	2.38	1.98	0.68	5.58	5.38	3.08	4.08	8.48	0.78	4.88	4.78	4.28	5.08	6.58	4.28	7.78	7.18	2.88	5.38
Tivozanib	-3.64	5.16	1.76	12.56	-1.04	1.46	3.96	2.96	4.96	5.26	2.46	9.06	5.96	-0.34	-3.64	-2.44	-1.74	-3.44	2.36	4.56	10.86	0.36	4.76	21.66	5.66
Tofacitinib	-7.86	-6.86	-7.86	-7.86	0.44	-7.86	-7.86	-7.86	-7.86	-7.86	-7.86	-7.66	-7.86	-7.86	-7.86	-4.96	-7.86	-7.86	-7.86	-6.66	-7.86	-7.66	-7.86	-7.86	-7.86
Topotecan	27.08	18.88	17.88	18.58	10.88	11.38	17.68	17.98	14.68	20.18	18.18	23.38	21.68	26.58	12.18	16.48	20.38	7.18	17.08	18.88	19.48	22.18	20.28	22.38	14.28
Toremifene	1.58	0.28	3.18	3.48	2.28	0.58	-2.72	-5.42	5.68	2.68	0.58	0.98	1.08	9.68	-2.52	0.48	8.98	-0.82	1.68	0.58	6.88	-1.52	0.48	2.58	0.78
Tosedostat	5.76	-1.54	6.96	3.96	11.36	1.26	-0.74	7.06	-5.44	3.16	2.56	10.76	2.26	5.76	15.26	1.26	0.86	3.06	-1.04	4.96	2.16	-0.64	0.86	10.96	0.46
Tozasertib	19.16	23.16	17.26	19.16	2.96	3.36	15.36	15.56	12.26	23.26	18.36	19.06	20.56	10.96	9.66	4.66	19.76	-0.34	16.16	22.16	17.86	21.16	22.26	19.06	14.76
TRAM-34	-0.08	-0.08	-0.08	-0.08	-0.08	-0.08	-0.08	-0.08	-0.08	-0.08	2.52	-0.08	-0.08	1.12	-0.08	-0.08	-0.08	-0.08	-0.08	1.12	-0.08	0.22	-0.08	-0.08	-0.08
Trametinib	3.56	-2.64	-1.44	-0.74	5.06	-4.34	-2.54	-5.34	5.86	3.36	-1.14	4.36	2.46	2.96	9.46	0.06	-4.84	-1.24	2.86	-8.04	-8.04	-8.04	-8.04	13.56	0.16
Tretinoin	1.7	-1.1	-2.3	-2.4	-1	-2.4	-2.4	-1.8	-2.4	-2.4	3.4	0.4	-2.4	-1.7	-1.2	-2.4	-2.4	-2.4	-2.4	-2.4	-2.4	-1.8	0	-2.4	-2.4
Triapine	5.88	5.88	2.28	10.58	1.08	0.88	9.28	6.88	2.38	8.48	3.98	1.78	1.78	3.48	2.08	2.18	3.48	2.68	4.48	2.88	7.38	3.88	2.18	2.48	2.28
Triciribine	25.24	9.44	12.94	16.34	-7.56	4.34	16.04	24.24	-4.66	15.44	15.34	21.44	15.94	17.04	15.04	8.04	11.24	4.74	8.04	12.84	16.84	-1.26	17.54	12.84	7.64
Trifluridine	13.96	17.86	19.96	20.16	0.06	2.66	8.26	6.36	10.26	15.66	6.56	17.36	15.96	9.96	6.56	2.26	9.76	4.06	14.96	11.86	15.16	15.26	14.46	15.36	-1.84
Tubacin	20.44	8.54	5.74	15.94	7.14	5.44	5.04	4.54	4.14	4.84	6.54	16.94	7.14	7.74	17.84	7.84	7.54	7.14	9.94	7.44	11.24	7.44	9.44	16.54	12.94
Tubastatin_A	11.66	4.46	3.06	8.86	3.16	-0.14	7.46	2.46	7.06	6.46	8.86	9.86	6.76	3.76	17.96	-0.14	8.76	-0.14	1.36	6.96	8.16	5.86	4.76	3.46	-0.14
Tucatinib	-0.08	-0.08	1.12	3.82	0.02	0.02	0.52	-0.08	0.22	1.42	-0.08	0.22	4.02	0.22	-0.08	0.22	-0.08	0.52	-0.08	-0.08	2.22	0.22	-0.08	-0.08	-0.08
Tucidinostat	12.54	6.34	2.94	12.04	0.64	-3.86	5.34	3.04	8.84	7.94	7.24	12.44	3.94	9.14	11.44	9.94	-2.76	-0.36	-0.36	4.04	11.14	3.34	10.34	5.34	4.14
UCN-01	13.54	12.94	8.64	6.64	4.34	-1.46	8.94	6.94	2.84	10.04	9.34	10.64	1.54	7.94	6.24	8.14	0.94	0.74	4.94	7.74	18.04	5.24	7.74	2.64	-0.36
Ulixertinib	-4.38	1.62	6.72	-0.78	3.82	-0.18	-0.38	-3.08	7.82	1.12	1.82	5.42	0.32	2.72	-4.38	2.22	3.92	3.22	0.12	-0.18	2.82	-1.08	1.62	6.62	2.12
UM729	5.74	1.64	2.54	-0.06	1.44	4.34	6.34	2.74	-0.06	1.14	2.44	2.84	1.54	-0.06	0.54	0.44	-0.06	0.44	0.34	1.44	3.24	0.24	2.14	2.24	-0.06
UNC0638	0.06	-0.84	-1.74	8.26	1.86	0.16	1.16	-3.34	-4.34	-0.34	-1.64	-4.44	-2.84	-2.84	0.86	-3.94	-5.14	-3.04	-3.64	0.86	0.66	-0.24	-2.94	-1.04	-4.84
UNC0642	0.86	0.76	2.96	-1.44	4.36	2.76	2.66	-1.64	-0.84	-1.94	0.76	-0.74	-1.14	0.96	-1.64	1.46	-0.74	-3.74	-2.24	2.06	2.56	-0.14	-0.14	3.36	-0.84
UNC1215	0	0	0	0	0	0	0	0	0	0.9	0	0	0	0	0	0	0	0	0	0	0	0.5	0	0	0
UNC2881	0	1	7.2	0	0	0	0	4.9	0	0.6	0	0.2	0	0	0	0.5	0.6	0	0	0	0.4	0.2	6.3	3.9	0.5
Upadacitinib	-0.16	-6.06	-7.16	-7.16	-7.16	-7.16	-7.16	-7.16	-6.56	-6.66	-2.76	-7.16	-5.16	-7.16	-0.46	-6.46	-7.16	-7.16	-5.96	-3.16	-7.16	-7.16	-7.16	-7.16	-7.16
Uprosertib	0.6	0.3	9	5.3	6.8	-0.6	1.7	-1.4	8.3	-1.4	0.7	9.1	-1.2	2.1	-1.4	4.6	-1.4	5.4	2.9	6.5	8.3	9.6	4.5	-1.4	1.2
URB597	2.44	-0.36	-0.46	5.14	-0.06	-0.46	-0.46	-0.46	-0.46	8.84	0.04	-0.36	0.44	0.54	-0.46	-0.46	-0.46	-0.46	2.44	-0.46	-0.46	-0.46	-0.46	0.94	-0.46
Vactosertib (TEW-7197)	0.8	-0.5	-0.5	7.2	1.2	-0.5	1.1	-0.5	-0.5	-0.5	1.4	-0.5	-0.1	-0.3	-0.5	7.2	-0.4	-0.4	-0.5	-0.4	-0.5	-0.5	4.5	9	-0.5
Valproic_acid	0	0	0	0	0	0	0	0	0	0	0	0	0	0	0	0	0	0	0	0	0	0	0	0	0
Valrubicin	12.98	8.58	-2.62	12.88	2.98	7.78	13.78	8.48	8.38	7.48	5.68	10.18	2.98	7.48	15.98	7.28	-1.82	-3.22	3.18	5.98	11.78	12.08	6.58	12.18	4.18
Vandetanib	-0.22	0.18	-0.22	-0.22	-0.22	-0.22	0.18	-0.22	-0.22	-0.22	-0.22	-0.22	-0.22	4.38	0.78	-0.22	2.28	-0.22	-0.22	0.38	-0.22	-0.22	-0.12	1.08	5.38
Varespladib	-0.84	-0.84	-0.84	-0.84	-0.84	-0.84	6.36	-0.84	-0.84	8.46	-0.84	-0.84	-0.84	-0.84	-0.84	3.56	-0.84	0.56	-0.84	-0.84	-0.84	-0.84	-0.84	-0.84	-0.84
Varlitinib	18.52	3.82	5.12	18.82	0.92	-0.18	-0.18	-0.18	-0.18	7.12	4.72	8.32	20.22	5.02	-0.18	0.82	-0.18	0.92	-0.18	4.32	5.92	7.62	2.92	6.82	3.02
Vatalanib	0	0	0	0	0	0	0	0	0	0	0	0	0	0.1	0	0.1	0	0	0	0	0	0	0	0	0
VE-821	2.54	-0.66	2.64	11.24	5.64	-0.66	0.34	2.54	-0.66	11.84	0.84	8.74	4.64	7.84	-0.06	-0.66	-0.66	-0.66	-0.66	-0.16	7.94	7.14	2.44	6.94	-0.66
Veliparib	-2.78	-1.08	-1.78	1.02	2.82	-4.18	-3.48	-1.08	2.82	1.52	1.72	5.52	-4.18	5.02	0.42	6.72	-4.18	-4.18	-2.48	4.42	-2.58	-4.18	-4.18	-1.08	-4.18
Vemurafenib	-1.14	5.16	2.46	0.36	0.86	-1.14	-1.14	-0.84	-1.14	3.36	1.66	6.56	3.56	3.56	-1.14	-0.94	-0.34	-1.14	-1.14	3.86	3.36	4.86	3.26	2.26	1.26
Venetoclax	29	10.1	30.2	28.8	31.2	4.5	14.1	29.5	22.9	29.7	25.4	28.9	31.8	28.7	31.5	14.2	20.5	22.6	4.4	21	-1.3	0.9	21.1	34.5	20.8
VER-155008	-0.98	4.72	4.82	7.52	2.22	-0.08	2.02	-0.68	-0.08	2.22	-0.58	2.02	0.32	0.52	0.32	-0.68	-0.48	-0.88	5.92	1.62	8.62	9.12	5.22	5.72	-1.38
Verdinexor	12.04	6.34	7.54	11.34	8.54	3.64	9.34	1.54	12.94	7.34	3.74	8.34	1.94	1.84	20.54	1.84	0.64	-0.36	11.74	4.34	9.04	4.44	0.34	11.24	0.14
Vesatolimod	-3.52	-3.42	-3.52	0.38	0.28	-3.32	-3.52	-3.52	-3.52	-0.02	-2.92	-3.22	-3.52	-3.52	-3.52	-3.52	-3.52	-3.52	-3.52	-3.52	-3.52	-3.52	-3.52	-3.52	-3.52
VGX-1027	-0.04	-0.04	-0.04	-0.04	-0.04	-0.04	-0.04	-0.04	-0.04	-0.04	-0.04	-0.04	-0.04	-0.04	-0.04	-0.04	-0.04	-0.04	-0.04	-0.04	-0.04	-0.04	-0.04	-0.04	-0.04
Vidofludimus	5	6	2.6	6.9	0	0	0	0.5	6.2	8.2	2.7	5.5	6.1	3	0.7	2.8	1.9	3.5	3.4	3	8.8	8.9	5.6	6	0
Vinblastine	7	12.5	7.2	19.7	-0.6	-0.1	4.6	-1	6.7	21.2	14.9	12.8	13.6	-3.2	-0.1	-5.6	-3.8	5.4	6.3	9.8	14.4	7.1	10.8	12.9	-4.9
Vincristine	14.92	17.02	8.32	16.32	1.22	3.92	13.72	4.72	8.92	16.12	15.92	15.82	16.72	5.52	4.22	-2.28	-0.88	12.32	10.72	17.42	17.22	17.52	12.72	18.52	-0.08
Vinflunine	5.98	4.68	1.68	2.98	2.68	2.38	2.78	4.08	5.68	6.28	6.78	7.08	4.48	2.88	-0.12	0.58	2.98	4.08	5.18	3.68	3.98	4.18	6.28	3.48	0.28
Vinorelbine	23.28	24.98	17.48	12.18	5.98	9.58	22.18	15.68	17.78	15.38	24.18	25.78	23.38	19.28	10.98	8.98	16.08	18.28	14.88	21.48	25.08	26.58	24.08	27.18	13.38
Vismodegib	0.76	-0.84	3.56	5.56	2.26	-1.14	-1.14	-1.14	3.96	1.06	-0.74	6.76	5.26	2.86	-1.14	0.16	1.06	-1.14	-1.14	0.36	3.46	-1.14	2.06	11.26	1.26
Vistusertib	17.12	15.12	10.02	10.62	6.12	-1.28	9.12	0.32	15.02	12.12	11.82	19.72	5.12	9.52	2.12	5.82	-3.58	2.22	3.92	11.72	24.52	9.32	4.82	10.72	3.02
VLX1570	6.88	-1.02	0.38	2.08	6.08	-1.92	5.28	1.58	-2.62	4.58	0.88	3.88	0.68	-3.32	5.98	-1.22	-4.52	-3.72	4.08	1.88	1.58	1.98	3.38	1.38	-2.62
Volasertib	15	12.1	16.1	14.9	6.4	7.7	11	8	5.7	20.3	18.5	12.4	13.4	10.6	2.9	0.9	12.3	11.3	11.9	13.1	13.9	12.8	21.4	19.2	10.1
Vorinostat	8.8	10.1	10.1	11.5	7.7	1	10.2	4.6	17.6	12.5	11.6	13.4	8.2	8.7	14.1	3.9	-3.5	1.5	2.3	10	16.5	4.5	11.3	11.9	-0.1
VS-4718	-5	0.7	14	-5	1.3	-0.4	-4.5	11.2	-5	-5	2.1	-3.1	-3	8.9	-5	6.4	8.7	0	0.4	0.4	0.8	-1.1	7.9	-3	6.8
WEHI-539	-0.02	-0.02	-0.02	5.28	7.58	2.78	6.78	3.58	-0.02	-0.02	-0.02	-0.02	-0.02	0.08	-0.02	2.18	-0.02	-0.02	1.28	-0.02	-0.02	2.18	-0.02	3.78	-0.02
XAV939	1.96	-0.14	0.06	-0.14	0.46	0.36	0.16	-0.14	1.46	-0.14	-0.14	0.66	0.56	0.26	-0.14	-0.14	-0.14	-0.14	-0.14	-0.14	0.06	-0.04	0.56	-0.14	-0.14
ZSTK474	13.66	8.46	10.46	4.86	14.36	0.86	13.56	0.96	6.76	5.26	9.86	11.86	-0.44	11.36	10.26	7.46	1.96	0.56	11.86	13.26	28.36	9.36	5.66	2.56	-1.04
