# Supplementary material for: Multi-omics molecular phenotyping of childhood acute lymphoblastic leukemia cell lines reveals novel drug vulnerabilities
Source: Research Square preprint supplement (doi:10.21203/rs.3.rs-443839/v1), 2021-04-29
Supplement: Supplementary file 2 [file 33d6fa9961e38a36caf03704.xlsx]

## Sheet: Supp_Table_5
Supplementary Table 5: DEqMS analysis table of B-lineage vs T-lineage cell lines
gene	logFC	AveExpr	t	P.Value	adj.P.Val	B	gene	count	sca.t	sca.P.Value	sca.adj.pval
CD3E	-2.03156	-0.402899	-35.2002	1.00521e-51	1.23902e-47	105.402	CD3E	35	-35.4215	3.10109e-52	3.8224e-48
CD3D	-1.93816	-0.423059	-28.4222	1.37134e-44	8.45157e-41	90.1045	CD3D	13	-28.4347	7.67157e-45	4.72799e-41
CD3G	-1.94273	-0.447575	-26.4218	3.25737e-42	1.33834e-38	84.9161	CD3G	20	-26.5064	1.54927e-42	6.36544e-39
GATA3	-2.18283	-0.528872	-24.6729	5.12311e-40	1.57869e-36	80.0843	GATA3	5	-24.6036	3.96695e-40	1.22242e-36
BCL11B	-1.87545	-0.267783	-22.0701	1.61327e-36	3.3142e-33	72.3306	BCL11B	58	-22.214	6.77833e-37	1.67099e-33
SH2D1A	-2.33774	-0.520593	-22.0718	1.60474e-36	3.3142e-33	72.3357	SH2D1A	18	-22.1514	8.29914e-37	1.70492e-33
GRAP2	-1.89302	-0.385609	-19.7058	4.46616e-33	7.86426e-30	64.641	GRAP2	12	-19.7484	2.73388e-33	4.81397e-30
UBASH3A	-1.83793	-0.402282	-18.7092	1.52484e-31	2.34939e-28	61.1997	UBASH3A	24	-18.7882	8.35154e-32	1.28676e-28
CD247	-2.64643	-0.413586	-17.4195	1.75479e-29	2.20467e-26	56.5606	CD247	11	-17.479	1.05681e-29	1.44736e-26
RIPK2	1.24122	-0.177015	17.4144	1.78864e-29	2.20467e-26	56.5419	RIPK2	15	17.4423	1.21418e-29	1.4966e-26
DOK3	1.36355	0.00511108	16.2082	1.82616e-27	1.87577e-24	52.0068	DOK3	50	16.3092	9.56436e-28	1.07173e-24
CEP85L	-1.33123	-0.256261	-16.2462	1.5746e-27	1.76441e-24	52.1523	CEP85L	9	-16.2436	1.23754e-27	1.27116e-24
TOX	-1.91697	-0.457201	-15.8983	6.17499e-27	5.85484e-24	50.8105	TOX	12	-15.946	4.01192e-27	3.80391e-24
SNX2	0.746246	-0.0444889	15.2603	7.88225e-26	6.93976e-23	48.3076	SNX2	109	15.4753	2.63863e-26	2.32313e-23
TRAT1	-1.6049	-0.372313	-14.8919	3.51133e-25	2.88537e-22	46.8379	TRAT1	8	-14.9126	2.60174e-25	2.13698e-22
ITK	-1.89411	-0.584213	-14.8685	3.86271e-25	2.97574e-22	46.7441	ITK	7	-14.8969	2.77395e-25	2.13698e-22
LCK	-1.4551	0.058796	-14.7662	5.86868e-25	4.25514e-22	46.3324	LCK	98	-14.865	3.16251e-25	2.29301e-22
CD19	1.58611	-0.188892	14.5668	1.33107e-24	9.11489e-22	45.5263	CD19	40	14.6424	7.91729e-25	5.42158e-22
THEMIS	-1.9356	-0.567462	-14.4857	1.86045e-24	1.17752e-21	45.1966	THEMIS	41	-14.5577	1.12481e-24	7.29706e-22
IRX5	-1.49657	-0.153048	-14.4792	1.91063e-24	1.17752e-21	45.1704	IRX5	2	-14.3964	2.19938e-24	1.35548e-21
UNC93B1	1.65008	0.0384144	14.3226	3.65477e-24	2.14518e-21	44.5316	UNC93B1	10	14.357	2.59152e-24	1.5211e-21
PRKCE	1.58719	-0.233951	14.2249	5.48655e-24	2.94032e-21	44.1314	PRKCE	43	14.2997	3.2932e-24	1.84509e-21
ZNF296	1.41541	-0.184883	14.2779	4.40034e-24	2.46539e-21	44.3487	ZNF296	4	14.2424	4.18432e-24	2.24243e-21
TFEB	1.25235	-0.105886	14.0933	9.49969e-24	4.87888e-21	43.5906	TFEB	22	14.1482	6.21029e-24	3.1895e-21
MEF2D	1.05146	-0.299541	13.8891	2.23533e-23	1.10211e-20	42.7473	MEF2D	26	13.9502	1.43021e-23	7.0515e-21
HDAC5	0.846576	-0.037717	13.6858	5.2682e-23	2.49753e-20	41.9023	HDAC5	25	13.7422	3.45112e-23	1.63609e-20
ZEB2	1.51279	-0.0362866	13.5623	8.89206e-23	4.05939e-20	41.3861	ZEB2	73	13.6425	5.27448e-23	2.4079e-20
ETS1	-1.31174	-0.319644	-13.5336	1.00456e-22	4.42222e-20	41.2659	ETS1	26	-13.5934	6.50359e-23	2.86298e-20
BTK	1.55314	-0.146266	13.376	1.96519e-22	8.35272e-20	40.6041	BTK	88	13.4559	1.17073e-22	4.97599e-20
PARP1	0.874254	-0.0385336	13.2799	2.96211e-22	1.16272e-19	40.1994	PARP1	828	13.4432	1.23612e-22	5.0788e-20
TNRC6C	-1.0314	-0.230798	-13.3632	2.07512e-22	8.526e-20	40.5504	TNRC6C	15	-13.3902	1.55145e-22	6.16877e-20
CD74	1.55363	0.00948281	13.2755	3.01859e-22	1.16272e-19	40.1808	CD74	61	13.3498	1.84513e-22	7.10722e-20
USP20	-0.715135	-0.045465	-13.0159	9.20416e-22	3.43789e-19	39.0809	USP20	19	-13.039	7.05529e-22	2.63526e-19
TMEM62	1.32967	-0.252763	12.9978	9.95315e-22	3.60831e-19	39.0037	TMEM62	3	12.9515	1.03103e-21	3.7378e-19
EPHB6	-1.67838	-0.542887	-12.8694	1.73324e-21	6.10397e-19	38.4564	EPHB6	4	-12.8749	1.43876e-21	5.06688e-19
CABIN1	-0.348538	0.0261206	-12.4616	1.0216e-20	2.84739e-18	36.7053	CABIN1	80	-12.835	1.71142e-21	5.85971e-19
VCL	1.08613	0.0498876	12.7006	3.60314e-21	1.13878e-18	37.7341	VCL	265	12.8087	1.91924e-21	6.39366e-19
PAX5	0.978968	-0.0915965	12.7153	3.38045e-21	1.12615e-18	37.7971	PAX5	32	12.7811	2.16512e-21	6.89299e-19
PRKCQ	-1.31408	-0.119145	-12.7061	3.51814e-21	1.13878e-18	37.7577	PRKCQ	55	-12.7794	2.18097e-21	6.89299e-19
JAM3	-1.9319	-0.124072	-12.7378	3.06561e-21	1.04963e-18	37.8936	JAM3	5	-12.7629	2.34413e-21	7.22343e-19
SCARB1	1.42724	-0.396781	12.6716	4.08647e-21	1.25924e-18	37.6099	SCARB1	11	12.7042	3.02979e-21	9.10857e-19
CD22	1.653	-0.174254	12.5293	7.5988e-21	2.23007e-18	36.9975	CD22	38	12.5907	4.97828e-21	1.46101e-18
TCF7	-1.88499	-0.458796	-12.53	7.57546e-21	2.23007e-18	37.0006	TCF7	12	-12.5741	5.35399e-21	1.53473e-18
CD5	-1.77931	-0.484096	-12.5036	8.49977e-21	2.43647e-18	36.8869	CD5	15	-12.5504	5.94076e-21	1.66422e-18
PLS1	-1.22888	-0.00077077	-12.4576	1.03953e-20	2.84739e-18	36.6882	PLS1	88	-12.5393	6.23764e-21	1.70856e-18
ECI1	1.19613	-0.17035	12.3866	1.41839e-20	3.80066e-18	36.3813	ECI1	50	12.4584	8.8993e-21	2.38463e-18
EBF1	1.4114	-0.253466	12.3531	1.64258e-20	4.30775e-18	36.2365	EBF1	16	12.3961	1.17069e-20	3.07019e-18
NCF4	1.51745	-0.166195	12.2425	2.66948e-20	6.85501e-18	35.757	NCF4	58	12.3089	1.71984e-20	4.41641e-18
TST	1.09334	-0.016517	12.1231	4.51595e-20	1.10563e-17	35.2378	TST	47	12.1943	2.85509e-20	7.10307e-18
MAGED2	-0.575312	-0.000996695	-12.0451	6.37269e-20	1.48104e-17	34.8977	MAGED2	70	-12.1922	2.88134e-20	7.10307e-18
LRRK1	1.0892	-0.0863974	12.133	4.3221e-20	1.08723e-17	35.2811	LRRK1	21	12.1788	3.05784e-20	7.39037e-18
TLR1	1.4891	-0.0676466	12.1202	4.57464e-20	1.10563e-17	35.225	TLR1	7	12.141	3.61468e-20	8.56817e-18
ZMYND8	0.546619	0.067413	11.9408	1.01049e-19	2.22417e-17	34.4423	ZMYND8	98	12.119	3.98569e-20	9.26937e-18
SCPEP1	1.03207	0.10809	12.041	6.48841e-20	1.48104e-17	34.8799	SCPEP1	46	12.1129	4.09458e-20	9.34626e-18
PRDX1	1.217	0.0431092	11.9884	8.18794e-20	1.83499e-17	34.6501	PRDX1	498	12.0795	4.7486e-20	1.0642e-17
MKRN3	-1.83287	-0.256718	-12.0563	6.06421e-20	1.43745e-17	34.9467	MKRN3	1	-12.0275	5.98144e-20	1.31656e-17
ATP8A1	1.19564	-0.0626013	11.9312	1.05464e-19	2.2413e-17	34.4001	ATP8A1	74	12.0061	6.57912e-20	1.4227e-17
ZC3H12D	1.31122	0.047253	11.9352	1.03584e-19	2.23995e-17	34.4179	ZC3H12D	25	11.9872	7.15701e-20	1.52099e-17
CD79B	1.84512	-0.765866	11.9133	1.1417e-19	2.38518e-17	34.3218	CD79B	9	11.9509	8.40985e-20	1.75246e-17
RAP1GDS1	-0.784977	-0.129698	-11.8246	1.69228e-19	3.47651e-17	33.933	RAP1GDS1	158	-11.9477	8.53055e-20	1.75246e-17
PDLIM1	1.29251	-0.177698	11.8059	1.83844e-19	3.71486e-17	33.8512	PDLIM1	205	11.8862	1.12245e-19	2.26808e-17
GPRIN1	1.31212	-0.102832	11.6863	3.12897e-19	6.12185e-17	33.3259	GPRIN1	29	11.7404	2.15187e-19	4.27806e-17
FOXO1	1.37989	-0.195875	11.6927	3.04115e-19	6.04601e-17	33.354	FOXO1	11	11.7247	2.3088e-19	4.51718e-17
PDIA6	0.675714	0.024414	11.5259	6.40146e-19	1.12721e-16	32.6187	PDIA6	325	11.681	2.80749e-19	5.40705e-17
BCAS4	1.05691	-0.281199	11.6756	3.28257e-19	6.32202e-17	33.2785	BCAS4	7	11.6689	2.96375e-19	5.62019e-17
LAT	-1.82105	-0.763493	-11.6458	3.74806e-19	7.10747e-17	33.1475	LAT	2	-11.6455	3.29145e-19	6.14703e-17
RNF135	1.28355	-0.124635	11.5981	4.63828e-19	8.66234e-17	32.937	RNF135	8	11.616	3.75778e-19	6.9132e-17
ZHX2	0.978043	-0.0650569	11.5304	6.27519e-19	1.12721e-16	32.6384	ZHX2	79	11.6125	3.81717e-19	6.91918e-17
LYN	1.58601	-0.180129	11.528	6.34238e-19	1.12721e-16	32.6279	LYN	51	11.5872	4.27546e-19	7.63757e-17
SLC9A3R1	-1.25563	-0.127313	-11.4462	9.14585e-19	1.58777e-16	32.2662	SLC9A3R1	156	-11.5219	5.73156e-19	9.96372e-17
TET1	-1.59814	-0.300471	-11.5657	5.35918e-19	9.85929e-17	32.7943	TET1	1	-11.5217	5.73928e-19	9.96372e-17
SNX5	0.56566	-0.00935426	11.328	1.55304e-18	2.58686e-16	31.743	SNX5	115	11.4856	6.75032e-19	1.15562e-16
CCDC50	1.28208	-0.414561	11.4033	1.10806e-18	1.89695e-16	32.0766	CCDC50	46	11.4642	7.4317e-19	1.25484e-16
AFDN	1.17703	-0.0031856	11.3208	1.60448e-18	2.63691e-16	31.7108	AFDN	134	11.3972	1.00496e-18	1.67395e-16
PLCG1	-1.03711	0.0191731	-11.3042	1.7285e-18	2.80335e-16	31.6373	PLCG1	197	-11.3919	1.02903e-18	1.69118e-16
ZSCAN25	-0.530728	0.0345753	-11.3843	1.20675e-18	2.03758e-16	31.9923	ZSCAN25	17	-11.3773	1.09896e-18	1.78235e-16
INSR	1.14938	-0.122805	11.279	1.93523e-18	3.09787e-16	31.5257	INSR	68	11.3479	1.25459e-18	2.00831e-16
HIRA	-0.366863	0.0552594	-11.091	4.51059e-18	6.78019e-16	30.6895	HIRA	52	-11.2757	1.73841e-18	2.74714e-16
PIK3AP1	1.3875	-0.0236053	11.1149	4.04973e-18	6.23962e-16	30.796	PIK3AP1	86	11.1788	2.69323e-18	4.20212e-16
SLC4A4	-1.5547	-0.324581	-11.2079	2.6637e-18	4.20934e-16	31.21	SLC4A4	1	-11.166	2.85483e-18	4.39859e-16
TMEM192	0.839775	0.0892778	11.1339	3.71815e-18	5.80125e-16	30.8804	TMEM192	12	11.1421	3.181e-18	4.84061e-16
TNFRSF13C	2.21267	-0.0798765	11.0708	4.94158e-18	7.33854e-16	30.5993	TNFRSF13C	3	11.0967	3.90733e-18	5.87338e-16
ELOVL4	-1.93539	0.0472766	-11.4236	4.26451e-18	6.48943e-16	30.7956	ELOVL4	1	-11.4027	4.04807e-18	6.01163e-16
PTP4A2	-0.931514	0.0247116	-11.041	5.65185e-18	8.19585e-16	30.4666	PTP4A2	12	-11.0573	4.67e-18	6.85267e-16
SWAP70	1.16791	-0.0761589	10.9809	7.41235e-18	1.06238e-15	30.1987	SWAP70	143	11.0545	4.73143e-18	6.86114e-16
USP44	-2.34209	-0.368733	-13.257	5.13678e-18	7.53761e-16	30.6905	USP44	1	-13.1705	5.06126e-18	7.25408e-16
UNC13D	-1.03155	-0.145503	-10.9166	9.9116e-18	1.35745e-15	29.9115	UNC13D	91	-10.9908	6.31608e-18	8.94851e-16
GNG7	1.15961	-0.0797572	10.9338	9.17049e-18	1.28449e-15	29.9883	GNG7	16	10.9702	6.93529e-18	9.68186e-16
NUDT16	1.45795	-0.389162	10.9239	9.59126e-18	1.32834e-15	29.944	NUDT16	20	10.9685	6.9908e-18	9.68186e-16
TLE3	-1.398	-0.179294	-10.9081	1.03012e-17	1.39386e-15	29.8734	TLE3	34	-10.9604	7.25053e-18	9.93001e-16
ASF1A	-0.683835	-0.101779	-10.9059	1.04036e-17	1.39386e-15	29.8637	ASF1A	25	-10.951	7.5695e-18	1.02529e-15
CHST15	1.54239	-0.448131	10.9474	8.62674e-18	1.22222e-15	30.0487	CHST15	1	10.9091	9.15671e-18	1.2268e-15
SYK	1.29737	-0.0024996	10.8249	1.50134e-17	1.96867e-15	29.5012	SYK	79	10.8876	1.00963e-17	1.33814e-15
SHOC2	0.510353	0.0672432	10.7919	1.74324e-17	2.21517e-15	29.3536	SHOC2	36	10.8722	1.08282e-17	1.41988e-15
LYSMD1	-0.839069	0.0328269	-10.8769	1.18621e-17	1.57217e-15	29.734	LYSMD1	7	-10.8503	1.19633e-17	1.54778e-15
KIF16B	1.14041	0.189788	10.7867	1.78497e-17	2.24506e-15	29.3302	KIF16B	56	10.8486	1.20548e-17	1.54778e-15
BLNK	1.49993	-0.323688	10.8008	1.67448e-17	2.14996e-15	29.3933	BLNK	13	10.8385	1.26247e-17	1.60425e-15
VANGL1	-1.10904	-0.190354	-10.8057	1.63824e-17	2.12557e-15	29.415	VANGL1	12	-10.8321	1.29989e-17	1.63494e-15
IGFBP2	-1.43614	-0.10528	-10.7754	1.87902e-17	2.33947e-15	29.2794	IGFBP2	13	-10.8121	1.42382e-17	1.77272e-15
PRAG1	1.08941	0.00224379	10.6774	2.93196e-17	3.57815e-15	28.8397	PRAG1	30	10.7279	2.08965e-17	2.5757e-15
SLIT1	-1.62611	-0.641237	-10.684	2.84477e-17	3.50646e-15	28.8696	SLIT1	14	-10.724	2.12704e-17	2.57856e-15
PLXNB2	1.13847	0.18611	10.6564	3.22536e-17	3.89762e-15	28.7455	PLXNB2	91	10.7233	2.13381e-17	2.57856e-15
FAM107B	1.43696	-0.228563	10.6071	4.03446e-17	4.82804e-15	28.5243	FAM107B	42	10.6599	2.84987e-17	3.39715e-15
RABEP2	0.494613	0.0271003	10.5214	5.95941e-17	7.06304e-15	28.1388	RABEP2	77	10.6587	2.86633e-17	3.39715e-15
SIPA1	0.702732	-0.074044	10.4446	8.45176e-17	9.82796e-15	27.7935	SIPA1	66	10.5299	5.16213e-17	6.05985e-15
EXOC7	-0.381378	0.0719698	-10.2929	1.68905e-16	1.85886e-14	27.1092	EXOC7	77	-10.4822	6.42149e-17	7.4671e-15
C19orf47	-0.375772	0.0735674	-10.4655	7.68524e-17	9.02174e-15	27.8874	C19orf47	21	-10.4672	6.88072e-17	7.92633e-15
SIVA1	-1.3439	-0.488571	-10.4386	8.68751e-17	1.00077e-14	27.7663	SIVA1	7	-10.4591	7.13872e-17	8.1474e-15
CTSS	1.42076	-0.0489616	10.3884	1.09237e-16	1.24672e-14	27.5399	CTSS	28	10.4355	7.95585e-17	8.99668e-15
LRMP	1.40671	-0.111953	10.3199	1.49297e-16	1.68829e-14	27.2312	LRMP	147	10.3801	1.02526e-16	1.14885e-14
C9orf78	-0.680334	-0.169338	-10.2729	1.85035e-16	2.00065e-14	27.0191	C9orf78	81	-10.3644	1.10167e-16	1.22335e-14
NME3	1.15497	-0.033562	10.3172	1.5119e-16	1.69415e-14	27.2187	NME3	5	10.3162	1.37475e-16	1.51297e-14
HNRNPLL	-1.37441	-0.202002	-10.2376	2.17434e-16	2.31042e-14	26.8596	HNRNPLL	52	-10.2907	1.54489e-16	1.68516e-14
TESPA1	-1.28308	-0.0461475	-10.3138	1.53503e-16	1.70457e-14	27.2037	TESPA1	2	-10.287	1.57161e-16	1.68595e-14
SPI1	1.49354	-0.0958296	10.2744	1.83833e-16	2.00065e-14	27.0255	SPI1	4	10.2868	1.57297e-16	1.68595e-14
RERE	0.455776	0.0529208	10.2088	2.48028e-16	2.61299e-14	26.7295	RERE	34	10.2826	1.60384e-16	1.70422e-14
ZNF687	0.457892	0.0678158	10.2039	2.53707e-16	2.65017e-14	26.7072	ZNF687	29	10.2601	1.77858e-16	1.87374e-14
PLCG2	1.24808	-0.211951	10.1826	2.79675e-16	2.89686e-14	26.6109	PLCG2	220	10.2473	1.88618e-16	1.97026e-14
TMEM243	1.03713	0.187107	10.2621	1.9445e-16	2.08417e-14	26.97	TMEM243	1	10.1509	2.93711e-16	3.04225e-14
HES1	-1.64643	-0.3028	-10.3948	3.39929e-16	3.46278e-14	26.4753	HES1	1	-10.3657	3.43886e-16	3.53228e-14
POMGNT2	-0.824433	0.0564949	-10.1749	2.89651e-16	2.9752e-14	26.5762	POMGNT2	3	-10.0912	3.86608e-16	3.93829e-14
SYVN1	0.587	-0.0684025	10.0711	4.65906e-16	4.70718e-14	26.1065	SYVN1	16	10.0783	4.10094e-16	4.1433e-14
OFD1	0.733742	-0.126548	9.9363	8.64052e-16	8.52024e-14	25.4962	OFD1	75	10.0143	5.50625e-16	5.51789e-14
CLEC2D	1.45182	-0.240465	9.9889	6.78887e-16	6.74836e-14	25.7345	CLEC2D	5	10.0064	5.7117e-16	5.67762e-14
GAB1	1.47296	-0.452575	9.93359	8.74858e-16	8.55834e-14	25.4839	GAB1	54	9.9841	6.32883e-16	6.24074e-14
THUMPD3	-0.492944	0.0215462	-9.87641	1.13734e-15	1.09522e-13	25.2246	THUMPD3	46	-9.96468	6.92128e-16	6.77077e-14
KIF13A	1.34391	-0.134207	9.92831	8.9633e-16	8.69934e-14	25.4599	KIF13A	12	9.96108	7.03713e-16	6.82989e-14
OCIAD2	-1.19853	-0.177505	-9.83756	1.35939e-15	1.28891e-13	25.0484	OCIAD2	19	-9.87605	1.04142e-15	1.00286e-13
SSBP3	-1.87814	-0.108224	-10.4036	1.2257e-15	1.17116e-13	25.2692	SSBP3	1	-10.3832	1.16884e-15	1.11683e-13
CIAO2A	0.442931	0.0329697	10.0069	6.251e-16	6.26422e-14	25.8161	CIAO2A	7	9.84584	1.19715e-15	1.13508e-13
PGM2L1	-1.0332	-0.00479948	-9.71904	2.34317e-15	2.17158e-13	24.5104	PGM2L1	35	-9.76762	1.71751e-15	1.61603e-13
ZNF608	1.56932	-0.477948	9.70448	2.50539e-15	2.30459e-13	24.4443	ZNF608	23	9.74654	1.89311e-15	1.76776e-13
MEF2C	1.12758	-0.179248	9.68335	2.7609e-15	2.52081e-13	24.3483	MEF2C	22	9.7234	2.10659e-15	1.95232e-13
FYB1	-1.90665	-0.381533	-9.65959	3.0797e-15	2.7912e-13	24.2403	FYB1	30	-9.70339	2.31053e-15	2.12535e-13
POU2AF1	1.3631	-0.224555	9.73196	2.20803e-15	2.07757e-13	24.5691	POU2AF1	1	9.69703	2.37937e-15	2.17245e-13
CIITA	1.16141	0.0412555	9.72213	2.31013e-15	2.15717e-13	24.5244	CIITA	2	9.6911	2.44544e-15	2.21636e-13
NOTCH1	-0.855647	-0.121208	-9.62397	3.62787e-15	3.19408e-13	24.0785	NOTCH1	48	-9.6813	2.55876e-15	2.30214e-13
TDRKH	-0.814211	-0.0276288	-9.61298	3.81602e-15	3.33591e-13	24.0285	TDRKH	21	-9.64839	2.97891e-15	2.66073e-13
PRKAR1B	-0.866887	-0.196705	-9.60526	3.95398e-15	3.40817e-13	23.9934	PRKAR1B	25	-9.64657	3.00412e-15	2.66394e-13
CXorf21	1.57943	-0.0744657	9.63037	3.5227e-15	3.1238e-13	24.1075	CXorf21	3	9.64306	3.05313e-15	2.68806e-13
CFAP97	0.564221	-0.0333377	9.64356	3.31524e-15	2.98275e-13	24.1675	CFAP97	14	9.64019	3.09402e-15	2.70475e-13
TFRC	-0.842218	-0.20355	-9.54209	5.28791e-15	4.4643e-13	23.7062	TFRC	254	-9.62066	3.38625e-15	2.93936e-13
PPP2R5D	-0.349081	0.0924842	-9.44182	8.39015e-15	6.58707e-13	23.2502	PPP2R5D	76	-9.6149	3.4776e-15	2.98046e-13
CD6	-1.38225	-0.303016	-9.59096	4.2228e-15	3.6146e-13	23.9285	CD6	7	-9.61463	3.48196e-15	2.98046e-13
BOLA1	-0.826248	0.096728	-9.61128	3.84604e-15	3.33847e-13	24.0208	BOLA1	8	-9.60784	3.59287e-15	3.05418e-13
TSPO	1.09195	-0.00334403	9.55985	4.87291e-15	4.14231e-13	23.787	TSPO	13	9.58874	3.92449e-15	3.31324e-13
MEF2A	0.648565	0.023865	9.63116	3.50982e-15	3.1238e-13	24.1112	MEF2A	7	9.58708	3.95472e-15	3.31605e-13
HEMGN	-1.97305	-0.634947	-9.53105	5.56337e-15	4.60229e-13	23.6561	HEMGN	5	-9.56081	4.46542e-15	3.71897e-13
ECE1	-1.1516	-0.235266	-9.5162	5.95716e-15	4.8952e-13	23.5885	ECE1	25	-9.5578	4.52801e-15	3.74579e-13
AUTS2	0.832459	-0.0632727	9.53971	5.34598e-15	4.48262e-13	23.6954	AUTS2	11	9.55219	4.64699e-15	3.81859e-13
AAR2	-0.435838	-0.0440575	-9.47833	7.09166e-15	5.67609e-13	23.4163	AAR2	34	-9.54531	4.7972e-15	3.91591e-13
RIC1	0.521477	0.0323983	9.53423	5.48268e-15	4.56618e-13	23.6705	RIC1	16	9.53632	5.00088e-15	4.05509e-13
CPNE2	1.34763	-0.117288	9.48897	6.75276e-15	5.47595e-13	23.4646	CPNE2	38	9.53491	5.0335e-15	4.05509e-13
PSD3	1.46093	0.10016	9.48318	6.93517e-15	5.58711e-13	23.4383	PSD3	49	9.53034	5.14106e-15	4.11485e-13
TXNRD2	0.695711	0.126718	9.46342	7.59566e-15	6.00155e-13	23.3484	TXNRD2	28	9.50795	5.702e-15	4.53437e-13
WASHC4	0.396072	0.0897444	9.3281	1.41684e-14	1.03337e-12	22.7326	WASHC4	114	9.49178	6.14476e-15	4.85515e-13
KIAA0040	1.26999	-0.310028	9.50003	6.41735e-15	5.23843e-13	23.515	KIAA0040	2	9.48423	6.36314e-15	4.99567e-13
SYNE3	1.05729	0.0104244	9.40279	1.00427e-14	7.68862e-13	23.0726	SYNE3	136	9.46322	7.01274e-15	5.47082e-13
CTSO	1.38333	-0.0383647	9.46757	7.45205e-15	5.92606e-13	23.3673	CTSO	2	9.46119	7.07872e-15	5.48757e-13
STX7	0.974659	0.0053039	9.40299	1.00335e-14	7.68862e-13	23.0735	STX7	44	9.45398	7.31897e-15	5.63835e-13
ARL4C	-1.94652	-0.557862	-9.41727	9.39466e-15	7.32902e-13	23.1385	ARL4C	5	-9.44664	7.57198e-15	5.79703e-13
SCYL2	-0.350088	0.0821242	-9.27366	1.82086e-14	1.30111e-12	22.4848	SCYL2	81	-9.44373	7.67454e-15	5.83928e-13
LCMT1	-0.449295	0.13981	-9.34141	1.33254e-14	9.89448e-13	22.7932	LCMT1	45	-9.4266	8.30752e-15	6.28212e-13
LCP2	-0.995695	-0.170402	-9.35954	1.22572e-14	9.21234e-13	22.8757	LCP2	61	-9.41418	8.79889e-15	6.61312e-13
AKAP7	1.10614	-0.138913	9.38678	1.08113e-14	8.17544e-13	22.9997	AKAP7	6	9.39598	9.57196e-15	7.15054e-13
GGA2	0.73396	-0.0396355	9.35301	1.26316e-14	9.43615e-13	22.846	GGA2	26	9.39415	9.6535e-15	7.16801e-13
CLCC1	0.863374	-0.102831	9.32953	1.40751e-14	1.03268e-12	22.7391	CLCC1	38	9.37952	1.03299e-14	7.62437e-13
LAT2	1.30563	-0.102492	9.32391	1.4444e-14	1.04728e-12	22.7135	LAT2	24	9.36442	1.10774e-14	8.12738e-13
RASSF3	0.563238	-0.0701045	9.39535	1.03931e-14	7.90776e-13	23.0387	RASSF3	8	9.34486	1.21271e-14	8.84492e-13
ZAP70	-0.938044	-0.123295	-9.27745	1.78939e-14	1.28983e-12	22.502	ZAP70	168	-9.34297	1.22337e-14	8.87016e-13
CASP6	-0.607054	-0.00471045	-9.27303	1.82616e-14	1.30111e-12	22.4819	CASP6	47	-9.33926	1.2446e-14	8.9713e-13
STRBP	0.597114	-0.084528	9.22761	2.25156e-14	1.57686e-12	22.275	STRBP	177	9.3286	1.30756e-14	9.37033e-13
MTHFSD	0.480867	0.0930193	9.33795	1.35395e-14	9.99325e-13	22.7774	MTHFSD	10	9.28465	1.6026e-14	1.14183e-12
SLC17A9	1.17472	-0.134447	10.3021	9.86535e-15	7.64782e-13	23.285	SLC17A9	1	10.1171	1.69154e-14	1.19827e-12
ARL11	1.28869	-0.190072	9.25171	2.01475e-14	1.42723e-12	22.3848	ARL11	5	9.26569	1.7497e-14	1.23239e-12
GSK3B	-0.518766	0.0965499	-9.19565	2.60894e-14	1.80662e-12	22.1295	GSK3B	37	-9.25744	1.81781e-14	1.27309e-12
DEPDC5	0.415429	0.105766	9.20061	2.55002e-14	1.77579e-12	22.1521	DEPDC5	27	9.24386	1.93582e-14	1.34807e-12
AC093323.1	-0.821819	-0.0509155	-9.24703	2.05875e-14	1.45006e-12	22.3635	AC093323.1	7	-9.24002	1.97051e-14	1.36452e-12
IL32	-1.78806	-0.999481	-9.17965	2.8087e-14	1.93408e-12	22.0567	IL32	10	-9.21399	2.22297e-14	1.53074e-12
GSE1	-0.601866	-0.117886	-9.14317	3.32329e-14	2.25071e-12	21.8905	GSE1	45	-9.20663	2.30007e-14	1.57504e-12
ADA	-1.31966	0.0927187	-9.13996	3.37294e-14	2.27185e-12	21.8759	ADA	254	-9.19357	2.44343e-14	1.66396e-12
LRRC8C	0.875973	-0.099493	9.13399	3.46709e-14	2.32257e-12	21.8487	LRRC8C	51	9.18746	2.51358e-14	1.70233e-12
EXOC5	-0.360828	0.107283	-9.02975	5.60748e-14	3.67648e-12	21.3739	EXOC5	86	-9.18586	2.53231e-14	1.70564e-12
ZFHX3	1.24204	-0.211327	9.1285	3.55601e-14	2.36926e-12	21.8237	ZFHX3	35	9.17222	2.69751e-14	1.80704e-12
CD79A	1.30824	-0.363188	9.1475	3.2577e-14	2.21847e-12	21.9102	CD79A	6	9.16665	2.76797e-14	1.84422e-12
CDKAL1	-0.387672	-0.0216241	-9.05158	5.07034e-14	3.34209e-12	21.4733	CDKAL1	49	-9.15244	2.95633e-14	1.95912e-12
USP47	-0.280844	0.0839628	-8.81999	1.4757e-13	8.94688e-12	20.4184	USP47	192	-9.10838	3.62567e-14	2.38984e-12
GXYLT2	-1.30861	-0.387546	-9.59901	3.2011e-14	2.19204e-12	22.0543	GXYLT2	1	-9.52711	3.8612e-14	2.53155e-12
ERVK3-1	-0.653732	-0.104602	-9.06106	4.85341e-14	3.21629e-12	21.5165	ERVK3-1	10	-9.05419	4.66035e-14	3.03934e-12
LDLRAP1	1.22148	-0.59119	9.00393	6.31672e-14	4.11957e-12	21.2562	LDLRAP1	19	9.04011	4.97439e-14	3.22707e-12
LDLR	-0.79095	-0.02763	-8.94235	8.39169e-14	5.38729e-12	20.9758	LDLR	30	-8.9855	6.40644e-14	4.13434e-12
MAPRE1	-0.335824	0.0112316	-8.79703	1.64051e-13	9.72161e-12	20.3139	MAPRE1	120	-8.9825	6.49615e-14	4.17039e-12
MTERF2	0.984112	-0.00772811	8.99623	6.545e-14	4.24598e-12	21.2212	MTERF2	2	8.95445	7.39794e-14	4.72471e-12
CD28	-1.35359	-0.34577	-8.93656	8.61881e-14	5.50443e-12	20.9494	CD28	4	-8.94968	7.56303e-14	4.80525e-12
PHLPP1	0.844618	-0.173767	8.87959	1.12096e-13	6.99971e-12	20.6899	PHLPP1	34	8.92459	8.49527e-14	5.36988e-12
IQSEC1	0.867438	-0.0603764	8.87623	1.13847e-13	7.05164e-12	20.6746	IQSEC1	39	8.92342	8.54164e-14	5.37164e-12
CD7	-1.25161	-0.463479	-8.88653	1.08565e-13	6.82738e-12	20.7215	CD7	12	-8.91665	8.81389e-14	5.51472e-12
OGDHL	-1.71255	-0.714045	-8.89132	1.06191e-13	6.71237e-12	20.7433	OGDHL	4	-8.9145	8.90198e-14	5.53449e-12
WDFY4	1.36675	-0.337997	8.86648	1.19084e-13	7.33914e-12	20.6302	WDFY4	89	8.9137	8.93528e-14	5.53449e-12
RNPEP	0.554022	0.107525	8.81382	1.5183e-13	9.10129e-12	20.3903	RNPEP	133	8.90848	9.15377e-14	5.64147e-12
GALNT14	1.32022	-0.433374	8.87892	1.12441e-13	6.99971e-12	20.6869	GALNT14	4	8.89096	9.92771e-14	6.08801e-12
FAM135A	0.653979	-0.0577863	8.9434	8.3514e-14	5.38729e-12	20.9805	FAM135A	5	8.88863	1.00358e-13	6.12382e-12
CDK14	1.06045	0.00938445	8.84892	1.29133e-13	7.9189e-12	20.5502	CDK14	22	8.88567	1.0174e-13	6.17759e-12
COA7	0.57084	0.0795308	8.80078	1.61241e-13	9.60127e-12	20.331	COA7	63	8.87374	1.07524e-13	6.49679e-12
HSDL1	-0.736973	0.171588	-8.81925	1.48074e-13	8.94688e-12	20.4151	HSDL1	25	-8.85694	1.16228e-13	6.98843e-12
WDR91	0.66735	0.18426	8.79338	1.66839e-13	9.79263e-12	20.2973	WDR91	46	8.84957	1.20263e-13	7.1959e-12
FES	1.15563	-0.0381202	8.81342	1.52107e-13	9.10129e-12	20.3885	FES	14	8.84425	1.23265e-13	7.33991e-12
MTA3	-0.680692	-0.123768	-8.78503	1.73391e-13	1.0129e-11	20.2592	MTA3	32	-8.83042	1.3142e-13	7.7879e-12
PTK2	1.38828	-0.158059	8.77481	1.8176e-13	1.05678e-11	20.2127	PTK2	46	8.81784	1.39305e-13	8.21568e-12
TMCO4	1.04169	-0.206923	8.79561	1.65129e-13	9.73869e-12	20.3074	TMCO4	7	8.80892	1.45188e-13	8.52183e-12
EXOC6B	-1.2031	-0.00667294	-8.76188	1.9293e-13	1.11124e-11	20.1538	EXOC6B	24	-8.79991	1.51375e-13	8.8429e-12
ZNRF1	-0.683045	0.100263	-8.92139	9.24383e-14	5.87317e-12	20.8803	ZNRF1	2	-8.79765	1.52966e-13	8.89365e-12
NEIL3	-0.933062	-0.256559	-8.7638	1.91226e-13	1.1066e-11	20.1626	NEIL3	15	-8.79164	1.57283e-13	9.10172e-12
ARHGAP15	-0.666764	0.0695215	-8.71827	2.3591e-13	1.32778e-11	19.9553	ARHGAP15	63	-8.78114	1.65124e-13	9.51085e-12
MCCC1	0.622049	0.143149	8.69827	2.58706e-13	1.4429e-11	19.8642	MCCC1	109	8.77593	1.69157e-13	9.69781e-12
IL2RG	-0.985678	-0.20074	-8.82257	1.45822e-13	8.89801e-12	20.4302	IL2RG	1	-8.75106	1.89817e-13	1.08319e-11
ZFP36L1	1.21498	-0.019239	8.74477	2.0877e-13	1.19134e-11	20.0759	ZFP36L1	3	8.74556	1.94709e-13	1.10598e-11
SLA	-1.75125	-0.389284	-8.91448	2.129e-13	1.20931e-11	20.1194	SLA	1	-8.91349	1.9756e-13	1.11703e-11
LAMC1	1.05374	-0.19793	8.68804	2.71213e-13	1.49823e-11	19.8176	LAMC1	15	8.71819	2.21026e-13	1.244e-11
MAPK8	-0.491572	-0.107633	-8.66344	3.03782e-13	1.65682e-11	19.7057	MAPK8	28	-8.70564	2.34258e-13	1.31249e-11
TRAK1	0.637164	0.0067272	8.69613	2.61275e-13	1.45067e-11	19.8545	TRAK1	13	8.70462	2.3537e-13	1.31275e-11
ADCY9	1.12351	-0.132191	8.70042	2.5616e-13	1.4352e-11	19.874	ADCY9	4	8.70346	2.36629e-13	1.31383e-11
PPFIBP1	1.10021	-0.1636	8.65114	3.21517e-13	1.73817e-11	19.6497	PPFIBP1	102	8.70153	2.38758e-13	1.31848e-11
PXYLP1	-1.42275	-0.0570108	-9.44172	2.06062e-13	1.18136e-11	20.2896	PXYLP1	1	-9.37087	2.39606e-13	1.31848e-11
SLA2	-1.22246	-0.281535	-8.90974	2.17373e-13	1.22906e-11	20.0989	SLA2	1	-8.86226	2.4761e-13	1.35646e-11
CSRP2	1.40721	-0.0421841	8.64802	3.26173e-13	1.75564e-11	19.6355	CSRP2	16	8.68244	2.60834e-13	1.42259e-11
MAPK12	1.25542	-0.334624	8.64276	3.34178e-13	1.78315e-11	19.6116	MAPK12	14	8.67454	2.70554e-13	1.4691e-11
ZNF711	-1.26185	-0.0778605	-8.64443	3.31622e-13	1.77721e-11	19.6191	ZNF711	7	-8.66619	2.81216e-13	1.52029e-11
COQ5	0.490727	0.184578	8.61407	3.81442e-13	2.02658e-11	19.481	COQ5	31	8.66196	2.86775e-13	1.54358e-11
UPRT	-0.404283	0.137395	-8.67546	2.87404e-13	1.57446e-11	19.7604	UPRT	11	-8.61936	3.49318e-13	1.87204e-11
MILR1	1.54658	-0.389518	8.57256	4.61892e-13	2.43303e-11	19.2921	MILR1	10	8.60361	3.75743e-13	2.00494e-11
SRPK2	-0.501649	0.0240261	-8.51835	5.93005e-13	3.06426e-11	19.0455	SRPK2	74	-8.60148	3.7946e-13	2.01604e-11
GK5	-1.00796	-0.200715	-8.65957	3.09257e-13	1.67925e-11	19.6881	GK5	1	-8.5978	3.85981e-13	2.04189e-11
DIRAS1	1.51348	-0.517205	8.58148	4.43292e-13	2.34507e-11	19.3327	DIRAS1	3	8.59643	3.88439e-13	2.04611e-11
MED13	-0.379515	0.130292	-8.51577	6.00113e-13	3.08208e-11	19.0338	MED13	32	-8.57196	4.35023e-13	2.28174e-11
CHST11	-0.887375	-0.0145645	-8.53747	5.42989e-13	2.83597e-11	19.1325	CHST11	12	-8.55878	4.62401e-13	2.41507e-11
EIF5A2	-1.41447	-0.422182	-8.54388	5.2718e-13	2.76512e-11	19.1616	EIF5A2	3	-8.55564	4.69153e-13	2.43999e-11
GRK2	0.530473	0.0132442	8.4583	7.82035e-13	3.90257e-11	18.7725	GRK2	119	8.54715	4.87964e-13	2.52716e-11
SYNJ2	-0.94177	-0.00731332	-8.50164	6.40479e-13	3.23653e-11	18.9695	SYNJ2	42	-8.54616	4.90211e-13	2.52818e-11
RHBDF2	0.824768	-0.031766	8.51793	5.94158e-13	3.06426e-11	19.0436	RHBDF2	13	8.53889	5.06973e-13	2.60373e-11
OSBPL5	-0.997914	-0.13254	-8.50421	6.32948e-13	3.22385e-11	18.9812	OSBPL5	16	-8.53427	5.17937e-13	2.649e-11
CLIP2	1.07016	-0.0307586	8.48145	7.02938e-13	3.5365e-11	18.8777	CLIP2	79	8.52946	5.29598e-13	2.69745e-11
ID3	0.684131	-0.125315	8.52696	5.6995e-13	2.96422e-11	19.0847	ID3	9	8.52393	5.4333e-13	2.756e-11
NRROS	-0.888426	-0.115466	-8.50157	6.40689e-13	3.23653e-11	18.9692	NRROS	9	-8.51529	5.6549e-13	2.83645e-11
PET117	-0.575544	0.102778	-8.68719	2.72272e-13	1.49823e-11	19.8138	PET117	2	-8.5152	5.65716e-13	2.83645e-11
CYP4V2	-1.27118	-0.360224	-8.5093	6.18269e-13	3.16215e-11	19.0044	CYP4V2	3	-8.51506	5.66093e-13	2.83645e-11
MICALL1	0.582765	-0.0326658	8.44687	8.24352e-13	4.09716e-11	18.7205	MICALL1	58	8.51093	5.77014e-13	2.87946e-11
YARS2	0.319355	0.0487583	8.36272	1.21457e-12	5.87091e-11	18.3381	YARS2	71	8.50328	5.9781e-13	2.97121e-11
AZI2	-0.558336	0.0481571	-8.46334	7.64113e-13	3.82864e-11	18.7954	AZI2	22	-8.49251	6.28353e-13	3.11048e-11
RHOG	-0.606177	0.0171392	-8.38765	1.08285e-12	5.29654e-11	18.4514	RHOG	42	-8.44036	7.99801e-13	3.94334e-11
ENG	1.342	-0.35359	8.39308	1.0561e-12	5.18625e-11	18.4761	ENG	19	8.42785	8.47454e-13	4.15906e-11
RHOH	-1.25544	-0.117869	-8.43121	8.86018e-13	4.38597e-11	18.6493	RHOH	2	-8.42713	8.50302e-13	4.15906e-11
HDGF	0.523093	0.0422851	8.31517	1.51176e-12	7.13944e-11	18.1222	HDGF	369	8.41835	8.85511e-13	4.31416e-11
DNM1L	0.292114	-0.0166142	8.1873	2.72235e-12	1.22311e-10	17.542	DNM1L	223	8.41315	9.07094e-13	4.40191e-11
PAOX	1.78912	-0.561224	8.58283	1.00662e-12	4.96305e-11	18.5941	PAOX	1	8.58641	9.21002e-13	4.45187e-11
CHD7	0.730346	-0.239032	8.34458	1.32036e-12	6.33258e-11	18.2557	CHD7	104	8.40611	9.37109e-13	4.51203e-11
MCRIP1	-0.384067	0.0562045	-8.37827	1.13065e-12	5.48676e-11	18.4088	MCRIP1	20	-8.38857	1.01628e-12	4.86708e-11
ERO1B	1.10066	-0.397129	8.3598	1.23098e-12	5.92699e-11	18.3249	ERO1B	13	8.38804	1.01875e-12	4.86708e-11
CD81	0.74177	0.00686033	8.32638	1.43571e-12	6.83267e-11	18.1731	CD81	35	8.36991	1.10785e-12	5.27236e-11
STIM2	0.821948	-0.0123285	8.3139	1.52063e-12	7.15394e-11	18.1164	STIM2	45	8.36011	1.15919e-12	5.49546e-11
JPT1	-0.429408	-0.15928	-8.25631	1.98206e-12	9.13898e-11	17.855	JPT1	85	-8.35474	1.18833e-12	5.61202e-11
ABRAXAS1	0.581379	0.179165	8.31908	1.48482e-12	7.03921e-11	18.1399	ABRAXAS1	24	8.3523	1.20182e-12	5.63858e-11
AC040160.1	-1.17874	-0.328025	-8.38161	1.11338e-12	5.42432e-11	18.4239	AC040160.1	1	-8.35207	1.2031e-12	5.63858e-11
COQ8A	0.703194	0.164365	8.29117	1.68835e-12	7.85308e-11	18.0132	COQ8A	27	8.32872	1.34021e-12	6.25737e-11
TEX30	-0.734201	-0.124354	-8.29533	1.65628e-12	7.73309e-11	18.0321	TEX30	16	-8.31885	1.40274e-12	6.52461e-11
CAPN5	-1.08585	0.171873	-8.31186	1.535e-12	7.19408e-11	18.1071	CAPN5	4	-8.31555	1.42433e-12	6.60013e-11
SAV1	0.484	-0.0150641	8.3366	1.36978e-12	6.54415e-11	18.2195	SAV1	10	8.30688	1.48254e-12	6.84411e-11
RALGAPA1	-0.544397	0.137119	-8.24072	2.1294e-12	9.72109e-11	17.7843	RALGAPA1	58	-8.30557	1.49154e-12	6.85995e-11
MAST3	0.705365	-0.0222684	8.27068	1.85525e-12	8.59691e-11	17.9202	MAST3	23	8.3038	1.50376e-12	6.89047e-11
GALNT1	0.772235	0.0228449	8.25576	1.98706e-12	9.13898e-11	17.8525	GALNT1	40	8.30074	1.52519e-12	6.96276e-11
ROCK2	0.3542	0.0746249	8.14173	3.35677e-12	1.45689e-10	17.3354	ROCK2	178	8.2964	1.55605e-12	7.07743e-11
SEMA4D	-0.865612	-0.2203	-8.24805	2.05883e-12	9.43389e-11	17.8175	SEMA4D	54	-8.29512	1.5653e-12	7.09335e-11
PAFAH1B3	-0.339268	0.0798082	-8.23518	2.18434e-12	9.93514e-11	17.7592	PAFAH1B3	29	-8.28214	1.66206e-12	7.50423e-11
PCNA	-0.420978	-0.0969107	-8.12564	3.61428e-12	1.54686e-10	17.2625	PCNA	493	-8.26112	1.83156e-12	8.23934e-11
LYPLA1	0.485163	0.0502647	8.18678	2.72883e-12	1.22311e-10	17.5397	LYPLA1	53	8.25473	1.8864e-12	8.45517e-11
WDR81	0.544646	0.088206	8.18394	2.7648e-12	1.23474e-10	17.5267	WDR81	58	8.24793	1.94662e-12	8.69351e-11
TRIM25	0.319507	-0.017251	8.07528	4.5549e-12	1.90965e-10	17.0344	TRIM25	151	8.24699	1.95503e-12	8.69954e-11
PDLIM7	0.708311	-0.082196	8.2001	2.56673e-12	1.15888e-10	17.6	PDLIM7	35	8.24337	1.98805e-12	8.81462e-11
ACAT1	0.644119	0.047943	8.16688	2.99027e-12	1.31636e-10	17.4494	ACAT1	153	8.23735	2.04402e-12	9.03032e-11
INPPL1	0.555958	0.00721826	8.15964	3.0915e-12	1.35608e-10	17.4166	INPPL1	99	8.23443	2.07184e-12	9.12054e-11
ENO2	-0.978359	0.237924	-8.17562	2.87248e-12	1.26904e-10	17.4891	ENO2	93	-8.22411	2.1729e-12	9.53138e-11
IRF4	1.19584	-0.506777	8.18109	2.80118e-12	1.24647e-10	17.5138	IRF4	45	8.22169	2.19733e-12	9.60438e-11
PTK2B	0.867478	-0.0508362	8.13397	3.47852e-12	1.50443e-10	17.3003	PTK2B	225	8.19072	2.53506e-12	1.10414e-10
PKD2	0.673784	0.0539896	8.15808	3.11366e-12	1.36096e-10	17.4095	PKD2	20	8.18633	2.58698e-12	1.12279e-10
TOP2B	0.911193	-0.0443298	8.12736	3.58586e-12	1.54005e-10	17.2703	TOP2B	735	8.18524	2.60007e-12	1.123e-10
SCAPER	-0.416095	0.102376	-8.11775	3.74771e-12	1.59842e-10	17.2268	SCAPER	43	-8.18477	2.60571e-12	1.123e-10
MEA1	-0.59162	-0.13188	-8.23227	2.21383e-12	1.00322e-10	17.7459	MEA1	5	-8.17882	2.67816e-12	1.15021e-10
UPF2	0.27467	0.0292795	7.95203	8.01843e-12	3.11783e-10	16.4769	UPF2	158	8.16681	2.83087e-12	1.21157e-10
WASHC5	0.307263	0.116289	7.99511	6.5808e-12	2.65951e-10	16.6717	WASHC5	104	8.15378	3.00634e-12	1.28222e-10
GGT7	-1.0466	0.00104781	-8.12818	3.57227e-12	1.53957e-10	17.274	GGT7	3	-8.12312	3.46298e-12	1.47188e-10
TMCO1	-0.38505	-0.054658	-8.18006	2.81454e-12	1.24791e-10	17.5092	TMCO1	9	-8.10364	3.78864e-12	1.60477e-10
ADNP2	-0.543108	0.0172074	-8.08134	4.42992e-12	1.86997e-10	17.0619	ADNP2	18	-8.10032	3.84703e-12	1.62392e-10
BUD13	-0.298399	-0.00834914	-7.99175	6.68303e-12	2.68788e-10	16.6565	BUD13	48	-8.09588	3.92667e-12	1.6492e-10
FRMD8	0.423629	0.0178803	8.09688	4.12473e-12	1.75315e-10	17.1323	FRMD8	16	8.09549	3.93368e-12	1.6492e-10
ZNF101	-0.670322	-0.0688788	-8.15729	3.12507e-12	1.36112e-10	17.4059	ZNF101	3	-8.09297	3.97965e-12	1.66282e-10
ANTXR1	-1.27022	-0.152393	-8.06204	4.84051e-12	2.02251e-10	16.9745	ANTXR1	6	-8.08227	4.18096e-12	1.73637e-10
GNAO1	-1.62953	0.153979	-8.07762	4.50616e-12	1.89566e-10	17.045	GNAO1	1	-8.08212	4.18386e-12	1.73637e-10
GRK3	-1.13268	-0.203626	-8.03958	5.36621e-12	2.23459e-10	16.8728	GRK3	21	-8.07318	4.35977e-12	1.80331e-10
CDYL	0.567289	0.0528782	8.01829	5.91683e-12	2.43916e-10	16.7765	CDYL	33	8.06189	4.59283e-12	1.89335e-10
DNAJB14	-0.433278	-0.0807525	-8.00825	6.19582e-12	2.54566e-10	16.7311	DNAJB14	28	-8.04758	4.90578e-12	2.01562e-10
UGDH	0.627067	-0.119588	7.98522	6.8863e-12	2.73808e-10	16.6269	UGDH	80	8.04585	4.9451e-12	2.02502e-10
SLC9A7	0.978183	-0.124195	8.02841	5.64834e-12	2.33629e-10	16.8223	SLC9A7	8	8.0449	4.96677e-12	2.02717e-10
DCLRE1C	0.471081	0.010029	8.03607	5.45317e-12	2.26316e-10	16.857	DCLRE1C	16	8.04223	5.0284e-12	2.04555e-10
EXOC8	-0.307917	0.0815544	-7.908	9.81147e-12	3.72117e-10	16.278	EXOC8	74	-8.04009	5.07805e-12	2.05427e-10
NIBAN3	1.18478	-0.0535757	8.00537	6.27821e-12	2.56242e-10	16.7181	NIBAN3	23	8.03987	5.08318e-12	2.05427e-10
BCL11A	1.01761	0.0607973	8.00006	6.43301e-12	2.60833e-10	16.6941	BCL11A	33	8.03817	5.12333e-12	2.06373e-10
GPD2	1.0027	-0.0839125	7.98167	6.99933e-12	2.77408e-10	16.6109	GPD2	95	8.02804	5.36798e-12	2.15524e-10
TMEM186	0.522704	0.146517	8.096	4.14153e-12	1.75425e-10	17.1282	TMEM186	5	8.02267	5.50249e-12	2.20207e-10
PDE8A	0.869435	-0.158032	8.00705	6.23018e-12	2.55127e-10	16.7256	PDE8A	9	8.02165	5.52853e-12	2.20533e-10
CAST	0.927959	-0.19883	7.95831	7.79075e-12	3.04394e-10	16.5053	CAST	180	8.00967	5.84199e-12	2.32285e-10
TTC39B	-1.90093	-0.438265	-8.53171	6.80377e-12	2.72283e-10	16.8496	TTC39B	1	-8.53083	6.20317e-12	2.45853e-10
TRIM38	0.544424	0.150016	7.97392	7.2525e-12	2.8652e-10	16.5759	TRIM38	19	7.99559	6.23337e-12	2.46258e-10
ARFRP1	-0.414421	-0.0480485	-7.99137	6.69463e-12	2.68788e-10	16.6548	ARFRP1	16	-7.98934	6.4154e-12	2.5264e-10
NANP	-0.656386	-0.0643933	-7.96184	7.66588e-12	3.01884e-10	16.5212	NANP	19	-7.98783	6.46036e-12	2.536e-10
GZMM	-1.5283	-0.068568	-8.12296	6.87072e-12	2.73808e-10	16.6934	GZMM	1	-8.11839	6.58683e-12	2.57744e-10
PNMA2	-1.44708	-0.283573	-7.96048	7.71379e-12	3.02803e-10	16.5151	PNMA2	5	-7.98217	6.63071e-12	2.5864e-10
SLC43A1	0.851069	-0.0747238	7.95795	7.80372e-12	3.04394e-10	16.5037	SLC43A1	11	7.97672	6.79936e-12	2.64382e-10
TCL1A	1.6807	-0.324068	7.93758	8.56748e-12	3.32084e-10	16.4116	TCL1A	50	7.9752	6.84698e-12	2.65292e-10
MEGF9	-0.827321	0.0418381	-8.00174	6.38381e-12	2.59693e-10	16.7016	MEGF9	3	-7.97461	6.86581e-12	2.65292e-10
UIMC1	0.398645	0.123955	7.88035	1.11366e-11	4.1597e-10	16.1531	UIMC1	63	7.96529	7.16669e-12	2.76052e-10
MSRA	1.3163	-0.166634	7.92054	9.26347e-12	3.57936e-10	16.3346	MSRA	18	7.95314	7.5791e-12	2.91028e-10
SNX30	0.759864	-0.0124513	7.90804	9.8095e-12	3.72117e-10	16.2782	SNX30	41	7.9511	7.65029e-12	2.92849e-10
MDK	1.63248	0.0775285	7.91863	9.34505e-12	3.59959e-10	16.326	MDK	2	7.93346	8.29758e-12	3.16644e-10
TRPM7	0.448201	-0.0719274	7.90243	1.00653e-11	3.79402e-10	16.2528	TRPM7	23	7.92953	8.44871e-12	3.21416e-10
HSCB	0.444511	0.0983698	7.90585	9.90872e-12	3.74647e-10	16.2683	HSCB	20	7.92411	8.66229e-12	3.27843e-10
DGKD	0.828627	-0.0550806	7.89106	1.06032e-11	3.98459e-10	16.2015	DGKD	23	7.92389	8.67084e-12	3.27843e-10
DLG5	-0.777557	-0.0599096	-7.9133	9.57606e-12	3.67709e-10	16.3019	DLG5	7	-7.91477	9.04239e-12	3.40846e-10
HDAC4	-0.652172	-0.0304131	-7.86682	1.18486e-11	4.41227e-10	16.092	HDAC4	39	-7.91126	9.18941e-12	3.45331e-10
PFKL	0.696513	0.124114	7.84465	1.31142e-11	4.82525e-10	15.992	PFKL	169	7.90619	9.40629e-12	3.52407e-10
CD9	1.66072	-0.524718	7.86511	1.19418e-11	4.43357e-10	16.0843	CD9	51	7.90245	9.56959e-12	3.57439e-10
CDK6	-0.720754	-0.0485115	-7.84467	1.31128e-11	4.82525e-10	15.9921	CDK6	103	-7.9003	9.66484e-12	3.59906e-10
PRKCD	1.04119	-0.20209	7.84249	1.32446e-11	4.8587e-10	15.9823	PRKCD	64	7.88471	1.03828e-11	3.84634e-10
DARS2	0.512073	0.0476547	7.81215	1.52176e-11	5.52893e-10	15.8454	DARS2	89	7.88454	1.03913e-11	3.84634e-10
ASAP2	0.905608	-0.0489661	7.83516	1.36963e-11	4.99469e-10	15.9492	ASAP2	32	7.8726	1.09775e-11	4.05114e-10
KCNK5	-1.71859	-0.137417	-8.18556	1.21302e-11	4.49e-10	16.2117	KCNK5	1	-8.18491	1.12815e-11	4.15091e-10
MBTPS1	-0.401693	-0.027611	-7.9096	9.73979e-12	3.72117e-10	16.2852	MBTPS1	10	-7.86223	1.15138e-11	4.22377e-10
PLCB3	0.559503	0.0466435	7.79536	1.6432e-11	5.91511e-10	15.7698	PLCB3	77	7.85865	1.17043e-11	4.28091e-10
TBC1D24	0.509923	0.0429161	7.908	9.81163e-12	3.72117e-10	16.278	TBC1D24	6	7.85244	1.20436e-11	4.39201e-10
CD72	1.37207	-0.0486726	7.81167	1.5251e-11	5.52893e-10	15.8433	CD72	12	7.84113	1.26858e-11	4.61254e-10
GRID2IP	1.14403	-0.0833489	7.80952	1.54018e-11	5.56724e-10	15.8336	GRID2IP	15	7.83905	1.28074e-11	4.64307e-10
EXOC4	-0.258364	0.0576712	-7.63251	3.45754e-11	1.16124e-09	15.037	EXOC4	138	-7.83802	1.28685e-11	4.65154e-10
TBC1D10A	-0.495407	-0.0161471	-7.88921	1.06937e-11	4.00642e-10	16.1931	TBC1D10A	6	-7.82893	1.34171e-11	4.83226e-10
TMEM38A	1.39924	-0.0990981	7.96728	1.35993e-11	4.97405e-10	16.0206	TMEM38A	1	7.95639	1.34469e-11	4.83226e-10
DCTN1	-0.250292	0.0229503	-7.56898	4.61895e-11	1.49517e-09	14.7518	DCTN1	268	-7.81574	1.42554e-11	5.10792e-10
TRBC2	-1.117	-0.470014	-7.79499	1.64602e-11	5.91511e-10	15.7681	TRBC2	5	-7.80803	1.47694e-11	5.27674e-10
SMARCAD1	-0.389911	-0.0139949	-7.70266	2.51021e-11	8.79002e-10	15.3523	SMARCAD1	105	-7.80497	1.49779e-11	5.33578e-10
AIP	-0.25675	0.0436726	-7.5841	4.31131e-11	1.41333e-09	14.8196	AIP	149	-7.79286	1.5835e-11	5.62483e-10
STAT3	-0.815792	0.056132	-7.73866	2.12952e-11	7.54265e-10	15.5144	STAT3	137	-7.79054	1.6004e-11	5.66287e-10
CYTH3	0.935673	-0.125245	7.78622	1.71337e-11	6.13924e-10	15.7286	CYTH3	5	7.79014	1.60339e-11	5.66287e-10
GNA11	0.901375	0.0814331	7.75383	1.98689e-11	7.07813e-10	15.5827	GNA11	13	7.77765	1.69795e-11	5.9797e-10
ARHGAP17	0.689455	0.0585924	7.72052	2.31355e-11	8.12446e-10	15.4327	ARHGAP17	98	7.77594	1.71135e-11	6.00973e-10
COQ2	1.01729	-0.152162	7.92447	1.77688e-11	6.34836e-10	15.7641	COQ2	2	7.89827	1.87766e-11	6.57502e-10
EGLN1	0.67593	0.209645	7.72177	2.30041e-11	8.1014e-10	15.4383	EGLN1	25	7.7549	1.88486e-11	6.58152e-10
NUBP1	0.381757	0.0680815	7.74089	2.10797e-11	7.48785e-10	15.5244	NUBP1	20	7.75379	1.89445e-11	6.59632e-10
BRD2	-0.348512	-0.015241	-7.65978	3.0531e-11	1.04245e-09	15.1595	BRD2	57	-7.74829	1.94284e-11	6.73784e-10
SEPTIN1	-0.731547	-0.0617978	-7.69356	2.61675e-11	9.11131e-10	15.3114	SEPTIN1	118	-7.74794	1.94603e-11	6.73784e-10
WASHC2A	0.312915	0.0538148	7.69582	2.58991e-11	9.04341e-10	15.3216	WASHC2A	30	7.74344	1.98656e-11	6.85891e-10
CDC25B	-0.687582	-0.479157	-7.7279	2.23687e-11	7.90019e-10	15.4659	CDC25B	11	-7.73893	2.0281e-11	6.98279e-10
FLOT1	0.684551	0.0534493	7.66988	2.91557e-11	1.00104e-09	15.2049	FLOT1	88	7.72378	2.17407e-11	7.4645e-10
EVL	-1.13763	-0.0810963	-7.67738	2.81736e-11	9.7274e-10	15.2386	EVL	212	-7.72149	2.19703e-11	7.5224e-10
CXADR	-1.99372	-0.168291	-7.80784	2.73448e-11	9.46776e-10	15.3325	CXADR	1	-7.82298	2.41873e-11	8.25852e-10
DGKA	-0.832215	0.0822032	-7.64977	3.19573e-11	1.08216e-09	15.1145	DGKA	96	-7.69774	2.44977e-11	8.3414e-10
HPS4	0.685851	0.0594401	7.65831	3.07353e-11	1.04365e-09	15.1529	HPS4	21	7.68715	2.57153e-11	8.71016e-10
SMYD4	-0.326828	0.0279169	-7.66253	3.01497e-11	1.03229e-09	15.1719	SMYD4	24	-7.6871	2.5722e-11	8.71016e-10
MED12L	-1.09599	-0.00735644	-7.67568	2.8393e-11	9.77575e-10	15.231	MED12L	4	-7.68409	2.60791e-11	8.80686e-10
PHF11	0.818562	-0.0229623	7.65904	3.06335e-11	1.04306e-09	15.1562	PHF11	15	7.68345	2.61557e-11	8.80861e-10
KANK2	1.08603	0.0256035	7.63933	3.35163e-11	1.12875e-09	15.0676	KANK2	27	7.6736	2.73634e-11	9.19024e-10
SNX6	0.285644	0.0950349	7.51142	6.00267e-11	1.90203e-09	14.4937	SNX6	100	7.66075	2.90214e-11	9.72058e-10
NIF3L1	-0.3901	0.0724525	-7.59441	4.11344e-11	1.36296e-09	14.8659	NIF3L1	44	-7.65816	2.93689e-11	9.81032e-10
FAM3C	0.640039	-0.0714876	7.60781	3.86984e-11	1.29267e-09	14.926	FAM3C	38	7.65	3.04862e-11	1.0156e-09
STAT6	0.477567	0.128535	7.58947	4.20719e-11	1.38657e-09	14.8437	STAT6	47	7.64535	3.11423e-11	1.03466e-09
UBN1	-0.319639	0.133095	-7.59221	4.15488e-11	1.373e-09	14.856	UBN1	32	-7.64428	3.12961e-11	1.03698e-09
PEBP1	0.570134	0.0948708	7.56856	4.62775e-11	1.49517e-09	14.7499	PEBP1	208	7.63995	3.19218e-11	1.0534e-09
FPGS	0.659072	-0.110624	7.59907	4.0271e-11	1.33795e-09	14.8868	FPGS	36	7.63967	3.19628e-11	1.0534e-09
FLOT2	0.652075	0.0384356	7.57983	4.39606e-11	1.43729e-09	14.8005	FLOT2	97	7.63573	3.25452e-11	1.06974e-09
FHL2	-1.77228	-0.144056	-7.72363	3.95299e-11	1.31688e-09	14.9695	FHL2	2	-7.74192	3.45414e-11	1.13233e-09
SCARB2	0.896558	0.100825	7.57186	4.55861e-11	1.48257e-09	14.7647	SCARB2	50	7.61239	3.62152e-11	1.18406e-09
SLC44A2	0.855091	0.119312	7.56749	4.65025e-11	1.49658e-09	14.7451	SLC44A2	30	7.60294	3.78141e-11	1.23306e-09
RBM4B	0.375716	0.0149728	7.69163	2.63988e-11	9.16596e-10	15.3027	RBM4B	7	7.59541	3.91406e-11	1.27295e-09
ACTR1A	-0.289955	-0.0450482	-7.46511	7.41004e-11	2.29488e-09	14.2864	ACTR1A	64	-7.5801	4.19796e-11	1.36169e-09
MEAK7	0.617154	0.180637	7.54511	5.14945e-11	1.65292e-09	14.6447	MEAK7	21	7.57248	4.34687e-11	1.40629e-09
TPST1	1.07087	-0.334113	7.56828	4.63374e-11	1.49517e-09	14.7486	TPST1	3	7.57014	4.39363e-11	1.41769e-09
RAB32	-1.55954	-0.684081	-7.54275	5.205e-11	1.66641e-09	14.6341	RAB32	5	-7.56627	4.47191e-11	1.43795e-09
ARSD	0.739382	-0.117585	7.61976	3.66463e-11	1.22745e-09	14.9797	ARSD	2	7.56589	4.47975e-11	1.43795e-09
TRABD	0.459639	0.0220138	7.50913	6.06558e-11	1.91703e-09	14.4835	TRABD	46	7.56493	4.49942e-11	1.44051e-09
UNKL	0.377032	0.102391	7.64907	3.20598e-11	1.08266e-09	15.1114	UNKL	7	7.55565	4.69453e-11	1.49909e-09
PSAP	-0.693228	0.179721	-7.49644	6.42604e-11	2.02459e-09	14.4266	PSAP	214	-7.55472	4.71445e-11	1.50156e-09
NSUN4	0.331932	0.071349	7.57856	4.42165e-11	1.44183e-09	14.7947	NSUN4	14	7.54766	4.86894e-11	1.54677e-09
JDP2	1.02354	-0.456694	7.70541	4.28084e-11	1.40708e-09	14.8911	JDP2	1	7.65914	4.96869e-11	1.5744e-09
KLHL36	0.676486	0.204165	7.5297	5.5235e-11	1.75924e-09	14.5757	KLHL36	11	7.54089	5.02204e-11	1.58722e-09
DBR1	-0.248506	0.0614422	-7.39462	1.0206e-10	3.00237e-09	13.9713	DBR1	66	-7.53928	5.05915e-11	1.59486e-09
HEATR6	-0.51666	-0.105101	-7.49264	6.53822e-11	2.05064e-09	14.4096	HEATR6	36	-7.53653	5.12307e-11	1.61089e-09
ACAA2	1.04818	0.048494	7.49097	6.58784e-11	2.05574e-09	14.4022	ACAA2	140	7.53399	5.18292e-11	1.62557e-09
ERGIC1	0.668427	-0.137218	7.49188	6.56082e-11	2.0525e-09	14.4062	ERGIC1	34	7.53047	5.26686e-11	1.6477e-09
FAIM	0.821228	-0.253057	7.49601	6.43874e-11	2.02459e-09	14.4247	FAIM	21	7.52596	5.37643e-11	1.67772e-09
CENPV	-1.0519	0.0124492	-7.48976	6.62445e-11	2.06194e-09	14.3967	CENPV	24	-7.5223	5.46712e-11	1.70171e-09
ICOS	-1.46654	-0.409122	-7.78253	5.85517e-11	1.86007e-09	14.654	ICOS	1	-7.772	5.73433e-11	1.78039e-09
RAB11FIP1	-0.822128	-0.109132	-7.46295	7.48301e-11	2.30701e-09	14.2767	RAB11FIP1	51	-7.50412	5.94034e-11	1.83971e-09
DNAJC9	-0.397496	0.0248296	-7.39702	1.00958e-10	2.99856e-09	13.982	DNAJC9	159	-7.49772	6.1167e-11	1.88958e-09
TCAF1	-0.61176	0.0511244	-7.45561	7.73705e-11	2.37231e-09	14.2439	TCAF1	30	-7.49202	6.27768e-11	1.92752e-09
CD82	-1.35372	-0.339245	-7.45932	7.60746e-11	2.33839e-09	14.2605	CD82	23	-7.49185	6.2827e-11	1.92752e-09
FBXO25	-0.939305	-0.250824	-7.53443	5.4059e-11	1.72625e-09	14.5968	FBXO25	1	-7.49172	6.2864e-11	1.92752e-09
IL7R	1.19884	-0.231458	7.46947	7.26457e-11	2.25549e-09	14.3059	IL7R	7	7.49078	6.31356e-11	1.93104e-09
SNX22	1.43732	-0.216388	7.46285	7.48666e-11	2.30701e-09	14.2763	SNX22	3	7.47911	6.65881e-11	2.0316e-09
DHX16	-0.250066	-0.0241695	-7.28396	1.6853e-10	4.57555e-09	13.4778	DHX16	141	-7.4766	6.73541e-11	2.04989e-09
SURF4	-0.442019	-0.075534	-7.43346	8.55619e-11	2.59124e-09	14.1448	SURF4	30	-7.47262	6.85909e-11	2.08239e-09
FERMT3	0.388583	0.126887	7.35887	1.20029e-10	3.49759e-09	13.8117	FERMT3	269	7.47094	6.91189e-11	2.09327e-09
NLRP1	0.658827	0.04006	7.4361	8.45395e-11	2.57292e-09	14.1567	NLRP1	15	7.4555	7.4162e-11	2.24049e-09
PFKM	0.758208	0.0324228	7.39812	1.00453e-10	2.99801e-09	13.9869	PFKM	107	7.44703	7.70821e-11	2.32075e-09
CASTOR2	-0.63567	0.0607989	-7.43511	8.49229e-11	2.57823e-09	14.1522	CASTOR2	12	-7.44671	7.71952e-11	2.32075e-09
GSN	1.16173	0.0765023	7.39984	9.96703e-11	2.98914e-09	13.9946	GSN	86	7.4389	7.99931e-11	2.39901e-09
PRKAR2A	0.853412	0.0262792	7.39754	1.00718e-10	2.99856e-09	13.9843	PRKAR2A	54	7.43817	8.02595e-11	2.40116e-09
GDI2	0.285392	0.0148659	7.24701	1.9919e-10	5.34906e-09	13.3133	GDI2	544	7.43617	8.09944e-11	2.41442e-09
SNX4	0.774366	-0.228377	7.39542	1.01691e-10	3.00237e-09	13.9749	SNX4	46	7.4359	8.10943e-11	2.41442e-09
GIPC1	-0.461288	0.00844084	-7.39818	1.00426e-10	2.99801e-09	13.9872	GIPC1	28	-7.43369	8.19147e-11	2.43296e-09
JMJD1C	0.436777	0.00450581	7.34758	1.26334e-10	3.6383e-09	13.7613	JMJD1C	104	7.42698	8.44591e-11	2.50251e-09
MAPKAPK3	-0.783069	0.053006	-7.39477	1.01991e-10	3.00237e-09	13.9719	MAPKAPK3	24	-7.42625	8.4739e-11	2.50478e-09
LZTS2	0.587385	-0.0625695	7.44685	8.05098e-11	2.46244e-09	14.2047	LZTS2	6	7.42258	8.61697e-11	2.54097e-09
ABI1	0.494209	0.0303081	7.35939	1.1975e-10	3.49759e-09	13.814	ABI1	61	7.41772	8.80985e-11	2.59165e-09
POC1A	-0.473715	-0.103814	-7.42108	9.05079e-11	2.72763e-09	14.0895	POC1A	11	-7.41064	9.09891e-11	2.67031e-09
LRRFIP1	0.404289	0.0434553	7.3018	1.55457e-10	4.30642e-09	13.5572	LRRFIP1	285	7.40653	9.27083e-11	2.7082e-09
HACE1	-0.657787	0.0278739	-7.38387	1.07162e-10	3.14496e-09	13.9233	HACE1	17	-7.4065	9.27195e-11	2.7082e-09
NIN	0.44282	0.0976817	7.32167	1.42076e-10	3.99129e-09	13.6458	NIN	116	7.40144	9.48838e-11	2.76487e-09
CLCN6	0.489448	0.159165	7.39502	1.01876e-10	3.00237e-09	13.9731	CLCN6	14	7.40016	9.54354e-11	2.76823e-09
ABCD3	-0.42562	-0.0889758	-7.32155	1.42153e-10	3.99129e-09	13.6452	ABCD3	93	-7.40013	9.54485e-11	2.76823e-09
MAP2K3	0.551083	0.0461784	7.35735	1.20863e-10	3.51358e-09	13.8049	MAP2K3	34	7.39738	9.66553e-11	2.79665e-09
RFESD	-0.840451	0.167881	-7.42449	8.91197e-11	2.69238e-09	14.1047	RFESD	2	-7.39442	9.79655e-11	2.82792e-09
ASRGL1	-1.41575	-0.696463	-7.35208	1.23785e-10	3.58163e-09	13.7814	ASRGL1	9	-7.37869	1.05238e-10	3.03074e-09
PRKCH	-1.29347	-0.535903	-7.34904	1.25501e-10	3.62277e-09	13.7678	PRKCH	12	-7.37678	1.06158e-10	3.05014e-09
TMX4	0.667749	-0.0304244	7.34628	1.2708e-10	3.65125e-09	13.7555	TMX4	23	7.3761	1.06485e-10	3.05095e-09
THYN1	-0.413873	0.153139	-7.29805	1.58117e-10	4.36008e-09	13.5405	THYN1	83	-7.37566	1.06701e-10	3.05095e-09
RAB9A	0.585849	-0.101334	7.33684	1.32635e-10	3.77565e-09	13.7134	RAB9A	33	7.37519	1.06929e-10	3.05095e-09
LRRC8B	0.493728	0.0169662	7.40086	9.92107e-11	2.98261e-09	13.9992	LRRC8B	7	7.36574	1.11629e-10	3.17768e-09
TIFA	0.786152	-0.258895	7.33817	1.31837e-10	3.76164e-09	13.7194	TIFA	13	7.35892	1.15151e-10	3.27038e-09
PCK2	0.621671	-0.0499648	7.30128	1.55822e-10	4.30642e-09	13.5549	PCK2	126	7.35823	1.15509e-10	3.27301e-09
HHIP	-1.62145	-0.324812	-7.81586	1.22648e-10	3.55709e-09	14.0147	HHIP	1	-7.80674	1.17424e-10	3.31965e-09
PELO	-0.349749	0.0284944	-7.30629	1.52322e-10	4.23819e-09	13.5773	PELO	31	-7.35026	1.19776e-10	3.37841e-09
ARMC7	-0.332437	0.0331451	-7.44509	8.11578e-11	2.47612e-09	14.1968	ARMC7	8	-7.34786	1.21092e-10	3.40772e-09
VPS45	-0.264259	0.0906645	-7.22917	2.15918e-10	5.72344e-09	13.234	VPS45	59	-7.34426	1.23088e-10	3.456e-09
RBMX2	-0.300329	-0.0292126	-7.34149	1.29869e-10	3.71408e-09	13.7342	RBMX2	19	-7.33875	1.26213e-10	3.5357e-09
CBFA2T2	-0.548233	0.0107785	-7.3245	1.40266e-10	3.97736e-09	13.6584	CBFA2T2	15	-7.33818	1.26544e-10	3.53692e-09
ARL14EP	0.316439	0.0474351	7.32183	1.41971e-10	3.99129e-09	13.6465	ARL14EP	21	7.3327	1.29735e-10	3.61421e-09
NOL4L	-0.746436	-0.0600031	-7.32166	1.4208e-10	3.99129e-09	13.6457	NOL4L	9	-7.33243	1.29896e-10	3.61421e-09
RAI14	1.3177	-0.128242	7.29308	1.61716e-10	4.43944e-09	13.5184	RAI14	23	7.32487	1.34436e-10	3.7321e-09
STMN3	-0.978471	-0.322915	-7.3084	1.50878e-10	4.20752e-09	13.5866	STMN3	6	-7.32127	1.36656e-10	3.78522e-09
TRIP12	-0.307442	-0.000287568	-7.17698	2.73305e-10	7.04762e-09	13.0022	TRIP12	199	-7.31989	1.37517e-10	3.80052e-09
CD2	-1.85816	-0.573321	-7.30131	1.55801e-10	4.30642e-09	13.555	CD2	1	-7.31593	1.40015e-10	3.8572e-09
ACSS2	0.928117	0.0987645	7.28565	1.67246e-10	4.57258e-09	13.4853	ACSS2	21	7.31565	1.40194e-10	3.8572e-09
FAM76A	-0.339436	0.048723	-7.31571	1.45963e-10	4.07967e-09	13.6192	FAM76A	17	-7.31089	1.43255e-10	3.93264e-09
FAM49A	0.889315	0.00555448	7.28403	1.68476e-10	4.57555e-09	13.4781	FAM49A	15	7.30941	1.44226e-10	3.95051e-09
RGS10	-0.887298	-0.219214	-7.27219	1.77752e-10	4.80475e-09	13.4254	RGS10	23	-7.30301	1.48482e-10	4.05806e-09
PSD4	-0.70007	-0.0197538	-7.26056	1.87355e-10	5.05324e-09	13.3736	PSD4	44	-7.30102	1.49832e-10	4.08589e-09
ZNF449	-0.756626	-0.136301	-7.4854	1.11898e-10	3.27614e-09	13.9452	ZNF449	1	-7.38257	1.66906e-10	4.54147e-09
MCCC2	0.509272	0.0352419	7.21474	2.30468e-10	6.05702e-09	13.1699	MCCC2	85	7.276	1.67861e-10	4.55738e-09
CES3	-1.30558	-0.339374	-7.38807	1.71001e-10	4.63245e-09	13.528	CES3	1	-7.37853	1.69875e-10	4.60193e-09
TSC22D4	0.469686	0.0925511	7.23354	2.11701e-10	5.6481e-09	13.2534	TSC22D4	31	7.27192	1.71001e-10	4.61731e-09
ABCC10	-0.635489	-0.13656	-7.34496	1.27843e-10	3.66465e-09	13.7496	ABCC10	2	-7.27167	1.71192e-10	4.61731e-09
TNS3	1.16426	-0.209757	7.23248	2.12717e-10	5.66297e-09	13.2487	TNS3	21	7.26318	1.77917e-10	4.78823e-09
ARRDC2	0.970751	-0.0291339	7.58844	1.42477e-10	3.99129e-09	13.7869	ARRDC2	1	7.51642	1.805e-10	4.84158e-09
FAM169A	-1.01536	-0.243181	-7.22554	2.19492e-10	5.79327e-09	13.2179	FAM169A	34	-7.25978	1.80685e-10	4.84158e-09
METTL7A	1.08549	0.303777	7.23356	2.11679e-10	5.6481e-09	13.2535	METTL7A	11	7.25809	1.82077e-10	4.86828e-09
HS6ST1	-0.933464	-0.212706	-7.29401	1.61037e-10	4.43066e-09	13.5225	HS6ST1	1	-7.25638	1.835e-10	4.89573e-09
TBC1D22A	0.306565	0.0935593	7.19365	2.53496e-10	6.59197e-09	13.0762	TBC1D22A	33	7.24513	1.93107e-10	5.14091e-09
GNB1L	-0.461859	0.149091	-7.21894	2.26132e-10	5.95579e-09	13.1886	GNB1L	20	-7.23914	1.98425e-10	5.2711e-09
CARD8	0.642924	-0.0814463	7.2046	2.41274e-10	6.31411e-09	13.1248	CARD8	26	7.23639	2.00921e-10	5.32591e-09
NDFIP1	-1.182	-0.429325	-7.24622	1.99908e-10	5.35666e-09	13.3098	NDFIP1	1	-7.2354	2.01827e-10	5.33845e-09
IRF2	0.425508	-0.0495089	7.28557	1.67308e-10	4.57258e-09	13.4849	IRF2	7	7.23092	2.05969e-10	5.43634e-09
RGP1	0.363643	0.0231275	7.25314	1.93744e-10	5.21416e-09	13.3406	RGP1	12	7.22481	2.11757e-10	5.57716e-09
RAP1GAP	-1.29575	-0.0915411	-7.31248	2.37586e-10	6.23082e-09	13.2045	RAP1GAP	3	-7.3244	2.15201e-10	5.65581e-09
NAV1	1.28808	-0.175063	7.18156	2.67718e-10	6.918e-09	13.0225	NAV1	47	7.21616	2.20225e-10	5.77552e-09
LENG9	0.891116	-0.0914818	7.19586	2.50987e-10	6.54052e-09	13.086	LENG9	9	7.21335	2.23044e-10	5.83703e-09
NDST1	0.619558	-0.122579	7.23189	2.13279e-10	5.66569e-09	13.2461	NDST1	4	7.19713	2.40061e-10	6.26905e-09
PRDM2	0.426592	0.153528	7.1506	3.07849e-10	7.88888e-09	12.8852	PRDM2	34	7.19355	2.43981e-10	6.35796e-09
OPN5	-1.17132	-0.160141	-7.64308	2.16626e-10	5.72991e-09	13.4465	OPN5	1	-7.58915	2.48905e-10	6.47258e-09
FAM102A	-1.15953	-0.584651	-7.18376	2.65073e-10	6.86405e-09	13.0323	FAM102A	2	-7.18554	2.52996e-10	6.56512e-09
JOSD2	-0.783537	-0.0590327	-7.20122	2.44986e-10	6.39766e-09	13.1098	JOSD2	3	-7.18223	2.56823e-10	6.63808e-09
DCTN2	-0.258662	0.00632604	-7.02021	5.5363e-10	1.32763e-08	12.3082	DCTN2	133	-7.18218	2.56885e-10	6.63808e-09
ITGB2	-1.01791	-0.0333036	-7.1357	3.29248e-10	8.35042e-09	12.8191	ITGB2	153	-7.17658	2.63472e-10	6.79404e-09
SLC2A5	1.53092	-0.102517	7.1474	3.12331e-10	7.97058e-09	12.871	SLC2A5	11	7.17553	2.64734e-10	6.81235e-09
NDFIP2	-1.43431	-0.0833331	-7.2761	2.78286e-10	7.16107e-09	13.0489	NDFIP2	1	-7.27554	2.6635e-10	6.83965e-09
NEK6	1.01294	-0.129799	7.15122	3.06993e-10	7.88333e-09	12.8879	NEK6	7	7.16836	2.73466e-10	7.00779e-09
PACSIN3	0.99879	0.0482916	7.1322	3.34474e-10	8.46556e-09	12.8036	PACSIN3	28	7.1645	2.78287e-10	7.11651e-09
LIG1	-0.401433	-0.0563751	-7.07083	4.40962e-10	1.08273e-08	12.5319	LIG1	196	-7.16372	2.79274e-10	7.12699e-09
NOTCH3	-1.35001	0.263098	-7.13603	3.28749e-10	8.35042e-09	12.8206	NOTCH3	10	-7.16242	2.80925e-10	7.1543e-09
KIF21B	-0.620695	-0.109953	-7.12409	3.46931e-10	8.74757e-09	12.7677	KIF21B	33	-7.16045	2.83435e-10	7.20334e-09
VRK2	0.723138	-0.188081	7.12402	3.47036e-10	8.74757e-09	12.7674	VRK2	27	7.15614	2.89017e-10	7.33009e-09
SELPLG	-0.796062	-0.318619	-7.18425	2.64487e-10	6.86331e-09	13.0345	SELPLG	2	-7.15252	2.93793e-10	7.43591e-09
NT5E	1.20801	0.00423972	7.11669	3.58687e-10	9.00444e-09	12.7349	NT5E	11	7.14249	3.07431e-10	7.76515e-09
PLEKHA8	-0.869901	-0.122972	-7.14975	3.0904e-10	7.90295e-09	12.8814	PLEKHA8	3	-7.14097	3.09553e-10	7.80277e-09
RASSF7	-0.344183	0.0422922	-7.32434	1.40366e-10	3.97736e-09	13.6577	RASSF7	4	-7.13837	3.13214e-10	7.87893e-09
ANKRD13A	0.373584	0.0921776	7.05861	4.65877e-10	1.13936e-08	12.4779	ANKRD13A	73	7.13602	3.16565e-10	7.94701e-09
RAB44	-1.42375	-0.93152	-7.22419	3.48659e-10	8.77055e-09	12.8272	RAB44	2	-7.23475	3.18212e-10	7.97213e-09
GSTM3	-1.5542	-0.143709	-7.10164	3.83846e-10	9.53888e-09	12.6683	GSTM3	20	-7.13231	3.21915e-10	8.04852e-09
MAPK13	1.17201	-0.0983075	7.10371	3.80292e-10	9.46967e-09	12.6774	MAPK13	5	7.12044	3.39672e-10	8.4753e-09
APOB	-0.875231	-0.165153	-7.08613	4.1161e-10	1.0144e-08	12.5996	APOB	25	-7.11714	3.44781e-10	8.5854e-09
DNAJB5	-0.721799	-0.258877	-7.11001	3.69648e-10	9.22324e-09	12.7053	DNAJB5	7	-7.11324	3.50906e-10	8.7203e-09
MLF2	-0.374878	0.0335381	-7.09176	4.01316e-10	9.93298e-09	12.6245	MLF2	21	-7.10926	3.57272e-10	8.86062e-09
TCF3	0.586439	-0.0721108	7.04984	4.84618e-10	1.18051e-08	12.4391	TCF3	79	7.10079	3.71217e-10	9.188e-09
KLHDC9	1.18997	-0.0295425	8.87456	1.6825e-10	4.57555e-09	13.9553	KLHDC9	1	8.5284	3.7272e-10	9.20671e-09
CRIM1	1.41008	-0.0378258	7.09037	4.03838e-10	9.97536e-09	12.6183	CRIM1	1	7.09351	3.83624e-10	9.44556e-09
PPP1R18	0.769088	-0.0196145	7.04883	4.8682e-10	1.18354e-08	12.4346	PPP1R18	102	7.09334	3.83922e-10	9.44556e-09
GAS2L1	-0.843384	-0.17572	-7.08576	4.12309e-10	1.0144e-08	12.5979	GAS2L1	5	-7.08878	3.9192e-10	9.62312e-09
UBE2R2	-0.32261	-0.0147742	-7.09734	3.91358e-10	9.70599e-09	12.6492	UBE2R2	16	-7.08553	3.97703e-10	9.74569e-09
BAG3	-1.10366	-0.136694	-7.05466	4.74217e-10	1.15747e-08	12.4604	BAG3	13	-7.08072	4.06445e-10	9.94016e-09
PHACTR1	0.749445	-0.376697	7.11593	3.59917e-10	9.01695e-09	12.7315	PHACTR1	2	7.07785	4.11745e-10	1.00498e-08
HSPBP1	-0.428488	-0.085861	-7.00392	5.95657e-10	1.40653e-08	12.2363	HSPBP1	82	-7.07199	4.22782e-10	1.02988e-08
ALDH3A2	1.12303	-0.21411	7.03617	5.15316e-10	1.24789e-08	12.3787	ALDH3A2	44	7.07042	4.258e-10	1.03519e-08
DAGLB	0.930264	-0.201977	7.03471	5.18714e-10	1.25366e-08	12.3723	DAGLB	36	7.06876	4.28986e-10	1.04088e-08
FMNL1	-0.581547	-0.0416452	-7.00668	5.88326e-10	1.39188e-08	12.2485	FMNL1	182	-7.06565	4.35054e-10	1.05353e-08
UCKL1	-0.217523	0.0409292	-6.94793	7.65722e-10	1.76088e-08	11.9895	UCKL1	48	-7.06406	4.38192e-10	1.05732e-08
GNAQ	-0.71483	-0.075567	-7.02777	5.3516e-10	1.28836e-08	12.3416	GNAQ	37	-7.06399	4.38334e-10	1.05732e-08
FBXW4	-0.593031	-0.0324379	-7.13742	3.26706e-10	8.32019e-09	12.8267	FBXW4	2	-7.05771	4.50931e-10	1.08558e-08
FGFR1OP	-0.364865	-0.00111545	-7.01769	5.59941e-10	1.34016e-08	12.2971	FGFR1OP	28	-7.05242	4.61828e-10	1.10965e-08
NUCB1	0.763887	-0.007644	7.00719	5.86989e-10	1.39188e-08	12.2507	NUCB1	91	7.05072	4.65387e-10	1.11602e-08
RAB33A	-1.10894	-0.128246	-7.01623	5.63629e-10	1.34637e-08	12.2906	RAB33A	12	-7.04155	4.8502e-10	1.16085e-08
SPRYD7	0.53571	-0.010561	7.06802	4.46554e-10	1.09428e-08	12.5195	SPRYD7	6	7.04051	4.87307e-10	1.16406e-08
PGK1	-0.570699	0.293135	-6.97149	6.88958e-10	1.60228e-08	12.0933	PGK1	797	-7.03769	4.93556e-10	1.17671e-08
CDKN1A	1.0081	-0.0662973	7.02165	5.50071e-10	1.32167e-08	12.3146	CDKN1A	5	7.03347	5.0304e-10	1.197e-08
CCDC92	-0.511957	0.0950504	-7.03731	5.12695e-10	1.24399e-08	12.3837	CCDC92	10	-7.03257	5.05066e-10	1.19951e-08
STK38	0.620295	-0.00374842	6.97996	6.63295e-10	1.54844e-08	12.1306	STK38	70	7.0266	5.18845e-10	1.22938e-08
COQ9	0.367838	0.240446	6.99175	6.29117e-10	1.47144e-08	12.1826	COQ9	28	7.02627	5.19637e-10	1.22938e-08
PDLIM5	-1.14429	-0.483289	-6.99537	6.18964e-10	1.45045e-08	12.1986	PDLIM5	22	-7.02542	5.21611e-10	1.23168e-08
PROSER2	1.13541	-0.0518097	7.00708	5.87274e-10	1.39188e-08	12.2503	PROSER2	5	7.02304	5.27245e-10	1.24261e-08
NBR1	-0.67073	0.032034	-6.99857	6.10129e-10	1.4352e-08	12.2127	NBR1	10	-7.00903	5.6162e-10	1.32109e-08
STK11IP	0.416485	0.0692432	6.97035	6.92516e-10	1.60752e-08	12.0883	STK11IP	31	7.0084	5.63209e-10	1.32231e-08
CEP170	0.479364	0.0355646	6.93516	8.10836e-10	1.84739e-08	11.9333	CEP170	188	7.00609	5.6909e-10	1.33119e-08
RPS6KA1	0.561684	0.114059	6.95762	7.33173e-10	1.69234e-08	12.0322	RPS6KA1	64	7.00607	5.69154e-10	1.33119e-08
AK2	0.56049	-0.0181821	6.94276	7.83663e-10	1.7921e-08	11.9668	AK2	249	7.00496	5.72004e-10	1.33533e-08
CAMK2D	0.9924	0.0256366	6.96608	7.05883e-10	1.63547e-08	12.0695	CAMK2D	45	7.00084	5.82723e-10	1.35778e-08
ELOVL5	-0.844888	-0.153945	-6.97871	6.67001e-10	1.55415e-08	12.1252	ELOVL5	11	-6.99839	5.89181e-10	1.37023e-08
ST6GALNAC4	0.930971	-0.131386	7.0033	5.97322e-10	1.40776e-08	12.2336	ST6GALNAC4	2	6.99117	6.08657e-10	1.41286e-08
PXK	0.620989	-0.0664819	6.95088	7.55679e-10	1.74103e-08	12.0025	PXK	34	6.98667	6.21107e-10	1.43905e-08
RFX5	0.439942	0.0931275	6.93238	8.20998e-10	1.86365e-08	11.9211	RFX5	43	6.98043	6.38806e-10	1.47728e-08
GLIPR2	-1.40502	-0.00427247	-6.94567	7.73528e-10	1.77221e-08	11.9796	GLIPR2	16	-6.97449	6.56116e-10	1.51447e-08
CLGN	-1.35185	-0.610197	-6.93872	7.98008e-10	1.82153e-08	11.949	CLGN	39	-6.97116	6.6601e-10	1.53444e-08
WDYHV1	-0.51218	-0.0167903	-6.99797	6.11776e-10	1.43633e-08	12.2101	WDYHV1	6	-6.96656	6.7996e-10	1.56365e-08
IGFBP7	1.49957	-0.609831	6.94742	7.67484e-10	1.76164e-08	11.9873	IGFBP7	3	6.96578	6.82328e-10	1.56618e-08
ARFGAP3	-0.466437	0.0421838	-6.90271	9.37595e-10	2.10575e-08	11.7906	ARFGAP3	70	-6.9601	7e-10	1.60376e-08
SH2B2	0.789478	-0.0932932	6.96043	7.2401e-10	1.67432e-08	12.0446	SH2B2	4	6.95446	7.17994e-10	1.64193e-08
FLNA	-0.588811	-0.00909896	-6.88476	1.01601e-09	2.25099e-08	11.7117	FLNA	936	-6.94749	7.4085e-10	1.69106e-08
NCAPD3	-0.410544	0.00280166	-6.87087	1.0811e-09	2.37958e-08	11.6507	NCAPD3	100	-6.94386	7.53045e-10	1.71417e-08
ZEB1	-0.82933	-0.226674	-6.91018	9.06773e-10	2.04331e-08	11.8234	ZEB1	34	-6.94365	7.53758e-10	1.71417e-08
PLCL1	-1.50206	-0.541502	-6.91973	8.68838e-10	1.96141e-08	11.8654	PLCL1	4	-6.94049	7.64518e-10	1.73396e-08
PGK2	-0.538049	0.288713	-6.93374	8.16002e-10	1.85573e-08	11.9271	PGK2	12	-6.94027	7.6527e-10	1.73396e-08
SPG7	0.364549	0.119139	6.8845	1.0172e-09	2.25099e-08	11.7105	SPG7	37	6.93286	7.91198e-10	1.78942e-08
PDIA3	0.282645	-0.00971477	6.76819	1.70939e-09	3.57117e-08	11.2008	PDIA3	771	6.93188	7.94699e-10	1.79404e-08
DHPS	-0.565845	-0.0650065	-6.89214	9.83028e-10	2.19507e-08	11.7441	DHPS	39	-6.93124	7.96977e-10	1.79589e-08
AFG3L2	0.331151	0.0793884	6.8247	1.32871e-09	2.85326e-08	11.4482	AFG3L2	144	6.92958	8.02962e-10	1.80608e-08
EHBP1L1	0.46066	-0.000936753	6.86016	1.13409e-09	2.48564e-08	11.6037	EHBP1L1	126	6.92772	8.09701e-10	1.81792e-08
UPF3B	0.309386	0.111913	6.83328	1.27881e-09	2.75615e-08	11.4858	UPF3B	73	6.92473	8.20655e-10	1.83817e-08
KLHL2	0.665772	-0.0393316	7.01441	5.68249e-10	1.35217e-08	12.2826	KLHL2	1	6.92444	8.21703e-10	1.83817e-08
SAC3D1	-0.477439	-0.0496274	-6.91975	8.68762e-10	1.96141e-08	11.8655	SAC3D1	13	-6.92344	8.25415e-10	1.84313e-08
TCF20	-0.345882	0.0800823	-6.81912	1.36222e-09	2.92012e-08	11.4237	TCF20	121	-6.91327	8.63984e-10	1.92576e-08
PHTF1	0.690825	-0.0805511	7.11233	5.66252e-10	1.35002e-08	12.3505	PHTF1	1	7.00394	8.68026e-10	1.93128e-08
ITM2A	-1.63852	-1.04973	-6.88005	1.03765e-09	2.29212e-08	11.691	ITM2A	16	-6.90919	8.79954e-10	1.95315e-08
SH3RF1	1.01615	0.0982784	6.89131	9.86683e-10	2.19925e-08	11.7405	SH3RF1	7	6.90892	8.81024e-10	1.95315e-08
ATP2A3	-0.729203	0.115795	-6.85927	1.13865e-09	2.48848e-08	11.5998	ATP2A3	112	-6.90385	9.01327e-10	1.99457e-08
KCTD9	-0.381551	-0.0113103	-6.89749	9.59789e-10	2.15097e-08	11.7676	KCTD9	16	-6.89965	9.18481e-10	2.02889e-08
DUSP22	0.72147	-0.237133	6.88834	9.99893e-10	2.22066e-08	11.7274	DUSP22	8	6.89665	9.30917e-10	2.05268e-08
RNF149	-0.465111	0.0290807	-6.92643	8.43139e-10	1.91039e-08	11.8949	RNF149	7	-6.89438	9.40452e-10	2.07e-08
SYS1	-0.46682	-0.00549802	-7.11052	3.68811e-10	9.22103e-09	12.7075	SYS1	1	-6.89229	9.49345e-10	2.08585e-08
GIMAP7	-1.68217	-0.51587	-6.85992	1.13533e-09	2.48564e-08	11.6026	GIMAP7	13	-6.88838	9.66132e-10	2.11896e-08
KIAA0930	0.418931	0.054878	6.87422	1.06505e-09	2.34845e-08	11.6654	KIAA0930	18	6.88724	9.71098e-10	2.12607e-08
SLC7A1	-0.511398	-0.0808753	-6.89452	9.72593e-10	2.17571e-08	11.7546	SLC7A1	8	-6.88077	9.997e-10	2.1848e-08
ZADH2	0.597418	0.0929217	6.85517	1.15967e-09	2.52992e-08	11.5818	ZADH2	18	6.87713	1.01613e-09	2.21678e-08
ZCCHC14	0.850515	-0.0175357	7.63427	5.34034e-10	1.28816e-08	12.6534	ZCCHC14	1	7.43276	1.02224e-09	2.22258e-08
NFKBIA	0.487746	-0.0191118	6.8676	1.09702e-09	2.41032e-08	11.6363	NFKBIA	14	6.87576	1.02239e-09	2.22258e-08
C18orf32	-0.578979	0.232314	-6.88896	9.97113e-10	2.21849e-08	11.7301	C18orf32	6	-6.87278	1.03617e-09	2.24856e-08
S100A13	1.15102	-0.194071	6.84401	1.21894e-09	2.64518e-08	11.5328	S100A13	13	6.87	1.04916e-09	2.27275e-08
ACO1	-0.516997	0.19891	-6.80609	1.44372e-09	3.06288e-08	11.3667	ACO1	107	-6.86316	1.08186e-09	2.33947e-08
OGFRL1	1.35344	-0.418825	6.83197	1.28629e-09	2.76698e-08	11.48	OGFRL1	6	6.854	1.12716e-09	2.43317e-08
CDC34	-0.392873	-0.0971092	-6.85024	1.18553e-09	2.57721e-08	11.5601	CDC34	15	-6.85061	1.14442e-09	2.4661e-08
CD1A	-1.48376	-0.288143	-6.8171	1.37452e-09	2.94137e-08	11.4149	CD1A	3	-6.83533	1.22554e-09	2.63292e-08
NF1	-0.549435	0.0106468	-6.7816	1.61027e-09	3.37555e-08	11.2595	NF1	107	-6.83522	1.2261e-09	2.63292e-08
SUV39H2	0.388787	0.0338653	6.83699	1.25776e-09	2.71985e-08	11.5021	SUV39H2	14	6.83269	1.24013e-09	2.6584e-08
DGLUCY	0.74254	0.0986336	6.79333	1.52823e-09	3.21486e-08	11.3108	DGLUCY	54	6.83144	1.24704e-09	2.66859e-08
IMPDH1	0.535343	-0.0760716	6.781	1.61459e-09	3.37886e-08	11.2568	IMPDH1	65	6.82923	1.25945e-09	2.69046e-08
CORO2A	-1.02387	-0.26053	-6.8075	1.43466e-09	3.05945e-08	11.3728	CORO2A	9	-6.8285	1.26361e-09	2.6938e-08
SEC14L2	-0.857976	0.0676062	-6.94316	1.17629e-09	2.56166e-08	11.6321	SEC14L2	2	-6.91656	1.26733e-09	2.6938e-08
GNA15	-0.972376	0.0939101	-6.79528	1.51502e-09	3.19763e-08	11.3193	GNA15	36	-6.8278	1.26757e-09	2.6938e-08
NCK1	-0.281199	0.0507534	-6.73117	2.01561e-09	4.14764e-08	11.0391	NCK1	64	-6.82473	1.28512e-09	2.7264e-08
CTR9	-0.181477	0.0279464	-6.57665	3.99907e-09	7.58346e-08	10.3668	CTR9	122	-6.82159	1.30332e-09	2.76026e-08
SUB1	-0.405787	-0.0121582	-6.73871	1.94911e-09	4.031e-08	11.072	SUB1	199	-6.82086	1.30754e-09	2.76446e-08
STXBP5	-0.994372	-0.304401	-6.80235	1.46802e-09	3.10908e-08	11.3503	STXBP5	7	-6.81951	1.31549e-09	2.77649e-08
GATAD2A	-0.203112	0.00474313	-6.65454	2.83269e-09	5.61347e-08	10.7051	GATAD2A	73	-6.817	1.33036e-09	2.80309e-08
SETDB2	0.71703	-0.0321957	6.80617	1.44325e-09	3.06288e-08	11.367	SETDB2	8	6.81464	1.34448e-09	2.82799e-08
CLSTN3	-0.77758	-0.144515	-6.81437	1.39137e-09	2.97228e-08	11.4029	CLSTN3	4	-6.80896	1.3791e-09	2.89588e-08
ATP10D	0.857267	-0.0157872	6.80696	1.43815e-09	3.0616e-08	11.3705	ATP10D	4	6.80791	1.38555e-09	2.90448e-08
C19orf53	-0.287601	0.0708404	-6.83324	1.27902e-09	2.75615e-08	11.4856	C19orf53	13	-6.7923	1.48581e-09	3.10935e-08
VAT1	-0.705025	-0.167439	-6.74872	1.8642e-09	3.8749e-08	11.1157	VAT1	89	-6.79154	1.49086e-09	3.11463e-08
NFKB1	0.695113	-0.13057	6.74406	1.90322e-09	3.94935e-08	11.0954	NFKB1	135	6.78989	1.50187e-09	3.13232e-08
TBC1D20	-0.356375	0.0818594	-6.79331	1.5284e-09	3.21486e-08	11.3107	TBC1D20	14	-6.78303	1.54866e-09	3.22446e-08
USP32	-0.391915	0.00312151	-6.73564	1.97586e-09	4.07264e-08	11.0586	USP32	36	-6.77892	1.57737e-09	3.2787e-08
TRIM36	-1.21105	-0.371898	-6.75819	1.78728e-09	3.72758e-08	11.1571	TRIM36	4	-6.77387	1.61341e-09	3.34796e-08
FMNL2	1.04449	0.124649	6.74066	1.93227e-09	4.00288e-08	11.0805	FMNL2	41	6.77328	1.61765e-09	3.35111e-08
EXOC2	-0.241162	0.0473136	-6.66223	2.73763e-09	5.45138e-08	10.7386	EXOC2	61	-6.77243	1.62376e-09	3.35813e-08
BICRAL	0.4561	-0.0697134	6.78491	1.58671e-09	3.33183e-08	11.2739	BICRAL	8	6.76195	1.70161e-09	3.51325e-08
LACC1	0.871932	-0.00504652	6.79614	1.50926e-09	3.19093e-08	11.3231	LACC1	1	6.7614	1.70583e-09	3.51607e-08
GNPDA1	-1.00372	-0.195748	-6.7255	2.06703e-09	4.24637e-08	11.0143	GNPDA1	23	-6.7545	1.75917e-09	3.61995e-08
LILRB4	1.28871	-0.703834	6.73808	1.95456e-09	4.0355e-08	11.0692	LILRB4	3	6.75255	1.77457e-09	3.64557e-08
PGPEP1	-0.819892	-0.0819434	-6.75211	1.83623e-09	3.82321e-08	11.1305	PGPEP1	4	-6.75087	1.78795e-09	3.66693e-08
GNAI1	1.40577	-0.423425	6.72129	2.1061e-09	4.31944e-08	10.9959	GNAI1	17	6.74957	1.79835e-09	3.68214e-08
SHQ1	-0.68279	-0.28696	-6.71851	2.13228e-09	4.36585e-08	10.9838	SHQ1	20	-6.74405	1.84322e-09	3.76774e-08
PPP2R1B	-0.441843	-0.042465	-6.68328	2.49356e-09	5.01397e-08	10.8302	PPP2R1B	74	-6.74114	1.86732e-09	3.81069e-08
HENMT1	-0.985655	-0.193888	-6.71458	2.16988e-09	4.43548e-08	10.9667	HENMT1	14	-6.73937	1.88211e-09	3.83453e-08
TLE4	0.995071	-0.201528	6.71335	2.1818e-09	4.45246e-08	10.9613	TLE4	13	6.73756	1.89742e-09	3.85934e-08
GALNT6	-1.33667	-0.375588	-6.70234	2.29116e-09	4.6602e-08	10.9133	GALNT6	13	-6.72907	1.97061e-09	4.0016e-08
MYO1G	-0.950653	0.00126941	-6.68687	2.45407e-09	4.95072e-08	10.8459	MYO1G	147	-6.72514	2.00552e-09	4.06579e-08
GIMAP1	-1.22534	-0.20026	-6.69113	2.40812e-09	4.87397e-08	10.8644	GIMAP1	19	-6.71936	2.05789e-09	4.16513e-08
DCTN5	-0.266403	0.154853	-6.84055	1.23793e-09	2.68168e-08	11.5177	DCTN5	8	-6.71479	2.10022e-09	4.24382e-08
FHL1	1.13033	0.233211	6.67775	2.55553e-09	5.12186e-08	10.8061	FHL1	77	6.71191	2.12736e-09	4.29162e-08
FAM118B	-0.357561	0.0885606	-6.69173	2.40168e-09	4.86893e-08	10.8671	FAM118B	22	-6.71125	2.13363e-09	4.29724e-08
MAPK7	-0.362751	0.0734391	-6.70267	2.28778e-09	4.6602e-08	10.9147	MAPK7	18	-6.71078	2.13815e-09	4.29931e-08
TREML2	-1.52475	-0.638414	-6.69662	2.35007e-09	4.77215e-08	10.8884	TREML2	1	-6.70595	2.18468e-09	4.38572e-08
CALR	-0.424981	-0.00702513	-6.61948	3.30878e-09	6.48354e-08	10.5527	CALR	1041	-6.70419	2.20189e-09	4.41309e-08
SQSTM1	0.666934	-0.0502284	6.6647	2.7078e-09	5.4007e-08	10.7493	SQSTM1	39	6.69987	2.24462e-09	4.49144e-08
MFHAS1	-0.537081	-0.0086238	-6.67939	2.537e-09	5.093e-08	10.8133	MFHAS1	17	-6.69774	2.26604e-09	4.52693e-08
PAGE5	-1.51232	-0.712248	-6.68756	2.44659e-09	4.94372e-08	10.8489	PAGE5	1	-6.69659	2.27771e-09	4.54289e-08
CHUK	-0.311452	0.0282453	-6.61842	3.32436e-09	6.49383e-08	10.5481	CHUK	55	-6.69013	2.34414e-09	4.66783e-08
RABGEF1	0.264578	0.100432	6.58478	3.8578e-09	7.36087e-08	10.4021	RABGEF1	66	6.68325	2.41714e-09	4.80542e-08
EPHB4	1.0711	-0.0327866	6.65816	2.78754e-09	5.54181e-08	10.7209	EPHB4	9	6.67984	2.45407e-09	4.87098e-08
VPS37C	0.508779	-0.0177769	6.68402	2.48537e-09	5.00566e-08	10.8334	VPS37C	9	6.6781	2.47318e-09	4.90104e-08
SSNA1	-0.58382	-0.224073	-6.6656	2.69703e-09	5.38794e-08	10.7532	SSNA1	12	-6.67691	2.48636e-09	4.91923e-08
TARS2	0.34707	0.0527088	6.60728	3.49233e-09	6.77896e-08	10.4997	TARS2	55	6.6705	2.5583e-09	5.05345e-08
TRAF3IP2	0.835074	0.0191684	6.64168	2.99882e-09	5.92363e-08	10.6492	TRAF3IP2	15	6.66519	2.61947e-09	5.16602e-08
RESF1	-0.437782	0.0398044	-6.62685	3.20243e-09	6.29556e-08	10.5847	RESF1	28	-6.65842	2.69961e-09	5.30908e-08
PTPN12	0.688837	-0.00932435	6.62115	3.2843e-09	6.44622e-08	10.56	PTPN12	50	6.65833	2.70063e-09	5.30908e-08
MAPT	-0.995324	0.150749	-6.64694	2.92978e-09	5.79654e-08	10.672	MAPT	4	-6.65624	2.72594e-09	5.35032e-08
CD2AP	-0.450412	0.0222165	-6.58505	3.85327e-09	7.36087e-08	10.4032	CD2AP	116	-6.64748	2.83417e-09	5.55389e-08
SETDB1	0.254029	0.0289667	6.52483	5.02724e-09	9.18011e-08	10.1424	SETDB1	92	6.6457	2.85674e-09	5.58923e-08
CTNNBL1	-0.198871	0.0248931	-6.43781	7.37386e-09	1.27476e-07	9.7669	CTNNBL1	142	-6.64316	2.88915e-09	5.63895e-08
GOLIM4	0.897603	-0.259777	6.61132	3.43047e-09	6.67994e-08	10.5172	GOLIM4	35	6.64299	2.8913e-09	5.63895e-08
TBC1D14	0.816129	-0.147962	6.61384	3.39244e-09	6.61634e-08	10.5282	TBC1D14	19	6.63981	2.93254e-09	5.70382e-08
TMEM237	-0.548832	-0.161891	-6.6571	2.80063e-09	5.55886e-08	10.7163	TMEM237	6	-6.63971	2.93381e-09	5.70382e-08
ACTR10	-0.277326	0.0605531	-6.57566	4.01663e-09	7.60507e-08	10.3625	ACTR10	40	-6.6371	2.96803e-09	5.75157e-08
RHBDD2	-0.338688	0.0358065	-6.90264	9.37902e-10	2.10575e-08	11.7903	RHBDD2	2	-6.63689	2.97085e-09	5.75157e-08
FCHO2	1.29526	-0.361724	6.61913	3.31383e-09	6.48354e-08	10.5512	FCHO2	4	6.63677	2.97237e-09	5.75157e-08
XXYLT1	-0.395492	0.0608399	-6.60832	3.47639e-09	6.75866e-08	10.5042	XXYLT1	25	-6.63538	2.99081e-09	5.77818e-08
DUSP1	1.40454	-0.569549	6.62798	3.18657e-09	6.27438e-08	10.5896	DUSP1	1	6.63408	3.0082e-09	5.80268e-08
FAM241A	1.30631	-0.288453	6.60241	3.56838e-09	6.91569e-08	10.4786	FAM241A	5	6.62219	3.17132e-09	6.10777e-08
POLR1B	0.32789	-0.00578338	6.52721	4.97474e-09	9.11125e-08	10.1527	POLR1B	98	6.61286	3.30549e-09	6.35587e-08
ZC3H12C	1.08626	-0.238368	6.59982	3.60955e-09	6.97357e-08	10.4673	ZC3H12C	4	6.61252	3.31045e-09	6.35587e-08
SNX25	0.831036	-0.13485	6.58964	3.7758e-09	7.26153e-08	10.4232	SNX25	13	6.61126	3.32907e-09	6.38168e-08
TSC22D3	1.04251	0.00902966	6.60204	3.57421e-09	6.91612e-08	10.477	TSC22D3	3	6.60912	3.36079e-09	6.43247e-08
PRKCA	-1.15204	-0.322022	-6.57347	4.05557e-09	7.65528e-08	10.353	PRKCA	29	-6.60325	3.44958e-09	6.59218e-08
KIF7	-1.01539	-0.16114	-6.58119	3.91965e-09	7.4554e-08	10.3865	KIF7	9	-6.60193	3.46986e-09	6.62066e-08
SIKE1	-0.440917	0.0417315	-6.57036	4.11176e-09	7.74947e-08	10.3396	SIKE1	27	-6.60038	3.49374e-09	6.65593e-08
PDE4A	0.814992	-0.208382	6.58183	3.90851e-09	7.44611e-08	10.3893	PDE4A	9	6.59783	3.53359e-09	6.71653e-08
ALKBH7	-0.368022	-0.119695	-6.63437	3.09753e-09	6.10883e-08	10.6174	ALKBH7	9	-6.59765	3.53645e-09	6.71653e-08
ECT2	-0.506961	-0.185291	-6.55409	4.41813e-09	8.22626e-08	10.2691	ECT2	50	-6.59703	3.54612e-09	6.72454e-08
TTC39C	0.702326	0.0305347	6.55482	4.404e-09	8.21237e-08	10.2722	TTC39C	49	6.591	3.64229e-09	6.8963e-08
C16orf86	1.07619	0.280526	6.58788	3.80537e-09	7.29471e-08	10.4155	C16orf86	2	6.59017	3.6558e-09	6.90675e-08
IGLL1	1.43622	-0.499653	6.5622	4.26265e-09	7.9729e-08	10.3042	IGLL1	17	6.58996	3.65916e-09	6.90675e-08
FAF1	-0.291799	0.0554852	-6.48069	6.10652e-09	1.09244e-07	9.95175	FAF1	133	-6.58962	3.66462e-09	6.90675e-08
NANS	0.376068	-0.0304053	6.51476	5.25547e-09	9.56853e-08	10.0989	NANS	108	6.58846	3.68362e-09	6.93195e-08
CD1B	-1.38809	-0.4443	-6.56381	4.23257e-09	7.92867e-08	10.3112	CD1B	7	-6.587	3.70749e-09	6.96624e-08
DENND1B	-0.626872	-0.184585	-6.5739	4.04793e-09	7.65257e-08	10.3549	DENND1B	11	-6.58586	3.72636e-09	6.99104e-08
TRAF3IP3	-0.829323	0.0746196	-6.54743	4.54992e-09	8.42076e-08	10.2402	TRAF3IP3	60	-6.5829	3.77554e-09	7.07253e-08
RGS18	-1.79274	-0.324263	-6.74964	4.19997e-09	7.87958e-08	10.4544	RGS18	1	-6.76343	3.79656e-09	7.10112e-08
USP43	0.839279	-0.0622172	6.56962	4.1252e-09	7.76293e-08	10.3364	USP43	6	6.57946	3.83364e-09	7.15961e-08
ZGPAT	-0.311511	-0.203367	-6.67286	2.61152e-09	5.22558e-08	10.7849	ZGPAT	7	-6.57894	3.84248e-09	7.16528e-08
LARGE1	1.32756	-0.328225	6.7661	3.92549e-09	7.4554e-08	10.5261	LARGE1	1	6.75979	3.85405e-09	7.17599e-08
PPP3CC	0.561173	-0.173597	6.55263	4.44664e-09	8.26686e-08	10.2628	PPP3CC	21	6.57688	3.8776e-09	7.2064e-08
TRIO	0.91018	-0.103133	6.54084	4.68436e-09	8.64363e-08	10.2117	TRIO	82	6.57662	3.88208e-09	7.2064e-08
NOL9	0.249393	0.0838715	6.5094	5.38099e-09	9.7682e-08	10.0757	NOL9	38	6.57272	3.94982e-09	7.32112e-08
OXSR1	-0.460542	0.198751	-6.51778	5.18586e-09	9.45575e-08	10.112	OXSR1	77	-6.57146	3.97194e-09	7.35107e-08
ELF1	0.485791	-0.164244	6.52759	4.96634e-09	9.1094e-08	10.1544	ELF1	48	6.57065	3.98617e-09	7.36634e-08
TFDP2	-0.773243	-0.0806058	-6.55064	4.48598e-09	8.31491e-08	10.2541	TFDP2	12	-6.56987	3.99999e-09	7.38082e-08
SPRY2	0.895652	-0.357259	6.56129	4.27984e-09	7.99293e-08	10.3003	SPRY2	3	6.56086	4.16301e-09	7.65893e-08
ME3	1.04689	0.0410388	6.53711	4.76203e-09	8.77382e-08	10.1956	ME3	12	6.56085	4.16314e-09	7.65893e-08
DENND3	0.892942	-0.0697493	6.52515	5.01998e-09	9.18011e-08	10.1438	DENND3	49	6.5585	4.20682e-09	7.72775e-08
OSBPL8	-0.346311	0.015378	-6.47794	6.18075e-09	1.10411e-07	9.9399	OSBPL8	103	-6.55754	4.22467e-09	7.74901e-08
MLLT3	-1.0622	-0.0409317	-6.53455	4.81619e-09	8.86036e-08	10.1845	MLLT3	5	-6.54952	4.37737e-09	8.01715e-08
SELENON	0.822334	-0.0321324	6.94198	3.623e-09	6.98859e-08	10.6942	SELENON	2	6.87449	4.44438e-09	8.12781e-08
SCARF1	0.782417	-0.090576	6.58917	3.7837e-09	7.26446e-08	10.4211	SCARF1	1	6.5451	4.46393e-09	8.15147e-08
SSB	0.291126	0.0889425	6.41382	8.19289e-09	1.40063e-07	9.66368	SSB	443	6.54381	4.48957e-09	8.17418e-08
STAM2	0.412619	-0.0338476	6.4972	5.67828e-09	1.02752e-07	10.023	STAM2	45	6.54349	4.49584e-09	8.17418e-08
GTF3C3	-0.300855	0.0337658	-6.45917	6.713e-09	1.17535e-07	9.85893	GTF3C3	75	-6.54347	4.49626e-09	8.17418e-08
JAM2	1.19163	-0.0398947	6.53352	4.83805e-09	8.8873e-08	10.18	JAM2	2	6.54108	4.54413e-09	8.24904e-08
HTATSF1	-0.4138	0.0387373	-6.46249	6.6157e-09	1.16161e-07	9.87324	HTATSF1	337	-6.54022	4.56147e-09	8.26833e-08
HELLS	-0.409279	-0.123079	-6.46938	6.41804e-09	1.13472e-07	9.90297	HELLS	132	-6.53823	4.60182e-09	8.32923e-08
STAM	-0.425673	0.00418136	-6.48365	6.02727e-09	1.08298e-07	9.96455	STAM	65	-6.53749	4.61702e-09	8.34448e-08
RBMS1	-0.598564	-0.119667	-6.56887	4.13896e-09	7.77696e-08	10.3331	RBMS1	3	-6.53199	4.73069e-09	8.5374e-08
DCTN4	-0.237786	0.0236238	-6.46581	6.51975e-09	1.14803e-07	9.88756	DCTN4	38	-6.53163	4.73819e-09	8.53843e-08
MAGEE1	-1.06849	0.00780993	-7.12413	3.77628e-09	7.26153e-08	10.7411	MAGEE1	1	-7.04031	4.74659e-09	8.54109e-08
IRF8	1.06354	-0.161431	6.49444	5.74776e-09	1.03729e-07	10.0111	IRF8	32	6.52444	4.89146e-09	8.78709e-08
PPP5C	0.227709	0.0378791	6.36127	1.03153e-08	1.71319e-07	9.43798	PPP5C	162	6.52392	4.90264e-09	8.78709e-08
PACSIN2	0.306844	0.0483796	6.42537	7.78787e-09	1.33882e-07	9.71336	PACSIN2	130	6.52383	4.90469e-09	8.78709e-08
ACSL5	0.858391	-0.22264	6.48833	5.90455e-09	1.06403e-07	9.98472	ACSL5	50	6.5219	4.94666e-09	8.84943e-08
ECPAS	0.71352	-0.181512	6.47559	6.24496e-09	1.11397e-07	9.92977	ECPAS	182	6.51898	5.01095e-09	8.95145e-08
IRF7	0.911725	-0.404026	6.49692	5.68526e-09	1.02752e-07	10.0218	IRF7	6	6.50993	5.21551e-09	9.30339e-08
FKBP4	-0.853343	-0.231195	-6.46911	6.42571e-09	1.13472e-07	9.9018	FKBP4	275	-6.50903	5.23638e-09	9.32712e-08
LRP12	-0.756414	-0.0756575	-6.55219	4.45536e-09	8.2706e-08	10.2608	LRP12	1	-6.50421	5.34903e-09	9.51402e-08
NDRG3	-0.439053	0.0439458	-6.46447	6.55829e-09	1.15317e-07	9.88178	NDRG3	35	-6.50183	5.40561e-09	9.6008e-08
SLC6A6	-0.680027	-0.276671	-6.66787	3.83794e-09	7.34573e-08	10.4712	SLC6A6	1	-6.57841	5.43193e-09	9.63367e-08
RRM2B	0.583942	-0.0388602	6.46617	6.50925e-09	1.14783e-07	9.88914	RRM2B	33	6.49889	5.47634e-09	9.69848e-08
CKAP4	1.0266	-0.0483462	6.45445	6.85372e-09	1.19828e-07	9.83859	CKAP4	108	6.48902	5.72047e-09	1.01163e-07
MAPKAPK2	0.546378	-0.023752	6.44943	7.00662e-09	1.21982e-07	9.81697	MAPKAPK2	47	6.48851	5.73334e-09	1.01245e-07
GLRX	0.431058	0.0557394	6.44253	7.22245e-09	1.25209e-07	9.78723	GLRX	44	6.48616	5.79302e-09	1.02153e-07
ZNF771	0.711662	0.0196742	6.47237	6.33423e-09	1.12826e-07	9.91586	ZNF771	9	6.48459	5.83342e-09	1.02718e-07
LIN28B	-1.47535	-0.473184	-6.45986	6.69241e-09	1.17341e-07	9.86194	LIN28B	7	-6.48355	5.86039e-09	1.03046e-07
MPST	0.457081	0.0331369	6.44164	7.25067e-09	1.25522e-07	9.78341	MPST	43	6.4831	5.87199e-09	1.03056e-07
IRX3	-1.91298	-0.371206	-7.24229	6.42264e-09	1.13472e-07	10.3298	IRX3	1	-7.23942	5.8777e-09	1.03056e-07
ITPRIP	0.574436	0.0231726	6.45379	6.87351e-09	1.20004e-07	9.83577	ITPRIP	24	6.48072	5.9339e-09	1.03894e-07
PRICKLE1	1.06217	-0.180133	6.79212	6.00816e-09	1.08112e-07	10.1895	PRICKLE1	2	6.77298	6.13703e-09	1.07298e-07
AMZ2	-0.362334	-0.0874653	-6.54395	4.6204e-09	8.53838e-08	10.2252	AMZ2	6	-6.47181	6.17199e-09	1.07747e-07
INPP4A	-0.521389	-0.0016847	-6.42858	7.67881e-09	1.32191e-07	9.72718	INPP4A	57	-6.47151	6.18017e-09	1.07747e-07
TANC2	-0.954601	0.185413	-6.45248	6.91342e-09	1.2053e-07	9.83009	TANC2	8	-6.47071	6.20193e-09	1.07973e-07
MAP3K1	0.702661	-0.209475	6.43424	7.49014e-09	1.29305e-07	9.75156	MAP3K1	31	6.46487	6.36396e-09	1.10533e-07
DCTN6	-0.213861	0.0196918	-6.51147	5.33219e-09	9.6939e-08	10.0847	DCTN6	16	-6.46476	6.36691e-09	1.10533e-07
LSM1	-0.3089	-0.0189784	-6.46951	6.41447e-09	1.13472e-07	9.90352	LSM1	16	-6.46243	6.43284e-09	1.11521e-07
FBRS	-0.335038	0.0434656	-6.49886	5.63676e-09	1.02175e-07	10.0302	FBRS	10	-6.46192	6.44742e-09	1.11616e-07
ACP2	-0.686247	0.0744258	-6.47201	6.34412e-09	1.12839e-07	9.91433	ACP2	4	-6.46154	6.4581e-09	1.11645e-07
TUBB4B	0.324578	0.0336244	6.48258	6.05585e-09	1.08546e-07	9.95991	TUBB4B	12	6.45711	6.58551e-09	1.13688e-07
NCAPG2	-0.355189	0.0126211	-6.37704	9.62693e-09	1.60788e-07	9.50563	NCAPG2	113	-6.4534	6.69406e-09	1.154e-07
NRBP1	0.309735	0.114137	6.38071	9.47321e-09	1.58942e-07	9.5214	NRBP1	61	6.4517	6.7447e-09	1.16027e-07
TBKBP1	0.731445	-0.195583	6.43205	7.56258e-09	1.30372e-07	9.74213	TBKBP1	13	6.45141	6.75309e-09	1.16027e-07
RNASEL	0.499714	0.0589877	6.40785	8.41021e-09	1.43579e-07	9.63803	RNASEL	55	6.45123	6.75867e-09	1.16027e-07
SPATA5	-0.289476	0.00756983	-6.35089	1.07944e-08	1.77166e-07	9.3935	SPATA5	113	-6.45088	6.76884e-09	1.1604e-07
FARP2	0.462445	-0.151702	6.44726	7.07366e-09	1.22976e-07	9.80763	FARP2	12	6.4495	6.81033e-09	1.16589e-07
VPREB1	1.02954	-0.410831	6.42136	7.92608e-09	1.3569e-07	9.69612	VPREB1	18	6.44762	6.86697e-09	1.17396e-07
TOR4A	1.0051	-0.25512	6.42257	7.88416e-09	1.3516e-07	9.70132	TOR4A	13	6.4463	6.90717e-09	1.17919e-07
ACOT7	-0.416004	-0.03178	-6.3806	9.47772e-09	1.58942e-07	9.52094	ACOT7	119	-6.44472	6.95538e-09	1.18578e-07
SLFN13	1.08916	-0.233399	6.42313	7.86478e-09	1.35016e-07	9.70373	SLFN13	8	6.44379	6.98395e-09	1.18901e-07
LAP3	0.499062	-0.0832156	6.38398	9.33826e-09	1.57031e-07	9.53546	LAP3	189	6.44123	7.06305e-09	1.20082e-07
LMNB2	0.193102	0.0803518	6.19911	2.09206e-08	3.17571e-07	8.7456	LMNB2	444	6.44058	7.08337e-09	1.20261e-07
ADCY6	0.930322	-0.121914	6.44484	7.14943e-09	1.24118e-07	9.79719	ADCY6	2	6.43969	7.11113e-09	1.20566e-07
STAU2	-0.470755	-0.145121	-6.38412	9.33269e-09	1.57031e-07	9.53605	STAU2	63	-6.43149	7.3729e-09	1.24833e-07
HPF1	-0.596843	0.0775794	-6.39252	8.99532e-09	1.52722e-07	9.57212	HPF1	50	-6.4302	7.41492e-09	1.25372e-07
SLC27A3	1.00054	-0.143389	6.40377	8.56237e-09	1.45773e-07	9.62046	SLC27A3	17	6.42942	7.44027e-09	1.25628e-07
PYCARD	0.853088	-0.164313	6.39216	9.00951e-09	1.52753e-07	9.57058	PYCARD	73	6.42716	7.51472e-09	1.26712e-07
BAIAP2	-1.17376	-0.57716	-6.39677	8.8293e-09	1.5011e-07	9.59037	BAIAP2	15	-6.42254	7.66947e-09	1.29145e-07
HDDC2	0.403596	0.0868229	6.37389	9.76061e-09	1.628e-07	9.49212	HDDC2	45	6.4194	7.77592e-09	1.30617e-07
HIP1	0.850048	-0.287942	6.38508	9.29358e-09	1.56922e-07	9.54016	HIP1	63	6.41934	7.7781e-09	1.30617e-07
RAB34	1.1381	0.326738	6.38783	9.18229e-09	1.55468e-07	9.55196	RAB34	33	6.41731	7.84812e-09	1.31614e-07
HINT2	-0.33951	0.0398139	-6.35916	1.0411e-08	1.72249e-07	9.42893	HINT2	48	-6.414	7.9631e-09	1.3336e-07
TGFBR2	0.870251	-0.15399	6.37996	9.50426e-09	1.59171e-07	9.5182	TGFBR2	21	6.40651	8.22997e-09	1.37643e-07
ERLIN2	0.421738	0.0962923	6.36086	1.03337e-08	1.71319e-07	9.43623	ERLIN2	46	6.40533	8.27295e-09	1.38174e-07
MYO18A	0.674673	-0.0680391	6.35656	1.05302e-08	1.73988e-07	9.41778	MYO18A	551	6.40336	8.34493e-09	1.39188e-07
RCSD1	0.690537	0.112475	6.3549	1.06068e-08	1.74785e-07	9.41068	RCSD1	216	6.39851	8.52484e-09	1.41996e-07
USP6NL	0.378554	-0.0815192	6.38542	9.27979e-09	1.56904e-07	9.54162	USP6NL	17	6.39382	8.70248e-09	1.44568e-07
BBC3	0.682033	-0.0657873	6.40384	8.55973e-09	1.45773e-07	9.62076	BBC3	4	6.39381	8.70271e-09	1.44568e-07
FDFT1	-0.708051	-0.304223	-6.35162	1.076e-08	1.76837e-07	9.39663	FDFT1	96	-6.3909	8.81491e-09	1.46235e-07
TPD52L2	0.392001	0.0433618	6.32282	1.22041e-08	1.97412e-07	9.27327	TPD52L2	121	6.3904	8.83424e-09	1.46359e-07
RALGAPB	-0.373337	0.181512	-6.32613	1.2029e-08	1.95091e-07	9.28743	RALGAPB	59	-6.38188	9.17168e-09	1.51745e-07
TUSC3	-1.41155	-0.4825	-6.37253	9.81902e-09	1.63553e-07	9.48628	TUSC3	1	-6.38029	9.23565e-09	1.52499e-07
LLGL2	0.738347	0.1613	6.36465	1.01634e-08	1.69061e-07	9.4525	LLGL2	10	6.38014	9.24199e-09	1.52499e-07
PDZD11	-0.258813	-0.0741653	-6.46925	6.42189e-09	1.13472e-07	9.90238	PDZD11	9	-6.37545	9.43435e-09	1.55465e-07
TJP2	1.01615	-0.354836	6.38412	9.33248e-09	1.57031e-07	9.53607	TJP2	1	6.3727	9.54904e-09	1.57145e-07
IKBKE	-0.711381	-0.2231	-6.35302	1.06946e-08	1.75996e-07	9.4026	IKBKE	12	-6.37059	9.63774e-09	1.58393e-07
GID4	-0.35423	0.114835	-6.37759	9.6036e-09	1.60616e-07	9.50801	GID4	13	-6.36751	9.76935e-09	1.60342e-07
CD58	1.05669	-0.0368405	6.3357	1.15359e-08	1.88084e-07	9.32842	CD58	14	6.36019	1.00881e-08	1.6532e-07
UBE2H	-0.579224	0.0869017	-6.35534	1.05862e-08	1.74679e-07	9.41258	UBE2H	9	-6.35994	1.00995e-08	1.6532e-07
GABARAPL1	-1.20233	-0.491545	-6.43523	1.03409e-08	1.71319e-07	9.49933	GABARAPL1	1	-6.43112	1.01863e-08	1.6652e-07
ARID5A	0.738085	-0.182843	6.33859	1.13914e-08	1.85974e-07	9.34077	ARID5A	8	6.35016	1.05422e-08	1.7211e-07
SLC41A1	0.508587	0.047376	6.48247	6.05869e-09	1.08546e-07	9.95945	SLC41A1	1	6.3493	1.05822e-08	1.72534e-07
USE1	-0.270087	0.122975	-6.29772	1.36182e-08	2.17997e-07	9.1659	USE1	33	-6.34257	1.08993e-08	1.7747e-07
FRMD4B	0.920885	-0.356706	6.32389	1.21475e-08	1.96755e-07	9.27782	FRMD4B	8	6.34143	1.0954e-08	1.78126e-07
ERO1A	-0.505497	0.0390722	-6.28704	1.42675e-08	2.26917e-07	9.12029	ERO1A	109	-6.33728	1.11553e-08	1.8116e-07
SCD	-0.997222	-0.357459	-6.30803	1.30188e-08	2.09764e-07	9.20998	SCD	27	-6.33629	1.12035e-08	1.81703e-07
LIME1	-1.10637	-0.585723	-6.32089	1.23075e-08	1.98824e-07	9.26501	LIME1	4	-6.33491	1.12719e-08	1.82571e-07
BCL2	0.747892	-0.10273	6.31449	1.26567e-08	2.04197e-07	9.23761	BCL2	12	6.33309	1.13619e-08	1.83789e-07
HLX	1.05114	-0.158951	6.41901	1.10776e-08	1.81572e-07	9.4319	HLX	1	6.40422	1.14212e-08	1.84506e-07
TRAPPC5	-0.201875	0.0802267	-6.32925	1.1866e-08	1.93186e-07	9.30079	TRAPPC5	22	-6.33016	1.15088e-08	1.85677e-07
BBS9	-0.819153	-0.0171915	-6.34189	1.1228e-08	1.83793e-07	9.35493	BBS9	2	-6.3286	1.15877e-08	1.8648e-07
HLA-DPB1	0.975603	-0.280322	6.29799	1.3602e-08	2.17997e-07	9.16707	HLA-DPB1	42	6.32858	1.15888e-08	1.8648e-07
KIF3A	-0.626942	0.0107229	-6.28884	1.41564e-08	2.25732e-07	9.12795	KIF3A	39	-6.32206	1.19249e-08	1.91583e-07
PTPN22	-0.90237	-0.370586	-6.29949	1.35132e-08	2.17117e-07	9.17348	PTPN22	13	-6.32183	1.1937e-08	1.91583e-07
ARHGEF12	1.00904	-0.22102	6.29082	1.40343e-08	2.24077e-07	9.13643	ARHGEF12	24	6.31833	1.21216e-08	1.94292e-07
LRRC14B	1.23182	0.00259574	6.29167	1.39822e-08	2.23534e-07	9.14007	LRRC14B	15	6.31735	1.21736e-08	1.94873e-07
DSCC1	-0.356952	-0.00217936	-6.28166	1.46063e-08	2.31801e-07	9.09731	DSCC1	31	-6.31662	1.22126e-08	1.95244e-07
ACTR3B	0.446151	-0.00705997	6.32655	1.20068e-08	1.94987e-07	9.28924	ACTR3B	9	6.31542	1.22769e-08	1.95978e-07
CDK2	-0.286694	-0.0237783	-6.23872	1.76112e-08	2.73763e-07	8.91415	CDK2	64	-6.31509	1.22945e-08	1.95978e-07
APEX1	0.304078	0.122061	6.20799	2.0129e-08	3.08211e-07	8.78335	APEX1	295	6.31488	1.23063e-08	1.95978e-07
HSD17B12	0.472768	-0.00908692	6.2643	1.57548e-08	2.48329e-07	9.0232	HSD17B12	84	6.31416	1.23452e-08	1.96344e-07
IDI1	0.36458	-0.027042	6.25485	1.64171e-08	2.58109e-07	8.98288	IDI1	52	6.30701	1.27377e-08	2.02326e-07
ECHS1	0.527667	0.108701	6.25279	1.65646e-08	2.59833e-07	8.97413	ECHS1	159	6.30371	1.29233e-08	2.05009e-07
RAB26	0.994734	-0.183283	6.49549	1.18801e-08	1.93186e-07	9.43479	RAB26	1	6.46411	1.29842e-08	2.05711e-07
SKAP1	-1.32605	-0.299378	-6.28129	1.463e-08	2.31801e-07	9.09572	SKAP1	5	-6.30122	1.30644e-08	2.06716e-07
RTEL1	-0.465681	-0.0558273	-6.2873	1.42514e-08	2.26917e-07	9.1214	RTEL1	12	-6.29108	1.36574e-08	2.15822e-07
AARS1	0.304051	-0.0264806	6.1716	2.35732e-08	3.55646e-07	8.62878	AARS1	662	6.28493	1.40298e-08	2.21423e-07
NECTIN3	-1.11098	-0.374509	-6.26926	1.54178e-08	2.4364e-07	9.04437	NECTIN3	4	-6.28351	1.41177e-08	2.22525e-07
NIT2	0.383409	0.141533	6.21903	1.91862e-08	2.95611e-07	8.83031	NIT2	84	6.27945	1.43703e-08	2.26218e-07
NFATC3	-0.43596	0.0659325	-6.23868	1.76145e-08	2.73763e-07	8.91397	NFATC3	39	-6.27696	1.45279e-08	2.28407e-07
ZC3HAV1	-0.170174	0.00700063	-6.04275	4.11382e-08	5.78846e-07	8.08416	ZC3HAV1	149	-6.27427	1.46996e-08	2.30811e-07
DCTN3	-0.231843	0.086619	-6.25803	1.61909e-08	2.54878e-07	8.99647	DCTN3	23	-6.27085	1.49207e-08	2.33985e-07
ERI1	-0.235431	0.0194496	-6.25273	1.65689e-08	2.59833e-07	8.97387	ERI1	24	-6.27056	1.49398e-08	2.33987e-07
SLC35F2	0.506182	-0.169112	6.3039	1.32554e-08	2.13298e-07	9.19234	SLC35F2	4	6.26565	1.52642e-08	2.38765e-07
IFIT5	0.645557	0.0933396	6.22832	1.84265e-08	2.84975e-07	8.86985	IFIT5	47	6.26275	1.54588e-08	2.41502e-07
SPRYD3	0.397752	0.0552073	6.26612	1.56303e-08	2.46682e-07	9.03097	SPRYD3	12	6.26121	1.55629e-08	2.4282e-07
NIPSNAP3B	1.1465	-0.0794754	6.24014	1.75025e-08	2.72851e-07	8.92021	NIPSNAP3B	7	6.26032	1.56239e-08	2.43464e-07
DOCK5	-1.18852	-0.872603	-6.23512	1.78892e-08	2.77362e-07	8.89882	DOCK5	12	-6.25928	1.56944e-08	2.44254e-07
SIRPG	-1.85426	-1.11914	-6.31912	1.76349e-08	2.73763e-07	8.98302	SIRPG	1	-6.33606	1.59091e-08	2.47283e-07
AKAP9	0.310052	0.0446402	6.14356	2.66188e-08	3.95782e-07	8.5099	AKAP9	464	6.24958	1.63738e-08	2.54186e-07
PCYT2	0.41648	-0.0783027	6.1967	2.11406e-08	3.20515e-07	8.73537	PCYT2	70	6.24847	1.64532e-08	2.55097e-07
FXN	0.605613	0.05637	6.27649	1.49397e-08	2.36389e-07	9.07521	FXN	3	6.248	1.64872e-08	2.55304e-07
CA8	-1.40668	-0.128703	-6.22689	1.85416e-08	2.86395e-07	8.86376	CA8	5	-6.24766	1.65117e-08	2.55362e-07
DHX35	-0.200305	0.0416946	-6.15457	2.53786e-08	3.77798e-07	8.55658	DHX35	45	-6.24517	1.66923e-08	2.57831e-07
ZNF175	-0.751282	0.216011	-6.28128	1.46309e-08	2.31801e-07	9.09566	ZNF175	1	-6.24026	1.70537e-08	2.63084e-07
STIM1	-0.640031	0.0392435	-6.2027	2.05969e-08	3.13429e-07	8.76086	STIM1	62	-6.23959	1.71041e-08	2.63531e-07
MAST4	-0.658599	0.0917479	-6.29924	1.3528e-08	2.17117e-07	9.17241	MAST4	1	-6.23719	1.72838e-08	2.65968e-07
CDKN2D	-0.681616	-0.0950494	-6.22982	1.83063e-08	2.83471e-07	8.87626	CDKN2D	7	-6.23611	1.73658e-08	2.66897e-07
ZFYVE19	-0.375138	-0.0478938	-6.20738	2.01825e-08	3.08648e-07	8.78075	ZFYVE19	26	-6.23441	1.74946e-08	2.68542e-07
MYLK	1.3005	-0.442442	6.20463	2.04248e-08	3.1158e-07	8.76908	MYLK	35	6.23317	1.75898e-08	2.69667e-07
MBP	0.918008	0.0235491	6.20933	2.00118e-08	3.06798e-07	8.78907	MBP	13	6.2317	1.77031e-08	2.71066e-07
ERP29	0.394816	-0.0638877	6.15773	2.5034e-08	3.74024e-07	8.56995	ERP29	181	6.22612	1.81391e-08	2.77398e-07
NLRP3	0.99897	-0.200652	6.21799	1.92729e-08	2.96576e-07	8.82589	NLRP3	3	6.22537	1.81985e-08	2.77961e-07
PRR14	-0.524325	-0.00508168	-6.21529	1.95006e-08	2.99707e-07	8.81439	PRR14	12	-6.22449	1.8268e-08	2.78451e-07
SOBP	-1.06874	-0.59656	-6.21979	1.91224e-08	2.94998e-07	8.83356	SOBP	2	-6.2244	1.82757e-08	2.78451e-07
IL27RA	-0.832539	-0.28825	-6.25059	1.67242e-08	2.61935e-07	8.96474	IL27RA	1	-6.2229	1.83954e-08	2.79928e-07
NPLOC4	-0.197546	0.0570447	-6.06683	3.70835e-08	5.29041e-07	8.18562	NPLOC4	96	-6.21987	1.86399e-08	2.833e-07
SCRIB	0.336252	-0.0646752	6.14197	2.68023e-08	3.97551e-07	8.50318	SCRIB	124	6.21903	1.87084e-08	2.8399e-07
THOP1	0.288283	0.0555981	6.11607	2.9981e-08	4.37332e-07	8.39354	THOP1	165	6.21723	1.88559e-08	2.85877e-07
ELL3	0.803798	-0.0647536	6.24762	1.69417e-08	2.65005e-07	8.95209	ELL3	1	6.21602	1.8956e-08	2.87041e-07
MGAT4A	-0.821813	-0.171199	-6.24151	1.73983e-08	2.71801e-07	8.92606	MGAT4A	1	-6.21259	1.92412e-08	2.91002e-07
UEVLD	0.818607	0.0298529	6.18597	2.21484e-08	3.34971e-07	8.68979	UEVLD	17	6.20965	1.94893e-08	2.94394e-07
PGM2	0.379119	0.0956468	6.13511	2.761e-08	4.08059e-07	8.47413	PGM2	200	6.20755	1.96685e-08	2.96737e-07
PTGDR2	-1.36906	-1.06834	-6.47587	2.05211e-08	3.12662e-07	8.986	PTGDR2	1	-6.46977	2.00462e-08	3.02065e-07
RASA2	-0.746206	0.0553067	-6.16122	2.46586e-08	3.69759e-07	8.58474	RASA2	79	-6.19673	2.06178e-08	3.103e-07
CCDC106	0.634163	0.251982	6.18266	2.24691e-08	3.39405e-07	8.67572	CCDC106	10	6.19421	2.08448e-08	3.13333e-07
HIF1AN	-0.301792	0.0536318	-6.1626	2.45108e-08	3.67991e-07	8.59062	HIF1AN	26	-6.1891	2.13136e-08	3.1999e-07
SOWAHD	0.974563	0.102672	6.19921	2.09117e-08	3.17571e-07	8.74602	SOWAHD	1	6.18715	2.14957e-08	3.22331e-07
FRA10AC1	-0.373652	-0.0465552	-6.15652	2.51651e-08	3.75526e-07	8.56485	FRA10AC1	28	-6.18619	2.15854e-08	3.23282e-07
CDC45	-0.375279	-0.0232391	-6.13725	2.73563e-08	4.05017e-07	8.48316	CDC45	49	-6.18464	2.17314e-08	3.25075e-07
CYP2U1	-0.897408	-0.037213	-6.17096	2.36384e-08	3.56195e-07	8.62608	CYP2U1	5	-6.18178	2.20038e-08	3.2875e-07
CAMSAP2	0.884385	-0.361641	6.15526	2.53035e-08	3.77136e-07	8.55948	CAMSAP2	22	6.1814	2.20401e-08	3.28893e-07
PUS1	0.300008	0.0429545	6.10381	3.16124e-08	4.59499e-07	8.34172	PUS1	82	6.18097	2.2081e-08	3.29105e-07
FOXO3B	-0.831263	0.0255356	-6.20698	2.02175e-08	3.088e-07	8.77906	FOXO3B	1	-6.18007	2.21678e-08	3.3e-07
HLA-DMA	1.59092	-0.496779	6.1597	2.48213e-08	3.71747e-07	8.5783	HLA-DMA	2	6.177	2.24658e-08	3.33868e-07
NACC1	-0.212522	0.057203	-6.08489	3.4304e-08	4.92811e-07	8.2618	NACC1	51	-6.17684	2.24818e-08	3.33868e-07
SHISA2	-1.31636	-0.476445	-6.16876	2.38652e-08	3.59173e-07	8.61674	SHISA2	1	-6.17474	2.26882e-08	3.36528e-07
MYCBP2	0.369388	0.0248237	6.09526	3.28015e-08	4.74544e-07	8.3056	MYCBP2	318	6.17355	2.2806e-08	3.37869e-07
NIFK	0.252805	-0.0402532	6.07275	3.61481e-08	5.16293e-07	8.2106	NIFK	89	6.17297	2.28635e-08	3.38315e-07
BACE2	-1.55264	-0.199283	-6.58411	2.43904e-08	3.6663e-07	8.90918	BACE2	1	-6.58037	2.32788e-08	3.44046e-07
RTL6	-0.824124	-0.0351377	-6.53394	1.75098e-08	2.72851e-07	9.14427	RTL6	1	-6.44478	2.35247e-08	3.47264e-07
FLAD1	0.434704	-0.0451272	6.11941	2.95511e-08	4.32084e-07	8.40767	FLAD1	46	6.16019	2.41699e-08	3.56362e-07
CANT1	-0.361902	-0.0581421	-6.13712	2.73713e-08	4.05017e-07	8.48263	CANT1	21	-6.15467	2.47569e-08	3.64269e-07
BCS1L	0.346111	0.0410892	6.12976	2.82573e-08	4.15137e-07	8.45146	BCS1L	25	6.15459	2.47654e-08	3.64269e-07
PDHX	0.331139	0.0657207	6.09687	3.25747e-08	4.71816e-07	8.31239	PDHX	52	6.15132	2.51188e-08	3.69029e-07
GANC	0.660164	0.0409409	6.12705	2.85903e-08	4.19529e-07	8.44	GANC	19	6.15009	2.52541e-08	3.70573e-07
STRA6	-1.75829	-0.958472	-6.39604	2.79494e-08	4.1188e-07	8.67746	STRA6	1	-6.40927	2.53663e-08	3.71777e-07
THTPA	0.487316	0.117939	6.11802	2.97288e-08	4.34168e-07	8.4018	THTPA	20	6.13875	2.6529e-08	3.88244e-07
LANCL1	-0.263208	0.179038	-6.07296	3.61162e-08	5.16293e-07	8.21146	LANCL1	48	-6.13854	2.65528e-08	3.88244e-07
MACF1	0.479389	-0.0399623	6.0763	3.55997e-08	5.10235e-07	8.22555	MACF1	1187	6.13696	2.6735e-08	3.90445e-07
SNX18	0.549544	-0.0337184	6.12012	2.94609e-08	4.31789e-07	8.41066	SNX18	15	6.13638	2.68034e-08	3.9098e-07
RASSF2	0.610806	0.034797	6.10321	3.16946e-08	4.60151e-07	8.33918	RASSF2	39	6.13541	2.69156e-08	3.92153e-07
EOGT	0.900357	-0.25828	6.11318	3.03573e-08	4.41775e-07	8.38134	EOGT	12	6.13446	2.70268e-08	3.93309e-07
DERA	0.433908	-0.0048979	6.09197	3.32709e-08	4.80168e-07	8.29171	DERA	48	6.13336	2.71563e-08	3.94728e-07
ARHGEF40	0.84444	-0.0250755	6.11352	3.03136e-08	4.41661e-07	8.38275	ARHGEF40	11	6.13308	2.71901e-08	3.94752e-07
PYCR3	0.407282	0.155927	6.13212	2.79706e-08	4.1188e-07	8.46144	PYCR3	11	6.12621	2.80125e-08	4.06214e-07
ZMYM1	-0.566162	0.0311937	-6.09127	3.33713e-08	4.80531e-07	8.28876	ZMYM1	31	-6.12096	2.86575e-08	4.15079e-07
PYROXD1	-0.554257	-0.169927	-6.10155	3.19224e-08	4.62913e-07	8.33217	PYROXD1	17	-6.12058	2.87051e-08	4.15281e-07
HLA-B	0.80526	-0.493849	6.08091	3.48976e-08	5.00754e-07	8.24503	HLA-B	116	6.11614	2.92625e-08	4.22375e-07
TLR10	1.14409	-0.519433	6.18659	2.95391e-08	4.32084e-07	8.47148	TLR10	1	6.18192	2.9264e-08	4.22375e-07
PRELID3A	0.920831	-0.0906585	7.53019	1.12992e-08	1.84714e-07	9.90312	PRELID3A	1	7.14613	2.96866e-08	4.27973e-07
TBC1D5	0.315974	0.0693181	6.03303	4.28964e-08	6.00842e-07	8.04325	TBC1D5	96	6.10746	3.03851e-08	4.37531e-07
SYT1	0.898804	-0.0832864	6.08694	3.4001e-08	4.89027e-07	8.27048	SYT1	8	6.10411	3.08287e-08	4.43401e-07
CD1D	-1.55155	-0.586628	-6.24208	3.32508e-08	4.80168e-07	8.43263	CD1D	1	-6.25135	3.09114e-08	4.44072e-07
KIF2A	-0.156692	0.0522407	-5.86305	8.88275e-08	1.12992e-06	7.33209	KIF2A	124	-6.09616	3.19087e-08	4.57866e-07
FNBP1	-0.840052	-0.269601	-6.05934	3.82995e-08	5.43245e-07	8.15407	FNBP1	183	-6.09495	3.2077e-08	4.59746e-07
PTPRE	0.843315	-0.0246704	6.06173	3.79069e-08	5.38295e-07	8.16414	PTPRE	52	6.09289	3.23647e-08	4.6333e-07
SUMO1	-0.252395	0.0963934	-6.06343	3.76311e-08	5.34995e-07	8.17128	SUMO1	26	-6.08913	3.28957e-08	4.70386e-07
SUN2	0.570656	0.0553823	6.04388	4.09383e-08	5.76692e-07	8.08892	SUN2	160	6.08863	3.29666e-08	4.70651e-07
SLC35B3	0.525109	0.00463669	6.19419	2.13719e-08	3.23625e-07	8.72471	SLC35B3	1	6.08846	3.29906e-08	4.70651e-07
NCF1	1.33147	-0.56562	6.05833	3.84681e-08	5.43759e-07	8.14977	NCF1	32	6.08588	3.33606e-08	4.75379e-07
CPNE7	0.842951	0.0315576	6.06435	3.74821e-08	5.33492e-07	8.17516	CPNE7	9	6.08163	3.39811e-08	4.83661e-07
BBS7	-0.622858	0.0239578	-6.09172	3.33071e-08	4.80168e-07	8.29064	BBS7	4	-6.07909	3.43554e-08	4.88038e-07
NCKAP5L	-0.38998	0.101547	-6.05391	3.92063e-08	5.52925e-07	8.13119	NCKAP5L	25	-6.07901	3.43678e-08	4.88038e-07
C1orf112	-0.380627	-0.183638	-6.05852	3.84361e-08	5.43759e-07	8.15059	C1orf112	21	-6.07699	3.46693e-08	4.91753e-07
EMC9	-0.514976	-0.192836	-6.14282	2.67036e-08	3.96565e-07	8.50679	EMC9	2	-6.07589	3.48356e-08	4.93545e-07
BLVRB	0.597996	0.117951	6.0393	4.17538e-08	5.86839e-07	8.06964	BLVRB	47	6.0733	3.52274e-08	4.98522e-07
KCTD15	0.951145	-0.190128	6.05466	3.90804e-08	5.51782e-07	8.13433	KCTD15	8	6.07289	3.52898e-08	4.98833e-07
KANSL1L	0.684835	-0.0022745	6.32621	2.48692e-08	3.72012e-07	8.71864	KANSL1L	1	6.22948	3.54189e-08	5.00084e-07
CDK1	-0.371061	-0.143618	-6.00209	4.89986e-08	6.72558e-07	7.91324	CDK1	121	-6.06646	3.6285e-08	5.11581e-07
MPLKIP	-0.301252	0.0698306	-6.21323	1.96754e-08	3.02016e-07	8.80566	MPLKIP	4	-6.06626	3.63162e-08	5.11581e-07
FBXL12	-0.346566	0.0419662	-6.06591	3.72299e-08	5.30515e-07	8.18176	FBXL12	13	-6.05832	3.75845e-08	5.28842e-07
SETX	0.330117	-0.0268932	5.97655	5.46768e-08	7.41415e-07	7.80608	SETX	168	6.0558	3.79953e-08	5.34014e-07
SLC12A9	0.517135	0.0460879	6.0265	4.41188e-08	6.16563e-07	8.01578	SLC12A9	24	6.05151	3.87068e-08	5.43394e-07
NRDC	-0.273427	-0.0341247	-5.94787	6.1829e-08	8.19467e-07	7.68596	NRDC	160	-6.04931	3.90767e-08	5.47964e-07
SMARCA2	0.567068	0.045796	6.00463	4.84675e-08	6.68245e-07	7.92389	SMARCA2	93	6.04561	3.97064e-08	5.5616e-07
PIGB	0.553855	-0.00320585	6.13212	2.79695e-08	4.1188e-07	8.46148	PIGB	1	6.04272	4.02036e-08	5.62486e-07
TMIGD2	-1.44898	0.195038	-6.02577	4.4256e-08	6.1778e-07	8.01274	TMIGD2	2	-6.04118	4.0473e-08	5.65613e-07
GTF3C6	-0.279544	-0.0186125	-6.13185	2.80023e-08	4.1188e-07	8.46033	GTF3C6	7	-6.04018	4.06483e-08	5.67419e-07
KPNA5	-0.559952	0.0595817	-6.05865	3.84137e-08	5.43759e-07	8.15116	KPNA5	4	-6.03734	4.11493e-08	5.73762e-07
SLC25A19	0.380884	0.0447059	6.03754	4.20709e-08	5.90622e-07	8.06224	SLC25A19	13	6.03614	4.13628e-08	5.76089e-07
AKAP12	1.33063	-0.582375	6.00559	4.82682e-08	6.66241e-07	7.92792	AKAP12	179	6.03568	4.14443e-08	5.76571e-07
HSPB1	1.01393	-0.505461	6.00141	4.91429e-08	6.73039e-07	7.91037	HSPB1	186	6.03392	4.17611e-08	5.80324e-07
EIF2AK3	0.50057	-0.0553075	6.00736	4.79024e-08	6.62676e-07	7.93535	EIF2AK3	23	6.03129	4.22381e-08	5.86292e-07
POU2F1	0.366207	0.0699619	6.01098	4.71634e-08	6.54657e-07	7.95055	POU2F1	21	6.02877	4.26996e-08	5.92031e-07
TRIOBP	0.491971	0.163839	5.99812	4.98419e-08	6.811e-07	7.89656	TRIOBP	29	6.02676	4.30721e-08	5.96525e-07
RHOU	-1.41736	-0.227365	-6.17486	4.57203e-08	6.37498e-07	8.12264	RHOU	1	-6.18006	4.32324e-08	5.98073e-07
RILPL1	-0.911113	-0.052349	-6.02721	4.39843e-08	6.15381e-07	8.01876	RILPL1	2	-6.02517	4.33683e-08	5.9928e-07
ABCC1	-0.341422	0.122605	-5.95798	5.92094e-08	7.91556e-07	7.72826	ABCC1	93	-6.02302	4.37711e-08	6.04169e-07
BIN2	-1.35899	-0.57714	-5.99685	5.0115e-08	6.83316e-07	7.89122	BIN2	18	-6.02249	4.38728e-08	6.04895e-07
MIA2	0.291672	0.0241665	5.97409	5.52577e-08	7.47065e-07	7.79575	MIA2	39	6.02129	4.41001e-08	6.0684e-07
OTULINL	-1.26146	-0.484527	-6.091	4.57921e-08	6.37778e-07	8.04911	OTULINL	1	-6.09318	4.41123e-08	6.0684e-07
PAF1	-0.172756	-0.018102	-5.82697	1.03565e-07	1.28813e-06	7.18224	PAF1	126	-6.01952	4.4437e-08	6.10625e-07
STK10	0.579569	-0.0379262	5.97512	5.50146e-08	7.45176e-07	7.80006	STK10	182	6.01905	4.45275e-08	6.11187e-07
PFKFB2	-1.19118	-0.0252278	-5.99731	5.00159e-08	6.8272e-07	7.89315	PFKFB2	8	-6.01862	4.46102e-08	6.11641e-07
PKM	0.34678	0.166297	5.93092	6.64803e-08	8.736e-07	7.6151	PKM	1558	6.0178	4.47676e-08	6.12437e-07
L3MBTL4	1.05046	-0.465801	6.00762	4.78487e-08	6.62676e-07	7.93645	L3MBTL4	3	6.0178	4.47676e-08	6.12437e-07
HTRA2	0.323884	0.0876792	6.00404	4.85916e-08	6.69207e-07	7.92139	HTRA2	20	6.01679	4.49639e-08	6.1444e-07
WDR54	-0.48157	0.0597012	-6.01476	4.6403e-08	6.44829e-07	7.96644	WDR54	10	-6.01606	4.51047e-08	6.15682e-07
ZNF592	0.243882	0.0132857	5.93988	6.39808e-08	8.47075e-07	7.65254	ZNF592	52	6.01308	4.56887e-08	6.22964e-07
PSMF1	-0.26514	-0.00901326	-6.03443	4.26375e-08	5.97895e-07	8.04917	PSMF1	14	-6.01015	4.62683e-08	6.30169e-07
TEX10	0.267876	0.0322508	5.92482	6.82383e-08	8.91994e-07	7.58961	TEX10	84	6.00954	4.63918e-08	6.31153e-07
EVI5	0.683261	0.0146569	5.98962	5.16961e-08	7.04095e-07	7.86086	EVI5	12	6.00656	4.69911e-08	6.38603e-07
NSD3	-0.292947	0.0470591	-5.93533	6.5238e-08	8.60025e-07	7.63353	NSD3	73	-6.00628	4.70475e-08	6.38665e-07
NHSL1	0.687369	-0.237929	5.99827	4.98106e-08	6.811e-07	7.89718	NHSL1	6	6.00295	4.77265e-08	6.47169e-07
ACAP1	-0.623075	0.00143301	-5.96328	5.78798e-08	7.77153e-07	7.75045	ACAP1	90	-6.00118	4.80926e-08	6.51406e-07
FADS3	0.615121	-0.0931569	6.00173	4.90759e-08	6.72869e-07	7.9117	FADS3	6	6.00093	4.81446e-08	6.51406e-07
CDKN2AIPNL	-0.351091	-0.127284	-5.97756	5.44411e-08	7.39032e-07	7.8103	CDKN2AIPNL	23	-5.99848	4.86554e-08	6.57407e-07
FKBP8	-0.24559	0.0442219	-5.91388	7.15076e-08	9.27792e-07	7.5439	FKBP8	66	-5.99829	4.86948e-08	6.57407e-07
GLUD1	0.301863	0.0929286	5.91549	7.10153e-08	9.23349e-07	7.55064	GLUD1	121	5.9965	4.90724e-08	6.61218e-07
NAA30	-0.219474	0.0244862	-6.00597	4.81896e-08	6.65902e-07	7.92951	NAA30	19	-5.99644	4.90844e-08	6.61218e-07
TMLHE	0.647003	0.318693	5.97174	5.58172e-08	7.53563e-07	7.78591	TMLHE	22	5.99613	4.9149e-08	6.61365e-07
TMED8	-0.520187	0.0117554	-5.96918	5.6432e-08	7.60198e-07	7.77521	TMED8	23	-5.9932	4.97727e-08	6.69028e-07
MAPKBP1	0.599001	0.0350417	5.97823	5.42843e-08	7.37934e-07	7.81312	MAPKBP1	12	5.99226	4.99758e-08	6.70912e-07
SUPT6H	-0.135753	0.0182343	-5.65107	2.17816e-07	2.47675e-06	6.45706	SUPT6H	279	-5.99205	5.00218e-08	6.70912e-07
SLC35E3	0.939531	-0.207171	6.0023	4.89562e-08	6.72558e-07	7.91409	SLC35E3	1	5.99029	5.04012e-08	6.75267e-07
BCL2L1	-0.583419	0.156714	-5.97401	5.52753e-08	7.47065e-07	7.79544	BCL2L1	13	-5.98892	5.06997e-08	6.78528e-07
DCUN1D5	-0.382743	0.0441004	-5.95488	6.00003e-08	7.99528e-07	7.7153	DCUN1D5	32	-5.98756	5.09979e-08	6.81779e-07
CAMLG	-0.251453	0.0604878	-6.0097	4.74235e-08	6.57528e-07	7.94517	CAMLG	15	-5.98704	5.11108e-08	6.82477e-07
UFD1	-0.183231	0.022723	-5.86494	8.81122e-08	1.12313e-06	7.33998	UFD1	61	-5.98681	5.11609e-08	6.82477e-07
NUMA1	0.363202	0.151231	5.90525	7.41924e-08	9.60605e-07	7.5079	NUMA1	960	5.9851	5.15407e-08	6.86801e-07
MED23	-0.184538	0.0839095	-5.84368	9.64626e-08	1.21203e-06	7.25158	MED23	78	-5.98376	5.18385e-08	6.90023e-07
VSIG10	0.955545	-0.0870948	6.14681	4.88479e-08	6.71986e-07	8.05045	VSIG10	1	6.11896	5.28553e-08	7.02372e-07
NBAS	-0.266865	0.110462	-5.87849	8.31683e-08	1.06452e-06	7.39637	NBAS	150	-5.97913	5.28802e-08	7.02372e-07
WDR18	0.209575	0.0607358	5.88853	7.96803e-08	1.02413e-06	7.4382	WDR18	53	5.97811	5.31122e-08	7.04695e-07
EDEM1	0.605592	0.0238363	5.95117	6.09609e-08	8.11451e-07	7.69978	EDEM1	23	5.97581	5.36407e-08	7.10941e-07
AGGF1	-0.500089	-0.202696	-6.0156	4.6236e-08	6.43234e-07	7.96996	AGGF1	3	-5.96984	5.50373e-08	7.28668e-07
TRAPPC3	-0.223041	0.0929763	-5.88534	8.07724e-08	1.03601e-06	7.42491	TRAPPC3	54	-5.96854	5.53445e-08	7.31949e-07
ST6GAL1	0.929446	-0.279745	5.95562	5.98096e-08	7.98714e-07	7.71841	ST6GAL1	5	5.96818	5.54306e-08	7.32302e-07
TSPAN14	0.783595	0.314082	5.94864	6.16253e-08	8.17646e-07	7.68919	TSPAN14	12	5.96789	5.54994e-08	7.32425e-07
FOXP1	1.00787	-0.296801	5.96288	5.79789e-08	7.77637e-07	7.74878	FOXP1	2	5.96655	5.5819e-08	7.35856e-07
ATG9A	0.483937	0.0589062	5.95072	6.10796e-08	8.12155e-07	7.69788	ATG9A	15	5.96418	5.63914e-08	7.42607e-07
SEC62	0.307206	0.143064	5.90806	7.33055e-08	9.5012e-07	7.51964	SEC62	52	5.96326	5.66163e-08	7.44774e-07
ULK1	-0.373802	0.0704344	-5.96047	5.85799e-08	7.84844e-07	7.7387	ULK1	14	-5.96208	5.69036e-08	7.47755e-07
BBS4	-0.645133	-0.283923	-5.97816	5.43003e-08	7.37934e-07	7.81283	BBS4	3	-5.9617	5.69951e-08	7.48147e-07
RDX	0.579112	-0.170491	5.92027	6.95787e-08	9.05625e-07	7.57061	RDX	122	5.96146	5.70549e-08	7.48147e-07
RFTN1	0.790046	-0.0793853	5.92481	6.8242e-08	8.91994e-07	7.58956	RFTN1	81	5.95771	5.79821e-08	7.59497e-07
HLA-DOA	0.934667	0.0645498	5.96661	5.70585e-08	7.67799e-07	7.76442	HLA-DOA	1	5.95473	5.87276e-08	7.68446e-07
PLEKHF1	-0.791455	-0.122504	-5.96371	5.77716e-08	7.76546e-07	7.75228	PLEKHF1	2	-5.95326	5.91005e-08	7.72506e-07
RASA1	0.379887	-0.0806397	5.89978	7.59449e-08	9.79181e-07	7.4851	RASA1	69	5.95086	5.9712e-08	7.79332e-07
PHKA1	-1.09618	-0.414251	-5.92901	6.70265e-08	8.79839e-07	7.60711	PHKA1	10	-5.95072	5.97492e-08	7.79332e-07
OS9	0.344697	-0.111695	5.89986	7.59204e-08	9.79181e-07	7.48541	OS9	53	5.94948	6.00675e-08	7.82655e-07
BPNT1	0.282066	0.117847	5.87333	8.50191e-08	1.08708e-06	7.37487	BPNT1	76	5.9474	6.06062e-08	7.88841e-07
LAS1L	0.224964	0.0626907	5.84308	9.67097e-08	1.21389e-06	7.24908	LAS1L	80	5.94641	6.08655e-08	7.9138e-07
OGN	-1.05162	-0.381565	-5.93881	6.42738e-08	8.49131e-07	7.64808	OGN	2	-5.94449	6.13677e-08	7.97069e-07
KCTD1	-0.836857	-0.261312	-5.92219	6.90116e-08	9.00145e-07	7.5786	KCTD1	14	-5.94369	6.15789e-08	7.9897e-07
NLRC3	-0.576543	-0.0216092	-5.91502	7.11579e-08	9.24228e-07	7.54869	NLRC3	24	-5.93999	6.25664e-08	8.10929e-07
ALDH1A2	-1.22713	-0.644565	-5.92223	6.9e-08	9.00145e-07	7.57876	ALDH1A2	4	-5.93916	6.27902e-08	8.12974e-07
CCDC102A	-0.560025	-0.0233562	-5.93562	6.51578e-08	8.59887e-07	7.63473	CCDC102A	8	-5.93833	6.30137e-08	8.15013e-07
STN1	-0.348286	0.0153863	-5.96938	5.63852e-08	7.60198e-07	7.77602	STN1	8	-5.93408	6.41714e-08	8.29116e-07
HACD2	0.45345	0.102571	5.95534	5.98825e-08	7.98823e-07	7.71722	HACD2	6	5.9326	6.458e-08	8.33521e-07
BBS2	-0.675653	0.02656	-5.93936	6.41238e-08	8.48057e-07	7.65036	BBS2	3	-5.92725	6.60794e-08	8.51981e-07
MYO7B	-1.29671	0.122404	-5.96169	7.55659e-08	9.77361e-07	7.553	MYO7B	5	-5.98223	6.7588e-08	8.70522e-07
FRRS1	-0.732681	-0.255563	-5.92742	6.74839e-08	8.84901e-07	7.60047	FRRS1	3	-5.92119	6.78205e-08	8.72605e-07
GPCPD1	0.643781	-0.415191	5.89277	7.82535e-08	1.00684e-06	7.45585	GPCPD1	29	5.9201	6.81389e-08	8.752e-07
MAP2K2	-0.314587	0.167058	-5.89451	7.76731e-08	1.00042e-06	7.46312	MAP2K2	26	-5.92001	6.81642e-08	8.752e-07
ABHD17A	-0.423379	-0.00154204	-5.95962	5.87929e-08	7.86842e-07	7.73516	ABHD17A	5	-5.91944	6.83317e-08	8.75813e-07
CSNK1G3	0.556116	-0.0343134	5.94983	6.13116e-08	8.1436e-07	7.69417	CSNK1G3	3	5.91936	6.83541e-08	8.75813e-07
TNFAIP8L2	0.612178	0.0494508	5.93443	6.54895e-08	8.62418e-07	7.62977	TNFAIP8L2	3	5.9141	6.99118e-08	8.94636e-07
FANCD2	-0.452588	-0.178183	-5.86705	8.73262e-08	1.11542e-06	7.34873	FANCD2	92	-5.91391	6.99683e-08	8.94636e-07
CSNK2A2	-0.156479	0.0340294	-5.73008	1.56144e-07	1.86174e-06	6.78162	CSNK2A2	81	-5.91054	7.09857e-08	9.06704e-07
S100A1	1.56153	-0.799606	5.88757	8.00097e-08	1.02729e-06	7.43418	S100A1	6	5.90977	7.12214e-08	9.08773e-07
FYTTD1	0.411726	0.240361	5.88372	8.13333e-08	1.04211e-06	7.41815	FYTTD1	25	5.9084	7.16419e-08	9.13194e-07
SNX17	-0.43256	0.110741	-5.86613	8.76658e-08	1.1186e-06	7.34494	SNX17	46	-5.90429	7.29118e-08	9.2842e-07
ABCC3	0.692743	-0.0639318	5.92174	6.91439e-08	9.00917e-07	7.57673	ABCC3	2	5.90093	7.39709e-08	9.40552e-07
SUOX	0.753842	-0.502954	5.93218	6.61231e-08	8.69832e-07	7.62037	SUOX	1	5.90078	7.40171e-08	9.40552e-07
ZNF555	0.643526	0.14964	5.92602	6.78907e-08	8.89289e-07	7.5946	ZNF555	2	5.89771	7.49973e-08	9.52026e-07
NEK7	-0.50957	0.249024	-5.86179	8.93049e-08	1.13482e-06	7.32685	NEK7	33	-5.89172	7.69426e-08	9.75715e-07
PRDX6	0.354036	0.150393	5.81403	1.09419e-07	1.35411e-06	7.12857	PRDX6	329	5.8885	7.80119e-08	9.88257e-07
ZXDC	-0.329461	-0.0263216	-6.0746	3.58618e-08	5.13394e-07	8.21837	ZXDC	2	-5.88562	7.89795e-08	9.99489e-07
TXNDC5	0.40123	-0.100062	5.82725	1.03442e-07	1.28811e-06	7.18339	TXNDC5	140	5.88426	7.944e-08	1.00428e-06
APP	0.952441	-0.278242	5.85763	9.09003e-08	1.15271e-06	7.30957	APP	18	5.88164	8.03329e-08	1.01453e-06
NCAPH2	-0.333119	0.0644778	-5.8463	9.53942e-08	1.20351e-06	7.26246	NCAPH2	32	-5.88001	8.08947e-08	1.02058e-06
PGRMC1	-0.301099	0.00756034	-5.82065	1.06384e-07	1.31975e-06	7.15601	PGRMC1	55	-5.87728	8.18462e-08	1.03153e-06
GUK1	-0.398212	0.106674	-5.83601	9.96613e-08	1.2446e-06	7.21974	GUK1	47	-5.87644	8.21398e-08	1.03417e-06
SEPTIN6	-0.378104	0.0851753	-5.82056	1.06428e-07	1.31975e-06	7.15561	SEPTIN6	94	-5.87587	8.23391e-08	1.03562e-06
REEP5	0.613532	-0.0924081	5.84095	9.75876e-08	1.22367e-06	7.24026	REEP5	28	5.86771	8.52632e-08	1.07131e-06
IRF2BP2	0.383169	-0.0558244	5.81267	1.10053e-07	1.3587e-06	7.12292	IRF2BP2	80	5.86449	8.64453e-08	1.08506e-06
RTKN	0.562215	0.152161	5.86017	8.99233e-08	1.1415e-06	7.32012	RTKN	7	5.86004	8.81037e-08	1.10475e-06
EXOC3	-0.187529	0.0429174	-5.73371	1.53768e-07	1.83657e-06	6.79657	EXOC3	73	-5.85854	8.86692e-08	1.11071e-06
RHOC	-0.713	-0.174414	-5.8532	9.26294e-08	1.17103e-06	7.29117	RHOC	5	-5.85676	8.93438e-08	1.11802e-06
GLB1L2	-1.47302	0.0858334	-5.98988	9.57932e-08	1.20731e-06	7.39938	GLB1L2	1	-5.99857	8.96019e-08	1.12011e-06
BCL6	0.978585	-0.257206	5.83783	9.88909e-08	1.23624e-06	7.22731	BCL6	7	5.85527	8.99166e-08	1.12291e-06
DMTN	-1.44843	-0.436893	-5.97852	9.60355e-08	1.20913e-06	7.38954	DMTN	1	-5.98657	9.01284e-08	1.12442e-06
BOLA2B	-0.874451	-0.168795	-6.16748	7.56676e-08	9.77651e-07	7.72635	BOLA2B	1	-6.10454	9.20977e-08	1.14782e-06
UBE2E2	1.12165	-0.374083	5.83448	1.00312e-07	1.25147e-06	7.21338	UBE2E2	3	5.84715	9.30875e-08	1.15899e-06
ACSL1	0.923793	-0.526977	5.81253	1.1012e-07	1.3587e-06	7.12233	ACSL1	50	5.84133	9.54258e-08	1.1869e-06
ADAM15	0.657888	-0.158034	5.84381	9.6407e-08	1.21203e-06	7.25215	ADAM15	4	5.83834	9.66531e-08	1.20095e-06
CKS2	-0.386285	-0.212858	-5.85737	9.09994e-08	1.15278e-06	7.3085	CKS2	8	-5.83578	9.77102e-08	1.21287e-06
STRN4	-0.18967	0.0367754	-5.75017	1.43432e-07	1.7265e-06	6.86445	STRN4	46	-5.83527	9.79231e-08	1.21429e-06
HLA-DPA1	0.869526	-0.0246201	5.81369	1.09577e-07	1.35471e-06	7.12716	HLA-DPA1	10	5.83253	9.90767e-08	1.22736e-06
TAL1	-1.15729	-0.31771	-5.82722	1.03458e-07	1.28811e-06	7.18324	TAL1	1	-5.82974	1.00262e-07	1.24079e-06
WNK1	-0.337702	-0.0600515	-5.7666	1.33799e-07	1.61687e-06	6.93227	WNK1	99	-5.82914	1.00517e-07	1.24271e-06
SIAE	0.922744	0.0188256	5.81789	1.0764e-07	1.33344e-06	7.14456	SIAE	4	5.82796	1.01025e-07	1.24773e-06
GRSF1	-0.398198	-0.178385	-5.7724	1.30554e-07	1.58231e-06	6.95622	GRSF1	103	-5.82515	1.0224e-07	1.2605e-06
DOCK11	0.637079	0.121939	5.7867	1.22874e-07	1.49741e-06	7.01538	DOCK11	163	5.8251	1.02263e-07	1.2605e-06
USP30	-0.452977	0.180116	-5.86326	8.8745e-08	1.12992e-06	7.33299	USP30	4	-5.82281	1.03267e-07	1.2716e-06
POLR1E	0.332397	0.050783	5.77006	1.31852e-07	1.5955e-06	6.94657	POLR1E	57	5.82124	1.0396e-07	1.27885e-06
STAT5B	-0.57804	0.0682196	-5.79163	1.20332e-07	1.4729e-06	7.03578	STAT5B	35	-5.821	1.04064e-07	1.27885e-06
ZBTB21	-0.426957	-0.0554823	-5.78622	1.23127e-07	1.49819e-06	7.01338	ZBTB21	38	-5.8202	1.04421e-07	1.28196e-06
NAA35	-0.194114	0.0280381	-5.7151	1.66337e-07	1.96386e-06	6.71995	NAA35	60	-5.81795	1.05426e-07	1.29301e-06
HDAC9	0.960404	-0.55181	5.79488	1.18686e-07	1.45419e-06	7.04923	HDAC9	9	5.81416	1.07143e-07	1.31277e-06
ANKHD1	-0.365168	-0.124368	-5.84707	9.50796e-08	1.20077e-06	7.26568	ANKHD1	7	-5.81185	1.08201e-07	1.32441e-06
RNF181	-0.322365	-0.101829	-5.80613	1.13153e-07	1.39473e-06	7.09581	RNF181	17	-5.81123	1.08489e-07	1.32662e-06
FIGNL1	-0.339667	-0.17582	-5.78657	1.22942e-07	1.49741e-06	7.01485	FIGNL1	24	-5.80855	1.09731e-07	1.34049e-06
ACVR1B	-0.519035	0.0944293	-5.8393	9.82782e-08	1.23107e-06	7.23338	ACVR1B	3	-5.80357	1.12084e-07	1.36787e-06
DIP2C	0.951864	-0.27209	5.80021	1.16034e-07	1.42738e-06	7.07128	DIP2C	2	5.80244	1.12624e-07	1.37309e-06
GNL3	0.298896	-0.013443	5.72935	1.56624e-07	1.86527e-06	6.77862	GNL3	96	5.8004	1.13606e-07	1.3837e-06
STXBP1	-0.710987	0.0852992	-5.76997	1.31901e-07	1.5955e-06	6.94621	STXBP1	42	-5.79933	1.14123e-07	1.38863e-06
POMP	-0.541161	-0.13671	-5.77319	1.30116e-07	1.57855e-06	6.95951	POMP	25	-5.79809	1.14728e-07	1.39462e-06
XRCC3	-0.420048	-0.136307	-5.78675	1.22848e-07	1.49741e-06	7.01559	XRCC3	14	-5.79444	1.16523e-07	1.41504e-06
LRIG1	0.827519	-0.136886	5.77349	1.29948e-07	1.57807e-06	6.96077	LRIG1	7	5.78761	1.19953e-07	1.45526e-06
HYLS1	0.449549	-0.00235439	5.82238	1.05606e-07	1.3122e-06	7.16318	HYLS1	4	5.78213	1.22781e-07	1.4881e-06
PLIN3	0.434486	0.162967	5.72583	1.58975e-07	1.8878e-06	6.76409	PLIN3	197	5.77906	1.24395e-07	1.50618e-06
AKR1A1	0.427498	0.107412	5.72394	1.60244e-07	1.8992e-06	6.75634	AKR1A1	203	5.77827	1.24813e-07	1.50975e-06
JTB	-0.571487	0.198502	-5.79905	1.16602e-07	1.43294e-06	7.06651	JTB	3	-5.77486	1.26629e-07	1.53023e-06
TMED9	0.246516	0.0276685	5.72417	1.60088e-07	1.89918e-06	6.75729	TMED9	37	5.77194	1.28212e-07	1.54784e-06
DNMT3B	-0.844632	-0.196968	-5.74829	1.44575e-07	1.73687e-06	6.85671	DNMT3B	18	-5.77139	1.2851e-07	1.54992e-06
HLA-F	1.01465	-0.268077	5.74511	1.46534e-07	1.7587e-06	6.84358	HLA-F	28	5.77098	1.28734e-07	1.55096e-06
ENTPD6	-0.500398	-0.220169	-5.79787	1.17191e-07	1.43732e-06	7.06159	ENTPD6	4	-5.77078	1.28848e-07	1.55096e-06
ARFGAP2	0.234837	-0.0705375	5.67298	1.98642e-07	2.2833e-06	6.54688	ARFGAP2	76	5.76079	1.34427e-07	1.61653e-06
R3HCC1L	0.234587	0.0277421	5.72148	1.61918e-07	1.91719e-06	6.74621	R3HCC1L	30	5.75673	1.36765e-07	1.64173e-06
ZYG11B	0.290133	0.0546903	5.73003	1.56177e-07	1.86174e-06	6.78141	ZYG11B	27	5.75669	1.36788e-07	1.64173e-06
SMURF2	-0.434181	-0.0817426	-5.77784	1.2758e-07	1.55084e-06	6.97871	SMURF2	6	-5.75452	1.3805e-07	1.65526e-06
PTPMT1	0.42793	0.0349019	5.73504	1.52905e-07	1.82804e-06	6.80206	PTPMT1	19	5.75225	1.39385e-07	1.66964e-06
EFCAB14	-0.339482	-0.0690422	-5.75421	1.41001e-07	1.69891e-06	6.88112	EFCAB14	13	-5.74904	1.41299e-07	1.68994e-06
NUDCD2	-0.274767	0.108221	-5.70454	1.73914e-07	2.03964e-06	6.67651	NUDCD2	38	-5.74894	1.41354e-07	1.68994e-06
CHD8	-0.176665	0.000312063	-5.57974	2.93703e-07	3.26731e-06	6.1658	CHD8	132	-5.74626	1.42972e-07	1.70763e-06
FAM133B	-0.518269	0.191583	-5.79869	1.16781e-07	1.43371e-06	7.06501	FAM133B	2	-5.74599	1.43133e-07	1.70789e-06
KHK	0.470731	-0.0174669	5.75478	1.40662e-07	1.69648e-06	6.88347	KHK	7	5.74505	1.43706e-07	1.71308e-06
CACTIN	-0.202791	-0.0170282	-5.65314	2.1593e-07	2.46212e-06	6.46554	CACTIN	56	-5.74207	1.45534e-07	1.73319e-06
CORO2B	1.09073	-0.501845	5.71905	1.63591e-07	1.93514e-06	6.73618	CORO2B	10	5.74026	1.46653e-07	1.74483e-06
ZNF688	-0.354812	0.0505355	-5.80023	1.1602e-07	1.42738e-06	7.07139	ZNF688	5	-5.73897	1.4746e-07	1.75274e-06
MOCS2	-0.678959	-0.306093	-5.71423	1.66949e-07	1.9692e-06	6.71636	MOCS2	18	-5.73586	1.49416e-07	1.77428e-06
FOXP4	-0.426875	-0.173161	-5.71855	1.63936e-07	1.93737e-06	6.73413	FOXP4	17	-5.7327	1.51429e-07	1.79645e-06
KDM1B	0.295906	0.0195677	5.70024	1.77097e-07	2.07303e-06	6.65882	KDM1B	29	5.73012	1.53088e-07	1.81439e-06
DMTF1	-0.31275	-0.0339218	-5.83902	9.83945e-08	1.23128e-06	7.23222	DMTF1	4	-5.72952	1.53477e-07	1.81726e-06
HAAO	1.04225	-0.212996	5.70844	1.71078e-07	2.01404e-06	6.69254	HAAO	7	5.72681	1.55252e-07	1.83651e-06
CD8A	-1.34293	-0.307343	-5.84259	1.71932e-07	2.02024e-06	6.83401	CD8A	3	-5.86028	1.55558e-07	1.83664e-06
TSNARE1	-0.853233	-0.302599	-5.74184	1.48572e-07	1.77969e-06	6.8301	TSNARE1	1	-5.72634	1.55562e-07	1.83664e-06
ARL6IP4	-0.262566	-0.0302259	-5.70624	1.7267e-07	2.02699e-06	6.6835	ARL6IP4	24	-5.72555	1.56085e-07	1.84105e-06
TMEM30A	0.271126	0.0790568	5.67639	1.95817e-07	2.25785e-06	6.56085	TMEM30A	38	5.72089	1.59191e-07	1.8759e-06
SFT2D2	0.353503	-0.0474615	5.7571	1.39286e-07	1.68153e-06	6.89306	SFT2D2	7	5.72038	1.59537e-07	1.87818e-06
SMARCC1	-0.297727	0.106879	-5.63723	2.30851e-07	2.61532e-06	6.40041	SMARCC1	210	-5.71996	1.59815e-07	1.87908e-06
TCIRG1	0.668999	-0.0835089	5.69718	1.79397e-07	2.09597e-06	6.64624	TCIRG1	20	5.71978	1.59941e-07	1.87908e-06
TIMM8A	0.342772	0.138993	5.7278	1.57655e-07	1.87435e-06	6.77222	TIMM8A	12	5.71959	1.60071e-07	1.87908e-06
HECW1	1.06757	-0.427933	5.71136	1.68988e-07	1.99134e-06	6.70453	HECW1	2	5.71886	1.60562e-07	1.88305e-06
NQO2	-0.784733	-0.183757	-5.69636	1.80018e-07	2.10015e-06	6.64287	NQO2	13	-5.71614	1.62425e-07	1.90309e-06
CD53	0.551722	0.179416	5.74203	1.48456e-07	1.77969e-06	6.83087	CD53	3	5.71554	1.62837e-07	1.9061e-06
DGKH	0.557091	-0.26797	5.68484	1.88973e-07	2.18917e-06	6.59554	DGKH	37	5.71444	1.63593e-07	1.91314e-06
ADPGK	0.310494	0.110925	5.68336	1.90151e-07	2.20075e-06	6.58948	ADPGK	29	5.71272	1.64788e-07	1.92528e-06
RABEPK	0.327826	-0.000273417	5.69881	1.78171e-07	2.08362e-06	6.65292	RABEPK	19	5.71025	1.66522e-07	1.94248e-06
DCLRE1A	-0.352176	-0.121127	-5.85507	9.18981e-08	1.16297e-06	7.29891	DCLRE1A	2	-5.71017	1.66575e-07	1.94248e-06
RGS12	0.871616	-0.0168344	5.68234	1.90972e-07	2.20819e-06	6.58527	RGS12	18	5.70538	1.69986e-07	1.98039e-06
ERCC4	-0.254781	0.0992643	-5.63155	2.36416e-07	2.67345e-06	6.3772	ERCC4	69	-5.70486	1.70358e-07	1.98285e-06
RNASET2	0.765508	0.260802	5.68947	1.85321e-07	2.15904e-06	6.61456	RNASET2	8	5.70361	1.71259e-07	1.99145e-06
MAP1S	0.316932	0.168667	5.64509	2.23354e-07	2.53739e-06	6.43259	MAP1S	68	5.70114	1.73062e-07	2.01052e-06
N4BP3	0.778086	-0.382894	5.68709	1.87191e-07	2.17058e-06	6.60477	N4BP3	7	5.69988	1.73985e-07	2.01934e-06
IL9R	-1.18791	-0.161204	-5.91658	1.8552e-07	2.15932e-06	6.83517	IL9R	2	-5.92125	1.75547e-07	2.03555e-06
CLIC4	0.506753	0.211761	5.6526	2.16415e-07	2.46537e-06	6.46335	CLIC4	131	5.69509	1.77539e-07	2.05672e-06
SPATA20	0.978298	-0.172341	5.67744	1.94947e-07	2.24992e-06	6.56519	SPATA20	7	5.69485	1.77723e-07	2.05692e-06
RSPRY1	0.23204	0.00335825	5.65555	2.13753e-07	2.44182e-06	6.47541	RSPRY1	30	5.69037	1.81114e-07	2.09419e-06
C3orf33	-0.683092	-0.0419872	-5.79404	1.51134e-07	1.80862e-06	6.87612	C3orf33	1	-5.74252	1.82495e-07	2.10818e-06
MRNIP	0.441935	0.177866	5.69626	1.80095e-07	2.10015e-06	6.64245	MRNIP	8	5.68803	1.82917e-07	2.11108e-06
GLUL	-0.809796	-0.291054	-5.66061	2.09257e-07	2.39267e-06	6.49614	GLUL	28	-5.68622	1.84314e-07	2.12522e-06
SKI	-0.459492	0.0554108	-5.6803	1.92615e-07	2.22509e-06	6.57692	SKI	11	-5.68482	1.85413e-07	2.13589e-06
WASHC2C	0.277743	0.112073	5.66625	2.04349e-07	2.34308e-06	6.51927	WASHC2C	23	5.68371	1.86282e-07	2.1439e-06
GFI1	-0.577239	0.149388	-5.6886	1.86001e-07	2.16083e-06	6.61099	GFI1	5	-5.68247	1.87257e-07	2.15182e-06
STX3	0.807233	-0.145198	5.66175	2.08254e-07	2.38341e-06	6.50082	STX3	14	5.68239	1.8732e-07	2.15182e-06
EIF4G3	0.284493	0.0898849	5.59909	2.70867e-07	3.03795e-06	6.24465	EIF4G3	163	5.68191	1.87698e-07	2.15416e-06
CLCN3	-0.351585	0.0618139	-5.70807	1.71347e-07	2.01529e-06	6.691	CLCN3	8	-5.68032	1.88967e-07	2.16671e-06
MIDN	-0.56228	-0.0268993	-5.92155	1.20602e-07	1.47474e-06	7.16701	MIDN	1	-5.79861	1.91243e-07	2.19077e-06
MAML3	0.831625	0.111435	5.6733	1.98373e-07	2.28305e-06	6.54821	MAML3	3	5.67632	1.9218e-07	2.19879e-06
CDT1	-0.419275	-0.0205595	-5.66593	2.04622e-07	2.34403e-06	6.51797	CDT1	15	-5.67617	1.92301e-07	2.19879e-06
DPF3	-1.01767	-0.181454	-5.65502	2.14223e-07	2.44492e-06	6.47327	DPF3	7	-5.67301	1.94881e-07	2.22623e-06
PRKAR1A	-0.356084	-0.0521201	-5.61275	2.5581e-07	2.88219e-06	6.30037	PRKAR1A	126	-5.67168	1.95977e-07	2.23667e-06
PLD4	0.85888	-0.158238	5.67283	1.98765e-07	2.2833e-06	6.54628	PLD4	2	5.671	1.96543e-07	2.24106e-06
PIP4K2C	-0.940079	-0.490875	-5.64143	2.26811e-07	2.57191e-06	6.41762	PIP4K2C	22	-5.6657	2.00983e-07	2.28957e-06
VPREB3	1.3741	-0.355233	5.65122	2.17675e-07	2.47675e-06	6.45769	VPREB3	1	5.66121	2.04822e-07	2.32921e-06
USP46	0.486617	-0.0735268	5.6887	1.85925e-07	2.16083e-06	6.61139	USP46	4	5.66119	2.04841e-07	2.32921e-06
KATNA1	-0.318968	-0.00370168	-5.61623	2.52104e-07	2.84304e-06	6.31459	KATNA1	42	-5.6579	2.07707e-07	2.35963e-06
ZSWIM6	0.673326	0.0350877	5.97033	1.43693e-07	1.72797e-06	7.07615	ZSWIM6	1	5.86329	2.08595e-07	2.36753e-06
HVCN1	0.913862	-0.215472	5.63639	2.31665e-07	2.62214e-06	6.39698	HVCN1	10	5.65567	2.09663e-07	2.37746e-06
TRUB1	0.279146	0.114662	5.60812	2.60815e-07	2.93321e-06	6.28149	TRUB1	42	5.65476	2.10465e-07	2.38437e-06
AKR1B1	0.371654	0.146485	5.59521	2.75303e-07	3.08454e-06	6.22882	AKR1B1	144	5.65249	2.12492e-07	2.40512e-06
ARL6	-0.629612	-0.081806	-5.62922	2.38742e-07	2.69481e-06	6.36766	ARL6	7	-5.63573	2.28028e-07	2.5786e-06
HMG20A	-0.220909	0.0405364	-5.58414	2.88347e-07	3.21353e-06	6.18373	HMG20A	36	-5.63286	2.30798e-07	2.60753e-06
NXPE3	-0.629581	-0.21032	-5.74241	1.8686e-07	2.16877e-06	6.66909	NXPE3	1	-5.67923	2.36682e-07	2.67156e-06
KIAA0753	0.266037	-0.0702434	5.64291	2.25411e-07	2.55839e-06	6.42366	KIAA0753	14	5.62643	2.37123e-07	2.67409e-06
NCOA2	0.391924	-0.115766	5.58476	2.87608e-07	3.2082e-06	6.18622	NCOA2	54	5.62527	2.3828e-07	2.68468e-06
ITCH	-0.22738	-0.0777354	-5.54849	3.34638e-07	3.67341e-06	6.03872	ITCH	60	-5.62451	2.39045e-07	2.69084e-06
PET100	-0.447286	0.0781473	-5.67477	1.9715e-07	2.27109e-06	6.55424	PET100	3	-5.62406	2.39495e-07	2.69344e-06
S100A11	-1.24948	-0.471021	-5.59502	2.75521e-07	3.08454e-06	6.22805	S100A11	55	-5.62155	2.42035e-07	2.71953e-06
RORC	-1.47372	0.374136	-5.93567	2.56135e-07	2.88322e-06	6.61119	RORC	1	-5.9368	2.43721e-07	2.73598e-06
ZRANB1	-0.423709	-0.0209847	-5.70328	1.74844e-07	2.0486e-06	6.6713	ZRANB1	2	-5.61788	2.45802e-07	2.75683e-06
GTDC1	0.501334	0.146249	5.6689	2.02085e-07	2.31927e-06	6.53013	GTDC1	2	5.61577	2.47988e-07	2.77882e-06
MTMR14	0.349124	0.13493	5.58393	2.88608e-07	3.21353e-06	6.18284	MTMR14	32	5.61489	2.48901e-07	2.78512e-06
UBA5	-0.218228	0.0824453	-5.5264	3.66906e-07	3.96014e-06	5.94908	UBA5	71	-5.6148	2.49002e-07	2.78512e-06
KLHL7	-0.521891	-0.0200387	-5.58796	2.83775e-07	3.16864e-06	6.19929	KLHL7	22	-5.61006	2.54001e-07	2.83845e-06
FAM160B2	-0.404104	-0.0428946	-5.607	2.62047e-07	2.9417e-06	6.2769	FAM160B2	11	-5.60615	2.58214e-07	2.88292e-06
NRDE2	-0.249128	0.0639825	-5.55556	3.24917e-07	3.58864e-06	6.06743	NRDE2	41	-5.60557	2.58841e-07	2.88731e-06
ARID1B	0.308368	0.089428	5.53599	3.52549e-07	3.83541e-06	5.98794	ARID1B	114	5.60244	2.62268e-07	2.92289e-06
AC207582.2	0.223716	0.0267612	5.78687	1.22788e-07	1.49741e-06	7.01607	AC207582.2	5	5.60204	2.62704e-07	2.9251e-06
TIMM21	0.266443	0.0319956	5.60772	2.61252e-07	2.93545e-06	6.27986	TIMM21	15	5.59685	2.68494e-07	2.98687e-06
DEF6	-0.449789	0.0486411	-5.54763	3.35841e-07	3.67962e-06	6.03522	DEF6	150	-5.59412	2.71584e-07	3.01853e-06
THUMPD2	0.39086	0.0210932	5.57375	3.01155e-07	3.34116e-06	6.14139	THUMPD2	22	5.59361	2.72164e-07	3.02224e-06
DCUN1D1	-0.272662	0.134018	-5.55833	3.2118e-07	3.55056e-06	6.07869	DCUN1D1	32	-5.59293	2.72941e-07	3.02814e-06
SLC44A1	0.724098	-0.37807	5.56781	3.0872e-07	3.42202e-06	6.11723	SLC44A1	17	5.58899	2.77482e-07	3.07576e-06
PVRIG	-0.504301	-0.222011	-5.85429	1.57691e-07	1.87435e-06	6.90517	PVRIG	1	-5.7012	2.81667e-07	3.11934e-06
NAPA	-0.247067	0.0271081	-5.48796	4.305e-07	4.55872e-06	5.79348	NAPA	144	-5.58216	2.85548e-07	3.15903e-06
DCUN1D4	-0.368398	-0.0172493	-5.63103	2.36929e-07	2.6768e-06	6.37509	DCUN1D4	5	-5.58198	2.85763e-07	3.15903e-06
YOD1	-1.01836	-0.221839	-5.56262	3.15483e-07	3.49384e-06	6.09612	YOD1	5	-5.57791	2.90674e-07	3.20898e-06
CD3EAP	0.341899	0.0436085	5.54889	3.34091e-07	3.67341e-06	6.04031	CD3EAP	30	5.57781	2.90803e-07	3.20898e-06
NCOA1	-0.420168	0.111958	-5.55318	3.28161e-07	3.61507e-06	6.05775	NCOA1	25	-5.57668	2.92179e-07	3.22128e-06
PRDM16	-1.10498	-0.29453	-5.6282	2.98087e-07	3.31309e-06	6.21372	PRDM16	1	-5.62754	2.92452e-07	3.22141e-06
CDK5	-0.282375	0.110905	-5.52739	3.65403e-07	3.94917e-06	5.95308	CDK5	43	-5.57316	2.96516e-07	3.26326e-06
PRKACB	-0.665311	-0.193711	-5.54846	3.34678e-07	3.67341e-06	6.0386	PRKACB	23	-5.57194	2.98045e-07	3.27717e-06
ADAM22	-0.450853	-0.00825983	-5.57531	2.99194e-07	3.3224e-06	6.14776	ADAM22	8	-5.56985	3.0066e-07	3.30298e-06
COQ7	0.318866	0.161402	5.54769	3.35756e-07	3.67962e-06	6.03547	COQ7	21	5.56309	3.09293e-07	3.39479e-06
KIF15	-0.459583	-0.133062	-5.51563	3.8374e-07	4.11302e-06	5.90541	KIF15	216	-5.56281	3.09649e-07	3.39567e-06
COMMD4	-0.292565	0.0410732	-5.53538	3.53446e-07	3.84178e-06	5.98547	COMMD4	27	-5.56104	3.11958e-07	3.41795e-06
IQGAP3	0.599911	-0.165449	5.52741	3.65368e-07	3.94917e-06	5.95317	IQGAP3	61	5.55938	3.14126e-07	3.43865e-06
PMM1	-0.533929	-0.103719	-5.54075	3.45623e-07	3.77004e-06	6.00726	PMM1	16	-5.55786	3.16132e-07	3.45754e-06
ADAM17	0.307099	-0.0527335	5.52728	3.65569e-07	3.94917e-06	5.95264	ADAM17	29	5.55571	3.18994e-07	3.48356e-06
ALDH6A1	0.46702	0.22822	5.51573	3.83579e-07	4.11302e-06	5.90582	ALDH6A1	84	5.55565	3.19077e-07	3.48356e-06
TACC1	-0.404922	-0.139325	-5.51028	3.92365e-07	4.19817e-06	5.88377	TACC1	66	-5.55196	3.24027e-07	3.53448e-06
RFC4	-0.221461	0.0246408	-5.4446	5.15275e-07	5.32378e-06	5.61857	RFC4	129	-5.55068	3.25777e-07	3.55042e-06
FRMD6	-0.942419	-0.0856181	-5.92861	2.79728e-07	3.12879e-06	6.52817	FRMD6	1	-5.87101	3.28392e-07	3.57576e-06
PTP4A3	0.924898	-0.277135	5.5455	3.38845e-07	3.70648e-06	6.02655	PTP4A3	2	5.54835	3.28968e-07	3.57887e-06
IRF2BPL	-0.610325	-0.166757	-5.5199	3.7697e-07	4.06166e-06	5.92274	IRF2BPL	32	-5.54644	3.31595e-07	3.60427e-06
GBA	0.482608	0.0903623	5.51909	3.78244e-07	4.07182e-06	5.91945	GBA	28	5.54467	3.34066e-07	3.62793e-06
MYO5C	1.19282	-0.265512	5.51816	3.79718e-07	4.08412e-06	5.91566	MYO5C	19	5.54182	3.38071e-07	3.66818e-06
EPSTI1	-1.22034	-0.101678	-5.52888	3.63141e-07	3.94021e-06	5.95912	EPSTI1	2	-5.54105	3.39149e-07	3.67665e-06
PPP2R5B	-0.589393	0.288927	-5.53764	3.50122e-07	3.81381e-06	5.99467	PPP2R5B	5	-5.53445	3.48637e-07	3.77619e-06
DNMT3A	-0.512024	0.0652009	-5.49666	4.1523e-07	4.4198e-06	5.82863	DNMT3A	88	-5.53413	3.49103e-07	3.77792e-06
MAN1C1	0.831369	-0.397874	5.61217	3.27752e-07	3.61507e-06	6.12753	MAN1C1	1	5.58964	3.51342e-07	3.7988e-06
CCDC69	0.694905	-0.145027	5.51335	3.87396e-07	4.14861e-06	5.89617	CCDC69	13	5.53143	3.53062e-07	3.81406e-06
WDR34	-0.397229	-0.0918281	-5.52765	3.65011e-07	3.94917e-06	5.95412	WDR34	12	-5.52965	3.55696e-07	3.83914e-06
LRP10	0.457976	0.056575	5.5492	3.33659e-07	3.67203e-06	6.04157	LRP10	5	5.52768	3.58628e-07	3.86472e-06
UHRF1	0.501872	-0.178477	5.4825	4.40386e-07	4.65141e-06	5.77139	UHRF1	402	5.52764	3.58692e-07	3.86472e-06
FBXO41	0.307585	0.0323619	5.53755	3.50255e-07	3.81381e-06	5.9943	FBXO41	12	5.52442	3.63547e-07	3.91361e-06
PPIF	0.394768	-0.00515065	5.4844	4.36916e-07	4.61872e-06	5.77909	PPIF	55	5.52373	3.64591e-07	3.92142e-06
CENPX	-0.33061	-0.0736761	-5.58794	2.83805e-07	3.16864e-06	6.19919	CENPX	5	-5.52326	3.65311e-07	3.92574e-06
STK17A	-0.739115	-0.283155	-5.50753	3.96883e-07	4.24282e-06	5.87262	STK17A	7	-5.51944	3.71176e-07	3.98529e-06
CD200	1.68042	0.104948	5.50042	4.08794e-07	4.35882e-06	5.84384	CD200	2	5.51846	3.727e-07	3.99817e-06
RNF168	-0.653879	0.0664322	-5.48938	4.27982e-07	4.53985e-06	5.79919	RNF168	36	-5.51643	3.75863e-07	4.0286e-06
PTPRC	-0.969747	-0.283908	-5.48657	4.33007e-07	4.58132e-06	5.78783	PTPRC	208	-5.51597	3.76592e-07	4.0329e-06
HPSE	1.31427	0.0693553	5.49916	4.10946e-07	4.37797e-06	5.83873	HPSE	3	5.51553	3.77281e-07	4.03678e-06
UBE2J1	0.477087	-0.0497511	5.48879	4.29034e-07	4.54709e-06	5.79681	UBE2J1	29	5.5148	3.7843e-07	4.04556e-06
DAXX	-0.225723	0.107287	-5.46253	4.78407e-07	5.00156e-06	5.6908	DAXX	39	-5.51318	3.80998e-07	4.06948e-06
NEDD1	-0.204069	0.0805029	-5.42298	5.63475e-07	5.76381e-06	5.53159	NEDD1	62	-5.50865	3.88263e-07	4.14349e-06
TAF10	-0.198759	0.0621654	-5.55316	3.2819e-07	3.61507e-06	6.05767	TAF10	14	-5.50738	3.90322e-07	4.16185e-06
EPS15	0.314584	0.0616854	5.43864	5.28158e-07	5.43698e-06	5.59455	EPS15	158	5.5057	3.93071e-07	4.18665e-06
XRN2	-0.131813	0.00895987	-5.22064	1.29131e-06	1.20217e-05	4.7258	XRN2	277	-5.50554	3.93327e-07	4.18665e-06
STON2	-0.741719	-0.0124729	-5.65815	3.42974e-07	3.74551e-06	6.14712	STON2	1	-5.6099	4.04184e-07	4.29311e-06
FBLN2	-0.763229	-0.104534	-5.51992	3.76939e-07	4.06166e-06	5.92281	FBLN2	1	-5.49896	4.04254e-07	4.29311e-06
ING2	-0.291202	-0.0186557	-5.49599	4.16387e-07	4.42447e-06	5.82593	ING2	17	-5.49889	4.04372e-07	4.29311e-06
RAD18	-0.429114	-0.200579	-5.46131	4.80835e-07	5.01419e-06	5.68588	RAD18	51	-5.49702	4.07541e-07	4.32302e-06
GCLM	-0.398573	-0.0026796	-5.46436	4.74794e-07	4.97223e-06	5.69818	GCLM	32	-5.49309	4.14268e-07	4.39059e-06
NCDN	-0.323046	-0.0481811	-5.45494	4.93693e-07	5.13524e-06	5.6602	NCDN	39	-5.492	4.16141e-07	4.40666e-06
FARP1	0.992279	-0.307837	5.47753	4.49561e-07	4.72403e-06	5.75132	FARP1	3	5.48784	4.23414e-07	4.47983e-06
MSL2	-0.273997	0.0500273	-5.48119	4.42785e-07	4.66476e-06	5.7661	MSL2	18	-5.48476	4.28874e-07	4.53371e-06
PIK3CD	0.56931	0.0705815	5.44881	5.06375e-07	5.24502e-06	5.63552	PIK3CD	102	5.48414	4.29991e-07	4.54161e-06
KATNB1	-0.273808	0.0435311	-5.42838	5.51034e-07	5.65062e-06	5.5533	KATNB1	57	-5.48388	4.30462e-07	4.54271e-06
PEX5L	-1.18066	-0.894421	-5.47691	4.50718e-07	4.73215e-06	5.74882	PEX5L	1	-5.4826	4.32756e-07	4.563e-06
GIMAP6	-1.22376	-0.636478	-5.46088	4.81693e-07	5.01889e-06	5.68414	GIMAP6	9	-5.48185	4.34109e-07	4.57336e-06
ODF2L	-0.614881	-0.12164	-5.50491	4.01228e-07	4.28185e-06	5.86203	ODF2L	2	-5.48137	4.3498e-07	4.57862e-06
DDX28	0.33636	-0.0943509	5.46193	4.79599e-07	5.00554e-06	5.68838	DDX28	20	5.47649	4.43886e-07	4.66251e-06
PPP1R21	0.358193	0.0321596	5.42684	5.54563e-07	5.68208e-06	5.54709	PPP1R21	87	5.47643	4.44005e-07	4.66251e-06
TSPAN5	-1.18521	-0.392218	-5.68269	4.48565e-07	4.71759e-06	5.97366	TSPAN5	1	-5.6765	4.44085e-07	4.66251e-06
PLEKHA5	-0.826684	-0.0864383	-5.45171	5.00329e-07	5.19988e-06	5.64721	PLEKHA5	25	-5.47573	4.45306e-07	4.67135e-06
PRAME	-1.45732	0.514124	-5.66508	4.79229e-07	5.00554e-06	5.90919	PRAME	1	-5.67329	4.4949e-07	4.71124e-06
HEXIM2	0.370218	-0.0671239	5.51734	3.81019e-07	4.09454e-06	5.91233	HEXIM2	5	5.4728	4.50758e-07	4.72051e-06
ITGAL	-1.08915	-0.408497	-5.4417	5.21511e-07	5.3792e-06	5.60687	ITGAL	66	-5.46824	4.59378e-07	4.80266e-06
DNA2	-0.432055	-0.064435	-5.43413	5.38084e-07	5.53163e-06	5.57644	DNA2	47	-5.46824	4.59382e-07	4.80266e-06
SH3PXD2A	0.770266	-0.0255077	5.44814	5.07793e-07	5.25529e-06	5.6328	SH3PXD2A	14	5.46793	4.59977e-07	4.80481e-06
PCDHGC3	0.689829	0.0117824	5.55587	3.99985e-07	4.27228e-06	5.92724	PCDHGC3	1	5.51389	4.64532e-07	4.84829e-06
UBR2	-0.282074	0.0450099	-5.39699	6.27288e-07	6.33247e-06	5.42725	UBR2	101	-5.46486	4.65874e-07	4.85817e-06
SLC35E1	-0.38236	0.0399625	-5.51709	3.81419e-07	4.09527e-06	5.91131	SLC35E1	4	-5.46413	4.67298e-07	4.86538e-06
NAPEPLD	-0.664475	-0.127323	-5.45755	4.88372e-07	5.08419e-06	5.67074	NAPEPLD	6	-5.4641	4.67354e-07	4.86538e-06
ERG	0.927085	-0.141261	5.43851	5.28436e-07	5.43698e-06	5.59404	ERG	34	5.4638	4.67937e-07	4.86733e-06
RTN4IP1	0.349482	0.00529402	5.45056	5.02723e-07	5.22036e-06	5.64257	RTN4IP1	18	5.46223	4.70993e-07	4.89183e-06
DNAL1	-0.329681	0.0806243	-5.47871	4.47363e-07	4.70896e-06	5.75609	DNAL1	10	-5.46218	4.71086e-07	4.89183e-06
PHF20	-0.278703	-0.0133777	-5.42988	5.47626e-07	5.62035e-06	5.55934	PHF20	30	-5.45999	4.75405e-07	4.93252e-06
TAF9	-0.249976	-0.0409063	-5.54253	3.4307e-07	3.74551e-06	6.01448	TAF9	7	-5.45739	4.80556e-07	4.98178e-06
COX11	-0.318349	0.105581	-5.46361	4.76263e-07	4.98338e-06	5.69517	COX11	12	-5.45403	4.87313e-07	5.04758e-06
CCDC57	-0.54446	-0.0992581	-5.68543	3.19536e-07	3.53554e-06	6.22335	CCDC57	1	-5.56678	4.9557e-07	5.1288e-06
HPS1	0.398748	0.0094254	5.44657	5.11101e-07	5.28509e-06	5.62649	HPS1	12	5.44935	4.96866e-07	5.13789e-06
UXS1	0.511408	-0.0893159	5.42485	5.59128e-07	5.7241e-06	5.53912	UXS1	23	5.44703	5.01679e-07	5.18331e-06
OTX1	-1.08771	-0.364417	-5.44352	5.17582e-07	5.34315e-06	5.61423	OTX1	1	-5.44614	5.03521e-07	5.19799e-06
RFX2	-0.719974	0.193391	-5.47068	4.6252e-07	4.84781e-06	5.72367	RFX2	1	-5.44528	5.05338e-07	5.21238e-06
FLI1	0.604834	-0.0284946	5.4155	5.81153e-07	5.92656e-06	5.50154	FLI1	41	5.4436	5.08859e-07	5.24432e-06
JAKMIP1	-0.885064	-0.320585	-5.41624	5.79393e-07	5.91682e-06	5.50449	JAKMIP1	17	-5.43815	5.20502e-07	5.35983e-06
NKIRAS2	-0.31343	0.139022	-5.48155	4.42111e-07	4.66165e-06	5.76758	NKIRAS2	7	-5.43765	5.21581e-07	5.36645e-06
WHAMM	0.283452	-0.0496249	5.49564	4.16987e-07	4.42703e-06	5.82453	WHAMM	7	5.43629	5.24535e-07	5.39234e-06
UBASH3B	0.633596	0.00761203	5.40205	6.14339e-07	6.21703e-06	5.44754	UBASH3B	91	5.43431	5.28841e-07	5.43207e-06
NFKBIB	-0.242039	0.034372	-5.41544	5.81309e-07	5.92656e-06	5.50128	NFKBIB	24	-5.4334	5.30841e-07	5.44808e-06
ARID1A	-0.243783	0.112224	-5.33145	8.21341e-07	8.04758e-06	5.16524	ARID1A	235	-5.43014	5.38061e-07	5.51758e-06
ST3GAL4	-0.588017	-0.204451	-5.43114	5.44782e-07	5.59582e-06	5.5644	ST3GAL4	5	-5.42892	5.40795e-07	5.54102e-06
ZNF516	0.724478	-0.0170003	5.41216	5.89231e-07	6.00236e-06	5.48812	ZNF516	10	5.42805	5.42745e-07	5.55637e-06
PARP15	0.499767	-0.0391432	5.58871	3.60438e-07	3.91432e-06	6.0349	PARP15	1	5.48153	5.44142e-07	5.56605e-06
SGSM3	0.408988	-0.103178	5.40654	6.03049e-07	6.11785e-06	5.46557	SGSM3	21	5.42539	5.48757e-07	5.6086e-06
PKN3	0.710836	-0.166569	5.40795	5.99553e-07	6.08739e-06	5.47123	PKN3	11	5.42454	5.50695e-07	5.62375e-06
PDCL3	-0.248641	-0.0891276	-5.36913	7.0356e-07	7.01057e-06	5.31569	PDCL3	47	-5.42196	5.5662e-07	5.67956e-06
MFGE8	-0.682	0.242073	-5.39901	6.22075e-07	6.29015e-06	5.43537	MFGE8	16	-5.41878	5.63985e-07	5.74994e-06
SVBP	-0.47743	0.299376	-5.47135	4.61229e-07	4.83839e-06	5.72639	SVBP	2	-5.41806	5.6567e-07	5.76235e-06
SLAIN2	-0.216917	-0.0228649	-5.38665	6.54607e-07	6.58669e-06	5.3858	SLAIN2	29	-5.41767	5.66582e-07	5.76629e-06
ENTR1	0.354693	-0.034738	5.43853	5.28393e-07	5.43698e-06	5.59412	ENTR1	8	5.4175	5.66992e-07	5.76629e-06
PAFAH2	-0.661646	-0.0372291	-5.40339	6.10951e-07	6.18782e-06	5.45291	PAFAH2	9	-5.41627	5.69872e-07	5.7908e-06
ALDH4A1	0.695692	0.0714936	5.385	6.59047e-07	6.61996e-06	5.37923	ALDH4A1	67	5.41449	5.74105e-07	5.82901e-06
LIPT1	0.356422	0.0299395	5.52834	3.63967e-07	3.94569e-06	5.95691	LIPT1	2	5.41166	5.8085e-07	5.8921e-06
OAS2	0.896048	-0.2725	5.38483	6.59525e-07	6.61996e-06	5.37852	OAS2	51	5.41134	5.81626e-07	5.8921e-06
AKAP13	0.460842	0.0427722	5.36807	7.06645e-07	7.02995e-06	5.31143	AKAP13	162	5.41121	5.81934e-07	5.8921e-06
AGPAT1	-0.264262	0.0547851	-5.44914	5.05695e-07	5.24238e-06	5.63683	AGPAT1	10	-5.41109	5.82231e-07	5.8921e-06
PDP1	-0.370564	0.0697156	-5.38275	6.65206e-07	6.65576e-06	5.37018	PDP1	31	-5.41081	5.82916e-07	5.89419e-06
TRPC4AP	-0.29237	-0.143172	-5.392	6.4033e-07	6.4483e-06	5.40724	TRPC4AP	23	-5.40997	5.84939e-07	5.9098e-06
MYEF2	-0.95117	-0.0613302	-5.38451	6.60386e-07	6.62321e-06	5.37725	MYEF2	24	-5.40814	5.89381e-07	5.9498e-06
FSD1	-0.857289	0.143013	-5.39221	6.39765e-07	6.44787e-06	5.4081	FSD1	7	-5.40743	5.91122e-07	5.9595e-06
PRDX4	0.271675	-0.131269	5.35042	7.59813e-07	7.49236e-06	5.24092	PRDX4	62	5.40735	5.91309e-07	5.9595e-06
SLC25A13	0.660068	-0.00265144	5.37781	6.78872e-07	6.78102e-06	5.35041	SLC25A13	37	5.40436	5.9867e-07	6.02876e-06
ZFPM1	-0.634905	-0.0609623	-5.39385	6.35444e-07	6.40956e-06	5.41469	ZFPM1	8	-5.40401	5.99537e-07	6.03256e-06
CCNE2	-0.499991	-0.0516557	-5.4039	6.09659e-07	6.17982e-06	5.45497	CCNE2	7	-5.40197	6.04609e-07	6.07863e-06
POMK	-0.380529	0.0173083	-5.39783	6.25108e-07	6.31564e-06	5.43064	POMK	13	-5.4016	6.05541e-07	6.08305e-06
ZNF35	1.08799	-0.13569	5.60632	5.97372e-07	6.07525e-06	5.70109	ZNF35	1	5.5929	6.08461e-07	6.1074e-06
SMOX	-1.07845	-0.0167977	-5.60581	5.98517e-07	6.08188e-06	5.69256	SMOX	1	-5.59247	6.0944e-07	6.10958e-06
CENPO	-0.270249	-0.00119431	-5.48195	4.41393e-07	4.65805e-06	5.76917	CENPO	6	-5.39995	6.09669e-07	6.10958e-06
FAM98C	-0.471035	0.151025	-5.38603	6.56276e-07	6.59809e-06	5.38332	FAM98C	13	-5.39686	6.17522e-07	6.18113e-06
CHAF1A	-0.305632	-0.0503913	-5.3382	7.98901e-07	7.84642e-06	5.19216	CHAF1A	94	-5.39674	6.17812e-07	6.18113e-06
SERPINH1	0.561813	0.0138018	5.3636	7.19758e-07	7.13736e-06	5.29356	SERPINH1	67	5.3958	6.20232e-07	6.20031e-06
UBR1	0.21887	0.0803546	5.30458	9.16948e-07	8.86379e-06	5.05825	UBR1	84	5.39108	6.32433e-07	6.31715e-06
NFATC4	1.06111	-0.368775	5.36864	7.04971e-07	7.01896e-06	5.31374	NFATC4	11	5.38928	6.37161e-07	6.35458e-06
PIAS4	-0.218003	0.096778	-5.36957	7.02279e-07	7.00348e-06	5.31746	PIAS4	25	-5.38926	6.37211e-07	6.35458e-06
DMXL2	-0.498534	0.0719054	-5.35716	7.39068e-07	7.29364e-06	5.26782	DMXL2	46	-5.38792	6.40747e-07	6.38468e-06
USB1	-0.412515	-0.0432447	-5.59668	3.38894e-07	3.70648e-06	6.0887	USB1	1	-5.43243	6.45814e-07	6.42997e-06
SERPINB6	1.04757	-0.0808861	5.36053	7.28889e-07	7.20472e-06	5.2813	SERPINB6	31	5.38494	6.48675e-07	6.45324e-06
POLR1A	0.287269	-0.0159766	5.30936	8.9916e-07	8.72681e-06	5.07729	POLR1A	208	5.38458	6.49659e-07	6.45782e-06
FZD6	-0.840122	-0.338434	-5.36634	7.11669e-07	7.07422e-06	5.30455	FZD6	8	-5.38245	6.55395e-07	6.50959e-06
DROSHA	-0.197488	0.00734323	-5.32	8.60835e-07	8.38787e-06	5.11961	DROSHA	41	-5.37909	6.64543e-07	6.59513e-06
RALY	-0.234492	0.086255	-5.28677	9.86213e-07	9.41601e-06	4.98752	RALY	137	-5.3784	6.6645e-07	6.60874e-06
PYURF	0.28002	0.153515	5.38273	6.65252e-07	6.65576e-06	5.37012	PYURF	15	5.37796	6.67656e-07	6.61538e-06
CCSER2	-0.431514	0.032696	-5.41119	5.916e-07	6.02152e-06	5.48421	CCSER2	4	-5.37757	6.68737e-07	6.62077e-06
RAD51C	-0.392563	-0.119657	-5.36552	7.14073e-07	7.08669e-06	5.30127	RAD51C	16	-5.3767	6.71115e-07	6.63897e-06
ACTN4	0.377032	-0.0024973	5.31175	8.90422e-07	8.66246e-06	5.08677	ACTN4	548	5.37007	6.89724e-07	6.8176e-06
TMEM164	-0.677664	-0.0312815	-5.36178	7.25148e-07	7.18181e-06	5.28631	TMEM164	5	-5.3665	6.99961e-07	6.91324e-06
CYP51A1	0.975038	-0.348564	5.33967	7.94107e-07	7.80555e-06	5.19801	CYP51A1	56	5.36578	7.02056e-07	6.92837e-06
CCNI	-0.349044	0.0171409	-5.45005	5.03792e-07	5.22706e-06	5.6405	CCNI	3	-5.36488	7.04644e-07	6.94835e-06
MOB3B	0.831309	-0.224686	5.49092	6.61061e-07	6.62458e-06	5.50789	MOB3B	1	5.46309	7.19558e-07	7.08975e-06
FGFR1OP2	-0.276863	0.0686065	-5.32446	8.45247e-07	8.26211e-06	5.13736	FGFR1OP2	34	-5.35905	7.21803e-07	7.10619e-06
SUPT7L	-0.162584	0.0391604	-5.49635	4.15761e-07	4.42163e-06	5.82739	SUPT7L	10	-5.35652	7.29365e-07	7.1749e-06
TRIP6	0.603587	0.152374	5.32807	8.32818e-07	8.14708e-06	5.15176	TRIP6	25	5.35129	7.45225e-07	7.32507e-06
APBB2	0.757969	-0.22947	5.34426	7.79276e-07	7.67201e-06	5.21633	APBB2	4	5.34987	7.49605e-07	7.35984e-06
FEM1B	0.300993	-0.0826556	5.32817	8.32458e-07	8.14708e-06	5.15218	FEM1B	25	5.34976	7.49956e-07	7.35984e-06
CDK8	-0.375103	-0.108143	-5.35908	7.33254e-07	7.24206e-06	5.2755	CDK8	9	-5.34915	7.51838e-07	7.37244e-06
PREP	-0.318796	0.0756522	-5.28426	9.9639e-07	9.49846e-06	4.97754	PREP	206	-5.34887	7.52689e-07	7.37492e-06
DHODH	0.284693	-0.00733448	5.29816	9.4135e-07	9.0156e-06	5.03274	DHODH	52	5.346	7.61652e-07	7.45681e-06
DHTKD1	0.431648	0.0603281	5.30992	8.9713e-07	8.71397e-06	5.07948	DHTKD1	52	5.34416	7.67429e-07	7.50206e-06
EIF1AD	-0.216606	-0.0758563	-5.36169	7.25406e-07	7.18181e-06	5.28596	EIF1AD	16	-5.34414	7.67491e-07	7.50206e-06
EXTL2	-0.653329	-0.0100834	-5.37356	6.90835e-07	6.89492e-06	5.33343	EXTL2	1	-5.34035	7.79564e-07	7.6125e-06
CCDC138	-0.555412	-0.324067	-5.32269	8.5138e-07	8.30887e-06	5.13034	CCDC138	16	-5.34021	7.80025e-07	7.6125e-06
TBC1D2B	-0.510959	-0.0553612	-5.30372	9.20166e-07	8.88172e-06	5.05485	TBC1D2B	56	-5.33555	7.95097e-07	7.75346e-06
ADH5	-0.270913	0.165132	-5.25916	1.1039e-06	1.04346e-05	4.87803	ADH5	161	-5.33526	7.96042e-07	7.75654e-06
TUFM	0.214904	0.111785	5.21232	1.33571e-06	1.23604e-05	4.69299	TUFM	391	5.33435	7.99039e-07	7.77437e-06
CRAT	0.922175	-0.246207	5.31086	8.93683e-07	8.68733e-06	5.08322	CRAT	24	5.33415	7.99711e-07	7.77437e-06
ZNF543	-0.425599	0.152024	-5.38176	6.6792e-07	6.67703e-06	5.36623	ZNF543	3	-5.33413	7.99764e-07	7.77437e-06
TNS1	0.903201	-0.100812	5.33749	8.0123e-07	7.85677e-06	5.18933	TNS1	1	5.33176	8.07612e-07	7.84061e-06
ATP2B1	0.577707	0.105288	5.30165	9.27999e-07	8.92936e-06	5.04662	ATP2B1	56	5.33168	8.07851e-07	7.84061e-06
BMPR2	0.535926	-0.0201939	5.32396	8.46948e-07	8.27217e-06	5.13541	BMPR2	9	5.33138	8.08843e-07	7.84406e-06
PBLD	0.610707	0.0626897	5.32109	8.57001e-07	8.35711e-06	5.12394	PBLD	8	5.33039	8.12142e-07	7.86986e-06
CGAS	0.780898	-0.108106	5.30283	9.23547e-07	8.90131e-06	5.05129	CGAS	33	5.32768	8.21267e-07	7.95203e-06
NPC1	0.637295	-0.0564574	5.2982	9.41197e-07	9.0156e-06	5.0329	NPC1	33	5.32362	8.35062e-07	8.07926e-06
DNPEP	0.214031	0.0581973	5.24299	1.17909e-06	1.10858e-05	4.81405	DNPEP	71	5.3229	8.37557e-07	8.09704e-06
JUP	0.631568	-0.0344967	5.30114	9.29923e-07	8.9409e-06	5.0446	JUP	16	5.32003	8.47472e-07	8.18648e-06
PGM3	0.357429	-0.0642557	5.28407	9.97165e-07	9.4985e-06	4.97679	PGM3	42	5.31865	8.52301e-07	8.22668e-06
KYAT3	-0.243523	0.0599764	-5.24973	1.14715e-06	1.08102e-05	4.84072	KYAT3	73	-5.31774	8.55478e-07	8.25087e-06
LY75	0.498983	-0.17835	5.36064	7.28566e-07	7.20472e-06	5.28174	LY75	2	5.31748	8.56393e-07	8.25324e-06
MCTP2	0.791117	-0.153156	5.30261	9.24361e-07	8.90131e-06	5.05043	MCTP2	7	5.3164	8.60214e-07	8.28359e-06
CDK18	0.3705	-0.0194256	5.33772	8.00493e-07	7.85579e-06	5.19023	CDK18	6	5.30849	8.88592e-07	8.55019e-06
RGPD8	-0.926061	-0.349107	-5.36065	8.78347e-07	8.55174e-06	5.16179	RGPD8	1	-5.3522	8.91767e-07	8.57177e-06
ARSK	-0.449915	0.0861505	-5.36594	7.12837e-07	7.08012e-06	5.30295	ARSK	2	-5.3075	8.92227e-07	8.57177e-06
LRRC8D	0.49485	-0.0892281	5.27852	1.02002e-06	9.69369e-06	4.95478	LRRC8D	33	5.305	9.01395e-07	8.65311e-06
SMYD5	-0.324927	0.00320768	-5.29044	9.71557e-07	9.28326e-06	5.00206	SMYD5	20	-5.30449	9.03289e-07	8.66186e-06
CARD9	0.927574	-0.19902	5.29974	9.35269e-07	8.97829e-06	5.03904	CARD9	2	5.30438	9.03712e-07	8.66186e-06
LPGAT1	0.448039	-0.0714295	5.30682	9.0858e-07	8.81129e-06	5.06716	LPGAT1	8	5.30399	9.05163e-07	8.66903e-06
ATRNL1	1.04264	0.0576982	5.30077	9.3134e-07	8.94755e-06	5.04312	ATRNL1	1	5.30265	9.10128e-07	8.70981e-06
CAMSAP1	0.276257	-0.00393524	5.2327	1.2295e-06	1.15158e-05	4.77342	CAMSAP1	113	5.29987	9.20582e-07	8.79074e-06
PANK2	-0.32383	0.0421011	-5.30275	9.23823e-07	8.90131e-06	5.051	PANK2	13	-5.29986	9.206e-07	8.79074e-06
ORAI1	-0.640981	0.0519501	-5.29367	9.5878e-07	9.16829e-06	5.01492	ORAI1	6	-5.29983	9.20724e-07	8.79074e-06
MRGBP	-0.24382	0.0297726	-5.30445	9.17424e-07	8.86379e-06	5.05775	MRGBP	16	-5.29634	9.34002e-07	8.91061e-06
NOVA1	-1.00362	-0.121551	-5.7885	7.90464e-07	7.77594e-06	5.63273	NOVA1	1	-5.71821	9.45007e-07	9.00863e-06
EEF1AKMT2	-0.367716	0.0837362	-5.34467	7.77967e-07	7.66525e-06	5.21797	EEF1AKMT2	4	-5.29229	9.49651e-07	9.0459e-06
CEP128	-0.316376	0.0325943	-5.23734	1.20652e-06	1.13264e-05	4.79173	CEP128	92	-5.29093	9.54954e-07	9.08939e-06
CHST2	-1.14761	-0.638396	-5.28473	9.94485e-07	9.48763e-06	4.9794	CHST2	1	-5.29048	9.56692e-07	9.09519e-06
ATG13	-0.178357	0.0426959	-5.30456	9.17009e-07	8.86379e-06	5.05819	ATG13	19	-5.29039	9.57039e-07	9.09519e-06
STAT4	-0.992566	-0.722304	-5.27919	1.01724e-06	9.67481e-06	4.95743	STAT4	2	-5.28632	9.73136e-07	9.24104e-06
DTWD2	-0.72077	-0.224505	-5.28163	1.00716e-06	9.58627e-06	4.9671	DTWD2	4	-5.28574	9.75466e-07	9.25604e-06
LTF	-0.65627	-0.0206991	-5.29921	9.373e-07	8.99078e-06	5.03693	LTF	2	-5.28509	9.78049e-07	9.27341e-06
EMILIN1	0.841995	0.0248368	5.26302	1.08665e-06	1.02873e-05	4.89333	EMILIN1	17	5.28422	9.81556e-07	9.29951e-06
SIT1	-0.903904	-0.233894	-5.26124	1.09456e-06	1.03542e-05	4.88628	SIT1	14	-5.28176	9.91489e-07	9.3864e-06
PPM1A	-0.252455	0.142488	-5.22372	1.27523e-06	1.18989e-05	4.73797	PPM1A	51	-5.27586	1.01571e-06	9.60828e-06
ATF7	0.336026	-0.121662	5.30441	9.17589e-07	8.86379e-06	5.05758	ATF7	7	5.27399	1.02352e-06	9.67477e-06
ABHD4	0.612966	0.0125904	5.27475	1.03584e-06	9.82139e-06	4.93983	ABHD4	4	5.27155	1.03381e-06	9.76455e-06
MTDH	0.229426	-0.0167186	5.16005	1.65084e-06	1.4984e-05	4.48747	MTDH	160	5.25263	1.11694e-06	1.05358e-05
ZNF618	0.771539	-0.26017	5.22776	1.25445e-06	1.17228e-05	4.75391	ZNF618	35	5.25254	1.11731e-06	1.05358e-05
GAS2L3	0.900075	0.0563072	5.47271	1.0252e-06	9.73543e-06	5.17703	GAS2L3	1	5.4411	1.11803e-06	1.05358e-05
MICAL1	0.533729	0.0136276	5.21735	1.30871e-06	1.21526e-05	4.71281	MICAL1	110	5.25202	1.11971e-06	1.05436e-05
GLA	0.512435	0.303498	5.22908	1.24774e-06	1.16689e-05	4.75912	GLA	23	5.2506	1.12621e-06	1.05967e-05
DNAJB12	-0.305612	-0.198723	-5.23393	1.2234e-06	1.14674e-05	4.77824	DNAJB12	21	-5.24872	1.13489e-06	1.06702e-05
METTL8	0.34212	-0.0655677	5.25857	1.10656e-06	1.04516e-05	4.8757	METTL8	10	5.24834	1.13668e-06	1.06789e-05
EXT1	-0.717603	0.1873	-5.31995	1.03346e-06	9.80631e-06	5.00372	EXT1	1	-5.28974	1.14494e-06	1.07483e-05
SLC25A15	0.639998	-0.248328	5.22269	1.28062e-06	1.19402e-05	4.73387	SLC25A15	25	5.24553	1.14978e-06	1.07855e-05
ALDH7A1	1.07294	-0.140305	5.22036	1.29279e-06	1.20264e-05	4.72469	ALDH7A1	44	5.24492	1.15263e-06	1.07953e-05
NNT	0.368042	0.0371019	5.18992	1.46279e-06	1.34154e-05	4.6048	NNT	324	5.24484	1.15304e-06	1.07953e-05
ABCA2	0.485734	0.0798709	5.24031	1.192e-06	1.11986e-05	4.80348	ABCA2	9	5.24475	1.15345e-06	1.07953e-05
TRMT5	-0.491806	0.0392688	-5.21468	1.32296e-06	1.22608e-05	4.7023	TRMT5	45	-5.24423	1.15589e-06	1.08099e-05
UBAC1	0.201343	-0.0282144	5.18689	1.48086e-06	1.35711e-05	4.59288	UBAC1	42	5.24304	1.16152e-06	1.08544e-05
HYKK	-0.696455	0.160313	-5.49319	9.1162e-07	8.83383e-06	5.28274	HYKK	1	-5.41934	1.16546e-06	1.0883e-05
MICAL3	0.466592	-0.0492333	5.20505	1.37575e-06	1.26927e-05	4.66433	MICAL3	78	5.24056	1.17336e-06	1.09484e-05
FCGR2A	1.0546	0.0260776	5.41799	1.15983e-06	1.0913e-05	5.04013	FCGR2A	1	5.40686	1.17553e-06	1.09533e-05
PRKAB1	-0.258443	0.0664125	-5.22165	1.28602e-06	1.19815e-05	4.72978	PRKAB1	24	-5.24008	1.17566e-06	1.09533e-05
ENOSF1	-0.823167	-0.19201	-5.21705	1.31031e-06	1.21526e-05	4.71163	ENOSF1	13	-5.23638	1.19349e-06	1.11109e-05
CLIP4	-0.317384	0.032368	-5.29538	9.52126e-07	9.11172e-06	5.02168	CLIP4	5	-5.2362	1.19438e-06	1.11109e-05
LSM4	-0.186377	0.0572208	-5.14611	1.74647e-06	1.57477e-05	4.43285	LSM4	65	-5.23489	1.20077e-06	1.11619e-05
ZCCHC7	0.305918	-0.0902504	5.21267	1.3338e-06	1.23519e-05	4.69438	ZCCHC7	25	5.23395	1.20543e-06	1.11968e-05
IRS2	0.757596	-0.116199	5.21027	1.34688e-06	1.2445e-05	4.68491	IRS2	18	5.23116	1.21921e-06	1.13163e-05
MVB12B	-0.742293	0.0271869	-5.21068	1.34462e-06	1.24334e-05	4.68654	MVB12B	10	-5.22691	1.24048e-06	1.1505e-05
TCF4	0.55291	-0.0407123	5.2043	1.37994e-06	1.27219e-05	4.66138	TCF4	21	5.22494	1.25049e-06	1.15891e-05
LMBR1	-0.384803	0.0325069	-5.26652	1.07125e-06	1.01493e-05	4.90719	LMBR1	4	-5.22325	1.25913e-06	1.16604e-05
ARPC5L	0.39335	-0.121067	5.19483	1.43396e-06	1.31879e-05	4.62411	ARPC5L	33	5.22243	1.26335e-06	1.16908e-05
PDE4B	1.00986	-0.0702597	5.40204	1.23097e-06	1.15208e-05	4.98938	PDE4B	1	5.38625	1.26986e-06	1.1734e-05
WASHC1	0.192272	0.0217202	5.22396	1.27401e-06	1.18966e-05	4.73889	WASHC1	20	5.22114	1.27e-06	1.1734e-05
TENM4	1.12438	-0.620766	5.19815	1.41478e-06	1.30236e-05	4.63718	TENM4	23	5.22097	1.27088e-06	1.1734e-05
CCDC91	-0.552096	0.00987604	-5.19349	1.4418e-06	1.32328e-05	4.61882	CCDC91	40	-5.22062	1.27269e-06	1.17419e-05
VAPA	-0.234413	0.0975477	-5.12928	1.86924e-06	1.67565e-05	4.36698	VAPA	173	-5.21906	1.28084e-06	1.18082e-05
LEMD3	0.257592	0.0111269	5.15937	1.65537e-06	1.5014e-05	4.48481	LEMD3	64	5.21634	1.29509e-06	1.19307e-05
SLAIN1	0.336934	-0.16594	5.19451	1.43584e-06	1.31879e-05	4.62284	SLAIN1	23	5.21358	1.30969e-06	1.20562e-05
MTMR3	-0.188617	0.0653151	-5.13264	1.84405e-06	1.65669e-05	4.38013	MTMR3	54	-5.2084	1.33761e-06	1.2304e-05
USP42	-0.288242	-0.0608555	-5.17913	1.52817e-06	1.39734e-05	4.56237	USP42	28	-5.20444	1.35935e-06	1.24933e-05
LRIF1	0.498341	0.0867945	5.17718	1.54029e-06	1.40732e-05	4.55471	LRIF1	37	5.20428	1.36022e-06	1.24933e-05
SETD6	0.852576	-0.502793	5.19946	1.40728e-06	1.29642e-05	4.64234	SETD6	2	5.20143	1.3761e-06	1.26298e-05
DHCR24	-0.810983	-0.331436	-5.17643	1.54497e-06	1.40957e-05	4.55176	DHCR24	27	-5.19963	1.38622e-06	1.27045e-05
RAB3GAP1	0.227109	0.015626	5.11211	2.00309e-06	1.78267e-05	4.29993	RAB3GAP1	132	5.19961	1.3863e-06	1.27045e-05
ADK	0.352336	0.0152825	5.14292	1.7691e-06	1.594e-05	4.42037	ADK	158	5.19462	1.41472e-06	1.29553e-05
FBXW7	0.554424	-0.233443	5.19468	1.43487e-06	1.31879e-05	4.6235	FBXW7	5	5.19182	1.4309e-06	1.30938e-05
TTC21B	-0.418759	-0.15717	-5.17165	1.57515e-06	1.43498e-05	4.533	TTC21B	21	-5.19032	1.43964e-06	1.31639e-05
BICDL1	-0.837957	-0.0174784	-5.39659	1.30549e-06	1.21353e-05	4.93329	BICDL1	1	-5.35898	1.45912e-06	1.33322e-05
NECTIN2	0.714682	-0.218378	5.16492	1.61866e-06	1.47027e-05	4.50657	NECTIN2	20	5.18612	1.46443e-06	1.33708e-05
ZNF566	0.361949	0.10953	5.25364	1.12902e-06	1.06557e-05	4.85618	ZNF566	3	5.18551	1.46805e-06	1.3394e-05
SCN3A	-1.32925	0.0151929	-6.36117	1.1359e-06	1.07124e-05	5.57692	SCN3A	1	-6.20671	1.47216e-06	1.34214e-05
SLC8A1	0.997013	-0.130369	5.1655	1.61488e-06	1.46792e-05	4.50884	SLC8A1	7	5.18279	1.48437e-06	1.35228e-05
UGT8	0.892576	-0.38475	5.17701	1.54136e-06	1.40732e-05	4.55404	UGT8	2	5.18097	1.49536e-06	1.36128e-05
ICE1	-0.222858	0.0628868	-5.13573	1.82124e-06	1.63978e-05	4.3922	ICE1	36	-5.17681	1.52082e-06	1.38344e-05
DICER1	-0.350014	0.0858398	-5.12299	1.91724e-06	1.71245e-05	4.3424	DICER1	139	-5.17346	1.54163e-06	1.40134e-05
TMEM97	0.30242	-0.0462317	5.17053	1.58231e-06	1.44044e-05	4.5286	TMEM97	15	5.17169	1.55277e-06	1.41043e-05
AGPAT2	0.468106	-0.0314949	5.17317	1.56551e-06	1.42725e-05	4.53895	AGPAT2	7	5.1702	1.56219e-06	1.41794e-05
DAPP1	0.810469	-0.345615	5.15129	1.71033e-06	1.5467e-05	4.45314	DAPP1	8	5.16682	1.5837e-06	1.4364e-05
ISG20L2	0.288225	-0.0558309	5.13386	1.83498e-06	1.64974e-05	4.38491	ISG20L2	33	5.16473	1.59723e-06	1.4476e-05
SH3RF3	1.26197	-0.0816555	5.15064	1.71485e-06	1.54965e-05	4.45057	SH3RF3	2	5.16416	1.60088e-06	1.44985e-05
NSFL1C	-0.220287	0.0504588	-5.07415	2.33323e-06	2.04136e-05	4.15206	NSFL1C	131	-5.1639	1.60257e-06	1.45031e-05
PSTPIP1	-0.899011	-0.157213	-5.14798	1.73334e-06	1.56522e-05	4.44017	PSTPIP1	5	-5.16127	1.61977e-06	1.46481e-05
TBK1	0.442422	-0.0273702	5.12385	1.91061e-06	1.70778e-05	4.34575	TBK1	57	5.15672	1.64987e-06	1.49093e-05
PRDX3	0.23602	0.148239	5.06814	2.39017e-06	2.08354e-05	4.1287	PRDX3	195	5.15644	1.65178e-06	1.49156e-05
SAYSD1	-0.82657	0.123464	-5.35166	1.48514e-06	1.36002e-05	4.79969	SAYSD1	1	-5.31498	1.65721e-06	1.49537e-05
RIN1	0.904849	-0.103073	5.15882	1.65906e-06	1.50263e-05	4.48266	RIN1	1	5.15524	1.65983e-06	1.49664e-05
PRADC1	-0.427437	-0.070797	-5.24872	1.15187e-06	1.08464e-05	4.83673	PRADC1	1	-5.15	1.69539e-06	1.52759e-05
DTX3	-1.35761	-0.392719	-5.13478	1.82822e-06	1.64487e-05	4.38849	DTX3	2	-5.14959	1.69821e-06	1.52901e-05
GTF3C5	-0.249826	0.0727904	-5.09241	2.16834e-06	1.9118e-05	4.22309	GTF3C5	58	-5.14672	1.71804e-06	1.54573e-05
CD1E	-1.80286	-0.819663	-5.16728	1.89374e-06	1.69639e-05	4.42175	CD1E	1	-5.18434	1.7408e-06	1.56468e-05
RPGR	-0.335759	0.123549	-5.13189	1.84962e-06	1.65927e-05	4.37721	RPGR	18	-5.14335	1.74164e-06	1.56468e-05
SOX4	-0.540048	0.0803315	-5.15881	1.65916e-06	1.50263e-05	4.48259	SOX4	3	-5.1423	1.74909e-06	1.57024e-05
DNLZ	0.284026	-0.0158373	5.23655	1.21039e-06	1.13541e-05	4.78862	DNLZ	4	5.14127	1.75637e-06	1.57562e-05
HK1	-0.579048	0.0135154	-5.10473	2.06348e-06	1.8285e-05	4.27113	HK1	194	-5.13847	1.7764e-06	1.59215e-05
PIP4K2A	-0.493757	-0.0486483	-5.1132	1.99436e-06	1.77619e-05	4.30416	PIP4K2A	32	-5.13833	1.77738e-06	1.59215e-05
RPE	0.194504	0.109026	5.10372	2.07186e-06	1.83329e-05	4.2672	RPE	30	5.13653	1.79035e-06	1.60261e-05
DPYD	-0.851758	0.185912	-5.11048	2.0163e-06	1.79185e-05	4.29355	DPYD	39	-5.13478	1.80308e-06	1.61282e-05
CARM1	0.245145	-0.0169375	5.07135	2.35958e-06	2.06271e-05	4.14118	CARM1	68	5.13149	1.82725e-06	1.63326e-05
XPO4	0.240121	-0.0349469	5.06225	2.44731e-06	2.12883e-05	4.10581	XPO4	85	5.13034	1.83571e-06	1.63963e-05
NUDT8	-0.532161	-0.0340738	-5.14668	1.7425e-06	1.57233e-05	4.43506	NUDT8	3	-5.12923	1.84397e-06	1.64582e-05
ZNF341	0.270076	-0.0372572	5.41995	5.70565e-07	5.83149e-06	5.51943	ZNF341	1	5.12552	1.87181e-06	1.66946e-05
AMMECR1	0.517184	-0.302617	5.15598	1.67821e-06	1.51876e-05	4.47152	AMMECR1	2	5.12329	1.88878e-06	1.68337e-05
STAMBPL1	-0.694388	-0.0523199	-5.09943	2.10798e-06	1.86257e-05	4.25045	STAMBPL1	29	-5.12276	1.89284e-06	1.68466e-05
FBXO3	0.248758	0.0967557	5.11447	1.98413e-06	1.76835e-05	4.30915	FBXO3	20	5.1226	1.89404e-06	1.68466e-05
COMMD8	-0.277513	-0.00749364	-5.09756	2.12391e-06	1.87531e-05	4.24315	COMMD8	28	-5.12256	1.89432e-06	1.68466e-05
TTK	-0.450149	0.0141138	-5.08721	2.21407e-06	1.94933e-05	4.20286	TTK	75	-5.1219	1.89936e-06	1.68793e-05
SORT1	-0.669342	-0.226905	-5.09592	2.13795e-06	1.88635e-05	4.23677	SORT1	39	-5.12106	1.90583e-06	1.69245e-05
ZNF655	-0.262179	0.108229	-5.12519	1.90031e-06	1.6998e-05	4.35099	ZNF655	15	-5.11971	1.91623e-06	1.70047e-05
INA	-1.33508	-0.514903	-5.10005	2.10272e-06	1.85927e-05	4.25287	INA	5	-5.11853	1.92544e-06	1.70741e-05
CSNK2A1	-0.199861	-0.097	-5.16569	1.61361e-06	1.46785e-05	4.5096	CSNK2A1	12	-5.11676	1.93924e-06	1.71841e-05
NOG	1.09823	0.09483	5.1109	2.0129e-06	1.79012e-05	4.29519	NOG	1	5.1161	1.94442e-06	1.72176e-05
PTPN4	-0.429109	-0.0301398	-5.20947	1.35123e-06	1.24759e-05	4.68178	PTPN4	1	-5.11414	1.95988e-06	1.73349e-05
ARFGAP1	-0.241289	-0.00443036	-5.07412	2.3335e-06	2.04136e-05	4.15195	ARFGAP1	38	-5.11406	1.96048e-06	1.73349e-05
SMYD3	-0.312761	0.0465334	-5.08069	2.27278e-06	1.99675e-05	4.1775	SMYD3	37	-5.11299	1.96897e-06	1.73975e-05
ATM	0.554246	0.182707	5.07504	2.32498e-06	2.03824e-05	4.15549	ATM	156	5.10874	2.00298e-06	1.76853e-05
CAP2	1.15711	-0.123864	5.09033	2.18651e-06	1.92644e-05	4.215	CAP2	6	5.10826	2.0069e-06	1.77072e-05
MAML2	0.892736	-0.261514	5.10932	2.02577e-06	1.79638e-05	4.28901	MAML2	1	5.10556	2.02882e-06	1.78879e-05
PIN1	-0.176531	0.100393	-5.02301	2.8633e-06	2.43736e-05	3.95375	PIN1	54	-5.10206	2.05766e-06	1.81292e-05
PLEKHA1	-1.08976	0.0435733	-5.08671	2.2185e-06	1.95184e-05	4.20092	PLEKHA1	4	-5.10178	2.06002e-06	1.8137e-05
KIF5A	-0.69507	-0.0456793	-5.16692	1.89641e-06	1.69754e-05	4.41427	KIF5A	1	-5.13729	2.09657e-06	1.84456e-05
DCAF15	-0.259781	-0.0608024	-5.12083	1.93396e-06	1.72614e-05	4.33398	DCAF15	11	-5.09634	2.10571e-06	1.85129e-05
SETD7	0.471047	-0.107008	5.07007	2.3718e-06	2.07046e-05	4.13617	SETD7	34	5.09591	2.10931e-06	1.85313e-05
CTDSP1	0.352639	0.113738	5.11024	2.01827e-06	1.79231e-05	4.29261	CTDSP1	8	5.09497	2.11733e-06	1.85885e-05
TLE1	0.713268	-0.328277	5.07582	2.3177e-06	2.03331e-05	4.15853	TLE1	15	5.09472	2.11948e-06	1.85941e-05
ZNF714	-0.481118	-0.0925796	-5.22178	1.52681e-06	1.39714e-05	4.62465	ZNF714	1	-5.13086	2.15039e-06	1.88519e-05
ANKMY2	-0.537415	0.0985475	-5.066	2.41079e-06	2.10002e-05	4.12038	ANKMY2	32	-5.09051	2.15572e-06	1.88851e-05
CTNND1	0.815606	0.0211243	5.06541	2.41647e-06	2.10349e-05	4.1181	CTNND1	41	5.08979	2.162e-06	1.89267e-05
RRP8	0.188507	0.0269346	5.03222	2.75989e-06	2.36403e-05	3.98937	RRP8	41	5.08751	2.18194e-06	1.90877e-05
PTP4A1	0.426539	0.0396651	5.104	2.06955e-06	1.83257e-05	4.26828	PTP4A1	5	5.08525	2.20181e-06	1.92478e-05
TYMS	-0.426283	-0.128701	-5.04703	2.60108e-06	2.24989e-05	4.04678	TYMS	89	-5.08412	2.21191e-06	1.93225e-05
C12orf73	-0.270823	-0.0520426	-5.21716	1.30971e-06	1.21526e-05	4.71207	C12orf73	3	-5.08335	2.21871e-06	1.93682e-05
POLE2	-0.361302	-0.0498097	-5.06155	2.45416e-06	2.13329e-05	4.1031	POLE2	25	-5.08283	2.22337e-06	1.93951e-05
TMEM179B	0.380979	-0.0187433	5.12039	1.93743e-06	1.72799e-05	4.33224	TMEM179B	4	5.08059	2.24348e-06	1.95566e-05
SAT2	0.574037	0.230126	5.07583	2.31755e-06	2.03331e-05	4.15859	SAT2	6	5.0793	2.25517e-06	1.96447e-05
ERGIC3	-0.213208	0.011073	-5.03002	2.78419e-06	2.38154e-05	3.98088	ERGIC3	41	-5.07805	2.26659e-06	1.97302e-05
RAB5IF	-0.311632	0.0340916	-5.1321	1.84809e-06	1.65911e-05	4.37801	RAB5IF	5	-5.07677	2.27828e-06	1.9818e-05
DCXR	0.327017	0.031932	5.05008	2.56954e-06	2.22417e-05	4.05859	DCXR	30	5.07605	2.28489e-06	1.98615e-05
AGL	-0.466443	0.0112791	-5.03409	2.7393e-06	2.34803e-05	3.99663	AGL	131	-5.07094	2.33225e-06	2.02589e-05
ESAM	1.28768	-0.726734	5.05154	2.55462e-06	2.2128e-05	4.06424	ESAM	6	5.0703	2.33829e-06	2.0297e-05
APBB1IP	0.546177	0.00672348	5.03844	2.69212e-06	2.31403e-05	4.01345	APBB1IP	82	5.06931	2.34765e-06	2.0364e-05
CDK9	0.21301	0.0582121	5.01798	2.92142e-06	2.48082e-05	3.93429	CDK9	43	5.0682	2.35814e-06	2.04405e-05
RFC3	-0.170486	0.03423	-4.97871	3.41617e-06	2.85476e-05	3.78283	RFC3	60	-5.06719	2.36767e-06	2.05087e-05
TNFSF10	-1.86183	-0.226416	-5.61769	2.66463e-06	2.2968e-05	4.57525	TNFSF10	1	-5.62942	2.40038e-06	2.07775e-05
TTC33	-0.375989	0.0227539	-5.03862	2.69017e-06	2.31403e-05	4.01415	TTC33	29	-5.063	2.40791e-06	2.0828e-05
CD1C	-1.38701	-0.63289	-5.0447	2.62553e-06	2.26785e-05	4.03771	CD1C	3	-5.06154	2.42201e-06	2.09353e-05
PUS3	-0.37624	-0.108034	-5.04598	2.61205e-06	2.2578e-05	4.0427	PUS3	19	-5.06111	2.4262e-06	2.09568e-05
GABPB2	-0.431239	0.117503	-5.05458	2.5237e-06	2.18756e-05	4.07603	GABPB2	11	-5.06046	2.43261e-06	2.09975e-05
POLE	-0.317823	0.0157897	-5.00466	3.08079e-06	2.59917e-05	3.88286	POLE	146	-5.05878	2.44901e-06	2.11116e-05
GPR174	-1.23717	0.114241	-5.71083	2.2261e-06	1.95713e-05	4.76583	GPR174	1	-5.65395	2.44926e-06	2.11116e-05
HAGHL	0.61412	-0.231051	5.05748	2.49456e-06	2.16535e-05	4.08728	HAGHL	4	5.05655	2.47112e-06	2.12851e-05
SCP2	-0.316682	-0.0312117	-5.00342	3.09606e-06	2.61026e-05	3.87808	SCP2	104	-5.05371	2.49936e-06	2.15133e-05
ZFAT	0.195711	0.042414	5.10987	2.02129e-06	1.7937e-05	4.29116	ZFAT	11	5.05063	2.53046e-06	2.17659e-05
DNAJB1	-0.173485	0.0349438	-4.93619	4.04403e-06	3.3209e-05	3.61958	DNAJB1	106	-5.05026	2.5342e-06	2.17828e-05
SESN3	0.806008	-0.0326772	5.04312	2.64212e-06	2.27899e-05	4.03161	SESN3	3	5.04894	2.54774e-06	2.18839e-05
MRPL10	0.235302	0.0759391	5.01199	2.99205e-06	2.53471e-05	3.91116	MRPL10	35	5.04821	2.55515e-06	2.19323e-05
SLC4A1AP	-0.189325	-0.0134442	-4.95051	3.82096e-06	3.16088e-05	3.67447	SLC4A1AP	96	-5.04648	2.57291e-06	2.20694e-05
SLC45A4	-0.861176	-0.3042	-5.23509	2.37017e-06	2.07046e-05	4.36066	SLC45A4	1	-5.2049	2.58079e-06	2.21216e-05
PIGA	-0.503238	-0.0435077	-5.03847	2.6918e-06	2.31403e-05	4.01357	PIGA	9	-5.04525	2.58572e-06	2.21485e-05
YBX2	-1.19045	-0.104868	-5.07673	2.70295e-06	2.3201e-05	4.07062	YBX2	1	-5.08376	2.58816e-06	2.21539e-05
KLC2	-0.34184	-0.0993224	-5.01435	2.96396e-06	2.51436e-05	3.92029	KLC2	37	-5.04447	2.59379e-06	2.21867e-05
FYN	-0.550315	-0.178638	-5.02714	2.81651e-06	2.40584e-05	3.96971	FYN	16	-5.04421	2.59644e-06	2.2194e-05
KCNQ5	0.727716	-0.120995	5.03144	2.76847e-06	2.36973e-05	3.98637	KCNQ5	7	5.04392	2.59946e-06	2.22044e-05
TLR6	0.87297	-0.445122	5.13258	2.63692e-06	2.2761e-05	4.16339	TLR6	2	5.13094	2.60199e-06	2.22106e-05
RBMXL1	0.270184	0.13686	5.05812	2.48817e-06	2.16132e-05	4.08977	RBMXL1	12	5.04334	2.60555e-06	2.22256e-05
NME7	-0.262848	0.0974785	-5.00259	3.10639e-06	2.61718e-05	3.87485	NME7	41	-5.04142	2.62571e-06	2.23821e-05
SMS	0.270679	0.0670863	4.97439	3.47539e-06	2.89248e-05	3.7662	SMS	147	5.03987	2.64206e-06	2.25059e-05
USP33	0.289111	-0.0569655	5.03512	2.72802e-06	2.33999e-05	4.00062	USP33	16	5.03819	2.65986e-06	2.26419e-05
PPM1M	-0.583294	-0.148424	-5.05655	2.50386e-06	2.17189e-05	4.08368	PPM1M	2	-5.03764	2.66574e-06	2.26763e-05
CERS4	1.02075	-0.231998	5.19	2.70279e-06	2.3201e-05	4.21801	CERS4	1	5.18022	2.73363e-06	2.32377e-05
APAF1	0.390875	0.156286	4.99944	3.14561e-06	2.64841e-05	3.8627	APAF1	46	5.03083	2.73954e-06	2.3272e-05
SPRED2	-0.478473	-0.166024	-5.06878	2.38411e-06	2.07973e-05	4.13116	SPRED2	2	-5.02969	2.75202e-06	2.33618e-05
FUT11	0.785234	0.0632663	5.02356	2.85706e-06	2.43542e-05	3.95586	FUT11	2	5.02341	2.82212e-06	2.39404e-05
DENND5A	0.586684	0.0205574	5.0112	3.00152e-06	2.54099e-05	3.9081	DENND5A	9	5.02218	2.83606e-06	2.40421e-05
SEMA6C	1.15739	-0.123254	5.27301	2.85618e-06	2.43542e-05	4.26524	SEMA6C	1	5.26408	2.85004e-06	2.4144e-05
PPM1F	0.491799	0.0158854	4.99062	3.25802e-06	2.73558e-05	3.82871	PPM1F	57	5.02037	2.85661e-06	2.41831e-05
KLHL14	0.938774	-0.294027	5.01234	2.98788e-06	2.53292e-05	3.91251	KLHL14	2	5.01899	2.87243e-06	2.43004e-05
SLC25A30	0.692868	-0.153838	5.02333	2.85962e-06	2.43592e-05	3.95499	SLC25A30	2	5.01683	2.89742e-06	2.44949e-05
WDR6	-0.222136	-0.0374984	-4.96989	3.53803e-06	2.93866e-05	3.74891	WDR6	42	-5.01586	2.90861e-06	2.45727e-05
PRKAG1	-0.247179	0.071336	-4.9837	3.34896e-06	2.80812e-05	3.80206	PRKAG1	31	-5.01316	2.94019e-06	2.48174e-05
SLC25A1	0.295381	0.143547	4.9878	3.29487e-06	2.76464e-05	3.81783	SLC25A1	29	5.01304	2.94161e-06	2.48174e-05
IARS1	0.190942	-0.00527491	4.88552	4.94044e-06	3.97492e-05	3.42597	IARS1	430	5.01196	2.95438e-06	2.49081e-05
WARS2	0.320036	0.125836	4.9835	3.35166e-06	2.80847e-05	3.80129	WARS2	33	5.01164	2.95817e-06	2.49231e-05
TNFRSF1A	-0.563837	0.164558	-5.00754	3.04564e-06	2.5748e-05	3.89397	TNFRSF1A	6	-5.01079	2.96813e-06	2.49898e-05
TTC7A	0.357581	-0.00125545	4.9758	3.45595e-06	2.88019e-05	3.77163	TTC7A	51	5.01036	2.97327e-06	2.5016e-05
RP2	0.366938	0.112684	4.9778	3.42857e-06	2.86124e-05	3.77933	RP2	42	5.00873	2.99274e-06	2.51627e-05
SPRYD4	0.413723	0.268891	4.99137	3.24836e-06	2.72933e-05	3.83159	SPRYD4	18	5.0067	3.01715e-06	2.53506e-05
GTF3C1	-0.170826	0.0699667	-4.87104	5.23031e-06	4.18357e-05	3.37086	GTF3C1	196	-5.00592	3.02657e-06	2.54125e-05
BCAT1	0.752271	-0.104975	4.97733	3.435e-06	2.86467e-05	3.77751	BCAT1	139	5.00498	3.0379e-06	2.54902e-05
PSMB10	0.417336	0.0535134	4.96593	3.59408e-06	2.9812e-05	3.7337	PSMB10	63	4.99939	3.1065e-06	2.60481e-05
HPS5	0.252284	0.0376227	4.95943	3.68813e-06	3.05716e-05	3.70871	HPS5	41	4.99903	3.111e-06	2.60681e-05
HJURP	-0.344097	-0.084518	-4.97541	3.46131e-06	2.88271e-05	3.77013	HJURP	26	-4.9972	3.13374e-06	2.62409e-05
UBE2Z	0.205493	0.0913385	4.94599	3.89008e-06	3.20302e-05	3.65712	UBE2Z	43	4.9967	3.13997e-06	2.62751e-05
MYRIP	1.09428	-0.132936	5.07995	3.22197e-06	2.709e-05	3.97585	MYRIP	1	5.08075	3.15163e-06	2.63548e-05
HINT1	-0.28331	-0.0114849	-4.93569	4.05206e-06	3.32528e-05	3.61766	HINT1	117	-4.99313	3.18506e-06	2.66163e-05
RAB39B	-0.66424	-0.0964864	-4.97825	3.42238e-06	2.85801e-05	3.78108	RAB39B	10	-4.99282	3.189e-06	2.66311e-05
C2orf49	-0.216308	-0.0189198	-4.98083	3.3874e-06	2.83456e-05	3.79102	C2orf49	22	-4.99142	3.20685e-06	2.67621e-05
CNNM2	-0.316738	-0.0286851	-5.07459	2.32914e-06	2.04044e-05	4.15376	CNNM2	3	-4.99008	3.22413e-06	2.68881e-05
TXNRD3	-0.589603	0.0573355	-5.00583	3.06646e-06	2.58885e-05	3.88738	TXNRD3	2	-4.98877	3.24096e-06	2.70102e-05
NMNAT3	-1.08696	-0.0940547	-4.98136	3.38038e-06	2.83061e-05	3.79303	NMNAT3	1	-4.98694	3.26473e-06	2.71899e-05
GMIP	0.393665	-0.113901	4.95154	3.80539e-06	3.15012e-05	3.67842	GMIP	59	4.98547	3.28396e-06	2.73316e-05
LAPTM5	0.747291	-0.0408346	4.96776	3.56808e-06	2.96162e-05	3.74073	LAPTM5	9	4.98308	3.3153e-06	2.75738e-05
BCL2L13	0.246121	0.144929	4.93404	4.07876e-06	3.34063e-05	3.61131	BCL2L13	50	4.98095	3.34356e-06	2.77901e-05
NUDC	-0.250291	-0.0599249	-4.90087	4.65019e-06	3.77342e-05	3.48451	NUDC	309	-4.98061	3.3482e-06	2.78099e-05
WASHC3	0.195419	0.0576487	5.01789	2.9224e-06	2.48082e-05	3.93397	WASHC3	13	4.97918	3.36734e-06	2.79501e-05
HSBP1	-0.269603	-0.120346	-4.9487	3.84848e-06	3.17598e-05	3.66753	HSBP1	29	-4.97429	3.43357e-06	2.84806e-05
MINDY3	-0.501455	-0.0685694	-4.97003	3.53604e-06	2.93866e-05	3.74946	MINDY3	7	-4.97204	3.46437e-06	2.87091e-05
MED27	-0.154282	0.00119528	-5.02557	2.83422e-06	2.4193e-05	3.96364	MED27	15	-4.97194	3.46578e-06	2.87091e-05
DHX8	-0.13148	-0.0132502	-4.78399	7.35603e-06	5.65983e-05	3.04144	DHX8	136	-4.97038	3.48742e-06	2.8869e-05
NFKBIE	0.263643	0.0417867	5.02171	2.87822e-06	2.44837e-05	3.94872	NFKBIE	7	4.97008	3.49154e-06	2.88837e-05
UBOX5	-0.270792	-0.0263765	-5.02896	2.79609e-06	2.39006e-05	3.97675	UBOX5	6	-4.96916	3.50443e-06	2.89709e-05
DKC1	0.213076	0.0990474	4.87963	5.05643e-06	4.06294e-05	3.40354	DKC1	134	4.96571	3.55284e-06	2.9351e-05
LY86	0.546262	0.0972919	5.00921	3.02541e-06	2.55945e-05	3.90043	LY86	1	4.96555	3.55517e-06	2.9351e-05
CAMK1D	0.550873	-0.0747817	4.94013	3.98142e-06	3.27604e-05	3.63467	CAMK1D	29	4.96301	3.59126e-06	2.96291e-05
OSBPL3	-0.542324	-0.145275	-4.93403	4.0789e-06	3.34063e-05	3.61127	OSBPL3	45	-4.96042	3.62849e-06	2.99163e-05
FECH	-0.461516	0.0583427	-4.93157	4.11874e-06	3.37102e-05	3.60187	FECH	47	-4.96003	3.63409e-06	2.99424e-05
TP53INP2	1.18754	0.50167	5.18715	3.69426e-06	3.06018e-05	4.01388	TP53INP2	1	5.18177	3.64991e-06	3.00526e-05
EXOC1	-0.198019	0.0451053	-4.87003	5.25115e-06	4.19752e-05	3.36702	EXOC1	94	-4.95518	3.70489e-06	3.0485e-05
SMARCA1	-0.741298	-0.0283421	-4.94933	3.83896e-06	3.17231e-05	3.66993	SMARCA1	3	-4.95277	3.74044e-06	3.07569e-05
ADA2	-0.917748	-0.136548	-4.93022	4.14091e-06	3.38243e-05	3.59668	ADA2	20	-4.95124	3.76331e-06	3.09244e-05
DENND1C	-0.743005	-0.0931346	-4.93022	4.14079e-06	3.38243e-05	3.59671	DENND1C	17	-4.94981	3.78478e-06	3.108e-05
EXOSC9	-0.231258	0.0369929	-4.89718	4.71844e-06	3.82125e-05	3.47042	EXOSC9	54	-4.94938	3.79117e-06	3.11118e-05
FSTL1	-1.3683	-0.378807	-5.0181	4.07317e-06	3.34038e-05	3.74191	FSTL1	1	-5.02924	3.83366e-06	3.14396e-05
EEF2K	0.406643	-0.224462	4.91589	4.38236e-06	3.56547e-05	3.54187	EEF2K	47	4.94606	3.84158e-06	3.14836e-05
UVRAG	0.276008	0.09179	4.90853	4.51168e-06	3.66827e-05	3.51375	UVRAG	42	4.94524	3.85414e-06	3.15655e-05
RPS6KB2	-0.24208	0.0575098	-4.94643	3.88336e-06	3.19962e-05	3.6588	RPS6KB2	16	-4.94233	3.89896e-06	3.19114e-05
TRIM37	-0.195361	-0.0164086	-5.00595	3.06499e-06	2.58885e-05	3.88784	TRIM37	10	-4.94063	3.9253e-06	3.21057e-05
C1orf122	-0.29043	-0.145442	-4.99906	3.15028e-06	2.65054e-05	3.86127	C1orf122	5	-4.9383	3.96182e-06	3.23829e-05
IQSEC2	0.739176	-0.053482	4.94863	3.84951e-06	3.17598e-05	3.66727	IQSEC2	1	4.93563	4.00399e-06	3.27059e-05
B4GALT2	1.13822	-0.169011	6.02062	2.67038e-06	2.30015e-05	4.75689	B4GALT2	1	5.81503	4.03023e-06	3.28984e-05
SALL2	-1.08497	0.132604	-4.92032	4.30632e-06	3.51056e-05	3.5588	SALL2	3	-4.93369	4.03486e-06	3.29144e-05
TBC1D4	0.60766	-0.0240716	4.90218	4.62614e-06	3.75885e-05	3.48952	TBC1D4	86	4.93048	4.08668e-06	3.33151e-05
USP3	0.314619	0.0104279	4.89474	4.76395e-06	3.85052e-05	3.46114	USP3	45	4.92931	4.10567e-06	3.3426e-05
CECR2	1.13326	-0.437311	4.91756	4.35341e-06	3.5466e-05	3.54828	CECR2	2	4.92931	4.10571e-06	3.3426e-05
NLRX1	0.470223	0.106117	4.90134	4.64156e-06	3.7689e-05	3.4863	NLRX1	35	4.92644	4.15261e-06	3.37831e-05
ATXN1L	-0.316136	0.137547	-4.93691	4.03259e-06	3.31372e-05	3.62232	ATXN1L	10	-4.92629	4.15506e-06	3.37831e-05
MOB3C	0.545063	0.16115	5.01826	3.39615e-06	2.83995e-05	3.84943	MOB3C	1	4.96157	4.17123e-06	3.38923e-05
ZFP64	0.238021	0.118873	4.92134	4.28891e-06	3.49868e-05	3.56272	ZFP64	18	4.92328	4.205e-06	3.41442e-05
FAM160B1	-0.31312	0.0513066	-4.87509	5.1476e-06	4.13081e-05	3.38627	FAM160B1	72	-4.91809	4.29239e-06	3.48308e-05
IGF2R	-0.36478	0.0523178	-4.86887	5.27504e-06	4.21115e-05	3.36263	IGF2R	257	-4.9162	4.32454e-06	3.50686e-05
ZC3H12A	-0.40678	-0.00495494	-4.91623	4.37652e-06	3.56308e-05	3.54316	ZC3H12A	9	-4.91589	4.33e-06	3.50898e-05
UBTD2	0.273985	0.0297099	4.97073	3.52626e-06	2.93284e-05	3.75214	UBTD2	6	4.91525	4.34094e-06	3.51553e-05
ARF5	-0.194012	0.106617	-4.84268	5.84679e-06	4.60495e-05	3.2632	ARF5	64	-4.91405	4.36162e-06	3.52997e-05
MAP1A	-0.801916	-0.0577909	-4.88592	4.93254e-06	3.9747e-05	3.42752	MAP1A	187	-4.91268	4.38538e-06	3.54686e-05
OXA1L	0.256331	-0.0623346	4.89791	4.70478e-06	3.81269e-05	3.47322	OXA1L	22	4.91188	4.39928e-06	3.5552e-05
TBC1D1	0.397502	-0.0186001	4.87472	5.1551e-06	4.13414e-05	3.38486	TBC1D1	91	4.91175	4.40146e-06	3.5552e-05
MBLAC2	0.344973	0.0861197	4.88813	4.88975e-06	3.94703e-05	3.43594	MBLAC2	28	4.91123	4.41051e-06	3.5598e-05
SLC15A4	0.628725	-0.0173066	4.89988	4.66847e-06	3.78576e-05	3.48071	SLC15A4	8	4.9111	4.41293e-06	3.5598e-05
RAB37	-1.07811	-0.164261	-4.88778	4.89659e-06	3.94996e-05	3.43459	RAB37	14	-4.90792	4.46874e-06	3.60247e-05
WDR47	0.22149	0.0639812	4.874	5.16966e-06	4.14312e-05	3.38214	WDR47	33	4.90729	4.47985e-06	3.60906e-05
MRM1	0.469188	-0.217264	4.89005	4.85304e-06	3.91996e-05	3.44323	MRM1	14	4.90307	4.55526e-06	3.66742e-05
WDR77	0.148466	0.105801	4.79766	6.97386e-06	5.40288e-05	3.09294	WDR77	63	4.90137	4.58612e-06	3.68985e-05
BOLA3	-0.23709	0.067795	-4.92908	4.15954e-06	3.39539e-05	3.59234	BOLA3	11	-4.90046	4.60259e-06	3.69998e-05
PRMT5	0.172218	0.0750716	4.78342	7.37226e-06	5.66878e-05	3.03931	PRMT5	142	4.90034	4.60471e-06	3.69998e-05
SH3GL3	-1.48128	-0.306611	-4.96759	5.05013e-06	4.06053e-05	3.54051	SH3GL3	2	-4.9857	4.63228e-06	3.7197e-05
URGCP	-0.355688	-0.0370902	-4.8776	5.09703e-06	4.0929e-05	3.39581	URGCP	25	-4.89816	4.64472e-06	3.72727e-05
CREBBP	0.389114	0.0154727	4.86439	5.36892e-06	4.28332e-05	3.34558	CREBBP	58	4.89738	4.65898e-06	3.73628e-05
EAF2	0.418001	-0.180501	4.94926	3.83992e-06	3.17231e-05	3.66968	EAF2	2	4.89642	4.67661e-06	3.74798e-05
TUSC2	-0.361367	-0.158112	-4.94732	3.86966e-06	3.19047e-05	3.66222	TUSC2	3	-4.89246	4.75051e-06	3.80473e-05
HEATR5B	0.211184	-0.0206991	4.82277	6.32151e-06	4.95956e-05	3.18778	HEATR5B	77	4.89212	4.75687e-06	3.80735e-05
GDAP2	-0.275645	0.0646457	-4.87116	5.22774e-06	4.18357e-05	3.37134	GDAP2	23	-4.88785	4.83779e-06	3.86961e-05
CHI3L2	-1.20275	-0.249586	-4.86983	5.25531e-06	4.19812e-05	3.36625	CHI3L2	5	-4.88697	4.85464e-06	3.88056e-05
RPS6KA4	0.411425	-0.0284718	4.86092	5.44267e-06	4.33095e-05	3.3324	RPS6KA4	33	4.88592	4.87483e-06	3.89418e-05
SNTB1	0.753321	-0.119005	4.86385	5.38038e-06	4.28968e-05	3.34352	SNTB1	25	4.88528	4.88709e-06	3.90144e-05
LRWD1	-0.190111	0.0296316	-4.82238	6.33112e-06	4.96105e-05	3.18632	LRWD1	52	-4.88506	4.8913e-06	3.90228e-05
CEP97	-0.225702	0.0354335	-4.82124	6.35946e-06	4.9801e-05	3.182	CEP97	70	-4.88169	4.95693e-06	3.95208e-05
CYSTM1	-0.710831	-0.000538241	-4.89545	4.75062e-06	3.84479e-05	3.46385	CYSTM1	1	-4.88059	4.9784e-06	3.96663e-05
ZNF114	0.804602	-0.611693	4.88571	4.93664e-06	3.9747e-05	3.42672	ZNF114	1	4.87896	5.01051e-06	3.98963e-05
SSX2IP	-0.483552	-0.285162	-4.86298	5.39886e-06	4.30164e-05	3.34021	SSX2IP	11	-4.87285	5.13284e-06	4.0844e-05
KANSL3	-0.18879	0.0285341	-4.81343	6.55698e-06	5.10558e-05	3.15246	KANSL3	48	-4.87223	5.14536e-06	4.09173e-05
MLLT11	-0.589914	-0.201947	-4.85087	5.662e-06	4.48233e-05	3.29422	MLLT11	24	-4.87176	5.15499e-06	4.09674e-05
NADK2	0.46166	0.0469555	4.84312	5.83674e-06	4.60292e-05	3.26486	NADK2	50	4.87139	5.16249e-06	4.10005e-05
ISOC2	0.349637	0.072118	4.83703	5.97789e-06	4.7022e-05	3.24177	ISOC2	42	4.86743	5.2437e-06	4.16187e-05
IL1B	1.07967	-0.297118	4.89743	5.42366e-06	4.31861e-05	3.39637	IL1B	1	4.90194	5.25534e-06	4.16843e-05
IQCB1	0.395085	0.0673748	4.84427	5.81056e-06	4.58521e-05	3.2692	IQCB1	27	4.86624	5.26842e-06	4.17611e-05
TPRN	0.408975	-0.218939	4.85182	5.64092e-06	4.47426e-05	3.29783	TPRN	17	4.86589	5.2755e-06	4.17904e-05
SCD5	-0.539115	0.106014	-4.84662	5.75707e-06	4.55174e-05	3.27813	SCD5	18	-4.8645	5.30454e-06	4.19706e-05
PAPOLG	-0.243697	-0.0726887	-4.82262	6.32519e-06	4.95956e-05	3.18722	PAPOLG	45	-4.86448	5.30507e-06	4.19706e-05
MED22	-0.142148	0.0420523	-4.81294	6.56956e-06	5.11215e-05	3.15061	MED22	33	-4.86153	5.36701e-06	4.24335e-05
CENPP	-0.320852	0.00417052	-4.8857	4.93694e-06	3.9747e-05	3.42666	CENPP	7	-4.8611	5.37619e-06	4.24788e-05
JAK1	0.315473	0.0720127	4.8166	6.4761e-06	5.04579e-05	3.16445	JAK1	78	4.85945	5.41112e-06	4.27274e-05
NRP2	1.00658	0.0186341	4.88978	5.58581e-06	4.43626e-05	3.36789	NRP2	1	4.89142	5.47324e-06	4.31902e-05
TEAD4	1.06027	-0.215728	4.94575	5.6176e-06	4.45863e-05	3.44443	TEAD4	1	4.94624	5.50517e-06	4.34144e-05
SNX10	-0.946922	-0.627123	-4.84607	5.7695e-06	4.55865e-05	3.27605	SNX10	2	-4.85373	5.53431e-06	4.36163e-05
SLC22A16	1.06584	-0.221367	4.98822	5.66045e-06	4.48233e-05	3.5088	SLC22A16	1	4.98427	5.61733e-06	4.42423e-05
BCAR3	1.07431	-0.511994	4.87996	5.80105e-06	4.58063e-05	3.33133	BCAR3	1	4.8844	5.62361e-06	4.42635e-05
USP1	-0.33774	-0.0618505	-4.81863	6.42469e-06	5.01842e-05	3.17215	USP1	41	-4.84905	5.63723e-06	4.43423e-05
MYO10	0.948084	-0.746696	4.83013	6.14184e-06	4.825e-05	3.21564	MYO10	8	4.84719	5.67871e-06	4.46401e-05
MB21D2	-1.24573	-0.555912	-4.8702	6.13824e-06	4.825e-05	3.28258	MB21D2	1	-4.8797	5.83513e-06	4.58405e-05
CTSV	-0.799663	0.253249	-4.88423	5.70646e-06	4.51462e-05	3.34722	CTSV	1	-4.87297	5.87715e-06	4.61412e-05
SPINT2	-0.681259	0.0826431	-4.84294	5.84093e-06	4.60328e-05	3.26416	SPINT2	2	-4.83773	5.89377e-06	4.62423e-05
TBCCD1	-0.305515	0.037862	-5.01865	2.91362e-06	2.47678e-05	3.93688	TBCCD1	1	-4.83757	5.89755e-06	4.62425e-05
GPA33	-1.16425	-0.991062	-4.82108	6.3635e-06	4.9801e-05	3.18139	GPA33	2	-4.83348	5.99307e-06	4.69616e-05
MGST3	0.464944	-0.0679714	4.81044	6.63397e-06	5.15901e-05	3.14119	MGST3	29	4.83299	6.00473e-06	4.70231e-05
ATG10	-0.527437	0.212424	-4.87347	5.18041e-06	4.14904e-05	3.38013	ATG10	1	-4.83003	6.07485e-06	4.7542e-05
GCHFR	0.784536	-0.0887187	4.80892	6.67359e-06	5.18655e-05	3.13544	GCHFR	17	4.82837	6.11461e-06	4.78227e-05
NCKAP1L	0.309122	0.121864	4.77543	7.60566e-06	5.82643e-05	3.00922	NCKAP1L	154	4.82643	6.16127e-06	4.81571e-05
SPNS3	-0.994245	-0.241914	-4.82071	6.37275e-06	4.98417e-05	3.17999	SPNS3	1	-4.8242	6.21549e-06	4.85501e-05
PIP4P1	0.284643	0.119321	4.85127	5.65295e-06	4.48092e-05	3.29577	PIP4P1	8	4.82314	6.24132e-06	4.8721e-05
PNKD	-0.219125	-0.0229267	-4.81685	6.46968e-06	5.04397e-05	3.16541	PNKD	20	-4.82253	6.25626e-06	4.88067e-05
ALYREF	-0.176927	-0.0232385	-4.7063	9.94724e-06	7.37752e-05	2.75029	ALYREF	199	-4.82237	6.26026e-06	4.88071e-05
SLC66A2	0.539651	0.110277	4.85728	5.5211e-06	4.39052e-05	3.31857	SLC66A2	1	4.81724	6.38761e-06	4.97684e-05
DENND4A	0.444426	-0.0744509	4.78539	7.31597e-06	5.63956e-05	3.04671	DENND4A	64	4.81578	6.42428e-06	5.00225e-05
RAPGEF1	0.346192	-0.00511597	4.78853	7.22703e-06	5.57449e-05	3.05852	RAPGEF1	32	4.81377	6.47501e-06	5.03857e-05
ACACB	-0.61103	-0.242251	-4.82462	6.27598e-06	4.92724e-05	3.19477	ACACB	2	-4.81325	6.48821e-06	5.04566e-05
ARID3B	-0.892313	-0.372114	-4.79082	7.16259e-06	5.53171e-05	3.06716	ARID3B	19	-4.81107	6.54394e-06	5.08579e-05
STARD13	1.05177	-0.137383	4.80525	6.77011e-06	5.25163e-05	3.12157	STARD13	1	4.81073	6.55261e-06	5.08758e-05
SUSD3	1.01096	-1.02534	4.80649	6.73734e-06	5.2328e-05	3.12626	SUSD3	1	4.81066	6.5545e-06	5.08758e-05
ZNF485	0.358483	0.0904416	4.93064	4.13397e-06	3.38124e-05	3.5983	ZNF485	1	4.80994	6.57292e-06	5.09867e-05
CUL9	-0.28216	0.0507743	-4.78503	7.32617e-06	5.6439e-05	3.04536	CUL9	25	-4.80458	6.71248e-06	5.20365e-05
TAPT1	0.494158	-0.147569	4.77882	7.50585e-06	5.76431e-05	3.02197	TAPT1	39	4.80379	6.73325e-06	5.21647e-05
APBB1	-1.15897	0.0156709	-4.82997	7.02815e-06	5.43363e-05	3.14587	APBB1	1	-4.83742	6.73832e-06	5.21712e-05
AGK	-0.387768	0.0496503	-4.77135	7.72759e-06	5.90752e-05	2.99387	AGK	55	-4.80277	6.76019e-06	5.23077e-05
SHPRH	-0.260572	-0.00303	-4.75214	8.3274e-06	6.33211e-05	2.92173	SHPRH	70	-4.80122	6.80125e-06	5.25924e-05
AAGAB	-0.264611	-0.169018	-4.80555	6.76207e-06	5.2487e-05	3.12272	AAGAB	14	-4.80091	6.80959e-06	5.26126e-05
BDH1	0.441316	0.060127	4.77389	7.65154e-06	5.85794e-05	3.00342	BDH1	43	4.80073	6.81432e-06	5.26126e-05
CCNC	-0.228647	0.0740757	-4.85555	5.55882e-06	4.41767e-05	3.31199	CCNC	8	-4.80051	6.82013e-06	5.26126e-05
HLA-DRB1	0.691579	-0.327338	4.7772	7.55325e-06	5.79151e-05	3.0159	HLA-DRB1	40	4.80048	6.82094e-06	5.26126e-05
CTBP2	0.619113	0.00364319	4.77713	7.55536e-06	5.79151e-05	3.01563	CTBP2	34	4.80001	6.8337e-06	5.2678e-05
GAPVD1	0.191175	-0.0278674	4.70015	1.01868e-05	7.51871e-05	2.72734	GAPVD1	170	4.79851	6.87371e-06	5.29534e-05
PRKCSH	-0.193354	0.0694309	-4.69122	1.05444e-05	7.75016e-05	2.69408	PRKCSH	311	-4.79811	6.88454e-06	5.30037e-05
CCDC15	-0.334991	0.0672746	-4.81731	6.45805e-06	5.04129e-05	3.16715	CCDC15	7	-4.79794	6.88923e-06	5.30066e-05
TRMT13	0.210122	-0.0103184	4.80365	6.81256e-06	5.28124e-05	3.11554	TRMT13	17	4.79743	6.90284e-06	5.30782e-05
PTER	0.382149	0.132583	4.76544	7.90757e-06	6.03148e-05	2.97165	PTER	53	4.79666	6.92381e-06	5.32063e-05
NUDT3	0.232989	0.0408077	4.81712	6.46281e-06	5.04181e-05	3.16643	NUDT3	12	4.79534	6.95961e-06	5.34481e-05
TBC1D13	0.257399	0.00232634	4.74939	8.41677e-06	6.39218e-05	2.91143	TBC1D13	59	4.79511	6.96592e-06	5.34632e-05
DPH3	-0.510603	0.0951457	-4.81999	6.39073e-06	4.99506e-05	3.17727	DPH3	2	-4.79473	6.97621e-06	5.34953e-05
AASS	0.868884	-0.214836	4.77125	7.73068e-06	5.90752e-05	2.99349	AASS	57	4.79462	6.97917e-06	5.34953e-05
SORBS1	0.958627	0.194236	4.77313	7.67423e-06	5.87166e-05	3.00056	SORBS1	27	4.79448	6.98312e-06	5.34953e-05
RBM34	0.189092	-0.0113671	4.7151	9.61448e-06	7.16494e-05	2.7831	RBM34	80	4.79351	7.00974e-06	5.36659e-05
GAPDH	-0.227979	0.0422208	-4.70109	1.01499e-05	7.50497e-05	2.73084	GAPDH	1060	-4.79145	7.06646e-06	5.40666e-05
ZNF787	0.314357	0.0953743	4.78939	7.20262e-06	5.55914e-05	3.06178	ZNF787	13	4.78998	7.10701e-06	5.43431e-05
HSPA2	0.68928	0.240835	4.76817	7.82385e-06	5.97502e-05	2.98192	HSPA2	19	4.78758	7.17401e-06	5.48213e-05
NDST3	-1.01186	-0.566948	-4.81823	7.35101e-06	5.65949e-05	3.10248	NDST3	1	-4.82071	7.18468e-06	5.48689e-05
FAM177A1	-0.310173	-0.0779699	-4.79556	7.03118e-06	5.43363e-05	3.08504	FAM177A1	10	-4.78587	7.22215e-06	5.51209e-05
MORC3	-0.261279	0.0857258	-4.72233	9.34864e-06	6.9922e-05	2.81014	MORC3	111	-4.77909	7.41615e-06	5.65665e-05
GPATCH11	0.237949	0.0154554	4.75465	8.24639e-06	6.27438e-05	2.93117	GPATCH11	28	4.77836	7.43714e-06	5.66915e-05
FAM117A	-0.446904	0.120388	-4.76676	7.8669e-06	6.00417e-05	2.97663	FAM117A	12	-4.77652	7.491e-06	5.70668e-05
NUDT2	-0.307139	0.0388838	-4.75897	8.10916e-06	6.17759e-05	2.94736	NUDT2	19	-4.77091	7.65665e-06	5.82927e-05
YWHAG	0.208201	0.136978	4.68051	1.09894e-05	8.04368e-05	2.65423	YWHAG	203	4.76867	7.72386e-06	5.87681e-05
MAP4K5	-0.300339	-0.0903845	-4.74018	8.72332e-06	6.60464e-05	2.87692	MAP4K5	35	-4.76851	7.7287e-06	5.87686e-05
CD47	-0.433177	0.0365194	-4.74358	8.60883e-06	6.52598e-05	2.88967	CD47	32	-4.76716	7.76974e-06	5.90443e-05
GGNBP2	-0.162659	-0.00854523	-4.73593	8.86865e-06	6.68593e-05	2.86098	GGNBP2	28	-4.76235	7.91686e-06	6.01058e-05
PYCR1	0.613085	-0.194064	4.73941	8.74961e-06	6.62049e-05	2.87402	PYCR1	35	4.76227	7.91918e-06	6.01058e-05
CAMK2A	0.988085	-0.0011167	4.79279	8.10143e-06	6.17552e-05	3.00859	CAMK2A	1	4.79446	7.94454e-06	6.02611e-05
PITX2	-1.83411	-0.179402	-6.34588	7.0046e-06	5.42002e-05	3.99545	PITX2	1	-6.18126	7.98754e-06	6.05501e-05
PIK3CB	-0.307719	0.0535407	-4.72902	9.10934e-06	6.85063e-05	2.83515	PIK3CB	38	-4.75871	8.0299e-06	6.08338e-05
MAP2K7	-0.181603	0.0884929	-4.72978	9.08277e-06	6.83481e-05	2.83797	MAP2K7	29	-4.75764	8.0636e-06	6.10516e-05
SNX29	0.337598	0.0644705	4.72817	9.13964e-06	6.86922e-05	2.83195	SNX29	34	4.75436	8.16726e-06	6.17827e-05
HTATIP2	0.739105	-0.0163705	4.73322	8.96212e-06	6.75227e-05	2.85087	HTATIP2	26	4.75427	8.17019e-06	6.17827e-05
GRK5	-0.778272	-0.145314	-4.73856	8.77856e-06	6.63018e-05	2.87083	GRK5	7	-4.75242	8.22928e-06	6.21913e-05
VPS26B	-0.520832	0.0655565	-4.72268	9.33608e-06	6.98704e-05	2.81144	VPS26B	62	-4.74989	8.31055e-06	6.2767e-05
USP28	0.381297	0.0397906	4.71426	9.64577e-06	7.18392e-05	2.77996	USP28	84	4.74963	8.3189e-06	6.27917e-05
CRY1	-0.343024	-0.0331282	-4.75638	8.19129e-06	6.23631e-05	2.93764	CRY1	9	-4.74929	8.32997e-06	6.2805e-05
PHYHD1	0.878562	0.0241522	4.75012	8.3931e-06	6.37813e-05	2.91415	PHYHD1	1	4.74926	8.33086e-06	6.2805e-05
SNAP29	-0.153632	0.0419843	-4.66512	1.16613e-05	8.46858e-05	2.59704	SNAP29	56	-4.74851	8.35526e-06	6.29505e-05
AASDHPPT	-0.22241	0.0320727	-4.69509	1.03881e-05	7.64897e-05	2.70848	AASDHPPT	57	-4.74674	8.41316e-06	6.3348e-05
EIF4EBP2	-0.166282	-0.0368466	-4.73803	8.79661e-06	6.63974e-05	2.86885	EIF4EBP2	23	-4.74643	8.42322e-06	6.3385e-05
CARD6	0.757852	0.11608	4.77543	8.65582e-06	6.55757e-05	2.94468	CARD6	2	4.77348	8.6078e-06	6.47344e-05
LEMD2	-0.208789	0.105635	-4.70111	1.01491e-05	7.50497e-05	2.73091	LEMD2	38	-4.74047	8.62102e-06	6.47857e-05
RP9	-0.22791	-0.0182905	-4.74883	8.43514e-06	6.40219e-05	2.90933	RP9	15	-4.74022	8.62938e-06	6.47857e-05
GEN1	0.271516	-0.052366	4.72386	9.29357e-06	6.96368e-05	2.81584	GEN1	23	4.74019	8.63038e-06	6.47857e-05
MED14	-0.170028	0.120245	-4.65345	1.21968e-05	8.80411e-05	2.55378	MED14	70	-4.73639	8.75888e-06	6.57103e-05
STX10	-0.188178	-0.0336396	-4.73865	8.77522e-06	6.63018e-05	2.8712	STX10	19	-4.73549	8.78944e-06	6.58994e-05
CIT	-0.274627	-0.0928587	-4.67791	1.11002e-05	8.10289e-05	2.64456	CIT	168	-4.73516	8.80069e-06	6.59437e-05
GTF3A	-0.402023	0.0895751	-4.71737	9.53025e-06	7.11507e-05	2.79158	GTF3A	20	-4.73399	8.84105e-06	6.62058e-05
JAK2	0.527273	0.0324779	4.71756	9.52314e-06	7.11407e-05	2.7923	JAK2	16	4.73379	8.84777e-06	6.62159e-05
CAT	0.397677	-0.0387945	4.69393	1.04346e-05	7.67865e-05	2.70417	CAT	211	4.73336	8.86279e-06	6.62881e-05
ANKRD36C	-0.402833	-0.102431	-4.87273	5.96462e-06	4.69475e-05	3.30445	ANKRD36C	1	-4.76259	8.97286e-06	6.70707e-05
EIF4G2	-0.170974	0.00526571	-4.6087	1.44819e-05	0.000102178	2.38838	EIF4G2	248	-4.72985	8.98435e-06	6.71158e-05
TMEM11	0.218375	0.133955	4.77815	7.52546e-06	5.77577e-05	3.01946	TMEM11	9	4.72959	8.99352e-06	6.71436e-05
ERMP1	0.548705	0.00586477	4.70873	9.85431e-06	7.31712e-05	2.75934	ERMP1	23	4.72859	9.02858e-06	6.73646e-05
SH3BP5	-0.487964	-0.0936163	-4.73625	8.85742e-06	6.68155e-05	2.8622	SH3BP5	4	-4.7269	9.08793e-06	6.77664e-05
PTPRCAP	-0.674742	-0.40155	-4.72416	9.28262e-06	6.9597e-05	2.81698	PTPRCAP	3	-4.72569	9.13066e-06	6.80076e-05
ITGA1	-1.18092	0.0272545	-4.84658	9.45344e-06	7.06629e-05	3.01262	ITGA1	1	-4.85058	9.13131e-06	6.80076e-05
CPM	0.956432	-0.0987999	4.70932	9.83175e-06	7.30477e-05	2.76155	CPM	5	4.72378	9.19869e-06	6.8468e-05
LHFPL2	0.888101	-0.214837	4.72318	9.31814e-06	6.97785e-05	2.81329	LHFPL2	1	4.72304	9.22529e-06	6.86246e-05
NDN	-1.02327	-0.536068	-4.71534	9.60549e-06	7.16257e-05	2.784	NDN	1	-4.72045	9.31845e-06	6.92424e-05
CHST12	-0.598918	-0.038941	-4.70629	9.94762e-06	7.37752e-05	2.75025	CHST12	11	-4.7203	9.32399e-06	6.92424e-05
DAP	0.282483	0.163059	4.70503	9.99639e-06	7.40923e-05	2.74554	DAP	22	4.72026	9.3252e-06	6.92424e-05
TRIP13	-0.383549	-0.0799062	-4.6877	1.06887e-05	7.83286e-05	2.68098	TRIP13	59	-4.71919	9.36398e-06	6.94885e-05
BZW1	-0.186105	-0.0439732	-4.62567	1.35699e-05	9.65165e-05	2.45102	BZW1	136	-4.71877	9.37937e-06	6.95514e-05
MICALL2	-0.498195	0.218241	-4.8129	7.50244e-06	5.76431e-05	3.08278	MICALL2	1	-4.75085	9.38373e-06	6.95514e-05
FGD2	0.904761	-0.564707	4.70254	1.00933e-05	7.47428e-05	2.73623	FGD2	4	4.71478	9.52584e-06	7.05622e-05
ZNF574	0.282894	0.0581006	4.71212	9.72578e-06	7.23476e-05	2.772	ZNF574	15	4.71419	9.54768e-06	7.06815e-05
ICAM1	0.750396	-0.36232	4.69341	1.04555e-05	7.68944e-05	2.70224	ICAM1	19	4.71286	9.59704e-06	7.09645e-05
TIPRL	-0.187534	0.0637433	-4.63463	1.31118e-05	9.36906e-05	2.48409	TIPRL	85	-4.71285	9.59742e-06	7.09645e-05
ZNF512B	-0.611655	-0.111079	-4.68969	1.06071e-05	7.78695e-05	2.68837	ZNF512B	33	-4.71195	9.63067e-06	7.11431e-05
ERGIC2	-0.212757	-0.0454281	-4.72444	9.27271e-06	6.95651e-05	2.81801	ERGIC2	15	-4.71189	9.63312e-06	7.11431e-05
PRR14L	0.188361	0.0205068	4.64308	1.26931e-05	9.12274e-05	2.51536	PRR14L	65	4.71094	9.66859e-06	7.13623e-05
C1GALT1	-0.410733	-0.246558	-4.70246	1.00963e-05	7.47428e-05	2.73595	C1GALT1	12	-4.71036	9.69024e-06	7.14793e-05
NCKAP1	-1.02064	-0.434878	-4.69064	1.05682e-05	7.76305e-05	2.6919	NCKAP1	15	-4.71012	9.69943e-06	7.15043e-05
PAQR7	0.663543	0.16875	4.72552	9.2339e-06	6.93584e-05	2.82205	PAQR7	1	4.70875	9.75117e-06	7.18428e-05
HHEX	0.856573	-0.00478844	4.69811	1.02677e-05	7.56934e-05	2.71972	HHEX	3	4.70711	9.81338e-06	7.22561e-05
CHD6	-0.249153	0.0972766	-4.65085	1.23197e-05	8.88026e-05	2.54412	CHD6	98	-4.70696	9.819e-06	7.22561e-05
NAA40	-0.22001	0.000678158	-4.69733	1.02984e-05	7.58742e-05	2.71684	NAA40	21	-4.70638	9.84126e-06	7.23403e-05
FRYL	-0.252762	-0.0447107	-4.64327	1.26837e-05	9.12133e-05	2.51607	FRYL	172	-4.70635	9.84218e-06	7.23403e-05
KIAA0100	0.215981	0.0361415	4.66885	1.1495e-05	8.35916e-05	2.61088	KIAA0100	36	4.7042	9.92449e-06	7.29018e-05
BICD1	-0.305307	0.0224292	-4.67456	1.12446e-05	8.19639e-05	2.63211	BICD1	38	-4.70384	9.93832e-06	7.29599e-05
OSBPL2	-0.267918	0.0841696	-4.71327	9.68278e-06	7.20712e-05	2.77627	OSBPL2	12	-4.70353	9.95046e-06	7.30056e-05
NR3C1	0.622759	-0.0172197	4.67784	1.11032e-05	8.10289e-05	2.64431	NR3C1	57	4.70255	9.9881e-06	7.32381e-05
TMCO6	-0.335667	0.0790513	-4.73111	9.03592e-06	6.80371e-05	2.84296	TMCO6	5	-4.69907	1.01238e-05	7.41799e-05
ZNF768	0.54593	0.0992742	4.68879	1.06438e-05	7.80924e-05	2.68504	ZNF768	9	4.69895	1.01286e-05	7.41799e-05
ANXA4	0.597029	-0.132279	4.66953	1.14648e-05	8.34209e-05	2.61342	ANXA4	203	4.69834	1.01526e-05	7.43118e-05
CCPG1	0.532105	-0.132806	4.7005	1.01732e-05	7.5135e-05	2.72863	CCPG1	4	4.69637	1.02303e-05	7.48361e-05
GCSAM	0.459399	-0.107787	4.68157	1.09448e-05	8.01582e-05	2.65815	GCSAM	15	4.69538	1.02696e-05	7.50606e-05
SIGLEC10	1.09713	-0.543814	4.7208	1.06521e-05	7.81069e-05	2.7444	SIGLEC10	1	4.72704	1.02732e-05	7.50606e-05
ATP2B2	0.564101	0.119634	4.72495	9.25439e-06	6.94699e-05	2.81991	ATP2B2	1	4.69391	1.03282e-05	7.54175e-05
PRAF2	-0.718618	-0.250376	-4.67948	1.10334e-05	8.06629e-05	2.65038	PRAF2	7	-4.69213	1.03994e-05	7.58925e-05
DCAF6	0.226265	0.0593302	4.66369	1.17254e-05	8.49661e-05	2.59176	DCAF6	31	4.69156	1.04222e-05	7.60145e-05
PAN2	0.225082	0.111179	4.6433	1.26824e-05	9.12133e-05	2.51617	PAN2	48	4.68749	1.05877e-05	7.71755e-05
PLXNB1	0.461617	0.0804168	4.67909	1.10501e-05	8.07369e-05	2.64893	PLXNB1	10	4.68685	1.0614e-05	7.73213e-05
ANAPC4	-0.172828	-0.0241805	-4.63917	1.28848e-05	9.22827e-05	2.50091	ANAPC4	37	-4.68399	1.07321e-05	7.8134e-05
DENND4B	0.342512	0.169566	4.66417	1.1704e-05	8.49109e-05	2.59352	DENND4B	25	4.68384	1.07382e-05	7.8134e-05
IMPAD1	-0.252899	-0.0233795	-4.65568	1.20927e-05	8.74222e-05	2.56204	IMPAD1	31	-4.68207	1.08119e-05	7.8624e-05
SRGAP3	-0.877391	-0.236652	-4.66379	1.17209e-05	8.49661e-05	2.59212	SRGAP3	7	-4.67913	1.09354e-05	7.94754e-05
SLC30A7	-0.303797	0.0755272	-4.71074	9.77802e-06	7.26923e-05	2.76683	SLC30A7	6	-4.67766	1.09981e-05	7.98714e-05
MED6	-0.160939	0.107413	-4.70049	1.01736e-05	7.5135e-05	2.72859	MED6	17	-4.67754	1.10029e-05	7.98714e-05
CASD1	-0.2927	0.0237654	-4.73884	8.76895e-06	6.63018e-05	2.87189	CASD1	4	-4.67655	1.10454e-05	8.01329e-05
DACT1	0.972629	-0.228719	4.7593	1.12012e-05	8.16956e-05	2.77718	DACT1	1	4.75712	1.11087e-05	8.05044e-05
EML3	0.285334	0.105818	4.64485	1.26068e-05	9.07662e-05	2.52192	EML3	38	4.67504	1.11097e-05	8.05044e-05
GBE1	0.454397	0.15619	4.64095	1.27972e-05	9.17616e-05	2.50749	GBE1	175	4.67469	1.1125e-05	8.05681e-05
SNX15	-0.276615	0.0979705	-4.66501	1.16661e-05	8.46858e-05	2.59664	SNX15	17	-4.67116	1.12777e-05	8.1626e-05
AMFR	-0.256535	-0.170685	-4.65214	1.22587e-05	8.84144e-05	2.5489	AMFR	24	-4.6694	1.13546e-05	8.21345e-05
GPBP1L1	-0.229546	0.0448342	-4.71635	9.56799e-06	7.13892e-05	2.78777	GPBP1L1	8	-4.66755	1.14359e-05	8.26741e-05
ATPAF2	0.235104	0.125855	4.67205	1.13538e-05	8.27113e-05	2.62279	ATPAF2	15	4.66621	1.14952e-05	8.30537e-05
EIPR1	0.256872	0.0665913	4.63815	1.29356e-05	9.25386e-05	2.49713	EIPR1	30	4.66316	1.16314e-05	8.39883e-05
MALT1	0.45436	-0.0235683	4.63292	1.31979e-05	9.4251e-05	2.47779	MALT1	71	4.66213	1.16775e-05	8.4258e-05
USP13	0.288584	-0.0489574	4.62011	1.38626e-05	9.8258e-05	2.43047	USP13	72	4.66202	1.16824e-05	8.4258e-05
NFX1	0.231237	0.0627461	4.60692	1.45806e-05	0.000102522	2.38184	NFX1	70	4.65979	1.17835e-05	8.49373e-05
PPP1R9B	0.326646	0.0378641	4.62195	1.37652e-05	9.76237e-05	2.43726	PPP1R9B	63	4.65746	1.18897e-05	8.56528e-05
TTC8	-0.756386	0.162458	-5.86192	3.99247e-06	3.28293e-05	4.36418	TTC8	1	-5.3992	1.18988e-05	8.56685e-05
USP51	-0.874351	-0.0321903	-4.73331	1.18098e-05	8.55271e-05	2.71255	USP51	1	-4.7256	1.19677e-05	8.61145e-05
CD4	-1.26907	-0.669649	-4.64057	1.28158e-05	9.18417e-05	2.50609	CD4	2	-4.65444	1.2029e-05	8.65051e-05
GSTCD	-0.217767	0.110003	-4.61763	1.3995e-05	9.90821e-05	2.42132	GSTCD	38	-4.65423	1.20384e-05	8.65221e-05
WRN	-0.281115	-0.0979827	-4.60889	1.44712e-05	0.00010216	2.3891	WRN	82	-4.65383	1.20571e-05	8.66062e-05
SFXN3	0.561136	0.190797	4.63178	1.32558e-05	9.45005e-05	2.47357	SFXN3	25	4.65203	1.21411e-05	8.71586e-05
TP53I11	0.422764	0.0252438	4.6426	1.27165e-05	9.13427e-05	2.51358	TP53I11	11	4.64986	1.2243e-05	8.7815e-05
KDSR	0.344703	0.167697	4.63022	1.33355e-05	9.50135e-05	2.4678	KDSR	25	4.64978	1.22468e-05	8.7815e-05
USP39	-0.138895	0.0920014	-4.50866	2.11915e-05	0.000142502	2.02214	USP39	127	-4.64813	1.23251e-05	8.83059e-05
PLOD1	0.485519	-0.0897057	4.62378	1.36687e-05	9.69952e-05	2.44403	PLOD1	40	4.64803	1.23296e-05	8.83059e-05
TARBP2	-0.212523	0.00516572	-4.67987	1.10168e-05	8.05893e-05	2.65183	TARBP2	11	-4.64694	1.23817e-05	8.86273e-05
LYL1	0.873432	-0.000655066	4.63849	1.29188e-05	9.24725e-05	2.49837	LYL1	2	4.6448	1.2484e-05	8.93084e-05
CCDC167	-0.29642	-0.131923	-4.63554	1.30658e-05	9.34162e-05	2.48748	CCDC167	15	-4.63977	1.2728e-05	9.09715e-05
TPM1	-0.288639	0.0254947	-4.60147	1.4888e-05	0.000104445	2.36176	TPM1	59	-4.6397	1.27313e-05	9.09715e-05
RFC2	-0.14874	0.00846019	-4.52505	1.99163e-05	0.00013481	2.08181	RFC2	94	-4.63635	1.28965e-05	9.20987e-05
CCR9	-1.07473	-0.0299636	-4.69879	1.34121e-05	9.55041e-05	2.58978	CCR9	1	-4.70274	1.30226e-05	9.29451e-05
NINJ2	-0.886196	-0.998762	-4.63273	1.32075e-05	9.42649e-05	2.47709	NINJ2	1	-4.63329	1.30491e-05	9.30802e-05
SIRT3	0.412889	0.269745	4.62549	1.35797e-05	9.65303e-05	2.45032	SIRT3	11	4.63218	1.3105e-05	9.34011e-05
RAB6B	-1.68862	0.347611	-5.38322	1.36013e-05	9.66278e-05	3.18845	RAB6B	1	-5.3622	1.31092e-05	9.34011e-05
TRDC	-1.74963	0.748975	-5.04229	1.49732e-05	0.000104983	2.90135	TRDC	2	-5.06889	1.31184e-05	9.34129e-05
PTPRS	-0.955524	0.256965	-4.61788	1.39815e-05	9.90439e-05	2.42224	PTPRS	4	-4.63106	1.31616e-05	9.36662e-05
GBP4	0.758177	-0.219121	4.60801	1.45202e-05	0.000102272	2.38584	GBP4	51	4.63074	1.31776e-05	9.36744e-05
ARHGAP18	0.69202	-0.271744	4.60832	1.45027e-05	0.000102209	2.38701	ARHGAP18	41	4.63074	1.3178e-05	9.36744e-05
ABHD17C	0.566755	-0.0179234	4.65888	1.19448e-05	8.64036e-05	2.57389	ABHD17C	1	4.63014	1.32083e-05	9.37862e-05
ZCRB1	-0.264997	-0.00155422	-4.65354	1.21925e-05	8.80411e-05	2.55412	ZCRB1	9	-4.63013	1.32089e-05	9.37862e-05
DNTT	1.00774	-0.205582	4.60722	1.4564e-05	0.000102463	2.38294	DNTT	75	4.62955	1.32383e-05	9.39408e-05
GM2A	0.768259	0.119011	4.60731	1.45589e-05	0.000102463	2.38328	GM2A	23	4.62732	1.33523e-05	9.46953e-05
CD99	-0.689458	0.0750234	-4.60279	1.48127e-05	0.000104035	2.36664	CD99	44	-4.62545	1.34486e-05	9.53233e-05
CENPU	-0.303611	-0.052333	-4.59486	1.52688e-05	0.000106691	2.33744	CENPU	41	-4.62493	1.34751e-05	9.54562e-05
SACM1L	-0.257107	0.0678526	-4.57504	1.64688e-05	0.000114751	2.26463	SACM1L	82	-4.624	1.35235e-05	9.57441e-05
NYNRIN	0.561236	-0.151952	4.62432	1.36407e-05	9.68519e-05	2.44601	NYNRIN	4	4.62344	1.35524e-05	9.58935e-05
RPUSD3	0.333088	0.0358545	4.60253	1.48276e-05	0.00010408	2.36567	RPUSD3	24	4.62105	1.36773e-05	9.6722e-05
GNG11	1.09181	-0.383229	4.69432	1.42103e-05	0.000100491	2.5475	GNG11	1	4.6987	1.37673e-05	9.73028e-05
FLYWCH2	-0.351145	0.166884	-4.61503	1.41349e-05	0.000100015	2.41174	FLYWCH2	12	-4.61873	1.37997e-05	9.74756e-05
CDC23	-0.158512	0.0143281	-4.53629	1.90846e-05	0.000130181	2.12282	CDC23	64	-4.6181	1.38334e-05	9.76578e-05
FERMT1	0.938107	-0.335676	4.59827	1.50712e-05	0.00010555	2.34999	FERMT1	12	4.61643	1.39221e-05	9.81778e-05
EEA1	0.307792	-0.0124356	4.568	1.69164e-05	0.00011736	2.23883	EEA1	196	4.61642	1.3923e-05	9.81778e-05
RAD54L	-0.292896	0.0209805	-4.60467	1.47069e-05	0.000103351	2.37354	RAD54L	19	-4.61596	1.39472e-05	9.82926e-05
SLC39A8	-0.363853	-0.0111254	-4.62717	1.34926e-05	9.60216e-05	2.45652	SLC39A8	6	-4.61186	1.41683e-05	9.97932e-05
PLPP1	-0.756963	-0.230031	-4.60832	1.4503e-05	0.000102209	2.38698	PLPP1	2	-4.61012	1.42632e-05	0.000100405
DECR1	0.346801	0.0588369	4.56957	1.68161e-05	0.000116841	2.24455	DECR1	104	4.60767	1.43978e-05	0.000101294
RNF213	-0.414994	-0.00391184	-4.56649	1.70143e-05	0.000117687	2.23328	RNF213	558	-4.60499	1.4547e-05	0.000102285
PLEKHM1	-0.232163	-0.0359189	-4.65917	1.19314e-05	8.63575e-05	2.57497	PLEKHM1	7	-4.60389	1.4608e-05	0.000102656
EPHB3	0.942995	-0.177579	4.59512	1.52537e-05	0.000106646	2.3384	EPHB3	2	4.60361	1.46236e-05	0.000102707
SPECC1L	0.259326	0.0614625	4.74832	8.45182e-06	6.4109e-05	2.90742	SPECC1L	2	4.60281	1.46685e-05	0.000102963
ATP6V1F	-0.199611	0.0960558	-4.57116	1.67141e-05	0.000116329	2.25041	ATP6V1F	31	-4.60011	1.48214e-05	0.000103978
SEMA7A	-1.05685	-0.576164	-4.57887	1.62298e-05	0.000113214	2.2787	SEMA7A	13	-4.59768	1.49595e-05	0.000104887
TRIM35	-0.234745	-0.105662	-4.69954	1.0211e-05	7.53209e-05	2.72505	TRIM35	4	-4.59571	1.50732e-05	0.000105624
ABCB7	0.213996	0.0825126	4.557	1.76401e-05	0.00012147	2.19853	ABCB7	40	4.59525	1.50994e-05	0.000105747
NUP37	-0.105541	0.000506081	-4.44153	2.72918e-05	0.000178178	1.7791	NUP37	64	-4.59487	1.51215e-05	0.000105842
EID2	-0.337127	-0.217715	-4.632	1.32446e-05	9.44754e-05	2.47438	EID2	4	-4.5935	1.52014e-05	0.00010634
SNX32	0.752865	0.20938	4.59939	1.50065e-05	0.000105156	2.35413	SNX32	1	4.59272	1.52469e-05	0.000106598
C8orf88	-0.794579	0.0179575	-4.62816	1.51069e-05	0.00010574	2.40757	C8orf88	1	-4.62049	1.53673e-05	0.00010738
SPHK2	0.217287	0.017029	4.67034	1.14291e-05	8.32107e-05	2.61642	SPHK2	6	4.58971	1.54231e-05	0.000107709
ELOVL1	0.303688	0.0897555	4.64155	1.27677e-05	9.16571e-05	2.50971	ELOVL1	4	4.58922	1.54522e-05	0.00010785
NDUFA4L2	0.615906	-0.178819	4.85727	1.16571e-05	8.46858e-05	2.89233	NDUFA4L2	1	4.76771	1.54856e-05	0.000108022
PSMD13	-0.108763	3.82019e-05	-4.36808	3.5912e-05	0.000223787	1.51574	PSMD13	168	-4.58708	1.55794e-05	0.000108615
FLT3	0.728181	0.0852806	4.56764	1.69398e-05	0.000117376	2.2375	FLT3	19	4.58655	1.56105e-05	0.000108771
LZTS1	-0.83962	-0.279806	-4.56529	1.70922e-05	0.000118026	2.22889	LZTS1	23	-4.58521	1.5691e-05	0.00010927
TBC1D30	0.779739	-0.123661	4.61367	1.59509e-05	0.000111394	2.36162	TBC1D30	2	4.61435	1.57262e-05	0.000109453
CD63	0.619045	-0.18382	4.57052	1.67552e-05	0.000116549	2.24804	CD63	10	4.5841	1.57577e-05	0.000109569
WDSUB1	0.412131	0.108729	4.56681	1.69938e-05	0.000117611	2.23444	WDSUB1	21	4.58405	1.57607e-05	0.000109569
FAM126A	0.420928	0.0360768	4.56937	1.68286e-05	0.000116862	2.24384	FAM126A	17	4.58379	1.57766e-05	0.000109616
ARHGEF26	-1.51888	-0.0595543	-4.85461	1.69194e-05	0.00011736	2.65938	ARHGEF26	1	-4.86537	1.57851e-05	0.000109616
ZBED1	0.365624	-0.0392542	4.56268	1.72632e-05	0.000119008	2.21931	ZBED1	25	4.5821	1.58787e-05	0.000110161
MDM2	0.632328	-0.298116	4.56472	1.71291e-05	0.00011815	2.22681	MDM2	16	4.58205	1.58815e-05	0.000110161
MCFD2	0.271857	0.000504579	4.56707	1.69767e-05	0.000117559	2.23541	MCFD2	22	4.58176	1.58994e-05	0.000110223
TMEM177	0.397112	0.259461	4.613	1.42453e-05	0.000100681	2.40424	TMEM177	3	4.5816	1.59092e-05	0.000110228
COCH	0.650321	-0.373939	4.59593	1.52065e-05	0.000106377	2.34138	COCH	1	4.58017	1.59961e-05	0.000110769
DNAJC24	-0.347975	-0.0547217	-4.64701	1.25027e-05	9.00693e-05	2.52991	DNAJC24	2	-4.5788	1.60802e-05	0.000111288
ZGRF1	-0.259172	-0.0340667	-4.5449	1.84709e-05	0.000126344	2.15426	ZGRF1	40	-4.57727	1.61743e-05	0.000111856
RPS27L	0.354545	-0.0351785	4.56515	1.71016e-05	0.000118026	2.22835	RPS27L	17	4.57713	1.61832e-05	0.000111856
TPX2	-0.301457	-0.081781	-4.52977	1.95626e-05	0.00013278	2.09904	TPX2	158	-4.57683	1.62016e-05	0.000111856
RCAN1	0.664656	-0.193367	4.5653	1.70914e-05	0.000118026	2.22893	RCAN1	7	4.57675	1.62068e-05	0.000111856
RAG2	0.81923	-0.284197	4.56612	1.70385e-05	0.000117788	2.23191	RAG2	4	4.57673	1.62077e-05	0.000111856
SCO1	0.200665	0.0225818	4.57378	1.6548e-05	0.000115238	2.26001	SCO1	19	4.57494	1.6319e-05	0.000112562
SH2D3C	0.43822	0.00275284	4.55373	1.78613e-05	0.000122582	2.18654	SH2D3C	26	4.57385	1.63871e-05	0.000112968
ACOX1	-0.311828	-0.0103661	-4.53553	1.914e-05	0.000130487	2.12003	ACOX1	74	-4.57335	1.64184e-05	0.000113121
NOP16	0.243232	-0.0878691	4.52572	1.98659e-05	0.000134616	2.08424	NOP16	65	4.57192	1.65083e-05	0.000113673
BANK1	0.991723	-0.276231	4.55287	1.79195e-05	0.000122913	2.18341	BANK1	15	4.57178	1.6517e-05	0.000113673
ARID2	-0.250774	0.143643	-4.51535	2.06617e-05	0.000139243	2.04648	ARID2	125	-4.57107	1.65623e-05	0.000113921
C20orf96	-2.19135	-0.520948	-9.5201	4.75408e-06	3.84507e-05	3.76777	C20orf96	1	-7.73776	1.66986e-05	0.000114794
BRAT1	-0.280596	-0.0948285	-4.5307	1.94937e-05	0.000132531	2.10243	BRAT1	56	-4.56786	1.67665e-05	0.000115197
PPIP5K1	0.339148	-0.0261334	4.5464	1.83656e-05	0.000125764	2.15976	PPIP5K1	27	4.56708	1.6816e-05	0.000115473
MFSD14B	-0.335476	-0.167682	-4.64118	1.27858e-05	9.17335e-05	2.50834	MFSD14B	2	-4.56675	1.68372e-05	0.000115495
PJA1	0.494679	-0.2359	4.57928	1.62044e-05	0.000113101	2.28021	PJA1	3	4.56674	1.68379e-05	0.000115495
WT1	-1.17982	-0.167966	-4.55629	1.76882e-05	0.000121734	2.19591	WT1	1	-4.56579	1.68993e-05	0.000115851
SEC23IP	0.210846	-0.0185958	4.49085	2.26671e-05	0.000151106	1.95745	SEC23IP	120	4.55982	1.72883e-05	0.000118453
NUP58	-0.140174	0.047527	-4.50328	2.16269e-05	0.000145045	2.0026	NUP58	38	-4.55945	1.73131e-05	0.000118556
UBE2E1	0.254413	0.0611652	4.61036	1.43898e-05	0.000101644	2.39453	UBE2E1	6	4.55907	1.73383e-05	0.000118651
FAM111B	0.580252	-0.123249	4.5339	1.92584e-05	0.000131221	2.11411	FAM111B	68	4.55887	1.73513e-05	0.000118651
TMEM87B	0.454242	0.145372	4.55482	1.77872e-05	0.000122278	2.19054	TMEM87B	8	4.5588	1.73558e-05	0.000118651
B4GALT7	0.240639	-0.0417843	4.65339	1.21998e-05	8.80411e-05	2.55355	B4GALT7	4	4.55855	1.73721e-05	0.000118697
TRAPPC6A	-0.345607	0.11552	-4.57012	1.67809e-05	0.000116662	2.24657	TRAPPC6A	7	-4.55766	1.74314e-05	0.000118995
CLSPN	-0.339066	-0.1828	-4.52241	2.01161e-05	0.000136012	2.07221	CLSPN	76	-4.55761	1.7435e-05	0.000118995
SMARCD1	-0.276421	-0.00153516	-4.51446	2.07313e-05	0.00013956	2.04325	SMARCD1	64	-4.55429	1.7657e-05	0.000120443
USP34	0.19154	0.143721	4.46879	2.46336e-05	0.000162545	1.87752	USP34	153	4.55274	1.77612e-05	0.000121087
GCH1	-0.795127	-0.441807	-4.55549	1.77417e-05	0.000122034	2.193	GCH1	1	-4.5521	1.78048e-05	0.000121317
ALDH16A1	0.230514	0.0205124	4.50316	2.16368e-05	0.000145045	2.00215	ALDH16A1	64	4.55143	1.78505e-05	0.000121561
SCAMP3	0.211876	-0.0111741	4.51458	2.07218e-05	0.00013956	2.04369	SCAMP3	38	4.55052	1.79119e-05	0.000121912
PACS1	0.374393	0.191526	4.52961	1.95745e-05	0.000132788	2.09845	PACS1	26	4.54956	1.79776e-05	0.000122291
SIGIRR	-0.592657	-0.180017	-4.53249	1.9362e-05	0.000131782	2.10895	SIGIRR	16	-4.54933	1.79937e-05	0.000122333
KANSL2	-0.191087	0.0255576	-4.54432	1.85115e-05	0.000126504	2.15215	KANSL2	20	-4.54715	1.81433e-05	0.000123282
NPRL2	0.297057	0.108605	4.53048	1.95099e-05	0.000132568	2.10163	NPRL2	21	4.54482	1.83051e-05	0.000124313
KIRREL2	-1.01412	-0.208092	-4.73825	1.81368e-05	0.000124266	2.4745	KIRREL2	1	-4.72803	1.83265e-05	0.000124335
RFC5	-0.156602	0.0288752	-4.4453	2.69084e-05	0.000175954	1.79269	RFC5	98	-4.54449	1.83285e-05	0.000124335
ANGPTL2	0.788034	-0.442878	4.57143	1.86798e-05	0.000127561	2.20315	ANGPTL2	2	4.57327	1.83438e-05	0.000124371
DDA1	-0.167922	-0.0424174	-4.53738	1.90061e-05	0.000129717	2.12679	DDA1	22	-4.54305	1.84292e-05	0.000124881
PMM2	0.278937	0.0301788	4.50184	2.17451e-05	0.000145589	1.99736	PMM2	57	4.53906	1.87105e-05	0.000126717
TSPYL4	-0.517869	-0.00331457	-4.55408	1.78376e-05	0.000122556	2.18782	TSPYL4	2	-4.53598	1.89314e-05	0.000128143
PGAP1	-0.789673	0.104626	-4.56225	1.93308e-05	0.000131641	2.17018	PGAP1	2	-4.56425	1.8973e-05	0.000128353
ELK3	0.981638	-0.488577	4.52317	2.00588e-05	0.0001357	2.07495	ELK3	3	4.53521	1.89867e-05	0.000128353
COMMD1	-0.293723	0.05854	-4.52092	2.02306e-05	0.000136712	2.06675	COMMD1	21	-4.53511	1.89937e-05	0.000128353
RNF114	-0.207257	-0.000333322	-4.50306	2.16452e-05	0.000145045	2.00178	RNF114	34	-4.53486	1.90123e-05	0.000128408
ANXA3	-1.11125	-0.467521	-4.51699	2.0534e-05	0.000138535	2.05244	ANXA3	5	-4.53285	1.91578e-05	0.000129321
PAK2	-0.181329	0.0972048	-4.44028	2.74202e-05	0.000178921	1.7746	PAK2	169	-4.53249	1.91845e-05	0.00012943
PSMD11	-0.123583	0.000712678	-4.34996	3.84126e-05	0.0002365	1.45121	PSMD11	219	-4.53059	1.93234e-05	0.000130295
UBE2A	-0.196524	-0.00184126	-4.79653	7.00478e-06	5.42002e-05	3.08867	UBE2A	2	-4.53027	1.93466e-05	0.000130381
SH2D4A	1.09675	-0.808444	4.54651	2.04978e-05	0.000138366	2.11377	SH2D4A	2	4.55838	1.9393e-05	0.000130622
EPHX4	-1.26995	-0.250533	-4.51677	2.05507e-05	0.000138571	2.05166	EPHX4	1	-4.52782	1.95279e-05	0.000131459
ICAM3	-0.58044	-0.157628	-4.5061	2.13979e-05	0.000143733	2.01283	ICAM3	24	-4.52558	1.96945e-05	0.000132508
ZBTB16	-1.04512	0.290942	-4.62537	2.13384e-05	0.000143411	2.22672	ZBTB16	4	-4.64204	1.97584e-05	0.000132861
CDH2	-0.732562	0.00586013	-4.50915	2.11526e-05	0.000142318	2.02391	CDH2	10	-4.52459	1.97685e-05	0.000132861
SOX7	1.09783	-0.198307	4.82366	1.9596e-05	0.00013286	2.5203	SOX7	1	4.80691	1.99696e-05	0.000134084
DPP3	-0.183777	0.010304	-4.43028	2.84681e-05	0.000185073	1.7386	DPP3	186	-4.52189	1.99723e-05	0.000134084
RECQL5	-0.239415	0.0606109	-4.47773	2.38171e-05	0.000157833	1.9099	RECQL5	58	-4.52107	2.00348e-05	0.000134431
GPR176	1.06827	-0.375972	4.63682	2.04947e-05	0.000138366	2.26561	GPR176	1	4.63796	2.00458e-05	0.000134431
CBX1	-0.52089	-0.152594	-4.49561	2.22636e-05	0.000148899	1.97471	CBX1	55	-4.52035	2.00893e-05	0.000134649
CSNK1A1	-0.159465	-0.040365	-4.53214	1.93877e-05	0.000131883	2.10767	CSNK1A1	18	-4.51772	2.02912e-05	0.000135929
ZNRD1	0.317938	0.0365255	4.54973	1.81349e-05	0.000124266	2.17192	ZNRD1	5	4.51737	2.0318e-05	0.000136034
CMPK2	-0.672853	-0.111471	-4.49542	2.2279e-05	0.000148921	1.97404	CMPK2	40	-4.51721	2.03302e-05	0.000136043
APLP2	-0.491018	-0.172466	-4.49923	2.19609e-05	0.000146954	1.98787	APLP2	15	-4.5138	2.05949e-05	0.000137739
NUB1	0.267061	0.0491285	4.46915	2.45997e-05	0.000162408	1.87884	NUB1	81	4.51354	2.06154e-05	0.000137755
GK	0.460355	0.130752	4.53008	1.95399e-05	0.000132699	2.10015	GK	3	4.51348	2.06197e-05	0.000137755
TBCC	0.162443	0.0607748	4.47546	2.4022e-05	0.000158934	1.90167	TBCC	32	4.50987	2.09038e-05	0.000139578
CORO1B	0.602485	0.0751044	4.48464	2.32044e-05	0.000154353	1.93494	CORO1B	45	4.50731	2.11077e-05	0.000140863
SMPD3	-0.96739	-0.525059	-4.53177	2.16521e-05	0.000145045	2.06108	SMPD3	1	-4.53475	2.11799e-05	0.000141268
CDR2	-0.388374	-0.122794	-4.48856	2.28643e-05	0.000152338	1.94913	CDR2	22	-4.50593	2.12184e-05	0.000141448
FAH	-0.481014	-0.0334154	-4.48116	2.35115e-05	0.000156144	1.9223	FAH	33	-4.50305	2.14517e-05	0.000142926
NEMP2	-0.266022	0.089567	-4.55756	1.76026e-05	0.00012128	2.20057	NEMP2	5	-4.50285	2.14677e-05	0.000142956
RFX7	-0.215588	-0.0330273	-4.47006	2.45159e-05	0.000162029	1.88212	RFX7	35	-4.50171	2.15603e-05	0.000143495
TRPV2	-0.796107	-0.464806	-4.48049	2.35708e-05	0.000156369	1.91989	TRPV2	26	-4.50042	2.16657e-05	0.000144119
XAB2	-0.137577	0.0314952	-4.35903	3.7141e-05	0.000230136	1.48348	XAB2	168	-4.49925	2.17627e-05	0.000144686
STING1	-0.723358	0.127236	-4.47661	2.39181e-05	0.000158332	1.90583	STING1	22	-4.49583	2.20463e-05	0.000146453
LRRC42	-0.231551	0.00667418	-4.48708	2.29919e-05	0.000153105	1.94378	LRRC42	20	-4.49564	2.20614e-05	0.000146453
CDADC1	-0.39989	-0.0781092	-4.56763	1.69408e-05	0.000117376	2.23745	CDADC1	1	-4.49561	2.20642e-05	0.000146453
MME	1.05313	-0.169505	4.4716	2.43741e-05	0.000161178	1.88769	MME	61	4.4928	2.22999e-05	0.000147938
RALB	0.575026	-0.0572997	4.4851	2.31649e-05	0.000154174	1.93657	RALB	5	4.48949	2.25807e-05	0.00014972
CEP68	0.345326	0.151246	4.47716	2.38683e-05	0.000158088	1.90783	CEP68	17	4.4888	2.26399e-05	0.000150032
ADPRM	0.301825	0.015179	4.55389	1.78499e-05	0.000122572	2.18716	ADPRM	3	4.48863	2.26548e-05	0.00015005
COMMD6	-0.256309	0.0947264	-4.54427	1.85148e-05	0.000126504	2.15198	COMMD6	5	-4.48455	2.30067e-05	0.000152299
MCM3AP	0.107452	0.0722829	4.29623	4.68591e-05	0.0002812	1.26079	MCM3AP	115	4.48433	2.30256e-05	0.000152342
ZNF579	0.253759	0.0870614	4.49352	2.24395e-05	0.000149751	1.96714	ZNF579	12	4.48385	2.30674e-05	0.000152537
PRMT6	0.272086	0.0969927	4.48329	2.33234e-05	0.000155061	1.93002	PRMT6	14	4.48323	2.31218e-05	0.000152814
CRNKL1	-0.15358	-0.0200573	-4.37724	3.47087e-05	0.000217057	1.54842	CRNKL1	118	-4.48269	2.31693e-05	0.000152892
OXR1	0.550243	-0.107756	4.45885	2.55724e-05	0.00016793	1.84159	OXR1	52	4.48258	2.31784e-05	0.000152892
SCFD2	-0.195884	0.104332	-4.44744	2.66934e-05	0.000174733	1.80039	SCFD2	36	-4.48255	2.31812e-05	0.000152892
CD180	0.977519	-0.326617	4.46594	2.48987e-05	0.000164118	1.86724	CD180	8	4.48253	2.31831e-05	0.000152892
KMO	1.30819	-0.216268	4.46958	2.45599e-05	0.000162232	1.88039	KMO	1	4.48121	2.32993e-05	0.000153576
PANK3	-0.388648	-0.151491	-4.49461	2.23477e-05	0.000149219	1.97109	PANK3	5	-4.48048	2.33631e-05	0.000153914
ST13	-0.199699	0.0428806	-4.393	3.27283e-05	0.000207302	1.60477	ST13	304	-4.47819	2.35659e-05	0.000155167
GTF2H1	0.167015	0.0799566	4.42931	2.85722e-05	0.000185652	1.73509	GTF2H1	41	4.47759	2.36195e-05	0.000155437
RGL2	0.317111	0.0410522	4.47844	2.37536e-05	0.000157497	1.91246	RGL2	11	4.47703	2.36701e-05	0.000155687
ECHDC3	0.96771	-0.0985865	4.49523	2.47938e-05	0.000163515	1.93078	ECHDC3	2	4.50432	2.37173e-05	0.000155914
AK5	0.901532	-0.79871	4.46073	2.5392e-05	0.000167051	1.84839	AK5	4	4.47312	2.40219e-05	0.000157832
ARHGEF1	-0.269158	0.112785	-4.41692	2.99294e-05	0.000193552	1.69055	ARHGEF1	249	-4.47166	2.41544e-05	0.000158619
PITHD1	0.158898	0.0332005	4.39053	3.30302e-05	0.000208785	1.59596	PITHD1	71	4.4706	2.42508e-05	0.000159167
CUX1	0.328579	-0.0387849	4.42849	2.86601e-05	0.000186125	1.73214	CUX1	185	4.47029	2.42794e-05	0.00015927
CTSZ	0.726972	-0.0713833	4.45938	2.5521e-05	0.000167682	1.84353	CTSZ	5	4.46966	2.43374e-05	0.000159565
SMAD3	0.643682	0.0846754	4.45604	2.58443e-05	0.000169626	1.83143	SMAD3	9	4.46926	2.43739e-05	0.000159714
SMIM12	-0.216824	0.0712248	-4.49498	2.23167e-05	0.000149093	1.97242	SMIM12	11	-4.46913	2.4386e-05	0.000159714
TAF3	-0.139106	0.0560963	-4.52548	1.98833e-05	0.00013466	2.0834	TAF3	14	-4.46824	2.44682e-05	0.000160167
SYNJ1	-0.302966	-0.0783485	-4.43849	2.76049e-05	0.000179935	1.76815	SYNJ1	43	-4.46777	2.45118e-05	0.000160367
ITM2B	-0.502534	0.00361083	-4.45522	2.59244e-05	0.00016997	1.82847	ITM2B	10	-4.46553	2.47192e-05	0.000161638
RAB27B	-0.995687	0.0154546	-4.57359	2.50109e-05	0.00016477	2.06602	RAB27B	1	-4.57175	2.47527e-05	0.000161772
CERT1	-0.225025	0.00557333	-4.41508	3.01362e-05	0.000194552	1.68394	CERT1	68	-4.46411	2.48518e-05	0.000162331
ESRRA	0.310099	-0.197725	4.46364	2.51161e-05	0.000165375	1.85888	ESRRA	12	4.46398	2.48645e-05	0.000162331
RHOF	-0.52551	-0.078632	-4.44464	2.69747e-05	0.000176294	1.79033	RHOF	17	-4.46095	2.51503e-05	0.000163972
TTI2	-0.239586	-0.0226544	-4.43569	2.78965e-05	0.000181644	1.75807	TTI2	31	-4.4609	2.51549e-05	0.000163972
CYB5R1	0.373917	0.208266	4.43976	2.74734e-05	0.000179173	1.77274	CYB5R1	29	4.46089	2.51559e-05	0.000163972
EIF4EBP1	0.19325	-0.0655462	4.41996	2.95904e-05	0.00019146	1.70148	EIF4EBP1	39	4.45866	2.53681e-05	0.000165268
SIGLEC6	-1.60575	0.166263	-4.70111	2.77378e-05	0.000180706	2.17261	SIGLEC6	1	-4.71713	2.55259e-05	0.000166208
COMT	0.314481	0.0712426	4.41409	3.02481e-05	0.000194897	1.68039	COMT	136	4.45548	2.56734e-05	0.00016708
PRMT9	-0.225396	0.0745536	-4.43041	2.84545e-05	0.000185073	1.73905	PRMT9	30	-4.45506	2.57145e-05	0.000167191
SRP72	-0.116667	0.0270785	-4.26833	5.19263e-05	0.000306975	1.16249	SRP72	199	-4.45503	2.57175e-05	0.000167191
UCK1	-0.352151	-0.0483185	-4.45996	2.54655e-05	0.000167407	1.84561	UCK1	8	-4.45442	2.57766e-05	0.000167487
KIAA1143	-0.237164	0.0147149	-4.4158	3.00548e-05	0.000194159	1.68654	KIAA1143	49	-4.4542	2.57983e-05	0.000167539
BMP2K	0.455845	-0.0349385	4.42701	2.88199e-05	0.000186918	1.72681	BMP2K	64	4.45355	2.58607e-05	0.000167856
MCRS1	-0.140963	0.00186384	-4.41656	2.99699e-05	0.000193712	1.68925	MCRS1	31	-4.45176	2.60355e-05	0.000168902
DLST	0.287062	0.0979307	4.40741	3.1013e-05	0.000198374	1.65642	DLST	117	4.45158	2.60538e-05	0.000168931
GET4	-0.257373	-0.0248635	-4.42693	2.88278e-05	0.000186918	1.72654	GET4	31	-4.45135	2.60763e-05	0.000168988
USP25	0.242608	0.0330437	4.40132	3.17268e-05	0.00020231	1.63459	USP25	87	4.45056	2.61539e-05	0.000169402
BMT2	-0.311607	0.220087	-4.49128	2.263e-05	0.00015094	1.95902	BMT2	4	-4.44831	2.63765e-05	0.000170755
SEC24B	-0.132992	0.051293	-4.35426	3.78045e-05	0.000233339	1.4665	SEC24B	61	-4.44811	2.63956e-05	0.000170789
IL6ST	0.619228	0.0401427	4.44699	2.67382e-05	0.000174933	1.79878	IL6ST	3	4.44748	2.6459e-05	0.000171109
ATP11C	0.271875	0.0539099	4.41484	3.01631e-05	0.000194552	1.68309	ATP11C	43	4.44612	2.65943e-05	0.000171894
KLHL3	-0.635802	-0.0405119	-4.67977	2.1434e-05	0.000143897	2.30399	KLHL3	1	-4.60846	2.67286e-05	0.000172672
METTL7B	0.751067	-0.634521	4.44776	2.6661e-05	0.000174614	1.80156	METTL7B	1	4.44288	2.6921e-05	0.000173823
RNF10	-0.330529	-0.142376	-4.43185	2.83015e-05	0.000184184	1.74423	RNF10	16	-4.44148	2.70628e-05	0.000174647
AMBRA1	-0.158804	-0.023745	-4.41419	3.02362e-05	0.000194897	1.68076	AMBRA1	29	-4.44107	2.71042e-05	0.000174823
IQGAP1	0.287799	0.0496031	4.3859	3.36062e-05	0.000211558	1.57938	IQGAP1	884	4.44017	2.71959e-05	0.000175289
PBX3	0.461915	-0.0625495	4.44373	2.7068e-05	0.00017681	1.78701	PBX3	5	4.44009	2.72049e-05	0.000175289
PRKACA	-0.276598	0.042145	-4.40894	3.08357e-05	0.000197445	1.66192	PRKACA	37	-4.43666	2.75579e-05	0.00017747
COA1	-0.306347	-0.024075	-4.44806	2.66306e-05	0.000174508	1.80265	COA1	8	-4.43465	2.77667e-05	0.000178722
RAPGEF2	0.439697	-0.200946	4.41008	3.07049e-05	0.000197006	1.666	RAPGEF2	38	4.43316	2.7922e-05	0.000179628
SEL1L	0.236659	0.020481	4.38723	3.34403e-05	0.000210857	1.58413	SEL1L	65	4.43183	2.80619e-05	0.000180434
TRGC2	-1.35007	-1.74612	-4.4132	3.03489e-05	0.000195444	1.67719	TRGC2	3	-4.42889	2.83739e-05	0.000182344
SEPTIN11	0.614841	-0.0737429	4.40704	3.10555e-05	0.000198439	1.65511	SEPTIN11	39	4.42855	2.84095e-05	0.000182478
HMGB1	0.301135	0.0778817	4.38016	3.43324e-05	0.00021525	1.55888	HMGB1	242	4.42678	2.85996e-05	0.000183604
LRFN1	-0.318171	-0.0892039	-4.60743	1.63279e-05	0.000113834	2.33271	LRFN1	1	-4.45148	2.88398e-05	0.000185049
RCN2	-0.266864	-0.00676452	-4.37783	3.46317e-05	0.000216686	1.55055	RCN2	99	-4.42314	2.89927e-05	0.000185933
PTTG1IP	-0.450661	0.281413	-4.42296	2.92597e-05	0.000189419	1.71227	PTTG1IP	6	-4.42214	2.91019e-05	0.000186537
LIN7C	0.347204	-0.0731868	4.4071	3.10489e-05	0.000198439	1.65531	LIN7C	18	4.41998	2.93382e-05	0.000187883
GALK2	-0.316368	0.164767	-4.3947	3.25204e-05	0.000206515	1.61089	GALK2	36	-4.41994	2.93425e-05	0.000187883
CCNH	-0.157138	-0.00825508	-4.37072	3.55613e-05	0.000221792	1.52515	CCNH	40	-4.41966	2.93728e-05	0.00018798
TRIM46	-0.677124	-0.00985628	-4.41485	3.01623e-05	0.000194552	1.68311	TRIM46	3	-4.41869	2.94806e-05	0.000188522
CROCC	-0.372468	0.215639	-4.3844	3.37949e-05	0.000212637	1.57401	CROCC	125	-4.41862	2.94882e-05	0.000188522
CBR1	0.953341	0.120521	4.39687	3.22587e-05	0.000205382	1.61864	CBR1	33	4.41694	2.96745e-05	0.000189615
MAPK6	-0.581176	-0.373399	-4.41081	3.06217e-05	0.00019679	1.6686	MAPK6	5	-4.41594	2.97854e-05	0.000190226
ATG101	-0.175586	0.0547664	-4.45572	2.58752e-05	0.000169738	1.83029	ATG101	12	-4.41571	2.9812e-05	0.000190296
CLMN	0.602282	-0.0288363	4.39445	3.25515e-05	0.000206607	1.60997	CLMN	28	4.41436	2.99629e-05	0.000191161
RTF2	-0.207815	-0.0265761	-4.35893	3.71549e-05	0.000230136	1.48312	RTF2	73	-4.4134	3.00706e-05	0.000191749
NOB1	0.296658	-0.1045	4.38391	3.38558e-05	0.000212912	1.57228	NOB1	42	4.41259	3.01619e-05	0.000192231
ATPAF1	-0.438344	-0.132272	-4.39527	3.2452e-05	0.000206294	1.6129	ATPAF1	17	-4.40998	3.04591e-05	0.000194025
DENND1A	0.315985	-0.0214226	4.39188	3.28648e-05	0.000208059	1.60078	DENND1A	24	4.40953	3.05096e-05	0.000194246
RHEX	-1.32289	-0.328713	-4.55878	3.32848e-05	0.000210178	1.88887	RHEX	2	-4.57593	3.07332e-05	0.000195569
RIC8B	-0.342169	-0.0406013	-4.4052	3.12696e-05	0.000199704	1.64852	RIC8B	11	-4.40735	3.07604e-05	0.000195641
FAM117B	-0.338502	0.031688	-4.39504	3.24793e-05	0.000206361	1.6121	FAM117B	17	-4.40644	3.08646e-05	0.000196203
EOMES	-1.08454	-1.03329	-4.50493	3.18325e-05	0.000202879	1.83386	EOMES	1	-4.50855	3.09285e-05	0.000196507
HSPB11	-0.15714	0.00834108	-4.37893	3.44908e-05	0.000216023	1.55446	HSPB11	29	-4.40563	3.09591e-05	0.000196601
CNPY3	0.27981	0.0625219	4.37062	3.55738e-05	0.000221792	1.52481	CNPY3	56	4.40541	3.09844e-05	0.00019666
ZDHHC4	-0.378474	-0.0243094	-4.4824	2.34013e-05	0.000155495	1.92682	ZDHHC4	1	-4.40514	3.10155e-05	0.000196756
NUDT14	0.470646	0.119678	4.41156	3.05354e-05	0.000196338	1.67131	NUDT14	4	4.40474	3.10616e-05	0.000196884
LZIC	-0.23036	0.10174	-4.36714	3.60376e-05	0.000224365	1.51239	LZIC	47	-4.40469	3.10677e-05	0.000196884
GSDMB	-1.19701	-0.752277	-4.4974	3.26834e-05	0.000207124	1.80848	GSDMB	1	-4.50545	3.12677e-05	0.00019805
CTNNB1	-0.518162	0.085002	-4.3872	3.34435e-05	0.000210857	1.58404	CTNNB1	16	-4.40276	3.1293e-05	0.000198109
CHD2	0.199618	0.0932145	4.33824	4.01203e-05	0.000245421	1.40952	CHD2	94	4.40152	3.1439e-05	0.000198931
ZSCAN12	0.675927	-0.0523752	4.39622	3.23367e-05	0.000205773	1.61632	ZSCAN12	3	4.40012	3.16035e-05	0.000199869
ZNF33A	0.243117	-0.0580559	4.48065	2.35568e-05	0.000156361	1.92045	ZNF33A	4	4.39919	3.17136e-05	0.000200462
RUFY3	-0.451842	-0.00812091	-4.37549	3.49347e-05	0.00021836	1.5422	RUFY3	42	-4.39892	3.17465e-05	0.000200568
LPIN1	0.37433	0.0848678	4.37785	3.46287e-05	0.000216686	1.55063	LPIN1	29	4.39865	3.17786e-05	0.000200668
ANKRD13D	0.334064	-0.065554	4.39954	3.19389e-05	0.000203451	1.6282	ANKRD13D	10	4.39842	3.18058e-05	0.000200736
RAB23	-0.335169	0.0468016	-4.38272	3.40064e-05	0.000213749	1.56803	RAB23	19	-4.39618	3.20729e-05	0.000202318
NLN	0.365626	-0.072458	4.36278	3.66273e-05	0.00022744	1.49683	NLN	103	4.39604	3.20901e-05	0.000202323
SFXN5	0.458968	0.103505	4.40985	3.07312e-05	0.000197006	1.66518	SFXN5	3	4.39535	3.21729e-05	0.000202737
HIKESHI	-0.2508	0.0507363	-4.42405	2.91408e-05	0.000188749	1.71618	HIKESHI	8	-4.39522	3.21886e-05	0.000202737
RAB20	0.690004	0.0850282	4.38989	3.31093e-05	0.000209178	1.59367	RAB20	3	4.39446	3.22795e-05	0.000203206
JMJD6	-0.187919	0.00298477	-4.35238	3.80703e-05	0.000234627	1.45979	JMJD6	42	-4.39414	3.23187e-05	0.000203349
RAD54B	-0.453004	-0.101736	-4.39406	3.25982e-05	0.000206797	1.60859	RAD54B	6	-4.39371	3.23704e-05	0.000203447
GMNN	-0.375722	-0.197613	-4.37978	3.43814e-05	0.000215448	1.55751	GMNN	18	-4.39363	3.23798e-05	0.000203447
DUS3L	-0.257071	0.0195976	-4.35766	3.73298e-05	0.000230807	1.47862	DUS3L	52	-4.3936	3.23838e-05	0.000203447
HIVEP2	0.372946	0.0442349	4.36443	3.64033e-05	0.000226277	1.50271	HIVEP2	59	4.39292	3.24659e-05	0.000203859
GPD1L	0.627963	-0.0252139	4.37365	3.51756e-05	0.000219754	1.53561	GPD1L	24	4.39267	3.24962e-05	0.000203945
TSNAX	0.214926	0.104499	4.35327	3.79442e-05	0.000233967	1.46297	TSNAX	45	4.39193	3.25866e-05	0.000204409
HFE	0.585431	-0.0168224	4.41017	3.06944e-05	0.000197006	1.66633	HFE	1	4.39037	3.27768e-05	0.000205497
DUSP28	0.423603	0.208035	4.48872	2.53978e-05	0.000167051	1.90765	DUSP28	1	4.41511	3.29725e-05	0.000206619
SLC10A7	-0.402417	-0.0763163	-4.41241	3.04383e-05	0.000195918	1.67437	SLC10A7	3	-4.38772	3.31036e-05	0.000207335
RABEP1	0.205491	0.0931498	4.31585	4.35858e-05	0.00026374	1.33014	RABEP1	179	4.38738	3.31459e-05	0.000207494
PAN3	0.47276	0.103156	4.35947	3.70803e-05	0.000229905	1.48505	PAN3	70	4.38542	3.33894e-05	0.000208913
SLC38A5	0.643918	-0.476423	4.37301	3.52591e-05	0.000220164	1.53333	SLC38A5	7	4.38416	3.35458e-05	0.000209785
SCIMP	0.904347	-0.412929	4.3807	3.42643e-05	0.000214932	1.56078	SCIMP	1	4.3839	3.35791e-05	0.000209886
ENAH	0.664476	0.0997835	4.36096	3.68747e-05	0.000228746	1.49038	ENAH	61	4.38334	3.36486e-05	0.000210214
NEDD4	-0.438863	-0.0854457	-4.35789	3.72986e-05	0.000230807	1.47942	NEDD4	52	-4.38297	3.36956e-05	0.000210401
E2F6	-0.328913	-0.140205	-4.38112	3.42097e-05	0.000214699	1.56231	E2F6	11	-4.38203	3.38136e-05	0.000211031
INO80	0.309736	0.0718337	4.3505	3.83358e-05	0.000236146	1.45312	INO80	54	4.38172	3.38538e-05	0.000211175
PRXL2B	-0.423068	0.0717224	-4.40148	3.17076e-05	0.000202292	1.63517	PRXL2B	3	-4.3812	3.39186e-05	0.000211472
CANX	0.203628	-0.0209084	4.2957	4.69501e-05	0.000281472	1.25893	CANX	700	4.37976	3.41019e-05	0.000212413
PTPN3	-0.855006	-0.316911	-4.49161	3.33512e-05	0.00021049	1.78903	PTPN3	1	-4.4807	3.41039e-05	0.000212413
MAP3K6	0.479577	-0.0635169	4.43858	3.09886e-05	0.00019832	1.72213	MAP3K6	2	4.40899	3.41811e-05	0.000212786
ENPP4	-0.795312	-0.268019	-4.36534	3.62804e-05	0.000225627	1.50596	ENPP4	6	-4.37843	3.4271e-05	0.000213238
RNF145	-0.329652	-0.0155642	-4.41178	3.05103e-05	0.000196279	1.6721	RNF145	4	-4.37794	3.4334e-05	0.000213522
IRF5	0.910599	-0.666063	4.36361	3.65134e-05	0.000226847	1.49982	IRF5	5	4.37733	3.44124e-05	0.000213902
CENPQ	-0.270299	-0.0556296	-4.3561	3.75473e-05	0.000231868	1.47305	CENPQ	27	-4.37609	3.45725e-05	0.000214788
FSD1L	0.547291	-0.207068	4.3576	3.73382e-05	0.000230807	1.4784	FSD1L	19	4.37479	3.47393e-05	0.000215716
LRRC47	-0.239792	0.148921	-4.32011	4.29046e-05	0.000260168	1.34523	LRRC47	135	-4.37445	3.47834e-05	0.000215778
SENP5	-0.172187	0.0327177	-4.38181	3.41219e-05	0.000214257	1.56477	SENP5	18	-4.37445	3.47843e-05	0.000215778
RBM38	0.496783	-0.0382747	4.39084	3.29921e-05	0.000208721	1.59707	RBM38	2	4.37302	3.49696e-05	0.000216819
HNRNPH3	-0.158889	0.0606098	-4.26851	5.18914e-05	0.000306916	1.16313	HNRNPH3	172	-4.37217	3.50814e-05	0.000217403
ACBD7	-0.696435	-0.144486	-4.35353	3.79078e-05	0.00023386	1.46389	ACBD7	21	-4.372	3.51033e-05	0.000217429
BCL9L	0.44675	-0.0130326	4.35762	3.73363e-05	0.000230807	1.47845	BCL9L	16	4.37177	3.5133e-05	0.000217504
GMDS	-0.237364	0.067911	-4.32298	4.24525e-05	0.000257895	1.35538	GMDS	83	-4.37075	3.52675e-05	0.000218227
TFAM	0.244682	0.202682	4.32733	4.17743e-05	0.000254528	1.37081	TFAM	69	4.37023	3.53357e-05	0.000218437
TDRD3	-0.200629	0.0164502	-4.3263	4.19336e-05	0.000255246	1.36716	TDRD3	49	-4.37022	3.53369e-05	0.000218437
CLEC14A	0.790217	-0.324432	4.36186	3.6752e-05	0.000228099	1.49357	CLEC14A	3	4.37008	3.53557e-05	0.000218444
PTS	-0.731736	-0.320208	-4.36711	3.60411e-05	0.000224365	1.5123	PTS	2	-4.36951	3.54299e-05	0.000218792
KANSL1	-0.189332	-0.0355327	-4.32007	4.29111e-05	0.000260168	1.34509	KANSL1	48	-4.36611	3.58816e-05	0.000221471
DHX34	-0.252297	0.00475193	-4.33851	4.00788e-05	0.000245289	1.41051	DHX34	34	-4.36493	3.60408e-05	0.000222342
[truncated: 10,328 more rows]
