# Supplementary material for: Multi-omics molecular phenotyping of childhood acute lymphoblastic leukemia cell lines reveals novel drug vulnerabilities
Source: Research Square preprint supplement (doi:10.21203/rs.3.rs-443839/v1), 2021-04-29
Supplement: Supplementary file 4 [file 5d2e8804dd17ab56cd075a07.xlsx]

## Sheet: Supp_Table_6
Supplementary Table 6: GSEA analysis table of the positively enriched pathways between CLC3 and CLC7 against the KEGG and HALLMARK pathway genesets
Gene set	SIZE	ES	NES	NOM p-val	FDR q-val	FWER p-val	RANK AT MAX	LEADING EDGE
KEGG_SPLICEOSOME	121	0.54	2.1	0	0.001	0.001	4714	tags=85%, list=41%, signal=143%
HALLMARK_E2F_TARGETS	198	0.49	2.03	0	0.001	0.003	4366	tags=73%, list=38%, signal=115%
HALLMARK_G2M_CHECKPOINT	191	0.47	1.92	0	0.006	0.027	3903	tags=62%, list=34%, signal=93%
KEGG_DNA_REPLICATION	35	0.61	1.9	0	0.006	0.035	3379	tags=66%, list=29%, signal=93%
KEGG_RNA_POLYMERASE	25	0.55	1.62	0.014	0.085	0.476	4414	tags=76%, list=38%, signal=123%
HALLMARK_MYC_TARGETS_V1	194	0.38	1.61	0	0.076	0.497	4589	tags=58%, list=40%, signal=95%
KEGG_HOMOLOGOUS_RECOMBINATION	26	0.56	1.6	0.006	0.077	0.558	3462	tags=54%, list=30%, signal=77%
KEGG_BASAL_TRANSCRIPTION_FACTORS	31	0.52	1.59	0.012	0.068	0.565	3997	tags=65%, list=35%, signal=99%
KEGG_DRUG_METABOLISM_CYTOCHROME_P450	24	0.52	1.46	0.078	0.16	0.9	1685	tags=42%, list=15%, signal=49%
KEGG_HEMATOPOIETIC_CELL_LINEAGE	58	0.43	1.43	0.041	0.177	0.933	356	tags=19%, list=3%, signal=19%
KEGG_PRIMARY_IMMUNODEFICIENCY	33	0.46	1.42	0.075	0.175	0.947	1412	tags=30%, list=12%, signal=34%
KEGG_METABOLISM_OF_XENOBIOTICS_BY_CYTOCHROME_P450	26	0.48	1.4	0.082	0.176	0.959	1530	tags=38%, list=13%, signal=44%
HALLMARK_KRAS_SIGNALING_DN	79	0.37	1.37	0.051	0.204	0.982	810	tags=22%, list=7%, signal=23%
KEGG_TYROSINE_METABOLISM	23	0.48	1.34	0.145	0.219	0.994	1275	tags=30%, list=11%, signal=34%
HALLMARK_HEDGEHOG_SIGNALING	23	0.47	1.34	0.111	0.211	0.995	1809	tags=43%, list=16%, signal=52%
HALLMARK_NOTCH_SIGNALING	23	0.46	1.29	0.161	0.261	1	884	tags=30%, list=8%, signal=33%
KEGG_CELL_CYCLE	114	0.33	1.26	0.085	0.28	1	2305	tags=32%, list=20%, signal=39%
KEGG_TGF_BETA_SIGNALING_PATHWAY	49	0.37	1.25	0.139	0.283	1	1735	tags=22%, list=15%, signal=26%
KEGG_MISMATCH_REPAIR	22	0.45	1.25	0.193	0.272	1	3307	tags=55%, list=29%, signal=76%
KEGG_O_GLYCAN_BIOSYNTHESIS	17	0.44	1.17	0.25	0.395	1	1053	tags=35%, list=9%, signal=39%
HALLMARK_MYC_TARGETS_V2	57	0.33	1.13	0.221	0.442	1	3807	tags=54%, list=33%, signal=81%
HALLMARK_TGF_BETA_SIGNALING	44	0.35	1.13	0.247	0.427	1	1276	tags=18%, list=11%, signal=20%
KEGG_NUCLEOTIDE_EXCISION_REPAIR	43	0.34	1.11	0.256	0.445	1	3529	tags=37%, list=31%, signal=54%
KEGG_GLUTATHIONE_METABOLISM	41	0.34	1.1	0.271	0.454	1	1076	tags=20%, list=9%, signal=21%
KEGG_LONG_TERM_DEPRESSION	44	0.32	1.05	0.365	0.558	1	1404	tags=27%, list=12%, signal=31%
HALLMARK_WNT_BETA_CATENIN_SIGNALING	27	0.35	1.04	0.396	0.559	1	1497	tags=30%, list=13%, signal=34%
KEGG_PROSTATE_CANCER	69	0.27	0.99	0.477	0.665	1	778	tags=13%, list=7%, signal=14%
KEGG_PROTEASOME	40	0.3	0.98	0.477	0.66	1	1765	tags=13%, list=15%, signal=15%
KEGG_DORSO_VENTRAL_AXIS_FORMATION	16	0.37	0.97	0.48	0.667	1	948	tags=25%, list=8%, signal=27%
KEGG_NOTCH_SIGNALING_PATHWAY	39	0.3	0.95	0.536	0.687	1	1522	tags=21%, list=13%, signal=24%
KEGG_NICOTINATE_AND_NICOTINAMIDE_METABOLISM	19	0.36	0.95	0.511	0.679	1	1151	tags=21%, list=10%, signal=23%
KEGG_THYROID_CANCER	22	0.34	0.94	0.547	0.673	1	778	tags=18%, list=7%, signal=19%
KEGG_RNA_DEGRADATION	56	0.26	0.92	0.601	0.692	1	4369	tags=59%, list=38%, signal=95%
KEGG_COLORECTAL_CANCER	52	0.27	0.9	0.671	0.719	1	2092	tags=25%, list=18%, signal=30%
HALLMARK_DNA_REPAIR	142	0.19	0.79	0.957	0.902	1	3568	tags=41%, list=31%, signal=59%
KEGG_SELENOAMINO_ACID_METABOLISM	23	0.27	0.75	0.833	0.933	1	1275	tags=17%, list=11%, signal=20%
KEGG_RIBOSOME	80	0.19	0.68	0.984	0.972	1	9342	tags=100%, list=81%, signal=533%
KEGG_AMINOACYL_TRNA_BIOSYNTHESIS	21	0.2	0.55	0.975	0.99	1	9198	tags=100%, list=80%, signal=502%
