# Supplementary material for: Multi-omics molecular phenotyping of childhood acute lymphoblastic leukemia cell lines reveals novel drug vulnerabilities
Source: Research Square preprint supplement (doi:10.21203/rs.3.rs-443839/v1), 2021-04-29
Supplement: Supplementary file 5 [file 5dfaa7e143c5219714f15268.xlsx]

## Sheet: Supp_Table_9
Supplementary Table 9: GSEA analysis table of the sDSS-protein Pearson correlation rank of Rigosertib KEGG, PID, and HALLMARK pathway genesets
Gene set	SIZE	ES	NES	NOM p-val	FDR q-val	FWER p-val	RANK AT MAX	LEADING EDGE
KEGG_RIBOSOME	79	0.7	3.22	0	0	0	1892	tags=80%, list=19%, signal=98%
HALLMARK_E2F_TARGETS	198	0.56	3.02	0	0	0	1382	tags=44%, list=14%, signal=50%
HALLMARK_G2M_CHECKPOINT	186	0.55	2.91	0	0	0	1398	tags=46%, list=14%, signal=52%
PID_PLK1_PATHWAY	43	0.67	2.65	0	0	0	1125	tags=58%, list=11%, signal=65%
PID_FOXM1_PATHWAY	31	0.7	2.62	0	0	0	703	tags=52%, list=7%, signal=55%
PID_AURORA_B_PATHWAY	35	0.66	2.54	0	0	0	972	tags=57%, list=10%, signal=63%
HALLMARK_MYC_TARGETS_V1	194	0.47	2.48	0	0	0	2199	tags=45%, list=22%, signal=56%
HALLMARK_MYC_TARGETS_V2	56	0.58	2.47	0	0	0	2581	tags=61%, list=26%, signal=82%
HALLMARK_MTORC1_SIGNALING	179	0.43	2.25	0	0	0.001	2635	tags=51%, list=27%, signal=69%
PID_FANCONI_PATHWAY	44	0.53	2.17	0	0	0.004	1921	tags=59%, list=19%, signal=73%
PID_MYC_ACTIV_PATHWAY	69	0.47	2.08	0	0.001	0.018	2557	tags=54%, list=26%, signal=72%
KEGG_CELL_CYCLE	113	0.41	2	0	0.002	0.049	1793	tags=36%, list=18%, signal=44%
HALLMARK_MITOTIC_SPINDLE	192	0.37	1.96	0	0.003	0.084	1666	tags=33%, list=17%, signal=39%
PID_BARD1_PATHWAY	29	0.53	1.92	0.002	0.004	0.112	2639	tags=59%, list=27%, signal=80%
HALLMARK_CHOLESTEROL_HOMEOSTASIS	55	0.45	1.88	0.002	0.006	0.168	1972	tags=44%, list=20%, signal=54%
PID_ATR_PATHWAY	36	0.47	1.81	0.004	0.013	0.352	1902	tags=53%, list=19%, signal=65%
PID_AURORA_A_PATHWAY	27	0.5	1.77	0.012	0.017	0.464	1116	tags=33%, list=11%, signal=37%
PID_P53_REGULATION_PATHWAY	55	0.42	1.77	0	0.017	0.481	2301	tags=44%, list=23%, signal=56%
KEGG_CYSTEINE_AND_METHIONINE_METABOLISM	27	0.47	1.75	0.008	0.019	0.538	1291	tags=44%, list=13%, signal=51%
KEGG_OOCYTE_MEIOSIS	86	0.37	1.73	0	0.02	0.59	2529	tags=45%, list=25%, signal=60%
KEGG_BIOSYNTHESIS_OF_UNSATURATED_FATTY_ACIDS	19	0.51	1.65	0.01	0.04	0.85	1289	tags=42%, list=13%, signal=48%
KEGG_ARGININE_AND_PROLINE_METABOLISM	36	0.42	1.65	0.006	0.039	0.85	921	tags=25%, list=9%, signal=27%
KEGG_DNA_REPLICATION	35	0.42	1.64	0.014	0.038	0.858	2295	tags=43%, list=23%, signal=56%
HALLMARK_UNFOLDED_PROTEIN_RESPONSE	101	0.33	1.58	0.002	0.06	0.96	2133	tags=33%, list=21%, signal=41%
KEGG_HOMOLOGOUS_RECOMBINATION	26	0.43	1.54	0.028	0.079	0.988	1920	tags=42%, list=19%, signal=52%
KEGG_UBIQUITIN_MEDIATED_PROTEOLYSIS	120	0.31	1.52	0.008	0.085	0.992	3097	tags=47%, list=31%, signal=67%
PID_P73PATHWAY	65	0.35	1.52	0.013	0.085	0.993	627	tags=22%, list=6%, signal=23%
HALLMARK_SPERMATOGENESIS	59	0.35	1.51	0.028	0.084	0.994	198	tags=19%, list=2%, signal=19%
KEGG_PROGESTERONE_MEDIATED_OOCYTE_MATURATION	65	0.34	1.51	0.021	0.085	0.995	2462	tags=46%, list=25%, signal=61%
PID_DELTA_NP63_PATHWAY	30	0.41	1.51	0.04	0.084	0.996	411	tags=20%, list=4%, signal=21%
