# Supplementary material for: Multi-omics molecular phenotyping of childhood acute lymphoblastic leukemia cell lines reveals novel drug vulnerabilities
Source: Research Square preprint supplement (doi:10.21203/rs.3.rs-443839/v1), 2021-04-29
Supplement: Supplementary file 7 [file 91a3bc31d46b2c033dd76a0e.xlsx]

## Sheet: Supp_Table_7
Supplementary Table 7: DEqMS analysis table of KMT2A-AFF1 vs KMT2A-MLLT1 cell lines
gene	logFC	AveExpr	t	P.Value	adj.P.Val	B	gene	count	sca.t	sca.P.Value	sca.adj.pval
IGF1R	2.21095	0.206751	7.78738	5.21e-10	2.9e-06	12.4284	IGF1R	25	7.83378	4.04e-10	4.5e-06
CLEC9A	3.02379	0.689522	9.82561	4.34e-10	2.9e-06	12.0895	CLEC9A	1	9.39492	8.24e-10	4.58e-06
TP53	2.44106	-0.161679	7.37865	2.15e-09	7.98e-06	11.1341	TP53	26	7.42581	1.68e-09	6.02e-06
PAN3	1.35903	0.321071	7.25832	3.27e-09	9.1e-06	10.7505	PAN3	70	7.35375	2.16e-09	6.02e-06
RYBP	-1.91207	-0.199847	-7.18051	4.29e-09	9.55e-06	10.502	RYBP	8	-7.17749	4.02e-09	8.95e-06
AFF4	0.922465	0.187228	6.3202	8.71e-08	0.000161608	7.73722	AFF4	32	6.36299	7.09e-08	0.000131563
ADGRL3	2.21864	0.112053	6.43091	1.82e-07	0.000290056	7.09838	ADGRL3	1	6.32376	2.34e-07	0.000372702
DTNA	2.51122	-0.0169981	6.48956	3.51e-07	0.000488317	6.49206	DTNA	1	6.3847	4.25e-07	0.000466663
PRSS12	1.95065	0.280845	6.14723	4.87e-07	0.000492993	6.1731	PRSS12	33	6.20553	3.78e-07	0.000466663
HOMER1	1.75541	-0.125677	5.79474	5.45e-07	0.000505611	6.04747	HOMER1	25	5.83009	4.61e-07	0.000466663
MCFD2	0.83309	0.10912	5.84321	4.61e-07	0.000492993	6.2029	MCFD2	22	5.84518	4.37e-07	0.000466663
ANGPT1	2.02136	-0.126332	6.19979	4.15e-07	0.000492993	6.31808	ANGPT1	1	6.05808	5.94e-07	0.000550724
PLOD2	2.10515	0.265651	5.98925	7.87e-07	0.000615837	5.73641	PLOD2	3	5.95845	8.06e-07	0.000610562
RAB23	1.02836	-0.0869931	5.67364	8.3e-07	0.000615837	5.65982	RAB23	19	5.68095	7.77e-07	0.000610562
MAP4K3	0.724689	0.0117028	5.74555	6.47e-07	0.000553685	5.8899	MAP4K3	13	5.66433	8.23e-07	0.000610562
GTF2I	0.555552	0.208676	5.33758	2.65e-06	0.00149127	4.59034	GTF2I	371	5.60062	1.03e-06	0.000714605
PCDH9	-3.6755	-0.920271	-5.50059	1.51e-06	0.00105048	5.10776	PCDH9	11	-5.53467	1.29e-06	0.000845889
SLC1A4	-1.69772	-0.504586	-5.45415	1.77e-06	0.00112504	4.96009	SLC1A4	36	-5.49481	1.48e-06	0.000917427
POTEI	-0.590234	-0.0118435	-5.44654	1.82e-06	0.00112504	4.93588	POTEI	20	-5.4063	2.02e-06	0.00112197
GDI2	-0.498382	0.132348	-5.12002	5.57e-06	0.0021854	3.90464	GDI2	544	-5.41944	1.93e-06	0.00112197
GMIP	-0.842648	-0.034277	-5.24995	3.57e-06	0.00172919	4.31342	GMIP	59	-5.32225	2.7e-06	0.00133177
RAP2C	-1.33241	-0.0342387	-5.31972	2.81e-06	0.00149127	4.53381	RAP2C	15	-5.33338	2.59e-06	0.00133177
GOLGA8N	-3.18198	-0.851309	-5.63739	2.77e-06	0.00149127	4.56092	GOLGA8N	1	-5.61816	2.75e-06	0.00133177
PAOX	-2.98821	0.0706272	-5.37743	3.28e-06	0.00165937	4.40458	PAOX	1	-5.36869	3.23e-06	0.0014993
LLGL2	1.54565	0.499322	5.23701	3.74e-06	0.00173211	4.27262	LLGL2	10	5.24747	3.49e-06	0.00155236
SCML2	1.72534	0.319991	5.18561	4.45e-06	0.00190581	4.11071	SCML2	58	5.23031	3.7e-06	0.00158335
KIF13A	1.92724	0.459878	5.18896	4.4e-06	0.00190581	4.12124	KIF13A	12	5.21163	3.94e-06	0.00162575
CD38	-1.9943	0.0790399	-5.08332	6.31e-06	0.00219369	3.78963	CD38	43	-5.12241	5.35e-06	0.0019866
RAB19	-2.71421	-0.307472	-5.13626	5.27e-06	0.00217148	3.95561	RAB19	1	-5.12868	5.24e-06	0.0019866
MPEG1	-4.40223	-1.27737	-5.18199	5.84e-06	0.0021854	3.8716	MPEG1	1	-5.20193	5.27e-06	0.0019866
LGR6	2.4262	-0.0886445	5.09378	6.09e-06	0.0021854	3.82238	LGR6	3	5.10236	5.73e-06	0.00205889
SNX19	-1.23978	0.00926091	-5.09816	6e-06	0.0021854	3.83611	SNX19	5	-5.06463	6.52e-06	0.00219513
STK17A	-1.29891	-0.660569	-5.07225	6.55e-06	0.00220872	3.75497	STK17A	7	-5.06187	6.58e-06	0.00219513
RIPK3	-2.87153	-0.373538	-5.02905	7.58e-06	0.00241126	3.61989	RIPK3	8	-5.05654	6.71e-06	0.00219513
PLXNA3	1.25483	0.326267	5.05724	6.89e-06	0.00225584	3.708	PLXNA3	5	5.02666	7.42e-06	0.00232574
N4BP2L2	0.745616	0.160307	5.01018	8.08e-06	0.00246578	3.561	N4BP2L2	20	5.00692	7.94e-06	0.00232574
NCOA3	-0.895853	0.0549671	-4.96286	9.49e-06	0.00267875	3.41354	NCOA3	45	-5.01351	7.76e-06	0.00232574
PRDX2	-1.82732	-0.126474	-4.95849	9.63e-06	0.00267875	3.39993	PRDX2	282	-5.00879	7.89e-06	0.00232574
PDE4A	-1.21244	0.143601	-4.93697	1.04e-05	0.00281033	3.33301	PDE4A	9	-4.93245	1.02e-05	0.00291818
CACNB4	2.0986	0.246129	5.34771	8.62e-06	0.00252433	3.55538	CACNB4	1	5.24579	1.08e-05	0.00300718
ZC3HAV1L	1.83136	0.226471	4.84094	1.43e-05	0.00338692	3.03537	ZC3HAV1L	28	4.87359	1.25e-05	0.00308661
CDKN2C	1.65326	0.230085	4.8662	1.31e-05	0.00328069	3.1135	CDKN2C	16	4.8899	1.18e-05	0.00308661
MBNL3	-0.954856	0.115808	-5.00604	8.2e-06	0.00246578	3.54808	MBNL3	3	-4.87885	1.23e-05	0.00308661
PXK	-1.1697	0.218892	-4.85683	1.36e-05	0.00328069	3.08452	PXK	34	-4.89252	1.17e-05	0.00308661
EMC10	-1.6893	-0.380479	-4.86772	1.31e-05	0.00328069	3.11823	EMC10	8	-4.88067	1.22e-05	0.00308661
FNBP1L	1.94769	0.0987086	4.81587	1.56e-05	0.00360729	2.95796	FNBP1L	41	4.85232	1.34e-05	0.00318159
HAGHL	-1.6765	-0.0439683	-4.85728	1.35e-05	0.00328069	3.0859	HAGHL	4	-4.85173	1.34e-05	0.00318159
HNF4G	2.52244	-0.183742	5.78608	1.13e-05	0.003004	3.28873	HNF4G	1	5.61513	1.47e-05	0.00341988
NEDD4	1.24317	-0.209949	4.74442	1.98e-05	0.00425706	2.73798	NEDD4	52	4.78779	1.67e-05	0.00378525
GRK3	-1.31996	-0.683198	-4.72313	2.12e-05	0.00445451	2.67262	GRK3	21	-4.74735	1.91e-05	0.00416583
DIRAS1	-2.36448	0.150857	-4.74243	1.99e-05	0.00425706	2.73186	DIRAS1	3	-4.75266	1.88e-05	0.00416583
SHTN1	1.87157	-0.0987932	4.76641	2.36e-05	0.0047681	2.59956	SHTN1	24	4.80097	2.04e-05	0.00437682
TMEM147	0.775559	0.157331	4.78356	1.73e-05	0.0038587	2.85837	TMEM147	6	4.69453	2.28e-05	0.00469561
LZTFL1	-1.56779	-0.115561	-4.66767	2.55e-05	0.00507047	2.50283	LZTFL1	24	-4.69644	2.26e-05	0.00469561
C5orf30	0.807607	0.0328375	4.80407	1.62e-05	0.00367622	2.92155	C5orf30	4	4.67726	2.41e-05	0.00488414
SLC16A10	1.64447	-0.358713	4.71154	2.2e-05	0.00454426	2.63707	SLC16A10	1	4.65374	2.61e-05	0.00509757
JADE3	-0.894205	0.00145218	-4.61515	3.04e-05	0.00564265	2.34261	JADE3	38	-4.65413	2.61e-05	0.00509757
YWHAG	0.536603	0.237938	4.49037	4.58e-05	0.00707007	1.96456	YWHAG	203	4.64591	2.68e-05	0.00514222
RCN2	0.664535	-0.0512761	4.52116	4.14e-05	0.00677863	2.05751	RCN2	99	4.6127	2.99e-05	0.00555501
CFLAR	-1.50373	-0.336522	-4.65036	2.7e-05	0.00518531	2.44997	CFLAR	2	-4.61253	2.99e-05	0.00555501
CLIC4	1.03864	0.430141	4.54677	3.81e-05	0.00642747	2.13499	CLIC4	131	4.60753	3.04e-05	0.00555562
CCHCR1	-0.620475	-0.0588535	-4.65238	2.68e-05	0.00518531	2.45612	CCHCR1	12	-4.58888	3.24e-05	0.00581548
PLA2G4A	1.78286	-0.73587	4.61464	3.04e-05	0.00564265	2.34108	PLA2G4A	1	4.5741	3.4e-05	0.00582587
PITPNB	0.505627	0.138376	4.43641	5.47e-05	0.00742246	1.80223	PITPNB	114	4.57472	3.4e-05	0.00582587
FBXO6	-1.72919	-0.205225	-4.58779	3.32e-05	0.00603807	2.25941	FBXO6	3	-4.58082	3.33e-05	0.00582587
B3GALNT1	3.27019	0.333308	6.14623	3.36e-05	0.00603807	2.2633	B3GALNT1	1	5.93801	3.84e-05	0.00591317
RBFOX2	1.792	0.0816122	4.55644	3.69e-05	0.00642747	2.16429	RBFOX2	5	4.56473	3.51e-05	0.00591317
AMPD2	0.90083	0.233132	4.47493	4.82e-05	0.00707007	1.91804	AMPD2	107	4.53932	3.82e-05	0.00591317
ZFYVE16	0.618655	0.191331	4.46628	4.96e-05	0.00716856	1.892	ZFYVE16	75	4.55125	3.67e-05	0.00591317
STAM2	-0.540992	0.0864552	-4.49365	4.53e-05	0.00707007	1.97445	STAM2	45	-4.55699	3.6e-05	0.00591317
PHF10	0.464772	0.113829	4.49705	4.48e-05	0.00707007	1.9847	PHF10	36	4.54268	3.78e-05	0.00591317
APOBEC3C	-1.25928	-0.131293	-4.50232	4.41e-05	0.00707007	2.00062	APOBEC3C	33	-4.53457	3.88e-05	0.00591317
FAS	-1.50317	-1.1036	-4.54181	3.87e-05	0.00642747	2.11999	FAS	9	-4.55395	3.64e-05	0.00591317
AP1B1	-0.485079	0.0409134	-4.37875	6.6e-05	0.00807371	1.62957	AP1B1	125	-4.52712	3.98e-05	0.00597877
ENAH	1.82047	0.454101	4.47458	4.83e-05	0.00707007	1.91698	ENAH	61	4.51126	4.19e-05	0.00599112
CWF19L2	0.489229	0.0208691	4.4001	6.16e-05	0.00770035	1.69339	CWF19L2	69	4.5067	4.25e-05	0.00599112
RSBN1L	0.56513	0.0912289	4.41572	5.85e-05	0.00753359	1.74017	RSBN1L	75	4.50893	4.22e-05	0.00599112
SEMA4D	-1.02884	-0.605592	-4.47449	4.83e-05	0.00707007	1.9167	SEMA4D	54	-4.51891	4.08e-05	0.00599112
MYO6	-3.84585	-1.87581	-4.47823	4.77e-05	0.00707007	1.92798	MYO6	34	-4.51021	4.2e-05	0.00599112
TRIM22	-1.46749	0.0844419	-4.46099	5.05e-05	0.00720049	1.87607	TRIM22	47	-4.49738	4.39e-05	0.0061011
PAX9	2.19053	-0.524253	5.18052	3.85e-05	0.00642747	2.28269	PAX9	1	5.06722	4.6e-05	0.00631481
CARD11	-2.21239	-0.788053	-4.43636	5.47e-05	0.00742246	1.80207	CARD11	33	-4.46801	4.83e-05	0.00655709
CCDC134	0.819422	0.0847511	4.43249	5.54e-05	0.00742246	1.79045	CCDC134	24	4.45008	5.12e-05	0.00687178
MTUS2	-2.05269	0.138196	-4.50887	5.33e-05	0.00742246	1.85002	MTUS2	2	-4.50525	5.25e-05	0.00696053
C12orf75	-2.11152	-0.895152	-4.42908	5.6e-05	0.00742246	1.78022	C12orf75	3	-4.43659	5.36e-05	0.00701419
PTPN13	2.52969	-0.814353	4.41377	5.89e-05	0.00753359	1.73433	PTPN13	3	4.42859	5.5e-05	0.00703517
CCN2	-2.61426	-0.678915	-4.56454	5.6e-05	0.00742246	1.83033	CCN2	1	-4.56286	5.45e-05	0.00703517
FOXP1	-1.42268	0.254154	-4.42374	5.7e-05	0.00746396	1.7642	FOXP1	2	-4.38703	6.3e-05	0.00790083
RUNX3	-1.51244	-0.962762	-4.38518	6.46e-05	0.00799412	1.64879	RUNX3	5	-4.38624	6.32e-05	0.00790083
LILRB4	-2.75202	-0.182202	-4.35166	7.21e-05	0.00862781	1.54875	LILRB4	3	-4.36918	6.68e-05	0.00826117
SEPTIN6	-0.815973	-0.0617229	-4.29871	8.56e-05	0.00945886	1.39136	SEPTIN6	94	-4.36176	6.84e-05	0.00837082
HLA-E	-1.08122	-0.0517721	-4.32167	7.95e-05	0.00911736	1.45954	HLA-E	32	-4.35194	7.07e-05	0.00846621
ARL11	-1.93646	0.366546	-4.33863	7.52e-05	0.00881121	1.50995	ARL11	5	-4.35163	7.07e-05	0.00846621
ACTBL2	-0.435891	-0.094287	-4.40386	6.08e-05	0.00769277	1.70466	ACTBL2	17	-4.33267	7.53e-05	0.00891018
IGF2BP3	2.30519	0.00110875	4.28666	8.9e-05	0.00971107	1.35565	IGF2BP3	81	4.32075	7.82e-05	0.00916516
SRPK3	1.8851	0.217769	4.47538	7.33e-05	0.00867585	1.58341	SRPK3	1	4.43803	7.95e-05	0.00921774
MLLT1	0.474891	0.0824364	4.32348	7.9e-05	0.00911736	1.46489	MLLT1	23	4.31071	8.08e-05	0.0092744
UACA	2.24125	0.407664	4.27359	9.28e-05	0.0100313	1.31698	UACA	12	4.29812	8.42e-05	0.00948906
BTN3A3	1.24137	0.112088	4.30264	8.45e-05	0.00945886	1.40303	BTN3A3	6	4.29739	8.44e-05	0.00948906
CRTC1	0.745189	0.334625	4.3029	8.44e-05	0.00945886	1.4038	CRTC1	11	4.2753	9.07e-05	0.0100249
POLR1D	0.609862	0.0768784	4.24784	0.000100872	0.0106924	1.2409	POLR1D	31	4.27429	9.1e-05	0.0100249
ZNF565	1.51144	-0.0136685	4.57308	6.79e-05	0.00821404	1.67741	ZNF565	1	4.44158	9.56e-05	0.0102618
JMY	1.47406	-0.0536314	4.2322	0.00010608	0.0110343	1.1948	JMY	23	4.25805	9.59e-05	0.0102618
MAP7D3	-0.900658	-0.0920968	-4.22656	0.000108025	0.0111325	1.17816	MAP7D3	40	-4.26278	9.44e-05	0.0102618
SLC9A7	-1.52037	0.176274	-4.23836	0.000103999	0.0109199	1.21294	SLC9A7	8	-4.25084	9.82e-05	0.0104039
IGF2BP2	-3.82716	-1.06691	-4.2168	0.000111464	0.0113816	1.14947	IGF2BP2	2	-4.23851	0.000102143	0.0107251
CYFIP2	-0.802601	0.0755328	-4.15097	0.000137639	0.0131335	0.95644	CYFIP2	176	-4.22124	0.000108	0.011234
GMFG	-0.750388	0.0658471	-4.14981	0.000138147	0.0131335	0.953064	GMFG	109	-4.21724	0.000109404	0.0112747
FBXW11	-0.532914	-0.0533247	-4.29784	8.58e-05	0.00945886	1.38879	FBXW11	10	-4.20791	0.000112744	0.0115123
HLA-DMA	-3.42981	0.00725479	-4.18176	0.000124726	0.0123947	1.04657	HLA-DMA	2	-4.20144	0.000115121	0.0116481
NUDT16L1	-0.513798	0.0153142	-4.19335	0.00012018	0.0120505	1.08055	NUDT16L1	24	-4.19329	0.000118181	0.0118501
HOOK3	-0.66793	-0.0713725	-4.10894	0.000157376	0.0141258	0.833897	HOOK3	119	-4.18699	0.000120599	0.0119846
BAZ2B	-1.59688	0.120104	-4.1447	0.000140421	0.0131335	0.938131	BAZ2B	22	-4.17033	0.000127234	0.0124407
CD33	-3.27718	-0.52171	-4.14857	0.000138699	0.0131335	0.949417	CD33	3	-4.16987	0.000127424	0.0124407
PGAP1	2.3074	-0.200117	4.19322	0.000134147	0.013097	1.01049	PGAP1	2	4.19367	0.000131362	0.0127136
IRAK2	1.66664	0.199637	4.25211	0.000118882	0.0120287	1.12124	IRAK2	1	4.20438	0.000134879	0.0127221
ARHGEF7	-0.782322	0.198777	-4.09325	0.000165426	0.0146126	0.7883	ARHGEF7	100	-4.15412	0.000134031	0.0127221
NDRG4	-3.10129	-0.954214	-4.25087	0.000143327	0.0131838	0.974551	NDRG4	1	-4.26254	0.000134732	0.0127221
SSBP4	1.33659	-0.102966	4.35707	0.000100091	0.0106924	1.29691	SSBP4	1	4.24646	0.000136032	0.0127229
CMTR2	-0.465848	0.0241601	-4.16788	0.000130395	0.0128433	1.0059	CMTR2	17	-4.12088	0.000149089	0.013828
PUS7	1.08899	0.0178898	4.06248	0.000182391	0.0151493	0.699093	PUS7	98	4.10713	0.000155786	0.0141401
NTHL1	1.06943	0.19838	4.08268	0.000171072	0.0149825	0.757631	NTHL1	24	4.10533	0.000156681	0.0141401
CD3EAP	0.791507	0.171625	4.07857	0.00017332	0.0149825	0.745699	CD3EAP	30	4.10438	0.000157156	0.0141401
AC005747.1	-1.7426	-0.347704	-4.07553	0.000174998	0.0149825	0.736894	AC005747.1	29	-4.10363	0.000157536	0.0141401
PTPRE	-1.81239	0.344143	-4.0642	0.000181403	0.0151493	0.704055	PTPRE	52	-4.09597	0.000161435	0.0143742
PRKDC	0.535977	0.193162	3.95499	0.000255937	0.0188648	0.389873	PRKDC	1772	4.09077	0.000164131	0.0144983
DNM1	1.85485	0.334819	4.04106	0.000195188	0.0158572	0.637155	DNM1	28	4.0688	0.000176031	0.0150352
PKP4	1.11279	-0.0644089	4.04852	0.000190634	0.0156012	0.658713	PKP4	17	4.06475	0.000178315	0.0150352
ST3GAL4	1.01264	-0.378773	4.0964	0.000163777	0.0145827	0.797454	ST3GAL4	5	4.07124	0.000174671	0.0150352
QTRT1	0.497609	0.195688	4.02437	0.000205754	0.0162414	0.589019	QTRT1	40	4.07042	0.000175128	0.0150352
EAF2	-1.07451	-0.0549068	-4.14113	0.000142031	0.0131733	0.92771	EAF2	2	-4.07371	0.000173301	0.0150352
DYSF	-3.67739	-1.43288	-4.03863	0.000196688	0.0158633	0.630164	DYSF	12	-4.06554	0.000177865	0.0150352
COCH	1.62708	-0.132127	4.07758	0.000173865	0.0149825	0.74283	COCH	1	4.04572	0.000189428	0.0158521
DBNL	-0.933528	0.0546708	-3.98833	0.000230497	0.0174519	0.485374	DBNL	109	-4.03834	0.00019392	0.0159922
INPP5D	-1.6144	0.214133	-4.00039	0.000221912	0.0172719	0.520009	INPP5D	208	-4.03825	0.000193976	0.0159922
CCDC61	-0.666778	-0.119017	-4.05548	0.00018648	0.0153743	0.678836	CCDC61	13	-4.03296	0.000197258	0.0160254
POTEF	-0.520678	-0.0997441	-4.12689	0.000148629	0.0134491	0.886182	POTEF	9	-4.03465	0.000196202	0.0160254
GALK2	0.81824	0.0487579	3.99439	0.000226146	0.0174227	0.502761	GALK2	36	4.0259	0.000201719	0.0161282
ARRDC1	-0.738971	0.084863	-4.06828	0.00017907	0.0151493	0.715881	ARRDC1	7	-4.0241	0.000202871	0.0161282
COL18A1	-2.89264	-0.463197	-4.69943	0.000202604	0.0162229	0.811153	COL18A1	1	-4.65717	0.000201494	0.0161282
DPT	3.11174	0.229188	4.26256	0.000205515	0.0162414	0.590099	DPT	1	4.23195	0.000214814	0.0169439
PRDM4	0.566857	-0.088854	4.55319	3.73e-05	0.00642747	2.15443	PRDM4	1	4.00403	0.000216175	0.0169439
COBLL1	2.64003	-0.263527	4.13506	0.00022771	0.0174227	0.577812	COBLL1	1	4.13298	0.00022266	0.0172224
CHMP3	-0.800601	-0.0381158	-4.13405	0.000145277	0.0132535	0.907042	CHMP3	2	-3.99445	0.000222823	0.0172224
SEMA3A	1.89993	-0.00570256	4.10576	0.000228546	0.0174227	0.554647	SEMA3A	2	4.0991	0.000227204	0.0172251
LMCD1	1.80215	-0.581101	4.01094	0.000214655	0.0168247	0.550356	LMCD1	1	3.99204	0.000224524	0.0172251
UXS1	-1.17899	0.154729	-3.96515	0.000247908	0.0185106	0.418943	UXS1	23	-3.98787	0.000227501	0.0172251
CCDC50	-0.796409	-0.0417324	-3.9426	0.000266068	0.0194825	0.354474	CCDC50	46	-3.98096	0.000232513	0.0174856
SRSF9	0.349583	0.0276611	3.77905	0.000442012	0.02635	-0.107608	SRSF9	165	3.97242	0.000238865	0.0178427
TERF2	-0.502385	0.188178	-3.87732	0.000326175	0.0224095	0.168879	TERF2	55	-3.94059	0.000264019	0.0195902
IKZF2	-1.88287	-0.479457	-3.90348	0.00030066	0.0210462	0.243073	IKZF2	30	-3.93078	0.000272283	0.0200696
RAB32	-1.09939	-1.30761	-3.93683	0.000270912	0.0197075	0.338025	RAB32	5	-3.92377	0.000278329	0.0202471
TOX2	-2.20135	-1.04272	-4.01372	0.000288389	0.0205754	0.337625	TOX2	2	-4.01984	0.000276863	0.0202471
LGALS8	-1.33971	-0.180867	-3.89891	0.000304973	0.0212147	0.230097	LGALS8	11	-3.91307	0.000287829	0.0208022
ERP29	-0.803591	0.0762946	-3.8233	0.000385643	0.0248105	0.0164428	ERP29	181	-3.88248	0.00031672	0.0227426
PEX6	0.695229	0.0414383	3.87519	0.000328337	0.0224196	0.162863	PEX6	19	3.87972	0.000319457	0.022792
MICAL3	-0.964749	0.152164	-3.83573	0.000371097	0.0244397	0.0514239	MICAL3	78	-3.87723	0.00032195	0.0228236
DDB2	-0.946503	0.0370734	-3.83611	0.000370655	0.0244397	0.0525105	DDB2	22	-3.85468	0.000345383	0.0243298
TSEN54	0.500574	-0.02117	3.81501	0.000395648	0.0251632	-0.0068544	TSEN54	36	3.84933	0.000351187	0.0244295
CHFR	-1.78314	-0.319219	-3.83292	0.00037433	0.0245076	0.0435328	CHFR	7	-3.84947	0.000351027	0.0244295
TMEM19	-0.951454	0.0727961	-4.30534	0.000139488	0.0131335	1.01731	TMEM19	1	-3.96901	0.000356478	0.0246435
SNCB	-3.22477	-0.378246	-3.90404	0.000384854	0.0248105	0.0845354	SNCB	1	-3.91717	0.000362908	0.0249331
ADAM22	0.91343	-0.192745	3.84111	0.000364958	0.0243233	0.066604	ADAM22	8	3.83224	0.000370334	0.0252872
AC118549.1	0.365833	0.109756	3.78609	0.000432542	0.026236	-0.087922	AC118549.1	36	3.82617	0.000377382	0.0256113
SLC22A8	-1.94137	-0.167039	-4.13145	0.000277824	0.0200764	0.335249	SLC22A8	1	-4.00216	0.000383067	0.0258396
DUSP19	1.1939	0.241818	3.88464	0.000318828	0.0220407	0.189629	DUSP19	1	3.81597	0.000389506	0.0261156
CYB5D2	1.30436	0.0693091	4.07265	0.000296685	0.0208994	0.341225	CYB5D2	1	3.96238	0.000392383	0.026151
ZNF239	2.74411	0.345667	4.37834	0.00035706	0.0241473	0.18222	ZNF239	1	4.28174	0.00041137	0.0262334
DLL1	2.11931	0.130211	3.83595	0.00042234	0.026236	-0.0450338	DLL1	1	3.83249	0.000419917	0.0262334
ACCS	2.08552	-0.267371	3.79061	0.000426564	0.026236	-0.0752702	ACCS	1	3.78751	0.000425356	0.0262334
FOXO3	1.27221	0.161761	3.79901	0.00041567	0.0261379	-0.0517499	FOXO3	5	3.79835	0.000411338	0.0262334
SLC17A9	1.03565	0.299854	4.12263	0.000246455	0.0185106	0.503726	SLC17A9	1	3.92795	0.000415713	0.0262334
CDK6	0.925146	-0.279681	3.74812	0.000486052	0.0280298	-0.193907	CDK6	103	3.79246	0.0004189	0.0262334
TMEM94	0.680175	0.0937158	3.81826	0.000391686	0.0250544	0.00230037	TMEM94	13	3.80411	0.000404073	0.0262334
WDR60	0.671884	0.0964305	3.78252	0.00043732	0.0263101	-0.0979085	WDR60	30	3.80588	0.000401868	0.0262334
INTS13	0.317512	0.0750976	3.64314	0.000669171	0.0335354	-0.483979	INTS13	92	3.80318	0.000405242	0.0262334
CERS2	0.481319	0.0237078	3.8454	0.000360149	0.0241473	0.0786767	CERS2	14	3.79712	0.00041291	0.0262334
WDR74	0.534877	0.0672514	3.74146	0.000496068	0.028314	-0.212432	WDR74	45	3.78655	0.000426616	0.0262334
RHOU	-0.989358	-0.785571	-4.0632	0.000249469	0.0185106	0.469549	RHOU	1	-3.87954	0.000417469	0.0262334
HELZ2	-1.24068	-0.776334	-3.79631	0.000419132	0.0262076	-0.0592922	HELZ2	9	-3.80603	0.00040168	0.0262334
TCL1A	-2.47341	0.420748	-3.759	0.000470096	0.0273935	-0.163584	TCL1A	50	-3.78688	0.000426181	0.0262334
ZFP82	-1.11339	-0.0436192	-3.77853	0.000442718	0.02635	-0.109059	ZFP82	9	-3.78427	0.000429634	0.0262738
EPS8	1.83495	-0.308194	3.76793	0.000457387	0.0270783	-0.138683	EPS8	5	3.78169	0.000433068	0.0262772
C8orf76	0.920614	-0.044565	3.91441	0.000290578	0.0205996	0.274152	C8orf76	1	3.78069	0.000434413	0.0262772
ZRANB3	0.607882	-0.105074	3.75266	0.000479322	0.0277857	-0.181241	ZRANB3	32	3.77832	0.000437598	0.0263268
ASB1	-0.65637	-0.209844	-3.847	0.000358366	0.0241473	0.0831934	ASB1	5	-3.76953	0.000449619	0.0267607
CASZ1	-1.41864	-0.147871	-3.78726	0.000430984	0.026236	-0.0846426	CASZ1	2	-3.77093	0.000447694	0.0267607
TTC7A	-0.69029	0.148639	-3.71983	0.000529993	0.029451	-0.272495	TTC7A	51	-3.76079	0.000461898	0.0273453
TRA2A	0.359863	0.0615995	3.70274	0.000558365	0.0304637	-0.319825	TRA2A	41	3.75811	0.000465719	0.0274257
HIP1R	-1.49585	-0.0161031	-3.72157	0.000527185	0.029451	-0.267673	HIP1R	92	-3.75419	0.000471373	0.0276125
MOCS1	1.92256	-1.21341	3.80434	0.000464147	0.0272337	-0.116677	MOCS1	1	3.7905	0.00047621	0.0277498
DAAM1	-1.41839	0.0138873	-3.71868	0.000531865	0.029451	-0.275696	DAAM1	56	-3.74917	0.000478705	0.0277499
PRDM2	-0.745594	0.327619	-3.69948	0.000563938	0.0306177	-0.328836	PRDM2	34	-3.72703	0.000512394	0.0295489
KCNK5	1.36536	-0.877608	3.87345	0.000433731	0.026236	-0.0332774	KCNK5	1	3.80431	0.000519303	0.0296402
SETDB2	-1.18658	0.288153	-3.71586	0.000536465	0.0295587	-0.283513	SETDB2	8	-3.72276	0.000519145	0.0296402
LSP1	-2.13581	-0.902528	-3.69007	0.000580329	0.0310532	-0.354831	LSP1	102	-3.71948	0.000524394	0.0297781
POM121C	0.608796	0.0857316	3.80563	0.000407264	0.0257548	-0.0331729	POM121C	5	3.71538	0.000531016	0.0299671
ZMPSTE24	0.400119	0.0114259	3.60867	0.000742602	0.0352036	-0.578292	ZMPSTE24	91	3.7141	0.000533108	0.0299671
TMEM128	1.01638	-0.239231	3.74237	0.000494691	0.028314	-0.209908	TMEM128	3	3.70747	0.000544034	0.0302826
SHPRH	0.340809	-0.0715927	3.595	0.000773784	0.0356675	-0.615528	SHPRH	70	3.7074	0.000544161	0.0302826
EHBP1	0.763009	-0.0707033	3.65986	0.000636119	0.0329794	-0.438069	EHBP1	70	3.70369	0.000550367	0.0303247
GUCY1B1	-1.34849	-0.377219	-3.69028	0.000579969	0.0310532	-0.354267	GUCY1B1	11	-3.70516	0.00054789	0.0303247
POLR1E	0.655308	0.187768	3.65589	0.000643835	0.0331754	-0.448998	POLR1E	57	3.7004	0.000555923	0.030371
MTMR10	-0.990115	-0.00304711	-3.67219	0.000612763	0.0323225	-0.404153	MTMR10	36	-3.69997	0.000556664	0.030371
TNFAIP8	-1.41487	-0.525756	-3.67735	0.000603231	0.0319713	-0.389937	TNFAIP8	16	-3.69708	0.000561602	0.0304909
MED20	-0.40476	0.0209371	-3.7292	0.000515034	0.0292466	-0.246503	MED20	18	-3.6898	0.000574227	0.031025
ANKRD46	0.784595	-0.153606	3.76262	0.000464906	0.0272337	-0.153498	ANKRD46	3	3.68619	0.000580586	0.031217
RARG	1.51268	-0.000261201	4.54874	0.00027959	0.0200764	0.489607	RARG	1	4.16509	0.000594084	0.031545
DMXL2	1.09027	-0.145644	3.64773	0.000659936	0.0333649	-0.471386	DMXL2	46	3.67805	0.000595188	0.031545
MED18	-0.380564	0.0546813	-3.68634	0.000586958	0.0312576	-0.365133	MED18	25	-3.68054	0.000590686	0.031545
RAVER2	1.1407	0.231309	3.65937	0.000637069	0.0329794	-0.439422	RAVER2	15	3.67465	0.000601393	0.0316903
PABPC4	0.559324	-0.0781513	3.60554	0.000749619	0.0352036	-0.586807	PABPC4	93	3.67189	0.000606471	0.0316903
LIG4	-1.05921	-0.125877	-3.64031	0.000674926	0.0335354	-0.49174	LIG4	55	-3.67281	0.00060478	0.0316903
ZMAT3	-1.87049	0.232414	-3.64865	0.000658114	0.0333649	-0.468881	ZMAT3	11	-3.66889	0.000612032	0.0318314
MYO1G	-1.1715	-0.420209	-3.62191	0.000713525	0.0342329	-0.542121	MYO1G	147	-3.65949	0.000629808	0.0326036
PPP2R5A	-0.870601	0.038045	-3.62964	0.000697051	0.0340271	-0.520962	PPP2R5A	36	-3.65753	0.000633577	0.0326468
IRAK3	1.90022	0.178319	3.6217	0.000713973	0.0342329	-0.54269	IRAK3	14	3.64333	0.000661516	0.0339294
ZNF3	0.722414	0.0963266	3.63801	0.000679637	0.0336194	-0.498042	ZNF3	15	3.63767	0.000672959	0.0340456
RTN4IP1	-0.739395	0.166851	-3.63255	0.000690956	0.0340271	-0.513007	RTN4IP1	18	-3.6398	0.000668623	0.0340456
JAK2	-1.23817	0.168324	-3.62077	0.00071598	0.0342329	-0.545233	JAK2	16	-3.63851	0.000671249	0.0340456
MAGI3	1.1888	-0.00168597	3.60576	0.000749127	0.0352036	-0.586213	MAGI3	23	3.62736	0.000694346	0.0343985
EHBP1L1	0.780058	0.168871	3.57884	0.000812292	0.0361633	-0.659479	EHBP1L1	126	3.62845	0.000692049	0.0343985
WDR90	-0.830936	-0.169654	-3.72225	0.000526095	0.029451	-0.265795	WDR90	2	-3.63248	0.000683647	0.0343985
PLEKHO1	-1.1575	-0.115062	-3.60266	0.000756161	0.0353617	-0.594674	PLEKHO1	29	-3.62686	0.000695388	0.0343985
ZNF75A	-1.59717	-0.240611	-3.68139	0.000654253	0.0333649	-0.447031	ZNF75A	1	-3.65838	0.00069101	0.0343985
RABEP2	-0.536536	0.204843	-3.56088	0.000857243	0.037125	-0.708199	RABEP2	77	-3.62286	0.00070386	0.0346635
PHOX2B	-0.899813	0.020236	-4.44858	0.000181975	0.0151493	0.852124	PHOX2B	1	-3.8836	0.000715115	0.0350627
TMEM201	0.516324	0.0831408	3.62361	0.000709867	0.0342329	-0.537465	TMEM201	19	3.6154	0.00071995	0.035145
TMEM258	-0.709526	-0.140788	-3.82979	0.000377979	0.0246018	0.0347068	TMEM258	1	-3.61135	0.000728814	0.0351485
FTO	0.395605	0.114368	3.50543	0.0010115	0.0399221	-0.857734	FTO	102	3.61104	0.000729498	0.0351485
ZBED1	-0.876341	0.092666	-3.59289	0.000778724	0.0356675	-0.621289	ZBED1	25	-3.61282	0.00072558	0.0351485
AFF1	0.869991	0.147747	3.58798	0.000790293	0.0357559	-0.634634	AFF1	27	3.60946	0.000732985	0.0351643
FBXL3	-0.473995	-0.0406606	-3.66886	0.000618983	0.0324966	-0.413312	FBXL3	10	-3.5999	0.000754476	0.0351918
NUBP2	-0.36213	0.0585756	-3.54488	0.000899278	0.0382021	-0.751481	NUBP2	41	-3.59523	0.000765177	0.0351918
AASDHPPT	0.449276	-0.0479353	3.54034	0.000911567	0.038363	-0.763751	AASDHPPT	57	3.60153	0.000750768	0.0351918
MLEC	0.472103	0.0925109	3.50978	0.000998512	0.0397348	-0.84606	MLEC	125	3.59767	0.000759561	0.0351918
ELMO1	-0.885316	-0.062673	-3.55521	0.000871919	0.0371819	-0.72355	ELMO1	154	-3.60047	0.000753181	0.0351918
PIGA	-1.065	-0.305534	-3.59367	0.000776894	0.0356675	-0.619159	PIGA	9	-3.59936	0.00075571	0.0351918
MYADM	-1.19166	0.127491	-3.69727	0.000624186	0.0326159	-0.404301	MYADM	1	-3.63308	0.000744764	0.0351918
BACH2	-1.50945	0.339614	-3.57952	0.000810639	0.0361633	-0.657635	BACH2	33	-3.60508	0.000742764	0.0351918
NKD2	-1.59011	-0.398799	-3.58895	0.000788002	0.0357559	-0.632007	NKD2	4	-3.59642	0.000762428	0.0351918
GUCY1A1	-1.75516	-0.100012	-3.58191	0.00080485	0.0361372	-0.651151	GUCY1A1	10	-3.60073	0.00075259	0.0351918
FEN1	-0.434486	0.0252323	-3.47814	0.00109683	0.0416224	-0.93084	FEN1	215	-3.59164	0.000773519	0.0353981
ARHGEF16	-2.13393	-0.466365	-3.90195	0.000759349	0.0353621	-0.421902	ARHGEF16	1	-3.87529	0.000776023	0.0353981
KCTD3	1.37756	0.217798	3.5729	0.000826918	0.0362346	-0.675623	KCTD3	9	3.58661	0.000785336	0.0355317
AC022966.1	0.647539	0.0535777	3.53989	0.000912785	0.038363	-0.764958	AC022966.1	70	3.58746	0.000783315	0.0355317
CYFIP1	2.34917	0.322635	3.57385	0.000824553	0.0362346	-0.673033	CYFIP1	1	3.57936	0.000802687	0.0355604
LCP1	-0.677117	-0.148746	-3.50941	0.000999618	0.0397348	-0.84706	LCP1	1317	-3.58035	0.000800282	0.0355604
RPS27L	-0.769598	0.061258	-3.57309	0.000826434	0.0362346	-0.675093	RPS27L	17	-3.58048	0.000799984	0.0355604
TAF2	0.273408	0.0722762	3.48948	0.0010606	0.0408458	-0.900522	TAF2	46	3.57621	0.000810327	0.0355604
PBX2	0.421706	0.0726983	3.64105	0.00067342	0.0335354	-0.489715	PBX2	13	3.57572	0.000811531	0.0355604
SELENOO	-0.973137	0.00596128	-3.55671	0.00086802	0.0371579	-0.719496	SELENOO	23	-3.57619	0.000810372	0.0355604
PIGP	-1.1331	-0.40386	-3.64645	0.000662501	0.0333649	-0.474902	PIGP	1	-3.58389	0.000791799	0.0355604
FSD1L	-1.24146	-0.0419423	-3.55757	0.000865781	0.0371579	-0.717161	FSD1L	19	-3.57727	0.000807735	0.0355604
ATF7IP2	-1.47189	0.0655214	-3.56946	0.000835479	0.0364662	-0.68494	ATF7IP2	4	-3.57414	0.000815384	0.0355891
YEATS2	0.311135	0.0434115	3.475	0.00110709	0.0416224	-0.939238	YEATS2	57	3.57179	0.000821169	0.0357016
EXT2	0.537413	-0.0363488	3.62046	0.000716645	0.0342329	-0.546073	EXT2	9	3.56821	0.000830055	0.0359475
GRB2	-0.629892	-0.0435661	-3.49581	0.00104084	0.0403757	-0.883546	GRB2	99	-3.55104	0.000873998	0.0377039
KBTBD4	-0.50639	0.100864	-3.63102	0.000694162	0.0340271	-0.5172	KBTBD4	7	-3.54814	0.000881638	0.0377409
FAM126A	-0.821312	0.19606	-3.53876	0.000915872	0.038363	-0.768009	FAM126A	17	-3.54854	0.000880576	0.0377409
STK24	-0.577147	0.0950661	-3.51617	0.000979713	0.0397348	-0.828893	STK24	36	-3.54541	0.000888871	0.0379047
RAB15	0.530162	-0.00815213	3.59509	0.000773591	0.0356675	-0.615303	RAB15	9	3.54222	0.000897434	0.0379788
LRIG2	0.572924	0.0266307	3.57336	0.000825763	0.0362346	-0.674359	LRIG2	11	3.54257	0.000896488	0.0379788
LRP6	1.05912	0.177702	3.53284	0.000932219	0.0387391	-0.783998	LRP6	8	3.53692	0.000911779	0.0380079
CARMIL2	-0.800293	-0.250055	-3.49719	0.00103658	0.0403757	-0.879845	CARMIL2	75	-3.53718	0.000911068	0.0380079
PARP9	-0.973886	-0.0423203	-3.50642	0.00100855	0.0399221	-0.85509	PARP9	60	-3.53931	0.000905273	0.0380079
SIGLEC10	-2.42319	-0.20339	-3.55953	0.000936281	0.0387391	-0.772057	SIGLEC10	1	-3.56707	0.000904609	0.0380079
SSBP1	0.653976	0.0193101	3.47615	0.00110333	0.0416224	-0.936168	SSBP1	141	3.53408	0.000919558	0.0380114
WHAMM	-0.576961	0.0548642	-3.5881	0.000790028	0.0357559	-0.634331	WHAMM	7	-3.53192	0.000925524	0.0380114
TMEM62	-0.968101	0.219371	-3.56566	0.000845059	0.0367403	-0.695252	TMEM62	3	-3.53238	0.000924263	0.0380114
EFNB2	-2.97645	-0.458358	-3.51136	0.000993813	0.0397348	-0.8418	EFNB2	5	-3.53234	0.000924375	0.0380114
TEAD4	2.15387	0.284348	3.60008	0.000972103	0.0397348	-0.759415	TEAD4	1	3.5986	0.000959507	0.0385535
STING1	1.42079	-0.145032	3.5019	0.00102219	0.0400598	-0.867224	STING1	22	3.52388	0.000948069	0.0385535
TMEM164	1.35937	-0.250889	3.51423	0.000985372	0.0397348	-0.834095	TMEM164	5	3.52	0.000959129	0.0385535
ARID2	0.477758	0.103893	3.43974	0.00122863	0.0436889	-1.03318	ARID2	125	3.52195	0.000953537	0.0385535
ERCC8	0.526945	0.0638916	3.60797	0.000744169	0.0352036	-0.5802	ERCC8	6	3.52025	0.00095841	0.0385535
SPRY4	-1.97519	-0.490725	-3.52517	0.000953774	0.0393167	-0.804652	SPRY4	1	-3.52328	0.000949758	0.0385535
TEX30	-0.940915	-0.417029	-3.49572	0.00104113	0.0403757	-0.883803	TEX30	16	-3.5081	0.000993808	0.0397881
TPP2	-0.663888	0.0596828	-3.44151	0.00122225	0.0436889	-1.02849	TPP2	324	-3.50551	0.00100153	0.0399533
CMTM6	-0.845964	-0.00496787	-3.82434	0.000549982	0.0301542	-0.232833	CMTM6	1	-3.59337	0.00102619	0.040646
EHD2	-2.34013	-1.25077	-3.48556	0.001073	0.0410701	-0.911013	EHD2	2	-3.49783	0.00102471	0.040646
HINFP	0.543478	0.0894791	3.72211	0.00052632	0.029451	-0.266183	HINFP	2	3.49251	0.00104108	0.04096
SOX4	-0.906132	-0.0612504	-3.53213	0.000934173	0.0387391	-0.785889	SOX4	3	-3.49238	0.00104148	0.04096
IRF4	-1.17294	-0.209391	-3.4627	0.00114814	0.0421706	-0.972083	IRF4	45	-3.49038	0.00104769	0.041059
TTC38	-1.57735	-0.468626	-3.4853	0.0010738	0.0410701	-0.911689	TTC38	3	-3.48916	0.0010515	0.041064
SGCE	1.4783	-0.205642	3.59375	0.000964834	0.0396258	-0.757378	SGCE	1	3.55474	0.00105993	0.0412483
IRF5	-1.67846	-0.531415	-3.47228	0.00111604	0.0416224	-0.946503	IRF5	5	-3.48479	0.00106526	0.0413113
MAP3K6	0.954027	0.175562	3.57325	0.000916852	0.038363	-0.749435	MAP3K6	2	3.5116	0.00108283	0.041847
FURIN	0.951174	0.0842406	3.50981	0.000998407	0.0397348	-0.845965	FURIN	3	3.47685	0.00109071	0.0420054
TWIST1	1.88702	0.5893	3.78248	0.00101572	0.0399468	-0.674834	TWIST1	1	3.72869	0.0011132	0.0421744
CLEC2B	1.75519	0.247728	3.45842	0.00116273	0.042306	-0.98347	CLEC2B	6	3.47365	0.00110111	0.0421744
TMEM87A	0.866285	-0.0145639	3.44946	0.00119392	0.0430044	-1.00735	TMEM87A	27	3.47037	0.00111188	0.0421744
DHX33	0.616882	0.0390032	3.42936	0.00126674	0.0444759	-1.06071	DHX33	48	3.46629	0.00112541	0.0421744
AKNA	-0.750968	-0.192752	-3.43484	0.00124649	0.0439033	-1.04619	AKNA	53	-3.46962	0.00111435	0.0421744
TALDO1	-0.473824	0.079308	-3.37309	0.00149389	0.0495643	-1.20921	TALDO1	268	-3.46842	0.00111835	0.0421744
NECTIN1	-1.84493	-0.0358192	-3.4505	0.00119026	0.0430044	-1.00458	NECTIN1	6	-3.46662	0.00112434	0.0421744
KCNA3	-2.03729	-0.59856	-3.45831	0.00116313	0.042306	-0.983784	KCNA3	3	-3.47061	0.00111109	0.0421744
GSDMB	-2.16558	-1.31092	-3.56094	0.00114328	0.0421347	-0.873536	GSDMB	1	-3.55536	0.00113995	0.042576
ARMCX2	1.87737	0.269227	3.54501	0.00113382	0.0419249	-0.898383	ARMCX2	1	3.53398	0.0011503	0.0426763
IL1RN	1.81751	0.5024	3.5488	0.0011219	0.0416224	-0.888844	IL1RN	1	3.53471	0.00114795	0.0426763
AKT3	1.26119	-0.0239408	3.44066	0.00122532	0.0436889	-1.03074	AKT3	13	3.45625	0.00115941	0.0428714
GTF3A	0.882602	-0.0565277	3.43491	0.00124624	0.0439033	-1.046	GTF3A	20	3.45035	0.00117986	0.0430553
BTAF1	-0.358018	-0.0358531	-3.33241	0.00168163	0.0517402	-1.31564	BTAF1	128	-3.45231	0.00117302	0.0430553
RABL3	0.481687	0.0653801	3.46161	0.00115183	0.0421706	-0.974979	RABL3	19	3.45221	0.00117339	0.0430553
POMGNT1	0.510015	-0.0811885	3.49159	0.00105396	0.040731	-0.894852	POMGNT1	11	3.45056	0.00117912	0.0430553
APLP2	0.866772	-0.321651	3.4399	0.00122803	0.0436889	-1.03274	APLP2	15	3.44893	0.00118483	0.0430954
FERMT3	0.430061	0.272573	3.33584	0.001665	0.0517402	-1.30671	FERMT3	269	3.44388	0.00120264	0.0435563
MGAT4A	-1.37329	-0.44905	-3.47112	0.00111988	0.0416224	-0.949605	MGAT4A	1	-3.44313	0.00120533	0.0435563
FAAP24	-0.822021	-0.0149843	-3.61101	0.000805213	0.0361372	-0.635412	FAAP24	1	-3.46306	0.001225	0.0441239
TEAD3	1.98285	0.285512	3.75325	0.00109048	0.0415652	-0.734906	TEAD3	1	3.68013	0.00125402	0.0447348
SCAPER	0.472913	-0.0245302	3.3924	0.00141192	0.0482006	-1.15843	SCAPER	43	3.43188	0.00124607	0.0447348
EIF3J	0.557719	-0.0113279	3.36251	0.00154073	0.0504362	-1.23698	EIF3J	164	3.43041	0.00125146	0.0447348
TRAF3IP1	-0.772199	0.15764	-3.41721	0.00131284	0.0456622	-1.09291	TRAF3IP1	11	-3.41415	0.00131292	0.0464315
RHBDD1	-0.519073	-0.204291	-3.65128	0.000652887	0.0333649	-0.461654	RHBDD1	2	-3.4137	0.00131466	0.0464315
INTS14	0.35822	0.0978146	3.35694	0.0015659	0.0504501	-1.25155	INTS14	48	3.41599	0.00130582	0.0464315
BCHE	-1.87979	-1.60254	-3.40231	0.00137149	0.0474058	-1.13227	BCHE	3	-3.41277	0.00131827	0.0464315
SCD5	1.16706	-0.0199893	3.3922	0.00141271	0.0482006	-1.15894	SCD5	18	3.41025	0.0013281	0.0464834
ZEB1	-0.978682	-0.548435	-3.38616	0.00143792	0.0482006	-1.17485	ZEB1	34	-3.41081	0.0013259	0.0464834
SEPTIN1	-0.994467	-0.369141	-3.37152	0.00150073	0.0495643	-1.21332	SEPTIN1	118	-3.4075	0.00133889	0.0466398
SLC25A15	-1.25875	0.0100851	-3.38516	0.00144212	0.0482006	-1.17748	SLC25A15	25	-3.40697	0.00134095	0.0466398
CHMP2A	-0.413006	0.0108632	-3.3612	0.00154658	0.0504501	-1.24039	CHMP2A	43	-3.40472	0.00134987	0.0468038
ZNF224	1.14016	0.0836129	3.53307	0.00111845	0.0416224	-0.895167	ZNF224	1	3.45456	0.00137546	0.047543
NUMBL	1.12087	0.175315	3.39558	0.00139881	0.0482005	-1.15003	NUMBL	5	3.39428	0.0013919	0.0478145
TTC1	-0.456114	-0.0483604	-3.32409	0.00172274	0.0523881	-1.33733	TTC1	90	-3.39479	0.00138982	0.0478145
EPHB4	1.87953	0.43269	3.36397	0.00153415	0.050369	-1.23313	EPHB4	9	3.38266	0.0014402	0.0478489
FMNL2	1.81728	0.57044	3.35797	0.00156123	0.0504501	-1.24887	FMNL2	41	3.38272	0.00143992	0.0478489
SMAD1	1.65327	-0.131506	3.38646	0.00143667	0.0482006	-1.17407	SMAD1	2	3.38762	0.0014194	0.0478489
TNIP2	-0.754217	-0.136093	-3.37843	0.00147079	0.0490116	-1.19519	TNIP2	15	-3.38316	0.00143808	0.0478489
MPND	-0.75996	0.143332	-3.41219	0.00133234	0.0461959	-1.10619	MPND	6	-3.38911	0.0014132	0.0478489
CWF19L1	-0.786897	-0.123306	-3.34707	0.00161155	0.0510903	-1.27738	CWF19L1	73	-3.38422	0.0014336	0.0478489
SGPL1	-0.566542	-0.044625	-3.35313	0.0015834	0.0504963	-1.26154	SGPL1	44	-3.38807	0.0014175	0.0478489
PER2	-0.527665	0.0473547	-3.43564	0.00124355	0.0439033	-1.04406	PER2	9	-3.39079	0.00140623	0.0478489
ATXN7L3	0.419873	0.0560089	3.47214	0.00111652	0.0416224	-0.946893	ATXN7L3	9	3.38589	0.0014266	0.0478489
SNTB2	0.522088	0.100883	3.36686	0.00152128	0.0500943	-1.22556	SNTB2	30	3.38666	0.00142338	0.0478489
WRN	0.552604	-0.190657	3.33162	0.00168549	0.0517402	-1.3177	WRN	82	3.38515	0.0014297	0.0478489
PM20D2	0.993281	0.161707	3.34893	0.00160285	0.0509708	-1.27252	PM20D2	53	3.37824	0.00145897	0.0483285
NUDT19	1.67207	0.180452	3.35367	0.00158088	0.0504963	-1.26011	NUDT19	20	3.37521	0.00147196	0.0485051
CALU	0.607692	-0.0162841	3.31293	0.00177933	0.0531777	-1.36636	CALU	197	3.37398	0.00147726	0.0485051
CLEC2D	-1.77338	0.323947	-3.35996	0.00155222	0.0504501	-1.24366	CLEC2D	5	-3.37396	0.00147738	0.0485051
FCHSD1	-2.43513	-0.230544	-3.35368	0.00158086	0.0504963	-1.2601	FCHSD1	4	-3.37124	0.00148917	0.0487483
MDN1	0.718456	0.0221964	3.3161	0.00176307	0.0531777	-1.35812	MDN1	333	3.36992	0.00149492	0.0487931
PLEKHA1	1.63912	-0.325916	3.35861	0.0015583	0.0504501	-1.24718	PLEKHA1	4	3.36857	0.00150087	0.0488215
HSPA1L	1.10875	-0.102134	3.41987	0.00130261	0.0454485	-1.08587	HSPA1L	1	3.36773	0.00150456	0.0488215
MARCHF7	-0.61899	-0.224053	-3.42378	0.00128773	0.0450706	-1.07552	MARCHF7	5	-3.36468	0.00151804	0.0491156
PCGF3	0.716577	0.272181	3.3891	0.00142559	0.0482006	-1.1671	PCGF3	6	3.36114	0.0015338	0.049411
IGBP1	-0.383227	0.0372448	-3.29926	0.00185104	0.0548147	-1.40183	IGBP1	55	-3.36064	0.00153605	0.049411
ATP6V0A2	-0.509448	-0.0297591	-3.33154	0.00168592	0.0517402	-1.31793	ATP6V0A2	31	-3.35264	0.00157237	0.0503243
ZSWIM9	0.540959	0.161789	3.3725	0.00149644	0.0495643	-1.21075	ZSWIM9	13	3.35165	0.00157689	0.0503243
PIBF1	-0.460325	-0.0385024	-3.29081	0.00189669	0.0556997	-1.42369	PIBF1	72	-3.35112	0.00157936	0.0503243
ALKBH8	0.358963	0.0255547	3.33525	0.00166785	0.0517402	-1.30825	ALKBH8	30	3.35043	0.00158252	0.0503243
TBKBP1	1.18883	0.0917438	3.33457	0.00167115	0.0517402	-1.31002	TBKBP1	13	3.34919	0.00158825	0.0503623
FBXO41	-0.466814	0.12041	-3.3888	0.00142684	0.0482006	-1.16789	FBXO41	12	-3.34683	0.00159925	0.0504326
COMTD1	-0.951929	-0.0485534	-3.33463	0.00167087	0.0517402	-1.30987	COMTD1	15	-3.34667	0.00159998	0.0504326
PTRH2	0.597179	0.106523	3.32641	0.00171118	0.0521793	-1.33129	PTRH2	29	3.3458	0.00160406	0.0504326
NAA20	0.486218	0.0960429	3.32771	0.00170475	0.0521259	-1.3279	NAA20	27	3.34103	0.0016265	0.0509942
TMEM65	1.10023	0.146139	3.33122	0.00168748	0.0517402	-1.31876	TMEM65	9	3.34006	0.0016311	0.0509948
PDGFRB	1.60659	0.378653	3.31361	0.0017758	0.0531777	-1.36458	PDGFRB	28	3.33645	0.00164835	0.0512783
NEIL1	-2.51042	-0.242899	-3.31978	0.00174435	0.0529008	-1.34853	NEIL1	3	-3.33623	0.00164938	0.0512783
LDLRAP1	-1.50897	-0.0986266	-3.31417	0.00177292	0.0531777	-1.36312	LDLRAP1	19	-3.33469	0.00165681	0.0513657
CLCN2	1.52072	0.312589	3.87964	0.00118936	0.0430044	-0.749378	CLCN2	1	3.69835	0.00167084	0.0516567
CD3D	-0.592781	-1.14828	-3.33991	0.00164543	0.0517336	-1.29609	CD3D	13	-3.32727	0.00169296	0.0519812
APOBR	-1.44219	-0.78856	-3.30356	0.0018282	0.0544059	-1.39068	APOBR	32	-3.32695	0.00169451	0.0519812
JAK3	0.560445	-0.352279	3.29516	0.00187307	0.0551516	-1.41245	JAK3	40	3.32613	0.0016986	0.0519812
ZNF101	-0.745534	-0.313866	-3.38534	0.00144135	0.0482006	-1.177	ZNF101	3	-3.32584	0.00170001	0.0519812
ZSCAN25	0.366558	-0.134343	3.35641	0.00156835	0.0504501	-1.25296	ZSCAN25	17	3.31571	0.00175078	0.0533341
PRMT9	0.433601	-0.0364118	3.29731	0.00186148	0.0549557	-1.40688	PRMT9	30	3.31511	0.00175384	0.0533341
PPAT	0.677734	-0.0027832	3.26385	0.00204973	0.058496	-1.49328	PPAT	106	3.30925	0.00178389	0.05403
PAK2	-0.207066	0.07415	-3.02671	0.00399876	0.0861205	-2.08976	PAK2	169	-3.30876	0.00178644	0.05403
DEPTOR	-2.07205	0.53049	-3.35974	0.00178215	0.0531777	-1.27214	DEPTOR	1	-3.35222	0.00179798	0.0542316
L3MBTL3	0.500666	0.122286	3.26242	0.00205815	0.0585474	-1.49696	L3MBTL3	52	3.30496	0.00180621	0.0542516
CUL4A	-0.541323	-0.00496063	-3.24839	0.00214269	0.0606824	-1.53303	CUL4A	99	-3.30455	0.00180839	0.0542516
CC2D1A	-0.405845	-0.00472635	-3.23352	0.00223586	0.0620577	-1.57116	CC2D1A	75	-3.30361	0.00181332	0.0542532
SLCO4C1	1.62021	-0.885572	3.43305	0.00175667	0.0531298	-1.26641	SLCO4C1	1	3.40743	0.00184465	0.0550428
SBF2	1.43704	-0.0463901	3.28618	0.0019222	0.0560507	-1.43568	SBF2	5	3.29546	0.00185657	0.0552505
PPIC	2.23213	0.813279	3.35334	0.00192375	0.0560507	-1.37442	PPIC	1	3.35829	0.00187162	0.0554487
TBXAS1	1.60582	0.49866	3.27099	0.00200811	0.0577525	-1.47489	TBXAS1	19	3.29167	0.00187709	0.0554487
HS6ST2	2.56185	0.329174	3.30906	0.0019529	0.0567512	-1.41099	HS6ST2	1	3.31926	0.00187818	0.0554487
SH3TC1	-1.52686	-0.450242	-3.27735	0.00197172	0.0570962	-1.45849	SH3TC1	6	-3.29012	0.00188549	0.0555171
POLR3G	1.22729	-0.232359	3.27457	0.00198754	0.0573091	-1.46566	POLR3G	11	3.28828	0.00189557	0.0556669
XRCC4	-0.492103	-0.00454947	-3.24346	0.00217316	0.060925	-1.54568	XRCC4	48	-3.28322	0.00192345	0.0563368
LRBA	0.414814	-0.123054	3.18461	0.00256996	0.067781	-1.69576	LRBA	211	3.28139	0.00193368	0.0564879
ZNF146	0.529393	0.174704	3.34616	0.00161579	0.0510903	-1.27975	ZNF146	6	3.27974	0.00194291	0.0566087
CEP162	-0.662807	-0.0363662	-3.26176	0.00206205	0.0585474	-1.49865	CEP162	20	-3.27132	0.00199064	0.0578482
ZNF248	1.15236	-0.162598	3.48841	0.00143205	0.0482006	-1.04221	ZNF248	1	3.35618	0.00201023	0.0581069
LRPAP1	0.652032	-0.177333	3.24423	0.00216836	0.060925	-1.5437	LRPAP1	33	3.26758	0.00201222	0.0581069
OSTF1	-0.69799	-0.30624	-3.23995	0.00219509	0.0613854	-1.55468	OSTF1	39	-3.26707	0.00201521	0.0581069
ALG14	0.484874	-0.00606761	3.33389	0.00167444	0.0517402	-1.31179	ALG14	7	3.2655	0.00202432	0.0582189
STAMBPL1	-1.21343	-0.37901	-3.23709	0.00221315	0.0615808	-1.56201	STAMBPL1	29	-3.25918	0.0020615	0.0591352
PACSIN1	-2.61955	-1.71754	-3.22624	0.00228279	0.0630838	-1.58976	PACSIN1	18	-3.24818	0.00212776	0.060798
DLG3	0.672983	0.27276	3.22603	0.00228417	0.0630838	-1.5903	DLG3	30	3.2468	0.00213621	0.060798
LTB	-1.58531	-0.503924	-3.26746	0.00216312	0.060925	-1.52733	LTB	2	-3.2683	0.0021378	0.060798
SEPTIN7	-0.46355	-0.00822335	-3.16026	0.00275333	0.0709366	-1.75734	SEPTIN7	296	-3.24518	0.00214612	0.060798
PLXNC1	-1.22791	-0.642058	-3.2239	0.00229815	0.0633128	-1.59576	PLXNC1	26	-3.24508	0.00214678	0.060798
BAG2	0.989832	-0.12639	3.20997	0.00239123	0.0645467	-1.63129	BAG2	88	3.24153	0.00216874	0.0611757
HLA-DMB	-3.03868	0.175963	-3.4025	0.00233119	0.0639067	-1.43367	HLA-DMB	1	-3.42043	0.00217111	0.0611757
BSG	0.418514	0.070424	3.15525	0.0027926	0.0713405	-1.76999	BSG	147	3.24026	0.00217664	0.0611768
GRB10	1.23948	0.319424	3.21903	0.00233026	0.0639067	-1.60818	GRB10	19	3.23777	0.00219227	0.0614609
TBL2	0.513272	0.0736678	3.20645	0.00241532	0.0646214	-1.64026	TBL2	37	3.23444	0.0022133	0.0618946
CGN	1.23635	-0.10243	3.20702	0.0024114	0.0646214	-1.63881	CGN	36	3.23056	0.00223808	0.0624306
MYDGF	0.601524	0.028686	3.20925	0.00239614	0.0645467	-1.63313	MYDGF	30	3.22938	0.00224562	0.0624844
LMAN1	0.638828	-0.01483	3.17721	0.00262445	0.0680889	-1.71451	LMAN1	126	3.22504	0.00227369	0.0631076
FBXO9	0.964771	-0.179448	3.21676	0.00234539	0.064138	-1.61397	FBXO9	10	3.2237	0.00228242	0.0631719
NUS1	0.714671	-0.126202	3.24593	0.00215786	0.060925	-1.53935	NUS1	6	3.22295	0.00228736	0.0631719
TMEM161A	0.769903	-0.0142011	3.23818	0.00220626	0.061543	-1.55922	TMEM161A	6	3.22168	0.00229564	0.0632437
MBIP	0.450294	0.108291	3.21569	0.00235257	0.0641768	-1.61671	MBIP	23	3.21854	0.00231636	0.063657
ERMP1	-1.01282	0.185447	-3.1943	0.0025002	0.0664135	-1.67116	ERMP1	23	-3.21314	0.0023524	0.0644883
CD248	1.77479	0.400961	3.21073	0.00238606	0.0645467	-1.62936	CD248	1	3.20834	0.00238486	0.0652174
FAM107B	-1.23686	0.357144	-3.18182	0.00259036	0.0679535	-1.70283	FAM107B	42	-3.20618	0.00239965	0.065461
TRHDE	2.10907	0.532206	3.20733	0.00259481	0.0679535	-1.68737	TRHDE	13	3.23049	0.00241021	0.0655882
MARK1	1.86101	0.402131	3.24863	0.00255548	0.0677201	-1.62906	MARK1	3	3.26143	0.0024375	0.0661692
DDX47	0.46504	-0.0914991	3.14271	0.00289314	0.0731833	-1.80157	DDX47	80	3.19979	0.00244374	0.0661771
TRAV3	-4.24608	-4.12321	-3.19521	0.00258119	0.0679163	-1.56705	TRAV3	1	-3.20896	0.00246309	0.066383
OTC	-1.04152	0.282437	-4.13502	0.000992676	0.0397348	-0.555706	OTC	2	-3.64068	0.00246327	0.066383
TBC1D32	0.826344	-0.226989	3.40467	0.00163614	0.0515869	-1.23332	TBC1D32	1	3.24967	0.0024715	0.066444
SLC16A1	0.625018	0.0975194	3.15499	0.00279465	0.0713405	-1.77064	SLC16A1	62	3.19216	0.00249749	0.0669348
GABARAPL2	-0.70729	-0.0731058	-3.17738	0.00262319	0.0680889	-1.71408	GABARAPL2	20	-3.1889	0.00252075	0.0669348
HEXIM1	0.585793	-0.0264985	3.15667	0.00278145	0.0713405	-1.76642	HEXIM1	45	3.18836	0.00252462	0.0669348
L1CAM	1.70845	0.104212	3.25668	0.00266044	0.0688621	-1.60069	L1CAM	5	3.27012	0.00252963	0.0669348
CALCOCO2	-0.813211	0.0892256	-3.15382	0.00280387	0.071412	-1.77359	CALCOCO2	74	-3.18685	0.00253551	0.0669348
SH3BP5	-0.927972	-0.338551	-3.20136	0.00245054	0.0654066	-1.65321	SH3BP5	4	-3.18684	0.00253552	0.0669348
EPS8L2	-2.49199	-0.675091	-3.17061	0.00267393	0.0690506	-1.7312	EPS8L2	3	-3.18683	0.00253562	0.0669348
CYB5RL	0.996116	0.0994478	3.32088	0.00202157	0.0579899	-1.42741	CYB5RL	1	3.2316	0.00255257	0.0669348
ZBED8	0.630543	0.0984993	3.29912	0.00185178	0.0548147	-1.40219	ZBED8	2	3.18433	0.00255371	0.0669348
OTX1	2.08076	-0.726585	3.17954	0.00260717	0.0680724	-1.70861	OTX1	1	3.18428	0.00255407	0.0669348
CIAO2A	0.440865	0.211975	3.26475	0.00204441	0.0584944	-1.49096	CIAO2A	7	3.18403	0.00255591	0.0669348
NUDT7	-1.06873	0.229294	-3.17894	0.00261158	0.0680724	-1.71012	NUDT7	6	-3.18199	0.0025708	0.0671667
RECK	1.44781	0.513099	3.15568	0.00278925	0.0713405	-1.76892	RECK	11	3.17196	0.00264507	0.0689453
NPY	-3.98181	-0.725184	-3.31108	0.00281419	0.0714342	-1.58475	NPY	1	-3.32515	0.00265503	0.0690431
BBX	0.500649	0.136314	3.12299	0.00305811	0.0753026	-1.85104	BBX	57	3.16501	0.00269771	0.0698314
RAB11FIP1	-0.66767	-0.502052	-3.13344	0.00296962	0.0739416	-1.82485	RAB11FIP1	51	-3.16499	0.00269789	0.0698314
TMEM248	0.743563	-0.095788	3.21226	0.00237572	0.0644921	-1.62547	TMEM248	3	3.16307	0.00271258	0.0699331
SLC7A7	1.2902	0.107087	3.26477	0.00240093	0.0645467	-1.54872	SLC7A7	1	3.21424	0.00272131	0.0699331
ITSN1	0.853985	0.24907	3.13909	0.00292278	0.0736023	-1.81066	ITSN1	32	3.16113	0.00272754	0.0699331
PFN1	-0.374453	-0.0122435	-3.04592	0.00379184	0.0833652	-2.04254	PFN1	441	-3.16044	0.00273287	0.0699331
TIGAR	-0.944737	-0.084424	-3.13907	0.00292293	0.0736023	-1.81071	TIGAR	30	-3.16039	0.00273323	0.0699331
TRIM68	-0.587294	-0.0757763	-3.18518	0.00256582	0.067781	-1.69432	TRIM68	8	-3.15835	0.00274908	0.0701772
ARPC5L	-0.615523	-0.0110867	-3.13496	0.00295695	0.0739416	-1.82103	ARPC5L	33	-3.15754	0.00275544	0.0701785
DCUN1D5	0.593271	-0.0921275	3.13483	0.00295806	0.0739416	-1.82137	DCUN1D5	32	3.1565	0.00276355	0.0702243
VAMP8	-1.95806	-0.0194726	-3.12867	0.00300971	0.0747725	-1.83681	VAMP8	17	-3.14907	0.00282225	0.0715527
UBAP1	-0.44729	0.0411186	-3.12379	0.00305125	0.0753002	-1.84904	UBAP1	31	-3.14323	0.00286918	0.0725772
PIK3R5	-1.39489	-0.329339	-3.13689	0.00294093	0.0738885	-1.81619	PIK3R5	3	-3.13969	0.00289804	0.0731409
CUL5	0.397472	0.176753	3.05542	0.00369312	0.0827662	-2.01908	CUL5	127	3.13629	0.002926	0.0736796
VCPIP1	-0.392815	0.0567526	-3.05394	0.00370841	0.0828808	-2.02276	VCPIP1	123	-3.13521	0.00293486	0.0737359
LATS1	0.416284	-0.0588919	3.1521	0.00281757	0.0714342	-1.77794	LATS1	17	3.13268	0.00295591	0.0740975
ZNF451	0.399743	0.0874931	3.08098	0.00343962	0.0808839	-1.9558	ZNF451	52	3.12852	0.00299078	0.0746652
CSPG4	-2.85744	-1.48643	-3.18421	0.00315405	0.0774453	-1.77804	CSPG4	1	-3.19918	0.00299197	0.0746652
TBC1D13	-0.549561	0.0901667	-3.08803	0.00337267	0.0802091	-1.9383	TBC1D13	59	-3.12669	0.00300621	0.0748526
CASKIN2	1.03238	0.142815	3.10452	0.00322068	0.0782668	-1.89722	CASKIN2	25	3.124	0.0030291	0.0752542
ALDH2	-3.18167	-0.710622	-3.10307	0.00323376	0.0782754	-1.90083	ALDH2	4	-3.12224	0.00304417	0.0754602
YWHAH	-0.32353	0.0338221	-2.99181	0.00440222	0.0912415	-2.17509	YWHAH	238	-3.11913	0.00307086	0.0759527
KIAA0355	-0.66459	0.0355356	-3.12777	0.00301738	0.074796	-1.83908	KIAA0355	9	-3.1166	0.00309286	0.0763272
FLT3	1.27466	0.401045	3.09359	0.00332067	0.079222	-1.92446	FLT3	19	3.11211	0.00313215	0.0771204
CEBPA	1.44439	0.547888	3.12153	0.00328695	0.0790145	-1.89901	CEBPA	6	3.13521	0.00313886	0.0771204
COL19A1	-3.67692	-1.02564	-3.37632	0.00355677	0.0817911	-1.71887	COL19A1	1	-3.41048	0.00315838	0.077429
CHI3L2	-1.44863	-0.903831	-3.09641	0.00329464	0.0790289	-1.91745	CHI3L2	5	-3.10682	0.00317895	0.0775598
BST2	-1.08526	-0.620508	-3.09344	0.00332204	0.079222	-1.92483	BST2	13	-3.10673	0.00317976	0.0775598
IFNGR1	-0.679121	0.0240227	-3.10781	0.00319116	0.0780607	-1.88901	IFNGR1	12	-3.10542	0.00319148	0.0775598
ABHD4	1.1779	0.233925	3.10458	0.00322017	0.0782668	-1.89708	ABHD4	4	3.10541	0.00319159	0.0775598
DOCK7	0.962415	0.0801798	3.07333	0.00351371	0.081787	-1.97478	DOCK7	104	3.10424	0.00320208	0.0775852
PLCD1	-0.82564	0.0582728	-3.10292	0.0032351	0.0782754	-1.9012	PLCD1	9	-3.10374	0.00320658	0.0775852
IVNS1ABP	-0.670941	-0.189702	-3.08426	0.00340835	0.0806484	-1.94767	IVNS1ABP	28	-3.1027	0.00321594	0.077643
PAX6	2.21454	-0.210113	3.15044	0.00332405	0.079222	-1.86411	PAX6	1	3.15769	0.00322308	0.077647
CRYBG1	-1.21603	-0.507559	-3.07221	0.00352471	0.081787	-1.97756	CRYBG1	85	-3.09901	0.00324947	0.0778995
RSPRY1	-0.346499	0.0799153	-3.08357	0.00341486	0.0806484	-1.94937	RSPRY1	30	-3.09826	0.00325626	0.0778995
CAT	-0.813892	0.14731	-3.05945	0.00365209	0.0826174	-2.00915	CAT	211	-3.09786	0.00325989	0.0778995
BRD1	0.29959	0.127367	3.00685	0.00422393	0.0887024	-2.13841	BRD1	74	3.09768	0.00326156	0.0778995
CHN1	1.34373	-0.543554	3.10109	0.00325177	0.078508	-1.90578	CHN1	2	3.09656	0.00327182	0.0779772
CBR3	-1.85604	0.0124786	-3.06906	0.0035558	0.0817911	-1.98537	CBR3	17	-3.08893	0.00334245	0.0794902
SERPINH1	1.02368	0.231678	3.05719	0.00367509	0.0827662	-2.01473	SERPINH1	67	3.08442	0.00338497	0.0800023
CKAP2	-0.700348	-0.132662	-3.05123	0.00373639	0.083006	-2.02944	CKAP2	66	-3.08438	0.0033853	0.0800023
SMARCC1	0.444484	0.0136218	3.00898	0.00419919	0.088517	-2.13319	SMARCC1	210	3.08436	0.00338554	0.0800023
PARD3	1.00521	-0.300924	3.0562	0.00368518	0.0827662	-2.01717	PARD3	61	3.083	0.00339841	0.0801363
GCFC2	0.719505	-0.00575447	3.04911	0.00375838	0.0831627	-2.03466	GCFC2	44	3.07597	0.00346578	0.081552
GIGYF1	0.463058	0.137554	3.04709	0.00377947	0.0833652	-2.03964	GIGYF1	33	3.0692	0.00353194	0.0828093
REXO5	-1.21532	-0.491892	-3.07121	0.00353455	0.081787	-1.98004	REXO5	3	-3.06898	0.00353409	0.0828093
TCF7L2	1.6312	0.15678	3.05864	0.00366032	0.0826356	-2.01115	TCF7L2	3	3.06714	0.00355232	0.0829381
SGK3	-0.916563	0.0678711	-3.06174	0.00362892	0.0824284	-2.00349	SGK3	9	-3.06692	0.00355449	0.0829381
PPCDC	-0.76643	0.117648	-3.06617	0.00358444	0.0820881	-1.99251	PPCDC	10	-3.06617	0.00356194	0.0829382
ITGB5	1.13187	-0.0265641	3.06004	0.00364611	0.0826174	-2.00769	ITGB5	5	3.0635	0.0035885	0.083382
BAIAP2	-1.2873	-1.00521	-3.04281	0.00382462	0.0837912	-2.05019	BAIAP2	15	-3.0596	0.00362769	0.0839313
BCOR	-0.38575	0.0619117	-3.00262	0.00427341	0.0891145	-2.14874	BCOR	64	-3.05898	0.00363395	0.0839313
KXD1	-0.578701	-0.0227698	-3.09734	0.00328602	0.0790145	-1.91512	KXD1	6	-3.05881	0.00363567	0.0839313
ZNF226	0.528535	0.125475	3.21242	0.00237461	0.0644921	-1.62505	ZNF226	2	3.05742	0.00364983	0.0839313
POLM	-0.604799	-0.109988	-3.08317	0.00341866	0.0806484	-1.95036	POLM	7	-3.05742	0.00364984	0.0839313
DOCK10	-1.19927	0.0135325	-3.02657	0.00400039	0.0861205	-2.09012	DOCK10	166	-3.05497	0.00367473	0.0841207
DPYSL3	1.21678	0.279359	3.0632	0.00361425	0.0824284	-1.99988	DPYSL3	2	3.0538	0.00368672	0.0841207
ZNF212	0.592642	0.0359006	3.30753	0.00190438	0.0557784	-1.3948	ZNF212	1	3.06809	0.00368783	0.0841207
TRIM58	1.70394	0.255096	3.27392	0.00345192	0.0808839	-1.7645	TRIM58	1	3.23484	0.00368831	0.0841207
ARMC1	0.350334	0.103208	3.06194	0.00362692	0.0824284	-2.00299	ARMC1	22	3.05166	0.00370879	0.0844148
ASPHD2	-0.899193	0.172712	-3.07248	0.00352204	0.081787	-1.97688	ASPHD2	3	-3.0507	0.00371864	0.0844292
KLHL2	-0.918103	0.19276	-3.11142	0.00315905	0.0774453	-1.87999	KLHL2	1	-3.05013	0.0037246	0.0844292
AFF3	-1.47179	0.127215	-3.03258	0.0039344	0.0858625	-2.07535	AFF3	12	-3.04929	0.00373333	0.0844551
BBS4	-0.859682	-0.553278	-3.07026	0.0035439	0.0817911	-1.98239	BBS4	3	-3.04456	0.00378272	0.085384
NUDT12	1.75798	0.139318	3.03042	0.00395806	0.0858963	-2.08067	NUDT12	4	3.04306	0.00379844	0.085384
DPH6	0.666686	-0.139676	3.02993	0.00396342	0.0858963	-2.08188	DPH6	22	3.04282	0.00380098	0.085384
RFX7	0.357451	-0.0906138	3.01598	0.004119	0.0879931	-2.11607	RFX7	35	3.04238	0.00380562	0.085384
CNTRL	-0.640773	0.0451226	-2.99562	0.00435639	0.0904602	-2.16581	CNTRL	189	-3.04145	0.00381552	0.085384
RNPEPL1	-0.501414	0.0381801	-3.08007	0.00344838	0.0808839	-1.95807	RNPEPL1	8	-3.04099	0.00382042	0.085384
ATPSCKMT	0.991391	-0.11648	3.06315	0.00361469	0.0824284	-1.99999	ATPSCKMT	2	3.03832	0.00384883	0.0856887
BZW1	-0.372463	-0.122438	-2.95431	0.00487798	0.0963318	-2.26604	BZW1	136	-3.03826	0.00384945	0.0856887
ORAI2	-0.986061	-0.27675	-3.07585	0.00372327	0.0829871	-2.0103	ORAI2	3	-3.05887	0.00386798	0.0859294
ERGIC1	-0.8359	0.163877	-3.01263	0.00415717	0.0881319	-2.12426	ERGIC1	34	-3.03461	0.00388864	0.0860654
PCID2	-0.44433	-0.0407057	-2.984	0.0044976	0.0921884	-2.1941	PCID2	70	-3.03384	0.00389695	0.0860654
PDLIM1	-1.18575	0.286083	-3.00507	0.00424467	0.0889702	-2.14275	PDLIM1	205	-3.0338	0.0038973	0.0860654
TAF4B	1.35213	-0.116587	3.01752	0.0041016	0.0877899	-2.11231	TAF4B	6	3.02849	0.00395508	0.0871685
HNRNPH1	0.227998	0.040467	2.79457	0.00749269	0.121921	-2.64466	HNRNPH1	578	3.02726	0.0039686	0.0872863
PIAS4	0.32692	0.0432144	3.02851	0.003979	0.0859928	-2.08536	PIAS4	25	3.02596	0.00398288	0.0872863
POLR3H	0.473629	0.0583475	3.07159	0.00353082	0.081787	-1.9791	POLR3H	8	3.02587	0.00398396	0.0872863
PTP4A2	0.449056	-0.311113	3.05516	0.00369585	0.0827662	-2.01974	PTP4A2	12	3.02438	0.00400033	0.0874729
PTPRCAP	-1.10243	-0.733224	-3.02962	0.00396682	0.0858963	-2.08264	PTPRCAP	3	-3.02314	0.00401417	0.0876034
PGM2	0.56282	0.279545	2.96876	0.00468919	0.0938681	-2.23108	PGM2	200	3.02144	0.00403304	0.0878429
FAM160B1	-0.628366	-0.0779196	-2.98106	0.00453397	0.0925734	-2.20124	FAM160B1	72	-3.01686	0.00408441	0.0886752
KIRREL1	1.23631	0.120292	3.02382	0.00403084	0.0864661	-2.09686	KIRREL1	2	3.01625	0.00409131	0.0886752
PPP1R7	-0.302939	0.0363922	-2.89625	0.00571003	0.105569	-2.40532	PPP1R7	167	-3.01567	0.00409796	0.0886752
CRIM1	-1.7678	0.541195	-3.01439	0.00413704	0.0880407	-2.11996	CRIM1	1	-3.01477	0.00410811	0.0886752
RNF25	-0.373707	-0.0227364	-2.98708	0.00445982	0.0918633	-2.18662	RNF25	36	-3.01451	0.00411109	0.0886752
PLOD3	0.775057	0.133942	2.98663	0.00446523	0.0918633	-2.1877	PLOD3	48	3.01312	0.00412685	0.0887111
THRA	1.07361	0.0372538	3.04932	0.00375618	0.0831627	-2.03414	THRA	1	3.01291	0.00412928	0.0887111
SPATC1L	1.10227	0.164113	3.11028	0.00352983	0.081787	-1.89719	SPATC1L	1	3.04774	0.00413667	0.0887111
AKTIP	-0.573984	-0.0585472	-3.06673	0.00357894	0.0820881	-1.99114	AKTIP	4	-3.00484	0.00422225	0.0900203
ABHD17C	0.977481	0.219674	3.05203	0.00372808	0.0829871	-2.02746	ABHD17C	1	3.00386	0.00423367	0.0900203
CXorf38	-0.524286	-0.150743	-2.97543	0.0046045	0.0928406	-2.21492	CXorf38	40	-3.00293	0.00424464	0.0900203
TTC9C	-0.475264	0.0352943	-3.10462	0.0032198	0.0782668	-1.89697	TTC9C	4	-3.0025	0.00424961	0.0900203
ASMTL	-0.790842	-0.0769208	-2.9692	0.00468362	0.0938681	-2.23002	ASMTL	104	-3.00241	0.00425067	0.0900203
ZNF800	0.379473	0.168292	2.96661	0.00471687	0.0941631	-2.23629	ZNF800	42	3.00241	0.00425072	0.0900203
SMPD3	-1.62975	-0.860047	-3.02755	0.0041501	0.0881319	-2.04326	SMPD3	1	-3.01518	0.00426215	0.0900203
QRSL1	-0.504656	-0.0566837	-2.97595	0.00459783	0.0928406	-2.21364	QRSL1	37	-3.00141	0.00426242	0.0900203
RHOH	-1.3262	-0.630376	-3.00275	0.00427186	0.0891145	-2.14842	RHOH	2	-2.99932	0.00428707	0.0902464
CNN2	-1.82688	-0.529536	-2.97633	0.00459313	0.0928406	-2.21273	CNN2	36	-2.99778	0.00430526	0.0902464
RCSD1	-1.00696	0.451227	-2.9663	0.00472085	0.0941631	-2.23704	RCSD1	216	-2.99736	0.00431026	0.0902464
RYR3	-0.938424	-0.107787	-4.78773	0.000429977	0.026236	0.188953	RYR3	1	-3.46034	0.00431333	0.0902464
BET1	0.443392	0.189313	3.00784	0.00421242	0.0886281	-2.13599	BET1	17	2.99707	0.00431367	0.0902464
SORD	0.93771	0.280975	2.96492	0.00473865	0.0941807	-2.24037	SORD	93	2.99399	0.0043505	0.0906854
DNAJC11	0.449451	0.106046	2.94532	0.00499895	0.0976558	-2.28773	DNAJC11	72	2.99395	0.00435094	0.0906854
PCGF2	1.34741	-0.102941	2.98047	0.00454126	0.0925734	-2.20267	PCGF2	7	2.99285	0.00436409	0.0907893
LIPC	0.953398	0.0476634	3.17768	0.00342013	0.0806484	-1.86552	LIPC	1	3.07255	0.00441404	0.0916572
TADA2B	-0.325668	0.0423383	-3.04538	0.0037975	0.0833652	-2.04387	TADA2B	14	-2.98585	0.00444896	0.0919432
ZC3H6	0.654523	0.28404	2.98577	0.00447577	0.0919101	-2.18979	ZC3H6	13	2.98557	0.00445235	0.0919432
NDST1	-0.831654	0.0815637	-3.00243	0.00427557	0.0891145	-2.14919	NDST1	4	-2.98555	0.0044526	0.0919432
FKBP7	0.786752	0.0581767	2.97687	0.00458636	0.0928406	-2.21143	FKBP7	14	2.98463	0.00446395	0.0920069
ZNF267	-0.522659	0.029308	-3.01512	0.0041288	0.0880337	-2.11819	ZNF267	8	-2.98373	0.004475	0.0920643
ALOX5AP	1.22185	0.207732	2.98972	0.00442761	0.0915666	-2.18019	ALOX5AP	2	2.98221	0.00449367	0.0922779
GPAT4	0.564669	0.141118	2.978	0.00457213	0.0928406	-2.20867	GPAT4	16	2.97785	0.00454785	0.0932184
GNL3L	0.512285	-0.0638016	2.93775	0.00510298	0.0989347	-2.30596	GNL3L	60	2.9756	0.00457602	0.0935967
NCF1	-1.92875	-0.260102	-2.95404	0.00488151	0.0963318	-2.26668	NCF1	32	-2.97503	0.00458312	0.0935967
HMGB3	-0.584042	0.0341862	-2.94661	0.00498134	0.0976558	-2.28461	HMGB3	42	-2.97364	0.00460062	0.0936845
ACOT11	1.62169	-0.119211	3.04469	0.00454134	0.0925734	-2.13362	ACOT11	1	3.03501	0.00460426	0.0936845
COPRS	0.592949	-0.134276	3.04594	0.00379158	0.0833652	-2.04248	COPRS	3	2.97232	0.00461727	0.0937778
TSNARE1	-1.52773	-0.677214	-2.97584	0.00459928	0.0928406	-2.21392	TSNARE1	1	-2.96995	0.00464749	0.0942195
PIP4K2C	-1.65028	-0.924645	-2.94893	0.00494999	0.0973382	-2.27902	PIP4K2C	22	-2.96862	0.00466436	0.0943896
CSRP1	-1.09973	-0.318739	-2.94386	0.00501879	0.0976558	-2.29124	CSRP1	50	-2.96753	0.00467829	0.0944999
CCR7	-1.73217	-1.1886	-3.01034	0.00473813	0.0941807	-2.2083	CCR7	1	-3.0095	0.0047038	0.094843
WIPF2	0.566075	0.0552628	3.02372	0.00403198	0.0864661	-2.09711	WIPF2	4	2.96274	0.00474008	0.0952459
DNAJB6	0.560235	0.0219454	2.92883	0.0052281	0.100499	-2.32739	DNAJB6	57	2.96268	0.0047409	0.0952459
PPHLN1	-0.259325	-0.000857241	-2.90285	0.00560919	0.104573	-2.38958	PPHLN1	44	-2.95823	0.00479895	0.0961642
RPS6KA5	-0.928936	-0.0114218	-2.93716	0.00511118	0.0989347	-2.30738	RPS6KA5	32	-2.95786	0.00480389	0.0961642
LNPK	0.607279	0.147877	2.92366	0.00530196	0.101219	-2.33979	LNPK	55	2.95486	0.0048434	0.0966082
HELB	0.749839	-0.107807	2.94566	0.0049943	0.0976558	-2.28691	HELB	16	2.95486	0.00484343	0.0966082
SLC29A2	-2.11406	0.0992669	-2.96156	0.00501221	0.0976558	-2.25228	SLC29A2	1	-2.96792	0.00489337	0.0973724
NOTCH1	-0.578528	-0.464866	-2.92108	0.00533917	0.101755	-2.34598	NOTCH1	48	-2.95067	0.00489924	0.0973724
APOBEC3G	-1.34339	-0.307375	-2.92601	0.00526824	0.100968	-2.33415	APOBEC3G	43	-2.94806	0.00493418	0.0978171
DNASE1L1	-1.35917	0.20589	-2.9791	0.0047817	0.094698	-2.23592	DNASE1L1	1	-2.96446	0.00493919	0.0978171
AKAP8L	0.329519	0.190384	2.86159	0.00626781	0.111084	-2.48756	AKAP8L	100	2.94433	0.0049847	0.098543
OSBPL3	-0.754275	-0.405995	-2.91749	0.00539146	0.101928	-2.3546	OSBPL3	45	-2.94264	0.00500775	0.0987993
IL32	-0.980633	-1.71253	-2.93292	0.00517033	0.0997327	-2.31756	IL32	10	-2.94208	0.00501542	0.0987993
LUC7L3	0.245066	0.0339582	2.78323	0.00772064	0.123225	-2.67098	LUC7L3	168	2.94022	0.00504097	0.0991272
RAI14	1.57137	0.479337	2.91731	0.00539402	0.101928	-2.35501	RAI14	23	2.93685	0.00508746	0.0998169
CAMKK1	0.752933	-0.113273	2.98916	0.00443436	0.0915666	-2.18154	CAMKK1	2	2.93638	0.00509398	0.0998169
CGNL1	-2.92327	-0.00362055	-8.33802	0.000986749	0.0397348	-1.35288	CGNL1	2	-4.86926	0.0051239	0.100227
SNX17	-0.64471	-0.0914793	-2.90591	0.00556307	0.104237	-2.38229	SNX17	46	-2.93288	0.00514268	0.100418
SASH3	-0.606374	0.101761	-2.88873	0.00582702	0.106494	-2.42323	SASH3	97	-2.92747	0.00521904	0.101701
SNX2	-0.447402	0.253104	-2.87074	0.00611585	0.109789	-2.46591	SNX2	109	-2.92662	0.00523108	0.101701
TUBA1C	-0.338822	-0.00820938	-2.88101	0.00594941	0.107845	-2.44157	TUBA1C	48	-2.92629	0.0052358	0.101701
TMA16	0.403645	0.0582636	2.88585	0.00587235	0.107146	-2.43007	TMA16	50	2.92548	0.00524737	0.10174
TNRC18	0.493419	-0.107826	2.91206	0.00547122	0.102912	-2.36757	TNRC18	26	2.92471	0.00525835	0.10174
SNX5	-0.51367	0.19408	-2.87573	0.00603442	0.108637	-2.45409	SNX5	115	-2.92391	0.00526971	0.10174
USP22	0.46116	0.0808025	2.9077	0.00553622	0.103909	-2.37801	USP22	29	2.92359	0.00527437	0.10174
FNBP1	-1.03031	-0.725646	-2.89199	0.00577596	0.106435	-2.41546	FNBP1	183	-2.92096	0.00531211	0.10229
DDHD2	0.490818	0.101468	2.89919	0.00566485	0.105258	-2.3983	DDHD2	33	2.92015	0.00532385	0.102339
FOXO3B	1.15093	-0.277035	2.94268	0.00503499	0.0978002	-2.29409	FOXO3B	1	2.91793	0.005356	0.102595
SAMD4B	0.356981	0.09882	2.91188	0.00547384	0.102912	-2.368	SAMD4B	26	2.91722	0.0053664	0.102595
FBXL18	-0.663127	-0.0544761	-2.90305	0.00560624	0.104573	-2.38911	FBXL18	23	-2.91688	0.00537136	0.102595
TIMM21	0.444785	0.115349	2.93178	0.00518639	0.0998695	-2.3203	TIMM21	15	2.9167	0.00537402	0.102595
RASGRP2	-0.922206	0.16531	-2.89312	0.00575843	0.106287	-2.41277	RASGRP2	41	-2.91581	0.00538695	0.102666
ZNF436	0.896726	0.280872	2.96926	0.00468282	0.0938681	-2.22987	ZNF436	1	2.91425	0.00540989	0.102927
GCSAM	-0.883764	0.0121372	-2.90157	0.00562863	0.10476	-2.39264	GCSAM	15	-2.91328	0.00542406	0.102978
ZHX2	-0.721901	0.374134	-2.88142	0.00594279	0.107845	-2.44059	ZHX2	79	-2.9128	0.00543108	0.102978
CCDC43	0.412339	0.0983085	2.87822	0.00599425	0.108305	-2.4482	CCDC43	44	2.91195	0.00544365	0.10298
ZCCHC17	0.452641	0.177434	2.91634	0.00540823	0.102023	-2.35734	ZCCHC17	18	2.91154	0.00544969	0.10298
COMMD6	-0.374579	-0.0615955	-3.04212	0.00383196	0.0837912	-2.0519	COMMD6	5	-2.91023	0.00546915	0.103172
PI4KA	-0.473789	0.125785	-2.8518	0.00643435	0.112142	-2.51067	PI4KA	168	-2.90959	0.00547861	0.103176
MGMT	-1.36162	0.363043	-2.88915	0.00582048	0.106494	-2.42223	MGMT	21	-2.90769	0.00550688	0.103533
TCEANC	0.96343	-0.377628	3.07753	0.00417042	0.0882448	-2.00016	TCEANC	1	2.96405	0.00553053	0.103802
ZNF776	0.501432	0.115526	3.00948	0.0041935	0.088517	-2.13199	ZNF776	3	2.90449	0.00555486	0.103987
ZBED3	1.30918	0.0700132	2.89762	0.00568897	0.10553	-2.40205	ZBED3	4	2.90421	0.00555905	0.103987
RGS10	-0.904347	-0.642275	-2.88465	0.00589136	0.107317	-2.43292	RGS10	23	-2.90158	0.00559878	0.104554
MYO1B	1.90194	0.277948	2.8768	0.00601708	0.108541	-2.45155	MYO1B	59	2.89841	0.00564704	0.105279
MSI2	-0.450138	0.16601	-2.85821	0.0063249	0.111617	-2.49555	MSI2	53	-2.89519	0.00569645	0.106023
KCTD5	-0.63058	-0.0920901	-2.89668	0.00570337	0.105569	-2.40429	KCTD5	12	-2.89429	0.00571034	0.106104
LAMC1	1.27311	0.185334	2.87527	0.00604187	0.108637	-2.45518	LAMC1	15	2.89154	0.00575285	0.106715
CEP250	-0.280318	-0.02458	-2.76553	0.0080892	0.12592	-2.7119	CEP250	188	-2.8902	0.00577381	0.106926
NFE2L1	0.88878	-0.279103	2.91786	0.00538602	0.101928	-2.3537	NFE2L1	2	2.88861	0.00579852	0.107174
EPB41	0.392683	0.0469269	2.82107	0.00698397	0.117044	-2.58284	EPB41	124	2.88811	0.00580646	0.107174
PGP	-0.450677	0.00540669	-2.86188	0.00626308	0.111084	-2.48689	PGP	36	-2.88598	0.00583992	0.107613
ABCE1	0.472855	-0.101059	2.82494	0.00691242	0.116814	-2.57378	ABCE1	211	2.88432	0.00586603	0.107844
BCL7B	0.461319	-0.0547798	2.92473	0.00528657	0.101099	-2.33722	BCL7B	8	2.88396	0.00587183	0.107844
AP1G2	-0.800685	-0.035578	-2.85718	0.0063423	0.111617	-2.49797	AP1G2	55	-2.88309	0.00588558	0.107911
CD93	1.7089	-0.243593	2.8701	0.00612639	0.109802	-2.46743	CD93	4	2.88251	0.00589488	0.107911
S1PR4	-0.759034	-0.192138	-2.96311	0.00476217	0.0944793	-2.24476	S1PR4	1	-2.88011	0.0059331	0.108181
DGKA	-0.981515	-0.220387	-2.85298	0.00641409	0.112142	-2.50789	DGKA	96	-2.87989	0.00593654	0.108181
CTSD	-0.805974	-0.207738	-2.95047	0.00492931	0.097103	-2.27531	CTSD	1	-2.87975	0.0059388	0.108181
SDAD1	0.38475	-0.00786853	2.83039	0.00681296	0.115592	-2.56102	SDAD1	62	2.87876	0.00595465	0.108293
SSB	0.388857	0.21567	2.79074	0.00756902	0.122352	-2.65356	SSB	443	2.8762	0.00599597	0.108696
RAB10	0.25612	0.102567	2.76742	0.00804924	0.125826	-2.70756	RAB10	91	2.87617	0.00599635	0.108696
DOK1	-0.706685	-0.0474504	-2.86734	0.00617189	0.110277	-2.47396	DOK1	16	-2.87554	0.00600666	0.108706
RNFT1	-0.579638	0.0284388	-2.97317	0.00463296	0.0932457	-2.22039	RNFT1	2	-2.87429	0.00602685	0.108894
MYO1C	-1.29792	-0.536715	-2.85169	0.00643632	0.112142	-2.51094	MYO1C	48	-2.87361	0.00603784	0.108916
SPINT1	-1.95908	-0.0994781	-2.854	0.0063966	0.112142	-2.50549	SPINT1	11	-2.87182	0.00606706	0.109266
LGALS9	-1.26103	-0.360481	-2.85253	0.00642186	0.112142	-2.50896	LGALS9	22	-2.87081	0.00608355	0.109386
CHPF	-1.70616	-0.468216	-2.88332	0.00617274	0.110277	-2.4622	CHPF	1	-2.88404	0.00612221	0.109857
HEATR5B	-0.330353	0.024012	-2.80061	0.00737377	0.120514	-2.6306	HEATR5B	77	-2.86802	0.00612948	0.109857
PEX1	0.554412	0.0719733	2.83856	0.00666604	0.114143	-2.54183	PEX1	44	2.86578	0.00616643	0.110179
FCRLA	-3.62472	-0.718416	-2.84831	0.0064947	0.11242	-2.51889	FCRLA	2	-2.86573	0.00616726	0.110179
ATG7	-0.534291	0.0775699	-2.83264	0.00677214	0.115251	-2.55573	ATG7	52	-2.86388	0.00619804	0.110437
STAT2	-0.678299	0.0754859	-2.83589	0.00671374	0.114607	-2.54811	STAT2	55	-2.86367	0.00620154	0.110437
GTPBP6	0.866031	0.256589	2.84672	0.00652234	0.112641	-2.52264	GTPBP6	21	2.8622	0.00622599	0.110695
LIAS	0.633404	0.0383329	2.86481	0.00621394	0.110481	-2.47995	LIAS	10	2.85921	0.00627633	0.111238
HIC1	-1.99798	-0.353064	-2.84831	0.00649467	0.11242	-2.51889	HIC1	2	-2.8592	0.00627648	0.111238
SNX18	-0.730154	0.245906	-2.85054	0.00645612	0.112276	-2.51365	SNX18	15	-2.85843	0.00628947	0.111239
UCHL3	-0.596972	-0.0969427	-2.82216	0.00696383	0.117044	-2.5803	UCHL3	84	-2.85801	0.00629653	0.111239
TRGV8	-4.00002	-3.67296	-2.8387	0.00666361	0.114143	-2.54151	TRGV8	1	-2.85545	0.00633998	0.111663
TKFC	-0.602641	0.130292	-2.82061	0.00699258	0.117044	-2.58392	TKFC	76	-2.85484	0.00635024	0.111663
ZNF431	0.946823	0.237374	2.97859	0.00514879	0.0994896	-2.22272	ZNF431	1	2.89447	0.00635064	0.111663
SNAP29	-0.285805	-0.017821	-2.79026	0.00757856	0.122352	-2.65467	SNAP29	56	-2.85279	0.0063853	0.112095
GALNT12	-1.45193	-0.706104	-2.85731	0.00634017	0.111617	-2.49767	GALNT12	1	-2.85112	0.00641396	0.112332
SLC22A23	2.07463	-0.255545	2.99696	0.00661405	0.113778	-2.36584	SLC22A23	1	3.0007	0.00641897	0.112332
GSDME	-2.37138	-0.990555	-2.83156	0.00679172	0.115407	-2.55828	GSDME	12	-2.85019	0.00643002	0.112349
WDFY2	-0.907543	-0.0790959	-2.84088	0.00662501	0.113791	-2.53639	WDFY2	10	-2.84867	0.00645629	0.112631
BUD31	0.318058	0.0341809	2.83655	0.00670188	0.114581	-2.54655	BUD31	29	2.84738	0.00647861	0.112741
KIT	-0.618891	-0.169747	-3.26423	0.00296673	0.0739416	-1.71908	KIT	1	-2.942	0.00650786	0.112741
AGPAT5	0.677709	0.137613	2.82473	0.00691645	0.116814	-2.57429	AGPAT5	34	2.84549	0.00651145	0.112741
SOS2	-0.474351	0.132907	-2.84641	0.0065277	0.112641	-2.52336	SOS2	18	-2.84501	0.00651991	0.112741
MYOF	-1.87548	-0.137818	-2.90177	0.00654984	0.112848	-2.41057	MYOF	1	-2.89957	0.00652225	0.112741
SEMA6C	1.7261	0.418898	2.94152	0.00647153	0.112368	-2.38853	SEMA6C	1	2.93282	0.0065234	0.112741
SMARCAD1	0.373051	-0.142367	2.77662	0.0078565	0.124245	-2.68629	SMARCAD1	105	2.8418	0.00657608	0.113476
C5orf15	0.848871	-0.123105	2.85861	0.00631811	0.111617	-2.4946	C5orf15	3	2.83949	0.00661688	0.113743
SPINT2	-1.05788	-0.161628	-2.85157	0.00643836	0.112142	-2.51122	SPINT2	2	-2.83864	0.00663184	0.113743
ZNF746	0.434868	0.0712274	2.9047	0.0055812	0.104401	-2.38516	ZNF746	6	2.8383	0.006638	0.113743
TGOLN2	0.724114	0.112217	2.81636	0.00707202	0.11713	-2.59386	TGOLN2	37	2.83817	0.00664023	0.113743
VPS35L	-1.05969	-0.158431	-2.81543	0.00708948	0.117245	-2.59603	VPS35L	50	-2.83803	0.00664269	0.113743
FSIP1	1.44004	0.00975138	3.29394	0.00527067	0.100968	-2.01688	FSIP1	1	3.15309	0.00665492	0.113778
SLC25A21	3.03872	0.443099	9.56482	0.000573316	0.0309757	-1.20338	SLC25A21	1	4.56368	0.00666953	0.113853
SLC43A1	-0.659525	0.276904	-2.83453	0.00673812	0.114847	-2.5513	SLC43A1	11	-2.83327	0.00672778	0.114625
BNC2	2.31889	0.341399	2.91634	0.00702734	0.117044	-2.45547	BNC2	1	2.92756	0.00674217	0.114625
CAB39	-0.28717	-0.0990971	-2.73347	0.00879869	0.131652	-2.78558	CAB39	118	-2.83228	0.00674568	0.114625
PTP4A1	0.634268	0.231331	2.85685	0.00634804	0.111617	-2.49877	PTP4A1	5	2.83043	0.00677898	0.115015
AC092279.1	-1.21266	0.0998646	-3.08612	0.00537341	0.101928	-2.13716	AC092279.1	1	-2.97593	0.00680189	0.11506
NDOR1	-0.420793	-0.121943	-2.82662	0.00688158	0.116578	-2.56984	NDOR1	22	-2.82915	0.00680227	0.11506
AC099494.7	0.920657	-0.237885	3.53965	0.00249409	0.0664097	-1.39758	AC099494.7	1	3.05889	0.0068249	0.115082
MELTF	-2.01324	0.246728	-2.808	0.00723083	0.118876	-2.61339	MELTF	30	-2.82783	0.00682618	0.115082
FCMR	-1.73306	0.0549229	-2.81921	0.00701872	0.117044	-2.58721	FCMR	2	-2.82719	0.00683795	0.115082
NFKB1	-0.746893	0.0998094	-2.79391	0.00750572	0.121954	-2.64618	NFKB1	135	-2.82668	0.00684717	0.115082
CDKAL1	0.366875	-0.181446	2.78645	0.00765527	0.122453	-2.66351	CDKAL1	49	2.82624	0.00685527	0.115082
C17orf97	-1.4222	-0.205145	-2.81776	0.00704577	0.117044	-2.59059	C17orf97	3	-2.82417	0.00689311	0.115543
DUSP23	1.09947	-0.106472	2.81703	0.00705939	0.117095	-2.59229	DUSP23	4	2.81884	0.00699178	0.11702
LIN28B	1.08046	-1.06176	2.80908	0.0072101	0.118876	-2.61087	LIN28B	7	2.81758	0.00701529	0.117066
COA5	-0.682028	0.087689	-2.91859	0.00537537	0.101928	-2.35195	COA5	1	-2.81743	0.00701818	0.117066
SPIN4	-0.854703	0.0640623	-2.81824	0.00703676	0.117044	-2.58946	SPIN4	6	-2.81701	0.00702605	0.117066
CEMIP2	-1.26303	0.357735	-2.79956	0.0073943	0.120672	-2.63304	CEMIP2	16	-2.81592	0.00704637	0.117182
PHF21A	0.453624	0.229235	2.82326	0.00694353	0.117044	-2.57773	PHF21A	16	2.81527	0.00705854	0.117182
CYP2U1	1.08388	-0.386064	2.81043	0.00718429	0.118637	-2.60771	CYP2U1	5	2.81495	0.00706464	0.117182
KCNN4	1.41252	-0.207643	2.80454	0.00729737	0.119701	-2.62144	KCNN4	3	2.81087	0.00714176	0.118128
RBIS	0.574756	-0.118893	2.82081	0.00698894	0.117044	-2.58347	RBIS	10	2.81081	0.00714285	0.118128
LYN	-1.22154	0.442824	-2.78787	0.00762656	0.122453	-2.66021	LYN	51	-2.80966	0.00716472	0.118314
NCLN	0.425157	0.10414	2.77317	0.00792828	0.124245	-2.69427	NCLN	49	2.80752	0.00720573	0.118741
MFSD2A	1.2537	-0.329438	3.05621	0.00620198	0.110481	-2.28911	MFSD2A	1	2.97869	0.00721195	0.118741
TGFBR2	-1.15194	0.266262	-2.78884	0.00760717	0.122352	-2.65798	TGFBR2	21	-2.80615	0.00723198	0.118895
CD84	-1.87424	-0.934783	-2.78634	0.00765744	0.122453	-2.66376	CD84	9	-2.80317	0.00728941	0.119573
ANKRD44	-0.996672	-0.166018	-2.77844	0.00781881	0.124142	-2.68207	ANKRD44	72	-2.8029	0.00729471	0.119573
PIGH	-1.01262	-0.226743	-2.80812	0.00722846	0.118876	-2.6131	PIGH	3	-2.80164	0.007319	0.119795
LIMD2	-0.827191	-0.0838976	-2.78988	0.00758616	0.122352	-2.65555	LIMD2	13	-2.79873	0.00737577	0.120513
FIP1L1	0.286053	0.0230085	2.86503	0.00621034	0.110481	-2.47944	FIP1L1	14	2.79829	0.00738454	0.120513
GRAMD1A	0.619817	-0.0171633	2.78952	0.00759336	0.122352	-2.65638	GRAMD1A	18	2.79738	0.00740235	0.120627
BRF2	0.514217	-0.0385865	2.88135	0.00594394	0.107845	-2.44076	BRF2	3	2.79553	0.00743879	0.120877
WDFY4	-1.35856	0.0431285	-2.77275	0.00793693	0.124245	-2.69523	WDFY4	89	-2.79549	0.00743942	0.120877
PNMA8A	-1.54735	-0.339206	-3.03905	0.00701785	0.117044	-2.28287	PNMA8A	3	-2.99718	0.0074696	0.12119
PPIL4	0.394886	0.0557951	2.73217	0.00882862	0.1318	-2.78856	PPIL4	120	2.79304	0.007488	0.121235
COQ10B	-0.687019	-0.112489	-2.88896	0.00582336	0.106494	-2.42267	COQ10B	1	-2.79273	0.00749411	0.121235
CTPS2	-1.37936	0.00399531	-2.77377	0.00791575	0.124245	-2.69289	CTPS2	22	-2.79196	0.00750944	0.121306
ZNRF2	-0.637149	0.0455919	-2.79088	0.00756612	0.122352	-2.65322	ZNRF2	12	-2.79056	0.00753725	0.121471
ID2	-2.11777	-0.28532	-2.83252	0.00779962	0.124142	-2.61285	ID2	1	-2.84188	0.00754872	0.121471
DDX55	0.403491	-0.0595779	2.76128	0.00818014	0.126804	-2.72171	DDX55	40	2.78947	0.00755905	0.121471
MOB3A	-1.10764	-0.328732	-2.77556	0.00787836	0.124245	-2.68873	MOB3A	13	-2.78926	0.00756326	0.121471
BORCS5	-0.719422	-0.151913	-2.77713	0.00784598	0.124245	-2.68512	BORCS5	18	-2.78809	0.00758678	0.121583
PCBP1	-0.288766	0.06878	-2.68417	0.0100021	0.14003	-2.89768	PCBP1	158	-2.78783	0.00759209	0.121583
VPREB3	-2.25152	0.24168	-2.77532	0.00788343	0.124245	-2.68929	VPREB3	1	-2.78489	0.00765142	0.122357
GID4	-0.248459	0.00933618	-2.89044	0.00580015	0.106494	-2.41914	GID4	13	-2.78334	0.00768284	0.122683
NIBAN3	-1.51401	0.449891	-2.76417	0.00811824	0.126195	-2.71505	NIBAN3	23	-2.78272	0.00769537	0.122707
MTA1	0.266496	0.113241	2.68028	0.0101031	0.140736	-2.90645	MTA1	103	2.7801	0.00774885	0.123383
CCNYL1	-0.595899	-0.0476245	-2.78287	0.00772789	0.123225	-2.6718	CCNYL1	11	-2.77788	0.00779446	0.123866
PAXIP1	0.310092	0.0988992	2.7422	0.00860015	0.129526	-2.7656	PAXIP1	41	2.77754	0.00780147	0.123866
MEAF6	-0.237587	0.0573009	-2.78655	0.00765328	0.122453	-2.66328	MEAF6	26	-2.77617	0.00782974	0.124102
KHSRP	0.23463	0.088175	2.60342	0.012304	0.1585	-3.07808	KHSRP	442	2.77574	0.0078386	0.124102
PODXL	1.41199	0.134653	2.75659	0.00828164	0.127489	-2.73252	PODXL	20	2.77439	0.00786664	0.124227
PRCC	0.32572	0.155209	2.7502	0.00842155	0.128528	-2.74721	PRCC	35	2.77429	0.00786884	0.124227
WWC3	-1.47397	0.196707	-2.75266	0.00836747	0.128455	-2.74156	WWC3	35	-2.77248	0.00790637	0.124466
ZSWIM8	-0.36941	0.136528	-2.77413	0.00790809	0.124245	-2.69204	ZSWIM8	22	-2.77234	0.00790932	0.124466
ARHGAP1	-0.464002	0.0241644	-2.72461	0.00900454	0.133272	-2.80583	ARHGAP1	108	-2.77195	0.00791751	0.124466
COLGALT1	0.775267	-0.0128797	2.74502	0.00853676	0.128979	-2.75911	COLGALT1	59	2.77043	0.00794942	0.124791
PLEC	-1.27406	-0.700226	-2.74419	0.00855529	0.129025	-2.76101	PLEC	427	-2.76934	0.0079723	0.124974
PGGT1B	0.613533	0.0622736	2.75956	0.00821734	0.127026	-2.72569	PGGT1B	19	2.76848	0.00799038	0.125082
CARNMT1	0.547037	0.0292443	2.76577	0.00808416	0.12592	-2.71136	CARNMT1	16	2.76722	0.00801699	0.125322
POMK	0.523786	-0.106235	2.77305	0.00793066	0.124245	-2.69454	POMK	13	2.76605	0.00804175	0.125381
R3HCC1L	-0.366452	0.138105	-2.75064	0.00841194	0.128528	-2.74621	R3HCC1L	30	-2.76561	0.00805106	0.125381
AL159141.1	-1.39384	-0.920257	-2.75163	0.0083901	0.128528	-2.74393	AL159141.1	8	-2.76544	0.00805454	0.125381
CHPF2	0.47062	-0.0727401	2.75765	0.00825857	0.127332	-2.73007	CHPF2	22	2.76419	0.00808123	0.125525
UNC119	-0.616827	-0.0865158	-2.75287	0.00836293	0.128455	-2.74108	UNC119	21	-2.76395	0.00808641	0.125525
GATB	-0.346177	0.00645797	-2.74887	0.0084511	0.12854	-2.75028	GATB	30	-2.76328	0.00810064	0.125571
GOLM1	1.64142	0.0291858	2.74484	0.00854067	0.128979	-2.75952	GOLM1	14	2.76196	0.00812884	0.125833
ERGIC3	0.337082	-0.0769855	2.72476	0.00900102	0.133272	-2.80549	ERGIC3	41	2.75728	0.00822956	0.127165
ACAP1	-0.571134	-0.300078	-2.72089	0.00909235	0.134085	-2.81432	ACAP1	90	-2.75652	0.00824599	0.127165
TYW1	0.650948	0.0753328	2.81884	0.0070256	0.117044	-2.58807	TYW1	2	2.75638	0.00824915	0.127165
ACACA	0.726737	-0.179541	2.72155	0.00907666	0.134085	-2.81281	ACACA	220	2.75578	0.00826213	0.127189
ZCCHC4	0.477363	0.00688145	2.75758	0.00825998	0.127332	-2.73023	ZCCHC4	16	2.75354	0.00831098	0.127648
WRNIP1	0.386565	0.210947	2.71344	0.00927056	0.135299	-2.8313	WRNIP1	55	2.75336	0.00831487	0.127648
DGCR6L	0.604257	-0.00972203	2.87899	0.00598184	0.108257	-2.44637	DGCR6L	1	2.75253	0.00833308	0.127726
OBI1	-0.671616	-0.160522	-2.72644	0.00896181	0.132993	-2.80167	OBI1	52	-2.75208	0.0083429	0.127726
METTL8	0.5111	0.00542761	2.76672	0.00806407	0.125881	-2.70917	METTL8	10	2.75065	0.00837446	0.128033
LRP12	0.848093	-0.401557	2.80144	0.00735767	0.120428	-2.62868	LRP12	1	2.74987	0.00839163	0.128119
PRPS2	-1.09638	-0.232091	-2.73072	0.00886212	0.131865	-2.79187	PRPS2	22	-2.74781	0.00843703	0.12851
KAT2B	-0.627678	0.021433	-2.75117	0.0084003	0.128528	-2.74499	KAT2B	10	-2.74728	0.00844876	0.12851
PASK	-0.391247	0.0530224	-2.70619	0.00944703	0.137087	-2.84779	PASK	58	-2.74714	0.00845185	0.12851
LDLRAD4	-0.922092	-0.0492289	-2.76357	0.00813119	0.126221	-2.71644	LDLRAD4	2	-2.74359	0.008531	0.129518
IGFBP3	-2.05829	-0.0185498	-2.91954	0.00875049	0.131435	-2.5573	IGFBP3	1	-2.91927	0.00854144	0.129518
ZDHHC5	-0.246644	-0.0773252	-2.78901	0.00760368	0.122352	-2.65757	ZDHHC5	19	-2.74236	0.00855859	0.129602
ATP6V0D1	-0.645809	0.095208	-2.71914	0.00913402	0.134118	-2.81832	ATP6V0D1	40	-2.74167	0.00857408	0.12966
RTEL1	0.525031	-0.254556	2.74982	0.00842993	0.128528	-2.74808	RTEL1	12	2.74109	0.00858712	0.129681
HPS5	-0.426193	0.0911729	-2.71275	0.00928736	0.135299	-2.83289	HPS5	41	-2.74014	0.00860866	0.129701
CBL	-0.452393	0.0204463	-2.69817	0.00964574	0.138347	-2.86598	CBL	78	-2.74	0.0086118	0.129701
STRBP	-0.439676	0.187516	-2.68131	0.0100763	0.140538	-2.90413	STRBP	177	-2.73725	0.00867411	0.130367
MED12L	1.01263	-0.400709	2.73656	0.00872779	0.131271	-2.7785	MED12L	4	2.73635	0.0086946	0.130367
PPP2R1B	0.524688	-0.187142	2.70086	0.00957878	0.13792	-2.8599	PPP2R1B	74	2.73609	0.00870053	0.130367
TLK2	0.262331	0.0173531	2.68646	0.00994299	0.139906	-2.8925	TLK2	46	2.73598	0.008703	0.130367
STK38	-0.592286	0.308676	-2.70433	0.00949282	0.137214	-2.85202	STK38	70	-2.73547	0.00871457	0.130367
LPXN	-1.1392	-0.148241	-2.71455	0.00924372	0.135299	-2.82877	LPXN	34	-2.73409	0.00874619	0.130625
IMPDH1	0.6	0.15032	2.7038	0.00950592	0.137226	-2.85322	IMPDH1	65	2.73369	0.00875531	0.130625
ZBTB40	0.280075	0.227418	2.6709	0.0103509	0.142975	-2.92759	ZBTB40	60	2.73313	0.00876811	0.130641
ARHGAP5	0.638805	-0.00651533	2.69827	0.00964328	0.138347	-2.86576	ARHGAP5	90	2.73014	0.00883718	0.131494
C2orf68	-0.386577	-0.0411892	-2.89053	0.00579876	0.106494	-2.41893	C2orf68	3	-2.72884	0.00886716	0.131676
STAT5A	-0.852281	-0.483028	-2.71309	0.00927905	0.135299	-2.8321	STAT5A	22	-2.72859	0.00887305	0.131676
MYC	0.772502	0.0406557	2.71773	0.0091677	0.134435	-2.82154	MYC	13	2.72541	0.00894714	0.132599
USP6NL	-0.402414	0.0613157	-2.73339	0.00880047	0.131652	-2.78576	USP6NL	17	-2.72353	0.00899113	0.133073
OFD1	-0.487535	0.152663	-2.68452	0.00999322	0.14003	-2.8969	OFD1	75	-2.72209	0.00902518	0.1334
GUF1	0.455285	0.179081	2.69667	0.00968335	0.138351	-2.86939	GUF1	39	2.72136	0.0090422	0.133474
KLF3	1.31671	-0.0453399	2.71974	0.0091197	0.134085	-2.81695	KLF3	2	2.72036	0.00906588	0.133624
GSTM2	-1.25595	0.0384618	-2.70263	0.0095349	0.137466	-2.85588	GSTM2	21	-2.71992	0.00907634	0.133624
PPM1L	1.09378	-0.0346351	2.70438	0.0094915	0.137214	-2.8519	PPM1L	11	2.71682	0.00915014	0.134461
ZNF625	-1.73949	-0.244193	-2.81172	0.00845387	0.12854	-2.51142	ZNF625	1	-2.77537	0.00915736	0.134461
C8orf88	1.07357	-0.29642	2.75927	0.00853689	0.128979	-2.72032	C8orf88	1	2.72831	0.00919686	0.134863
SRA1	-0.565595	-0.322116	-2.71375	0.00926315	0.135299	-2.8306	SRA1	13	-2.71152	0.00927762	0.135803
DNAJC6	1.65261	-0.701077	2.69703	0.00967454	0.138351	-2.86859	DNAJC6	6	2.7112	0.00928536	0.135803
BPHL	0.818062	0.321775	2.69501	0.00972513	0.138592	-2.87315	BPHL	21	2.70965	0.00932282	0.136172
GDPD1	0.734215	0.209119	2.69705	0.00967393	0.138351	-2.86853	GDPD1	16	2.70682	0.00939184	0.136877
AP1AR	0.422884	0.14234	2.74779	0.00847497	0.128685	-2.75275	AP1AR	8	2.70666	0.00939569	0.136877
LRRC1	0.934318	0.0913687	2.68667	0.00993776	0.139906	-2.89204	LRRC1	25	2.70372	0.00946801	0.13775
NFIL3	1.2431	0.10849	2.6895	0.00986499	0.139691	-2.88562	NFIL3	10	2.70301	0.00948538	0.137823
TAF1C	0.498991	0.0251583	2.71112	0.00932677	0.135655	-2.83659	TAF1C	11	2.69786	0.00961333	0.139018
PSD4	-0.563072	-0.355758	-2.67307	0.0102931	0.142668	-2.92271	PSD4	44	-2.69778	0.00961545	0.139018
GAR1	0.468902	0.205166	2.65918	0.0106683	0.14522	-2.95393	GAR1	76	2.69776	0.00961573	0.139018
TMEM38B	0.955868	-0.261257	2.7045	0.00948856	0.137214	-2.85163	TMEM38B	3	2.69724	0.00962895	0.139018
TMEM9B	-0.455354	-0.144415	-2.74525	0.00853167	0.128979	-2.75859	TMEM9B	6	-2.69719	0.00963012	0.139018
POLR1C	0.392248	0.0467176	2.65561	0.0107667	0.145885	-2.96194	POLR1C	59	2.69542	0.00967461	0.13948
SOX13	1.8194	0.0725176	2.81345	0.0098292	0.139592	-2.72468	SOX13	1	2.81162	0.00971023	0.139812
TM9SF2	-0.371006	-0.0784712	-2.65528	0.0107759	0.145885	-2.96268	TM9SF2	50	-2.69178	0.00976645	0.14044
PLEKHA2	-0.995185	0.0378549	-2.66983	0.0103795	0.142975	-2.93	PLEKHA2	45	-2.69077	0.00979199	0.140626
IRF7	-0.896297	-0.218168	-2.68759	0.00991397	0.139906	-2.88995	IRF7	6	-2.6899	0.00981426	0.140764
UBXN8	0.761585	-0.216787	2.71073	0.00933619	0.135655	-2.83747	UBXN8	3	2.68831	0.00985472	0.141162
FCER2	-1.97971	-2.15555	-2.67138	0.0103381	0.142975	-2.92651	FCER2	7	-2.68745	0.0098768	0.141297
ZFP36L2	-0.63177	-0.0739079	-2.68587	0.00995818	0.139943	-2.89383	ZFP36L2	12	-2.68668	0.00989642	0.141396
CCM2	-0.948852	0.124048	-2.66575	0.0104895	0.143425	-2.93919	CCM2	40	-2.68611	0.00991106	0.141423
DYNC2H1	1.59928	0.30412	2.66812	0.0104254	0.143425	-2.93385	DYNC2H1	15	2.68499	0.00993989	0.141549
NECTIN3	1.34491	-0.763736	2.67597	0.0102163	0.142135	-2.91617	NECTIN3	4	2.68453	0.00995171	0.141549
LPCAT2	-2.54182	-0.157899	-2.66662	0.0104659	0.143425	-2.93723	LPCAT2	10	-2.68429	0.00995802	0.141549
SFT2D3	-0.764092	-0.0166025	-2.69071	0.0098341	0.139592	-2.88288	SFT2D3	5	-2.6827	0.0099991	0.141887
IPO5	-0.357556	-0.0711765	-2.6007	0.0123895	0.159048	-3.08409	IPO5	444	-2.68208	0.0100153	0.141887
ZGRF1	0.424694	-0.117692	2.65613	0.0107523	0.145885	-2.96077	ZGRF1	40	2.68189	0.01002	0.141887
HMGA2	2.24613	-0.114845	2.68644	0.010371	0.142975	-2.88774	HMGA2	1	2.69665	0.0100517	0.14192
PFKFB3	-0.63734	0.161269	-2.67056	0.01036	0.142975	-2.92836	PFKFB3	19	-2.68056	0.0100546	0.14192
IFNAR1	-0.486266	0.0360386	-2.68673	0.00993622	0.139906	-2.8919	IFNAR1	14	-2.68019	0.0100645	0.14192
SLFN5	-1.06019	-0.524966	-2.65957	0.0106577	0.14522	-2.95306	SLFN5	39	-2.67948	0.0100829	0.14192
MED13L	-0.383421	0.177554	-2.64364	0.011103	0.148708	-2.98874	MED13L	51	-2.67936	0.0100861	0.14192
PLAGL2	0.556556	0.0145004	2.69845	0.00963881	0.138347	-2.86536	PLAGL2	6	2.67413	0.0102235	0.143381
FRMD4A	0.688369	-0.830282	2.68819	0.00989857	0.139906	-2.88859	FRMD4A	5	2.67406	0.0102253	0.143381
ABL2	0.400442	0.16826	2.66597	0.0104833	0.143425	-2.93868	ABL2	25	2.67393	0.0102286	0.143381
TTF1	-0.561256	-0.0374922	-2.64391	0.0110951	0.148708	-2.98811	TTF1	57	-2.67225	0.0102732	0.143825
ARMCX3	-0.700019	0.0952165	-2.65481	0.0107888	0.145885	-2.96373	ARMCX3	28	-2.67166	0.010289	0.143835
STK17B	-0.741531	-0.180271	-2.6596	0.0106568	0.14522	-2.95299	STK17B	18	-2.67125	0.0102998	0.143835
MAPK15	0.444755	0.280475	2.73193	0.00883407	0.1318	-2.7891	MAPK15	5	2.66992	0.0103353	0.144128
EFCAB7	0.769962	-0.00278209	2.72989	0.00888136	0.131975	-2.79377	EFCAB7	1	2.66949	0.0103467	0.144128
NR2C1	0.303784	0.0882359	2.68136	0.010075	0.140538	-2.90401	NR2C1	21	2.66841	0.0103758	0.144257
SINHCAF	0.320307	0.109928	2.7342	0.00878203	0.131652	-2.78393	SINHCAF	10	2.66818	0.0103818	0.144257
SLC7A2	1.7911	0.410429	2.66676	0.0109012	0.147067	-2.95984	SLC7A2	4	2.68174	0.0104407	0.144594
CEP83	0.425505	0.0918643	2.64579	0.0110419	0.148246	-2.98392	CEP83	34	2.66598	0.0104411	0.144594
TERF2IP	-0.325908	0.0670578	-2.604	0.0122859	0.1585	-3.0768	TERF2IP	86	-2.66551	0.0104538	0.144594
PPP1CC	0.24573	0.00623005	2.68459	0.00999115	0.14003	-2.89672	PPP1CC	23	2.66502	0.010467	0.144594
RASSF7	0.412688	-0.0748337	2.76072	0.00819215	0.126813	-2.72299	RASSF7	4	2.66487	0.0104711	0.144594
CYREN	0.634971	-0.0560994	2.8343	0.00747252	0.12177	-2.61302	CYREN	1	2.69488	0.0105481	0.145478
TMF1	-0.430379	-0.0696106	-2.60635	0.0122126	0.158054	-3.0716	TMF1	107	-2.65321	0.0107906	0.148316
B4GALT1	-0.744266	-0.114013	-2.6544	0.0108004	0.145885	-2.96466	B4GALT1	7	-2.65296	0.0107977	0.148316
CC2D1B	-0.426081	0.0259271	-2.62135	0.0117545	0.153553	-3.03836	CC2D1B	50	-2.65282	0.0108015	0.148316
DPY30	0.565231	-0.0141842	2.68173	0.0100655	0.140538	-2.90319	DPY30	5	2.65225	0.0108172	0.148316
FNTA	0.432707	0.105573	2.6175	0.0118706	0.154708	-3.04691	FNTA	58	2.65213	0.0108205	0.148316
LACTB	-0.742947	-0.564573	-2.63182	0.0114441	0.151274	-3.01508	LACTB	31	-2.64996	0.0108813	0.148965
APBB1IP	-0.762021	0.231584	-2.62282	0.0117106	0.153159	-3.03511	APBB1IP	82	-2.64908	0.010906	0.14912
PSMD5	-1.04113	-0.155281	-2.62697	0.0115871	0.15226	-3.02589	PSMD5	51	-2.64791	0.0109389	0.149386
ARMC10	0.411955	0.145517	2.63549	0.0113371	0.150756	-3.00691	ARMC10	26	2.64566	0.0110022	0.150067
SREBF1	0.678801	0.0471546	2.69164	0.00981056	0.139592	-2.88079	SREBF1	2	2.64426	0.0110418	0.150423
BLOC1S2	-0.524648	0.0614906	-2.6382	0.0112588	0.150329	-3.00087	BLOC1S2	18	-2.64283	0.0110826	0.150775
RUFY1	-0.456681	0.241354	-2.5984	0.0124621	0.159656	-3.08917	RUFY1	112	-2.6424	0.0110948	0.150775
WDR17	1.42582	-0.927336	2.67112	0.0112646	0.150329	-2.94598	WDR17	2	2.67406	0.01111	0.150797
NOL11	0.442022	0.00647279	2.59701	0.012506	0.159806	-3.09222	NOL11	100	2.64096	0.0111359	0.150965
SDHB	0.739041	0.0845641	2.60678	0.0121993	0.158054	-3.07066	SDHB	106	2.63479	0.0113136	0.153188
POP1	0.624671	0.0651529	2.6035	0.0123016	0.1585	-3.07791	POP1	75	2.63225	0.0113877	0.153853
TUBB	-0.349307	-0.0760954	-2.55689	0.0138409	0.169189	-3.18018	TUBB	264	-2.63216	0.0113903	0.153853
PPP4R1	-0.447087	0.105423	-2.5903	0.0127207	0.161623	-3.107	PPP4R1	88	-2.63136	0.0114137	0.153982
FOXO1	-1.00802	0.353329	-2.61946	0.0118113	0.154114	-3.04255	FOXO1	11	-2.63082	0.0114293	0.154006
TMEM263	-0.796556	0.418573	-2.61536	0.0119356	0.155372	-3.05166	TMEM263	22	-2.63007	0.0114515	0.154118
ACP2	0.935675	-0.187702	2.63132	0.0114588	0.151288	-3.01619	ACP2	4	2.62956	0.0114663	0.15413
ACTB	-1.27796	-0.927559	-2.63617	0.0113176	0.150756	-3.0054	ACTB	1	-2.62808	0.01151	0.154532
IL4R	-1.06754	-0.0210215	-2.70087	0.0106888	0.145257	-2.89349	IL4R	1	-2.66512	0.0115876	0.155385
ITGAV	1.26047	-0.285319	2.61282	0.0120129	0.156196	-3.05727	ITGAV	7	2.62462	0.0116124	0.155484
HSH2D	-1.54575	0.159492	-2.60875	0.0121383	0.157458	-3.0663	HSH2D	11	-2.62426	0.0116232	0.155484
RAB43	-0.564888	-0.00816887	-2.62622	0.0116093	0.152328	-3.02755	RAB43	12	-2.62355	0.0116443	0.155484
ZNF770	0.348016	0.26181	2.63325	0.0114025	0.151263	-3.01191	ZNF770	19	2.62333	0.0116508	0.155484
GCC2	-0.473905	-0.117501	-2.57613	0.0131854	0.165341	-3.13813	GCC2	168	-2.62199	0.0116907	0.15583
ARIH1	0.312067	0.16667	2.57892	0.0130928	0.164659	-3.13202	ARIH1	50	2.62013	0.0117465	0.156386
SULT1A1	1.25404	0.464792	2.64487	0.0115202	0.151919	-3.0081	SULT1A1	1	2.63407	0.0117789	0.156629
HNRNPR	0.196146	0.0924966	2.4177	0.0195391	0.200957	-3.47735	HNRNPR	491	2.61763	0.0118218	0.157012
ACOT4	-2.16093	-0.568678	-2.69525	0.0123636	0.158899	-2.93962	ACOT4	1	-2.70671	0.0118872	0.157627
ZSCAN20	1.05224	0.081899	2.63572	0.0113305	0.150756	-3.00639	ZSCAN20	1	2.61517	0.0118964	0.157627
VAPB	0.430914	0.0013454	2.58145	0.0130091	0.163977	-3.12646	VAPB	55	2.61406	0.0119299	0.157884
TATDN1	0.453122	0.0791985	2.58757	0.0128091	0.16256	-3.11301	TATDN1	42	2.6128	0.0119685	0.158206
MBOAT2	1.21395	-0.317194	2.59813	0.0124704	0.159656	-3.08975	MBOAT2	6	2.60831	0.0121064	0.159839
NQO2	0.896468	-0.464717	2.59372	0.012611	0.160573	-3.09948	NQO2	13	2.60464	0.0122201	0.16115
PRXL2B	-0.705489	-0.10402	-2.62854	0.0115407	0.152009	-3.02239	PRXL2B	3	-2.60302	0.0122707	0.161625
TAF5	0.201724	0.0325489	2.52378	0.015039	0.17638	-3.25201	TAF5	52	2.59815	0.0124239	0.16345
VARS2	-0.460203	-0.104763	-2.56809	0.0134558	0.16752	-3.15573	VARS2	52	-2.5975	0.0124444	0.163526
STYK1	-1.83808	-0.0245043	-3.66095	0.00781227	0.124142	-2.15119	STYK1	1	-3.22897	0.0124925	0.163964
CORO1A	-0.715262	-0.178132	-2.56267	0.0136411	0.168695	-3.16759	CORO1A	334	-2.59492	0.0125264	0.164028
SH3BP5L	0.742221	0.121279	2.58317	0.0129525	0.163824	-3.12267	SH3BP5L	18	2.5949	0.0125268	0.164028
TP53RK	-0.393122	0.0901044	-2.56686	0.0134977	0.167784	-3.15843	TP53RK	42	-2.59397	0.0125565	0.164194
DYRK1B	-1.62241	-0.276616	-2.60582	0.012531	0.159942	-3.00116	DYRK1B	1	-2.60287	0.012569	0.164194
TAF1A	0.471684	0.0178869	2.67425	0.0102618	0.142411	-2.92004	TAF1A	3	2.59238	0.0126073	0.164396
CYTH4	-1.4283	0.0574365	-2.59529	0.0129528	0.163824	-3.11261	CYTH4	3	-2.60405	0.012614	0.164396
HNRNPF	-0.210947	0.0217389	-2.41794	0.0195277	0.200957	-3.47685	HNRNPF	507	-2.5914	0.0126388	0.164527
FLOT1	-0.592843	0.315398	-2.55884	0.0137734	0.169189	-3.17594	FLOT1	88	-2.58938	0.0127038	0.165179
UAP1L1	-1.80486	-0.21332	-2.56974	0.0133999	0.167011	-3.15212	UAP1L1	37	-2.58826	0.0127402	0.165302
HLA-DQA1	-1.80536	-0.471737	-2.58246	0.0129758	0.163928	-3.12423	HLA-DQA1	1	-2.5881	0.0127452	0.165302
C5orf24	0.353683	0.218231	2.63222	0.0114325	0.151274	-3.0142	C5orf24	10	2.58771	0.0127578	0.165302
SLC25A35	-0.749236	-0.015711	-2.64034	0.0115669	0.152174	-2.98504	SLC25A35	2	-2.59789	0.0128106	0.165656
ELOVL1	0.374986	0.189696	2.6958	0.00970537	0.138488	-2.87137	ELOVL1	4	2.58595	0.0128149	0.165656
MFN2	0.408248	0.128263	2.54549	0.0142433	0.170975	-3.20499	MFN2	70	2.5846	0.0128591	0.166034
ZNF503	1.78118	-0.416047	3.4989	0.00789511	0.124245	-2.2107	ZNF503	1	3.10814	0.0128988	0.166355
HPGD	-1.76279	-2.43324	-2.56638	0.0135141	0.167784	-3.15948	HPGD	7	-2.58135	0.0129655	0.167021
RGS2	1.56136	0.380909	2.59545	0.013038	0.164155	-3.08659	RGS2	1	2.59491	0.0129941	0.167074
ADAP1	-1.4635	-0.130307	-2.57156	0.0133385	0.16662	-3.14815	ADAP1	3	-2.58006	0.013008	0.167074
TENT4A	0.582542	0.119901	2.62504	0.0116442	0.152471	-3.03017	TENT4A	3	2.57985	0.0130147	0.167074
OSBPL8	-0.392093	-0.101328	-2.52976	0.0148159	0.175202	-3.23908	OSBPL8	103	-2.57832	0.0130652	0.16745
FOXJ3	0.344605	0.0574619	2.59332	0.0126237	0.160573	-3.10036	FOXJ3	17	2.57776	0.0130838	0.16745
TRIP12	-0.29331	-0.141282	-2.48971	0.0163694	0.184759	-3.32517	TRIP12	199	-2.5776	0.0130891	0.16745
DEF8	-1.812	-0.726139	-2.57038	0.0133784	0.16693	-3.15073	DEF8	1	-2.5762	0.0131358	0.167757
APOBEC3F	-1.20072	-0.065591	-2.56087	0.0137029	0.169189	-3.1715	APOBEC3F	15	-2.57577	0.01315	0.167757
PHF3	0.22755	0.0851153	2.44439	0.018305	0.195491	-3.42135	PHF3	202	2.57552	0.0131583	0.167757
ZNF282	0.533417	0.000666406	2.63252	0.0114237	0.151274	-3.01353	ZNF282	3	2.57497	0.0131766	0.167799
PALLD	1.75566	-0.731438	2.55655	0.0138529	0.169189	-3.18094	PALLD	20	2.57381	0.0132153	0.16799
BORCS6	-0.584334	0.0520019	-2.55386	0.013947	0.169705	-3.1868	BORCS6	36	-2.57362	0.0132218	0.16799
EVL	-1.12108	-0.535011	-2.54924	0.0141099	0.170266	-3.19685	EVL	212	-2.57244	0.0132612	0.168297
TMOD1	-2.59391	-2.62578	-2.56954	0.0138117	0.169189	-3.16843	TMOD1	1	-2.58314	0.0132924	0.168361
FAM241A	1.77605	0.218556	2.55755	0.013818	0.169189	-3.17874	FAM241A	5	2.57139	0.0132965	0.168361
UNC13B	1.41694	0.0945033	2.55313	0.0139724	0.169705	-3.18837	UNC13B	16	2.56916	0.0133717	0.168779
CCDC112	1.44855	-0.606298	2.60322	0.0131974	0.165341	-3.04561	CCDC112	1	2.59455	0.0134053	0.168779
ZNF772	-1.08548	0.0879909	-2.79504	0.0102548	0.142411	-2.67166	ZNF772	1	-2.67125	0.0134112	0.168779
THAP4	0.481086	0.115811	2.57716	0.0131509	0.165203	-3.13586	THAP4	12	2.56778	0.0134185	0.168779
MDM4	-1.12224	0.0716524	-2.55625	0.0138634	0.169189	-3.18159	MDM4	8	-2.56731	0.0134345	0.168779
SNRNP48	0.361504	-0.0547692	2.5648	0.013568	0.167977	-3.16293	SNRNP48	23	2.56728	0.0134355	0.168779
TDP2	0.404646	0.00846989	2.53853	0.014494	0.172718	-3.22009	TDP2	46	2.56727	0.0134356	0.168779
VCL	0.705798	0.447116	2.53446	0.0146426	0.173744	-3.22891	VCL	265	2.5658	0.0134858	0.168962
TTC39C	-0.909222	0.293708	-2.54515	0.0142556	0.170975	-3.20574	TTC39C	49	-2.56572	0.0134883	0.168962
MBLAC2	0.607281	0.256249	2.54879	0.0141258	0.170266	-3.19782	MBLAC2	28	2.56452	0.0135295	0.168962
KIAA1586	0.443198	-0.0858932	2.58164	0.0130027	0.163977	-3.12603	KIAA1586	11	2.56448	0.0135307	0.168962
FKRP	0.461727	-0.0149028	2.64754	0.0109925	0.147761	-2.98002	FKRP	3	2.56433	0.0135359	0.168962
PCDH10	-2.49051	-1.10336	-2.74508	0.013743	0.169189	-2.82919	PCDH10	1	-2.74035	0.0135412	0.168962
EVI5	1.03796	0.279565	2.54852	0.0141353	0.170266	-3.1984	EVI5	12	2.56084	0.0136558	0.170201
MKRN1	-0.367001	0.0768054	-2.59783	0.0124799	0.159656	-3.09041	MKRN1	10	-2.55967	0.0136961	0.170512
COIL	0.409808	0.0603344	2.52849	0.014863	0.175239	-3.24183	COIL	49	2.5584	0.01374	0.170579
TRGC2	-1.79864	-2.26288	-2.54638	0.0142114	0.170813	-3.20305	TRGC2	3	-2.5582	0.0137471	0.170579
SNAPIN	-0.386853	0.10444	-2.56614	0.0135222	0.167784	-3.16	SNAPIN	17	-2.55814	0.0137491	0.170579
APPL2	-0.507074	0.0148632	-2.5533	0.0139665	0.169705	-3.18801	APPL2	18	-2.55774	0.0137628	0.170579
PPT2	1.11615	-0.0130428	2.6083	0.0129235	0.163824	-3.03025	PPT2	1	2.57882	0.0138229	0.171134
GANAB	0.290216	0.0825525	2.45541	0.0178162	0.192146	-3.39809	GANAB	434	2.55398	0.0138941	0.171823
KBTBD2	-0.512054	0.0455033	-2.55347	0.0139606	0.169705	-3.18764	KBTBD2	14	-2.55173	0.013973	0.172488
RAB30	-1.45281	-0.0457102	-2.54118	0.0143982	0.171944	-3.21435	RAB30	4	-2.55156	0.0139788	0.172488
C16orf74	-1.38471	0.45225	-2.64041	0.0135668	0.167977	-3.03181	C16orf74	1	-2.62224	0.0140107	0.172659
LRP1	1.13015	0.405244	2.55286	0.013982	0.169705	-3.18897	LRP1	2	2.55004	0.0140325	0.172659
NUDT1	-0.499163	0.0643258	-2.5196	0.0151968	0.177137	-3.26102	NUDT1	61	-2.54903	0.0140682	0.172659
MYSM1	0.36903	-0.0011525	2.52609	0.0149525	0.17555	-3.24702	MYSM1	37	2.54896	0.0140707	0.172659
JAML	-1.58912	-0.185387	-3.01387	0.010673	0.14522	-2.55026	JAML	1	-2.84082	0.0140801	0.172659
TPD52L2	0.525645	0.216897	2.51257	0.0154654	0.178189	-3.27616	TPD52L2	121	2.54851	0.0140867	0.172659
MACROD1	0.570955	0.195231	2.53472	0.0146331	0.173744	-3.22835	MACROD1	25	2.5481	0.0141013	0.172659
PRUNE2	1.38971	0.177757	2.54791	0.014157	0.170343	-3.19973	PRUNE2	1	2.54548	0.0141945	0.173458
TNFAIP1	-0.646879	0.0754993	-2.66074	0.0109853	0.147761	-2.94021	TNFAIP1	1	-2.5567	0.0141977	0.173458
RXYLT1	0.618985	-0.102964	2.66524	0.0109431	0.147454	-2.96319	RXYLT1	1	2.55835	0.0142313	0.173643
FCGR2B	-2.62702	-1.26626	-2.57178	0.0149456	0.17555	-3.17882	FCGR2B	1	-2.58886	0.0142441	0.173643
ATP8A1	0.885336	0.357222	2.52044	0.015165	0.17711	-3.25921	ATP8A1	74	2.54293	0.0142857	0.17396
SARDH	-0.751342	-0.275196	-2.5446	0.0142751	0.171024	-3.20692	SARDH	6	-2.54244	0.0143032	0.173983
CHKA	0.523063	-0.106146	2.53529	0.0146125	0.173744	-3.22713	CHKA	19	2.5419	0.0143226	0.174029
CLEC14A	1.70042	0.0353107	2.53028	0.0147966	0.175202	-3.23796	CLEC14A	3	2.54137	0.014342	0.174074
NDC80	-0.578333	-0.245351	-2.50776	0.0156519	0.179369	-3.2865	NDC80	98	-2.53875	0.0144364	0.175029
B3GAT3	-0.351833	-0.0625223	-2.55677	0.0138453	0.169189	-3.18046	B3GAT3	15	-2.537	0.0145	0.17561
CRTAP	0.606233	0.000193986	2.51589	0.015338	0.177884	-3.26901	CRTAP	38	2.53597	0.0145377	0.175803
FAM111B	-1.01323	0.104309	-2.51464	0.0153861	0.178012	-3.27172	FAM111B	68	-2.5357	0.0145476	0.175803
TYMP	-1.79594	-1.79466	-2.52319	0.0150613	0.17643	-3.25328	TYMP	3	-2.53499	0.0145734	0.175924
GPATCH2	0.511784	0.0194253	2.5272	0.0149112	0.17555	-3.24463	GPATCH2	19	2.53337	0.0146329	0.176221
TDRD3	-0.384343	-0.0744473	-2.50222	0.0158692	0.180783	-3.2984	TDRD3	49	-2.53316	0.0146404	0.176221
C6orf47	-0.593544	-0.161956	-2.57279	0.0132971	0.166288	-3.14544	C6orf47	3	-2.53302	0.0146455	0.176221
GOLGA7	-0.227007	-0.0177725	-2.55074	0.0140566	0.170263	-3.19357	GOLGA7	23	-2.53006	0.0147545	0.177341
FRA10AC1	0.438962	-0.175726	2.51576	0.0153431	0.177884	-3.2693	FRA10AC1	28	2.52922	0.0147857	0.177524
AUP1	0.490744	-0.0848362	2.51508	0.0153693	0.178002	-3.27077	AUP1	26	2.52771	0.0148416	0.177768
BMPR2	0.780666	0.108403	2.52225	0.0150966	0.176497	-3.25531	BMPR2	9	2.5274	0.0148534	0.177768
ANKLE2	0.345715	0.00776393	2.47271	0.0170726	0.188323	-3.36141	ANKLE2	104	2.52738	0.0148539	0.177768
CSRP3	-1.07337	-0.361807	-2.54029	0.0144302	0.172141	-3.21627	CSRP3	1	-2.52447	0.0149626	0.178796
CFAP99	-2.41207	0.246398	-8.61982	0.000865673	0.0371579	-1.31407	CFAP99	1	-3.70473	0.0149907	0.178796
COMT	0.559301	0.220007	2.48935	0.0163843	0.184759	-3.32595	COMT	136	2.52341	0.0150023	0.178796
GC	-1.29396	0.117989	-2.51283	0.0154554	0.178189	-3.2756	GC	5	-2.52293	0.0150204	0.178796
FDXR	-0.779238	-0.0546186	-2.50106	0.0159148	0.181117	-3.30088	FDXR	56	-2.52293	0.0150205	0.178796
ATP2C1	0.410642	-0.189045	2.49059	0.0163339	0.184565	-3.3233	ATP2C1	55	2.5224	0.0150402	0.178796
VMAC	-0.863988	0.220547	-2.55643	0.013857	0.169189	-3.18119	VMAC	1	-2.52187	0.0150602	0.178796
MARF1	-0.308277	0.0562411	-2.4806	0.0167429	0.186732	-3.34461	MARF1	53	-2.52156	0.015072	0.178796
STARD10	0.98356	-0.0226376	2.53011	0.0148031	0.175202	-3.23834	STARD10	2	2.52123	0.0150844	0.178796
TAPBP	-0.371815	0.0011585	-2.55069	0.0140585	0.170263	-3.19369	TAPBP	11	-2.52052	0.0151112	0.178923
UTP23	0.454038	0.154633	2.51954	0.0151991	0.177137	-3.26115	UTP23	17	2.51935	0.0151556	0.179163
FYN	0.729439	-0.44291	2.50897	0.015605	0.179369	-3.28391	FYN	16	2.51913	0.0151637	0.179163
IGHD	-2.15735	-0.502577	-2.50376	0.0158083	0.180458	-3.29509	IGHD	4	-2.51824	0.0151975	0.179373
SYNRG	-0.337977	-0.079518	-2.46195	0.0175318	0.191867	-3.38425	SYNRG	104	-2.51779	0.0152148	0.179387
PAPSS1	0.449323	-0.0146004	2.47276	0.0170705	0.188323	-3.3613	PAPSS1	138	2.51547	0.0153032	0.180134
KBTBD7	-0.955373	-0.476626	-2.51883	0.0152261	0.177232	-3.26269	KBTBD7	3	-2.51527	0.0153106	0.180134
RAB34	1.50971	0.83701	2.49672	0.0160874	0.18252	-3.31018	RAB34	33	2.51453	0.0153393	0.180281
S100A8	-1.15723	-0.151437	-2.51327	0.0154388	0.178189	-3.27467	S100A8	2	-2.51203	0.0154349	0.180967
ELP2	0.375698	0.0394607	2.47914	0.0168036	0.187004	-3.34773	ELP2	52	2.51184	0.0154423	0.180967
DOCK6	-1.76877	-0.88397	-2.50603	0.0157193	0.179627	-3.29022	DOCK6	1	-2.51174	0.0154464	0.180967
TAF1B	0.472805	-0.00376064	2.51402	0.01541	0.178103	-3.27305	TAF1B	14	2.50965	0.0155271	0.181479
KMT2C	-0.830629	0.0239147	-2.48667	0.0164935	0.185352	-3.33168	KMT2C	68	-2.50891	0.0155556	0.181479
SRPK2	0.383834	-0.15454	2.46839	0.0172556	0.189591	-3.37058	SRPK2	74	2.5089	0.0155562	0.181479
DHDDS	0.526979	-0.198589	2.51849	0.0152391	0.177232	-3.26343	DHDDS	9	2.50867	0.0155652	0.181479
ZNF329	-0.760068	-0.166354	-2.55765	0.0138146	0.169189	-3.17853	ZNF329	1	-2.50819	0.0155835	0.181479
LTN1	0.414095	0.113152	2.4687	0.0172427	0.189591	-3.36994	LTN1	83	2.50808	0.0155879	0.181479
MED7	-0.25756	0.114834	-2.529	0.0148441	0.175202	-3.24073	MED7	20	-2.50558	0.0156854	0.182381
MCTS2P	0.857729	0.135592	2.50802	0.0156419	0.179369	-3.28595	MCTS2P	4	2.50477	0.0157169	0.182381
CIITA	-1.10202	0.454722	-2.50744	0.0156646	0.179369	-3.2872	CIITA	2	-2.50437	0.0157328	0.182381
RUBCN	-0.597212	0.132706	-2.50609	0.0157172	0.179627	-3.2901	RUBCN	10	-2.50431	0.015735	0.182381
NUDT15	-0.545345	-0.0757703	-2.50274	0.0158485	0.180731	-3.29727	NUDT15	14	-2.504	0.0157474	0.182381
TBC1D10C	-1.05075	-0.208492	-2.48807	0.0164364	0.184972	-3.32869	TBC1D10C	17	-2.5025	0.0158063	0.18239
CASP9	-0.483915	0.0933229	-2.50987	0.01557	0.179208	-3.28197	CASP9	12	-2.50239	0.0158104	0.18239
EEA1	0.382815	0.0572462	2.44646	0.018212	0.194716	-3.41697	EEA1	196	2.50209	0.0158225	0.18239
POLR3A	0.37224	0.092762	2.44993	0.0180578	0.193812	-3.40967	POLR3A	127	2.50185	0.0158319	0.18239
TGFBRAP1	-0.365265	0.119822	-2.47569	0.0169475	0.187894	-3.35507	TGFBRAP1	41	-2.50168	0.0158384	0.18239
ETS1	-0.74045	-0.879289	-2.48602	0.0165202	0.185352	-3.33307	ETS1	26	-2.50148	0.0158464	0.18239
SCMH1	0.561529	0.173456	2.49346	0.0162181	0.183629	-3.31716	SCMH1	16	2.4985	0.0159644	0.183557
NOMO1	1.14041	-0.192264	2.49208	0.0162739	0.184073	-3.32012	NOMO1	4	2.49805	0.0159823	0.183574
ALB	-1.02024	-0.401272	-2.47878	0.0168186	0.187004	-3.34849	ALB	34	-2.49663	0.0160389	0.183716
PHKG2	-0.390072	0.129998	-2.48821	0.0164307	0.184972	-3.32839	PHKG2	25	-2.49648	0.0160449	0.183716
SLC6A3	-3.13375	0.0970002	-3.06523	0.0177919	0.192146	-2.83242	SLC6A3	1	-3.06017	0.016058	0.183716
ZNF664	0.466342	0.141514	2.667	0.0104556	0.143425	-2.93637	ZNF664	1	2.49608	0.0160607	0.183716
FBXO25	-0.799009	-0.627897	-2.53721	0.0145422	0.173107	-3.22296	FBXO25	1	-2.49524	0.0160941	0.183835
INPP5B	-0.366157	-0.00747961	-2.46037	0.0175999	0.192061	-3.38758	INPP5B	55	-2.49499	0.0161042	0.183835
SHANK3	2.30843	0.00148006	2.49088	0.0166701	0.186658	-3.33347	SHANK3	1	2.50256	0.0161364	0.184015
TADA2A	0.272796	0.0161743	2.60946	0.0121164	0.157358	-3.06473	TADA2A	7	2.49358	0.0161609	0.184106
MGA	-0.571669	-0.2093	-2.45875	0.0176703	0.192061	-3.39101	MGA	129	-2.49097	0.016266	0.185113
MYO18B	-1.91994	-0.866754	-2.47499	0.0169767	0.187902	-3.35655	MYO18B	6	-2.48973	0.016316	0.185492
R3HDM2	0.395537	-0.0263565	2.50818	0.0156356	0.179369	-3.28561	R3HDM2	12	2.48845	0.016368	0.185894
C15orf39	-0.423713	-0.201657	-2.48037	0.0167525	0.186732	-3.34511	C15orf39	23	-2.48761	0.0164021	0.186091
TRIM21	-0.443184	-0.0608534	-2.46703	0.0173137	0.190041	-3.37348	TRIM21	36	-2.48706	0.0164245	0.186156
PCF11	-0.212095	0.0592504	-2.37837	0.0214947	0.210616	-3.55901	PCF11	100	-2.48365	0.0165639	0.187545
CHEK2	0.482411	0.147011	2.45643	0.0177716	0.192146	-3.39593	CHEK2	50	2.48212	0.0166272	0.18793
MYORG	-0.984522	-0.208047	-2.48374	0.0166133	0.18621	-3.33792	MYORG	3	-2.48201	0.0166317	0.18793
STXBP1	0.741436	-0.122204	2.45939	0.0176425	0.192061	-3.38966	STXBP1	42	2.47908	0.0167526	0.189104
RXRA	-1.03767	-0.401559	-2.478	0.0168509	0.187177	-3.35015	RXRA	3	-2.47826	0.0167867	0.189296
PRKCA	1.17397	-0.729348	2.46006	0.0176137	0.192061	-3.38826	PRKCA	29	2.47713	0.016834	0.189638
MTM1	-0.696543	0.248766	-2.45657	0.0177655	0.192146	-3.39564	MTM1	40	-2.47607	0.016878	0.189823
TTC17	0.348902	-0.0394234	2.4735	0.0170395	0.188323	-3.35973	TTC17	23	2.47591	0.0168846	0.189823
ELF4	-0.425779	-0.0822305	-2.60234	0.0123379	0.158752	-3.08047	ELF4	2	-2.47529	0.0169107	0.18984
ADAM23	-2.29921	-0.451959	-2.55673	0.0175907	0.192061	-3.17186	ADAM23	1	-2.56854	0.0169202	0.18984
CNOT8	-0.395904	0.183877	-2.48018	0.0167606	0.186732	-3.34552	CNOT8	16	-2.47284	0.0170132	0.190461
PSMB8	-0.361603	0.0149556	-2.42669	0.0191151	0.198946	-3.45853	PSMB8	89	-2.47276	0.0170169	0.190461
HOXA11	-2.42986	0.0886722	-6.97768	0.00197503	0.0570962	-1.59089	HOXA11	1	-3.57939	0.0170269	0.190461
C11orf54	0.72764	0.39369	2.45958	0.0176343	0.192061	-3.38926	C11orf54	15	2.46905	0.0171734	0.191749
ZNF175	1.02543	-0.0641299	2.48608	0.0165177	0.185352	-3.33294	ZNF175	1	2.46898	0.0171764	0.191749
TECR	0.391719	0.0971558	2.43314	0.0188163	0.198132	-3.44501	TECR	64	2.4684	0.017201	0.191831
ZDHHC7	-0.616748	-0.259849	-2.56646	0.0138287	0.169189	-3.17167	ZDHHC7	1	-2.47546	0.017247	0.192116
GRIPAP1	-0.37684	0.0491299	-2.41478	0.0196785	0.201492	-3.48345	GRIPAP1	155	-2.46699	0.0172611	0.192116
DMXL1	-0.388984	-0.0495976	-2.42464	0.019211	0.199272	-3.46283	DMXL1	86	-2.46602	0.0173025	0.192251
TBC1D16	0.960971	0.19437	2.50266	0.016195	0.183554	-3.27813	TBC1D16	1	2.47402	0.0173078	0.192251
LRRFIP2	0.628402	-0.121237	2.4419	0.0184167	0.19559	-3.42658	LRRFIP2	50	2.46403	0.0173878	0.192947
NTPCR	-0.550804	0.290445	-2.44392	0.0183257	0.195491	-3.42232	NTPCR	31	-2.46044	0.0175423	0.194403
KLHDC10	1.1216	0.116758	2.47125	0.0171344	0.188818	-3.36452	KLHDC10	1	2.46017	0.0175539	0.194403
P3H1	0.456947	0.0193599	2.42974	0.0189733	0.19857	-3.45215	P3H1	59	2.45878	0.0176144	0.194747
NKAPD1	0.412466	-0.0538691	2.46606	0.0173551	0.190307	-3.37553	NKAPD1	15	2.45865	0.0176199	0.194747
ERAP1	-0.603112	0.00851402	-2.42623	0.0191368	0.198946	-3.45951	ERAP1	188	-2.45812	0.0176429	0.194807
GRAP	-0.829755	0.16843	-2.4431	0.018363	0.195491	-3.42407	GRAP	22	-2.45755	0.0176679	0.19489
CCDC130	0.267243	0.0716561	2.45879	0.0176687	0.192061	-3.39094	CCDC130	25	2.45699	0.0176924	0.194902
INPP5K	-0.512738	0.0267892	-2.44795	0.0181454	0.194312	-3.41383	INPP5K	21	-2.45672	0.0177041	0.194902
TRMT13	0.311122	0.0919019	2.47482	0.0169838	0.187902	-3.35691	TRMT13	17	2.45625	0.0177246	0.194936
TMEM131	0.331689	-0.0425275	2.44193	0.0184155	0.19559	-3.42652	TMEM131	30	2.45538	0.0177628	0.195041
CNBP	0.26687	0.0414692	2.37419	0.0217122	0.211609	-3.56762	CNBP	135	2.45502	0.0177785	0.195041
SREK1IP1	0.371016	0.0359903	2.48193	0.0166879	0.18667	-3.34178	SREK1IP1	11	2.45483	0.0177868	0.195041
BRD7	0.259237	0.0840019	2.38032	0.0213933	0.210529	-3.55497	BRD7	96	2.45394	0.0178256	0.195274
WAS	-0.456692	-0.0352132	-2.42569	0.0191618	0.198946	-3.46063	WAS	53	-2.45281	0.0178752	0.195626
ZNF277	0.493753	-0.182765	2.4538	0.0178869	0.192721	-3.40149	ZNF277	14	2.45225	0.0178999	0.195703
IGHV6-1	-3.96087	-1.51809	-2.45253	0.0188729	0.198353	-3.3549	IGHV6-1	1	-2.47055	0.0179921	0.196168
MAP3K12	1.55963	-0.285306	3.35067	0.00984544	0.139592	-2.38832	MAP3K12	1	2.90032	0.0179961	0.196168
INAVA	-2.47248	0.16335	-6.23406	0.00303947	0.0751762	-1.76822	INAVA	1	-3.52561	0.0179967	0.196168
LNPEP	-0.437262	0.00225211	-2.4081	0.0200008	0.203111	-3.49737	LNPEP	130	-2.44908	0.0180399	0.196168
PKN2	0.269656	0.135294	2.39908	0.0204439	0.205919	-3.51614	PKN2	59	2.44904	0.018042	0.196168
MYO19	0.662408	-0.167095	2.4477	0.0181568	0.194312	-3.41437	MYO19	9	2.4489	0.0180482	0.196168
ACTA1	-0.48327	-0.00306306	-2.64719	0.0113684	0.150991	-2.97001	ACTA1	1	-2.45844	0.0180775	0.196295
VPS26C	-1.02949	-0.143526	-2.43459	0.0187496	0.197804	-3.44196	VPS26C	13	-2.44719	0.0181242	0.196302
AP4M1	0.2988	0.0659109	2.46849	0.0172516	0.189591	-3.37038	AP4M1	17	2.44718	0.0181243	0.196302
PHOSPHO2	0.625991	-0.0894717	2.52283	0.015075	0.17643	-3.25407	PHOSPHO2	1	2.44665	0.0181484	0.196302
SDCCAG8	-0.443583	0.0788494	-2.42701	0.0191001	0.198946	-3.45786	SDCCAG8	36	-2.44664	0.0181487	0.196302
ARGLU1	-0.300274	0.124384	-2.39719	0.0205375	0.206488	-3.52005	ARGLU1	67	-2.44535	0.0182064	0.196735
RPF2	0.426596	-0.0407035	2.41888	0.0194829	0.200782	-3.47488	RPF2	45	2.44392	0.0182702	0.197104
ATF3	-0.564733	-0.225383	-2.54184	0.0143743	0.171843	-3.21292	ATF3	1	-2.44321	0.0183022	0.197104
MZF1	0.722932	0.128347	2.59616	0.0140997	0.170266	-3.08681	MZF1	1	2.4832	0.0183107	0.197104
DNAJC12	1.81266	-0.493891	2.43108	0.0189114	0.198569	-3.44934	DNAJC12	3	2.44297	0.0183129	0.197104
GNG11	1.69746	0.124275	2.46682	0.0186527	0.197343	-3.38049	GNG11	1	2.47173	0.0183379	0.197104
RILP	-1.17771	-0.0344105	-2.48317	0.017799	0.192146	-3.34294	RILP	1	-2.46832	0.0183468	0.197104
KIF21B	-0.6624	-0.376681	-2.42227	0.0193223	0.199867	-3.46778	KIF21B	33	-2.43962	0.018464	0.19812
FAM185A	-0.808671	-0.174815	-2.44937	0.0180825	0.193891	-3.41085	FAM185A	3	-2.43934	0.018477	0.19812
BCAR3	-1.80343	-0.154145	-2.44062	0.0188433	0.198229	-3.40814	BCAR3	1	-2.44667	0.0185022	0.1982
ECHS1	-0.655184	0.323158	-2.40877	0.0199681	0.203111	-3.49597	ECHS1	159	-2.43737	0.0185664	0.198696
CEP112	0.907677	0.0467105	2.42613	0.0191414	0.198946	-3.45971	CEP112	12	2.43682	0.0185912	0.198771
INTU	1.15176	0.64982	3.01512	0.0116196	0.152328	-2.62277	INTU	1	2.72593	0.0186476	0.198812
PRPSAP2	-0.335478	-0.00366455	-2.39295	0.02075	0.208001	-3.52886	PRPSAP2	68	-2.43508	0.0186708	0.198812
CDKN2A	1.41797	0.241473	2.43497	0.0187319	0.197804	-3.44115	CDKN2A	1	2.43504	0.0186728	0.198812
AFAP1L2	-1.62694	-1.27341	-2.43024	0.0189499	0.19857	-3.45108	AFAP1L2	1	-2.43447	0.0186988	0.198812
ATXN7L3B	0.40769	-0.0213745	2.45607	0.0177873	0.192146	-3.39669	ATXN7L3B	10	2.43441	0.0187018	0.198812
TMEM50B	-0.965249	-0.413803	-2.45333	0.0179072	0.192754	-3.40247	TMEM50B	1	-2.43314	0.0187597	0.198812
RP2	-0.472398	0.323417	-2.41079	0.0198703	0.202709	-3.49176	RP2	42	-2.43302	0.0187653	0.198812
MCF2L	-1.57655	-0.630031	-2.43922	0.0190109	0.198678	-3.44473	MCF2L	1	-2.44284	0.0187752	0.198812
MLYCD	-0.760451	0.27918	-2.41609	0.0196157	0.201219	-3.48071	MLYCD	30	-2.43257	0.0187861	0.198812
NGLY1	-0.589924	0.19171	-2.40836	0.0199883	0.203111	-3.49683	NGLY1	58	-2.43218	0.018804	0.198812
DNAJB2	-0.82177	-0.0829484	-2.42961	0.0189793	0.19857	-3.45242	DNAJB2	6	-2.43211	0.0188072	0.198812
THUMPD2	0.457195	0.178913	2.42424	0.0192298	0.199281	-3.46367	THUMPD2	22	2.43206	0.0188094	0.198812
ZNF32	0.808282	0.111175	2.44134	0.0184423	0.195674	-3.42777	ZNF32	3	2.43149	0.0188358	0.198901
PARP8	-0.572344	-0.198948	-2.45676	0.0177573	0.192146	-3.39524	PARP8	4	-2.43033	0.0188892	0.199277
NAA25	0.394085	0.0913789	2.38762	0.0210194	0.209254	-3.5399	NAA25	99	2.42937	0.0189337	0.199557
BTBD10	-0.322818	-0.112903	-2.52926	0.0148345	0.175202	-3.24017	BTBD10	5	-2.42784	0.0190049	0.200057
DUSP14	0.51086	0.115126	2.44353	0.0183437	0.195491	-3.42317	DUSP14	7	2.42754	0.0190186	0.200057
FARSB	0.308494	0.0231421	2.35349	0.0228205	0.218515	-3.61012	FARSB	255	2.42701	0.0190437	0.200057
CHP1	0.368225	0.0516471	2.40545	0.0201303	0.203867	-3.5029	CHP1	37	2.42681	0.019053	0.200057
MGLL	-1.60315	-1.69668	-2.44632	0.01943	0.200608	-3.44932	MGLL	1	-2.45093	0.0191231	0.200604
CMSS1	0.413107	0.126451	2.40266	0.0202671	0.204694	-3.5087	CMSS1	37	2.42312	0.0192257	0.20149
SYN1	2.29661	-0.791553	2.6482	0.0189828	0.19857	-3.04882	SYN1	1	2.62587	0.0192504	0.201492
LDHB	0.431881	-0.0448518	2.37946	0.0214382	0.210616	-3.55676	LDHB	159	2.42201	0.0192778	0.201492
RAC1	-0.460151	0.0602075	-2.42571	0.0191608	0.198946	-3.46058	RAC1	14	-2.42186	0.0192847	0.201492
ATP6V0C	-0.862066	0.180814	-2.49436	0.0169493	0.187894	-3.2505	ATP6V0C	1	-2.43851	0.0193062	0.201492
ZNF587B	0.643558	0.166948	2.71535	0.0111892	0.149683	-2.81142	ZNF587B	1	2.47731	0.0193547	0.201492
PTP4A3	-1.32336	0.0292296	-2.41612	0.0196144	0.201219	-3.48065	PTP4A3	2	-2.42029	0.0193591	0.201492
STRN4	0.244952	-0.0428537	2.379	0.0214618	0.210616	-3.55771	STRN4	46	2.4201	0.0193677	0.201492
CAPNS1	-0.346536	0.105356	-2.369	0.0219856	0.213207	-3.57831	CAPNS1	112	-2.41965	0.019389	0.201492
BTF3L4	0.511445	0.204501	2.39269	0.0207628	0.208001	-3.52938	BTF3L4	61	2.41909	0.0194156	0.201492
COL6A2	-1.51329	0.00768416	-2.4553	0.0196706	0.201492	-3.44762	COL6A2	1	-2.45775	0.0194378	0.201492
KPNA5	0.616287	-0.104381	2.43803	0.0185923	0.196891	-3.43473	KPNA5	4	2.41823	0.0194567	0.201492
TPD52	1.01798	0.0594714	2.42259	0.0193072	0.199867	-3.46711	TPD52	2	2.41776	0.019479	0.201492
HBB	-1.74691	-0.56659	-2.42196	0.0198189	0.202371	-3.4494	HBB	1	-2.42745	0.0194873	0.201492
TTC26	0.545717	0.0535436	2.40852	0.0199806	0.203111	-3.4965	TTC26	20	2.41754	0.0194892	0.201492
ANKRD33B	-1.29827	-0.0123977	-2.53775	0.0187039	0.197697	-3.28107	ANKRD33B	1	-2.51275	0.01951	0.201492
UTP15	0.36594	0.0178523	2.38311	0.0212496	0.210042	-3.54921	UTP15	58	2.41699	0.0195156	0.201492
FARSA	0.280732	0.00139461	2.34095	0.0235162	0.22074	-3.63573	FARSA	154	2.41584	0.0195702	0.201643
PBLD	-0.909624	0.343684	-2.40751	0.0200298	0.20322	-3.49861	PBLD	8	-2.41558	0.0195827	0.201643
RDH10	1.04152	-0.883899	2.41934	0.0194608	0.20074	-3.47391	RDH10	2	2.41554	0.0195845	0.201643
BCL7C	-0.616939	-0.0646504	-2.41738	0.0195541	0.200957	-3.47801	BCL7C	8	-2.41477	0.0196216	0.201718
TMCO3	-0.708734	-0.00266397	-2.44289	0.0183723	0.195491	-3.4245	TMCO3	2	-2.41424	0.0196468	0.201718
SDHC	0.568793	0.0230958	2.45131	0.0179964	0.19334	-3.40674	SDHC	3	2.41403	0.0196567	0.201718
TSEN2	0.395207	0.125401	2.41391	0.0197201	0.201547	-3.48526	TSEN2	19	2.41388	0.0196643	0.201718
ETNK1	0.572609	-0.215282	2.40156	0.0203211	0.205054	-3.51098	ETNK1	22	2.4128	0.0197159	0.202061
BTBD11	-1.60127	-0.319618	-2.39487	0.0206537	0.207282	-3.52488	BTBD11	14	-2.41022	0.0198401	0.203146
MUTYH	0.685427	-0.0412039	2.55362	0.0152968	0.177718	-3.16387	MUTYH	1	2.43974	0.0199365	0.203766
ARID5B	-0.845379	0.160001	-2.39003	0.0208971	0.208971	-3.5349	ARID5B	38	-2.408	0.0199478	0.203766
SUGT1	-0.378209	-0.111259	-2.36051	0.0224392	0.216233	-3.59575	SUGT1	131	-2.40756	0.0199694	0.203766
WWP2	-0.353978	0.01804	-2.38601	0.0211016	0.209342	-3.54323	WWP2	37	-2.40747	0.0199738	0.203766
PITPNA	-0.550422	0.0823829	-2.38036	0.0213917	0.210529	-3.55491	PITPNA	71	-2.40683	0.0200049	0.203897
DCTN3	-0.293293	-0.00990213	-2.40892	0.0199609	0.203111	-3.49566	DCTN3	23	-2.40627	0.0200321	0.203986
PPP1R2	-0.487709	-0.053944	-2.40112	0.0203429	0.205087	-3.5119	PPP1R2	18	-2.40586	0.0200519	0.204002
ZC3H12D	-0.912359	0.533261	-2.38934	0.0209321	0.209133	-3.53634	ZC3H12D	25	-2.40482	0.020103	0.204334
CHMP4A	-0.427755	-0.165023	-2.42119	0.0193734	0.200209	-3.47005	CHMP4A	9	-2.40125	0.0202783	0.205928
ARF6	-0.270942	0.0521329	-2.34407	0.0233417	0.219945	-3.62938	ARF6	73	-2.40008	0.0203362	0.206328
TMEM120B	0.520908	0.0683923	2.40497	0.0201534	0.203915	-3.50388	TMEM120B	10	2.39936	0.0203714	0.206497
TYK2	-0.410388	-0.000665828	-2.37759	0.021535	0.210616	-3.56062	TYK2	38	-2.39849	0.0204145	0.206746
BTK	-1.04899	0.42275	-2.37707	0.021562	0.210616	-3.56169	BTK	88	-2.39714	0.0204818	0.207114
TKT	0.378359	0.161381	2.33832	0.0236646	0.221334	-3.64109	TKT	629	2.39701	0.0204881	0.207114
LIME1	-0.899387	-1.06948	-2.39609	0.0205925	0.206854	-3.52234	LIME1	4	-2.39638	0.0205193	0.20724
DCAF11	-0.412414	-0.116263	-2.38616	0.0210934	0.209342	-3.5429	DCAF11	25	-2.39569	0.0205537	0.20724
BCL9L	0.70015	0.184462	2.38576	0.0211142	0.209342	-3.54375	BCL9L	16	2.39556	0.0205604	0.20724
ZNF7	0.499926	0.151545	2.43346	0.0188015	0.198132	-3.44434	ZNF7	4	2.39527	0.0205751	0.20724
POLR3F	0.340663	0.00709766	2.41426	0.0197034	0.201547	-3.48453	POLR3F	14	2.39384	0.0206463	0.20777
CDC16	-0.399483	-0.157328	-2.36243	0.022336	0.215611	-3.59181	CDC16	58	-2.39304	0.0206864	0.20777
CISD3	0.544729	0.0944819	2.45272	0.0179341	0.192857	-3.40376	CISD3	2	2.39282	0.0206976	0.20777
DACT1	-1.63099	0.169884	-2.41638	0.0210079	0.209254	-3.48279	DACT1	1	-2.42048	0.0207024	0.20777
USP7	-0.21816	0.00141385	-2.26213	0.0283416	0.242835	-3.79423	USP7	396	-2.39171	0.0207532	0.208093
RBM6	0.2626	0.0625475	2.30976	0.0253301	0.228649	-3.69896	RBM6	160	2.39134	0.0207721	0.208095
CCDC182	-1.56714	-0.270884	-2.39792	0.0209964	0.209254	-3.49873	CCDC182	1	-2.4004	0.0207984	0.208171
GNGT2	-0.8224	-0.772733	-2.3977	0.0205125	0.206424	-3.51901	GNGT2	3	-2.38982	0.0208485	0.208485
ZNF777	-0.506245	-0.140618	-2.4394	0.0185301	0.196419	-3.43185	ZNF777	3	-2.38923	0.0208784	0.208596
SLC35A5	-0.422614	0.0510247	-2.5755	0.0132065	0.165341	-3.13952	SLC35A5	1	-2.38846	0.0209173	0.208798
FAM118B	-0.409571	-0.03951	-2.38189	0.0213128	0.210293	-3.55175	FAM118B	22	-2.3877	0.020956	0.208799
NAB1	0.64133	-0.0813059	2.37643	0.0215951	0.210652	-3.563	NAB1	19	2.38708	0.0209879	0.208799
FAM102B	-0.743714	0.135459	-2.37856	0.0214845	0.210616	-3.55861	FAM102B	13	-2.38705	0.0209891	0.208799
TRPM7	0.469132	0.123469	2.37755	0.0215369	0.210616	-3.56069	TRPM7	23	2.38698	0.0209925	0.208799
CPEB4	1.94072	-1.01613	2.44413	0.0208078	0.208266	-3.23744	CPEB4	1	2.43404	0.0211413	0.20998
SH3BGRL3	-0.417111	-0.0806859	-2.3521	0.0228968	0.218561	-3.61297	SH3BGRL3	67	-2.38392	0.0211489	0.20998
DENND2D	-1.05785	-0.178377	-2.36903	0.021984	0.213207	-3.57825	DENND2D	17	-2.3831	0.0211909	0.210189
WT1	1.69775	-0.520302	2.37709	0.0215607	0.210616	-3.56164	WT1	1	2.38277	0.0212077	0.210189
DKC1	0.3127	0.203319	2.32249	0.0245751	0.224621	-3.67323	DKC1	134	2.38194	0.0212503	0.210423
PRNP	-0.866588	-0.120696	-2.37687	0.0215725	0.210616	-3.5621	PRNP	6	-2.38132	0.0212824	0.210554
AP1M1	-0.233021	-0.00589645	-2.30386	0.0256868	0.23056	-3.71084	AP1M1	89	-2.38084	0.0213069	0.210609
JAK1	-0.421016	0.230052	-2.34558	0.0232573	0.219927	-3.62629	JAK1	78	-2.37941	0.021381	0.211154
RIC8A	-0.300545	0.0384532	-2.3344	0.0238873	0.222296	-3.64907	RIC8A	65	-2.37863	0.0214212	0.211218
FAM162A	0.631457	0.109556	2.3613	0.0223969	0.216011	-3.59413	FAM162A	34	2.37855	0.0214255	0.211218
FUOM	-1.25114	-0.0495727	-2.37102	0.0218787	0.212858	-3.57415	FUOM	3	-2.37739	0.0214855	0.211622
PPM1K	-0.8609	0.147102	-2.3722	0.0218166	0.21244	-3.57172	PPM1K	6	-2.37653	0.0215303	0.211876
RIC1	-0.362367	0.214526	-2.38486	0.0211599	0.209342	-3.54559	RIC1	16	-2.37536	0.021591	0.212246
ACTR2	-0.363872	0.0811804	-2.32443	0.0244621	0.224269	-3.66931	ACTR2	161	-2.37495	0.0216123	0.212246
FPGS	-0.682903	0.191711	-2.35702	0.022628	0.217299	-3.6029	FPGS	36	-2.37471	0.021625	0.212246
PIK3CD	-0.687666	0.274276	-2.34735	0.0231591	0.219371	-3.62268	PIK3CD	102	-2.37185	0.0217749	0.213528
ATP6V1F	-0.341063	0.0142271	-2.35664	0.0226487	0.21731	-3.60368	ATP6V1F	31	-2.37135	0.0218012	0.213598
CCP110	-0.47627	0.0891457	-2.34412	0.0233386	0.219945	-3.62927	CCP110	59	-2.37051	0.0218455	0.213844
ABT1	0.342211	-0.0444503	2.35906	0.0225175	0.216612	-3.59872	ABT1	28	2.36982	0.0218819	0.214012
RUSC1	0.418132	0.022272	2.40566	0.0201201	0.203867	-3.50246	RUSC1	6	2.36866	0.0219433	0.214424
ADCY6	1.11752	0.314332	2.36802	0.0220376	0.213286	-3.58033	ADCY6	2	2.36771	0.0219933	0.214615
MAN2B1	-0.815533	0.0810857	-2.35076	0.0229706	0.218605	-3.61571	MAN2B1	33	-2.36756	0.0220014	0.214615
SUPT7L	-0.207061	-0.0184374	-2.49686	0.0160819	0.18252	-3.30989	SUPT7L	10	-2.36566	0.0221024	0.215412
LMO4	0.892829	0.117279	2.38798	0.0210013	0.209254	-3.53916	LMO4	1	2.36448	0.0221651	0.215833
PTPN23	-0.401471	0.0626071	-2.32374	0.0245023	0.224269	-3.6707	PTPN23	108	-2.36343	0.0222217	0.216125
ARPC5	-0.392407	0.0718088	-2.32825	0.0242406	0.223899	-3.66157	ARPC5	74	-2.3632	0.0222338	0.216125
DDX58	-0.79759	-0.0791686	-2.34162	0.023479	0.220711	-3.63438	DDX58	66	-2.36226	0.0222842	0.216425
RESF1	-0.337918	-0.0962913	-2.34952	0.023039	0.218605	-3.61825	RESF1	28	-2.36013	0.0223988	0.217264
SPATS2	0.581876	0.0859386	2.33871	0.0236429	0.221317	-3.64031	SPATS2	47	2.3596	0.0224275	0.217264
ACTG1	-0.868979	-0.690504	-2.35018	0.0230024	0.218605	-3.6169	ACTG1	9	-2.35853	0.0224852	0.217264
WDR43	0.345166	0.081482	2.32048	0.024693	0.224986	-3.6773	WDR43	65	2.35747	0.0225424	0.217264
ETFDH	0.482082	0.148987	2.33474	0.0238682	0.222296	-3.64838	ETFDH	46	2.35719	0.0225575	0.217264
CCNT1	0.302434	0.0939305	2.33595	0.0237992	0.221847	-3.64592	CCNT1	36	2.35708	0.0225636	0.217264
CD70	-1.67675	-0.438007	-2.34777	0.0231358	0.219337	-3.62183	CD70	2	-2.35701	0.0225674	0.217264
REPIN1	0.555412	-0.0621125	2.34977	0.023025	0.218605	-3.61773	REPIN1	17	2.35663	0.0225882	0.217264
TCERG1	0.21847	0.086284	2.24599	0.0294313	0.243738	-3.82614	TCERG1	198	2.35655	0.0225922	0.217264
CD58	-1.41986	0.295944	-2.34164	0.0234776	0.220711	-3.63433	CD58	14	-2.3563	0.0226061	0.217264
PLEKHH3	0.928063	-0.280286	2.40868	0.0210879	0.209342	-3.49136	PLEKHH3	1	2.37689	0.0226271	0.217264
SPI1	-1.27349	0.508454	-2.34692	0.0231825	0.219406	-3.62355	SPI1	4	-2.35573	0.0226368	0.217264
NCKIPSD	-0.525487	-0.0687737	-2.33936	0.0236057	0.221317	-3.63896	NCKIPSD	32	-2.35568	0.0226399	0.217264
CACFD1	-1.15623	-0.126532	-2.42042	0.0211467	0.209342	-3.37106	CACFD1	1	-2.3886	0.0226439	0.217264
ARPC1B	-0.689268	0.2534	-2.33743	0.0237153	0.221435	-3.64291	ARPC1B	36	-2.35494	0.0226801	0.217424
ARMC7	0.328236	-0.0669828	2.40376	0.0202131	0.204335	-3.50642	ARMC7	8	2.35402	0.0227305	0.21772
THOP1	0.397846	0.151291	2.30842	0.0254109	0.229193	-3.70167	THOP1	165	2.35283	0.0227953	0.217942
UGP2	-0.592218	0.0196761	-2.32159	0.0246279	0.224863	-3.67505	UGP2	246	-2.35241	0.0228186	0.217942
RMDN1	-0.411132	0.0893215	-2.32727	0.0242969	0.224197	-3.66354	RMDN1	47	-2.35223	0.0228281	0.217942
COQ8A	0.575714	0.492838	2.33791	0.0236877	0.221364	-3.64192	COQ8A	27	2.35199	0.0228414	0.217942
ANTKMT	-1.00584	-0.578604	-2.34401	0.0233447	0.219945	-3.62949	ANTKMT	6	-2.3518	0.0228516	0.217942
TOX	-0.929658	-1.15253	-2.33893	0.0236301	0.221317	-3.63984	TOX	12	-2.34997	0.0229526	0.218546
ANXA7	-0.332261	0.0368392	-2.29821	0.0260328	0.231944	-3.7222	ANXA7	123	-2.34982	0.0229606	0.218546
SIK3	0.335722	-0.0171403	2.32403	0.0244851	0.224269	-3.67011	SIK3	42	2.34958	0.0229739	0.218546
ADGRA3	0.923962	-0.0651411	2.34482	0.0232995	0.219945	-3.62784	ADGRA3	5	2.34913	0.0229986	0.218595
CTC1	-0.431603	-0.0716992	-2.35167	0.0229206	0.2186	-3.61386	CTC1	15	-2.34859	0.0230287	0.218694
OAT	-1.2159	-0.367306	-2.32913	0.0241896	0.223724	-3.65977	OAT	62	-2.34727	0.0231015	0.219199
TMEM222	0.399941	0.0459945	2.35292	0.0228519	0.218515	-3.61129	TMEM222	15	2.3466	0.023139	0.219367
UBE2R2	-0.290395	-0.144342	-2.36844	0.0220151	0.213253	-3.57945	UBE2R2	16	-2.34527	0.0232129	0.219709
ROPN1L	-1.41568	-0.0534274	-2.60072	0.0230288	0.218605	-3.28005	ROPN1L	2	-2.57709	0.0232146	0.219709
ORAI3	-0.936831	0.0423007	-2.37545	0.0221532	0.214218	-3.57607	ORAI3	1	-2.35369	0.0232512	0.219869
SMIM13	0.702159	-0.0782258	2.49394	0.0177991	0.192146	-3.25542	SMIM13	1	2.37659	0.0232821	0.219883
NDFIP2	-0.788068	-0.76222	-2.39196	0.0212979	0.210293	-3.54233	NDFIP2	1	-2.35294	0.0232922	0.219883
RRAS	1.01223	0.286282	2.3339	0.0239158	0.222375	-3.65008	RRAS	7	2.343	0.0233395	0.219994
PBRM1	0.292295	0.123688	2.26851	0.0279202	0.240893	-3.78155	PBRM1	282	2.34265	0.0233589	0.219994
TMED1	0.370851	0.249473	2.34377	0.023358	0.219945	-3.62997	TMED1	19	2.34257	0.0233632	0.219994
PPP1R3D	-0.640119	0.00812737	-2.35076	0.0229707	0.218605	-3.61572	PPP1R3D	5	-2.34171	0.0234116	0.220263
AK4	1.16445	0.192352	2.32239	0.0245812	0.224621	-3.67344	AK4	30	2.33865	0.0235836	0.221694
AKAP8	0.231705	0.0675114	2.27117	0.0277462	0.240249	-3.77626	AKAP8	73	2.3366	0.0237	0.2226
CDK4	0.579285	0.069006	2.32549	0.0244002	0.224257	-3.66715	CDK4	21	2.33622	0.0237212	0.222612
PRKCH	-1.10325	-1.04012	-2.32033	0.024702	0.224986	-3.67761	PRKCH	12	-2.33295	0.0239074	0.223822
ACTR6	0.199972	0.0584026	2.34085	0.0235218	0.22074	-3.63593	ACTR6	26	2.33224	0.0239484	0.223822
TRMT10A	0.384254	-0.0932847	2.33144	0.0240568	0.222985	-3.65509	TRMT10A	19	2.33162	0.0239835	0.223822
RAB3A	0.628636	0.137014	2.33216	0.0240156	0.22293	-3.65363	RAB3A	8	2.33159	0.0239851	0.223822
ABI1	-0.394435	0.26769	-2.30077	0.0258756	0.231248	-3.71706	ABI1	61	-2.33119	0.0240083	0.223822
TTC9	-1.31593	-0.211741	-2.31938	0.024758	0.225288	-3.67954	TTC9	6	-2.33084	0.0240281	0.223822
CFL1	-0.289997	0.159228	-2.25268	0.0289755	0.243738	-3.81294	CFL1	419	-2.33063	0.0240407	0.223822
ENTPD1	-2.21666	-1.72626	-2.3163	0.0249398	0.226043	-3.68576	ENTPD1	4	-2.33028	0.0240606	0.223822
SORBS3	-1.0247	-0.0953415	-2.31452	0.0250457	0.226796	-3.68936	SORBS3	27	-2.33021	0.0240645	0.223822
DCAF8	0.379719	0.125763	2.32568	0.0243895	0.224257	-3.66678	DCAF8	22	2.33018	0.0240665	0.223822
AFTPH	-0.305766	-0.0319908	-2.30057	0.0258881	0.231248	-3.71747	AFTPH	45	-2.33009	0.0240715	0.223822
RBM28	0.50986	-0.00523586	2.29591	0.026175	0.232876	-3.72683	RBM28	91	2.3246	0.0243891	0.226587
PPA2	0.420206	0.165573	2.28292	0.0269896	0.235658	-3.75283	PPA2	139	2.32182	0.0245511	0.227589
MYH9	-0.389817	0.0965024	-2.26767	0.0279752	0.240994	-3.78322	MYH9	2520	-2.32146	0.024572	0.227589
DCAF7	0.231542	0.0851664	2.27428	0.0275441	0.239318	-3.77006	DCAF7	52	2.32141	0.0245755	0.227589
MAFF	-0.797152	-0.0852162	-2.32092	0.0246673	0.224986	-3.67641	MAFF	5	-2.32135	0.0245787	0.227589
GPRIN1	-0.894715	0.408081	-2.30503	0.0256155	0.23056	-3.70848	GPRIN1	29	-2.32081	0.0246102	0.22769
ALKBH4	0.37522	0.0649752	2.32673	0.0243281	0.224197	-3.66463	ALKBH4	16	2.32032	0.024639	0.227767
ITGA2	1.42872	-0.214177	2.30482	0.0256286	0.23056	-3.70891	ITGA2	15	2.31951	0.0246866	0.228018
ATP2A2	0.327388	0.0259389	2.26117	0.0284049	0.243003	-3.79612	ATP2A2	193	2.31848	0.024747	0.228305
GLCE	0.630564	0.117381	2.33287	0.023975	0.222739	-3.65219	GLCE	4	2.31829	0.0247587	0.228305
SDHA	0.512216	0.225555	2.28767	0.0266892	0.234964	-3.74334	SDHA	105	2.31723	0.0248212	0.228692
MTCL1	-1.61917	0.182982	-2.29794	0.0260495	0.231944	-3.72275	MTCL1	41	-2.31465	0.0249742	0.229704
PPIH	0.242866	0.0135728	2.25262	0.0289794	0.243738	-3.81306	PPIH	77	2.31458	0.0249779	0.229704
XPO5	0.383254	-0.089724	2.26696	0.0280222	0.241212	-3.78464	XPO5	220	2.31433	0.024993	0.229704
CLEC17A	-1.4981	-0.78939	-2.50635	0.0240897	0.22306	-3.36923	CLEC17A	1	-2.4752	0.0250446	0.229989
EXOSC7	-0.311691	-0.044498	-2.2753	0.0274783	0.23912	-3.76804	EXOSC7	60	-2.31286	0.0250805	0.230128
CYBC1	-0.557047	0.247955	-2.30513	0.0256096	0.23056	-3.70828	CYBC1	16	-2.31133	0.0251721	0.230779
TXNDC12	-0.484462	-0.05285	-2.28612	0.0267871	0.235299	-3.74644	TXNDC12	57	-2.31065	0.0252126	0.230937
LRRC6	0.648548	0.095493	2.6482	0.0143291	0.171487	-2.99601	LRRC6	1	2.38807	0.0252308	0.230937
PRR3	0.488741	-0.106107	2.32453	0.024456	0.224269	-3.66909	PRR3	7	2.30968	0.0252707	0.231112
IVL	-1.47621	-1.67201	-2.31166	0.025881	0.231248	-3.70701	IVL	2	-2.31992	0.0253018	0.231206
TH	-1.26733	-0.770374	-2.37137	0.0248033	0.225356	-3.55676	TH	1	-2.3573	0.0254217	0.231612
DPH1	0.585276	0.169303	2.304	0.0256785	0.23056	-3.71057	DPH1	12	2.30692	0.0254373	0.231612
DTX3L	-0.576249	0.0904948	-2.28068	0.0271325	0.23648	-3.7573	DTX3L	98	-2.30686	0.0254406	0.231612
IQGAP3	-0.73817	0.102807	-2.28655	0.0267601	0.23526	-3.74559	IQGAP3	61	-2.30674	0.025448	0.231612
HNRNPA1	0.244488	0.114665	2.37048	0.0219073	0.21295	-3.57526	HNRNPA1	12	2.30669	0.0254507	0.231612
GPATCH8	0.245484	0.103235	2.23228	0.0303872	0.24615	-3.85313	GPATCH8	115	2.30628	0.0254759	0.231612
UBASH3B	-0.876325	0.312812	-2.28563	0.0268177	0.235299	-3.74741	UBASH3B	91	-2.30601	0.0254919	0.231612
NUDT16	-1.10557	0.10143	-2.29034	0.0265217	0.234461	-3.738	NUDT16	20	-2.30494	0.0255569	0.231936
HLTF	0.612695	-0.0692586	2.27881	0.0272524	0.237339	-3.76104	HLTF	117	2.30474	0.0255692	0.231936
SH2D4A	-1.91596	-0.396914	-2.29512	0.0266527	0.234873	-3.73573	SH2D4A	2	-2.3071	0.0258374	0.234038
MNDA	-2.05458	-2.66368	-2.28857	0.0266328	0.234873	-3.74154	MNDA	2	-2.30025	0.025843	0.234038
ARMH3	-0.195617	0.0495513	-2.30415	0.0256694	0.23056	-3.71027	ARMH3	27	-2.29946	0.0258909	0.234281
UBE2G2	0.437981	-0.202552	2.29173	0.0264345	0.234296	-3.7352	UBE2G2	21	2.29831	0.0259616	0.234723
EEF1AKMT2	0.492639	-0.06729	2.33136	0.0240616	0.222985	-3.65526	EEF1AKMT2	4	2.29759	0.0260063	0.234723
GCC1	-0.241435	-0.082675	-2.25572	0.0287698	0.24369	-3.80692	GCC1	50	-2.29742	0.0260164	0.234723
RNASEH2B	-0.340222	0.047332	-2.25972	0.0285019	0.243272	-3.799	RNASEH2B	71	-2.2973	0.0260241	0.234723
CMC4	-0.775344	0.259208	-2.28833	0.026648	0.234873	-3.74202	CMC4	10	-2.29571	0.0261224	0.235419
PPP1CA	-0.363695	0.135222	-2.27097	0.0277592	0.240249	-3.77665	PPP1CA	43	-2.29491	0.0261719	0.235675
PIKFYVE	-0.331951	0.0399386	-2.24806	0.0292899	0.243738	-3.82207	PIKFYVE	103	-2.29403	0.0262264	0.235974
AGGF1	-0.655469	-0.404368	-2.3121	0.0251897	0.227751	-3.69424	AGGF1	3	-2.2936	0.0262529	0.236022
NGRN	0.443485	-0.0866026	2.31421	0.0250637	0.226796	-3.68997	NGRN	7	2.29321	0.0262772	0.23605
MAPKAPK5	0.336446	0.0443404	2.31665	0.024919	0.226038	-3.68505	MAPKAPK5	12	2.29237	0.0263294	0.236301
MICAL2	-1.15943	-0.231158	-2.30914	0.0259095	0.231253	-3.67767	MICAL2	1	-2.30062	0.02635	0.236301
IFT57	-0.738513	-0.0448891	-2.28447	0.0268913	0.235299	-3.74973	IFT57	11	-2.29174	0.0263689	0.236301
AHCTF1	0.203998	0.088229	2.17338	0.0348105	0.262052	-3.96749	AHCTF1	223	2.2911	0.0264087	0.236449
RRM1	-0.409314	-0.0764237	-2.2478	0.0293074	0.243738	-3.82257	RRM1	224	-2.29055	0.0264431	0.236449
SLC25A32	0.596479	0.00704267	2.35856	0.0225446	0.216685	-3.59975	SLC25A32	1	2.29045	0.0264492	0.236449
IMPAD1	0.417949	-0.0948477	2.27435	0.02754	0.239318	-3.76994	IMPAD1	31	2.2893	0.0265212	0.236859
KEAP1	0.3548	0.0901173	2.26545	0.0281214	0.241505	-3.78763	KEAP1	42	2.28904	0.0265376	0.236859
ACIN1	0.153371	0.0983507	2.08744	0.0422806	0.288524	-4.1299	ACIN1	345	2.28857	0.0265673	0.236935
GPSM3	-0.707088	-0.24045	-2.28475	0.0268738	0.235299	-3.74918	GPSM3	8	-2.28822	0.0265889	0.236937
LIMK1	-0.510892	-0.170178	-2.28463	0.0268813	0.235299	-3.74942	LIMK1	15	-2.28787	0.026611	0.236944
TMEM209	0.197931	0.092968	2.26418	0.0282052	0.242039	-3.79015	TMEM209	35	2.28712	0.0266586	0.237173
MIER3	0.403145	0.0840012	2.28291	0.0269902	0.235658	-3.75285	MIER3	20	2.28653	0.0266956	0.237173
UHMK1	0.579641	0.0519198	2.32892	0.0242015	0.223724	-3.66019	UHMK1	2	2.28645	0.0267006	0.237173
CKAP2L	-0.686227	-0.168957	-2.26968	0.0278435	0.240604	-3.77922	CKAP2L	33	-2.28592	0.0267338	0.237278
PTGES3	0.255815	0.143944	2.21229	0.0318293	0.251084	-3.89222	PTGES3	141	2.28528	0.0267746	0.237452
RAB5A	-0.331469	0.0484586	-2.27128	0.0277392	0.240249	-3.77604	RAB5A	30	-2.28428	0.026838	0.237669
PDCD10	-0.298009	-0.0827344	-2.24419	0.0295553	0.243738	-3.82969	PDCD10	63	-2.28414	0.0268468	0.237669
BMP1	0.896826	-0.343272	2.39559	0.0237575	0.221644	-3.51566	BMP1	1	2.33719	0.0268632	0.237669
ZBED5	0.276316	0.0873313	2.29127	0.0264631	0.234296	-3.73612	ZBED5	21	2.28337	0.0268956	0.237766
ELMOD2	0.417544	0.236325	2.2663	0.0280656	0.241399	-3.78595	ELMOD2	32	2.28194	0.0269864	0.238346
DOP1B	-0.577102	-0.150457	-2.26059	0.0284439	0.243149	-3.79728	DOP1B	53	-2.28166	0.0270039	0.238346
RPL36AL	-0.363377	0.0541234	-2.3808	0.0213688	0.210529	-3.55399	RPL36AL	3	-2.27996	0.0271126	0.239115
TNC	-1.86045	0.28695	-2.47064	0.0279449	0.24092	-3.46805	TNC	1	-2.46919	0.0272425	0.239534
FAM114A2	-0.450929	-0.009162	-2.24749	0.0293286	0.243738	-3.82318	FAM114A2	87	-2.27784	0.0272484	0.239534
FBXW12	-3.13187	0.46985	-10.8129	0.00140338	0.0482006	-1.57824	FBXW12	1	-3.49156	0.0272576	0.239534
RGS12	-1.04335	0.405299	-2.26385	0.0282271	0.24204	-3.79081	RGS12	18	-2.2777	0.0272576	0.239534
N6AMT1	0.70873	-0.115345	2.28457	0.026885	0.235299	-3.74953	N6AMT1	4	2.27754	0.0272677	0.239534
KPNA3	-0.358305	-0.0798682	-2.24219	0.0296939	0.243998	-3.83364	KPNA3	63	-2.2746	0.027457	0.240977
ARHGAP9	-0.718288	-0.240008	-2.25745	0.0286538	0.24369	-3.8035	ARHGAP9	36	-2.27424	0.0274804	0.240977
FICD	0.557859	-0.158414	2.3529	0.0228528	0.218515	-3.61133	FICD	1	2.27399	0.0274969	0.240977
TRAF5	-0.882382	-0.37782	-2.25976	0.028499	0.243272	-3.79892	TRAF5	19	-2.273	0.0275612	0.241194
ZNF655	0.320048	0.0369307	2.28961	0.0265674	0.234678	-3.73945	ZNF655	15	2.27294	0.0275651	0.241194
GEMIN6	0.334823	-0.0286131	2.29962	0.0259464	0.231397	-3.71938	GEMIN6	11	2.27232	0.0276052	0.24129
TRBV18	-2.14783	-2.82024	-2.26174	0.0283675	0.242869	-3.795	TRBV18	1	-2.27177	0.0276408	0.24129
SUPT20H	-0.224265	0.0647	-2.28742	0.0267052	0.234964	-3.74385	SUPT20H	22	-2.27125	0.0276749	0.24129
PXN	1.11738	0.0688901	2.25635	0.0287274	0.24369	-3.80567	PXN	22	2.27114	0.0276817	0.24129
DUSP11	0.382611	0.00402631	2.26596	0.0280881	0.241406	-3.78663	DUSP11	22	2.2711	0.0276844	0.24129
ACAT1	0.613281	0.305141	2.24407	0.0295639	0.243738	-3.82993	ACAT1	153	2.27046	0.0277263	0.241351
CD72	-1.49768	0.535262	-2.25615	0.0287407	0.24369	-3.80606	CD72	12	-2.27027	0.0277383	0.241351
TKTL2	0.422592	0.237564	2.42681	0.0191096	0.198946	-3.45829	TKTL2	1	2.27	0.0277564	0.241351
EXOC3	-0.217088	-0.0193846	-2.20218	0.0325812	0.25334	-3.91188	EXOC3	73	-2.26913	0.0278133	0.241631
THEMIS2	-1.05193	-0.246541	-2.25663	0.0287089	0.24369	-3.80512	THEMIS2	10	-2.26804	0.0278842	0.241631
MVP	-1.20132	-1.19379	-2.25072	0.029108	0.243738	-3.8168	MVP	57	-2.26803	0.0278851	0.241631
RSAD1	0.455364	-0.0368226	2.29137	0.0264573	0.234296	-3.73593	RSAD1	6	2.26794	0.0278912	0.241631
RAB31	-2.21122	-1.11233	-2.27781	0.0287554	0.24369	-3.70703	RAB31	1	-2.28931	0.0278972	0.241631
TAX1BP3	-0.54027	0.0390237	-2.30136	0.0258393	0.231248	-3.71587	TAX1BP3	3	-2.26751	0.027919	0.241632
MAP3K1	-0.900923	0.0833913	-2.25116	0.0290784	0.243738	-3.81594	MAP3K1	31	-2.26693	0.027957	0.241773
ZMYM1	0.602797	-0.0919792	2.25103	0.0290876	0.243738	-3.81621	ZMYM1	31	2.26648	0.0279869	0.241844
MGME1	-0.319685	0.0381124	-2.24093	0.0297809	0.243998	-3.83611	MGME1	42	-2.26579	0.0280324	0.242048
PTPN6	-1.07349	-0.179991	-2.24567	0.0294535	0.243738	-3.82677	PTPN6	175	-2.26522	0.0280698	0.242106
CDK14	0.989313	0.451506	2.25062	0.0291152	0.243738	-3.81701	CDK14	22	2.26503	0.0280825	0.242106
SPINK2	-3.40488	-1.39783	-2.27931	0.02922	0.243738	-3.53439	SPINK2	1	-2.29399	0.0281327	0.242351
SRC	-1.2822	-0.396369	-2.24945	0.0291947	0.243738	-3.81931	SRC	17	-2.26384	0.0281611	0.242407
CA5B	-1.18231	-0.273763	-2.25522	0.028804	0.243738	-3.80792	CA5B	4	-2.26314	0.0282071	0.242616
SCARB1	0.781841	0.0407018	2.25371	0.0289058	0.243738	-3.8109	SCARB1	11	2.26204	0.0282802	0.243057
OAF	0.630865	0.1896	2.32484	0.0258141	0.231248	-3.69368	OAF	2	2.28112	0.0284261	0.244016
NCOA1	0.41586	-0.033668	2.24926	0.0292078	0.243738	-3.81969	NCOA1	25	2.25913	0.0284741	0.244016
PPP1R18	-0.834588	0.26755	-2.2385	0.0299505	0.244212	-3.84091	PPP1R18	102	-2.25901	0.0284817	0.244016
AUTS2	0.591811	0.2636	2.25599	0.0287515	0.24369	-3.80638	AUTS2	11	2.2586	0.0285093	0.244016
CDADC1	0.583643	-0.188561	2.32664	0.0243333	0.224197	-3.66481	CDADC1	1	2.25816	0.0285387	0.244016
ILF3	0.18545	0.0192677	2.1069	0.0404761	0.282444	-4.09359	ILF3	600	2.25807	0.0285445	0.244016
MEGF8	0.533484	0.075764	2.29265	0.0263773	0.234247	-3.73336	MEGF8	3	2.25806	0.0285452	0.244016
MTIF3	0.483886	0.310558	2.25308	0.028948	0.243738	-3.81214	MTIF3	17	2.25767	0.0285713	0.244051
C4BPA	-1.65316	0.115777	-2.28355	0.0289415	0.243738	-3.68846	C4BPA	1	-2.28679	0.0285959	0.244074
CENPW	0.732314	0.278427	2.6513	0.0167215	0.186732	-3.07738	CENPW	1	2.38032	0.0286917	0.244637
KCTD17	-0.727872	-0.156433	-2.29241	0.0263922	0.234247	-3.73384	KCTD17	1	-2.25535	0.0287275	0.244637
RASA3	-0.729481	-0.195085	-2.2365	0.0300897	0.24463	-3.84482	RASA3	52	-2.25534	0.0287278	0.244637
FMNL1	-0.643091	-0.267095	-2.22816	0.030679	0.247433	-3.86119	FMNL1	182	-2.25387	0.0288273	0.245296
RMDN3	0.646816	0.00731974	2.23717	0.0300428	0.244427	-3.84351	RMDN3	33	2.25319	0.0288731	0.245407
PRPF40B	-0.838134	0.108399	-2.24489	0.0295071	0.243738	-3.82831	PRPF40B	9	-2.25302	0.0288844	0.245407
GORAB	0.489919	0.00367828	2.25033	0.0291349	0.243738	-3.81758	GORAB	14	2.25143	0.0289923	0.245681
SPATA20	-1.36805	0.126194	-2.23894	0.0299196	0.244139	-3.84004	SPATA20	7	-2.25124	0.0290053	0.245681
SLC35E2B	0.495409	-0.0967292	2.35398	0.022794	0.218515	-3.60913	SLC35E2B	1	2.25118	0.0290091	0.245681
PELI2	-0.645153	-0.0330881	-2.24449	0.029535	0.243738	-3.82911	PELI2	13	-2.25105	0.0290184	0.245681
GCH1	-1.14382	-0.825848	-2.25582	0.0287632	0.24369	-3.80672	GCH1	1	-2.25084	0.029032	0.245681
CRAMP1	-0.553087	0.138345	-2.24103	0.0297742	0.243998	-3.83592	CRAMP1	19	-2.24991	0.0290956	0.245681
SEH1L	0.178287	0.0759548	2.20411	0.0324364	0.252844	-3.90813	SEH1L	43	2.24977	0.0291052	0.245681
ALDOC	0.844008	0.324906	2.22833	0.0306675	0.247433	-3.86087	ALDOC	163	2.24968	0.029111	0.245681
SEPTIN2	-0.310299	0.0702267	-2.18735	0.0337125	0.258061	-3.94058	SEPTIN2	290	-2.24902	0.0291564	0.245681
SLC12A4	-0.549857	-0.109671	-2.24842	0.0292654	0.243738	-3.82136	SLC12A4	11	-2.24901	0.0291568	0.245681
SELENOW	-1.55908	-0.0628136	-2.24421	0.0300042	0.244292	-3.83622	SELENOW	3	-2.25535	0.0291595	0.245681
FADD	-0.301776	-0.0257863	-2.23486	0.0302048	0.245117	-3.84804	FADD	31	-2.24852	0.0291903	0.245755
LMNB2	0.208249	0.161293	2.12775	0.0386184	0.275175	-4.0544	LMNB2	444	2.24811	0.0292183	0.245805
NDUFAF2	0.594394	0.00986808	2.2344	0.0302377	0.245117	-3.84897	NDUFAF2	26	2.24778	0.0292407	0.245807
ARL6	0.810629	-0.374911	2.24164	0.0297316	0.243998	-3.83471	ARL6	7	2.24723	0.0292784	0.245836
DOCK2	-0.706381	-0.0801526	-2.2213	0.0311719	0.2496	-3.87463	DOCK2	438	-2.24685	0.0293047	0.245836
CFAP299	-0.889579	-0.354331	-4.1828	0.00396277	0.0858963	-1.54646	CFAP299	1	-2.66261	0.0293361	0.245836
NRBP1	0.371941	0.246789	2.21646	0.0315232	0.250361	-3.88408	NRBP1	61	2.24636	0.0293379	0.245836
SNX25	-0.628813	0.0531573	-2.23993	0.0298504	0.244053	-3.83808	SNX25	13	-2.24602	0.0293612	0.245836
C1orf43	0.510848	-0.0620202	2.27319	0.0276147	0.239557	-3.77223	C1orf43	4	2.2458	0.0293767	0.245836
SEMA4C	1.1181	-0.0294729	2.23817	0.0299731	0.244217	-3.84154	SEMA4C	4	2.24523	0.029416	0.245978
ATP11C	0.38378	0.159439	2.22255	0.0310812	0.249052	-3.87217	ATP11C	43	2.24491	0.0294378	0.245978
PLEKHG1	-1.56998	-0.292799	-2.2394	0.0298872	0.244053	-3.83912	PLEKHG1	1	-2.24435	0.0294761	0.246003
POLE	0.388182	-0.0965375	2.20383	0.0324571	0.252844	-3.90866	POLE	146	2.24392	0.0295059	0.246003
FLOT2	-0.513035	0.296719	-2.21657	0.0315155	0.250361	-3.88387	FLOT2	97	-2.2438	0.0295143	0.246003
ABCB7	-0.323792	0.148987	-2.22088	0.0312023	0.249663	-3.87545	ABCB7	40	-2.24358	0.0295292	0.246003
UTP25	0.457952	0.011362	2.22044	0.0312339	0.249692	-3.87631	UTP25	50	2.24297	0.0295716	0.246135
CPNE8	1.80663	-0.277562	2.23074	0.0304957	0.246669	-3.85613	CPNE8	3	2.24241	0.0296099	0.246135
ADPRH	-1.76544	-0.679468	-2.24338	0.0301881	0.245117	-3.80688	ADPRH	1	-2.25049	0.0296115	0.246135
KCTD10	-0.264737	-0.0158075	-2.24302	0.0296365	0.243998	-3.83201	KCTD10	24	-2.24176	0.0296554	0.246135
ACADS	-0.844565	0.0414661	-2.22693	0.0307672	0.247855	-3.86361	ACADS	27	-2.24175	0.0296556	0.246135
KMT2A	0.305917	0.0346319	2.19187	0.0333639	0.257161	-3.93184	KMT2A	106	2.24083	0.0297196	0.246482
RNF146	0.632147	0.155203	2.24089	0.0297839	0.243998	-3.8362	RNF146	7	2.23988	0.0297856	0.246779
F2R	-2.20417	-0.820909	-2.23679	0.0306494	0.247433	-3.81966	F2R	1	-2.24775	0.0297997	0.246779
CDKN2D	-0.623711	-0.321034	-2.23968	0.0298676	0.244053	-3.83857	CDKN2D	7	-2.23824	0.0299	0.247425
ZNF384	0.261097	0.029333	2.24622	0.0294156	0.243738	-3.82568	ZNF384	21	2.23669	0.030008	0.248135
PCBP3	-1.41354	-0.514205	-2.22495	0.0309087	0.248745	-3.86748	PCBP3	5	-2.23625	0.0300385	0.248203
ZNF740	0.396541	0.223301	2.25136	0.0290647	0.243738	-3.81554	ZNF740	10	2.23543	0.030096	0.248411
SORBS2	1.61293	0.251571	2.22436	0.0309515	0.248909	-3.86865	SORBS2	3	2.23496	0.0301295	0.248411
ITIH4	-1.19899	0.300094	-2.24834	0.0298448	0.244053	-3.79724	ITIH4	1	-2.24297	0.0301307	0.248411
ANGEL1	0.485055	0.00263624	2.24156	0.0297374	0.243998	-3.83488	ANGEL1	9	2.2344	0.0301687	0.24854
SLC1A3	-1.01904	-0.306165	-2.26378	0.0285555	0.243356	-3.54568	SLC1A3	2	-2.23828	0.0302186	0.248767
POLH	-0.512236	0.102894	-2.23459	0.0302239	0.245117	-3.84858	POLH	11	-2.23309	0.0302606	0.248929
LIMS1	-0.402669	-0.132875	-2.25038	0.0291318	0.243738	-3.81749	LIMS1	9	-2.23269	0.0302892	0.24898
CEP63	-0.293043	0.0957353	-2.22268	0.0310721	0.249052	-3.87193	CEP63	28	-2.23162	0.0303643	0.249222
AUH	0.477333	0.13714	2.24185	0.0297169	0.243998	-3.83429	AUH	8	2.23154	0.0303704	0.249222
RPRD1A	0.409536	0.211205	2.20638	0.0322668	0.252197	-3.90371	RPRD1A	53	2.23131	0.0303866	0.249222
CLINT1	-0.235707	0.00459903	-2.16071	0.0358331	0.264779	-3.99177	CLINT1	107	-2.231	0.0304083	0.249222
UPF3A	-0.460337	0.102551	-2.21745	0.031451	0.250361	-3.88215	UPF3A	28	-2.23046	0.0304463	0.249351
IL16	-1.24703	-0.0851343	-2.21335	0.0317507	0.250896	-3.89014	IL16	43	-2.22973	0.0304988	0.249597
GIT2	-0.390516	0.123847	-2.1937	0.0332243	0.25644	-3.92832	GIT2	101	-2.22907	0.0305452	0.249793
ERGIC2	0.29941	-0.141223	2.24788	0.0293022	0.243738	-3.82242	ERGIC2	15	2.22831	0.0305997	0.250055
CD4	1.45059	-1.20773	2.21877	0.031355	0.250166	-3.87957	CD4	2	2.22615	0.0307537	0.250931
PROSER3	0.392769	-0.0555444	2.28283	0.0269958	0.235658	-3.75302	PROSER3	4	2.22587	0.0307732	0.250931
BDP1	0.321306	0.0713772	2.19831	0.0328729	0.254788	-3.91937	BDP1	47	2.22557	0.0307952	0.250931
NCEH1	-0.585254	-0.152911	-2.21367	0.0317273	0.250896	-3.88951	NCEH1	23	-2.22554	0.0307971	0.250931
TMEM159	-0.635087	0.117815	-2.2526	0.0295526	0.243738	-3.82164	TMEM159	3	-2.2319	0.0309094	0.251499
GNA12	-0.830614	0.220389	-2.21226	0.031831	0.251084	-3.89226	GNA12	16	-2.22394	0.030912	0.251499
S100A1	2.00899	-0.098164	2.20955	0.0320315	0.251419	-3.89755	S100A1	6	2.22341	0.0309503	0.251626
SPA17	-1.09691	-0.200713	-2.21597	0.0315594	0.250361	-3.88504	SPA17	4	-2.22279	0.0309947	0.251804
NXT2	-0.384919	-0.0304439	-2.26879	0.0279018	0.240893	-3.78099	NXT2	5	-2.22243	0.0310202	0.251827
RCN3	1.36191	-0.345038	2.35817	0.0297928	0.243998	-3.58444	RCN3	1	2.33022	0.031095	0.25209
MYH14	-0.442153	0.0889589	-2.2174	0.0314545	0.250361	-3.88224	MYH14	18	-2.22136	0.0310979	0.25209
CAPN1	-0.357647	0.187269	-2.17287	0.0348508	0.262052	-3.96846	CAPN1	235	-2.22051	0.0311594	0.252188
TFIP11	0.160635	0.0610523	2.09555	0.041521	0.286325	-4.11482	TFIP11	103	2.22006	0.0311918	0.252188
SCLT1	-0.233975	-0.200576	-2.20786	0.0321565	0.251753	-3.90083	SCLT1	31	-2.21997	0.0311985	0.252188
PPP3CC	-0.681437	0.0538101	-2.20782	0.0321593	0.251753	-3.90091	PPP3CC	21	-2.21994	0.0312006	0.252188
ASB8	-0.363029	-0.150775	-2.27346	0.0275976	0.239557	-3.77171	ASB8	5	-2.2193	0.0312467	0.252193
SKIDA1	-3.42019	0.275481	-5.52445	0.0104707	0.143425	-2.32077	SKIDA1	1	-3.33635	0.0312651	0.252193
PSMA1	-0.27985	-0.000388071	-2.16315	0.0356341	0.264779	-3.9871	PSMA1	116	-2.21899	0.0312693	0.252193
LAMP1	-0.69841	0.191846	-2.20169	0.0326178	0.25334	-3.91282	LAMP1	38	-2.21846	0.0313078	0.252301
RTN2	-1.17201	-0.181545	-2.23018	0.0309915	0.249051	-3.8307	RTN2	1	-2.22433	0.031328	0.252301
CHIC2	-0.347723	0.0868659	-2.35983	0.0224757	0.216396	-3.59713	CHIC2	2	-2.21691	0.0314205	0.252727
PLA2G15	-0.704852	0.170054	-2.21404	0.0317	0.250896	-3.88879	PLA2G15	7	-2.21662	0.0314419	0.252727
SLX4	-0.31105	-0.0845362	-2.22015	0.031255	0.249692	-3.87688	SLX4	20	-2.21652	0.031449	0.252727
TP53I3	-1.01524	0.0721307	-2.21021	0.0319826	0.251419	-3.89626	TP53I3	4	-2.21558	0.0315174	0.253078
IGSF3	1.07783	-0.0298474	2.20279	0.0325355	0.253231	-3.9107	IGSF3	12	2.21498	0.0315617	0.253078
TRMT44	0.367609	-0.198896	2.24823	0.0292782	0.243738	-3.82173	TRMT44	7	2.21466	0.0315847	0.253078
PARP14	-0.615947	-0.101424	-2.18939	0.0335555	0.258061	-3.93665	PARP14	150	-2.21448	0.0315978	0.253078
TAF11	0.275303	0.02559	2.27038	0.0277978	0.240396	-3.77783	TAF11	9	2.21437	0.0316064	0.253078
HPS1	-0.557712	0.184414	-2.21107	0.0319192	0.251419	-3.8946	HPS1	12	-2.21368	0.0316565	0.253245
PCNA	-0.332329	-0.241762	-2.15637	0.0361896	0.265868	-4.00006	PCNA	493	-2.21346	0.0316727	0.253245
AASDH	0.51816	0.0196619	2.20993	0.0320028	0.251419	-3.8968	AASDH	14	2.21302	0.0317053	0.253324
HSD17B11	0.687136	0.181674	2.19705	0.0329688	0.25531	-3.92183	HSD17B11	32	2.21253	0.0317413	0.253429
FBXL4	0.433358	0.218581	2.22681	0.0307759	0.247855	-3.86385	FBXL4	8	2.21152	0.0318154	0.253839
KMO	-2.17804	0.126703	-2.20073	0.0326902	0.253725	-3.91469	KMO	1	-2.21096	0.0318567	0.253938
DHX40	0.343949	0.0766488	2.18281	0.0340662	0.259396	-3.94935	DHX40	52	2.2106	0.0318832	0.253938
UBXN1	-0.218432	-0.0147799	-2.15079	0.0366525	0.267854	-4.01071	UBXN1	69	-2.21042	0.0318963	0.253938
MLF2	0.32787	-0.116604	2.20936	0.0320456	0.251419	-3.89792	MLF2	21	2.20958	0.0319584	0.254251
KIF3A	0.377824	-0.280807	2.18906	0.0335802	0.258061	-3.93727	KIF3A	39	2.20892	0.0320079	0.254463
GRK6	-0.42565	0.04997	-2.19019	0.0334938	0.257984	-3.93511	GRK6	36	-2.20765	0.0321017	0.255026
FAM126B	-0.377125	-0.0620016	-2.24503	0.0294979	0.243738	-3.82805	FAM126B	6	-2.20706	0.0321458	0.255189
NUF2	-0.514767	-0.238907	-2.18514	0.0338845	0.258666	-3.94485	NUF2	54	-2.20654	0.0321842	0.255189
CNNM1	1.95642	-0.038603	2.37368	0.0312732	0.249692	-3.46362	CNNM1	1	2.34833	0.0322198	0.255189
KLF12	0.39136	0.116544	2.2168	0.0314984	0.250361	-3.88342	KLF12	12	2.20596	0.0322277	0.255189
GNPTAB	-0.533226	-0.091567	-2.19214	0.0333432	0.257161	-3.93132	GNPTAB	28	-2.20576	0.0322428	0.255189
TRIO	-0.998818	0.215953	-2.18737	0.0337113	0.258061	-3.94055	TRIO	82	-2.2055	0.0322618	0.255189
KHNYN	-0.363615	0.188726	-2.18482	0.0339095	0.258679	-3.94547	KHNYN	39	-2.20495	0.0323028	0.255189
COMMD1	-0.322634	-0.115679	-2.20513	0.0323602	0.252573	-3.90615	COMMD1	21	-2.20491	0.0323056	0.255189
ZFP92	-3.10994	-1.36793	-2.48821	0.0371891	0.26982	-3.54708	ZFP92	1	-2.53758	0.0323783	0.255209
EPHA7	2.30524	0.188006	2.23395	0.0336136	0.258061	-3.77562	EPHA7	1	2.2483	0.0323832	0.255209
UTP4	0.359158	0.00487661	2.17264	0.0348696	0.262052	-3.96891	UTP4	66	2.20387	0.0323834	0.255209
FKBP5	0.55512	-0.0601968	2.17522	0.0346638	0.26192	-3.96395	FKBP5	216	2.20365	0.0323999	0.255209
EZR	-0.729434	-0.0563557	-2.17933	0.0343391	0.260083	-3.95605	EZR	333	-2.20311	0.0324409	0.255351
ZNF484	-0.553872	-0.0132796	-2.29787	0.026482	0.234296	-3.69797	ZNF484	1	-2.20833	0.0325021	0.255492
RRS1	0.37252	-0.0636071	2.1719	0.0349284	0.262139	-3.97033	RRS1	67	2.20226	0.0325047	0.255492
SOX7	1.48021	0.402777	2.29328	0.0321873	0.251753	-3.67252	SOX7	1	2.28197	0.0326194	0.256149
BLNK	-1.04488	0.203999	-2.18784	0.0336749	0.258061	-3.93964	BLNK	13	-2.20008	0.0326684	0.256149
AP1S2	-0.557219	-0.0156116	-2.19489	0.0331329	0.25609	-3.926	AP1S2	14	-2.19979	0.0326902	0.256149
CREB1	-0.324513	0.0767341	-2.21604	0.0315543	0.250361	-3.88491	CREB1	14	-2.19971	0.0326963	0.256149
WARS1	-0.808553	-0.418056	-2.17769	0.0344682	0.260796	-3.9592	WARS1	189	-2.19906	0.032745	0.256149
TSSC4	-0.275194	0.113379	-2.25357	0.0289152	0.243738	-3.81118	TSSC4	9	-2.19892	0.0327559	0.256149
TMTC4	-0.691603	-0.00886575	-2.21051	0.03196	0.251419	-3.89567	TMTC4	3	-2.1987	0.0327727	0.256149
LARP4B	-0.323234	-0.115599	-2.16523	0.0354656	0.263859	-3.98313	LARP4B	62	-2.1985	0.0327877	0.256149
TNS1	1.35906	0.320439	2.19658	0.0330045	0.25531	-3.92273	TNS1	1	2.1984	0.0327953	0.256149
CISD1	0.699058	0.193053	2.18212	0.0341204	0.259399	-3.95068	CISD1	31	2.19727	0.0328813	0.256378
ZNF598	0.284736	-0.0505994	2.15022	0.0366995	0.268022	-4.01178	ZNF598	86	2.19714	0.0328905	0.256378
GDA	-0.710092	-0.383093	-2.82224	0.0252177	0.227819	-3.15978	GDA	9	-2.588	0.0328938	0.256378
ASPH	1.28303	0.00331301	2.17919	0.0343505	0.260083	-3.95633	ASPH	45	2.19534	0.033028	0.257244
JAGN1	0.335443	0.151205	2.24641	0.0294031	0.243738	-3.82533	JAGN1	6	2.19472	0.0330752	0.257405
PRMT7	-0.368816	-0.243592	-2.18951	0.0335456	0.258061	-3.93641	PRMT7	22	-2.19443	0.0330969	0.257405
FCSK	-0.383781	0.0436873	-2.18842	0.0336302	0.258061	-3.93853	FCSK	22	-2.19415	0.0331181	0.257405
TRBV20-1	-2.79056	-2.77925	-2.18098	0.0342094	0.25965	-3.95287	TRBV20-1	1	-2.19328	0.0331847	0.257743
REXO1	0.309978	-0.000519528	2.20561	0.0323242	0.252469	-3.90521	REXO1	16	2.19276	0.0332243	0.25786
ANKRD52	0.385727	-0.276339	2.18156	0.0341637	0.259551	-3.95175	ANKRD52	27	2.19245	0.0332486	0.25786
HRAS	-0.438433	-0.228781	-2.31908	0.0247757	0.225288	-3.68014	HRAS	1	-2.19218	0.0332692	0.25786
PWP2	1.76967	-0.194106	2.18359	0.0340055	0.259234	-3.94785	PWP2	1	2.1911	0.0333521	0.258322
WIPF1	-0.434043	0.0339968	-2.18517	0.0338818	0.258666	-3.94479	WIPF1	18	-2.18898	0.0335151	0.259404
LGALS3BP	0.675065	-0.435064	2.16679	0.0353392	0.263765	-3.98013	LGALS3BP	85	2.18782	0.0336045	0.259761
PLD3	0.629662	-0.115919	2.18633	0.033792	0.258314	-3.94256	PLD3	8	2.18778	0.033608	0.259761
FAHD2A	-0.628795	0.0942529	-2.20375	0.0324631	0.252844	-3.90882	FAHD2A	3	-2.18654	0.0337041	0.260324
EFNA1	1.44161	0.193492	2.21067	0.0340735	0.259396	-3.88944	EFNA1	1	2.21329	0.0337321	0.260359
HCK	-2.35772	-1.08804	-2.17289	0.0348499	0.262052	-3.96844	HCK	2	-2.18536	0.0337958	0.26067
TMEM154	-1.65855	-0.392935	-2.17409	0.0347541	0.262052	-3.96613	TMEM154	3	-2.18494	0.033828	0.260738
MILR1	-1.28802	0.303599	-2.1704	0.0350483	0.262685	-3.9732	MILR1	10	-2.18309	0.0339719	0.261044
NAP1L1	0.331476	-0.0857083	2.13194	0.0382542	0.274336	-4.04648	NAP1L1	241	2.1828	0.0339952	0.261044
NHP2	0.314827	0.198961	2.1592	0.0359564	0.264779	-3.99465	NHP2	42	2.18278	0.0339962	0.261044
STT3A	0.34329	0.122328	2.14469	0.0371638	0.26982	-4.0223	STT3A	93	2.18266	0.0340056	0.261044
SMPD2	-0.547757	0.0327745	-2.18236	0.0341013	0.259399	-3.95021	SMPD2	10	-2.18248	0.0340199	0.261044
WASF2	-0.411347	0.145671	-2.15188	0.0365615	0.267751	-4.00863	WASF2	88	-2.18248	0.0340201	0.261044
VPS25	-0.37364	0.0135947	-2.15926	0.0359518	0.264779	-3.99454	VPS25	46	-2.18233	0.0340319	0.261044
SIGMAR1	0.516457	0.120212	2.1808	0.0342234	0.25965	-3.95321	SIGMAR1	12	2.18166	0.0340842	0.261216
TAF1D	0.480047	-0.0534377	2.21079	0.0319398	0.251419	-3.89514	TAF1D	4	2.18122	0.0341186	0.261216
SRSF8	0.445346	0.122994	2.23186	0.0304165	0.246208	-3.85394	SRSF8	3	2.18114	0.0341248	0.261216
EFR3A	-0.507661	0.133242	-2.16299	0.0356474	0.264779	-3.98742	EFR3A	39	-2.18067	0.0341621	0.261322
ZC3H7A	-0.177503	0.0278585	-2.10115	0.0410029	0.284161	-4.10436	ZC3H7A	69	-2.17956	0.0342489	0.261806
DMTF1	0.332907	-0.126786	2.25903	0.0285476	0.243356	-3.80036	DMTF1	4	2.17803	0.0343692	0.262546
C1GALT1	-0.593686	-0.43086	-2.173	0.034841	0.262052	-3.96823	C1GALT1	12	-2.17746	0.0344144	0.262711
HEXA	-0.657208	0.170568	-2.15915	0.0359612	0.264779	-3.99476	HEXA	46	-2.177	0.0344508	0.262809
PLD4	-1.15779	0.229629	-2.17305	0.034837	0.262052	-3.96813	PLD4	2	-2.17614	0.0345192	0.263052
MRTO4	0.279156	0.0341473	2.12863	0.0385413	0.274846	-4.05273	MRTO4	87	2.176	0.0345301	0.263052
CTNNAL1	0.743672	0.0261674	2.16687	0.0353328	0.263765	-3.97998	CTNNAL1	12	2.17532	0.0345836	0.26328
CKM	2.22703	-1.17749	2.16254	0.0356837	0.264779	-3.98827	CKM	2	2.17462	0.0346392	0.263369
ZFAND5	0.626027	0.0367249	2.17284	0.0348538	0.262052	-3.96853	ZFAND5	8	2.17429	0.0346656	0.263369
VAMP3	0.306105	0.0531323	2.2132	0.0317621	0.250896	-3.89044	VAMP3	9	2.17428	0.0346663	0.263369
RSRC1	0.251797	0.0213021	2.16892	0.0351674	0.26321	-3.97605	RSRC1	27	2.17368	0.0347139	0.263551
BCL2L1	-0.505086	-0.0742603	-2.17127	0.0349794	0.262345	-3.97155	BCL2L1	13	-2.17285	0.0347802	0.263874
PLEKHM1	-0.265058	-0.143589	-2.24833	0.029271	0.243738	-3.82152	PLEKHM1	7	-2.17175	0.034868	0.264257
SLC12A6	-0.748071	-0.581911	-2.15875	0.0359938	0.264779	-3.99552	SLC12A6	22	-2.17162	0.0348781	0.264257
SDCBP	0.503959	-0.0846559	2.15244	0.036515	0.267728	-4.00756	SDCBP	43	2.1712	0.034912	0.264334
MKI67	-0.625905	-0.202653	-2.14265	0.0373364	0.270016	-4.02618	MKI67	842	-2.16978	0.0350258	0.265015
SAMHD1	-1.3566	-0.051052	-2.1526	0.0365017	0.267728	-4.00726	SAMHD1	83	-2.16926	0.0350675	0.26515
EXO5	0.61554	0.0468013	2.18669	0.0337643	0.25828	-3.94187	EXO5	3	2.16873	0.0351101	0.265193
KDM5D	-2.05279	-0.442546	-2.17042	0.0353983	0.263765	-3.71663	KDM5D	1	-2.17285	0.0351207	0.265193
DPH2	0.473917	0.0260646	2.16099	0.0358105	0.264779	-3.99124	DPH2	19	2.16774	0.0351894	0.265257
RAD51C	0.52918	-0.28445	2.16142	0.0357754	0.264779	-3.99042	RAD51C	16	2.16747	0.0352114	0.265257
SLC7A6OS	-0.234952	-0.0375469	-2.24574	0.0294489	0.243738	-3.82664	SLC7A6OS	9	-2.16733	0.0352225	0.265257
HSPG2	1.30678	0.518368	2.15922	0.035955	0.264779	-3.99462	HSPG2	3	2.16731	0.0352246	0.265257
YKT6	-0.396008	-0.102689	-2.13631	0.0378768	0.272684	-4.0382	YKT6	80	-2.16647	0.0352919	0.265504
PLEKHA3	0.344071	0.0271025	2.30165	0.025822	0.231248	-3.7153	PLEKHA3	2	2.16625	0.0353099	0.265504
CNIH1	1.20154	0.206186	2.26752	0.0315344	0.250361	-3.56394	CNIH1	1	2.21238	0.0353289	0.265504
CEP295	-0.318146	-0.107036	-2.14944	0.036765	0.268177	-4.01327	CEP295	33	-2.16505	0.0354071	0.265742
POTEJ	-0.309257	-0.124159	-2.12977	0.0384419	0.27462	-4.05057	POTEJ	66	-2.16503	0.0354084	0.265742
DNAJC13	-0.24397	0.0434499	-2.08763	0.0422633	0.288524	-4.12956	DNAJC13	225	-2.16444	0.0354563	0.265922
CARD9	1.15988	0.0720787	2.15909	0.0359661	0.264779	-3.99487	CARD9	2	2.16235	0.0356258	0.267013
TET2	1.08737	-0.289623	2.14803	0.0368826	0.268711	-4.01595	TET2	15	2.16093	0.0357421	0.267705
MRC1	-2.49921	-0.0710054	-2.16813	0.0370071	0.269079	-3.87583	MRC1	1	-2.18127	0.0358133	0.267933
ACTR3	-0.363672	0.0801096	-2.11538	0.0397115	0.279014	-4.07769	ACTR3	267	-2.15996	0.0358208	0.267933
AKAP11	-0.49023	-0.0570857	-2.1358	0.0379213	0.272827	-4.03917	AKAP11	69	-2.15942	0.0358656	0.268013
SNX13	-0.355203	-0.018081	-2.15761	0.036087	0.26529	-3.99769	SNX13	20	-2.15925	0.0358795	0.268013
SMARCA4	0.239289	0.0509093	2.08269	0.0427317	0.29018	-4.13872	SMARCA4	187	2.15818	0.0359674	0.268401
LRRC38	2.45964	-1.06542	2.18539	0.0367689	0.268177	-3.69503	LRRC38	1	2.19309	0.0359797	0.268401
MYBBP1A	0.495827	0.0579546	2.1267	0.03871	0.275651	-4.05637	MYBBP1A	248	2.15757	0.0360176	0.268503
ANO10	0.775378	0.184253	2.14765	0.0369146	0.268711	-4.01667	ANO10	13	2.15722	0.0360461	0.268537
COL2A1	1.32638	0.427775	2.17831	0.035989	0.264779	-3.89513	COL2A1	1	2.17532	0.0361056	0.268596
MPO	1.6067	-0.4267	2.14648	0.0370135	0.269079	-4.01891	MPO	2	2.15554	0.0361846	0.268596
PROM1	1.18849	0.351388	2.15152	0.0365916	0.267751	-4.00932	PROM1	2	2.15542	0.0361941	0.268596
TM2D3	1.01941	0.262978	2.17245	0.0353631	0.263765	-3.94144	TM2D3	1	2.16113	0.0361944	0.268596
FNIP1	-0.306833	0.0528534	-2.17707	0.0345178	0.260994	-3.9604	FNIP1	13	-2.15527	0.0362066	0.268596
SRSF3	0.137804	0.0800749	1.98096	0.0534485	0.325932	-4.32363	SRSF3	157	2.1545	0.0362706	0.268596
RNF166	-0.448082	-0.142511	-2.22279	0.031064	0.249052	-3.87171	RNF166	2	-2.15435	0.0362829	0.268596
PTDSS2	0.399375	0.00572915	2.16681	0.0353378	0.263765	-3.9801	PTDSS2	10	2.1541	0.0363037	0.268596
VPS36	-0.397414	0.018438	-2.12582	0.0387871	0.275683	-4.05804	VPS36	71	-2.15401	0.0363112	0.268596
PITPNM2	0.714061	0.00531496	2.14025	0.0375406	0.270964	-4.03074	PITPNM2	26	2.15395	0.0363157	0.268596
VPS54	0.298729	0.0782041	2.16235	0.0356994	0.264779	-3.98864	VPS54	18	2.1539	0.0363196	0.268596
COL6A3	-1.16461	-0.549568	-2.15532	0.0362761	0.266328	-4.00206	COL6A3	1	-2.15294	0.0363997	0.26901
ZNF2	-0.760458	-0.134371	-2.27976	0.0317514	0.250896	-3.67789	ZNF2	2	-2.21168	0.0364335	0.269081
PUM1	0.243396	0.0315329	2.09985	0.0411225	0.284635	-4.10679	PUM1	76	2.15123	0.0365413	0.269698
COQ3	0.61797	0.0330479	2.14354	0.0372609	0.26982	-4.02449	COQ3	14	2.15067	0.0365886	0.269868
FES	-0.945631	0.450777	-2.13837	0.0377008	0.271722	-4.0343	FES	14	-2.15014	0.0366328	0.269966
ERCC6L2	0.403218	-0.118103	2.19652	0.033009	0.25531	-3.92285	ERCC6L2	4	2.14993	0.0366504	0.269966
AIG1	1.18593	-0.626381	2.90986	0.0222201	0.214678	-3.04744	AIG1	1	2.51669	0.0367062	0.270199
SIN3B	0.288795	0.175808	2.10937	0.0402527	0.281481	-4.08898	SIN3B	65	2.1464	0.0369457	0.271782
SLC34A2	-2.19879	0.216659	-4.22153	0.0126006	0.160573	-2.52703	SLC34A2	1	-2.86307	0.0369842	0.271885
SCAF11	-0.263789	0.125443	-2.08895	0.0421387	0.288441	-4.1271	SCAF11	120	-2.1456	0.0370134	0.27192
TSR3	-0.544136	-0.308722	-2.14772	0.0369086	0.268711	-4.01654	TSR3	8	-2.14514	0.0370514	0.27202
SORT1	-0.896088	-0.40286	-2.12856	0.0385475	0.274846	-4.05286	SORT1	39	-2.14441	0.0371129	0.272292
C7orf26	-0.252831	0.0303314	-2.15131	0.0366087	0.267751	-4.00971	C7orf26	21	-2.1427	0.0372576	0.273008
SERINC1	0.399562	-0.0779157	2.16069	0.0358352	0.264779	-3.99182	SERINC1	8	2.14268	0.0372596	0.273008
DAGLB	-0.871723	0.236368	-2.12427	0.0389227	0.276045	-4.06095	DAGLB	36	-2.13981	0.0375034	0.274513
MANEAL	-0.484976	0.0271962	-2.19388	0.0332102	0.25644	-3.92796	MANEAL	2	-2.13968	0.0375143	0.274513
PHKB	-0.266486	0.123892	-2.104	0.0407407	0.283044	-4.09902	PHKB	55	-2.13925	0.0375507	0.274598
MAP4K2	-0.625675	0.0204494	-2.12409	0.038939	0.276045	-4.0613	MAP4K2	28	-2.13789	0.0376668	0.27526
ENDOV	-0.586846	-0.0451018	-2.16865	0.0351893	0.26321	-3.97657	ENDOV	2	-2.1373	0.0377175	0.27526
PMS2	-1.06211	-0.0737474	-2.1219	0.0391321	0.276885	-4.06543	PMS2	36	-2.13728	0.0377192	0.27526
MAN1C1	-1.07074	-0.0276283	-2.15224	0.0372971	0.269907	-4.01625	MAN1C1	1	-2.14583	0.0377401	0.27526
SRP14	-0.298668	0.0985326	-2.08926	0.0421097	0.288441	-4.12653	SRP14	118	-2.13624	0.0378083	0.275407
NLE1	0.276022	-0.0864585	2.11822	0.0394578	0.278129	-4.07235	NLE1	35	2.13617	0.0378147	0.275407
GLMN	0.449374	-0.150194	2.11298	0.0399264	0.279837	-4.08219	GLMN	58	2.1358	0.0378459	0.275407
MARCHF6	0.293921	-0.0402273	2.32582	0.0243814	0.224257	-3.6665	MARCHF6	2	2.13565	0.0378591	0.275407
ARPC3	-0.408191	0.126326	-2.10385	0.0407552	0.283044	-4.09932	ARPC3	100	-2.13464	0.0379456	0.275855
ZRANB2	0.259659	0.0471102	2.07965	0.0430228	0.291267	-4.14436	ZRANB2	104	2.13377	0.0380211	0.276224
CHAC2	0.501593	-0.108896	2.13142	0.0382994	0.274483	-4.04747	CHAC2	13	2.13328	0.0380632	0.276349
PRADC1	-0.5311	-0.210938	-2.20192	0.032601	0.25334	-3.91239	PRADC1	1	-2.13091	0.0382679	0.277655
KLHL6	-0.486395	0.103097	-2.1289	0.0385183	0.274846	-4.05223	KLHL6	13	-2.12996	0.038351	0.277989
CTSG	2.06028	-0.317954	2.1678	0.0387888	0.275683	-3.74676	CTSG	1	2.17043	0.0383639	0.277989
DHX57	0.513317	-0.189273	2.10837	0.040343	0.281692	-4.09085	DHX57	59	2.12945	0.0383953	0.278035
SLC39A14	0.580969	-0.217392	2.11915	0.0393758	0.277726	-4.07061	SLC39A14	19	2.12881	0.0384507	0.278255
SLC19A2	1.21559	-0.563089	2.13766	0.0383912	0.274587	-4.00848	SLC19A2	1	2.13519	0.0385106	0.278508
GFPT1	0.598129	-0.195414	2.10274	0.0408567	0.283501	-4.10139	GFPT1	164	2.12694	0.0386136	0.27907
PRKAR1B	-0.603555	-0.535585	-2.11403	0.0398324	0.27953	-4.08023	PRKAR1B	25	-2.12666	0.0386386	0.27907
CCNDBP1	0.535567	-0.133884	2.13816	0.0377189	0.271722	-4.0347	CCNDBP1	5	2.12575	0.0387181	0.279463
RAD9A	0.43208	0.0441116	2.13011	0.0384125	0.274587	-4.04993	RAD9A	11	2.12415	0.0388582	0.280292
ID1	1.44229	-0.968783	2.12395	0.0397338	0.279014	-4.03551	ID1	2	2.13186	0.0389405	0.280307
POFUT2	0.478325	0.248429	2.12355	0.0389867	0.276207	-4.06232	POFUT2	12	2.12289	0.0389689	0.280307
NOL8	0.279155	-0.00756147	2.07541	0.0434317	0.292435	-4.15222	NOL8	99	2.12284	0.0389736	0.280307
KMT2B	0.266428	0.124524	2.07975	0.0430132	0.291267	-4.14418	KMT2B	73	2.12283	0.0389746	0.280307
HMG20B	0.287945	-0.000103076	2.11673	0.039591	0.278715	-4.07516	HMG20B	26	2.1227	0.0389861	0.280307
TIMM8B	0.494209	0.0765546	2.12031	0.0392727	0.27746	-4.06842	TIMM8B	13	2.12191	0.0390555	0.280625
IL4I1	-1.24885	-1.28511	-2.10891	0.040294	0.281527	-4.08983	IL4I1	8	-2.12068	0.0391638	0.280758
MBTPS2	0.637132	0.190531	2.34393	0.0248656	0.225738	-3.39667	MBTPS2	1	2.14087	0.0391679	0.280758
ODF2L	0.863573	-0.348546	2.12597	0.0387735	0.275683	-4.05774	ODF2L	2	2.12039	0.0391899	0.280758
USP44	0.887628	-1.23969	2.19861	0.0366143	0.267751	-3.9307	USP44	1	2.16418	0.0391953	0.280758
BAG4	0.254955	-0.058925	2.11303	0.0399225	0.279837	-4.08211	BAG4	28	2.12027	0.0392008	0.280758
OCLN	-0.935963	-1.00092	-2.15927	0.0384003	0.274587	-3.93948	OCLN	2	-2.14751	0.039238	0.280758
C1orf21	1.10113	-0.102403	2.1101	0.0401859	0.281302	-4.08759	C1orf21	6	2.1197	0.0392506	0.280758
MIF4GD	-0.427072	-0.0820146	-2.11194	0.0400199	0.280315	-4.08414	MIF4GD	21	-2.11896	0.0393163	0.281047
ARHGAP11A	-0.520002	-0.281385	-2.10373	0.0407655	0.283044	-4.09953	ARHGAP11A	32	-2.11846	0.0393611	0.281187
MCEE	-0.537302	0.16473	-2.12005	0.0392956	0.27746	-4.06891	MCEE	8	-2.11752	0.039445	0.281599
IL6ST	0.891808	0.282392	2.11637	0.0396233	0.278766	-4.07584	IL6ST	3	2.11677	0.0395112	0.281599
DHTKD1	-0.613482	0.225786	-2.09816	0.0412781	0.28518	-4.10993	DHTKD1	52	-2.11651	0.039535	0.281599
RNPEP	-0.357765	0.325045	-2.07843	0.0431398	0.291705	-4.14662	RNPEP	133	-2.1164	0.0395443	0.281599
SNRPD1	0.159761	0.0872566	2.01888	0.0492088	0.314155	-4.2556	SNRPD1	82	2.11639	0.0395453	0.281599
APBA1	1.07313	0.239048	2.12086	0.0392238	0.277357	-4.06738	APBA1	1	2.1161	0.0395712	0.281603
OVCA2	-0.374761	0.0423401	-2.11603	0.039653	0.278799	-4.07646	OVCA2	17	-2.11534	0.0396392	0.281907
IFT172	-0.928786	0.0551432	-2.10168	0.0409538	0.283998	-4.10337	IFT172	19	-2.11457	0.0397079	0.282214
MRC2	0.907964	-0.0613915	2.10023	0.0410871	0.284567	-4.10607	MRC2	26	2.11429	0.0397331	0.282214
ARMC8	-0.278984	0.0542804	-2.07308	0.0436576	0.293601	-4.15653	ARMC8	73	-2.11332	0.0398198	0.28265
SNF8	-0.394915	0.0152048	-2.09849	0.0412475	0.285146	-4.10932	SNF8	31	-2.11235	0.0399075	0.283092
SPATA5	0.257923	-0.111155	2.05569	0.0453758	0.300973	-4.18854	SPATA5	113	2.11068	0.0400573	0.283973
DLAT	0.302115	0.131095	2.06283	0.0446637	0.297847	-4.17543	DLAT	138	2.11001	0.0401184	0.284072
MYL9	-0.430955	0.0710591	-2.13036	0.0383914	0.274587	-4.04947	MYL9	6	-2.10983	0.0401347	0.284072
CEP104	-0.27679	-0.100508	-2.14141	0.037442	0.270603	-4.02854	CEP104	12	-2.1094	0.0401737	0.284072
FMN1	1.44802	-0.102523	2.105	0.0406495	0.283044	-4.09715	FMN1	1	2.10926	0.0401863	0.284072
PLOD1	0.654334	0.0942139	2.09281	0.0417765	0.287649	-4.11992	PLOD1	40	2.10912	0.0401988	0.284072
SLC25A20	-0.741969	0.0719611	-2.09277	0.04178	0.287649	-4.11999	SLC25A20	24	-2.10587	0.0404935	0.285973
RIPOR1	-0.62118	-0.0562346	-2.09116	0.0419311	0.288147	-4.123	RIPOR1	30	-2.10534	0.040542	0.286133
SOGA1	0.387425	0.119441	2.07309	0.0436563	0.293601	-4.1565	SOGA1	95	2.10412	0.0406538	0.286741
FUBP1	-0.177483	0.0734265	-1.98075	0.0534727	0.325932	-4.324	FUBP1	278	-2.10369	0.0406928	0.286834
SLC43A2	-1.65231	-0.287009	-2.09154	0.0418951	0.288147	-4.12228	SLC43A2	3	-2.10228	0.0408219	0.287562
ZBTB18	-0.670364	0.0660344	-2.10392	0.040748	0.283044	-4.09917	ZBTB18	5	-2.10198	0.0408499	0.287577
CHCHD1	-0.36598	-0.0107304	-2.14378	0.0372409	0.26982	-4.02404	CHCHD1	5	-2.10068	0.0409694	0.288236
PSMF1	-0.27209	-0.132921	-2.12462	0.0388925	0.276045	-4.0603	PSMF1	14	-2.09976	0.0410534	0.288501
PKM	0.332644	0.283702	2.04691	0.0462658	0.303277	-4.20463	PKM	1558	2.0997	0.041059	0.288501
SEMA4A	-0.972515	-0.832107	-2.08877	0.0421559	0.288441	-4.12744	SEMA4A	10	-2.09932	0.0410944	0.288568
SFN	-0.32216	0.159296	-2.10926	0.0402621	0.281481	-4.08917	SFN	15	-2.09875	0.0411471	0.288756
ZNF507	0.437734	-0.0958664	2.08554	0.042461	0.28887	-4.13344	ZNF507	27	2.09723	0.0412874	0.289223
CCDC28A	-0.428473	0.045904	-2.10461	0.040685	0.283044	-4.09788	CCDC28A	10	-2.09712	0.0412979	0.289223
CUL1	0.262344	0.128931	2.03999	0.0469777	0.305054	-4.21727	CUL1	142	2.09701	0.0413084	0.289223
PPIG	0.218898	0.11667	2.04289	0.0466786	0.303998	-4.21198	PPIG	72	2.09691	0.0413175	0.289223
URB1	0.283436	0.0118308	2.0445	0.0465134	0.303277	-4.20905	URB1	150	2.09636	0.0413682	0.289395
ZNF639	0.221452	-0.0488856	2.16109	0.0358018	0.264779	-3.99104	ZNF639	11	2.09592	0.041409	0.289499
HIKESHI	0.366214	-0.0678324	2.11702	0.0395651	0.278708	-4.07461	HIKESHI	8	2.09483	0.0415108	0.289944
DNAJC9	-0.323015	-0.0967597	-2.05062	0.0458883	0.302595	-4.19785	DNAJC9	159	-2.09468	0.0415248	0.289944
DCAF17	0.496251	0.040377	2.14096	0.0374804	0.270705	-4.0294	DCAF17	2	2.09396	0.0415915	0.290228
XRCC2	0.37451	-0.0471959	2.13353	0.0381164	0.2737	-4.04347	XRCC2	5	2.09366	0.0416195	0.290241
UBALD2	-0.629562	-0.0872327	-2.22743	0.0310657	0.249052	-3.6129	UBALD2	1	-2.09691	0.0416781	0.290468
TPRKB	-0.322582	0.0907686	-2.07894	0.0430908	0.291551	-4.14568	TPRKB	31	-2.09216	0.0417601	0.290857
FKTN	0.420431	-0.186363	2.11985	0.0393131	0.27746	-4.06928	FKTN	5	2.09173	0.0417996	0.29095
COA4	-0.460545	0.0791172	-2.08867	0.0421647	0.288441	-4.12762	COA4	15	-2.0913	0.0418402	0.291051
PGD	-0.187053	-0.00544045	-1.97218	0.0544734	0.327169	-4.33922	PGD	454	-2.0909	0.0418774	0.291128
CCDC88C	-0.489488	-0.282772	-2.06442	0.0445055	0.297117	-4.17249	CCDC88C	109	-2.09002	0.0419602	0.291521
STK10	-0.459224	0.147648	-2.05908	0.0450362	0.299434	-4.18232	STK10	182	-2.08904	0.042053	0.291984
OBSL1	-1.78831	-0.428182	-2.0915	0.0431976	0.291722	-4.09979	OBSL1	1	-2.10047	0.0422383	0.292975
SOX12	0.35373	0.116276	2.16564	0.0354321	0.263785	-3.98234	SOX12	3	2.08664	0.0422793	0.292975
AFG1L	0.579156	0.139148	2.08156	0.0428402	0.290739	-4.14083	AFG1L	12	2.08621	0.0423202	0.292975
CLN8	-0.860162	0.213482	-2.23507	0.0358248	0.264779	-3.76851	CLN8	1	-2.15081	0.0423301	0.292975
SNX24	-1.00297	-0.380476	-2.10476	0.0414658	0.286122	-4.07104	SNX24	1	-2.09407	0.0423572	0.292975
PTPRR	1.85289	0.437358	2.11324	0.0424394	0.28887	-3.82879	PTPRR	1	2.11224	0.0423661	0.292975
TNFSF4	-0.994172	-0.555263	-2.4375	0.0327401	0.253936	-3.56746	TNFSF4	1	-2.27499	0.0424032	0.292975
HPS4	-0.525747	0.374915	-2.07541	0.0434311	0.292435	-4.15221	HPS4	21	-2.08516	0.0424193	0.292975
RBM33	0.208608	0.0784792	2.04462	0.0465004	0.303277	-4.20882	RBM33	50	2.0848	0.0424534	0.292975
HIF1AN	-0.305798	-0.0936077	-2.07759	0.043221	0.291722	-4.14818	HIF1AN	26	-2.08474	0.0424589	0.292975
PLXDC2	1.14463	0.283895	2.08647	0.043177	0.291722	-4.10464	PLXDC2	3	2.0927	0.0424861	0.292981
PPP6R1	-0.305744	-0.107235	-2.04538	0.0464222	0.303277	-4.20742	PPP6R1	89	-2.08406	0.042524	0.29306
NFRKB	0.183291	0.0766808	2.04634	0.0463244	0.303277	-4.20568	NFRKB	43	2.08351	0.0425756	0.293234
ALDH16A1	-0.352728	0.097881	-2.0549	0.0454551	0.301319	-4.18999	ALDH16A1	64	-2.08285	0.0426391	0.293413
RCN1	0.766438	-0.0251831	2.07111	0.0438487	0.29453	-4.16015	RCN1	18	2.08264	0.0426594	0.293413
ZNF8	0.301738	0.0834449	2.099	0.041201	0.285002	-4.10838	ZNF8	14	2.08241	0.0426806	0.293413
OTULINL	-1.11247	-0.975974	-2.095	0.0423712	0.288611	-4.08899	OTULINL	1	-2.08968	0.042771	0.293806
RASGRP1	-0.945379	-0.503952	-2.06906	0.0440491	0.295697	-4.16394	RASGRP1	16	-2.08122	0.0427944	0.293806
USP35	0.513941	-0.143912	2.12262	0.0390681	0.276608	-4.06406	USP35	2	2.08098	0.0428171	0.293806
PPP2R5B	-0.550985	0.0292366	-2.08987	0.0420522	0.288441	-4.1254	PPP2R5B	5	-2.08032	0.0428806	0.293843
TAPT1	-0.631565	0.137176	-2.0642	0.0445275	0.297117	-4.1729	TAPT1	39	-2.08018	0.0428942	0.293843
DRC1	-2.37322	-0.260846	-2.09691	0.0437157	0.293814	-3.83825	DRC1	1	-2.10387	0.0429072	0.293843
DPYD	0.983917	-0.124575	2.0646	0.0444887	0.297117	-4.17218	DPYD	39	2.07983	0.0429281	0.293843
PPFIA3	0.643367	0.0568215	2.06813	0.0441409	0.295957	-4.16567	PPFIA3	21	2.07953	0.0429568	0.293859
NUDT3	0.340506	0.139089	2.09266	0.0417905	0.287649	-4.1202	NUDT3	12	2.07806	0.0430975	0.29463
MGAT4B	0.519231	0.0303682	2.10454	0.0406918	0.283044	-4.09802	MGAT4B	3	2.0778	0.0431224	0.29463
DNAJC8	-0.239166	0.0600214	-2.01198	0.0499578	0.315926	-4.26805	DNAJC8	147	-2.07633	0.0432639	0.295416
CISD2	0.409735	0.0269567	2.06452	0.0444964	0.297117	-4.17232	CISD2	26	2.07503	0.0433896	0.295969
EXOSC1	-0.294945	0.0524439	-2.08427	0.0425813	0.289511	-4.13579	EXOSC1	17	-2.07494	0.0433982	0.295969
ZSCAN5A	0.352794	0.0644668	2.13262	0.038195	0.274088	-4.04519	ZSCAN5A	4	2.07411	0.0434787	0.296109
PSMA6	-0.241245	0.0292434	-2.00427	0.0508067	0.319015	-4.28194	PSMA6	213	-2.07363	0.0435255	0.296109
EFNB1	1.2193	0.0894656	2.06205	0.044741	0.298184	-4.17687	EFNB1	8	2.07355	0.0435332	0.296109
S100A4	1.01657	-0.344145	2.05953	0.0449913	0.299314	-4.18149	S100A4	25	2.07341	0.0435471	0.296109
SIAE	-1.18899	0.346117	-2.06483	0.0444651	0.297117	-4.17174	SIAE	4	-2.07336	0.0435517	0.296109
PDLIM5	0.869439	-1.05512	2.05978	0.0449666	0.299314	-4.18104	PDLIM5	22	2.07284	0.0436022	0.296271
MCTP2	-0.851746	0.151214	-2.06501	0.0444477	0.297117	-4.17141	MCTP2	7	-2.07236	0.0436491	0.296409
KAT14	0.269411	0.103948	2.08063	0.0429284	0.29116	-4.14254	KAT14	19	2.07187	0.0436971	0.296554
ZNF584	0.583694	0.23793	2.16129	0.0371925	0.26982	-3.97275	ZNF584	1	2.08622	0.0437594	0.296796
CTSH	-1.80847	-1.47481	-2.05725	0.045219	0.300291	-4.18568	CTSH	5	-2.06971	0.0439075	0.297619
STX5	-0.264238	-0.0106698	-2.04575	0.046385	0.303277	-4.20676	STX5	40	-2.06841	0.0440344	0.298298
KIAA0753	-0.287632	0.014986	-2.08692	0.0423305	0.288541	-4.13088	KIAA0753	14	-2.06774	0.0441003	0.298325
C1orf159	0.698574	-0.182531	2.09717	0.04137	0.285638	-4.11179	C1orf159	1	2.06759	0.044115	0.298325
NAA15	0.297579	-0.117688	2.01326	0.049819	0.31553	-4.26576	NAA15	319	2.06731	0.0441427	0.298325
RALB	-0.733088	0.108881	-2.066	0.0443499	0.297117	-4.16959	RALB	5	-2.06728	0.0441456	0.298325
ZMYND11	0.607751	0.101838	2.05174	0.0457741	0.302533	-4.19579	ZMYND11	32	2.06618	0.0442534	0.298782
MARVELD1	0.846382	0.263771	2.10475	0.0421411	0.288441	-4.07722	MARVELD1	1	2.08069	0.0442913	0.298782
SMARCE1	0.194073	0.0730018	1.98285	0.0532303	0.325703	-4.32027	SMARCE1	125	2.06572	0.0442985	0.298782
PPP3CA	-0.467521	0.283629	-2.045	0.0464611	0.303277	-4.20812	PPP3CA	53	-2.06519	0.0443515	0.298782
UBXN10	-2.1821	-0.220227	-2.10006	0.0459258	0.302595	-3.98922	UBXN10	1	-2.11381	0.0443594	0.298782
TMX1	0.24891	0.025346	2.01768	0.049339	0.314155	-4.25778	TMX1	79	2.06398	0.0444708	0.298782
CLCC1	0.651284	0.220521	2.04835	0.046119	0.303051	-4.202	CLCC1	38	2.06394	0.0444741	0.298782
ZMYM5	-0.41836	-0.0976876	-2.17949	0.0343264	0.260083	-3.95574	ZMYM5	1	-2.06392	0.044477	0.298782
CAPZA1	-0.204541	0.00129878	-1.97768	0.0538299	0.326144	-4.32947	CAPZA1	189	-2.06382	0.0444867	0.298782
TXNRD2	0.501185	0.419524	2.05095	0.045855	0.302595	-4.19725	TXNRD2	28	2.0637	0.0444985	0.298782
SLC4A2	0.752702	-0.0549145	2.04905	0.046048	0.302904	-4.20073	SLC4A2	32	2.06353	0.0445155	0.298782
NCF4	-0.862816	0.375513	-2.04684	0.0462733	0.303277	-4.20477	NCF4	58	-2.06333	0.0445354	0.298782
MBTPS1	0.30438	-0.176891	2.09106	0.0419405	0.288147	-4.12318	MBTPS1	10	2.0629	0.0445772	0.298882
ARMC6	0.338228	-0.0214094	2.03257	0.0477521	0.308105	-4.23078	ARMC6	69	2.06235	0.0446319	0.299068
SETD1B	-0.370099	0.106793	-2.04829	0.0461247	0.303051	-4.2021	SETD1B	31	-2.06172	0.0446941	0.299159
FAM49B	-0.418763	0.0235868	-2.03273	0.0477349	0.308105	-4.23049	FAM49B	112	-2.06167	0.0446992	0.299159
CNKSR2	1.24228	-0.457021	2.0603	0.0449144	0.29916	-4.18007	CNKSR2	1	2.06133	0.0447331	0.299207
ESF1	0.408038	-0.180336	2.03347	0.0476579	0.308033	-4.22915	ESF1	88	2.06104	0.0447625	0.299223
SMARCAL1	-0.223156	0.042395	-2.04662	0.0462954	0.303277	-4.20516	SMARCAL1	32	-2.05991	0.0448744	0.299791
EHD1	-0.728499	-0.169374	-2.03886	0.0470954	0.305461	-4.21934	EHD1	114	-2.05821	0.045044	0.300743
ROGDI	0.576219	0.154658	2.06857	0.0440979	0.295847	-4.16486	ROGDI	4	2.05723	0.0451427	0.301222
C15orf41	0.293151	0.0900429	2.08757	0.0422685	0.288524	-4.12966	C15orf41	10	2.05637	0.0452285	0.301614
CDK5	0.258489	0.0155586	2.03025	0.0479964	0.309144	-4.235	CDK5	43	2.05572	0.0452942	0.301871
HPCAL1	0.819308	0.24619	2.0425	0.0467187	0.304043	-4.21269	HPCAL1	22	2.05528	0.045338	0.301982
LIX1L	0.272664	-0.00547737	2.05433	0.0455133	0.301339	-4.19105	LIX1L	23	2.05471	0.0453949	0.30218
TXNL4B	0.279146	0.0860425	2.09035	0.0420069	0.288425	-4.1245	TXNL4B	10	2.0544	0.0454264	0.302209
SLC5A3	-0.46278	-0.151075	-2.05827	0.0451177	0.299797	-4.18382	SLC5A3	9	-2.05324	0.0455439	0.30281
SGTA	0.281216	0.0340547	2.01325	0.0498195	0.31553	-4.26577	SGTA	81	2.05286	0.0455821	0.302855
ZSWIM6	-0.679489	0.338082	-2.16547	0.0376507	0.271583	-3.85095	ZSWIM6	1	-2.07565	0.0456051	0.302855
MGAT3	-1.18914	-0.489209	-2.0834	0.0455169	0.301339	-4.1274	MGAT3	1	-2.08002	0.0456674	0.303087
ZNF141	-1.60661	-0.14761	-2.05683	0.0465915	0.303609	-4.16261	ZNF141	1	-2.06383	0.0457679	0.303574
CDK2AP1	0.515748	0.0806312	2.05003	0.0459477	0.302595	-4.19892	CDK2AP1	9	2.04892	0.0459809	0.304615
CLASRP	0.231425	0.0279784	2.05643	0.045302	0.300663	-4.1872	CLASRP	22	2.04881	0.0459924	0.304615
HCLS1	-0.507793	0.0275582	-2.0236	0.0487028	0.312608	-4.24707	HCLS1	137	-2.04867	0.0460069	0.304615
NGFR	-2.30326	-1.46565	-2.04103	0.0473974	0.306705	-4.18487	NGFR	1	-2.05225	0.0461511	0.305388
ANKRD66	-0.596962	0.303329	-2.90036	0.0122949	0.1585	-2.71567	ANKRD66	1	-2.18981	0.0462337	0.305552
AMZ2	-0.33285	-0.259107	-2.08687	0.0423349	0.288541	-4.13097	AMZ2	6	-2.04631	0.0462473	0.305552
TRIM27	0.219453	-0.0271189	2.04573	0.0463863	0.303277	-4.20679	TRIM27	26	2.0462	0.0462584	0.305552
C1orf52	0.312285	-0.0115784	2.04978	0.0459737	0.302595	-4.19939	C1orf52	18	2.04574	0.0463064	0.305688
TTI2	0.298568	-0.117558	2.03229	0.0477814	0.308115	-4.23129	TTI2	31	2.04503	0.0463788	0.305984
OSBPL11	-0.225442	-0.0384132	-2.00615	0.0505987	0.318352	-4.27856	OSBPL11	54	-2.04432	0.0464513	0.306282
ANP32E	0.254835	0.103938	1.98107	0.0534361	0.325932	-4.32344	ANP32E	226	2.04337	0.0465488	0.306591
IL15RA	-0.562858	0.0945924	-3.05585	0.00910768	0.134085	-2.45561	IL15RA	1	-2.18612	0.0465534	0.306591
PLEKHF2	-0.873264	0.0104201	-2.02959	0.0480665	0.309416	-4.23621	PLEKHF2	23	-2.04269	0.0466192	0.306843
ZNF232	0.65603	0.338719	2.07549	0.0434233	0.292435	-4.15206	ZNF232	1	2.04151	0.0467404	0.307459
STRN	-0.20128	0.0331636	-1.96889	0.0548622	0.327848	-4.34505	STRN	108	-2.0405	0.0468456	0.30786
CHCHD3	0.22427	0.0661045	1.97383	0.0542792	0.326864	-4.33629	CHCHD3	137	2.04019	0.0468768	0.30786
SHC1	-0.391389	0.0139248	-2.02499	0.0485548	0.311921	-4.24455	SHC1	34	-2.04012	0.0468843	0.30786
CLUAP1	-0.608547	0.186376	-2.04721	0.0462352	0.303277	-4.20408	CLUAP1	4	-2.03908	0.0469922	0.308348
PGPEP1	-0.678767	-0.468934	-2.04229	0.0467401	0.304043	-4.21307	PGPEP1	4	-2.03865	0.0470365	0.308348
STAP1	-1.69707	0.113341	-2.02501	0.0485523	0.311921	-4.24451	STAP1	15	-2.0386	0.0470418	0.308348
CCDC14	0.441321	-0.113688	2.03363	0.0476405	0.308033	-4.22885	CCDC14	16	2.03695	0.0472135	0.309291
ARPC2	-0.382403	0.09146	-2.00057	0.0512179	0.320616	-4.28858	ARPC2	229	-2.03651	0.0472596	0.309411
CAND1	0.222528	0.0487851	1.95264	0.0568167	0.331211	-4.37373	CAND1	431	2.03609	0.0473032	0.309514
CTDP1	-0.383512	0.160355	-2.00663	0.0505458	0.318352	-4.2777	CTDP1	89	-2.03529	0.0473868	0.30988
C18orf32	-0.459258	-0.0125677	-2.04751	0.0462048	0.303277	-4.20354	C18orf32	6	-2.03405	0.0475161	0.310521
LTF	-0.886289	-0.272444	-2.03665	0.0473255	0.306418	-4.22337	LTF	2	-2.03382	0.0475406	0.310521
HAAO	-1.34302	0.0711655	-2.02178	0.0488976	0.313316	-4.25036	HAAO	7	-2.03339	0.0475855	0.310631
EGFR	-0.892268	-0.242913	-2.41921	0.0321719	0.251753	-3.52576	EGFR	1	-2.18983	0.047682	0.311079
KPNA1	-0.213435	0.033295	-1.98212	0.0533139	0.325932	-4.32156	KPNA1	66	-2.03063	0.0478753	0.312157
ZFYVE21	-0.424064	-0.0956159	-2.04006	0.0469711	0.305054	-4.21715	ZFYVE21	8	-2.02951	0.0479935	0.312745
OGFRL1	-1.29859	0.162454	-2.01769	0.0493381	0.314155	-4.25776	OGFRL1	6	-2.02864	0.0480858	0.313101
UTP18	0.334393	-0.0265615	2.00135	0.0511311	0.320433	-4.28718	UTP18	61	2.02846	0.0481044	0.313101
SLC6A6	-0.592559	-0.552691	-2.08153	0.0433559	0.292435	-4.14533	SLC6A6	1	-2.0324	0.0482043	0.313567
DPP8	0.286353	0.154985	2.00376	0.0508637	0.319117	-4.28286	DPP8	42	2.02595	0.0483708	0.314467
RANBP1	0.232336	0.0515196	1.96347	0.0555068	0.329082	-4.35463	RANBP1	139	2.02559	0.0484099	0.314537
NMNAT1	-0.557172	0.0895937	-2.01501	0.0496279	0.315273	-4.26259	NMNAT1	21	-2.02526	0.0484447	0.31458
ARAF	-0.385841	0.068311	-2.01123	0.0500398	0.316124	-4.26941	ARAF	29	-2.02328	0.0486559	0.315345
PRRC2A	0.223005	-0.0251798	1.95403	0.0566467	0.331211	-4.37127	PRRC2A	165	2.02323	0.0486608	0.315345
WRAP73	-0.263885	-0.0678039	-2.135	0.03799	0.273145	-4.04069	WRAP73	4	-2.02313	0.0486715	0.315345
AHRR	-1.22257	-0.0649371	-2.52718	0.0320543	0.251419	-3.38374	AHRR	1	-2.24988	0.0487063	0.315345
BLOC1S5	-0.449174	0.217459	-2.0332	0.0476863	0.308037	-4.22964	BLOC1S5	7	-2.02275	0.0487127	0.315345
FLII	-0.289994	0.109252	-1.97163	0.0545384	0.327169	-4.3402	FLII	233	-2.02234	0.0487567	0.315345
TBL1X	-0.674761	-0.128113	-2.03745	0.0472415	0.306053	-4.2219	TBL1X	2	-2.0223	0.048761	0.315345
ZNF28	0.703817	0.106929	2.13855	0.040697	0.283044	-3.90686	ZNF28	1	2.05144	0.048811	0.315486
RETREG2	-0.445805	-0.0602222	-2.02213	0.0488601	0.313256	-4.24973	RETREG2	12	-2.02085	0.0489158	0.315604
PDLIM2	-0.74011	-0.452637	-2.01308	0.0498385	0.31553	-4.26608	PDLIM2	10	-2.02075	0.0489272	0.315604
ELP1	0.349711	-0.013454	1.98504	0.0529777	0.325058	-4.31636	ELP1	138	2.02063	0.0489401	0.315604
ZNF692	0.59014	-0.0644538	2.06477	0.0444715	0.297117	-4.17186	ZNF692	1	2.0206	0.0489428	0.315604
RECQL5	0.247354	-0.0477771	1.98347	0.0531582	0.325634	-4.31915	RECQL5	58	2.01904	0.0491107	0.316256
SPAG6	-2.57567	-0.534031	-2.05818	0.0515403	0.322208	-4.07085	SPAG6	1	-2.07823	0.0491352	0.316256
GJC1	1.06681	0.0406612	2.01607	0.0495131	0.314903	-4.26068	GJC1	2	2.01878	0.0491391	0.316256
WASF3	1.21042	-0.530307	2.03354	0.0491917	0.314155	-4.20572	WASF3	1	2.0326	0.0491619	0.316256
MYL6	-0.355087	0.0880584	-1.97841	0.0537442	0.326024	-4.32816	MYL6	296	-2.01834	0.0491859	0.316256
DCAKD	0.412425	-0.0642225	2.01269	0.0498807	0.315618	-4.26678	DCAKD	19	2.01782	0.0492424	0.316381
LYZ	-1.23382	0.188883	-2.03169	0.0490153	0.313709	-4.1388	LYZ	1	-2.02809	0.0492817	0.316381
SMAD3	-0.914546	0.350424	-2.00761	0.0504373	0.318055	-4.27593	SMAD3	9	-2.01718	0.0493114	0.316381
SLC26A6	0.439404	0.0875822	2.01863	0.0492367	0.314155	-4.25606	SLC26A6	12	2.01695	0.049336	0.316381
ANKRD13B	0.747011	-0.0732446	2.03822	0.0471621	0.305716	-4.22051	ANKRD13B	1	2.0168	0.0493532	0.316381
PBX3	-0.649538	0.102504	-2.01813	0.0492898	0.314155	-4.25695	PBX3	5	-2.01659	0.0493759	0.316381
TIGD7	-1.63582	-0.192869	-2.05754	0.0490116	0.313709	-3.93197	TIGD7	1	-2.05081	0.0494828	0.316884
OTUD7B	-0.972208	-1.03528	-2.00619	0.0505947	0.318352	-4.27849	OTUD7B	7	-2.01529	0.0495166	0.316918
CPEB2	0.555288	-0.273205	2.24126	0.0348985	0.262092	-3.82429	CPEB2	1	2.06906	0.049568	0.317064
TUBB2A	1.34997	-0.401618	2.00648	0.0505628	0.318352	-4.27797	TUBB2A	2	2.01357	0.0497034	0.317748
CLDN12	1.16162	-0.305565	2.09606	0.0455392	0.301339	-3.85485	CLDN12	1	2.05135	0.0497623	0.317828
LBH	-0.497828	-0.0340309	-2.01848	0.0492521	0.314155	-4.25632	LBH	7	-2.01293	0.049773	0.317828
MALT1	-0.534359	0.0497108	-1.99119	0.0522751	0.323513	-4.30539	MALT1	71	-2.01127	0.0499542	0.318802
EMG1	0.299694	0.0386746	1.98702	0.0527501	0.325058	-4.31282	EMG1	46	2.0105	0.0500382	0.318952
SENP6	0.329387	0.0320927	1.98832	0.0526014	0.324711	-4.3105	SENP6	46	2.01021	0.05007	0.318952
NMD3	0.329435	-0.0606611	1.98517	0.0529629	0.325058	-4.31613	NMD3	54	2.01004	0.0500889	0.318952
CALHM2	0.687879	-0.0405604	2.01667	0.0494486	0.314673	-4.25961	CALHM2	3	2.00981	0.0501138	0.318952
HAGH	-0.621069	0.100969	-1.99318	0.0520489	0.323092	-4.30182	HAGH	47	-2.00968	0.0501287	0.318952
S100A9	-0.75293	-0.278142	-2.00903	0.0502815	0.317252	-4.27338	S100A9	4	-2.00923	0.0501778	0.318952
PAGR1	0.27056	-0.0139002	2.14411	0.0372128	0.26982	-4.02341	PAGR1	3	2.00921	0.0501803	0.318952
SP110	-0.413718	-0.191549	-1.99092	0.0523056	0.323513	-4.30587	SP110	42	-2.00881	0.0502238	0.318952
LMF2	0.729614	0.231344	2.01316	0.0498297	0.31553	-4.26594	LMF2	3	2.0087	0.0502357	0.318952
CCDC86	0.295782	-0.17962	1.98503	0.052979	0.325058	-4.31638	CCDC86	45	2.00817	0.0502943	0.318972
ZNF398	0.486771	0.173111	2.08001	0.0429881	0.291267	-4.14369	ZNF398	1	2.00815	0.0502962	0.318972
ARHGAP26	-0.618185	-0.0704453	-1.99573	0.0517617	0.322208	-4.29727	ARHGAP26	24	-2.00769	0.050347	0.319113
AHDC1	0.663773	0.088665	1.99165	0.0522231	0.323513	-4.30457	AHDC1	40	2.00701	0.0504222	0.319191
CLPTM1	0.382319	-0.231051	1.99609	0.0517205	0.322208	-4.29661	CLPTM1	27	2.00668	0.0504587	0.319191
SLC8A3	0.879939	0.0802894	3.71146	0.00730253	0.119701	-2.09633	SLC8A3	1	2.31014	0.0504808	0.319191
EPSTI1	-0.75585	-0.76003	-2.01507	0.0496216	0.315273	-4.26249	EPSTI1	2	-2.00644	0.0504847	0.319191
PRG4	-1.65545	0.318102	-2.12241	0.050714	0.318716	-3.95068	PRG4	1	-2.11685	0.0505027	0.319191
GNL3	0.319528	0.0907298	1.97097	0.0546164	0.327169	-4.34137	GNL3	96	2.00577	0.0505584	0.319362
TOP1	0.272062	0.067693	1.94598	0.0576335	0.333157	-4.3854	TOP1	413	2.00481	0.0506653	0.319746
ZNF441	-0.483347	0.10788	-2.45392	0.0228891	0.218561	-3.38342	ZNF441	1	-2.06832	0.0506767	0.319746
BTBD7	0.398971	0.0252336	2.05374	0.0455726	0.30138	-4.19213	BTBD7	3	2.00385	0.0507716	0.320163
NT5E	-1.28002	0.448334	-1.99136	0.0522559	0.323513	-4.30508	NT5E	11	-2.00355	0.0508052	0.320193
OSGEP	-0.337127	0.139584	-1.97506	0.0541355	0.326864	-4.33411	OSGEP	69	-2.00325	0.0508378	0.320218
RABEPK	0.414361	0.131448	1.99751	0.0515607	0.322208	-4.29407	RABEPK	19	2.00282	0.0508854	0.320261
TULP3	0.379019	-0.0710365	2.01858	0.049242	0.314155	-4.25615	TULP3	8	2.00267	0.0509022	0.320261
PSMB2	-0.243939	0.0137761	-1.96063	0.0558481	0.329517	-4.35965	PSMB2	71	-2.00207	0.0509686	0.320365
PRMT1	0.333378	0.042287	1.96151	0.0557426	0.329517	-4.3581	PRMT1	214	2.002	0.0509764	0.320365
ACTR10	-0.269619	-0.0566318	-1.97889	0.0536883	0.326024	-4.3273	ACTR10	40	-2.00002	0.0511977	0.321575
BICD2	-0.489961	-0.205924	-1.97692	0.0539185	0.326148	-4.33082	BICD2	89	-1.99938	0.0512695	0.321813
DENND1C	-0.833363	-0.487406	-1.98767	0.0526757	0.324989	-4.31166	DENND1C	17	-1.99916	0.0512935	0.321813
TP53INP1	-1.31224	0.333675	-1.9958	0.0517538	0.322208	-4.29714	TP53INP1	1	-1.99888	0.0513256	0.321833
ARHGAP17	-0.609576	0.259574	-1.97856	0.0537268	0.326024	-4.32789	ARHGAP17	98	-1.99844	0.0513747	0.32196
SEMG2	1.05494	-2.32207	2.18879	0.0458941	0.302595	-3.91015	SEMG2	1	2.11888	0.0514398	0.322187
TXNDC17	-0.290139	0.0477654	-1.96675	0.0551159	0.328164	-4.34883	TXNDC17	62	-1.99737	0.0514944	0.322224
RCBTB1	-0.656533	0.309751	-1.99592	0.0517396	0.322208	-4.29692	RCBTB1	6	-1.99729	0.0515037	0.322224
TSN	-0.271848	0.137336	-1.95792	0.0561744	0.330168	-4.36442	TSN	80	-1.99648	0.0515947	0.322528
CPM	-1.4989	0.306296	-1.98507	0.0529737	0.325058	-4.3163	CPM	5	-1.99634	0.0516103	0.322528
RNASEH2C	-0.23344	-0.0256137	-1.96075	0.0558333	0.329517	-4.35943	RNASEH2C	54	-1.99547	0.0517077	0.322682
TGIF2	0.31755	-0.120543	2.08395	0.0426119	0.289543	-4.13639	TGIF2	3	1.99537	0.0517189	0.322682
RCAN1	-0.981447	0.130447	-1.98589	0.0528797	0.325058	-4.31484	RCAN1	7	-1.9951	0.0517499	0.322682
METTL17	0.385573	0.115385	1.99937	0.0513528	0.32128	-4.29074	METTL17	13	1.99509	0.0517508	0.322682
KIF13B	-0.403851	-0.0942337	-1.96657	0.055138	0.328164	-4.34916	KIF13B	102	-1.99391	0.0518836	0.323329
KIF15	-0.542611	-0.316843	-1.96934	0.0548086	0.327848	-4.34425	KIF15	216	-1.9934	0.0519416	0.323508
SRRT	0.122728	0.0686408	1.79869	0.0784735	0.381568	-4.63526	SRRT	278	1.99298	0.0519897	0.32361
CHMP1A	-0.295889	-0.00631134	-2.02317	0.0487489	0.312724	-4.24785	CHMP1A	9	-1.9927	0.0520212	0.32361
EIF4B	0.249171	-0.0588704	1.92931	0.0597257	0.336952	-4.41452	EIF4B	292	1.99249	0.0520451	0.32361
TTC32	-0.68528	-0.212827	-2.07987	0.0458613	0.302595	-4.08456	TTC32	1	-2.01765	0.0521331	0.323976
ZNF644	0.255656	0.127942	1.95337	0.0567275	0.331211	-4.37244	ZNF644	69	1.99122	0.0521886	0.324023
NSMCE1	-0.266978	0.0483012	-1.97705	0.0539032	0.326148	-4.33058	NSMCE1	32	-1.99032	0.0522915	0.324023
MYL12A	-0.439717	0.0187466	-2.10143	0.0422659	0.288524	-4.01541	MYL12A	2	-2.00211	0.0522986	0.324023
HLA-B	-0.684541	-0.326088	-1.97104	0.0546077	0.327169	-4.34124	HLA-B	116	-1.99007	0.0523194	0.324023
ZNF622	-0.300849	-0.0191879	-1.96633	0.0551658	0.328164	-4.34958	ZNF622	47	-1.9898	0.0523508	0.324023
BAIAP2L1	-2.02416	-1.07138	-1.98	0.0535598	0.326024	-4.32534	BAIAP2L1	1	-1.98951	0.0523835	0.324023
CAPG	-1.23444	-0.529973	-1.97397	0.0542632	0.326864	-4.33605	CAPG	107	-1.9895	0.0523843	0.324023
EED	0.21267	0.0268249	1.9499	0.0571511	0.331989	-4.37853	EED	55	1.98925	0.0524134	0.324023
GM2A	-1.11425	0.346927	-1.97578	0.0540508	0.326771	-4.33283	GM2A	23	-1.98909	0.0524314	0.324023
MVB12A	-0.549571	0.172478	-1.97888	0.0536897	0.326024	-4.32732	MVB12A	21	-1.98898	0.052444	0.324023
DENND1B	-0.601708	-0.402941	-1.98337	0.0531702	0.325634	-4.31934	DENND1B	11	-1.98862	0.0524844	0.324023
ALS2	0.363498	0.136756	1.98169	0.0533639	0.325932	-4.32233	ALS2	23	1.98857	0.05249	0.324023
SEPTIN11	0.734093	0.120248	1.97277	0.0544037	0.327128	-4.33817	SEPTIN11	39	1.98765	0.0525958	0.324496
NBR1	0.534426	-0.287507	1.98512	0.0529688	0.325058	-4.31622	NBR1	10	1.98704	0.0526649	0.324742
GCSAML	-1.05894	-0.899268	-2.0372	0.0518782	0.322748	-4.22067	GCSAML	1	-2.02692	0.052726	0.324939
RHEX	-0.834956	-0.844949	-2.03963	0.0516195	0.322208	-4.21649	RHEX	2	-2.02629	0.0527941	0.325118
SAR1B	-0.280862	-0.159343	-1.97695	0.0539149	0.326148	-4.33076	SAR1B	28	-1.98575	0.0528134	0.325118
ERF	0.379237	0.182837	2.00912	0.050272	0.317252	-4.27322	ERF	6	1.9849	0.052911	0.325539
RNF7	0.315294	0.155946	2.18766	0.0336891	0.258061	-3.94	RNF7	1	1.98457	0.0529486	0.32559
RAB11FIP4	-0.797474	-0.345347	-1.98976	0.0524377	0.32388	-4.30794	RAB11FIP4	2	-1.98401	0.0530129	0.325806
FER	0.842129	-0.282214	1.96876	0.054877	0.327848	-4.34527	FER	36	1.98313	0.0531143	0.326106
CNTLN	0.757392	-0.106455	1.97115	0.0545947	0.327169	-4.34104	CNTLN	20	1.98287	0.0531446	0.326106
FAM118A	0.593429	0.316416	1.97368	0.0542975	0.326864	-4.33656	FAM118A	17	1.98259	0.0531763	0.326106
MTMR1	-0.463768	0.128054	-1.96736	0.055044	0.328164	-4.34776	MTMR1	35	-1.98218	0.0532244	0.326106
EML2	-0.621942	-0.174241	-1.96942	0.0547988	0.327848	-4.3441	EML2	26	-1.98187	0.0532599	0.326106
ASXL1	0.255087	-0.113434	1.9959	0.0517417	0.322208	-4.29695	ASXL1	17	1.98185	0.0532624	0.326106
PLCD3	0.742474	-0.163306	2.00933	0.0520186	0.323092	-4.2847	PLCD3	2	1.99695	0.0532669	0.326106
HM13	0.335713	-0.128602	1.95104	0.0570113	0.33135	-4.37652	HM13	83	1.9813	0.0533255	0.326285
BAX	-0.639595	0.0168939	-1.96553	0.0552614	0.328557	-4.35099	BAX	41	-1.98089	0.0533737	0.326377
GLIPR2	1.19035	-0.509055	1.96805	0.0549614	0.328164	-4.34653	GLIPR2	16	1.98067	0.0533991	0.326377
C17orf75	0.3012	0.0756491	1.95459	0.0565786	0.331211	-4.37029	C17orf75	53	1.98039	0.0534317	0.326397
MTMR8	-1.30946	-0.653808	-1.97114	0.0545962	0.327169	-4.34106	MTMR8	3	-1.97965	0.0535174	0.326741
RNF145	0.446365	-0.140412	2.00416	0.0508188	0.319015	-4.28213	RNF145	4	1.97933	0.053554	0.326785
POLR3C	0.287601	0.0393367	1.94823	0.0573565	0.332261	-4.38146	POLR3C	63	1.97889	0.0536058	0.326833
EVPL	-0.764956	-0.138287	-1.98562	0.0529114	0.325058	-4.31533	EVPL	2	-1.97827	0.0536773	0.326833
PACSIN3	0.964715	0.513816	1.96471	0.0553597	0.32879	-4.35245	PACSIN3	28	1.97826	0.0536789	0.326833
GMPPA	-0.305534	-0.0790727	-1.98004	0.0535553	0.326024	-4.32527	GMPPA	19	-1.97825	0.0536794	0.326833
RBM10	0.155961	0.0608677	1.87471	0.0670374	0.35262	-4.5084	RBM10	118	1.97716	0.0538069	0.3273
GALNT6	-0.77841	-0.972715	-1.96745	0.0550325	0.328164	-4.34759	GALNT6	13	-1.97709	0.0538148	0.3273
DCAF12	-0.523246	-0.0910434	-1.9778	0.0538157	0.326144	-4.32925	DCAF12	8	-1.97677	0.0538521	0.327348
AEBP1	-0.654558	-0.292673	-1.96424	0.0554146	0.328941	-4.35326	AEBP1	24	-1.97632	0.0539045	0.327392
UAP1	0.719432	-0.16388	1.95979	0.0559491	0.329652	-4.36113	UAP1	58	1.97616	0.0539235	0.327392
HIC2	0.878428	0.173184	1.99926	0.0519065	0.322748	-4.19149	HIC2	1	1.97951	0.0540651	0.327392
ARHGEF35	-1.64981	-0.431064	-2.07642	0.0523493	0.323513	-3.8967	ARHGEF35	1	-2.05476	0.0540687	0.327392
GNAZ	1.06522	0.300054	1.9633	0.0555271	0.329082	-4.35493	GNAZ	12	1.97475	0.0540884	0.327392
POLR3B	0.305777	0.0674752	1.94672	0.0575423	0.332872	-4.38411	POLR3B	59	1.97411	0.0541631	0.327392
MRM2	-0.453986	0.027221	-1.99068	0.0523325	0.323513	-4.30629	MRM2	5	-1.97394	0.0541833	0.327392
NFIX	1.10948	0.328897	1.96241	0.0556345	0.329193	-4.35651	NFIX	10	1.97363	0.0542198	0.327392
PGRMC1	0.316344	-0.115821	1.94806	0.0573769	0.332261	-4.38175	PGRMC1	55	1.97329	0.0542596	0.327392
FAM168A	0.420365	0.207521	2.01388	0.0497511	0.31553	-4.26464	FAM168A	3	1.97308	0.0542839	0.327392
VPS18	-0.273282	0.166369	-1.93735	0.0587088	0.335788	-4.40051	VPS18	73	-1.97279	0.0543185	0.327392
TXN	0.367391	-0.104693	1.94409	0.0578681	0.333889	-4.38872	TXN	93	1.97263	0.0543371	0.327392
HS6ST1	-0.48302	-0.544761	-2.04135	0.0468376	0.304499	-4.2148	HS6ST1	1	-1.97257	0.0543443	0.327392
SYVN1	-0.369306	0.167993	-1.97302	0.0543748	0.327128	-4.33773	SYVN1	16	-1.97255	0.0543465	0.327392
COX11	0.382061	-0.0214257	1.97835	0.0537516	0.326024	-4.32827	COX11	12	1.97252	0.0543501	0.327392
LARGE1	-1.65134	0.090334	-1.98504	0.0541827	0.326864	-4.03275	LARGE1	1	-1.98249	0.0543573	0.327392
RBM48	0.241017	0.0147445	2.03188	0.0478245	0.308215	-4.23204	RBM48	8	1.97244	0.0543594	0.327392
PHF6	0.296613	0.0942352	1.93421	0.0591049	0.335788	-4.406	PHF6	104	1.97199	0.0544128	0.327438
EPHB6	-0.56925	-1.18621	-1.98103	0.0534407	0.325932	-4.32351	EPHB6	4	-1.97164	0.0544532	0.327438
CD109	1.30107	0.187876	1.95784	0.056185	0.330168	-4.36457	CD109	27	1.97148	0.0544721	0.327438
STRA6	-1.14613	-1.66331	-2.00142	0.0535941	0.326024	-4.17553	STRA6	1	-1.99213	0.0544848	0.327438
ZNF174	-0.380531	0.149186	-1.99332	0.0520337	0.323092	-4.30158	ZNF174	6	-1.97012	0.0546331	0.328152
KNOP1	0.328397	0.0406329	1.94376	0.0579086	0.33395	-4.38929	KNOP1	59	1.96926	0.0547344	0.328157
DNMT3B	0.65208	-0.462563	1.95897	0.0560484	0.329888	-4.36258	DNMT3B	18	1.96915	0.054748	0.328157
HAT1	-0.261219	-0.0238441	-1.92121	0.060766	0.339607	-4.42861	HAT1	128	-1.96895	0.0547713	0.328157
SOD1	0.37511	0.189229	1.9348	0.0590301	0.335788	-4.40496	SOD1	217	1.96867	0.0548045	0.328157
C1orf112	-0.409904	-0.33684	-1.96136	0.0557603	0.329517	-4.35836	C1orf112	21	-1.96835	0.0548423	0.328157
CHCHD5	-0.982242	-0.13561	-1.96375	0.0554743	0.329082	-4.35415	CHCHD5	3	-1.96804	0.0548786	0.328157
PSPH	0.468855	-0.00578352	1.95191	0.0569049	0.33135	-4.375	PSPH	40	1.96804	0.0548793	0.328157
SLC25A3	0.237406	0.151073	1.9287	0.0598038	0.336952	-4.41559	SLC25A3	66	1.96789	0.0548967	0.328157
SLC15A4	-0.798439	0.148343	-1.95999	0.0559245	0.329652	-4.36077	SLC15A4	8	-1.9676	0.0549319	0.328157
PAK1IP1	0.243631	0.0275775	1.94164	0.0581725	0.334778	-4.39301	PAK1IP1	44	1.96713	0.0549867	0.328157
FUCA1	-1.29268	0.292331	-1.95285	0.0567905	0.331211	-4.37335	FUCA1	35	-1.96686	0.0550191	0.328157
IL1RAP	-1.02076	-0.217167	-1.95422	0.0566232	0.331211	-4.37093	IL1RAP	18	-1.96661	0.0550489	0.328157
TUBB4B	-0.307454	0.165365	-1.9832	0.0531897	0.325634	-4.31964	TUBB4B	12	-1.96659	0.0550513	0.328157
MLLT3	0.863229	-0.561238	1.9608	0.0558281	0.329517	-4.35935	MLLT3	5	1.96645	0.0550682	0.328157
CTDSPL2	0.330524	-0.0563323	1.93857	0.0585554	0.335593	-4.39837	CTDSPL2	69	1.96628	0.0550883	0.328157
PGK1	0.429042	0.0571583	1.93375	0.0591626	0.335788	-4.40679	PGK1	797	1.96613	0.0551057	0.328157
C1GALT1C1	-0.51146	-0.355269	-1.9754	0.054096	0.326864	-4.33351	C1GALT1C1	5	-1.96554	0.0551766	0.328158
LYSMD1	0.505849	-0.294161	1.96912	0.0548348	0.327848	-4.34464	LYSMD1	7	1.9652	0.0552163	0.328158
U2AF1L4	0.223365	0.0699561	2.16597	0.0354057	0.263765	-3.98171	U2AF1L4	3	1.96515	0.055223	0.328158
CASK	-0.523183	-0.219339	-1.95116	0.0569974	0.33135	-4.37633	CASK	32	-1.96485	0.0552585	0.328158
POLR2G	-0.143829	0.0810772	-1.95349	0.056712	0.331211	-4.37222	POLR2G	32	-1.96471	0.0552746	0.328158
WDR3	0.340119	0.000277344	1.92964	0.0596841	0.336952	-4.41396	WDR3	145	1.96465	0.0552827	0.328158
LMAN2L	0.389103	0.212182	1.96047	0.0558669	0.329517	-4.35992	LMAN2L	18	1.96387	0.0553753	0.328463
MT-CO1	-0.716826	0.0675732	-1.97365	0.0543011	0.326864	-4.33662	MT-CO1	2	-1.96372	0.0553931	0.328463
NFE2L2	-0.574732	-0.261303	-2.00537	0.050685	0.318714	-4.27996	NFE2L2	1	-1.96277	0.0555067	0.328724
SUZ12	0.224314	-0.0218422	1.91688	0.0613279	0.34129	-4.4361	SUZ12	75	1.96273	0.0555119	0.328724
KIF3B	0.370365	-0.214656	1.95304	0.056767	0.331211	-4.37301	KIF3B	26	1.96261	0.0555258	0.328724
WDR70	-0.167418	0.0886245	-1.88649	0.0653989	0.349108	-4.48835	WDR70	84	-1.96217	0.0555787	0.328863
EVI2B	-0.886575	0.0851836	-1.94873	0.0572947	0.332261	-4.38058	EVI2B	24	-1.96159	0.0556481	0.328955
PRR14L	0.230125	0.101196	1.92153	0.0607236	0.339607	-4.42804	PRR14L	65	1.96155	0.0556533	0.328955
UBE2D1	-0.376749	0.0396451	-2.00064	0.0512102	0.320616	-4.28845	UBE2D1	4	-1.96091	0.05573	0.329085
THAP12	0.240503	0.093142	1.93576	0.0589088	0.335788	-4.40329	THAP12	43	1.96057	0.0557708	0.329085
ZNF609	0.411529	0.138819	1.93908	0.0584917	0.335593	-4.39748	ZNF609	60	1.96041	0.0557897	0.329085
MAPK11	-0.941377	-0.0657734	-1.96685	0.0551038	0.328164	-4.34865	MAPK11	1	-1.9603	0.055803	0.329085
MYLK	1.1256	0.172961	1.94584	0.0576514	0.333157	-4.38566	MYLK	35	1.95983	0.05586	0.329085
BRI3BP	-0.618439	0.121229	-1.94895	0.0572681	0.332261	-4.3802	BRI3BP	21	-1.95981	0.0558621	0.329085
RFTN1	-0.831491	0.143472	-1.94324	0.0579735	0.334151	-4.39021	RFTN1	81	-1.95964	0.0558835	0.329085
ARL4C	-1.25763	-1.26898	-1.94938	0.0572155	0.33219	-4.37945	ARL4C	5	-1.9594	0.0559119	0.329085
MX1	-1.94831	-2.20644	-1.94423	0.0578501	0.333889	-4.38847	MX1	57	-1.95839	0.0560333	0.329493
RHOG	-0.315527	-0.275433	-1.93862	0.0585493	0.335593	-4.39829	RHOG	42	-1.95833	0.0560405	0.329493
GAPT	-2.0446	-0.00652487	-1.99785	0.0581719	0.334778	-4.17028	GAPT	1	-2.01206	0.0561755	0.330112
HEATR5A	-0.417263	-0.0130181	-1.97851	0.0537332	0.326024	-4.32799	HEATR5A	5	-1.9568	0.0562258	0.330234
ZNHIT6	0.390367	-0.112346	1.93643	0.0588248	0.335788	-4.40212	ZNHIT6	49	1.9561	0.0563112	0.330487
TDP1	-0.302902	0.02769	-1.9303	0.0596	0.336952	-4.41281	TDP1	54	-1.95573	0.0563557	0.330487
UBQLN4	0.19292	0.156759	1.93069	0.0595507	0.336952	-4.41213	UBQLN4	39	1.95571	0.056358	0.330487
ABHD14B	-0.568349	0.137208	-1.94189	0.0581411	0.334778	-4.39257	ABHD14B	30	-1.95505	0.0564388	0.330787
SRSF11	0.161484	0.033166	1.87875	0.0664717	0.351983	-4.50154	SRSF11	78	1.95422	0.0565391	0.3312
CD1B	0.599887	-0.964434	1.95176	0.0569242	0.33135	-4.37527	CD1B	7	1.95318	0.0566655	0.331618
NUP35	0.190927	0.0460097	1.9348	0.0590292	0.335788	-4.40495	NUP35	35	1.95315	0.05667	0.331618
NOP56	0.231647	0.108363	1.88504	0.0655982	0.349501	-4.49081	NOP56	300	1.95233	0.0567691	0.332023
ARL3	-0.326072	0.0323242	-1.93426	0.0590978	0.335788	-4.4059	ARL3	39	-1.95198	0.0568117	0.332087
SEPTIN9	-0.348596	0.00822274	-1.91239	0.0619147	0.342229	-4.44386	SEPTIN9	426	-1.95176	0.0568396	0.332087
ACADVL	-0.523908	0.19499	-1.92799	0.0598947	0.337021	-4.41683	ACADVL	166	-1.95103	0.0569278	0.332326
SUSD1	-1.15342	-0.174482	-2.01978	0.0551398	0.328164	-4.13102	SUSD1	1	-2.00071	0.0569556	0.332326
COPG1	-0.246969	0.0260569	-1.89049	0.0648507	0.348185	-4.48152	COPG1	276	-1.95069	0.0569702	0.332326
PRAF2	-1.07239	-0.510018	-1.93982	0.0584002	0.335593	-4.3962	PRAF2	7	-1.94977	0.0570823	0.332717
ITPRIP	-0.565953	0.272399	-1.93831	0.0585889	0.335612	-4.39884	ITPRIP	24	-1.94965	0.0570969	0.332717
TOMM40L	0.40371	0.0660031	1.9925	0.0521261	0.323211	-4.30304	TOMM40L	3	1.94893	0.0571854	0.333058
PIP4K2B	0.276343	0.145433	1.93061	0.0595602	0.336952	-4.41226	PIP4K2B	37	1.94824	0.0572702	0.333377
KRTCAP2	0.469626	0.0966573	2.01822	0.0492804	0.314155	-4.25679	KRTCAP2	1	1.94759	0.0573504	0.333669
RAB4A	-1.14425	-0.371535	-1.935	0.0590041	0.335788	-4.4046	RAB4A	11	-1.9465	0.0574854	0.334111
ZNF92	-0.316602	0.0319339	-2.13362	0.0381083	0.2737	-4.04329	ZNF92	1	-1.94598	0.0575495	0.334111
WWP1	0.483879	-0.364353	1.97132	0.0545746	0.327169	-4.34074	WWP1	3	1.94589	0.0575607	0.334111
KAZALD1	1.27129	0.43429	1.99901	0.0553538	0.32879	-4.03883	KAZALD1	1	1.97779	0.0575913	0.334111
NOTCH2	0.91087	-0.10053	1.93386	0.0591481	0.335788	-4.4066	NOTCH2	17	1.94558	0.0575988	0.334111
TRIM44	0.569392	0.0253087	1.95401	0.0566485	0.331211	-4.3713	TRIM44	4	1.94539	0.0576224	0.334111
UBE2Q2	-0.379298	-0.11318	-1.97401	0.0542587	0.326864	-4.33598	UBE2Q2	5	-1.94528	0.0576363	0.334111
ZFP3	0.848913	0.250017	1.95523	0.0565006	0.331211	-4.36916	ZFP3	1	1.94441	0.0577441	0.334366
IFRD1	0.935352	-0.188148	1.93273	0.0592913	0.336175	-4.40857	IFRD1	16	1.94435	0.0577512	0.334366
SUMF2	0.317986	-0.022677	1.92695	0.0600275	0.337257	-4.41864	SUMF2	38	1.94419	0.0577706	0.334366
DNM3	0.525752	0.0423887	1.96275	0.0555938	0.329127	-4.35591	DNM3	3	1.94357	0.0578481	0.334487
CASP10	-0.802372	-0.335684	-1.92958	0.0596912	0.336952	-4.41405	CASP10	31	-1.94312	0.0579037	0.334487
XRN2	0.130691	-0.0344211	1.77895	0.0816984	0.389286	-4.66746	XRN2	277	1.94309	0.0579079	0.334487
BRWD3	0.515742	-0.00727685	1.93962	0.0584252	0.335593	-4.39655	BRWD3	12	1.94305	0.0579117	0.334487
SREBF2	0.31306	-0.00147527	1.95711	0.0562726	0.330509	-4.36585	SREBF2	12	1.94252	0.0579777	0.334695
NHEJ1	-0.222628	0.158292	-1.93868	0.058542	0.335593	-4.39818	NHEJ1	25	-1.93883	0.0584383	0.337179
MAP10	0.914821	-0.0961223	1.95428	0.0573278	0.332261	-4.33965	MAP10	1	1.94371	0.0585245	0.337496
ST13	0.248068	-0.0252536	1.87806	0.0665681	0.351983	-4.50271	ST13	304	1.93774	0.0585749	0.337496
WDR75	0.319507	0.0259037	1.90797	0.0624982	0.344018	-4.45149	WDR75	78	1.93759	0.0585943	0.337496
LIMA1	0.802716	-0.636141	1.92169	0.060703	0.339607	-4.42776	LIMA1	63	1.93742	0.0586145	0.337496
NSD3	0.223047	-0.0428758	1.89293	0.0645178	0.347323	-4.47734	NSD3	73	1.93693	0.0586767	0.337679
COQ7	0.379729	0.296509	1.93016	0.0596177	0.336952	-4.41305	COQ7	21	1.93616	0.0587731	0.338059
DDX10	0.42386	-0.074082	1.9127	0.061874	0.342229	-4.44332	DDX10	80	1.93566	0.0588367	0.33825
BGN	-1.18182	-0.401837	-1.97108	0.0589959	0.335788	-4.33127	BGN	1	-1.96981	0.0588974	0.338424
TGFB1I1	-1.38856	-0.391041	-1.93014	0.0596199	0.336952	-4.41308	TGFB1I1	1	-1.93488	0.0589343	0.338462
PSMA4	-0.242098	0.0112326	-1.87688	0.0667336	0.352346	-4.50472	PSMA4	204	-1.93437	0.0589983	0.33855
CRPPA	0.761449	-0.126165	1.9583	0.0568386	0.331211	-4.36779	CRPPA	1	1.93942	0.0590605	0.33855
SKP1	-0.141522	-0.00801484	-1.81387	0.0760674	0.376782	-4.61029	SKP1	138	-1.93387	0.0590622	0.33855
NME6	-0.576083	-0.0221228	-1.95566	0.0564491	0.331196	-4.36841	NME6	2	-1.9338	0.0590714	0.33855
MTDH	0.248069	0.0470003	1.88094	0.0661671	0.351088	-4.49781	MTDH	160	1.93332	0.0591313	0.33869
TMX3	0.382733	0.0663164	1.91028	0.0621923	0.343098	-4.4475	TMX3	65	1.93312	0.0591566	0.33869
BLVRB	-0.641574	0.343252	-1.91607	0.0614338	0.341708	-4.43751	BLVRB	47	-1.93163	0.0593461	0.3396
RANGRF	-0.512717	-0.261659	-1.92839	0.0598437	0.336952	-4.41614	RANGRF	11	-1.93092	0.0594361	0.33994
TBL3	0.325216	0.00973857	1.89775	0.0638639	0.34568	-4.46907	TBL3	105	1.93017	0.0595313	0.34031
NAGK	-0.571637	0.263554	-1.91163	0.0620152	0.342376	-4.44518	NAGK	66	-1.92945	0.0596226	0.340657
RNF220	0.231253	0.0480423	1.92377	0.0604353	0.338892	-4.42416	RNF220	27	1.92863	0.0597275	0.341034
ZNF653	0.393208	-0.0991289	1.99283	0.0520886	0.323159	-4.30245	ZNF653	2	1.92835	0.0597625	0.341034
GBP1	0.862644	-0.321713	1.91271	0.0618732	0.342229	-4.44331	GBP1	56	1.92781	0.0598319	0.341034
MRPS24	-0.249483	-0.0324328	-1.95807	0.0561562	0.330168	-4.36415	MRPS24	12	-1.92759	0.0598603	0.341034
JAM2	1.3769	0.407177	1.9199	0.0609353	0.340087	-4.43087	JAM2	2	1.92751	0.0598703	0.341034
POC1A	-0.36582	-0.277612	-1.93558	0.058931	0.335788	-4.40359	POC1A	11	-1.9273	0.0598968	0.341034
EAF1	0.301334	0.0454906	1.95647	0.0563501	0.330789	-4.36698	EAF1	8	1.92725	0.0599031	0.341034
KYNU	-2.23945	-2.51752	-1.91408	0.0616934	0.34218	-4.44094	KYNU	7	-1.92686	0.059953	0.341144
PRDX6	0.301147	0.326812	1.88084	0.0661799	0.351088	-4.49797	PRDX6	329	1.9259	0.0600757	0.341402
PTPRD	-1.08697	-0.756398	-1.91807	0.0611729	0.340671	-4.43404	PTPRD	4	-1.9258	0.0600884	0.341402
SOWAHD	0.855319	0.411767	1.93553	0.0589383	0.335788	-4.40369	SOWAHD	1	1.92565	0.0601087	0.341402
HELZ	0.226252	0.0853694	1.87305	0.0672712	0.35262	-4.51122	HELZ	109	1.92535	0.060146	0.341402
CERK	-0.74318	0.170316	-1.92732	0.0599803	0.337257	-4.418	CERK	3	-1.92512	0.0601756	0.341402
GIMAP2	0.724193	-0.0679478	1.91436	0.0616563	0.34218	-4.44045	GIMAP2	17	1.92484	0.0602115	0.341402
METAP1D	0.344147	0.0987841	1.95376	0.0566795	0.331211	-4.37175	METAP1D	6	1.92483	0.0602131	0.341402
ITPR3	-0.651887	-0.28485	-1.90532	0.06285	0.344896	-4.45606	ITPR3	96	-1.92334	0.0604045	0.342278
MEX3C	0.33109	-0.0115811	1.93402	0.0591283	0.335788	-4.40632	MEX3C	12	1.92311	0.0604339	0.342278
SAC3D1	-0.451349	-0.223573	-1.92109	0.0607813	0.339607	-4.42881	SAC3D1	13	-1.92273	0.0604836	0.342278
BST1	-2.27049	-0.64213	-1.91213	0.0619499	0.342229	-4.44432	BST1	1	-1.92245	0.060519	0.342278
DOCK5	-0.861207	-1.38614	-1.9124	0.0619138	0.342229	-4.44385	DOCK5	12	-1.92243	0.0605215	0.342278
GSTCD	0.249349	0.0202067	1.90219	0.0632682	0.345137	-4.46145	GSTCD	38	1.92125	0.0606744	0.342726
LANCL2	-0.493794	-0.125807	-1.90647	0.0626972	0.344602	-4.45408	LANCL2	37	-1.92122	0.0606789	0.342726
FANCC	0.35757	-0.0593741	2.0021	0.0510479	0.320092	-4.28584	FANCC	2	1.92111	0.060693	0.342726
ADIPOR2	0.943829	0.237561	1.91867	0.0610948	0.340503	-4.433	ADIPOR2	2	1.91952	0.0608983	0.343318
WDR11	0.425345	0.0930725	1.89498	0.0642388	0.34674	-4.47382	WDR11	105	1.91941	0.0609128	0.343318
ARHGEF3	-1.13562	-0.665029	-1.91236	0.0619197	0.342229	-4.44392	ARHGEF3	3	-1.91927	0.0609312	0.343318
WARS2	0.408148	0.224613	1.90542	0.0628362	0.344896	-4.45588	WARS2	33	1.91912	0.0609501	0.343318
DUS4L	0.570567	0.124585	1.95903	0.0560407	0.329888	-4.36247	DUS4L	1	1.91911	0.060952	0.343318
ACSM3	1.09716	0.14305	1.91232	0.0619245	0.342229	-4.44399	ACSM3	3	1.91875	0.0609977	0.343401
ASB7	0.354951	-0.0133056	1.95152	0.056953	0.33135	-4.37569	ASB7	5	1.91838	0.0610461	0.3435
LETMD1	0.465953	0.184829	1.92011	0.0609078	0.340087	-4.43051	LETMD1	9	1.91798	0.0610977	0.343617
BTN3A1	0.534602	0.0713443	1.94442	0.0578271	0.333889	-4.38814	BTN3A1	2	1.91759	0.0611496	0.343735
ALDH1B1	0.781864	-0.0822468	1.90256	0.0632183	0.345081	-4.46081	ALDH1B1	46	1.91731	0.0611861	0.343767
COQ4	-0.527845	0.15067	-1.92832	0.059852	0.336952	-4.41625	COQ4	4	-1.9169	0.0612388	0.343889
MED27	-0.161183	-0.0499223	-1.98345	0.0531601	0.325634	-4.31918	MED27	15	-1.91643	0.0613005	0.344062
TUBB8	-0.37794	0.0468483	-1.90377	0.0630567	0.345081	-4.45873	TUBB8	30	-1.91589	0.0613712	0.344285
ZC3H8	0.51167	0.0212011	1.90202	0.0632906	0.345137	-4.46174	ZC3H8	30	1.91478	0.0615156	0.344902
ZNF460	0.310141	0.126906	1.93377	0.0591605	0.335788	-4.40677	ZNF460	10	1.91457	0.0615431	0.344902
SCPEP1	-0.545349	0.529717	-1.89828	0.0637932	0.34568	-4.46817	SCPEP1	46	-1.91424	0.0615862	0.344926
TRAF1	-1.29219	-1.87451	-1.90562	0.0628097	0.344896	-4.45554	TRAF1	3	-1.91406	0.0616095	0.344926
ARHGEF12	-1.10178	0.11558	-1.9008	0.0634535	0.345243	-4.46383	ARHGEF12	24	-1.91373	0.0616532	0.344998
STRN3	0.242087	0.0657865	1.88227	0.0659826	0.350738	-4.49555	STRN3	53	1.91215	0.0618599	0.34598
ETV4	-1.63214	-0.487002	-2.0262	0.0635639	0.345243	-4.17335	ETV4	1	-2.03141	0.0619336	0.346061
SMIM1	-1.588	0.250771	-5.4551	0.00501408	0.0976558	-2.0045	SMIM1	1	-2.42327	0.0619621	0.346061
ZKSCAN1	0.415482	0.0218884	1.90025	0.0635273	0.345243	-4.46477	ZKSCAN1	27	1.91113	0.0619941	0.346061
SLC35E3	-0.828067	0.209632	-1.92197	0.060667	0.339607	-4.42728	SLC35E3	1	-1.91096	0.0620169	0.346061
RAB37	-1.12351	-0.554313	-1.89906	0.0636881	0.345443	-4.46683	RAB37	14	-1.91086	0.0620298	0.346061
PLEKHG2	-0.274538	0.0455195	-1.93648	0.0588185	0.335788	-4.40203	PLEKHG2	10	-1.90832	0.0623659	0.347349
MTFR1	0.357538	0.0406676	1.91509	0.0615606	0.34218	-4.43919	MTFR1	12	1.90812	0.0623915	0.347349
NUDT11	1.16362	0.523045	1.90278	0.0631886	0.345081	-4.46043	NUDT11	2	1.90808	0.062397	0.347349
[truncated: 9,132 more rows]
