# Supplementary material for: Multi-omics molecular phenotyping of childhood acute lymphoblastic leukemia cell lines reveals novel drug vulnerabilities
Source: Research Square preprint supplement (doi:10.21203/rs.3.rs-443839/v1), 2021-04-29
Supplement: Supplementary file 8 [file 9a0e0b973d60e24ae48e6fdf.xlsx]

## Sheet: Supp_Table_4
Supplementary Table 4: Feature data for the 528 drugs in the DSRT panel
DRUG NAME	Mechanism Targets	Putative Target Proteins	Class explained	High phase Approval status	Solvent	High conc (nM)	InChI	ChEMBL ID
Pilocarpine	Non-selective muscarinic receptor agonist	CHRM1;CHRM3;CHRM2;CHRM4	X.Other	Approved	DMSO	40000	QCHFTSOMWOSFHM-WPRPVWTQSA-N	CHEMBL550,CHEMBL611494,CHEMBL1200330,CHEMBL1213136,CHEMBL2139597
Lovastatin	HMG-CoA reductase inhibitor	HMGCR	H.Metabolic modifier	approved (non-oncology)	DMSO	10000	PCZOHLXUXFIOCF-BXMDZJJMSA-N	CHEMBL503
Gefitinib	EGFR inhibitor	EGFR	B.Kinase inhibitor	Approved	DMSO	10000	XGALLCVXEZPNRQ-UHFFFAOYSA-N	CHEMBL939
Metformin	AMPK activator	PRKAA1	H.Metabolic modifier	Approved (non-oncology)	AQ	100000	XZWYZXLIPXDOLR-UHFFFAOYSA-N	CHEMBL1431
Anagrelide	PDE-3, PLA2 inhibitor	PDE3A	X.Other	Approved	DMSO	10000	OTBXOEAOVRKTNQ-UHFFFAOYSA-N	CHEMBL1200759,CHEMBL760
Imatinib	ABL, Kit, PDGFRB inhibitor	ABL1;PDGFRA;PDGFRB;RET;KIT	B.Kinase inhibitor	Approved	DMSO	10000	KTUFNOKKBVMGRW-UHFFFAOYSA-N	CHEMBL1642,CHEMBL941
Idarubicin	Topoisomerase II inhibitor	TOP2A;TOP2B	A.Conv.Chemo	Approved	DMSO	1000	XDXDZDZNSLXDNA-TZNDIEGXSA-N	CHEMBL1117,CHEMBL1200976
Vatalanib	VEGFR-1 & -2 inhibitor	KDR;FLT1	B.Kinase inhibitor	Investigational (Ph 3)	DMSO	10000	YCOYDOIWSSHVCK-UHFFFAOYSA-N	CHEMBL101253,CHEMBL2142861,CHEMBL75232
Erlotinib	EGFR inhibitor	EGFR	B.Kinase inhibitor	Approved	DMSO	10000	AAKJLRGGTJKAMG-UHFFFAOYSA-N	CHEMBL1079742,CHEMBL553
Miltefosine	Antimicrobial, inhibits PI3K.AKT	PIK3CA;PIK3CB;PIK3CD;PIK3CG;AKT1;AKT2;AKT3	X.Other	Approved	AQ	100000	PQLXHQMOHUQAKB-UHFFFAOYSA-N	NA
Dexamethasone	Glucocorticoid, immunomodulatory agent	NR3C1;NR0B1;ANXA1;NOS2;NR1I2	D.Immunomodulatory	Approved	DMSO	10000	UREBDLICKHMUKA-CXSFZGCWSA-N	CHEMBL1200637,CHEMBL384467,CHEMBL1201302
Auranofin	Antirheumatic agent	PRDX5;IKBKB	A.Conv.Chemo	Approved	DMSO	2500	AUJRCFUBUPVWSZ-XTZHGVARSA-M	CHEMBL1366
Tretinoin	Retinoic acid receptor agonist	RARA;RARB;RXRA;RXRB;RXRG	E.Differentiating.epigenetic modifier	Approved	DMSO	10000	SHGAZHPCJJPHSC-YCNIQYBTSA-N	CHEMBL38,CHEMBL2051965
Simvastatin	HMG CoA reductase inhibitor	HMGCR	H.Metabolic modifier	Approved (non-oncology)	DMSO	10000	RYMZZMVNJRMUDD-HGQWONQESA-N	CHEMBL1064
Goserelin	Gonadotropin releasing hormone superagonist	LHCGR;GNRHR	F.Hormone therapy	Approved	DMSO	10000	BLCLNMBMMGCOAS-URPVMXJPSA-N	CHEMBL1201247,CHEMBL1200501
Raloxifene	Selective estrogen receptor modulator	ESR1;ESR2;SERPINB9;TFF1	F.Hormone therapy	Approved	DMSO	10000	GZUITABIAKMVPG-UHFFFAOYSA-N	CHEMBL1116,CHEMBL81
Plicamycin	RNA synthesis inhibitor	RNA	A.Conv.Chemo	Approved	DMSO	10000	CFCUWKMKBJTWLW-BGLFSJPPSA-N	CHEMBL1237054
Lapatinib	HER2, EGFR inhibitor	EGFR;ERBB2	B.Kinase inhibitor	Approved	DMSO	1000	BCFGMOOMADDAQU-UHFFFAOYSA-N	CHEMBL1076241,CHEMBL554,CHEMBL1201179
Bortezomib	Proteasome inhibitor (26S subunit)	PSMB5;PSMB1	L.Protease.proteasome inhibitor	Approved	DMSO	1000	GXJABQQUPOEUTA-DOTOQJQBSA-N	CHEMBL325041
Letrozole	Aromatase inhibitor	CYP19A1	F.Hormone therapy	Approved	DMSO	10000	HPJKCIUCZWXJDR-UHFFFAOYSA-N	CHEMBL1444
Bexarotene	Antineoplastic agent; retinoid specifically selective for retinoid X receptors	RXRA;RXRB	E.Differentiating.epigenetic modifier	Approved	DMSO	10000	NAVMQTYZDKMPEU-UHFFFAOYSA-N	CHEMBL1023
Celecoxib	Selective COX-2 inhibitor	PTGS2	J.NSAID	Approved	DMSO	10000	RZEKVGVHFLEQIL-UHFFFAOYSA-N	CHEMBL118,CHEMBL395268,CHEMBL1801594
Anastrozole	Aromatase inhibitor	CYP19A1	F.Hormone therapy	Approved	DMSO	10000	YBBLVLTVTVSKRW-UHFFFAOYSA-N	CHEMBL1399
Bicalutamide	Nonsteriodal antiandrogen	AR	F.Hormone therapy	Approved	DMSO	10000	LKJPYSCBVHEWIU-UHFFFAOYSA-N	CHEMBL409
Clofarabine	Antimetabolite; Purine analog	RRM1	A.Conv.Chemo	Approved	DMSO	10000	WDDPHFBMKLOVOX-AYQXTPAHSA-N	CHEMBL1750
Vincristine	Mitotic inhibitor, Vinca alkaloid microtubule depolymerizer	TUBB;TUBA4A	A.Conv.Chemo	Approved	DMSO	1000	OGWKCGZFUXNPDA-XQKSVPLYSA-N	CHEMBL501867,CHEMBL90555
Vinorelbine	Mitotic inhibitor, Vinca alkaloid microtubule depolymerizer	TUBB	A.Conv.Chemo	Approved	DMSO	10000	GBABOYUKABKIAF-IELIFDKJSA-N	CHEMBL1200655,CHEMBL607994
Aminoglutethimide	Anti-steroid, aromatase inhibitor	CYP19A1	F.Hormone therapy	Approved	DMSO	10000	ROBVIMPUHSLWNV-UHFFFAOYSA-N	CHEMBL488
Vinblastine	Mitotic inhibitor, Vinca alkaloid microtubule depolymerizer	TUBA1A;TUBB;TUBD1;TUBG1;TUBE1	A.Conv.Chemo	Approved	DMSO	1000	JXLYSJRDGCGARV-XQKSVPLYSA-N	CHEMBL159,CHEMBL378544
Thalidomide	Immunosuppressant	CRBN;TNF;NFKB1;FGFR2;PTGS2	D.Immunomodulatory	Approved	DMSO	10000	UEJJHQNACJXSKW-UHFFFAOYSA-N	CHEMBL468
Clomifene	Selective estrogen receptor modulator	ESR1;SHBG	F.Hormone therapy	Approved	DMSO	10000	GKIRPKYJQBWNGO-OCEACIFDSA-N	CHEMBL1200667,CHEMBL954
Cytarabine	Antimetabolite, interferes with DNA synthesis	POLB;DNA	A.Conv.Chemo	Approved	DMSO	10000	UHDGCWIWMRVCDJ-CCXZUQQUSA-N	CHEMBL2092816,CHEMBL596186,CHEMBL803,CHEMBL1256472
Cytarabine.Idarubicin	Antimetabolite, interferes with DNA synthesis.Topoisomerase II inhibitor	TOP2A;TOP2B;DNA;POLB	N.Conv.Chemo Combo	Approved	NA	NA	NA	NA
Disulfiram(+CuCl2)	alcohol dehydrogenase inhibitor	ALDH1A1	H.Metabolic modifier	Approved (non-oncology)	DMSO	50000	AUZONCFQVSMFAP-UHFFFAOYSA-N	CHEMBL964
Finasteride	type II 5-alpha reductase inhibitor	SRD5A2	F.Hormone therapy	Approved	DMSO	10000	DBEPLOCGEIEOCV-WSBQPABSSA-N	CHEMBL710
Fluorouracil	Antimetabolite	TYMS	A.Conv.Chemo	Approved	DMSO	10000	GHASVSINZRGABV-UHFFFAOYSA-N	CHEMBL185
Flutamide	Nonsteroidal antiandrogen	AR;AHR;NR1I2	F.Hormone therapy	Approved	DMSO	10000	MKXKFYHWDHIYRV-UHFFFAOYSA-N	CHEMBL806
Imiquimod	Immunomodulatory agent, TLR7 agonist	TLR7;TLR8	D.Immunomodulatory	Approved	DMSO	2500	DOUYETYNHWVLEO-UHFFFAOYSA-N	CHEMBL1282
Methylprednisolone	Glucocorticoid, immunomodulatory agent	NR3C1;ANXA1	D.Immunomodulatory	Approved	DMSO	10000	VHRSUDSXCMQTMA-PJHHCJLFSA-N	CHEMBL1201081,CHEMBL278063,CHEMBL650,CHEMBL1201265,CHEMBL1206473,CHEMBL1200844
Mitoxantrone	Topoisomerase II inhibitor	TOP2A;TOP2B	A.Conv.Chemo	Approved	DMSO	1000	KKZJGLLVHKMTCM-UHFFFAOYSA-N	CHEMBL1200827,CHEMBL58,CHEMBL1417019
Paclitaxel	Mitotic inhibitor, taxane microtubule stabilizer	TUBB1;BCL2;MAP2;MAP4;MAPT	A.Conv.Chemo	Approved	DMSO	1000	RCINICONZNJXQF-MZXODVADSA-N	CHEMBL428647,CHEMBL48,CHEMBL1429740
Prednisolone	Glucocorticoid, immunomodulatory agent	NR3C1	D.Immunomodulatory	Approved	DMSO	10000	OIGNJSKKLXVSLS-VWUMJDOOSA-N	CHEMBL131
Mepacrine	Unclear.PLA2 inhibitor.NF-kB inhibitor, p53 activator	PLA2G6;PLA2G4A;PLCL1	X.Other	Approved	AQ	50000	GPKJTRJOBQGKQK-UHFFFAOYSA-N	CHEMBL2105615,CHEMBL554190,CHEMBL7568,CHEMBL556980,CHEMBL546257
Topotecan	Topoisomerase I inhibitor.Camptothecin analog	TOP1	A.Conv.Chemo	Approved	DMSO	10000	UCFGDBYHRUNTLO-QHCPKHFHSA-N	CHEMBL1607,CHEMBL84
Temozolomide	Alkylating agent	DNA	A.Conv.Chemo	Approved	DMSO	100000	BPEGJWRSRHCHSN-UHFFFAOYSA-N	CHEMBL810
Fulvestrant	Estrogen receptor antagonist	ESR1	F.Hormone therapy	Approved	DMSO	1000	VWUXBMIQPBEWFH-WCCTWKNTSA-N	CHEMBL1358
Megestrol_acetate	Progestogen	PGR;AR;NR3C1;ESR1	F.Hormone therapy	Approved	DMSO	10000	RQZAXGRLVPAYTJ-GQFGMJRRSA-N	CHEMBL1201139
Tamoxifen	Estrogen receptor antagonist	ESR1;ESR2	F.Hormone therapy	Approved	DMSO	10000	NKANXQFJJICGDU-QPLCGJKRSA-N	CHEMBL786,CHEMBL83
Methotrexate	Antimetabolite; Anti-folate agent	DHFR;TYMS	H.Metabolic modifier	Approved	DMSO	5000	FBOZXECLQNJBKD-ZDUSSCGKSA-N	CHEMBL34259,CHEMBL426,CHEMBL1376974,CHEMBL2096644
Nilutamide	Nonsteroidal antiandrogen	AR	F.Hormone therapy	Approved	DMSO	10000	XWXYUMMDTVBTOU-UHFFFAOYSA-N	CHEMBL1274
Mitotane	Antineoplastic agent	CYP11B1;	A.Conv.Chemo	Approved	DMSO	10000	JWBOIMRXGHLCPP-CYBMUJFWSA-N	CHEMBL1670
Allopurinol	Xanthine oxidase inhibitor	XDH	A.Conv.Chemo	Approved	DMSO	10000	OFCNXPDARWKPPY-UHFFFAOYSA-N	CHEMBL1467,CHEMBL1200477
Deferoxamine	Iron chelator	APP	X.Other	Approved (non-oncology)	AQ	10000	UBQYURCVBFRUQT-UHFFFAOYSA-N	CHEMBL556,CHEMBL2002581,CHEMBL1234
Digoxin	Cardiac glycoside	ATP1A1;ITGB1;ITGB3;ITGA3;ITGA1	X.Other	Approved (non-oncology)	DMSO	1000	NA	NA
Hydroxyurea	Antineoplastic agent	RRM1	A.Conv.Chemo	Approved	DMSO	1000000	VSNHCAURESNICA-UHFFFAOYSA-N	CHEMBL467
Mercaptopurine	Antimetabolite	HPRT1;PPAT	A.Conv.Chemo	Approved	DMSO	10000	GLVAUDGFNGKCSF-UHFFFAOYSA-N	CHEMBL1200751,CHEMBL1425
Thioguanine	Antimetabolite; Purine analog	DNMT1	A.Conv.Chemo	Approved	DMSO	10000	WYWHKKSPHMUBEB-UHFFFAOYSA-N	CHEMBL727
Tacrolimus	binds FKBP12, causes inhibition of calcineurin	FKBP1A	C.Rapalog	Approved	DMSO	10000	QJJXYPPXXYFBGM-LFZNUXCKSA-N	CHEMBL269732
Epirubicin	Topoisomerase II inhibitor	TOP2A;TOP2B	A.Conv.Chemo	Approved	DMSO	1000	AOJJSUZBOXZQNB-VTZDEGQISA-N	CHEMBL417
Itraconazole	antifungal, hedgehog signaling inhibitor	CYP51A1;CYP3A4	X.Other	Approved (non-oncology)	DMSO	5000	VHVPQPYKVGDNFY-ZPGVKDDISA-N	CHEMBL22587
AT-101	Bcl-2 family inhibitor	BCL2;BCL2L1;MCL1	G.Apoptotic modulator	Investigational (Ph 2)	DMSO	100000	QBKSWRVVCFFDOT-UHFFFAOYSA-N	CHEMBL15972
BI-2536	PLK1 inhibitor	PLK1	B.Kinase inhibitor	Investigational (Ph 2)	DMSO	1000	XQVVPGYIWAGRNI-JOCHJYFZSA-N	CHEMBL513909
SN-38	Active metabolite of irinotecan.Topoisomerase I inhibitor	TOP1	A.Conv.Chemo	(Approved)	DMSO	10000	FJHBVJOVLFPMQE-QFIPXVFZSA-N	CHEMBL837
Pravastatin	HMG CoA reductase inhibitor	HMGCR	H.Metabolic modifier	Approved (non-oncology)	AQ	10000	TUZYXOIXSAXUGO-PZAWKZKUSA-M	CHEMBL1144,CHEMBL690
Exemestane	Aromatase inhibitor	CYP19A1	F.Hormone therapy	Approved	DMSO	10000	BFYIZQONLCFLEV-DAELLWKTSA-N	CHEMBL1200374
Raltitrexed	DHFR.GARFT.thymidylate synthase inhibitor	TYMS;DHFR	A.Conv.Chemo	Approved	DMSO	1000	IVTVGDXNLFLDRM-HNNXBMFYSA-N	CHEMBL225071
Palbociclib	CDK4, 6 inhibitor	CDK4;CDK6	B.Kinase inhibitor	Approved	AQ	10000	AHJRHEGDXFFMBM-UHFFFAOYSA-N	CHEMBL189963,CHEMBL2364621
AT9283	Aurora A & B, Jak2, Flt, ABL inhibitor	AURKA;AURKB;JAK2;JAK3;ABL1;ABL2;FGFR2;GSK3B;MERTK;FLT4;FLT1;RPS6KA3;RPS6KA2;RET;TYK2;YES1;FGFR1;PDGFRA;FLT1;STK17A;RPS6KA6;FLT3;KDR;SRC	B.Kinase inhibitor	Investigational (Ph 2)	DMSO	1000	LOLPPWBBNUVNQZ-UHFFFAOYSA-N	CHEMBL495727,CHEMBL496311
Navitoclax	Bcl-2.Bcl-xL inhibitor	BCL2;BCL2L2;BAD;BCL2L1;MCL1	G.Apoptotic modulator	Investigational (Ph 2)	DMSO	10000	JLYAXFNOILIKPP-KXQOOQHDSA-N	CHEMBL1269095,CHEMBL443684,CHEMBL2105690
Selumetinib	MEK1.2 inhibitor	MAP2K1	B.Kinase inhibitor	Investigational (Ph 3)	DMSO	10000	CYOHGALHFOKKQC-UHFFFAOYSA-N	CHEMBL1614701,CHEMBL2105684
Veliparib	PARP inhibitor	PARP1	E.Differentiating.epigenetic modifier	Investigational (Ph 3)	DMSO	10000	JNAHVYVRKWKWKQ-UHFFFAOYSA-N	CHEMBL506871
Afatinib	EGFR inhibitor	EGFR;ERBB2;ERBB4	B.Kinase inhibitor	Approved	DMSO	1000	ULXXDDBFHOBEHA-CWDCEQMOSA-N	CHEMBL1173655,CHEMBL2105712
Dovitinib	FGFR inhibitor	FGFR1;FGFR3;KIT;FLT3;FLT4	B.Kinase inhibitor	Investigational (Ph 3)	DMSO	10000	PIQCTGMSNWUMAF-UHFFFAOYSA-N	CHEMBL522892,CHEMBL2103806
Crizotinib	ALK, c-Met inhibitor	ALK;MET	B.Kinase inhibitor	Approved	DMSO	1000	KTEIFNKAUNYNJU-GFCCVEGCSA-N	CHEMBL601719
Danusertib	Aurora, Ret, TrkA, FGFR-1 inhibitor	AURKA;AURKB;RET;FGFR1;ABL1;NTRK1	B.Kinase inhibitor	Investigational (Ph 2)	DMSO	10000	XKFTZKGMDDZMJI-HSZRJFAPSA-N	CHEMBL402548,CHEMBL534499
Foretinib	MET, VEGFR2 inhibitor	MET;KDR	B.Kinase inhibitor	Investigational (Ph 2)	DMSO	1000	CXQHYVUVSFXTMY-UHFFFAOYSA-N	CHEMBL1230609
Abiraterone	P450 17alpha-hydroxylase-17,20-lyase inhibitor	CYP17A1	F.Hormone therapy	Approved	DMSO	5000	GZOSMCIZMLWJML-VJLLXTKPSA-N	CHEMBL254328
SNS-032	CDK inhibitor	CDK2;CDK7;CDK9;GSK3A	B.Kinase inhibitor	Investigational (Ph 2)	DMSO	10000	OUSFTKFNBAZUKL-UHFFFAOYSA-N	CHEMBL296468
ABT-751	Mitotic inhibitor, Colchicine site binding microtubule depolymerizer	TUBB	A.Conv.Chemo	Investigational (Ph 2)	DMSO	10000	URCVCIZFVQDVPM-UHFFFAOYSA-N	CHEMBL1830238,CHEMBL20684
BIIB021	HSP90 inhibitor	HSP90AA1	K.HSP inhibitor	Investigational (Ph 2)	DMSO	10000	QULDDKSCVCJTPV-UHFFFAOYSA-N	CHEMBL467399,CHEMBL557165
Decitabine	Nucleoside analog DNA methyl transferase inhibitor	TYMS	E.Differentiating.epigenetic modifier	Approved	DMSO	10000	XAUDJQYHKZQPEU-KVQBGUIXSA-N	CHEMBL1201129
Alvocidib	CDK inhibitor	CDK9;CDK1;CDK2;CDK4;CDK6;CDK7	B.Kinase inhibitor	Investigational (Ph 2)	DMSO	10000	BIIVYFLTOXDAOV-YVEFUNNKSA-N	CHEMBL428690,CHEMBL2105698
Tipifarnib	Farnesyltransferase inhibitor	FNTA	E.Differentiating.epigenetic modifier	Investigational (Ph 3)	DMSO	10000	PLHJCIYEEKOWNM-HHHXNRCGSA-N	CHEMBL289228
Ponatinib	Broad TK inhibitor	ABL1;PDGFRA;KDR;FGFR1;SRC;KIT	B.Kinase inhibitor	Approved	DMSO	1000	PHXJVRSECIGDHY-UHFFFAOYSA-N	CHEMBL1171837,CHEMBL2105708
Perifosine	AKT.PI3K inhibitor	PIK3CA;PIK3CB;PIK3CD;PIK3CG;AKT1;AKT2;AKT3	B.Kinase inhibitor	Investigational (Ph 3)	AQ	2500	SZFPYBIJACMNJV-UHFFFAOYSA-N	CHEMBL372764
Motesanib	VEGFR, PDGFR, Ret, Kit inhibitor	KDR;FLT1;FLT4;KIT;PDGFRA;PDGFRB;RET	B.Kinase inhibitor	Investigational (Ph 2)	DMSO	10000	RAHBGWKEPAQNFF-UHFFFAOYSA-N	CHEMBL572881,CHEMBL2107357
Cediranib	KDR.Flt.VEGFR inhibitor	KDR;FLT1;FLT4;KIT;PDGFRA;PDGFRB;FGFR1;FGFR2	B.Kinase inhibitor	Investigational (Ph 3)	DMSO	1000	XXJWYDDUDKYVKI-UHFFFAOYSA-N	CHEMBL491473,CHEMBL2103798
Rucaparib	PARP inhibitor	PARP1	E.Differentiating.epigenetic modifier	Approved (US)	DMSO	10000	HMABYWSNWIZPAG-UHFFFAOYSA-N	CHEMBL1173055,CHEMBL2105733
Tarenflurbil	Gamma-secretase inhibitor	APP;PSEN1;NCSTN;APH1A;APH1B;PSENEN;APH1B;APH1A	X.Other	Investigational (Ph 3)	DMSO	10000	SYTBZMRGLBWNTM-SNVBAGLBSA-N	CHEMBL190083
Tivozanib	VEGFR1, 2, 3, c-Kit, PDGFRB inhibitor	KDR;FLT1;FLT4;KIT;PDGFRA;PDGFRB;EPHB2;TEK	B.Kinase inhibitor	Investigational (Ph 3)	DMSO	10000	SPMVMDHWKHCIDT-UHFFFAOYSA-N	CHEMBL1289494,CHEMBL2105756
AZD1775	Wee1 inhibitor	WEE1	B.Kinase inhibitor	Investigational (Ph 2)	DMSO	10000	BKWJAKQVGHWELA-UHFFFAOYSA-N	CHEMBL1976040
PF-00477736	CHEK1 inhibitor	CHEK1;KDR;FLT3;YES1;CHEK2	B.Kinase inhibitor	Investigational (Ph 1)	DMSO	10000	NDEXUOWTGYUVGA-LJQANCHMSA-N	CHEMBL2139474
AZD7762	CHEK1 inhibitor	CHEK1;CHEK2	B.Kinase inhibitor	Investigational (Ph 1)	DMSO	1000	IAYGCINLNONXHY-LBPRGKRZSA-N	CHEMBL2041933
AZD1152-HQPA	Aurora B inhibitor	AURKB	B.Kinase inhibitor	Investigational (Ph 3)	DMSO	1000	QYZOGCMHVIGURT-UHFFFAOYSA-N	CHEMBL215152
AZD8055	mTOR inhibitor	MTOR	B.Kinase inhibitor	Investigational (Ph 1)	DMSO	10000	KVLFRAWTRWDEDF-IRXDYDNUSA-N	CHEMBL1801204
Belinostat	HDAC inhibitor	HDAC1;HDAC2;HDAC3	E.Differentiating.epigenetic modifier	Approved (US)	DMSO	10000	NCNRHFGMJRPRSK-MDZDMXLPSA-N	CHEMBL408513
Bimatoprost	Prostaglandin analog	PTGFR;PTGER1;PTGER3	D.Immunomodulatory	Approved	DMSO	5500	AQOKCDNYWBIDND-FTOWTWDKSA-N	CHEMBL1200963
Doramapimod	p38MAPK inhibitor	MAPK14	B.Kinase inhibitor	Investigational (Ph 1)	DMSO	10000	MVCOAUNKQVWQHZ-UHFFFAOYSA-N	CHEMBL103667
Bryostatin_1	PKC activator	PRKCE;PRKCA;PRKCE;PRKD1;CASP8	B.Kinase inhibitor	Investigational (Ph 1)	DMSO	100	MJQUEDHRCUIRLF-TVIXENOKSA-N	CHEMBL449158
Tacedinaline	HDAC inhibitor	HDAC1;HDAC2;HDAC3;HDAC8	E.Differentiating.epigenetic modifier	Investigational (Ph 3)	DMSO	1000	VAZAPHZUAVEOMC-UHFFFAOYSA-N	CHEMBL235191
BMS-754807	IGF1R inhibitor	IGF1R	B.Kinase inhibitor	Investigational (Ph 2)	DMSO	10000	LQVXSNNAFNGRAH-QHCPKHFHSA-N	CHEMBL575448
Idelalisib	PI3K inhibitor, p110?-selective	PIK3CD	B.Kinase inhibitor	Approved	DMSO	10000	IFSDAJWBUCMOAH-HNNXBMFYSA-N	CHEMBL2216870
Trametinib	MEK1.2 inhibitor	MAP2K1	B.Kinase inhibitor	Approved	DMSO	250	LIRYPHYGHXZJBZ-UHFFFAOYSA-N	CHEMBL2103875,CHEMBL2105741
Sonidegib	Smothened (Hh) inhibitor	SMO	M.Hedgehog inhibitor	Approved	DMSO	10000	RWIVSVMMGFFZIJ-VWDRLOGHSA-N	CHEMBL2105737
Everolimus	binds FKBP12, causes inhibition of mTORC1	FKBP1A	C.Rapalog	Approved	DMSO	100	HKVAMNSJSFKALM-GKUWKFKPSA-N	CHEMBL1908360
Ruxolitinib	JAK1 & 2 inhibitor	JAK1;JAK2	B.Kinase inhibitor	Approved	DMSO	10000	HFNKQEVNSGCOJV-HNNXBMFYSA-N	CHEMBL1789941,CHEMBL1795071
Indibulin	Mitoric inhibitor, Microtubule depolymerizer	TUBB	A.Conv.Chemo	Investigational (Ph 2)	DMSO	10000	SOLIIYNRSAWTSQ-UHFFFAOYSA-N	CHEMBL49642
MK-2206	AKT inhibitor	AKT1;AKT2;AKT3	B.Kinase inhibitor	Investigational (Ph 2)	DMSO	1000	HWUHTJIKQZZBRA-UHFFFAOYSA-N	CHEMBL1079175
Alisertib	Aurora A inhibitor	AURKA	B.Kinase inhibitor	Investigational (Ph 3)	DMSO	10000	ZLHFILGSQDJULK-UHFFFAOYSA-N	CHEMBL483158,CHEMBL2103871
Nelarabine	Nucleoside analog, DNA, RNA synth inhibitor	DNA	A.Conv.Chemo	Approved	DMSO	10000	IXOXBSCIXZEQEQ-UHTZMRCNSA-N	CHEMBL1201112
Nilotinib	ABL inhibitor	ABL1;KIT	B.Kinase inhibitor	Approved	DMSO	10000	HHZIURLSWUIHRB-UHFFFAOYSA-N	CHEMBL255863,CHEMBL1201740
Luminespib	HSP90 inhibitor	HSP90AA1	K.HSP inhibitor	Investigational (Ph 2)	DMSO	1000	NDAZATDQFDPQBD-UHFFFAOYSA-N	CHEMBL252164
Plerixafor	CXCR4 antagonist	CXCR4	X.Other	Approved	AQ	10000	YIQPUIGJQJDJOS-UHFFFAOYSA-N	CHEMBL18442,CHEMBL2088494,CHEMBL2311028,CHEMBL2311089,CHEMBL1788331,CHEMBL1788331,CHEMBL1788331
Vemurafenib	BRAF(V600E) inhibitor	BRAF;SRMS;TNK2;MAP4K5;RAF1;FGR	B.Kinase inhibitor	Approved	DMSO	10000	GPXBXXGIAQBQNI-UHFFFAOYSA-N	CHEMBL1229517
Vandetanib	VEGFR, EGFR, RET inhibitor	KDR;FLT4;EGFR;RET	B.Kinase inhibitor	Approved	DMSO	1000	UHTHHESEBZOYNR-UHFFFAOYSA-N	CHEMBL24828,CHEMBL533849
Sepantronium_bromide	Survivin inhibitor	BIRC5	G.Apoptotic modulator	Investigational (Ph 2)	DMSO	10000	QBIYUDDJPRGKNJ-UHFFFAOYSA-M	CHEMBL2105734,CHEMBL2110734
Linsitinib	IGF1R, IR inhibitor	IGF1R	B.Kinase inhibitor	Investigational (Ph 2)	DMSO	10000	PKCDDUHJAFVJJB-VLZXCDOPSA-N	CHEMBL1091644
Tepotinib	c-Met inhibitor	MET	B.Kinase inhibitor	Investigational (Ph 1)	DMSO	1000	AHYMHWXQRWRBKT-UHFFFAOYSA-N	not in ChEMBL
Dasatinib	ABL, Src, Kit, EphR...Inhibitor	ABL1;SRC;KIT;EPHA2;LCK;YES1;PDGFRB;FYN;ABL2;BTK	B.Kinase inhibitor	Approved	DMSO	1000	ZBNZXTGUTAYRHI-UHFFFAOYSA-N	CHEMBL1421
Tofacitinib	JAK3, JAK2(V617F) inhibitor	JAK1;JAK2;JAK3	B.Kinase inhibitor	Approved	DMSO	5000	UJLAWZDWDVHWOW-YPMHNXCESA-N	CHEMBL221959,CHEMBL2103743
Fingolimod	S1PR antagonist	S1PR1	X.Other	Approved	DMSO	10000	KKGQTZUTZRNORY-UHFFFAOYSA-N	CHEMBL314854,CHEMBL544665
Axitinib	VEGFR, PDGFR, KIT inhibitor	KDR;FLT1;FLT4;KIT;PDGFRA;PDGFRB	B.Kinase inhibitor	Approved	DMSO	10000	RITAVMQDGBJQJZ-FMIVXFBMSA-N	CHEMBL1289926
Saracatinib	Src, ABL inhibitor	ABL1;SRC;LCK;YES1;LYN;FYN;BLK;EGFR;KIT;EPHA2	B.Kinase inhibitor	Investigational (Ph 3)	DMSO	10000	OUKYUETWWIPKQR-UHFFFAOYSA-N	CHEMBL217092,CHEMBL2105677
Bosutinib	ABL, Src inhibitor	ABL1;LYN;HCK;SRC;EPHB2;NTRK1;NTRK2;TXK	B.Kinase inhibitor	Approved	DMSO	10000	UBPYILGKFZZVDX-UHFFFAOYSA-N	CHEMBL288441
Canertinib	Pan-HER inhibitor	EGFR;ERBB2	B.Kinase inhibitor	Investigational (Ph 3)	DMSO	10000	OMZCMEYTWSXEPZ-UHFFFAOYSA-N	CHEMBL31965,CHEMBL545315
Lenalidomide	Immunomodulatory	CRBN;TNFSF11;CDH5;PTGS2;TNF	D.Immunomodulatory	Approved	DMSO	100000	GOTYRUGSSMKFNF-UHFFFAOYSA-N	CHEMBL848
Panobinostat	HDAC inhibitor	HDAC1;HDAC2;HDAC3	E.Differentiating.epigenetic modifier	Approved	DMSO	1000	FPOHNWQLNRZRFC-ZHACJKMWSA-N	CHEMBL483254
Pazopanib	VEGFR inhibitor	FLT1;KDR;FLT4;KIT;PDGFRA;PDGFRB;CSF1R;FGFR3;ITK	B.Kinase inhibitor	Approved	DMSO	10000	CUIHSIWYWATEQL-UHFFFAOYSA-N	CHEMBL477772,CHEMBL1201733
Tandutinib	FLT3, PDGFR, KIT inhibitor	FLT3	B.Kinase inhibitor	Investigational (Ph 2)	DMSO	1000	UXXQOJXBIDBUAC-UHFFFAOYSA-N	CHEMBL124660
Temsirolimus	binds FKBP12, causes inhibition of mTORC1	FKBP1A	C.Rapalog	Approved	DMSO	100	CBPNZQVSJQDFBE-FUXHJELOSA-N	CHEMBL1201182
Vorinostat	HDAC inhibitor	HDAC1;HDAC3	E.Differentiating.epigenetic modifier	Approved	DMSO	10000	WAEXFXRVDQXREF-UHFFFAOYSA-N	CHEMBL98
Entinostat	HDAC inhibitor	HDAC1;HDAC3	E.Differentiating.epigenetic modifier	Investigational (Ph 2)	DMSO	10000	INVTYAOGFAGBOE-UHFFFAOYSA-N	CHEMBL27759
Enzastaurin	PKCbeta inhibitor	PRKCB;PRKCA;PRKCG;PRKCE	B.Kinase inhibitor	Investigational (Ph 3)	DMSO	10000	AXRCEOKUDYDWLF-UHFFFAOYSA-N	CHEMBL300138,CHEMBL2107337
Olaparib	PARP inhibitor	PARP1	E.Differentiating.epigenetic modifier	Approved	DMSO	10000	FDLYAMZZIXQODN-UHFFFAOYSA-N	CHEMBL521686
Masitinib	KIT inhibitor	KIT	B.Kinase inhibitor	Investigational (Ph 3)	DMSO	10000	WJEOLQLKVOPQFV-UHFFFAOYSA-N	CHEMBL1908391
Pictilisib	PI3K inhibitor, pan-class I	PIK3CA;PIK3CB;PIK3CG;PIK3CD;MTOR	B.Kinase inhibitor	Investigational (Ph 2)	DMSO	10000	LHNIIDJUOCFXAP-UHFFFAOYSA-N	CHEMBL521851,CHEMBL1922096
Vismodegib	Smothened (Hh) inhibitor	SMO	M.Hedgehog inhibitor	Approved	DMSO	10000	BPQMGSKTAYIVFO-UHFFFAOYSA-N	CHEMBL473417
Sorafenib	BRAF, FGFR-1, VEGFR-2 & -3, PDGFR-beta, KIT, and FLT3 inhib	BRAF;FGFR1;KDR;FLT3;KIT;FLT4;PDGFRB	B.Kinase inhibitor	Approved	DMSO	1000	MLDQJTXFUGDVEO-UHFFFAOYSA-N	CHEMBL1336,CHEMBL1760433,CHEMBL1200485
Seliciclib	CDK2, 7, 9 inhibitor	CDK2;CDK1;CDK5;MAPK1;MAPK3	B.Kinase inhibitor	Investigational (Ph 2)	DMSO	10000	BTIHMVBBUGXLCJ-OAHLLOKOSA-N	CHEMBL14762
Docetaxel	Mitotic inhibitor, taxane microtubule stabilizer	TUBB1;MAP2;MAP4;MAPT	A.Conv.Chemo	Approved	DMSO	1000	ZDZOTLJHXYCWBA-JXHJHTFNSA-N	CHEMBL92
Pentostatin	Antimetabolite; Purine analog	ADA	A.Conv.Chemo	Approved	DMSO	10000	FPVKHBSQESCIEP-JQCXWYLXSA-N	CHEMBL1580
Sirolimus	binds FKBP12, causes inhibition of mTORC1	FKBP1A	C.Rapalog	Approved	DMSO	100	QFJCIRLUMZQUOT-HPLJOQBZSA-N	CHEMBL413
Floxuridine	Antimetabolite; Analog of 5-fluorouracil	TYMS	A.Conv.Chemo	Approved	DMSO	10000	ODKNJVUHOIMIIZ-RRKCRQDMSA-N	CHEMBL917
Gemcitabine	Antimetabolite; Nucleoside analog	TYMS	A.Conv.Chemo	Approved	DMSO	1000	SDUQYLNIPVEERB-QPPQHZFASA-O	CHEMBL888,CHEMBL1637
Teniposide	Topoisomerase II inhibitor	TOP2A	A.Conv.Chemo	Approved	DMSO	10000	NRUKOCRGYNPUPR-PSZSYXFXSA-N	CHEMBL1237078
Dactinomycin	RNA and DNA synthesis inhibitor	DNA	A.Conv.Chemo	Approved	DMSO	1000	RJURFGZVJUQBHK-IIXSONLDSA-N	CHEMBL1554
Cladribine	Antimetabolite; Purine analog	RRM1;RRM2;RRM2B	A.Conv.Chemo	Approved	DMSO	1000	PTOAARAWEBMLNO-SRQIZXRXSA-N	CHEMBL1619
Mitomycin_C	Antineoplastic anatibiotic; DNA crosslinker	DNA	A.Conv.Chemo	Approved	DMSO	10000	NWIBSHFKIJFRCO-JZQLQECVSA-N	CHEMBL105
Carboplatin	Platinum-based antineoplastic agent	DNA	A.Conv.Chemo	Approved	AQ	100000	CCQPAEQGAVNNIA-UHFFFAOYSA-N	CHEMBL1351,CHEMBL288376
Cisplatin	Platinum-based antineoplastic agent	DNA	A.Conv.Chemo	Approved	AQ	100000	DLBNRDWREIUHLD-UHFFFAOYSA-L	CHEMBL11359,CHEMBL1386,CHEMBL2068237
Pemetrexed	Dihydrofolate reductase inhibitor	TYMS;DHFR	H.Metabolic modifier	Approved	AQ	10000	WBXPDJSOTKVWSJ-CYBMUJFWSA-N	CHEMBL1200373,CHEMBL1201258,CHEMBL225072,CHEMBL2360464
Oxaliplatin	Platinum-based antineoplastic agent	DNA	A.Conv.Chemo	Approved	AQ	100000	ZROHGHOFXNOHSO-BNTLRKBRSA-L	CHEMBL414804
Daunorubicin	Topoisomerase II inhibitor	TOP2A;TOP2B	A.Conv.Chemo	Approved	DMSO	1000	STQGQHZAVUOBTE-VGBVRHCVSA-N	CHEMBL1563,CHEMBL178,CHEMBL434442,CHEMBL1200475
Etoposide	Topoisomerase II inhibitor	TOP2A;TOP2B	A.Conv.Chemo	Approved	DMSO	10000	VJJPUSNTGOMMGY-MRVIYFEKSA-N	CHEMBL44657
Arsenic(III)_oxide	Thioredoxin reductase inhibitor; cytotoxic chemotherapeutic	TXNRD1;IKBKB;JUN;CCND1;MAPK3;MAPK1	E.Differentiating.epigenetic modifier	Approved	AQ	2500	GOLCXWYRSKYTSP-UHFFFAOYSA-N	CHEMBL1200978
Doxorubicin	Topoisomerase II inhibitor	TOP2A;NOLC1	A.Conv.Chemo	Approved	DMSO	1000	AOJJSUZBOXZQNB-TZSSRYMLSA-N	CHEMBL53463,CHEMBL272706,CHEMBL359744,CHEMBL216371
Valrubicin	Topoisomerase II inhibitor	TOP2A;TOP2B	A.Conv.Chemo	Approved	DMSO	5000	ZOCKGBMQLCSHFP-KQRAQHLDSA-N	CHEMBL1096885
Sunitinib	Broad TK inhibitor	FLT3;KIT;KDR;PDGFRB;FLT1;FLT4;CSF1R;PDGFRA	B.Kinase inhibitor	Approved	DMSO	1000	WINHZLLDWRZWRT-ATVHPVEESA-N	CHEMBL535,CHEMBL1567
Ixabepilone	Mitotic inhibitor, Epothilone microtubule stabilizer.	TUBB3	A.Conv.Chemo	Approved	DMSO	1000	FABUFPQFXZVHFB-PVYNADRNSA-N	CHEMBL1201752
Azacitidine	Nucleoside analog DNA methyl transferase inhibitor	TYMS	E.Differentiating.epigenetic modifier	Approved	DMSO	10000	NMUSYJAQQFHJEW-KVTDHHQDSA-N	CHEMBL1489
Fludarabine	Antimetabolite; Purine analog	RRM1	A.Conv.Chemo	Approved	DMSO	10000	HBUBKKRHXORPQB-FJFJXFQQSA-N	CHEMBL1096882,CHEMBL1568
Bleomycin	Glycopeptide antibiotic; causes DNA breaks	DNA	A.Conv.Chemo	Approved	DMSO	10000	OYVAGSVQBOHSSS-UAPAGMARSA-O	CHEMBL403664,CHEMBL501630,CHEMBL525960
Dactolisib	PI3K.mTOR inhibitor	PIK3CA;PIK3CB;PIK3CD;PIK3CG;MTOR;ATR;RPS6KB1	B.Kinase inhibitor	Investigational (Ph 2)	DMSO	1000	JOGKUKXHTYWRGZ-UHFFFAOYSA-N	CHEMBL1879463,CHEMBL1911126
Quizartinib	FLT3 inhibitor	FLT3	B.Kinase inhibitor	Investigational (Ph 3)	DMSO	1000	CVWXJKQAOSCOAB-UHFFFAOYSA-N	CHEMBL576982,CHEMBL2105709
APR-246	p53 activator, thioredoxin reductase 1 inhibitor	TP53	G.Apoptotic modulator	Investigational (Ph 1)	DMSO	10000	BGBNULCRKBVAKL-UHFFFAOYSA-N	CHEMBL3186011
Carfilzomib	Proteasome inhibitor (20S subunit)	PSMB5;PSMB8;PSMB1;PSMB2;PSMB9;PSMB10	L.Protease.proteasome inhibitor	Approved	DMSO	1000	BLMPQMFVWMYDKT-NZTKNTHTSA-N	CHEMBL451887
Gandotinib	JAK2 inhibitor	JAK2;JAK1;FLT3;FLT4;FGFR2;TYK2;NTRK2;FGFR3;KDR;ALK	B.Kinase inhibitor	Investigational (Ph 2)	DMSO	10000	SQSZANZGUXWJEA-UHFFFAOYSA-N	CHEMBL2107823
AZ3146	Mps1 kinase (TTK) inhibitor	TTK	B.Kinase inhibitor	Probe	DMSO	10000	YUKWVHPTFRQHMF-UHFFFAOYSA-N	CHEMBL2140523
Sotrastaurin	PKC inhibitor	PRKCB;PRKCQ;PRKCH;PRKCA;PRKCE;PRKCA	B.Kinase inhibitor	Investigational (Ph 2)	DMSO	10000	OAVGBZOFDPFGPJ-UHFFFAOYSA-N	CHEMBL565612,CHEMBL2105655
Midostaurin	Broad TK (FLT3, KIT, RET, JAK, EGFR...) inhibitor	PRKCA;PRKCB;PRKCG;FLT3;KIT;RET;EGFR;JAK1;KDR	B.Kinase inhibitor	Approved (US)	DMSO	10000	BMGQWWVMWDBQGC-IIFHNQTCSA-N	CHEMBL2309609,CHEMBL608533
Regorafenib	BRAF, c-Kit, VEGFR2 inhibitor	BRAF;RAF1;KIT;KDR;FLT1;RET;PDGFRB;FLT4	B.Kinase inhibitor	Approved	DMSO	10000	FNHKPVJBJVTLMP-UHFFFAOYSA-N	CHEMBL1946170
XAV939	Tankyrase-1 and -2	TNKS	E.Differentiating.epigenetic modifier	Probe	DMSO	10000	KLGQSVMIPOVQAX-UHFFFAOYSA-N	CHEMBL1086580
UCN-01	PKCbeta, PDK1, Chk, Cdk2 inhibitor	PRKCB;PDPK1	B.Kinase inhibitor	Investigational (Ph 2)	DMSO	10000	PBCZSGKMGDDXIJ-HQCWYSJUSA-N	CHEMBL574737
Ruboxistaurin	PKCbeta inhibitor	PRKCB;PRKCH	B.Kinase inhibitor	Investigational (Ph 3)	DMSO	10000	ZCBUQCWBWNUWSU-UHFFFAOYSA-N	CHEMBL91829,CHEMBL432130
Capecitabine	5-FU prodrug	TYMS	A.Conv.Chemo	Approved	DMSO	10000	GAGWJHPBXLXJQN-UORFTKCHSA-N	CHEMBL1773
Chloroquine	Antimalaria agent; chemo.radio sensitizer	TLR7;TLR9;HMGB1;GSTA2;GSTM1;TNF	A.Conv.Chemo	Approved	AQ	100000	QKICWELGRMTQCR-UHFFFAOYSA-N	CHEMBL1326,CHEMBL1669,CHEMBL2052012,CHEMBL250447,CHEMBL76,CHEMBL2095223,CHEMBL58510
Valproic_acid	HDAC inhibitor	HDAC2;HDAC9	E.Differentiating.epigenetic modifier	Approved	AQ	1000000	AEQFSUDEHCCHBT-UHFFFAOYSA-M	CHEMBL109,CHEMBL433,CHEMBL2105613,CHEMBL2315212
Tivantinib	MET inhibitor	MET	B.Kinase inhibitor	Investigational (Ph 2)	DMSO	1000	UCEQXRCJXIVODC-PMACEKPBSA-N	CHEMBL2103882
Niraparib	PARP inhibitor	PARP1	E.Differentiating.epigenetic modifier	Approved (US)	DMSO	10000	PCHKPVIQAHNQLW-UHFFFAOYSA-N	CHEMBL1094636
Volasertib	PLK1 inhibitor	PLK1	B.Kinase inhibitor	Investigational (Ph 3)	DMSO	1000	SXNJFOWDRLKDSF-STROYTFGSA-N	CHEMBL1233528,CHEMBL2105742
Toremifene	Selective estrogen receptor modulator	ESR1;SHBG	F.Hormone therapy	Approved	DMSO	10000	IWEQQRMGNVVKQW-OQKDUQJOSA-N	CHEMBL1200675,CHEMBL1655
Lasofoxifene	Selective estrogen receptor modulator	ESR1;ESR2;CNR2	F.Hormone therapy	Approved	DMSO	1000	GXESHMAMLJKROZ-IAPPQJPRSA-N	CHEMBL328190,CHEMBL2113354
Galiellalactone	STAT3-DNA interaction inhibitor	STAT3	X.Other	Probe	DMSO	25000	SOIISBQQYAGDKM-VFYMIVFZSA-N	CHEMBL1993987
Omacetaxine	Protein synthesis inhib (80 S ribosome)	RPL3	A.Conv.Chemo	Approved	DMSO	10000	HYFHYPWGAURHIV-JFIAXGOJSA-N	CHEMBL46286
NVP-RAF265	C-Raf inhibitor, unclear MoA	RAF1;BRAF;KDR	B.Kinase inhibitor	Investigational (Ph 2)	DMSO	1000	YABJJWZLRMPFSI-UHFFFAOYSA-N	CHEMBL558752
Neratinib	HER2, EGFR inhibitor	EGFR;ERBB2;KDR;SRC	B.Kinase inhibitor	Approved (US)	DMSO	1000	JWNPDZNEKVCWMY-VQHVLOKHSA-N	CHEMBL180022
Mocetinostat	HDAC inhibitor (HDAC1 & 2-selective)	HDAC1;HDAC2;HDAC3;HDAC11	E.Differentiating.epigenetic modifier	Investigational (Ph 2)	DMSO	10000	HRNLUBSXIHFDHP-UHFFFAOYSA-N	CHEMBL272980,CHEMBL481122
Rabusertib	CHEK1 inhibitor	CHEK1	B.Kinase inhibitor	Investigational (Ph 2)	DMSO	1000	SYYBDNPGDKKJDU-ZDUSSCGKSA-N	CHEMBL3039517
Galunisertib	TGF-B.Smad inhibitor	TGFB1	B.Kinase inhibitor	Investigational (Ph 2)	DMSO	1000	IVRXNBXKWIJUQB-UHFFFAOYSA-N	CHEMBL2364611
Linifanib	VEGFR, PDGFR, CSF-1R, FLT3 inhibitor	KDR;FLT1;FLT3;KIT;FLT4;PDGFRB;TEK;CSF1R	B.Kinase inhibitor	Investigational (Ph 3)	DMSO	1000	MPVGZUGXCQEXTM-UHFFFAOYSA-N	CHEMBL223360
Brivanib	VEGFR inhibitor	FLT1;KDR;FGFR1	B.Kinase inhibitor	Investigational (Ph 3)	DMSO	1000	WCWUXEGQKLTGDX-LLVKDONJSA-N	CHEMBL377300
Buparlisib	PI3K inhibitor, pan-class I	PIK3CA;PIK3CB;PIK3CG;PIK3CD;MTOR;PIK3C3	B.Kinase inhibitor	Investigational (Ph 2)	DMSO	10000	CWHUFRVAEUJCEF-UHFFFAOYSA-N	CHEMBL2017974,CHEMBL2364604
Nintedanib	VEGFR, PDGFR, FGFR inhibitor	FGFR1;FGFR2;FLT1;FLT4;KDR;PDGFRA;PDGFRB	B.Kinase inhibitor	Approved	DMSO	10000	XZXHXSATPCNXJR-ZIADKAODSA-N	CHEMBL502835
AZD4547	FGFR inhibitor	FGFR1;FGFR2;FGFR3;KDR	B.Kinase inhibitor	Investigational (Ph 2)	DMSO	1000	VRQMAABPASPXMW-HDICACEKSA-N	not in ChEMBL
VER-155008	HSP70 inhibitor	HSPA1A;HSPA1B;HSPA8;HSPA5	K.HSP inhibitor	Probe	DMSO	10000	ZXGGCBQORXDVTE-UMCMBGNQSA-N	CHEMBL470334
Daporinad	NAMPT inhibitor	NAMPT	H.Metabolic modifier	Investigational (Ph 2)	DMSO	1000	KPBNHDGDUADAGP-VAWYXSNFSA-N	CHEMBL566757
Cabozantinib	VEGFR2, Met, FLT3, Tie2, Kit and Ret inhibitor	KDR;MET;FLT3;KIT;RET;TEK	B.Kinase inhibitor	Approved	DMSO	1000	ONIQOQHATWINJY-UHFFFAOYSA-N	CHEMBL2105717,CHEMBL2103868
AZD1480	JAK1 & 2, FGFR inhibitor	JAK1;JAK2;FGFR1;FGFR2;RET	B.Kinase inhibitor	Investigational (Ph 1)	DMSO	1000	PDOQBOJDRPLBQU-UHFFFAOYSA-N	CHEMBL1231124
Ridaforolimus	binds FKBP12, causes inhibition of mTORC1	FKBP1A	C.Rapalog	Investigational (Ph 3)	DMSO	100	BUROJSBIWGDYCN-GAUTUEMISA-N	CHEMBL2103839
Sonolisib	PI3K inhibitor, pan-class I.Irreversible	PIK3CA;PIK3CB;PIK3CG;PIK3CD	B.Kinase inhibitor	Investigational (Ph 2)	DMSO	10000	QIUASFSNWYMDFS-NILGECQDSA-N	CHEMBL411907
Quisinostat	HDAC inhibitor	HDAC1;HDAC2;HDAC4;HDAC10;HDAC11	E.Differentiating.epigenetic modifier	Investigational (Ph 2)	DMSO	1000	PAWIYAYFNXQGAP-UHFFFAOYSA-N	CHEMBL2105763
Tosedostat	Aminopeptidase inhibitor	ANPEP	L.Protease.proteasome inhibitor	Investigational (Ph 3)	DMSO	10000	FWFGIHPGRQZWIW-SQNIBIBYSA-N	CHEMBL2103847
PF-04708671	p70S6K inhibitor	RPS6KB1	B.Kinase inhibitor	Probe	DMSO	10000	FBLPQCAQRNSVHB-UHFFFAOYSA-N	CHEMBL2134202
Binimetinib	MEK1.2 inhibitor	MAP2K1	B.Kinase inhibitor	Investigational (Ph 2)	DMSO	1000	ACWZRVQXLIRSDF-UHFFFAOYSA-N	CHEMBL3187723
Tamatinib	SYK inhibitor	SYK	B.Kinase inhibitor	Investigational (Ph 1)	DMSO	10000	NHHQJBCNYHBUSI-UHFFFAOYSA-N	CHEMBL475251
PF-3845	FAAH inhibitor	FAAH	X.Other	Probe	DMSO	10000	NBOJHRYUGLRASX-UHFFFAOYSA-N	CHEMBL1651524
MK-0752	Gamma-secretase.notch inhibitor	APP;PSEN1;NCSTN;APH1A;APH1B;PSENEN;APH1B;APH1A;NOTCH1;NOTCH2;NOTCH3	X.Other	Investigational (Ph 2)	DMSO	1000	XCGJIFAKUZNNOR-QCKZDCLWSA-N	CHEMBL2139979
SB743921	Mitotic inhibitor, Eg5.KSP inhibitor	KIF11	I.Kinesin inhibitor	Investigational (Ph 2)	DMSO	100	PGXYIBJJCLWJST-MUUNZHRXSA-N	CHEMBL2325429
Omipalisib	PI3K.mTOR inhibitor	PIK3CA;PIK3CB;PIK3CD;PIK3CG;MTOR	B.Kinase inhibitor	Investigational (Ph 1)	DMSO	1000	CGBJSGAELGCMKE-UHFFFAOYSA-N	CHEMBL1236962
Ibrutinib	BTK inhibitor	BTK;BLK;EGFR;FYN;LYN;LCK;BRAF;WNK1	B.Kinase inhibitor	Approved	DMSO	1000	XYFPWWZEPKGCCK-GOSISDBHSA-N	CHEMBL1873475
TAK-901	Aurora, Src family, JAK3, RTK inhibitor	AURKA;AURKB;JAK3;SRC;CLK2;FGR;LRRK2;YES1;LCK;FYN;ABL1;AXL;ABL2;HCK;RET;FRK;NTRK1;FGFR2	B.Kinase inhibitor	Investigational (Ph 1)	DMSO	1000	WKDACQVEJIVHMZ-UHFFFAOYSA-N	not in ChEMBL
Fostamatinib	SYK inhibitor	SYK	B.Kinase inhibitor	Investigational (Ph 2)	AQ	2500	GKDRMWXFWHEQQT-UHFFFAOYSA-L	CHEMBL2103830
JQ1	BET family inhibitor	BRD2;BRD3;BRD4	E.Differentiating.epigenetic modifier	Probe	DMSO	10000	DNVXATUJJDPFDM-KRWDZBQOSA-N	CHEMBL1957266
Infigratinib	FGFR inhibitor	FGFR1;FGFR2;FGFR3	B.Kinase inhibitor	Investigational (Ph 1)	DMSO	1000	QADPYRIHXKWUSV-UHFFFAOYSA-N	CHEMBL1852688,CHEMBL1834657
Momelotinib	JAK1 & 2 inhibitor	JAK1;JAK2	B.Kinase inhibitor	Investigational (Ph 2)	DMSO	10000	ZVHNDZWQTBEVRY-UHFFFAOYSA-N	CHEMBL1078178,CHEMBL2219411
Sapanisertib	mTOR inhibitor	PIK3CA;PIK3CB;PIK3CD;PIK3CG;MTOR	B.Kinase inhibitor	Investigational (Ph 1)	DMSO	1000	KMGZJEWJXAGHOP-UHFFFAOYSA-N	not in ChEMBL
TGX-221	PI3K beta selective inhibitor	PIK3CB	B.Kinase inhibitor	Probe	DMSO	10000	CPRAGQJXBLMUEL-UHFFFAOYSA-N	CHEMBL1972466
Tubacin	HDAC6 inhibitor	HDAC6	E.Differentiating.epigenetic modifier	Probe	DMSO	10000	BHUZLJOUHMBZQY-YXQOSMAKSA-N	CHEMBL356769
Tubastatin_A	HDAC6 inhibitor	HDAC6	E.Differentiating.epigenetic modifier	Probe	DMSO	10000	GOVYBPLHWIEHEJ-UHFFFAOYSA-N	CHEMBL2018302
Atorvastatin	HMG CoA reductase inhibitor	HMGCR	H.Metabolic modifier	Approved	DMSO	10000	XUKUURHRXDUEBC-KAYWLYCHSA-M	CHEMBL1487,CHEMBL393220
Varespladib	Secretory phospholipase A2 inhibitor	PLA2G2A;PLA2R1;PLA2G10;PLA2G3;PLA2G2D;PLA2G12A;PLA2G12B;PLA2G2E;PLA2G2F;PLA2G2C	X.Other	Investigational (Ph 2)	DMSO	10000	BHLXTPHDSZUFHR-UHFFFAOYSA-N	CHEMBL148674,CHEMBL2107809
StemRegenin_1	aryl hydrocarbon receptor (AHR) antagonist, stem cell regenerating	AHR	E.Differentiating.epigenetic modifier	Probe	DMSO	10000	BGFHMYJZJZLMHW-UHFFFAOYSA-N	not in ChEMBL
PFI-1	BET family inhibitor	BRD2;BRD3;BRD4	E.Differentiating.epigenetic modifier	Probe	DMSO	30000	TXZPMHLMPKIUGK-UHFFFAOYSA-N	CHEMBL2179387
4-hydroxytamoxifen	Selective estrogen receptor modulator	ESR1;ESR2;ESRRG;TFF1;ESRRA;NR1I2	F.Hormone therapy	Investigational as a gel preparation	DMSO	10000	DODQJNMQWMSYGS-QPLCGJKRSA-N	CHEMBL489
Enzalutamide	AR antagonist	AR	F.Hormone therapy	Approved	DMSO	10000	WXCXUHSOUPDCQV-UHFFFAOYSA-N	CHEMBL1082407
1-methyl-D-tryptophan	Indolamine 2,3-dioxygenase 1 and 2 inhibitor	IDO1	X.Other	Investigational (Ph 2)	AQ	5000	ZADWXFSZEAPBJS-SNVBAGLBSA-N	CHEMBL571209
Dacomitinib	Pan-HER inhibitor	EGFR;ERBB2;ERBB4	B.Kinase inhibitor	Investigational (Ph 3)	DMSO	1000	BSPLGGCPNTZPIH-IPZCTEOASA-N	CHEMBL2105719,CHEMBL2110732
Dinaciclib	CDK inhibitor	CDK1;CDK2;CDK5;CDK9	B.Kinase inhibitor	Investigational (Ph 3)	DMSO	1000	PIMQWRZWLQKKBJ-SFHVURJKSA-N	CHEMBL2103840
Dabrafenib	BRAF(V600E) inhibitor	BRAF;RAF1	B.Kinase inhibitor	Approved	DMSO	2500	BFSMGDJOXZAERB-UHFFFAOYSA-N	CHEMBL2028663,CHEMBL2105729
I-BET151	BET family inhibitor	BRD2;BRD3;BRD4	E.Differentiating.epigenetic modifier	Probe	DMSO	10000	VUVUVNZRUGEAHB-CYBMUJFWSA-N	CHEMBL2017291
Ralimetinib	p38MAPK inhibitor	MAPK14	B.Kinase inhibitor	Investigational (Ph 2)	DMSO	10000	NARMJPIBAXVUIE-UHFFFAOYSA-N	CHEMBL2364626,CHEMBL2364627
Crenolanib	PDGFRA and PDGFRB inhibitor	PDGFRA	B.Kinase inhibitor	Investigational (Ph 2)	DMSO	10000	DYNHJHQFHQTFTP-UHFFFAOYSA-N	CHEMBL2105728,CHEMBL2146086
PF-4800567	CK1epsilon inhibitor	CSNK1E	B.Kinase inhibitor	Probe	DMSO	10000	AUMDBEHGJRZSOO-UHFFFAOYSA-N	CHEMBL2069623
PF-670462	CK1epsilon and CK1delta inhibitor	CSNK1D;CSNK1E	B.Kinase inhibitor	Probe	DMSO	10000	WUDBUIUHVNECTM-UHFFFAOYSA-N	CHEMBL1951415
ZSTK474	PI3K gamma selective inhibitor	PIK3CG	B.Kinase inhibitor	Investigational (Ph 1)	DMSO	10000	HGVNLRPZOWWDKD-UHFFFAOYSA-N	CHEMBL586702
PAC-1	procaspase-3 activator	CASP3	G.Apoptotic modulator	Investigational (Ph 1)	DMSO	10000	YQNRVGJCPCNMKT-LFVJCYFKSA-N	CHEMBL591429
Vistusertib	mTOR inhibitor, ATP-competitive	MTOR	B.Kinase inhibitor	Investigational (Ph 2)	DMSO	10000	JUSFANSTBFGBAF-IRXDYDNUSA-N	CHEMBL2325741,CHEMBL2336325
Devimistat (CPI-613)	pyruvate dehydrogenase, alpha-ketoglutarate dehydrogenase inhibitor	PDHA1;PDHB;PDHX;OGDH	H.Metabolic modifier	Investigational (Ph 2)	DMSO	10000	ZYRLHJIMTROTBO-UHFFFAOYSA-N	CHEMBL3186849
Roxadustat	HIF prolyl hydroxylase inhibitor	HIF1A	E.Differentiating.epigenetic modifier	Investigational (Ph 2)	DMSO	10000	YOZBGTLTNGAVFU-UHFFFAOYSA-N	CHEMBL2338329
Pevonedistat	NAE inhibitor	NAE1	H.Metabolic modifier	Investigational (Ph 1)	DMSO	10000	MPUQHZXIXSTTDU-QGWWYQLQSA-N	CHEMBL1231160,CHEMBL2364622
GSK2636771	PI3K beta selective inhibitor	PIK3CB	B.Kinase inhibitor	Investigational (Ph 1)	DMSO	10000	XTKLTGBKIDQGQL-UHFFFAOYSA-N	CHEMBL3188551
AT-406	XIAP, cIAP1, cIAP2 inhibitor	XIAP;BIRC2;BIRC3	G.Apoptotic modulator	Investigational (Ph 1)	DMSO	10000	LSXUTRRVVSPWDZ-WOTGAKFBSA-N	not in ChEMBL
Lomeguatrib	O6-methylguanine-DNA methyltransferase inhibitor	MGMT	E.Differentiating.epigenetic modifier	Investigational (Ph 2)	DMSO	10000	JUJPKFNFCWJBCX-UHFFFAOYSA-N	CHEMBL339133
GSK269962	ROCK1 and ROCK2 inhibitor	ROCK1;ROCK2;RPS6KA5;RPS6KA1	B.Kinase inhibitor	Probe	DMSO	10000	YOVNFNXUCOWYSG-UHFFFAOYSA-N	CHEMBL220241,CHEMBL1909363
GSK650394	SGK1 & 2 inhibitor	SGK1	B.Kinase inhibitor	Probe	DMSO	10000	WVSBGSNVCDAMCF-UHFFFAOYSA-N	CHEMBL558642
AVN944	IMPDH inhibitor	IMPDH1	H.Metabolic modifier	Investigational (Ph 2)	DMSO	10000	GYCPCOJTCINIFZ-OXJNMPFZSA-N	not in ChEMBL
Venetoclax	Bcl-2-selective inhibitor	BCL2	G.Apoptotic modulator	Approved (US)	DMSO	1000	LQBVNQSMGBZMKD-UHFFFAOYSA-N	CHEMBL3137309
BMS-911543	JAK2 inhibitor	JAK2;SETD2;TYK2;JAK3	B.Kinase inhibitor	Investigational (Ph 1)	DMSO	10000	JCINBYQJBYJGDM-UHFFFAOYSA-N	not in ChEMBL
Ipatasertib	AKT inhibitor	AKT1;AKT2;AKT3	B.Kinase inhibitor	Investigational (Ph 2)	DMSO	10000	GRZXWCHAXNAUHY-NSISKUIASA-N	CHEMBL2177390
IOX-2	PHD2 inhibitor	EGLN1	E.Differentiating.epigenetic modifier	Probe	DMSO	50000	CAOSCCRYLYQBES-UHFFFAOYSA-N	CHEMBL3186774
GSK-J4	JMJD3 (histone demethylase) inhibitor	KDM6B	E.Differentiating.epigenetic modifier	Probe	DMSO	100000	WBKCKEHGXNWYMO-UHFFFAOYSA-N	CHEMBL3183531
UNC1215	L3MBTL3 inhibitor	L3MBTL3	E.Differentiating.epigenetic modifier	Probe	DMSO	10000	PQOOIERVZAXHBP-UHFFFAOYSA-N	CHEMBL2426364
SGC0946	DOT1L inhibitor	DOT1L	E.Differentiating.epigenetic modifier	Probe	DMSO	10000	IQCKJUKAQJINMK-HUBRGWSESA-N	CHEMBL3087498
UNC0642	G9a.GLP inhibitor	EHMT2	E.Differentiating.epigenetic modifier	Probe	DMSO	10000	RNAMYOYQYRYFQY-UHFFFAOYSA-N	not in ChEMBL, not in UniChem
GSK343	EZH2 inhibitor	EZH2	E.Differentiating.epigenetic modifier	Probe	DMSO	1000	ULNXAWLQFZMIHX-UHFFFAOYSA-N	CHEMBL2204995
UNC0638	G9a.GLP inhibitor	EHMT2	E.Differentiating.epigenetic modifier	Probe	DMSO	10000	QOECJCJVIMVJGX-UHFFFAOYSA-N	CHEMBL1231795
C646	p300.CREB-binding protein (CBP) inhibitor	EP300	E.Differentiating.epigenetic modifier	Probe	DMSO	25000	HEKJYZZSCQBJGB-UHFFFAOYSA-N	CHEMBL1797936
8-chloro-adenosine	Nucleoside analog, RNA synthesis inhibitor	RNA	A.Conv.Chemo	Investigational (Ph 2)	DMSO	50000	MHDPPLULTMGBSI-UUOKFMHZSA-N	CHEMBL1333540
8-amino-adenosine	Nucleoside analog, RNA synthesis inhibitor	RNA	A.Conv.Chemo	Probe	DMSO	50000	DVGWFQILDUEEGX-UUOKFMHZSA-N	CHEMBL516197
Rocilinostat	HDAC6 selective inhibitor	HDAC6	E.Differentiating.epigenetic modifier	Investigational (Ph 1)	DMSO	10000	QGZYDVAGYRLSKP-UHFFFAOYSA-N	CHEMBL2364628
ASP3026	ALK inhibitor	ALK	B.Kinase inhibitor	Investigational (Ph 1)	DMSO	10000	MGGBYMDAPCCKCT-UHFFFAOYSA-N	not in ChEMBL
Alectinib	ALK (incl gatekeeper mut) inhib	ALK	B.Kinase inhibitor	Approved (Japan, US)	DMSO	1000	KDGFLJKFZUIJMX-UHFFFAOYSA-N	CHEMBL1738797
Ganetespib	HSP90 inhibitor	HSP90AA1	K.HSP inhibitor	Investigational (Ph 3)	DMSO	1000	RVAQIUULWULRNW-UHFFFAOYSA-N	CHEMBL2103879
TRAM-34	intermediate-conductance Ca2+-activated K+ channel inh.	KCNN4	X.Other	Probe	DMSO	1000	KBFUQFVFYYBHBT-UHFFFAOYSA-N	CHEMBL498270
Pracinostat	HDAC inhibitor	HDAC1;HDAC2;HDAC3;HDAC8	E.Differentiating.epigenetic modifier	Investigational (Ph 2)	DMSO	10000	JHDKZFFAIZKUCU-ZRDIBKRKSA-N	CHEMBL1851943
AR-42	HDAC inhibitor	HDAC1;HDAC2;HDAC3;HDAC8	E.Differentiating.epigenetic modifier	Investigational (Ph 1)	DMSO	10000	LAMIXXKAWNLXOC-INIZCTEOSA-N	CHEMBL191482
Lonafarnib	Farnesyl transferase inhibitor	FNTA	E.Differentiating.epigenetic modifier	Investigational (Ph 3)	DMSO	100000	DHMTURDWPRKSOA-RUZDIDTESA-N	CHEMBL298734
Alpelisib	PI3Kalpha selective inhibitor	PIK3CA	B.Kinase inhibitor	Investigational (Ph 2)	DMSO	2500	STUWGJZDJHPWGZ-LBPRGKRZSA-N	CHEMBL2396661
Baricitinib	JAK inhibitor	JAK1;JAK2;JAK3;PTK2B	B.Kinase inhibitor	Approved (EU)	DMSO	2500	XUZMWHLSFXCVMG-UHFFFAOYSA-N	CHEMBL2105759
BX-912	PDK1 inhibitor	PDK1	B.Kinase inhibitor	Probe	DMSO	10000	DMMILYKXNCVKOJ-UHFFFAOYSA-N	not in ChEMBL
AZD-5363	AKT inhibitor	AKT1;AKT2;AKT3;ROCK2	B.Kinase inhibitor	Investigational (Ph 2)	DMSO	10000	JDUBGYFRJFOXQC-KRWDZBQOSA-N	CHEMBL2325741
CUDC-305	HSP90 inhibitor	HSP90AA1	K.HSP inhibitor	Investigational (Ph 1)	DMSO	10000	RVJIQAYFTOPTKK-UHFFFAOYSA-N	CHEMBL2419346
Oprozomib	proteasome (20 S) inhibitor	PSMB5;PSMB8	L.Protease.proteasome inhibitor	Investigational (Ph 1)	DMSO	2500	SWZXEVABPLUDIO-WSZYKNRRSA-N	CHEMBL2103884
Fedratinib	JAK2-selective inhibitor	JAK2;JAK1;FLT3;RET	B.Kinase inhibitor	Investigational (Ph 2)	DMSO	10000	JOOXLOJCABQBSG-UHFFFAOYSA-N	CHEMBL1287853
PF-03758309	PAK4 inhibitor	PAK4	B.Kinase inhibitor	Investigational (Ph 1)	DMSO	10000	AYCPARAPKDAOEN-LJQANCHMSA-N	CHEMBL3128043
GSK-2334470	PDK1 inhibitor	PDK1	B.Kinase inhibitor	Probe	DMSO	10000	QLPHOXTXAKOFMU-WBVHZDCISA-N	CHEMBL1765740
Pomalidomide	Immunomodulatory agent, anti-angiogenic	CRBN;PTGS2;TNF	D.Immunomodulatory	Approved	DMSO	10000	UVSMNLNDYGZFPF-UHFFFAOYSA-N	CHEMBL43452
Bafetinib	ABL, Lyn inhibitor	ABL1;LYN	B.Kinase inhibitor	Investigational (Ph 2)	DMSO	1000	ZOPBZHLJXQAQON-VWLOTQADSA-N	not in ChEMBL
Orteronel	CYP17A1, androgen synth inhib.	CYP17A1	F.Hormone therapy	Investigational (Ph 3)	DMSO	10000	OZPFIJIOIVJZMN-SFHVURJKSA-N	CHEMBL1921976
EPZ-5687	EZH2 inhibitor	EZH2	E.Differentiating.epigenetic modifier	Probe	DMSO	10000	ZOIBZSZLMJDVDQ-UHFFFAOYSA-N	not in ChEMBL
LY-2874455	FGFR inhibitor	FGFR1;FGFR2;FGFR3	B.Kinase inhibitor	Investigational (Ph 1)	DMSO	1000	GKJCVYLDJWTWQU-CXLRFSCWSA-N	not in ChEMBL
Apalutamide	AR antagonist	AR	F.Hormone therapy	Investigational (Ph 2)	DMSO	10000	HJBWBFZLDZWPHF-UHFFFAOYSA-N	CHEMBL3183409
Tideglusib	GSK3 inhibitor	GSK3B;GSK3A	B.Kinase inhibitor	Investigational (Ph 2)	DMSO	3000	PMJIHLSCWIDGMD-UHFFFAOYSA-N	not in ChEMBL
SGI-1776	PIM kinase inhibitor	PIM1	B.Kinase inhibitor	Investigational (Ph 1)	DMSO	10000	MHXGEROHKGDZGO-UHFFFAOYSA-N	CHEMBL1952329
Rigosertib	Ras-Raf interaction inhibitor, contaminated by microtubile depolymerizer, PLK1 Inhibitor	PLK1;SRC;FLT1;PDGFRB;ABL1	X.Other	Investigational (Ph 3)	DMSO	10000	OWBFCJROIKNMGD-BQYQJAHWSA-M	not in ChEMBL
Milciclib	CDK2 inhibitor	CDK2;CDK4;CDK5;CDK7;NTRK1	B.Kinase inhibitor	Investigational (Ph 2)	DMSO	10000	RXZMYLDMFYNEIM-UHFFFAOYSA-N	CHEMBL564829
Lenvatinib	VEGFR inhibitor	FLT1;KDR;FLT4;KIT;PDGFRA;PDGFRB;FGFR1;FGFR2;FGFR3;FGFR4;RET;KIT	B.Kinase inhibitor	Approved (US)	DMSO	2500	WOSKHXYHFSIKNG-UHFFFAOYSA-N	CHEMBL1289601
Duvelisib	PI3K inhibitor	PIK3CD	B.Kinase inhibitor	Investigational (Ph 3)	DMSO	500	SJVQHLPISAIATJ-ZDUSSCGKSA-N	CHEMBL3039502
Icotinib	EGFR inhibitor	EGFR	B.Kinase inhibitor	Investigational (Ph 2)	DMSO	10000	QQLKULDARVNMAL-UHFFFAOYSA-N	CHEMBL2087361
Cilengitide	alphaVbeta3 integrin inhibitor	ITGAV	X.Other	Investigational (Ph 3)	DMSO	10000	AMLYAMJWYAIXIA-VWNVYAMZSA-N	CHEMBL429876
Apatinib	VEGFR inhibitor	KDR;KIT;RET;SRC;;PDGFRA	B.Kinase inhibitor	Investigational (Ph 3)	DMSO	10000	WPEWQEMJFLWMLV-UHFFFAOYSA-N	CHEMBL3186534
Amuvatinib	Broad spectrum TK inhib	KIT;PDGFRA;FLT3	B.Kinase inhibitor	Investigational (Ph 2)	DMSO	10000	FOFDIMHVKGYHRU-UHFFFAOYSA-N	CHEMBL2103851
SCH772984	ERK1 & 2 inhibitor	MAPK3	B.Kinase inhibitor	Probe	DMSO	10000	HDAJDNHIBCDLQF-RUZDIDTESA-N	not in ChEMBL
Telatinib	VEGFR, KIT, PDGFR inhibitor	KDR;FLT4;KIT;PDGFRA	B.Kinase inhibitor	Investigational (Ph 2)	DMSO	10000	QFCXANHHBCGMAS-UHFFFAOYSA-N	CHEMBL2079588
Triciribine	AKT inhibitor	AKT1;AKT2;AKT3	B.Kinase inhibitor	Investigational (Ph 2)	DMSO	100000	HOGVTUZUJGHKPL-HTVVRFAVSA-N	CHEMBL331237
Tozasertib	pan-Aurora inhibitor	AURKA;AURKB;AURKC;FLT3;ABL1	B.Kinase inhibitor	Investigational (Ph 2)	DMSO	10000	GCIKSSRWRFVXBI-UHFFFAOYSA-N	CHEMBL572878
Varlitinib	EGFR HER2 inhibitor	EGFR;ERBB2	B.Kinase inhibitor	Investigational (Ph 2)	DMSO	10000	UWXSAYUXVSFDBQ-CYBMUJFWSA-N	CHEMBL2103842
Golvatinib	MET, VEGFR2 inhibitor	KDR;MET	B.Kinase inhibitor	Investigational (Ph 2)	DMSO	2500	UQRCJCNVNUFYDX-UHFFFAOYSA-N	CHEMBL3039525
Copanlisib	PI3K alpha, delta selective inhibitor	PIK3CA;PIK3CB;PIK3CG;PIK3CD	B.Kinase inhibitor	Investigational (Ph 2)	DMSO	1000	PZBCKZWLPGJMAO-UHFFFAOYSA-N	CHEMBL3218576
Sapitinib	Pan-HER inhibitor	EGFR;ERBB2;ERBB3	B.Kinase inhibitor	Investigational (Ph 2)	DMSO	1000	DFJSJLGUIXFDJP-UHFFFAOYSA-N	CHEMBL2408045
AT7519	CDK1, 2, 4, 6 and 9 inhibitor	CDK1;CDK2;CDK5;CDK9;GSK3B	B.Kinase inhibitor	Investigational (Ph 1)	DMSO	10000	OVPNQJVDAFNBDN-UHFFFAOYSA-N	CHEMBL445813
NVP-BGT226	PI3K.mTOR inhibitor	PIK3CA;PIK3CB;PIK3CG;MTOR	B.Kinase inhibitor	Investigational (Ph 2)	DMSO	1000	BMMXYEBLEBULND-UHFFFAOYSA-N	CHEMBL3218578
BMS-777607	MET, Axl, Ron and Tyro3 inhibitor	MST1R;AXL;MET;TYRO3;MERTK;AURKB	B.Kinase inhibitor	Investigational (Ph 2)	DMSO	2500	VNBRGSXVFBYQNN-UHFFFAOYSA-N	CHEMBL460702
Abemaciclib	CDK4, 6 inhibitor	CDK4;CDK6	B.Kinase inhibitor	Investigational (Ph 3)	DMSO	2500	UZWDCWONPYILKI-UHFFFAOYSA-N	CHEMBL3301610
Ceritinib	ALK inhibitor	ALK;IGF1R;INSR	B.Kinase inhibitor	Approved	DMSO	2500	VERWOWGGCGHDQE-UHFFFAOYSA-N	CHEMBL2403108
Neflamapimod	p38MAPK inhibitor	MAPK14	B.Kinase inhibitor	Investigational (Ph 2)	DMSO	10000	VEPKQEUBKLEPRA-UHFFFAOYSA-N	CHEMBL119385
Tesevatinib	EGFR, ERBB2, VEGFR, EPHB4	EGFR;EGF;ERBB2;KDR;FLT4;EPHB4	B.Kinase inhibitor	Investigational (Ph 2)	DMSO	1000	HVXKQKFEHMGHSL-QDMKHBRRSA-N	not in ChEMBL
Hydroxyfasudil	ROCK, PKA, PKG, PRK inhibitor	ROCK1;ROCK2;PRKACA;PKIA	B.Kinase inhibitor	(Approved Japan)	DMSO	19000	ZAVGJDAFCZAWSZ-UHFFFAOYSA-N	CHEMBL1233300
Lucitanib	FGFR1, VEGFR inhibitor	FGFR1;FGFR2;FLT1;FLT4;KDR	B.Kinase inhibitor	Investigational (Ph 2)	DMSO	10000	CUDVHEFYRIWYQD-UHFFFAOYSA-N	CHEMBL2220486
ENMD-2076	pan-Aurora, VEGFR inhibitor	AURKA;FLT3;RET;FLT4;SRC;CSF1R;NTRK1;PDGFRA;BLK;KDR;YES1;FYN;AURKB;PTK2;FGFR2;FGFR1;JAK2;KIT;ABL1	B.Kinase inhibitor	Investigational (Ph 2)	DMSO	10000	BLQYVHBZHAISJM-CMDGGOBGSA-N	CHEMBL482968
PD0325901	MEK1.2 inhibitor	MAP2K1	B.Kinase inhibitor	Investigational (Ph 2)	DMSO	1000	SUDAHWBOROXANE-SECBINFHSA-N	CHEMBL507361
PH-797804	p38MAPK inhibitor	MAPK14	B.Kinase inhibitor	Investigational (Ph 2)	DMSO	1000	KCAJXIDMCNPGHZ-UHFFFAOYSA-N	CHEMBL1088751
TG100-115	PI3K gamma, delta inhibitor	PIK3CG;PIK3CD	B.Kinase inhibitor	Investigational (Ph 2)	DMSO	10000	UJIAQDJKSXQLIT-UHFFFAOYSA-N	CHEMBL230011
Tucatinib	HER2 inhibitor	ERBB2	B.Kinase inhibitor	Investigational (Ph 1)	DMSO	2500	QVMNYGOVNWWFKF-UHFFFAOYSA-N	not in ChEMBL
GSK-1070916	Aurora B, Aurora C inhibitor	AURKB;AURKC	B.Kinase inhibitor	Investigational (Ph 1)	DMSO	1000	QTBWCSQGBMPECM-UHFFFAOYSA-N	CHEMBL1090479
GSK-461364	PLK1 inhibitor	PLK1	B.Kinase inhibitor	Investigational (Ph 1)	DMSO	10000	ZHJGWYRLJUCMRT-QGZVFWFLSA-N	CHEMBL1908394
Capmatinib	MET inhibitor	MET	B.Kinase inhibitor	Investigational (Ph 2)	DMSO	1000	LIOLIMKSCNQPLV-UHFFFAOYSA-N	CHEMBL3188267
Palomid-529	AKT, MTOR, PI3K inhibitor	PIK3CA;PIK3CB;PIK3CD;PIK3CG;AKT1;AKT2;AKT3;MTOR	B.Kinase inhibitor	Investigational (Ph 1)	DMSO	10000	YEAHTLOYHVWAKW-UHFFFAOYSA-N	CHEMBL2141712
PF-00562271	FAK inhibitor	PTK2	B.Kinase inhibitor	Investigational (Ph 1)	DMSO	10000	MZDKLVOWGIOKTN-UHFFFAOYSA-N	CHEMBL1084546
Gedatolisib	PI3K.mTOR inhibitor	PIK3CA;PIK3CG;MTOR	B.Kinase inhibitor	Investigational (Ph 2))	DMSO	1000	DWZAEMINVBZMHQ-UHFFFAOYSA-N	CHEMBL592445
TAK-285	HER2 inhibitor	ERBB2	B.Kinase inhibitor	Investigational (Ph 1)	DMSO	2500	ZYQXEVJIFYIBHZ-UHFFFAOYSA-N	CHEMBL1614725
Agerafenib (CEP-32496)	BRAF(V600E) inhibitor	BRAF;RAF1;KIT;RET;LCK;ABL1;PDGFRB;CSF1R;MET;EGFR;KDR;EPHA2	B.Kinase inhibitor	Investigational (Ph 2)	DMSO	10000	DKNUPRMJNUQNHR-UHFFFAOYSA-N	CHEMBL2029988
IOX-1	2-Oxoglutarate Oxygenase Inhibitor	KDM3A;KDM4C;KDM6B;KDM2A;KDM4E;KDM5C;EGLN1	E.Differentiating.epigenetic modifier	Probe	DMSO	100000	JGRPKOGHYBAVMW-UHFFFAOYSA-N	CHEMBL1230640
AZD-6482	PI3K beta selective inhibitor	PIK3CB	B.Kinase inhibitor	Investigational (Ph 1)	DMSO	2500	IRTDIKMSKMREGO-OAHLLOKOSA-N	CHEMBL2165191
GSK-690693	AKT, PKA, PKC inhibitor	AKT1;AKT2;AKT3;PRKCE;PRKCB;PRKCD;PRKCH;PRKCQ;PRKX;PRKG1	B.Kinase inhibitor	Investigational (Ph 1)	DMSO	10000	KGPGFQWBCSZGEL-ZDUSSCGKSA-N	CHEMBL494089
OSU-03012	PDPK1 inhibitor	PDPK1	B.Kinase inhibitor	Investigational (Ph 1)	DMSO	25000	YULUCECVQOCQFQ-UHFFFAOYSA-N	CHEMBL1650595
NVP-AEW541	IGF1R inhibitor	IGF1R	B.Kinase inhibitor	Investigational (Ph 1)	DMSO	10000	AECDBHGVIIRMOI-GRGXKFILSA-N	CHEMBL1614712
AZD-1080	GSK3 inhibitor	GSK3B;GSK3A	B.Kinase inhibitor	Investigational (Ph 1)	DMSO	10000	BLTVBQXJFVRPFK-UHFFFAOYSA-N	CHEMBL1969664
MK-8776	CHEK1 inhibitor	CHEK1	B.Kinase inhibitor	Investigational (Ph 1)	DMSO	2500	GMIZZEXBPRLVIV-SECBINFHSA-N	CHEMBL2386889
AZD-5438	CDK1, 2, 9 inhibitor	CDK1;CDK2;CDK9	B.Kinase inhibitor	Investigational (Ph 1)	DMSO	10000	WJRRGYBTGDJBFX-UHFFFAOYSA-N	CHEMBL488436
Silmitasertib	CSNK2A1 inhibitor	CSNK2A1	B.Kinase inhibitor	Investigational (Ph 2)	DMSO	10000	MUOKSQABCJCOPU-UHFFFAOYSA-N	CHEMBL1230165
Mubritinib	HER2 inhibitor	ERBB2	B.Kinase inhibitor	Investigational (Ph 1)	DMSO	1000	ZTFBIUXIQYRUNT-MDWZMJQESA-N	CHEMBL1614707
AZD-8186	PI3K beta inhibitor	PIK3CG	B.Kinase inhibitor	Investigational (Ph 1)	DMSO	1000	LMJFJIDLEAWOQJ-CQSZACIVSA-N	not in ChEMBL
GDC-0623	MEK1.2 inhibitor	MAP2K1	B.Kinase inhibitor	Investigational (Ph 2)	DMSO	2500	RFWVETIZUQEJEF-UHFFFAOYSA-N	not in ChEMBL
Talmapimod	p38MAPK alpha selective inhibitor	MAPK14	B.Kinase inhibitor	Investigational (Ph 2)	DMSO	10000	ZMELOYOKMZBMRB-DLBZAZTESA-N	CHEMBL514201
Birinapant	IAPs, SMAC mimetic	XIAP;BIRC2;BIRC3	G.Apoptotic modulator	Investigational (Ph 2)	DMSO	1000	PKWRMUKBEYJEIX-DXXQBUJASA-N	CHEMBL3039522
NVP-LCL161	IAPs, SMAC mimetic	XIAP;BIRC2	G.Apoptotic modulator	Investigational (Ph 2)	DMSO	25000	UFPFGVNKHCLJJO-SSKFGXFMSA-N	CHEMBL2431768
Tazemetostat	EZH2 inhibitor	EZH2	E.Differentiating.epigenetic modifier	Investigational (Ph 2)	DMSO	10000	NSQSAUGJQHDYNO-UHFFFAOYSA-N	not in ChEMBL
Pinometostat	DOT1L inhibitor	DOT1L	E.Differentiating.epigenetic modifier	Investigational (Ph 1)	DMSO	1000	LXFOLMYKSYSZQS-LURJZOHASA-N	not in ChEMBL
PHA-408	IKK-2 inhibitor	IKBKB	B.Kinase inhibitor	Probe	DMSO	10000	ZLEZHGHFWIHCGU-UHFFFAOYSA-N	CHEMBL592893
PS-1145	IKK-2 inhibitor	IKBKB	B.Kinase inhibitor	Probe	DMSO	25000	JZRMBDHPALEPDM-UHFFFAOYSA-N	CHEMBL79004
KU-60019	ATM inhibitor	ATM	B.Kinase inhibitor	Probe	DMSO	25000	SCELLOWTHJGVIC-BGYRXZFFSA-N	CHEMBL2140173
Selinexor	XPO1.CRM1 inhibitor	XPO1	G.Apoptotic modulator	Investigational (Ph 2)	DMSO	10000	DEVSOMFAQLZNKR-RJRFIUFISA-N	not in ChEMBL
GSK2801	BAZ2B.A bromodomain inhibitor	BAZ2B;BAZ2A	E.Differentiating.epigenetic modifier	Probe	DMSO	10000	KHWCPNJRJCNVRI-UHFFFAOYSA-N	not in ChEMBL
SGC-CBP30	CREBBP.EP300 bromodomain inhibitor	CREBBP	E.Differentiating.epigenetic modifier	Probe	DMSO	25000	GEPYBHCJBORHCE-SFHVURJKSA-N	not in ChEMBL
TH588	MTH1 inhibitor	NUDT1	H.Metabolic modifier	Probe	DMSO	25000	PNMYJIOQIAEYQL-UHFFFAOYSA-N	not in ChEMBL
VGX-1027	Nitric oxide-donating immunomodulator	TLR4;TLR2;TLR6;TNF	D.Immunomodulatory	Investigational (Ph 1)	DMSO	10000	MUFJHYRCIHHATF-UHFFFAOYSA-N	CHEMBL1320667
Birabresib	BET family inhibitor	BRD2;BRD3;BRD4	E.Differentiating.epigenetic modifier	Investigational (Ph 2)	DMSO	10000	GNMUEVRJHCWKTO-FQEVSTJZSA-N	not in ChEMBL
Encorafenib	BRAF(V600E) inhibitor	BRAF;RAF1	B.Kinase inhibitor	Investigational (Ph 2)	DMSO	1000	CMJCXYNUCSMDBY-ZDUSSCGKSA-N	CHEMBL3301612
URB597	FAAH inhibitor	FAAH	H.Metabolic modifier	Investigational (Ph 1)	DMSO	1000	ROFVXGGUISEHAM-UHFFFAOYSA-N	CHEMBL184238
Fimepinostat (CUDC-907)	HDAC1.2.3.10,11 PI3Kalpha inhibitor	HDAC1;HDAC2;HDAC3;HDAC10;HDAC11;PIK3CA	E.Differentiating.epigenetic modifier	Investigational (Ph 2)	DMSO	10000	JOWXJLIFIIOYMS-UHFFFAOYSA-N	not in ChEMBL
MK-8745	Aurora A inhibitor	AURKA	B.Kinase inhibitor	Probe	DMSO	10000	YCRFPWKUUNKNDN-UHFFFAOYSA-N	not in ChEMBL
GDC-0919	IDO inhibitor	IDO1	D.Immunomodulatory	Investigational (Ph 1)	DMSO	10000	YTRRAUACYORZLX-UHFFFAOYSA-N	not in ChEMBL
NVP-LGK974	PORCN inhibitor	PORCN	X.Other	Investigational (Ph 1)	DMSO	10000	XXYGTCZJJLTAGH-UHFFFAOYSA-N	CHEMBL3188386
ONX-0914	LMP7 (immunoproteasome)	PSMB8	L.Protease.proteasome inhibitor	Probe	DMSO	10000	WQAVPPWWLLVGFK-VTNASVEKSA-N	CHEMBL3237875
RGFP966	HDAC3 inhibitor	HDAC3	E.Differentiating.epigenetic modifier	Probe	DMSO	10000	BLVQHYHDYFTPDV-VCABWLAWSA-N	not in ChEMBL
NMS-873	p97.VCP inhibitor	VCP	X.Other	Probe	DMSO	10000	UJGTUKMAJVCBIS-UHFFFAOYSA-N	CHEMBL2311578
AZ191	DYRK1A inhibitor	DYRK1A	B.Kinase inhibitor	Probe	DMSO	10000	ZYVXTMKTGDARKR-UHFFFAOYSA-N	not in ChEMBL
Ribociclib	CDK4, 6 inhibitor	CDK4;CDK6	B.Kinase inhibitor	Approved (US)	DMSO	10000	RHXHGRAEPCAFML-UHFFFAOYSA-N	not in ChEMBL
Triapine	ribonucleotide reductase inhibitor	RRM1;RRM2	H.Metabolic modifier	Investigational (Ph 2)	DMSO	10000	XMYKNCNAZKMVQN-NYYWCZLTSA-N	CHEMBL231616
VE-821	ATR inihibitor	ATR	B.Kinase inhibitor	Probe	DMSO	10000	DUIHHZKTCSNTGM-UHFFFAOYSA-N	CHEMBL1766779
Pacritinib	FLT3, JAK2 inhibitor	FLT3;JAK2;TYK2	B.Kinase inhibitor	Investigational (Ph 3)	DMSO	10000	HWXVIOGONBBTBY-ONEGZZNKSA-N	CHEMBL2035187
Tanzisertib	JNK inhibitor	MAPK8	B.Kinase inhibitor	Investigational (Ph 2)	DMSO	10000	IBGLGMOPHJQDJB-IHRRRGAJSA-N	CHEMBL1950289
GSK923295	CENP-E inhibitor	CENPE	I.Kinesin inhibitor	Investigational (Ph 1)	DMSO	10000	WHMXDBPHBVLYRC-OFVILXPXSA-N	not in ChEMBL
Bentamapimod	JNK inhibitor	MAPK8	B.Kinase inhibitor	Investigational (Ph 1)	DMSO	10000	XCPPIJCBCWUBNT-UHFFFAOYSA-N	not in ChEMBL
Idasanutlin	p53-MDM2 inhibitor	MDM2;TP53	G.Apoptotic modulator	Investigational (Ph 3)	DMSO	10000	TVTXCJFHQKSQQM-LJQIRTBHSA-N	CHEMBL2402737
Aldoxorubicin	Topoisomerase II inhibitor, Albumin binding	TOP2A;TOP2B	A.Conv.Chemo	Investigational (Ph 3)	DMSO	1000	OBMJQRLIQQTJLR-USGQOSEYSA-N	CHEMBL2107818
Filanesib	KSP.Eg5 inhibitor	KIF11	I.Kinesin inhibitor	Investigational (Ph 2)	DMSO	1000	LLXISKGBWFTGEI-FQEVSTJZSA-N	CHEMBL2347655
Talazoparib	PARP1.2 inhibitor	PARP1	E.Differentiating.epigenetic modifier	Investigational (Ph 3)	DMSO	1000	HWGQMRYQVZSGDQ-HZPDHXFCSA-N	CHEMBL3137320
Tasquinimod	S100A9 inhibitor, immunomodulatory, anti-angiogenic	S100A9	D.Immunomodulatory	Investigational (Ph 3)	DMSO	10000	ONDYALNGTUAJDX-UHFFFAOYSA-N	CHEMBL2107784
Resminostat	HDAC1, 3, 6 inhibitor	HDAC1;HDAC3;HDAC6	E.Differentiating.epigenetic modifier	Investigational (Ph 2)	DMSO	10000	FECGNJPYVFEKOD-VMPITWQZSA-N	not in ChEMBL
WEHI-539	Bcl-XL inhibitor	BCL2L1	G.Apoptotic modulator	Probe	DMSO	2500	JKMWZKPAXZBYEH-BGDIREAQSA-N	not in ChEMBL
Cobimetinib	MEK1.2 inhibitor	MAP2K1	B.Kinase inhibitor	Approved (US)	DMSO	1000	BSMCAPRUBJMWDF-KRWDZBQOSA-N	CHEMBL2146883
AZD1208	PIM1, 2, 3 kinase inhibitor	PIM1	B.Kinase inhibitor	Investigational (Ph 1)	DMSO	10000	MCUJKPPARUPFJM-UWCCDQBKSA-N	CHEMBL2048872
BGB324	Axl inhibitor	AXL	B.Kinase inhibitor	Investigational (Ph 1)	DMSO	10000	KXMZDGSRSGHMMK-VWLOTQADSA-N	not in ChEMBL
AZD7545	PDHK inhibitor	PDK2	B.Kinase inhibitor	Probe	DMSO	10000	NA	NA
Osimertinib	EGFR(L858R.T790M) inhibitor	EGFR	B.Kinase inhibitor	Approved	DMSO	2500	NA	NA
BMS863233	Cdc7 inhibitor	CDC7	B.Kinase inhibitor	Investigational (Ph 2)	AQ	10000	NA	NA
Darapladib	lipoprotein-associated phospholipase A2 inhibitor	PLA2G4A;PLA2G7	X.Other	Investigational (Ph 3)	DMSO	1000	NA	NA
GNE-0877	LRRK2 inhibitor	LRRK2	B.Kinase inhibitor	Probe	DMSO	1000	NA	NA
Entospletinib	SYK inhibitor	SYK	B.Kinase inhibitor	Investigational (Ph 2)	DMSO	5000	NA	NA
Ixazomib	20S proteasome inhibitor	PSMB5	L.Protease.proteasome inhibitor	Approved	DMSO	1000	NA	NA
Losmapimod	p38MAPK inhibitor	MAPK14	B.Kinase inhibitor	Investigational (Ph 3)	DMSO	10000	NA	NA
ML323	USP1-UAF1 inhibitor	USP1;WDR48	X.Other	Probe	DMSO	10000	NA	NA
OTS167	MELK inhibitor	MELK	B.Kinase inhibitor	Investigational (Ph 2)	DMSO	1000	NA	NA
PTC-209	BMI-1 inhibitor	BMI1	E.Differentiating.epigenetic modifier	Probe	DMSO	10000	NA	NA
UNC2881	MER inhibitor	MERTK	B.Kinase inhibitor	Probe	DMSO	2500	NA	NA
AMG-232	MDM2 inhibitor	MDM2;TP53	G.Apoptotic modulator	Investigational (Ph 2)	DMSO	10000	NA	NA
AMG-925	FLT3, CDK4 inhibitor	FLT3;CDK4	B.Kinase inhibitor	Probe	DMSO	1000	NA	NA
CEP-37440	ALK inhibitor	ALK;AXL;MET;TYRO3;MERTK;KDR;DDR1	B.Kinase inhibitor	Investigational (Ph 1)	DMSO	5000	NA	NA
Rociletinib	EGFR(L858R.T790M) inhibitor	EGFR	B.Kinase inhibitor	Investigational (Ph 3)	DMSO	10000	NA	NA
FRAX486	PAK1, 2, 3 inhibitor	PAK1	B.Kinase inhibitor	Probe	DMSO	5000	NA	NA
GNE-7915	LRRK2 inhibitor	LRRK2	B.Kinase inhibitor	Probe	DMSO	1000	NA	NA
GSK2830371	Wip1 inhibitor	PPM1D	X.Other	Probe	DMSO	5000	NA	NA
Molibresib	BET family inhibitor	BRD2;BRD3;BRD4	E.Differentiating.epigenetic modifier	Investigational (Ph 1)	DMSO	10000	NA	NA
BCI	Dusp6 inhibitor	DUSP6	X.Other	Probe	DMSO	50000	NA	NA
MST-312	Telomerase inhibitor	TERT	X.Other	Probe	DMSO	10000	NA	NA
Taselisib	PI3K alpha, delta, (gamma) selective inhibitor	PIK3CA;PIK3CD;PIK3CG	B.Kinase inhibitor	Investigational (Ph 3)	DMSO	1000	NA	NA
GSK2656157	PERK inhibitor	EIF2AK3	B.Kinase inhibitor	Probe	DMSO	2500	NA	NA
TAK-530	Pan-HER inhibitor	EGFR;ERBB2;ERBB3	B.Kinase inhibitor	Investigational (Ph 1)	DMSO	10000	NA	NA
Glasdegib	Smo inhibitor	SMO	M.Hedgehog inhibitor	Investigational (Ph 2)	DMSO	1000	SFNSLLSYNZWZQG-VQIMIIECSA-N	CHEMBL2043437
Onalespib	HSP90 inhibitor	HSP90AA1	K.HSP inhibitor	Investigational (Ph 2)	DMSO	2500	NA	NA
Uprosertib	AKT inhibitor	AKT1;AKT2;AKT3	B.Kinase inhibitor	Investigational (Ph 2)	DMSO	10000	NA	NA
AT13148	p70S6K, PKA, ROCK (AKT) inhibitor	AKT1;AKT2;AKT3;RPS6KB1;ROCK1;ROCK2;PRKACA;PRKACB;PRKACG	B.Kinase inhibitor	Investigational (Ph 1)	DMSO	10000	NA	NA
Cerdulatinib	JAK, SYK inhibitor	JAK1;JAK2;JAK3;TYK2;SYK	B.Kinase inhibitor	Investigational (Ph 1)	DMSO	10000	NA	NA
Filgotinib	JAK1-selective inhibitor	JAK1;JAK2;TYK2	B.Kinase inhibitor	Investigational (Ph 2)	DMSO	10000	NA	NA
Afuresertib	AKT1-selective inhibitor	AKT1;AKT2;AKT3	B.Kinase inhibitor	Investigational (Ph 2)	DMSO	1000	NA	NA
UM729	Enhancer of aryl hydrocarbon receptor (AHR) antagonists	AHR	E.Differentiating.epigenetic modifier	Probe	DMSO	10000	NA	NA
PF-06463922	ALK, ROS1 inhibitor	ALK;LTK;FER;FES;PTK2B;TNK2;PTK2;NTRK1;NTRK2;NTRK3;FRK;ROS1	B.Kinase inhibitor	Investigational (Ph 2)	DMSO	1000	NA	NA
Vactosertib (TEW-7197)	TGF-? receptor ALK4.ALK5 inhibitor	TGFBR1;ACVR1B	B.Kinase inhibitor	Investigational (Ph 1)	DMSO	2500	NA	NA
Sabutoclax	pan-Bcl-2 family inhibitor	BCL2;BCL2L1;MCL1;BCL2A1	G.Apoptotic modulator	Probe	DMSO	25000	NA	NA
SH-4-54	STAT3 inhibitor	STAT3	X.Other	Probe	DMSO	25000	NA	NA
BAY_87-2243	HIF1alpha inhibitor	HIF1A	E.Differentiating.epigenetic modifier	Investigational (Ph 1)	DMSO	1000	NA	NA
Givinostat	HDAC inhibitor	HDAC1;HDAC2;HDAC3;HDAC4;HDAC5;HDAC6;HDAC7;HDAC8;HDAC10	E.Differentiating.epigenetic modifier	Investigational (Ph 2)	DMSO	1000	NA	NA
Amsacrine	DNA intercalation, Topoisomerase II inhibitor	TOP2A;TOP2B;DNA	A.Conv.Chemo	Approved	DMSO	10000	NA	NA
PCI-34051	HDAC8 inhibitor	HDAC8	E.Differentiating.epigenetic modifier	Probe	DMSO	10000	NA	NA
Cabazitaxel	Mitotic inhibitor, taxane microtubule stabilizer, antimitotic	TUBB1;TUBA4A	A.Conv.Chemo	Approved	DMSO	1000	NA	NA
Ravoxertinib	ERK inhibitor	MAPK3	B.Kinase inhibitor	Investigational (Ph 1)	DMSO	10000	NA	NA
KD025	ROCK2 inhibitor	ROCK2	B.Kinase inhibitor	Investigational (Ph 2)	DMSO	5000	NA	NA
Merestinib	MET inhibitor	MET	B.Kinase inhibitor	Investigational (Ph 2)	DMSO	1000	NA	NA
Pixantrone	Topoisomerase II inhibitor	TOP2A	A.Conv.Chemo	Investigational (Ph 3)	AQ	10000	NA	NA
Poziotinib	Pan-HER inhibitor	EGFR;ERBB2;ERBB3	B.Kinase inhibitor	Investigational (Ph 2)	DMSO	1000	NA	NA
Spebrutinib	BTK inhibitor	BTK	B.Kinase inhibitor	Investigational (Ph 2)	DMSO	1000	NA	NA
Verdinexor	XPO1.CRM1 inhibitor	XPO1	G.Apoptotic modulator	Investigational (Ph 1)	DMSO	1000	NA	NA
Romidepsin	HDAC inhibitor	HDAC1;HDAC2	E.Differentiating.epigenetic modifier	Approved	DMSO	1000	NA	NA
Abexinostat	HDAC1-selective inhibitor	HDAC1	E.Differentiating.epigenetic modifier	Investigational (Ph 2)	DMSO	10000	NA	NA
A-1210477	MCL-1 inhibitor	MCL1	G.Apoptotic modulator	Probe	DMSO	50000	NA	NA
VS-4718	FAK inhibitor	PTK2	B.Kinase inhibitor	Investigational (Ph 1)	DMSO	10000	NA	NA
GSK2879552	LSD1 inhibitor	KDM1A	E.Differentiating.epigenetic modifier	Investigational (Ph 1)	DMSO	100000	LRULVYSBRWUVGR-FOIFJWKZSA-N	NA
Ulixertinib	ERK inhibitor	MAPK1;MAPK3	B.Kinase inhibitor	Investigational (Ph 2)	DMSO	10000	NA	NA
LY3009120	Pan-RAF inhibitor (Pan-HER inhibitor)	BRAF;RAF1	B.Kinase inhibitor	Investigational (Ph 1)	DMSO	10000	NA	NA
Pexidartinib	KIT, CSF1R, FLT3 inhibitor	CSF1R;FLT3;KIT	B.Kinase inhibitor	Investigational (Ph 3)	DMSO	10000	NA	NA
Marimastat	MMP-9, MMP-1, MMP-2, MMP-14, MMP-7 inhibitor	MMP1;MMP2;MMP9;MMP7;MMP14	X.Other	Investigational (Ph 3)	DMSO	10000	NA	NA
EPZ015666	PRMT5 inhibitor	PRMT5	E.Differentiating.epigenetic modifier	Probe	DMSO	10000	NA	NA
SAR405838	MDM2 inhibitor	MDM2	G.Apoptotic modulator	Investigational (Ph 1)	DMSO	10000	NA	NA
Prexasertib	CHEK1 inhibitor	CHEK1	B.Kinase inhibitor	Investigational (Ph 2)	DMSO	10000	NA	NA
Epacadostat	IDO inhibitor	IDO1	D.Immunomodulatory	Investigational (Ph 3)	DMSO	10000	NA	not in ChEMBL
AZD3965	MCT1 inhibitor	SLC16A1	H.Metabolic modifier	Investigational (Ph 1)	DMSO	1000	NA	NA
Decernotinib	JAK3 inhibitor	JAK3;JAK1;JAK2;TYK2	B.Kinase inhibitor	Investigational (Ph 3)	DMSO	10000	NA	NA
Omaveloxolone	Nrf2 activator	NFE2L2	X.Other	Investigational (Ph 2)	DMSO	10000	NA	NA
BRD7116	Leukemic stem cell inhibitor	PDX1	X.Other	Probe	DMSO	10000	NA	NA
A-419259	HCK and other SRC family kinase inhibitor	SRC;LCK;LYN;HCK	B.Kinase inhibitor	Probe	DMSO	10000	NA	NA
Napabucasin	CSC inhibitor, STAT3 mediated	STAT3	X.Other	Investigational (Ph 3)	DMSO	20000	NA	NA
Enasidenib	IDH2-R140Q inhibitor	IDH2	E.Differentiating.epigenetic modifier	Approved (US)	DMSO	10000	NA	NA
CCT196969	pan-RAF.Src inhibitor	RAF1;BRAF;SRC;LCK	B.Kinase inhibitor	Probe	DMSO	25000	NA	NA
Gilteritinib	FLT3.AXL inhibitor	FLT3	B.Kinase inhibitor	Investigational (Ph 2)	DMSO	1000	NA	NA
ARV-825	BET-targeting PROTAC	BRD4	E.Differentiating.epigenetic modifier	Probe	DMSO	300	NA	NA
dBET1	BET-targeting PROTAC	BRD4	E.Differentiating.epigenetic modifier	Probe	DMSO	10000	NA	NA
A-1331852	Bcl-XL inhibitor	BCL2L1;BCL2;BCL2L2;MCL1	G.Apoptotic modulator	Probe	DMSO	1000	NA	NA
A-1155463	Bcl-XL inhibitor	BCL2L1;BCL2;BCL2L2	G.Apoptotic modulator	Probe	DMSO	10000	NA	NA
Ivosidenib	IDH1 R132H.R132C inhibitor	IDH1	E.Differentiating.epigenetic modifier	Investigational (Ph 3)	DMSO	10000	NA	NA
Peficitinb	JAK3-selective inhibitor	JAK1;JAK2;JAK3;TYK2	B.Kinase inhibitor	Investigational (Ph 3)	DMSO	2500	NA	NA
DEL-22379	ERK dimerization inhibitor	MAPK1;MAPK3	B.Kinase inhibitor	Probe	DMSO	50000	NA	NA
AMG319	PI3K delta inhibitor	PIK3CD	B.Kinase inhibitor	Investigational (Ph 2)	DMSO	1000	NA	NA
TIC10	ERK & AKT inhibitor, TRAIL inducer	MAPK1;MAPK3;AKT1;AKT2;AKT3	X.Other	Investigational (Ph 2)	DMSO	25000	NA	NA
ABC294640	Sphingosine kinase 2 inhibitor	SPHK2	B.Kinase inhibitor	Investigational (Ph 2)	DMSO	50000	NA	NA
Radotinib	ABL, PDGFR inhibitor	ABL1;PDGFRA;PDGFRB	B.Kinase inhibitor	Investigational (Ph 3)	DMSO	10000	NA	NA
Ripasudil	ROCK inhibitor	ROCK1	B.Kinase inhibitor	Approved (Japan)	DMSO	10000	NA	NA
CC-223	mTOR inhibitor	MTOR;CSF1R	B.Kinase inhibitor	Investigational (Ph 2)	DMSO	10000	NA	NA
CC-115	mTOR.DNA-PK inhibitor	MTOR;PIK3CA;PRKDC	B.Kinase inhibitor	Investigational (Ph 1)	DMSO	10000	NA	NA
OTS-964	TOPK inhibitor	PBK	B.Kinase inhibitor	Probe	DMSO	2500	NA	NA
RO5126766	dual RAF.MEK inhibitor	RAF1;BRAF;MAP2K1;MAP2K2	B.Kinase inhibitor	Investigational (Ph 1)	DMSO	1000	NA	NA
TGR-1202	PI3Kdelta inhibitor	PIK3CD	B.Kinase inhibitor	Investigational (Ph 3)	DMSO	2500	NA	NA
Litronesib	Eg5 inhibitor	KIF11	I.Kinesin inhibitor	Investigational (Ph 2)	DMSO	1000	NA	NA
AZD6738	ATR inihibitor	ATR	B.Kinase inhibitor	Investigational (Ph 1)	DMSO	25000	NA	NA
ODM-201	AR antagonist	AR	F.Hormone therapy	Investigational (Ph 3)	DMSO	2500	NA	NA
NVP-CGM097	p53-MDM2 inhibitor	MDM2;TP53	G.Apoptotic modulator	Investigational (Ph 1)	DMSO	25000	NA	NA
Entrectinib	TRK, ROS1, ALK inhibitor	ALK;NTRK2;NTRK1;NTRK3;ROS1;TNK2;JAK2	B.Kinase inhibitor	Investigational (Ph 2)	DMSO	1000	NA	NA
LY3023414	PI3K.mTOR.DNA-PK inhibitor	PIK3CA;PIK3CB;PIK3CD;PIK3CG;MTOR;PRKDC	B.Kinase inhibitor	Investigational (Ph 2)	DMSO	2500	NA	NA
Tirabrutinib	BTK inhibitor	BTK	B.Kinase inhibitor	Investigational (Ph 1)	DMSO	1000	NA	NA
Resatorvid	TLR4 inhibitor	TLR4	D.Immunomodulatory	Investigational (Ph 3)	DMSO	10000	NA	NA
Resiquimod	TLR7.TLR8 agonist	TLR7	D.Immunomodulatory	Investigational (Ph 2)	DMSO	10000	NA	NA
Motolimod	TLR8 agonist	TLR8	D.Immunomodulatory	Investigational (Ph 2)	DMSO	10000	NA	NA
THZ2	CDK7 inhibitor	CDK7	B.Kinase inhibitor	Probe	DMSO	10000	NA	NA
Glesatinib	MET, AXL, TIE, VEGFR, RON inhibitor	MET;MST1R;KDR;FLT4;TEK	B.Kinase inhibitor	Investigational (Ph 2)	DMSO	2500	YRCHYHRCBXNYNU-UHFFFAOYSA-N	NA
Sitravatinib	RET, TRK, PDGFR, VEGFR, KIT, DDR...inhibitor	DDR2;RET;KIT;EPHA3;AXL;MERTK;NTRK1;FLT1;FLT3;FLT4;KDR;NTRK2;EPHB2;EPHB4;MST1R;RET;PDGFRA;DDR1;EPHA2;EPHA4;SRC;ROS1	B.Kinase inhibitor	Investigational (Ph 1)	DMSO	2500	WLAVZAAODLTUSW-UHFFFAOYSA-N	NA
Lifirafenib (BGB-283)	Raf inhibitor	RAF1;BRAF;EGFR	B.Kinase inhibitor	Investigational (Ph 1)	DMSO	10000	NA	NA
Asciminib	Allosteric ABL inhibitor, blocks myristoyl binding	ABL1	B.Kinase inhibitor	Investigational (Ph 1)	DMSO	1000	NA	NA
Eribulin	Mitotic inhibitor, microtubule depolymerizer	TUBB1	A.Conv.Chemo	Approved	DMSO	1000	UFNVPOGXISZXJD-JBQZKEIOSA-N	CHEMBL1683590
Brigatinib	ALK inhibitor, including gatekeeper mutant ALK	ALK;ROS1;IGF1R;EGFR;INSR;ABL1;FLT3;MET;ERBB2;ERBB4	B.Kinase inhibitor	Approved (US)	DMSO	1000	AILRADAXUVEEIR-UHFFFAOYSA-N	NA
Selonsertib	ASK1 inhibitor	MAP3K5	B.Kinase inhibitor	Investigational (Ph 2)	DMSO	1000	NA	NA
Pirfenidone	Antifibrotic and anti-inflammatory	TGFB1;FURIN	D.Immunomodulatory	Approved	DMSO	10000	NA	NA
CPI-0610	BET family inhibitor	BRD2;BRD3;BRD4	E.Differentiating.epigenetic modifier	Investigational (Ph 1)	DMSO	10000	NA	NA
CPI-360	EZH2 inhibitor	EZH2	E.Differentiating.epigenetic modifier	Probe	DMSO	10000	NA	NA
Serabelisib	PI3K alpha selective inhibitor	PIK3CA	B.Kinase inhibitor	Investigational (Ph 2)	DMSO	10000	NA	NA
NVP-SHP099	SHP2 inhibitor	PTPN11	X.Other	Probe	DMSO	10000	NA	NA
Olmutinib	EGFR(L858R.T790M) inhibitor	EGFR;BTK	B.Kinase inhibitor	Investigational (Ph 2)	DMSO	1000	NA	NA
Altiratinib	MET.Tie-2 inhibitor	MET;NTRK1;NTRK3;NTRK2;TEK;FLT3;KIT;KDR	B.Kinase inhibitor	Investigational (Ph 1)	DMSO	10000	NA	NA
AZD0156	ATM inhibitor	ATM	B.Kinase inhibitor	Investigational (Ph 1)	DMSO	1000	NA	NA
Acalabrutinib	BTK inhibitor	BTK	B.Kinase inhibitor	Investigational (Ph 3)	DMSO	1000	NA	NA
Trifluridine	Antimetabolite; Nucleoside analog	TYMS	A.Conv.Chemo	Approved	DMSO	10000	NA	NA
AZD3759	EGFR inhibitor, BBB penetrable	EGFR	B.Kinase inhibitor	Investigational (Ph 2)	DMSO	1000	NA	NA
Salinomycin	Ionophore	ABCB1	X.Other	Veterinary approval	DMSO	50000	KQXDHUJYNAXLNZ-XQSDOZFQSA-N	ChEMBL1208572
Mivebresib	BET family inhibitor	BRD2;BRD3;BRD4	E.Differentiating.epigenetic modifier	Investigational (Ph 1)	DMSO	10000	NA	NA
VLX1570	Proteasome deubiquitinase inhibitor	USP14	L.Protease.proteasome inhibitor	Investigational (Ph 2)	DMSO	10000	NA	NA
A-366	G9a.GLP inhibitor	EHMT2	E.Differentiating.epigenetic modifier	Probe	DMSO	25000	NA	NA
LY-2584702	p70S6K inhibitor	RPS6KB1	B.Kinase inhibitor	Investigational (Ph 1)	DMSO	10000	NA	NA
Taladegib	Smothened (Hh) inhibitor	SMO	M.Hedgehog inhibitor	Investigational (Ph 2)	DMSO	10000	NA	NA
Acitretin	Retinoic acid receptor agonist	RARA;RARB;RXRA;RXRB;RXRG	E.Differentiating.epigenetic modifier	Approved (non-oncology)	DMSO	10000	IHUNBGSDBOWDMA-AQFIFDHZSA-N	CHEMBL1131
NVP-BHG712	EphB4 inhibitor	EPHB4	B.Kinase inhibitor	Probe	DMSO	10000	NA	NA
Necrostatin_2	Necroptosis inhibitor	RIPK1	G.Apoptotic modulator	Probe	DMSO	10000	NA	NA
Tucidinostat	HDAC1.2.3.10 inhibitor	HDAC1;HDAC2;HDAC3;HDAC10	E.Differentiating.epigenetic modifier	Investigational (Ph 2)	DMSO	10000	NA	NA
Vesatolimod	TLR7 agonist	TLR7	D.Immunomodulatory	Investigational (Ph 2)	DMSO	10000	NA	NA
AMG-337	MET inhibitor	MET	B.Kinase inhibitor	Investigational (Ph 2)	DMSO	10000	NA	NA
Vidofludimus	DHODH inhibitor	DHODH	E.Differentiating.epigenetic modifier	Investigational (Ph 2)	DMSO	10000	NA	NA
ML390	DHODH inhibitor	DHODH	E.Differentiating.epigenetic modifier	Probe	DMSO	50000	NA	NA
E7820	Integrin alpha2 expression inhibitor	ITGA2	X.Other	Investigational (Ph 2)	DMSO	50000	NA	NA
JPH203	LAT1 inhibitor	SLC7A5	X.Other	Probe	DMSO	5000	NA	NA
GDC-0084	PI3K.mTOR inhibitor	PIK3CA;PIK3CB;PIK3CD;PIK3CG;MTOR	B.Kinase inhibitor	Investigational (Ph 1)	DMSO	10000	NA	NA
PF06650833	IRAK4 inhibitor	IRAK4	B.Kinase inhibitor	Investigational (Ph 2)	DMSO	10000	NA	NA
Avadomide (CC122)	IMiD immunomodulator	CRBN	D.Immunomodulatory	Investigational (Ph 2)	DMSO	10000	NA	NA
Amcasertib	Cancer stem cell kinase inhibitor	NANOG	B.Kinase inhibitor	Investigational (Ph 2)	DMSO	10000	NA	NA
Eltanexor	XPO1.CRM1 inhibitor	XPO1	G.Apoptotic modulator	Investigational (Ph 2)	DMSO	10000	NA	NA
PIM-447	PIM1, 2, 3 kinase inhibitor	PIM1	B.Kinase inhibitor	Investigational (Ph 1)	DMSO	10000	NA	NA
EPZ031686	SMYD3 inhibitor	SMYD3	E.Differentiating.epigenetic modifier	Probe	DMSO	10000	NA	NA
Vinflunine	Mitotic inhibitor, Vinca alkaloid microtubule depolymerizer	TUBB	A.Conv.Chemo	Approved	DMSO	1000	NMDYYWFGPIMTKO-KLCPSUAYSA-N	CHEMBL2110725
Ensartinib	ALK inhibitor	ALK;MET;NTRK1;NTRK3;ROS1	B.Kinase inhibitor	Investigational (Ph 3)	DMSO	1000	NA	NA
GSK2256098	FAK inhibitor	PTK2	B.Kinase inhibitor	Investigational (Ph 2)	DMSO	1000	NA	NA
GDC-0853	BTK inhibitor	BTK	B.Kinase inhibitor	Investigational (Ph 2)	DMSO	1000	NA	NA
Erdafitinib	FGFR inhibitor	FGFR1;FGFR2;FGFR3;FGFR4	B.Kinase inhibitor	Investigational (Ph 2)	DMSO	1000	NA	NA
Larotrectinib	TRK inhibitor	NTRK1	B.Kinase inhibitor	Investigational (Ph 2)	DMSO	1000	PXHANKVTFWSDSG-QLOBERJESA-N	NA
Senexin_B	CDK8.19 inhibitor	CDK8;CDK19	B.Kinase inhibitor	Probe	DMSO	1000	NA	NA
BAY-1436032	IDH1 R132H.R132C inhibitor	IDH1	E.Differentiating.epigenetic modifier	Investigational (Ph 1)	DMSO	10000	NA	NA
Saridegib	Smothened (Hh) inhibitor	SMO	M.Hedgehog inhibitor	Investigational (Ph 2)	DMSO	10000	NA	NA
Upadacitinib	JAK1-selective inhibitor	JAK1;JAK2	B.Kinase inhibitor	Investigational (Ph 3)	DMSO	10000	NA	NA
S-63845	MCL-1 inhibitor	MCL1	G.Apoptotic modulator	Probe	DMSO	1000	NA	NA
Erastin	VDAC inhibitor, induces ferroptosis	VDAC2	H.Metabolic modifier	Probe	DMSO	10000	NA	NA
RSL3	GPX4 inhibitor, induces ferroptosis	GPX4	H.Metabolic modifier	Probe	DMSO	10000	NA	NA
