# Supplementary material for: Multi-omics molecular phenotyping of childhood acute lymphoblastic leukemia cell lines reveals novel drug vulnerabilities
Source: Research Square preprint supplement (doi:10.21203/rs.3.rs-443839/v1), 2021-04-29
Supplement: Supplementary file 12 [file 5ad18689ea42183dc1f17a23.xlsx]

## Sheet: Supp_Table_3
Supplementary Table 3: RNA-seq samples quality control and mapping statistics
Sample	Cell_Line	Type	Age	Gender	RNA_seq_batch	total_reads	avg_input_read_length	uniquely_mapped	uniquely_mapped_percent	avg_mapped_read_length	num_splices	num_annotated_splices	num_GTAG_splices	num_GCAG_splices	num_ATAC_splices	num_noncanonical_splices	mismatch_rate	deletion_rate	deletion_length	insertion_rate	insertion_length	multimapped	multimapped_percent	multimapped_toomany	multimapped_toomany_percent	unmapped_mismatches_percent	unmapped_tooshort_percent	unmapped_other_percent	unmapped_mismatches	unmapped_tooshort	unmapped_other
P10201_101_S38_map	380	BCP-ALL	15	M	B1	35723575	296	33809709	94.64	295.1	18098786	17862884	17898330	140767	18263	41426	0.27	0.02	1.38	0.01	1.66	890764	2.49	12502	0.03	0	2.79	0.04	0	996316	14284
P10201_102_S39_map	697	BCP-ALL	12	M	B1	33677563	295	31121897	92.41	294.89	24161939	23940050	23933285	169672	25189	33793	0.27	0.02	1.28	0.01	1.64	1025659	3.05	13580	0.04	0	4.47	0.03	0	1506317	10110
P10201_103_S40_map	A3	T-ALL	14	M	B1	33232146	296	30751290	92.53	295.33	25006062	24726817	24739084	195648	32751	38579	0.28	0.03	1.56	0.01	1.62	972502	2.93	9068	0.03	0	4.48	0.03	0	1489313	9973
P10201_104_S41_map	ALL-PO	BCP-ALL	0.33	F	B1	34804596	295	32310561	92.83	294.62	19022508	18800053	18828266	137617	19646	36979	0.27	0.02	1.33	0.01	1.65	941933	2.71	15661	0.04	0	4.37	0.05	0	1519060	17381
P10201_105_S42_map	ALL-SIL	T-ALL	17	M	B1	35237073	294	31795227	90.23	293.06	22719016	22434471	22491681	160475	23492	43368	0.26	0.02	1.41	0.01	1.69	1448687	4.11	34778	0.1	0	5.48	0.07	0	1933681	24700
P10201_106_S43_map	CCRF-CEM	T-ALL	4	F	B1	36919428	295	34287005	92.87	294.19	23154336	22873595	22917017	172505	25281	39533	0.27	0.02	1.4	0.01	1.65	1111567	3.01	15418	0.04	0	4.04	0.04	0	1490679	14759
P10201_107_S44_map	CCRF-SB	EBV	11.5	M	B1	35757153	295	33097814	92.56	294.35	23300213	23048068	23061172	177520	24870	36651	0.26	0.02	1.25	0.01	1.69	1417560	3.96	12545	0.04	0	3.38	0.06	0	1207794	21440
P10201_108_S45_map	COG-LL-317	T-ALL	1.7	M	B1	38598030	295	36000429	93.27	294.36	19697414	19425839	19481682	147447	20505	47780	0.28	0.02	1.41	0.02	1.36	1024587	2.65	17035	0.04	0	3.98	0.05	0	1536674	19305
P10201_109_S46_map	COG-LL-319h	BCP-ALL	13	F	B1	46535610	296	44036594	94.63	295.25	22587610	22252704	22331365	180758	23957	51530	0.32	0.02	1.39	0.01	1.69	1100613	2.37	17655	0.04	0	2.93	0.04	0	1362152	18596
P10201_110_S47_map	COG-LL-332h	T-ALL	10	M	B1	47308997	295	42589226	90.02	293.91	32352676	31946198	32021432	240107	36707	54430	0.31	0.02	1.37	0.01	1.67	1432835	3.03	33698	0.07	0	6.82	0.06	0	3224867	28371
P10201_111_S48_map	COG-LL-355h	BCP-ALL	-	M	B1	50076288	296	46930281	93.72	295.23	17754289	17416334	17538125	139960	15268	60936	0.34	0.02	1.44	0.01	1.75	1284531	2.57	16740	0.03	0	3.63	0.06	0	1814740	29996
P10201_112_S49_map	COG-LL-356h	EBV	-	M	B1	39874726	295	36022646	90.34	293.91	23516699	23227989	23266856	179383	22772	47688	0.31	0.02	1.34	0.01	1.68	1740385	4.36	13368	0.03	0	5.21	0.05	0	2078381	19946
P10201_113_S50_map	DND-41	T-ALL	13	M	B1	41389706	292	37796729	91.32	290.96	25351605	24999744	25080169	192700	29406	49330	0.3	0.02	1.59	0.01	1.73	1514360	3.66	33324	0.08	0	4.82	0.12	0	1995610	49683
P10201_114_S51_map	HAL-01	BCP-ALL	17	F	B1	39452249	295	36178519	91.7	294.07	27268290	26981119	27001150	196485	28702	41953	0.3	0.02	1.29	0.01	1.66	1369557	3.47	15801	0.04	0	4.75	0.04	0	1872603	15769
P10201_115_S52_map	HPB-ALL	T-ALL	14	M	B1	47910650	295	44919836	93.76	294.55	36037445	35503487	35668487	270195	40597	58166	0.29	0.02	1.49	0.01	1.68	1543634	3.22	15674	0.03	0	2.95	0.04	0	1412355	19151
P10201_116_S53_map	JURKAT	T-ALL	14	M	B1	39617138	294	37262190	94.06	294.07	29808470	29456138	29505024	222568	35289	45589	0.3	0.03	1.59	0.01	1.65	1244102	3.14	14533	0.04	0	2.74	0.03	0	1084440	11873
P10201_117_S54_map	KARPAS-45	T-ALL	2	M	B1	38590545	296	35123711	91.02	294.82	22994339	22654574	22753596	173146	25031	42566	0.3	0.03	1.33	0.01	1.67	1261587	3.27	11162	0.03	0	5.64	0.04	0	2178634	15451
P10201_118_S55_map	KASUMI-2	BCP-ALL	15	M	B1	53779120	295	50138748	93.23	295.1	35481620	35043881	35131455	260302	34659	55204	0.28	0.02	1.35	0.01	1.68	1858433	3.46	20614	0.04	0	3.24	0.04	0	1739845	21480
P10201_119_S56_map	KASUMI-9	BCP-ALL	19	M	B1	46056338	295	39325326	85.39	294.57	25561811	25222266	25297673	194062	26327	43749	0.3	0.02	1.45	0.01	1.42	4914956	10.67	32403	0.07	0	3.84	0.04	0	1765265	18388
P10201_120_S57_map	KOPN-8	BCP-ALL	0.25	F	B1	42543849	295	38941944	91.53	294	26593436	26256987	26331940	194280	26593	40623	0.28	0.02	1.3	0.02	1.3	1690639	3.97	18059	0.04	0	4.41	0.04	0	1876189	17018
P10201_121_S58_map	LC4-1	BCP-ALL	13	F	B1	50815617	294	46993104	92.48	293.49	33464652	33085827	33138340	246641	29929	49742	0.27	0.02	1.47	0.01	1.7	2500468	4.92	26229	0.05	0	2.51	0.04	0	1275489	20327
P10201_122_S59_map	MHH-CALL-2	BCP-ALL	15	F	B1	41396364	295	37789064	91.29	294.97	25312144	25023854	25063519	182234	25413	40978	0.3	0.02	1.29	0.01	1.7	2430761	5.87	15245	0.04	0	2.77	0.03	0	1148852	12442
P10201_123_S60_map	MHH-CALL-3	BCP-ALL	11	F	B1	41822808	294	38850675	92.89	294.04	21490813	21162512	21263245	164106	21682	41780	0.28	0.02	1.3	0.01	1.68	1599783	3.83	22233	0.05	0	3.18	0.05	0	1329217	20900
P10201_124_S61_map	MHH-CALL-4	BCP-ALL	10	M	B1	50049384	295	47264577	94.44	294.53	26229199	25883983	25953848	198839	23198	53314	0.29	0.03	1.21	0.01	1.67	1442210	2.88	14067	0.03	0	2.62	0.03	0	1313490	15040
P10201_125_S62_map	MN-60	B-ALL	20	M	B1	45055122	296	42139655	93.53	295.66	27562622	27230256	27277657	208824	25563	50578	0.27	0.03	1.33	0.01	1.74	1503879	3.34	18846	0.04	0	3.05	0.04	0	1374713	18029
P10201_126_S63_map	MOLT-13	T-ALL	2	F	B1	52879339	294	49183432	93.01	293.57	23334522	22936967	23076163	171504	25014	61841	0.27	0.02	1.38	0.01	1.71	1793687	3.39	89768	0.17	0	3.34	0.09	0	1764895	47557
P10201_127_S64_map	MOLT-16	T-ALL	5	F	B1	48307712	295	44217018	91.53	294.93	31475648	31124733	31164897	229053	34077	47621	0.27	0.02	1.45	0.01	1.71	2885838	5.97	19042	0.04	0	2.43	0.03	0	1171353	14461
P10201_128_S65_map	MOLT-3	T-ALL	19	M	B1	37124717	295	33887669	91.28	294.94	23481947	23160313	23246693	167137	26281	41836	0.28	0.02	1.57	0.01	1.74	1708944	4.6	18116	0.05	0	4.02	0.05	0	1491438	18550
P10201_129_S66_map	MOLT-4	T-ALL	19	M	B1	47244417	294	41931076	88.75	293.04	28910435	28506585	28621308	202818	30749	55560	0.27	0.03	1.47	0.01	1.71	2562425	5.42	23977	0.05	0	5.73	0.04	0	2708035	18904
P10201_130_S67_map	NALL-1	BCP-ALL	14	M	B1	46506380	294	42807846	92.05	294.12	29531934	29140156	29225614	229185	28999	48136	0.27	0.02	1.48	0.01	1.7	2241719	4.82	42743	0.09	0	2.99	0.05	0	1390814	23258
P10201_131_S68_map	NALM-16	BCP-ALL	12	F	B1	44728219	294	41627923	93.07	293.81	26629780	26300705	26358110	199302	26865	45503	0.27	0.02	1.22	0.01	1.67	1612068	3.6	14008	0.03	0	3.26	0.03	0	1460777	13443
P10201_132_S69_map	NALM-6	BCP-ALL	19	M	B1	41988291	295	38573873	91.87	294.23	25655576	25358721	25391888	192983	27950	42755	0.26	0.03	1.63	0.01	1.73	1642956	3.91	15700	0.04	0	4.14	0.04	0	1738960	16802
P10201_133_S70_map	P12-ICHIKAWA	T-ALL	7	M	B1	41186738	294	38068497	92.43	293.97	25250169	24928960	24984668	188213	27784	49504	0.31	0.02	1.44	0.01	1.78	1719918	4.18	27285	0.07	0	3.23	0.09	0	1333871	37167
P10201_134_S71_map	P30-OHKUBO	BCP-ALL	11	F	B1	48984595	295	44387886	90.62	294.38	31859228	31490040	31535164	239908	32474	51682	0.31	0.03	1.34	0.01	1.66	2069263	4.22	20719	0.04	0	5.08	0.03	0	2492010	14717
P10201_135_S72_map	PEER	T-ALL	4	F	B1	38260456	295	32748846	85.59	294.55	24213644	23926772	23980459	166530	26842	39813	0.3	0.02	1.31	0.01	1.74	3784339	9.89	71777	0.19	0	4.27	0.06	0	1632554	22940
P10201_136_S73_map	PF-382	T-ALL	6	F	B1	47359225	294	43640730	92.15	293.94	31201911	30804558	30888058	226216	34170	53467	0.29	0.02	1.46	0.01	1.71	2095397	4.42	18627	0.04	0	3.35	0.04	0	1585539	18932
P10201_137_S74_map	RCH-ACV	BCP-ALL	8	F	B1	40665205	293	37017537	91.03	292.93	26757682	26481417	26499679	189228	27494	41281	0.28	0.02	1.3	0.01	1.65	2110915	5.19	19649	0.05	0	3.69	0.04	0	1500835	16269
P10201_138_S75_map	REH	BCP-ALL	15	F	B1	47604947	295	43650915	91.69	294.86	33885235	33504671	33551485	245024	35512	53214	0.28	0.03	1.47	0.01	1.71	2436143	5.12	18668	0.04	0	3.12	0.03	0	1484943	14278
P10201_139_S76_map	REH_BR2	BCP-ALL	15	F	B1	47785989	294	43599074	91.24	294.29	29377674	28940144	29064884	230396	30803	51591	0.29	0.03	1.48	0.01	1.66	2559615	5.36	22813	0.05	0	3.32	0.04	0	1585386	19101
P10201_140_S77_map	RPMI-8402	T-ALL	16	F	B1	41560311	295	38012165	91.46	294.29	26649649	26310291	26376933	200670	28189	43857	0.28	0.02	1.4	0.01	1.67	1699211	4.09	16646	0.04	0	4.36	0.04	0	1815632	16657
P10201_141_S78_map	SEM	BCP-ALL	5	F	B1	46999043	295	43612522	92.79	295.11	31075663	30732188	30760727	235593	30953	48390	0.24	0.03	1.36	0.01	1.67	1493210	3.18	11973	0.03	0	3.98	0.02	0	1871931	9407
P10201_142_S79_map	SEM_BR2	BCP-ALL	5	F	B1	53173702	294	49268485	92.66	293.89	35187954	34778233	34827971	270137	34286	55560	0.24	0.03	1.36	0.01	1.69	1991444	3.75	14069	0.03	0	3.55	0.03	0	1883785	15919
P10201_144_S81_map	SUP-B15	BCP-ALL	9	M	B1	44244924	293	39457063	89.18	293.07	28457249	28118150	28176595	209458	28548	42648	0.24	0.02	1.43	0.01	1.71	2317215	5.24	17038	0.04	0	5.5	0.04	0	2435892	17716
P10201_145_S82_map	TALL-104	T-ALL	2	M	B1	47888165	293	44073537	92.03	292.38	16753362	16447710	16561807	123328	15157	53070	0.27	0.02	1.54	0.01	1.72	1827293	3.82	26370	0.06	0	4.02	0.07	0	1927403	33562
P10201_146_S83_map	TANOUE	B-ALL	11	M	B1	46254580	294	41381087	89.46	293.72	35496291	34959775	35102088	268298	40915	84990	0.26	0.03	1.51	0.01	1.63	2405595	5.2	19736	0.04	0	5.25	0.04	0	2429650	18512
P10201_147_S84_map	TMD5	BCP-ALL	19	M	B1	46319604	294	42125168	90.94	294.23	26955861	26589976	26682409	201689	23218	48545	0.27	0.02	1.48	0.01	1.7	2642752	5.71	21785	0.05	0	3.25	0.05	0	1506719	23180
SD-2137-697-R2_S1_map	697_BR2	BCP-ALL	12	M	B2	105588158	289	97756403	92.58	289.25	86833869	86028041	85996316	602748	82613	152192	0.19	0.01	1.94	0.01	1.64	4853283	4.6	74661	0.07	0	2.71	0.04	0	2861574	42237
SD-2137-ALL-PO-R2_S2_map	ALL-PO_BR2	BCP-ALL	0.33	F	B2	150577126	283	132669208	88.11	282.89	104267775	103118455	103289533	707096	97333	173813	0.19	0.01	1.93	0.01	1.62	8003530	5.32	132255	0.09	0	6.43	0.06	0	9681790	90343
SD-2137-BE-13_S3_map	BE-13	T-ALL	4	F	B2	116860637	285	102922102	88.07	284.59	76063358	75005888	75287821	523350	69753	182434	0.19	0.01	2.03	0.01	1.68	7196561	6.16	569911	0.49	0	5.01	0.27	0	5856446	315617
SD-2137-CCRF-HSB2_S4_map	CCRF-HSB2	T-ALL	11.5	M	B2	113165828	280	101774540	89.93	279.76	63139584	62210227	62428189	483673	62692	165030	0.19	0.02	1.93	0.01	1.75	6368212	5.63	75945	0.07	0	4.27	0.11	0	4822888	124243
SD-2137-COG-LL-319h-R2_S5_map	COG-LL-319h_BR2	BCP-ALL	13	F	B2	110878384	275	101854999	91.86	275.31	73495436	72501209	72711271	552100	72951	159114	0.18	0.01	1.98	0.01	1.65	5659409	5.1	62033	0.06	0	2.93	0.05	0	3246541	55402
SD-2137-COG-LL-355h-R2_S6_map	COG-LL-355h_BR2	BCP-ALL	-	M	B2	102763948	277	92102322	89.63	277.2	60191853	59277883	59553470	446972	48793	142618	0.19	0.01	1.99	0.01	1.7	5579242	5.43	67634	0.07	0	4.82	0.06	0	4953093	61657
SD-2137-COG-LL-394h_S7_map	COG-LL-394h	BCP-ALL	-	F	B2	87146481	277	80534391	92.41	277.13	57602877	56781469	57041134	416205	57991	87547	0.19	0.01	1.94	0.01	1.85	4937595	5.67	41820	0.05	0	1.83	0.04	0	1597751	34924
SD-2137-COG-LL-402h_S8_map	COG-LL-402h	BCP-ALL	-	M	B2	159717292	277	141236105	88.43	276.56	96967918	95642811	95953490	720808	93807	199813	0.2	0.01	2.04	0.01	1.67	8518948	5.33	90327	0.06	0	6.11	0.07	0	9760094	111818
SD-2137-KASUMI-10_S9_map	KASUMI-10	BCP-ALL	0.5	F	B2	146000426	277	132302834	90.62	277.66	78577336	77498953	77679858	574909	74675	247894	0.2	0.01	2.05	0.01	1.63	10288676	7.05	96956	0.07	0	2.22	0.05	0	3239009	72951
SD-2137-KASUMI-2-R2_S10_map	KASUMI-2_BR2	BCP-ALL	15	M	B2	76880455	281	68353765	88.91	281	56299605	55654201	55743237	398242	50498	107628	0.19	0.01	1.92	0.01	1.69	4408702	5.73	49187	0.06	0	5.23	0.06	0	4022652	46149
SD-2137-KASUMI-9-R2_S11_map	KASUMI-9_BR2	BCP-ALL	19	M	B2	136470174	279	123842349	90.75	279.19	79374232	78232692	78503339	591310	79157	200426	0.21	0.01	1.99	0.01	1.73	7250217	5.31	133140	0.1	0	3.7	0.14	0	5053263	191205
SD-2137-LC4-1-R2_S12_map	LC4-1_BR2	BCP-ALL	13	F	B2	98664020	280	89515342	90.73	280.04	68825080	68040134	68120333	518505	61326	124916	0.19	0.01	1.97	0.01	1.67	5165088	5.24	53863	0.05	0	3.94	0.05	0	3880482	49245
SD-2137-MOLT-14_S13_map	MOLT-14	T-ALL	2	F	B2	110879343	282	101064421	91.15	282.03	74556129	73577097	73785658	537767	68603	164101	0.19	0.01	1.9	0.01	1.7	5082724	4.58	93958	0.08	0	4.12	0.06	0	4571662	66578
SD-2137-MOLT-17_S14_map	MOLT-17	T-ALL	5	F	B2	105848005	268	92223833	87.13	267.29	68511708	67684752	67805291	498414	70847	137156	0.19	0.01	1.88	0.01	1.67	6141086	5.8	71981	0.07	0	6.91	0.09	0	7315819	95286
SD-2137-NALL-1-R2_S15_map	NALL-1_BR2	BCP-ALL	14	M	B2	125529554	265	114298989	91.05	264.54	40801710	39994336	40292728	325882	37492	145608	0.2	0.01	1.98	0.01	1.67	6402474	5.1	207308	0.17	0	3.53	0.15	0	4432436	188347
SD-2137-P30-OHKUBO-R2_S16_map	P30-OHKUBO_BR2	BCP-ALL	11	F	B2	119303486	279	110722554	92.81	279.68	86510002	85452854	85642715	635821	79266	152200	0.19	0.01	1.93	0.01	1.63	5501381	4.61	82015	0.07	0	2.47	0.04	0	2949767	47769
SD-2137-RCH-ACV-R2_S17_map	RCH-ACV_BR2	BCP-ALL	8	F	B2	113428924	275	103210175	90.99	275.19	71815125	70959534	71063477	536795	68448	146405	0.18	0.01	1.92	0.01	1.66	6309770	5.56	89761	0.08	0	3.3	0.07	0	3739887	79331
SH-2290-KOPN-8-R2_S85_map	KOPN-8_BR2	BCP-ALL	0.25	F	B3	63918259	271	55659073	87.08	270.78	38374524	37840507	37991867	279996	38939	63722	0.18	0.01	1.92	0.01	1.62	4237412	6.63	44560	0.07	0	6.16	0.06	0	3938849	38365
SH-2290-SUP-B15-R2_S83_map	SUP-B15_BR2	BCP-ALL	9	M	B3	72878840	271	60936987	83.61	269.32	34299939	33785162	33949008	252843	31697	66391	0.18	0.01	1.93	0.01	1.61	5094827	6.99	48280	0.07	0	9.24	0.08	0	6740388	58358
SH-2290-TMD5-R2_S84_map	TMD5_BR2	BCP-ALL	19	M	B3	62582848	267	53022282	84.72	264.8	12544431	12214078	12378700	99174	11217	55340	0.22	0.02	1.97	0.01	1.59	4570900	7.3	77963	0.12	0	7.7	0.15	0	4817849	93854
