# Supplementary material for: Multi-omics molecular phenotyping of childhood acute lymphoblastic leukemia cell lines reveals novel drug vulnerabilities
Source: Research Square preprint supplement (doi:10.21203/rs.3.rs-443839/v1), 2021-04-29
Supplement: Supplementary file 13 [file 68146b8414a0e19522020083.xlsx]

## Sheet: Supp_Table_1
Supplementary Table 1: Cell Line Panel and feature data
Cell Line Name	TMT10 channel	HiRIEF Set	RNA-seq sample ID	DSRT	Used in Pool	DepMap ID	Type Leukemia	Lineage	Tissue	Age (Y)	Gender	Time	Relapse	Subtype	Subtype.Alt	Collection	Authenticated	Medium	Comment
A3	Set6_tmt10plex_129N	6	P10201_103_S40	-	-	-	lymphoblastic_T_cell_leukemia	T-ALL	PB	14	M	PD	1st	T-Other	Unknown	ATCC	Yes	RPMI.10%FBS	Derived from Jurkat
ALL-PO	Set6_tmt10plex_127C	6	P10201_104_S41	YES	-	ACH-002209	B-Cell Precursor Leukemia	BCP-ALL	BM	0.33	F	Dx	Diagnosis	KMT2A-AFF1	KMT2A-AFF1	BBCF/iclc.it	Yes	RPMI.10%FBS
ALL-PO (BioRep)	Set9_tmt10plex_128N	9	SD.2137.ALL.PO.R2_S2	-	-	ACH-002209	B-Cell Precursor Leukemia	BCP-ALL	BM	0.33	F	Dx	Diagnosis	KMT2A-AFF1	KMT2A-AFF1	BBCF/iclc.it	-	RPMI.10%FBS
ALL-SIL	Set2_tmt10plex_130N	2	P10201_105_S42	-	YES	ACH-000105	lymphoblastic_T_cell_leukemia	T-ALL	BM	17	M	PD	1st	NUP214-ABL1	NUP214-ABL1	DSMZ	Yes	RPMI.10%FBS
ALL-SIL (BioRep)	Set8_tmt10plex_127C	8	-	-	-	ACH-000105	lymphoblastic_T_cell_leukemia	T-ALL	BM	17	M	PD	1st	NUP214-ABL1	NUP214-ABL1	DSMZ	Yes	RPMI.10%FBS
BE-13	Set7_tmt10plex_127N	7	SD.2137.BE.13_S3	-	-	ACH-002216	lymphoblastic_T_cell_leukemia	T-ALL	BM	4	F	PD	2nd	NUP214-ABL1	NUP214-ABL1	DSMZ	Yes	RPMI.10%FBS	Derived from PEER
CCRF-CEM	Set1_tmt10plex_127C	1	P10201_106_S43	-	YES	ACH-001738	lymphoblastic_T_cell_leukemia	T-ALL	PB	4	F	PD	1st	T-Other	SIL-SCL	DSMZ	Yes	RPMI.10%FBS
CCRF-CEM (BioRep)	Set8_tmt10plex_129N	8	-	-	-	ACH-001738	lymphoblastic_T_cell_leukemia	T-ALL	PB	4	F	PD	1st	T-Other	SIL-SCL	DSMZ	-	RPMI.10%FBS
CCRF-HSB2	Set7_tmt10plex_130N	7	SD.2137.CCRF.HSB2_S4	-	-	-	lymphoblastic_T_cell_leukemia	T-ALL	PB	11.5	M	Unknown	-	T-Other	TRB-LCK	DSMZ	Yes	RPMI.10%FBS
CCRF-SB	Set1_tmt10plex_129C	1	P10201_107_S44	No	YES	-	EBV transformed B-cells	EBV	PB	11.5	M	Unknown	-	EBV	EBV	JCRB;ATCC;Sigma	Yes	RPMI.10%FBS	Derived from same patient as CCRF-HSB2
CCRF-SB (BioRep)	Set5_tmt10plex_130N	5	-	-	-	-	EBV transformed B-cells	EBV	PB	11.5	M	Unknown	-	EBV	EBV	JCRB;ATCC;Sigma	Yes	RPMI.10%FBS	Derived from same patient as CCRF-HSB2
COG-LL-317	Set4_tmt10plex_129N	4	P10201_108_S45	-	-	-	lymphoblastic_T_cell_leukemia	T-ALL	BM	1.7	M	PD	1st	T-Other	TRA-MYC	COG	Yes	IMDM.20%FBS
COG-LL-319h	Set5_tmt10plex_128N	5	P10201_109_S46	YES	-	-	B-Cell Precursor Leukemia	BCP-ALL	BM	13	F	Dx	Diagnosis	TCF3-PBX1	TCF3-PBX1	COG	Yes	IMDM.20%FBS
COG-LL-319h (BioRep)	Set10_tmt10plex_127C	10	SD.2137.COG.LL.319h.R2_S5	-	-	-	B-Cell Precursor Leukemia	BCP-ALL	BM	13	F	Dx	Diagnosis	TCF3-PBX1	TCF3-PBX1	COG	Yes	IMDM.20%FBS
COG-LL-332h	Set5_tmt10plex_128C	5	P10201_110_S47	-	-	-	lymphoblastic_T_cell_leukemia	T-ALL	BM	10	M	PD	1st	T-Other	SFPQ-ABL1	COG	Yes	IMDM.20%FBS
COG-LL-332h (BioRep)	Set10_tmt10plex_130C	10	-	-	-	-	lymphoblastic_T_cell_leukemia	T-ALL	BM	10	M	PD	1st	T-Other	SFPQ-ABL1	COG	Yes	IMDM.20%FBS
COG-LL-355h	Set6_tmt10plex_129C	6	P10201_111_S48	YES	-	-	B-Cell Precursor Leukemia	BCP-ALL	BM	-	M	Dx	Diagnosis	ETV6-RUNX1	ETV6-RUNX1	COG	Yes	IMDM.20%FBS
COG-LL-355h (BioRep)	Set8_tmt10plex_130C	8	SD.2137.COG.LL.355h.R2_S6	-	-	-	B-Cell Precursor Leukemia	BCP-ALL	BM	-	M	Dx	Diagnosis	ETV6-RUNX1	ETV6-RUNX1	COG	-	IMDM.20%FBS
COG-LL-356h	Set3_tmt10plex_128N	3	P10201_112_S49	-	-	-	EBV transformed B-cells	EBV	BM	-	M	Dx	Diagnosis	EBV	EBV	COG	Yes	IMDM.20%FBS
COG-LL-356h (BioRep)	Set7_tmt10plex_128C	7	-	-	-	-	EBV transformed B-cells	EBV	BM	-	M	Dx	Diagnosis	EBV	EBV	COG	Yes	IMDM.20%FBS
COG-LL-394h	Set9_tmt10plex_126	9	SD.2137.COG.LL.394h_S7	YES	-	-	B-Cell Precursor Leukemia	BCP-ALL	BM	-	F	PD	-	ABL1-ZMIZ1	ABL1-ZMIZ1	COG	-	IMDM.20%FBS
COG-LL-402h	Set8_tmt10plex_126	8	SD.2137.COG.LL.402h_S8	YES	-	-	B-Cell Precursor Leukemia	BCP-ALL	BM	-	M	Dx	-	TCF3-PBX1	TCF3-PBX1	COG	-	IMDM.20%FBS
DND-41	Set4_tmt10plex_127N	4	P10201_113_S50	-	-	ACH-000981	lymphoblastic_T_cell_leukemia	T-ALL	PB	13	M	Unknown	-	BCL11B-TLX3	BCL11B-TLX3	DSMZ	Yes	RPMI.10%FBS
DND-41 (BioRep)	Set9_tmt10plex_129C	9	-	-	-	ACH-000981	lymphoblastic_T_cell_leukemia	T-ALL	PB	13	M	Unknown	-	BCL11B-TLX3	BCL11B-TLX3	DSMZ	Yes	RPMI.10%FBS
HAL-01	Set4_tmt10plex_128N	4	P10201_114_S51	YES	-	ACH-002241	B-Cell Precursor Leukemia	BCP-ALL	PB	17	F	PD	-	B-Other	TCF3-HLF	DSMZ	Yes	RPMI.10%FBS
HAL-01 (BioRep)	Set10_tmt10plex_130N	10	-	-	-	ACH-002241	B-Cell Precursor Leukemia	BCP-ALL	PB	17	F	PD	-	B-Other	TCF3-HLF	DSMZ	Yes	RPMI.10%FBS
HPB-ALL	Set5_tmt10plex_127N	5	P10201_115_S52	-	-	ACH-000942	lymphoblastic_T_cell_leukemia	T-ALL	PB	14	M	Dx	Diagnosis	BCL11B-TLX3	BCL11B-TLX3	DSMZ	Yes	RPMI.10%FBS
HPB-ALL (BioRep)	Set10_tmt10plex_128N	10	-	-	-	ACH-000942	lymphoblastic_T_cell_leukemia	T-ALL	PB	14	M	Dx	Diagnosis	BCL11B-TLX3	BCL11B-TLX3	DSMZ	Yes	RPMI.10%FBS
JURKAT	Set2_tmt10plex_127N	2	P10201_116_S53	-	-	ACH-000995	lymphoblastic_T_cell_leukemia	T-ALL	PB	14	M	PD	1st	T-Other	Unknown	DSMZ	Yes	RPMI.10%FBS
KARPAS-45	Set6_tmt10plex_128N	6	P10201_117_S54	-	-	ACH-002256	lymphoblastic_T_cell_leukemia	T-ALL	BM	2	M	Dx	Diagnosis	T-Other	KMT2A-FOXO4	ECACC;Sigma	Yes	RPMI.10%FBS
KARPAS-45 (BioRep)	Set10_tmt10plex_128C	10	-	-	-	ACH-002256	lymphoblastic_T_cell_leukemia	T-ALL	BM	2	M	Dx	Diagnosis	T-Other	KMT2A-FOXO4	ECACC;Sigma	Yes	RPMI.10%FBS
KASUMI-10	Set7_tmt10plex_130C	7	SD.2137.KASUMI.10_S9	YES	-	-	B-Cell Precursor Leukemia	BCP-ALL	PB	0.5	F	Dx	-	KMT2A-MLLT1	KMT2A-MLLT1	JCRB	Yes	RPMI.10%FBS
KASUMI-2	Set2_tmt10plex_127C	2	P10201_118_S55	YES	-	ACH-000728	B-Cell Precursor Leukemia	BCP-ALL	BM	15	M	Dx	Diagnosis	TCF3-PBX1	TCF3-PBX1	DSMZ;JCRB	Yes	RPMI.10%FBS
KASUMI-2 (BioRep)	Set8_tmt10plex_128N	8	SD.2137.KASUMI.2.R2_S10	-	-	ACH-000728	B-Cell Precursor Leukemia	BCP-ALL	BM	15	M	Dx	Diagnosis	TCF3-PBX1	TCF3-PBX1	DSMZ;JCRB	Yes	RPMI.10%FBS
KASUMI-9	Set6_tmt10plex_128C	6	P10201_119_S56	YES	-	-	B-Cell Precursor Leukemia	BCP-ALL	PB	19	M	Unknown	-	MEF2D-HNRNPUL1	MEF2D-HNRNPUL1	JCRB	Yes	RPMI.10%FBS
KASUMI-9 (BioRep)	Set10_tmt10plex_127N	10	SD.2137.KASUMI.9.R2_S11	-	-	-	B-Cell Precursor Leukemia	BCP-ALL	PB	19	M	Unknown	-	MEF2D-HNRNPUL1	MEF2D-HNRNPUL1	JCRB	Yes	RPMI.10%FBS
KOPN-8	Set3_tmt10plex_129C	3	P10201_120_S57	YES	YES	ACH-001106	B-Cell Precursor Leukemia	BCP-ALL	PB	0.25	F	Dx	Diagnosis	KMT2A-MLLT1	KMT2A-MLLT1	DSMZ	Yes	RPMI.10%FBS
KOPN-8 (BioRep)	Set7_tmt10plex_127C	7	Sample_SH.2290.KOPN.8.R2	-	-	ACH-001106	B-Cell Precursor Leukemia	BCP-ALL	PB	0.25	F	Dx	Diagnosis	KMT2A-MLLT1	KMT2A-MLLT1	DSMZ	Yes	RPMI.10%FBS
LC4-1	Set3_tmt10plex_129N	3	P10201_121_S58	YES	YES	ACH-002267	B-Cell Precursor Leukemia	BCP-ALL	PB	13	F	Dx	Diagnosis	MEF2D-HNRNPUL1	MEF2D-HNRNPUL1	JCRB	Yes	RPMI.10%FBS
LC4-1 (BioRep)	Set9_tmt10plex_130N	9	SD.2137.LC4.1.R2_S12	-	-	ACH-002267	B-Cell Precursor Leukemia	BCP-ALL	PB	13	F	Dx	Diagnosis	MEF2D-HNRNPUL1	MEF2D-HNRNPUL1	JCRB	Yes	RPMI.10%FBS
MHH-CALL-2	Set3_tmt10plex_127N	3	P10201_122_S59	YES	-	ACH-000020	B-Cell Precursor Leukemia	BCP-ALL	PB	15	F	Dx	Diagnosis	B-Other	PTMA-TMSB4X	DSMZ	Yes	RPMI.20%FBS
MHH-CALL-2 (BioRep)	Set10_tmt10plex_129C	10	-	-	-	ACH-000020	B-Cell Precursor Leukemia	BCP-ALL	PB	15	F	Dx	Diagnosis	B-Other	PTMA-TMSB4X	DSMZ	Yes	RPMI.20%FBS
MHH-CALL-3	Set2_tmt10plex_129C	2	P10201_123_S60	YES	YES	ACH-000032	B-Cell Precursor Leukemia	BCP-ALL	BM	11	F	Dx	Diagnosis	TCF3-PBX1	TCF3-PBX1	DSMZ	Yes	RPMI.20%FBS
MHH-CALL-4	Set5_tmt10plex_129C	5	P10201_124_S61	YES	-	ACH-000156	B-Cell Precursor Leukemia	BCP-ALL	PB	10	M	Dx	Diagnosis	B-Other	IGH-CRLF2	DSMZ	Yes	RPMI.10%FBS
MHH-CALL-4 (BioRep)	Set9_tmt10plex_128C	9	-	-	-	ACH-000156	B-Cell Precursor Leukemia	BCP-ALL	PB	10	M	Dx	Diagnosis	B-Other	IGH-CRLF2	DSMZ	Yes	RPMI.10%FBS
MN-60	Set5_tmt10plex_127C	5	P10201_125_S62	YES	-	ACH-002275	lymphoblastic_B_cell_leukemia	B-ALL	PB	20	M	PD	Partial Remission	IGH-MYC	IGH-MYC	DSMZ	Yes	HAMS.10%FBS
MN-60 (BioRep)	Set8_tmt10plex_127N	8	-	-	-	ACH-002275	lymphoblastic_B_cell_leukemia	B-ALL	PB	20	M	PD	Partial Remission	IGH-MYC	IGH-MYC	DSMZ	Yes	HAMS.10%FBS
MOLT-13	Set4_tmt10plex_129C	4	P10201_126_S63	-	-	ACH-000795	lymphoblastic_T_cell_leukemia	T-ALL	BM	2	F	PD	1st	T-Other	LMO2-STAG2	DSMZ	Yes	RPMI.20%FBS	Derived from same patient as MOLT-14
MOLT-14	Set7_tmt10plex_128N	7	SD.2137.MOLT.14_S13	-	-	-	lymphoblastic_T_cell_leukemia	T-ALL	BM	2	F	PD	1st	T-Other	LMO2-STAG2	DSMZ	Yes	RPMI.10%FBS	Derived from same patient as MOLT-13
MOLT-16	Set3_tmt10plex_127C	3	P10201_127_S64	-	YES	ACH-000918	lymphoblastic_T_cell_leukemia	T-ALL	PB	5	F	PD	1st	T-Other	TRA-MYC	DSMZ	Yes	RPMI.10%FBS	Derived from same patient as MOLT-17
MOLT-17	Set7_tmt10plex_129N	7	SD.2137.MOLT.17_S14	-	-	-	lymphoblastic_T_cell_leukemia	T-ALL	PB	5	F	PD	1st	T-Other	TRA-MYC	DSMZ	Yes	RPMI.10%FBS	Derived from same patient as MOLT-16
MOLT-3	Set1_tmt10plex_130C	1	P10201_128_S65	-	-	ACH-000964	lymphoblastic_T_cell_leukemia	T-ALL	PB	19	M	PD	1st	T-Other	CERS2+/IL32+	ATCC;DSMZ;JCRB	Yes	RPMI.10%FBS	Derived from same patient as MOLT-3
MOLT-4	Set2_tmt10plex_129N	2	P10201_129_S66	-	YES	ACH-001127	lymphoblastic_T_cell_leukemia	T-ALL	PB	19	M	PD	1st	T-Other	CERS2+/IL32+	ATCC;DSMZ	Yes	RPMI.10%FBS	Derived from same patient as MOLT-4
NALL-1	Set6_tmt10plex_127N	6	P10201_130_S67	YES	-	-	B-Cell Precursor Leukemia	BCP-ALL	PB	14	M	PD	1st	PAX5-ETV6	PAX5-ETV6	JCRB	Yes	RPMI.10%FBS
NALL-1 (BioRep)	Set8_tmt10plex_130N	8	SD.2137.-LL.1.R2_S15	-	-	-	B-Cell Precursor Leukemia	BCP-ALL	PB	14	M	PD	1st	PAX5-ETV6	PAX5-ETV6	JCRB	-	RPMI.10%FBS
NALM-16	Set1_tmt10plex_130N	1	P10201_131_S68	YES	-	-	B-Cell Precursor Leukemia	BCP-ALL	PB	12	F	PD	1st	B-Other	BUB1B+	DSMZ	Yes	RPMI.10%FBS
NALM-6	Set2_tmt10plex_128C	2	P10201_132_S69	YES	-	ACH-000938	B-Cell Precursor Leukemia	BCP-ALL	PB	19	M	PD	1st	B-Other	ETV6-PDGFRB	DSMZ	Yes	RPMI.10%FBS
P12-ICHIKAWA	Set1_tmt10plex_128C	1	P10201_133_S70	-	-	ACH-000372	lymphoblastic_T_cell_leukemia	T-ALL	PB	7	M	Unknown	-	T-Other	LMO2	DSMZ	Yes	RPMI.10%FBS
P12-ICHIKAWA (BioRep)	Set9_tmt10plex_129N	9	-	-	-	ACH-000372	lymphoblastic_T_cell_leukemia	T-ALL	PB	7	M	Unknown	-	T-Other	LMO2	DSMZ	Yes	RPMI.10%FBS
P30-OHKUBO	Set1_tmt10plex_129N	1	P10201_134_S71	YES	YES	ACH-002059	B-Cell Precursor Leukemia	BCP-ALL	BM	11	F	PD	3rd	MEF2D-HNRNPUL1	MEF2D-HNRNPUL1	DSMZ;JCRB	Yes	RPMI.10%FBS
P30-OHKUBO (BioRep)	Set8_tmt10plex_128C	8	SD.2137.P30.OHKUBO.R2_S16	-	-	ACH-002059	B-Cell Precursor Leukemia	BCP-ALL	BM	11	F	PD	3rd	MEF2D-HNRNPUL1	MEF2D-HNRNPUL1	DSMZ;JCRB	Yes	RPMI.10%FBS
PEER	Set3_tmt10plex_128C	3	P10201_135_S72	-	-	ACH-000519	lymphoblastic_T_cell_leukemia	T-ALL	BM	4	F	PD	2nd	NUP214-ABL1	NUP214-ABL1	DSMZ;JCRB	Yes	RPMI.10%FBS
PEER (BioRep)	Set9_tmt10plex_127C	9	-	-	-	ACH-000519	lymphoblastic_T_cell_leukemia	T-ALL	BM	4	F	PD	2nd	NUP214-ABL1	NUP214-ABL1	DSMZ;JCRB	Yes	RPMI.10%FBS
PF-382	Set3_tmt10plex_130N	3	P10201_136_S73	-	-	ACH-000937	lymphoblastic_T_cell_leukemia	T-ALL	PE	6	F	PD	2nd	T-Other	Hypodiploid-LMO2	DSMZ	Yes	RPMI.10%FBS
PF-382 (BioRep)	Set8_tmt10plex_129C	8	-	-	-	ACH-000937	lymphoblastic_T_cell_leukemia	T-ALL	PE	6	F	PD	2nd	T-Other	Hypodiploid-LMO2	DSMZ	Yes	RPMI.10%FBS
RCH-ACV	Set3_tmt10plex_130C	3	P10201_137_S74	YES	-	ACH-000922	B-Cell Precursor Leukemia	BCP-ALL	BM	8	F	Dx	Diagnosis	TCF3-PBX1	TCF3-PBX1	DSMZ	Yes	RPMI.10%FBS
RCH-ACV (BioRep)	Set7_tmt10plex_129C	7	SD.2137.RCH.ACV.R2_S17	-	-	ACH-000922	B-Cell Precursor Leukemia	BCP-ALL	BM	8	F	Dx	Diagnosis	TCF3-PBX1	TCF3-PBX1	DSMZ	Yes	RPMI.10%FBS
REH	Set1_tmt10plex_127N	1	P10201_138_S75	YES	YES	ACH-000960	B-Cell Precursor Leukemia	BCP-ALL	PB	15	F	PD	1st	ETV6-RUNX1	ETV6-RUNX1	ATCC;DSMZ;JCRB	Yes	RPMI.10%FBS
REH (BioRep)	Set6_tmt10plex_130C	6	P10201_139_S76	-	-	ACH-000960	B-Cell Precursor Leukemia	BCP-ALL	PB	15	F	PD	1st	ETV6-RUNX1	ETV6-RUNX1	ATCC;DSMZ;JCRB	Yes	RPMI.10%FBS
RPMI-8402	Set5_tmt10plex_129N	5	P10201_140_S77	-	-	ACH-000636	lymphoblastic_T_cell_leukemia	T-ALL	BM	16	F	Unknown	-	T-Other	LMO1-TCRD	DSMZ	Yes	RPMI.10%FBS
SEM	Set1_tmt10plex_126;Set2_tmt10plex_126;Set3_tmt10plex_126;Set4_tmt10plex_126;Set5_tmt10plex_126;Set6_tmt10plex_126;Set7_tmt10plex_126;Set10_tmt10plex_126	1;2;3;4;5;6;7;10	P10201_141_S78	YES	-	ACH-000782	B-Cell Precursor Leukemia	BCP-ALL	PB	5	F	PD	1st	KMT2A-AFF1	KMT2A-AFF1	DSMZ	Yes	RPMI.10%FBS	Technical replicates in set 1-7 and set10
SEM-BR-NOPS	Set5_tmt10plex_130C	5	P10201_143_S80	-	-	ACH-000782	B-Cell Precursor Leukemia	BCP-ALL	PB	5	F	PD	1st	KMT2A-AFF1	KMT2A-AFF1	DSMZ	Yes	RPMI.10%FBS	No penicillin-streptomycin in media, not used in analysis
SEM (BioRep)	Set4_tmt10plex_130C	4	P10201_142_S79	-	-	ACH-000782	B-Cell Precursor Leukemia	BCP-ALL	PB	5	F	PD	1st	KMT2A-AFF1	KMT2A-AFF1	DSMZ	Yes	RPMI.10%FBS
SUP-B15	Set2_tmt10plex_130C	2	P10201_144_S81	YES	YES	ACH-000059	B-Cell Precursor Leukemia	BCP-ALL	BM	9	M	PD	2nd	BCR-ABL1	BCR-ABL1	ATCC;DSMZ;JCRB	Yes	RPMI.10%FBS
SUP-B15 (BioRep)	Set9_tmt10plex_130C	9	Sample_SH.2290.SUP.B15.R2	-	-	ACH-000059	B-Cell Precursor Leukemia	BCP-ALL	BM	9	M	PD	2nd	BCR-ABL1	BCR-ABL1	ATCC;DSMZ;JCRB	Yes	RPMI.10%FBS
TALL-104	Set6_tmt10plex_130N	6	P10201_145_S82	-	-	-	lymphoblastic_T_cell_leukemia	T-ALL	PB	2	M	Unknown	-	NUP214-ABL1	NUP214-ABL1	ATCC	Yes	IMDM.20+IL2
TANOUE	Set2_tmt10plex_128N	2	P10201_146_S83	YES	YES	-	lymphoblastic_B_cell_leukemia	B-ALL	PB	11	M	Unknown	-	IGH-MYC	IGH-MYC	DSMZ	Yes	RPMI.10%FBS
TANOUE (BioRep)	Set4_tmt10plex_130N	4	-	-	-	-	lymphoblastic_B_cell_leukemia	B-ALL	PB	11	M	Unknown	-	IGH-MYC	IGH-MYC	DSMZ	Yes	RPMI.10%FBS
TMD5	Set4_tmt10plex_128C	4	P10201_147_S84	YES	-	-	lymphoblastic_B_cell_leukemia	BCP-ALL	PB	19	M	Dx	Diagnosis	BCR-ABL1	BCR-ABL1	JCRB	Yes	AMEM.10%FBS
TMD5 (BioRep)	Set10_tmt10plex_129N	10	Sample_SH.2290.TMD5.R2	-	-	-	lymphoblastic_B_cell_leukemia	BCP-ALL	PB	19	M	Dx	Diagnosis	BCR-ABL1	BCR-ABL1	JCRB	Yes	AMEM.10%FBS
380	Set4_tmt10plex_127C	4	P10201_101_S38	YES	-	-	B-Cell Precursor Leukemia	BCP-ALL	PB	15	M	PD	1st	IGH-MYC	IGH-MYC	DSMZ	Yes	RPMI.10%FBS
697	Set1_tmt10plex_128N	1	P10201_102_S39	YES	-	ACH-000070	B-Cell Precursor Leukemia	BCP-ALL	BM	12	M	PD	1st	TCF3-PBX1	TCF3-PBX1	DSMZ	Yes	RPMI.10%FBS
697 (BioRep)	Set9_tmt10plex_127N	9	SD.2137.697.R2_S1	-	-	ACH-000070	B-Cell Precursor Leukemia	BCP-ALL	BM	12	M	PD	1st	TCF3-PBX1	TCF3-PBX1	DSMZ	Yes	RPMI.10%FBS
__POOL__	Set1_tmt10plex_131;Set2_tmt10plex_131;Set3_tmt10plex_131;Set4_tmt10plex_131;Set5_tmt10plex_131;Set6_tmt10plex_131;Set7_tmt10plex_131;Set8_tmt10plex_131;Set9_tmt10plex_131;Set10_tmt10plex_131	1;2;3;4;5;6;7;8;9;10	-	-	-	-	-	-	-	-	-	-	-	-	-	-	-	-	POOL
