# Supplementary material for: Multi-omics molecular phenotyping of childhood acute lymphoblastic leukemia cell lines reveals novel drug vulnerabilities
Source: Research Square preprint supplement (doi:10.21203/rs.3.rs-443839/v1), 2021-04-29
Supplement: Supplementary file 14 [file e79096b0bb0feefdf47980fc.xlsx]

## Sheet: Supp_Table_11_MEF2D_DEqMS
Supplementary Table 11: DEqMS analysis table of MEF2D-HNRNPUL1 cell lines
	logFC	AveExpr	t	P.Value	adj.P.Val	B	gene	count	sca.t	sca.P.Value	sca.adj.pval
ARHGAP6	3.81475	-0.964664	11.5703	1.16796e-14	9.67104e-11	22.7296	ARHGAP6	2	11.5982	8.23192e-15	8.25203e-11
AMER2	2.90951	-0.551243	15.2096	1.72759e-14	9.67104e-11	21.3527	AMER2	3	14.9584	1.4741e-14	8.25203e-11
IDH1	1.34095	-0.10238	9.96797	3.46497e-13	1.29313e-09	19.6166	IDH1	167	10.1194	1.75625e-13	6.55433e-10
MEF2C	-1.4015	0.255182	-9.05743	6.92917e-12	1.93947e-08	16.798	MEF2C	22	-9.10887	5.00229e-12	1.34396e-08
PALLD	2.38638	-0.731438	8.98938	8.70044e-12	1.9482e-08	16.583	PALLD	20	9.05488	6.00198e-12	1.34396e-08
ADSS1	3.66896	-1.22785	8.90757	1.14469e-11	2.10295e-08	16.3239	ADSS1	3	8.95604	8.38475e-12	1.56459e-08
NFATC1	1.75086	-0.387525	8.80906	1.59421e-11	2.23109e-08	16.0108	NFATC1	25	8.8724	1.11357e-11	1.62134e-08
PTPRZ1	3.03474	-1.13061	10.0692	1.31482e-11	2.10295e-08	16.1753	PTPRZ1	1	10.0154	1.15851e-11	1.62134e-08
SMAP1	1.23225	-0.115526	8.63404	2.87868e-11	3.58108e-08	15.4517	SMAP1	26	8.68852	2.08299e-11	2.59124e-08
MEF2D	0.821548	0.141816	8.3007	8.94454e-11	1.00143e-07	14.3777	MEF2D	26	8.33443	7.0206e-11	7.86027e-08
HDAC9	1.85878	-0.132713	8.01365	2.39312e-10	2.23278e-07	13.4438	HDAC9	9	8.05055	1.87435e-10	1.90774e-07
SLC4A8	1.66623	-0.463054	8.35855	1.74349e-10	1.77455e-07	13.7621	SLC4A8	1	8.19463	2.561e-10	2.38942e-07
SERPINI1	2.85199	-1.28905	8.02545	5.06539e-10	4.36247e-07	12.6977	SERPINI1	1	8.01278	4.62253e-10	3.71402e-07
PTK2	-1.70004	0.376532	-7.72059	6.57959e-10	5.26179e-07	12.4827	PTK2	46	-7.78983	4.64419e-10	3.71402e-07
SLC7A3	2.23516	-0.689861	7.64626	8.51154e-10	6.35302e-07	12.2379	SLC7A3	7	7.6879	6.63015e-10	4.82549e-07
GLG1	1.02044	0.147861	7.55467	1.16947e-09	7.70201e-07	11.9357	GLG1	265	7.67665	6.89602e-10	4.82549e-07
CKMT2	3.15126	-0.910016	10.6871	9.66288e-10	6.7616e-07	11.6951	CKMT2	1	10.4113	1.00202e-09	6.59916e-07
PLCL2	1.52886	0.0504988	7.347	2.40771e-09	1.4976e-06	11.2484	PLCL2	70	7.42008	1.6944e-09	1.05392e-06
GLDC	2.90502	-0.971046	7.32909	2.56273e-09	1.51012e-06	11.189	GLDC	31	7.38978	1.88462e-09	1.11054e-06
KTN1	0.611489	0.0773905	7.0685	6.36148e-09	3.39158e-06	10.323	KTN1	433	7.27715	2.7998e-09	1.56733e-06
MGST3	1.09133	0.0957859	7.04051	7.01526e-09	3.57013e-06	10.2298	MGST3	29	7.09141	5.38372e-09	2.8177e-06
TESK2	1.32362	-0.260392	7.10535	5.59322e-09	3.13108e-06	10.4456	TESK2	4	7.08346	5.53674e-09	2.8177e-06
LZTS1	1.83718	-0.53724	7.00075	8.06097e-09	3.89917e-06	10.0974	LZTS1	23	7.05356	6.15194e-09	2.99466e-06
MAP3K7CL	3.10431	-0.528939	7.87557	8.4466e-09	3.89917e-06	10.1563	MAP3K7CL	1	7.88813	6.80181e-09	3.16914e-06
PER3	2.87191	-1.05305	6.97871	8.70661e-09	3.89917e-06	10.024	PER3	2	7.00985	7.17679e-09	3.16914e-06
CAMK4	2.03381	-1.17317	6.93731	1.00632e-08	4.33335e-06	9.88598	CAMK4	43	6.99724	7.50292e-09	3.16914e-06
C5orf51	0.546574	0.150214	6.91729	1.07928e-08	4.47543e-06	9.81927	C5orf51	41	6.99201	7.64263e-09	3.16914e-06
VAT1	0.904497	-0.394134	6.80539	1.59658e-08	6.16389e-06	9.44604	VAT1	89	6.89569	1.07344e-08	4.29223e-06
NUCB1	-1.0348	0.212191	-6.78129	1.73707e-08	6.48273e-06	9.36565	NUCB1	91	-6.86373	1.20156e-08	4.63886e-06
FMO4	1.89862	-0.101353	6.99011	1.31333e-08	5.25143e-06	9.65511	FMO4	1	6.94595	1.38776e-08	5.17913e-06
COBL	2.79246	0.064158	7.63138	2.52749e-08	9.12832e-06	9.01234	COBL	1	7.58584	2.36251e-08	8.53247e-06
ZMIZ1	-0.641215	0.245292	-6.45486	5.44741e-08	1.90591e-05	8.27594	ZMIZ1	17	-6.44274	5.30952e-08	1.85767e-05
MAGI1	2.70354	-0.944251	6.35072	7.84328e-08	2.66101e-05	7.92837	MAGI1	17	6.40049	6.16291e-08	2.09091e-05
LCK	0.833502	-0.503301	6.27175	1.03392e-07	3.08807e-05	7.66493	LCK	98	6.35737	7.17525e-08	2.36277e-05
MTSS2	1.78613	-0.327594	6.27558	1.02019e-07	3.08807e-05	7.67768	MTSS2	9	6.31245	8.40664e-08	2.68916e-05
GNAI3	-0.917833	-0.0105782	-6.19454	1.35439e-07	3.692e-05	7.4075	GNAI3	85	-6.26986	9.76847e-08	3.03799e-05
TEAD1	3.29878	0.135872	9.58177	8.22593e-08	2.70875e-05	6.96473	TEAD1	1	9.06224	1.11755e-07	3.38164e-05
OGG1	-0.878419	-0.0589217	-6.28533	9.85984e-08	3.08807e-05	7.7102	OGG1	4	-6.21157	1.19954e-07	3.53423e-05
KCNMA1	2.03285	-0.562949	6.18814	1.385e-07	3.692e-05	7.3862	KCNMA1	2	6.20199	1.24073e-07	3.56184e-05
ALPK3	2.48961	-0.514283	7.78675	1.22416e-07	3.42643e-05	7.5736	ALPK3	1	7.64662	1.27732e-07	3.57523e-05
HBEGF	2.03858	0.170359	7.34493	1.04811e-07	3.08807e-05	7.71753	HBEGF	1	7.17394	1.31109e-07	3.58023e-05
TPST1	1.3608	0.089925	6.17992	1.4254e-07	3.71135e-05	7.35878	TPST1	3	6.1685	1.39602e-07	3.7214e-05
BEST3	3.07579	-0.860796	6.70887	1.92536e-07	4.89917e-05	7.1844	BEST3	1	6.73043	1.59055e-07	4.14135e-05
SPINK2	2.88803	-1.39783	6.50325	2.17848e-07	5.30222e-05	7.04411	SPINK2	1	6.51958	1.86109e-07	4.73563e-05
SYNJ1	0.623206	-0.171662	5.99523	2.71628e-07	6.47054e-05	6.74407	SYNJ1	43	6.05686	2.06765e-07	5.14432e-05
KLHL5	-0.971126	0.130448	-6.34284	1.14776e-07	3.29495e-05	7.58986	KLHL5	1	-6.10613	2.37573e-07	5.78232e-05
PDSS2	1.01052	-0.248284	5.9859	2.80605e-07	6.54512e-05	6.71308	PDSS2	13	6.00559	2.47583e-07	5.89104e-05
PIP5K1B	1.43918	-0.171205	6.44724	1.97112e-07	4.90416e-05	7.13524	PIP5K1B	1	6.33353	2.52563e-07	5.89104e-05
ARHGAP44	1.79783	-0.594946	5.87713	4.09891e-07	9.3656e-05	6.35192	ARHGAP44	5	5.90536	3.51982e-07	8.04243e-05
POMP	0.7583	-0.339392	5.84387	4.60168e-07	0.000101039	6.24167	POMP	25	5.87638	3.89625e-07	8.72448e-05
APOBEC2	2.38899	-0.686847	6.20176	4.65837e-07	0.000101039	6.29549	APOBEC2	1	6.18369	4.47778e-07	9.83004e-05
IRF1	-0.651139	0.065255	-5.83824	4.69275e-07	0.000101039	6.223	IRF1	10	-5.80082	5.07674e-07	0.000109306
EPHX2	1.71847	-0.845792	5.74727	6.43757e-07	0.000131046	5.9218	EPHX2	14	5.78694	5.32934e-07	0.00011258
NLGN4X	2.0444	-0.632717	5.77032	5.94233e-07	0.000123204	5.99806	NLGN4X	1	5.77093	5.63641e-07	0.000116862
PLAA	-0.965789	-0.0331251	-5.66823	8.4681e-07	0.000163463	5.66067	PLAA	114	-5.73578	6.37332e-07	0.000129738
DGKH	0.90643	-0.0357128	5.67092	8.38946e-07	0.000163463	5.66955	DGKH	37	5.71922	6.75308e-07	0.000135013
PHACTR1	0.904002	-0.114673	5.81479	5.0914e-07	0.000107553	6.14531	PHACTR1	2	5.70845	7.01195e-07	0.000137729
SNX18	-0.674534	0.245906	-5.67877	8.16426e-07	0.000163227	5.69547	SNX18	15	-5.67766	7.80769e-07	0.000150715
ADARB1	1.41536	0.0131983	5.51735	1.42697e-06	0.000266273	5.16382	ADARB1	25	5.55969	1.17767e-06	0.000223479
CCDC6	0.584164	-0.106544	5.4586	1.74746e-06	0.000310549	4.97099	CCDC6	66	5.53407	1.28745e-06	0.000240238
ITPR2	0.846219	-0.122455	5.44544	1.82848e-06	0.00031987	4.92787	ITPR2	188	5.52002	1.35185e-06	0.00024812
SLAIN1	0.606207	-0.0444454	5.4855	1.59269e-06	0.000292324	5.05925	SLAIN1	23	5.50512	1.42365e-06	0.000252516
CCT8	0.33192	-0.0536601	5.23273	3.79418e-06	0.000566396	4.23365	CCT8	771	5.50283	1.43504e-06	0.000252516
ARHGEF9	1.77922	-0.239282	5.47261	1.66511e-06	0.000300687	5.01693	ARHGEF9	5	5.50114	1.44346e-06	0.000252516
GNB4	-0.864958	0.452658	-5.42669	1.95044e-06	0.000334275	4.86643	GNB4	28	-5.46528	1.63478e-06	0.000281585
NRIP1	-1.57006	0.130555	-5.42371	1.97054e-06	0.000334275	4.85668	NRIP1	10	-5.45714	1.68161e-06	0.000285262
STK32C	2.02519	-0.491112	5.47004	2.27229e-06	0.00037322	4.75241	STK32C	5	5.50605	1.91512e-06	0.000320025
GNA11	-0.973979	0.442177	-5.38859	2.22359e-06	0.000371572	4.74174	GNA11	13	-5.40981	1.9813e-06	0.00032605
EXOSC3	-0.39564	-0.0159781	-5.34107	2.61783e-06	0.000412806	4.58649	EXOSC3	43	-5.40574	2.00942e-06	0.00032605
MYOM2	1.71236	-0.610501	5.37874	2.30012e-06	0.00037322	4.70955	MYOM2	1	5.36882	2.28313e-06	0.00036517
MYLK3	1.25553	-0.192489	6.02709	1.27491e-06	0.00024193	5.38672	MYLK3	1	5.78006	2.32382e-06	0.000366443
MPC2	0.626539	-0.156435	5.34642	2.57015e-06	0.000411077	4.60397	MPC2	10	5.31947	2.70751e-06	0.000421017
EFR3B	1.57474	-0.277776	5.26461	3.4021e-06	0.00052178	4.33733	EFR3B	4	5.28516	3.0476e-06	0.00046741
ZNF217	0.799727	-0.169945	5.21421	4.04196e-06	0.000587711	4.17353	ZNF217	60	5.26984	3.21279e-06	0.000486086
C9orf72	-0.886907	0.178664	-5.24961	3.58132e-06	0.000541844	4.28853	C9orf72	6	-5.24109	3.54706e-06	0.000529138
EDARADD	2.41774	-1.28429	5.21904	3.97581e-06	0.000585699	4.18921	EDARADD	1	5.23744	3.59186e-06	0.000529138
ARHGAP32	1.5103	-0.255447	5.19348	4.33851e-06	0.000622743	4.10625	ARHGAP32	13	5.22813	3.70879e-06	0.000539268
EXOSC9	-0.347347	-0.0610211	-5.11028	5.76043e-06	0.000781321	3.83696	EXOSC9	54	-5.20171	4.06137e-06	0.000576661
ITCH	0.306887	-0.144613	5.08279	6.3247e-06	0.000827724	3.74823	ITCH	60	5.20116	4.06897e-06	0.000576661
DBI	0.789002	0.121486	5.10866	5.79222e-06	0.000781321	3.83174	DBI	140	5.17596	4.43676e-06	0.000620925
CNP	-0.391113	0.184656	-5.04008	7.311e-06	0.000906581	3.61065	CNP	109	-5.16717	4.57247e-06	0.000631441
PRKX	0.859683	-0.196433	5.32214	2.79346e-06	0.000434382	4.52474	PRKX	1	5.16386	4.6247e-06	0.000631441
TIGD1	1.04795	-0.156085	5.15114	5.01239e-06	0.000701484	3.96908	TIGD1	6	5.15864	4.70821e-06	0.000635097
EXOSC7	-0.349683	-0.044498	-5.04174	7.27018e-06	0.000906581	3.61597	EXOSC7	60	-5.14068	5.00729e-06	0.0006674
GGA1	0.422735	-0.0504022	5.08753	6.22349e-06	0.000827724	3.76354	GGA1	37	5.13241	5.15108e-06	0.000678488
CYB5B	0.369824	-0.0429145	5.04551	7.17779e-06	0.000906581	3.62811	CYB5B	48	5.11791	5.41318e-06	0.00070472
CKM	2.78012	-1.17749	5.08124	6.35801e-06	0.000827724	3.74324	CKM	2	5.11258	5.51292e-06	0.000709456
EVI5	-1.03702	0.279565	-5.03777	7.36861e-06	0.000906581	3.6032	EVI5	12	-5.06122	6.57082e-06	0.000835988
TRIOBP	-0.532228	0.388602	-5.02313	7.74335e-06	0.000942332	3.55612	TRIOBP	29	-5.05276	6.76339e-06	0.000849685
KSR2	1.09425	-0.0327172	5.29792	5.17964e-06	0.000715942	3.99804	KSR2	1	5.19202	6.86486e-06	0.000849685
RASGRP1	1.1534	-0.503952	5.01512	7.9564e-06	0.000957848	3.53036	RASGRP1	16	5.04663	6.90616e-06	0.000849685
SCML4	1.57342	-0.0862451	5.04685	7.14512e-06	0.000906581	3.63244	SCML4	1	5.03537	7.17659e-06	0.000873359
MAP2	2.00006	-0.0579758	4.9862	8.7744e-06	0.00104341	3.4375	MAP2	21	5.02587	7.41269e-06	0.000892392
MON1B	0.348126	0.00247968	4.98354	8.85352e-06	0.00104341	3.42899	MON1B	33	5.01384	7.72291e-06	0.000919847
TOX	1.07309	-1.15253	4.9527	9.82589e-06	0.00113413	3.33013	TOX	12	4.97756	8.73786e-06	0.00102674
PIP4K2C	1.29433	-0.924645	4.93631	1.03847e-05	0.00116711	3.27767	PIP4K2C	22	4.9731	8.87122e-06	0.00102674
RCOR1	0.401134	0.0166404	4.87465	1.27817e-05	0.00133742	3.08076	RCOR1	80	4.9723	8.89547e-06	0.00102674
PHLPP1	0.719832	0.202947	4.89204	1.20553e-05	0.00127331	3.13623	PHLPP1	34	4.93144	1.02191e-05	0.00116748
LNX2	0.421693	-0.00627938	5.1732	4.64936e-06	0.000658914	4.04051	LNX2	4	4.92704	1.03726e-05	0.00117305
HOPX	1.89973	-0.465145	4.8985	1.17959e-05	0.00127331	3.15685	HOPX	2	4.91794	1.06978e-05	0.00119773
TMEM102	0.800173	-0.0926867	4.89565	1.19099e-05	0.00127331	3.14774	TMEM102	15	4.91442	1.08261e-05	0.00120009
TBCK	0.396356	0.115514	4.8498	1.38947e-05	0.00138897	3.00163	TBCK	45	4.90887	1.10316e-05	0.0012038
DSTYK	-0.832072	-0.0391583	-4.93518	1.04244e-05	0.00116711	3.27406	DSTYK	4	-4.90772	1.10746e-05	0.0012038
LRRC20	0.44548	-0.104816	4.93117	1.05665e-05	0.00117132	3.26121	LRRC20	14	4.89329	1.16292e-05	0.00124652
UBN2	0.524636	-0.10136	4.86443	1.32286e-05	0.00135878	3.04819	UBN2	28	4.8916	1.16959e-05	0.00124652
ZMIZ2	0.591329	-0.1655	4.94491	1.00877e-05	0.00115247	3.30519	ZMIZ2	6	4.88894	1.18016e-05	0.00124652
C12orf4	0.452715	0.0728848	4.89421	1.19676e-05	0.00127331	3.14315	C12orf4	17	4.87743	1.22701e-05	0.00128184
PCBP3	1.5769	-0.514205	4.84987	1.38917e-05	0.00138897	3.00184	PCBP3	5	4.87516	1.2365e-05	0.00128184
PPP1R21	0.41204	0.151481	4.76131	1.86884e-05	0.00174363	2.72087	PPP1R21	87	4.85543	1.32173e-05	0.00135762
RAB35	-0.354316	0.0248724	-4.74976	1.9424e-05	0.00178255	2.68431	RAB35	69	-4.8465	1.36222e-05	0.00137569
STX2	-0.502021	0.00628743	-4.86034	1.34114e-05	0.00136504	3.03518	STX2	15	-4.84614	1.36389e-05	0.00137569
OPA1	0.379677	0.0812557	4.69871	2.30272e-05	0.00201416	2.52325	OPA1	233	4.8386	1.39904e-05	0.00139296
TRIM72	2.21069	-0.661698	4.79709	1.65809e-05	0.00160768	2.83418	TRIM72	33	4.83715	1.4059e-05	0.00139296
EXOSC10	-0.363196	-0.0627974	-4.68823	2.38446e-05	0.0020568	2.49025	EXOSC10	145	-4.8199	1.4901e-05	0.00146344
FRMPD1	2.13933	-0.709552	4.92538	1.66569e-05	0.00160768	2.88799	FRMPD1	1	4.94147	1.51463e-05	0.00147459
DUSP6	-1.41928	-0.402124	-4.79173	1.68809e-05	0.00161537	2.8172	DUSP6	3	-4.80467	1.56859e-05	0.00150464
KRR1	-0.428302	0.0911284	-4.73407	2.04679e-05	0.00183327	2.63476	KRR1	59	-4.80395	1.57238e-05	0.00150464
CTDSP2	-0.457864	0.120677	-4.96844	9.31732e-06	0.00108663	3.38055	CTDSP2	4	-4.7886	1.65575e-05	0.001571
PTGER4	1.56232	-0.478523	4.78919	1.70253e-05	0.00161539	2.80913	PTGER4	1	4.78266	1.68919e-05	0.00158926
NUCB2	0.443517	-0.00940463	4.66574	2.56959e-05	0.00217948	2.41951	NUCB2	207	4.77393	1.7395e-05	0.00162295
COX18	0.670258	-0.285373	4.80634	1.60749e-05	0.00159269	2.86354	COX18	5	4.76512	1.79177e-05	0.00164319
GAREM1	1.83008	-0.504647	4.75751	1.89277e-05	0.00175136	2.70882	GAREM1	1	4.76394	1.79893e-05	0.00164319
PRR36	1.73767	-0.428784	4.86713	1.99733e-05	0.00180339	2.71568	PRR36	2	4.88496	1.80905e-05	0.00164319
CMTM3	-1.77795	-0.252452	-4.74314	1.98579e-05	0.00180339	2.6634	CMTM3	2	-4.76049	1.8199e-05	0.00164319
DEGS1	-0.401193	0.0386782	-4.79979	1.64317e-05	0.00160768	2.84274	DEGS1	13	-4.74227	1.93471e-05	0.00173288
RAPGEF2	0.753965	0.0252789	4.67429	2.4976e-05	0.00213459	2.44639	RAPGEF2	38	4.71467	2.12228e-05	0.0018858
AMER1	0.975686	-0.200847	4.72684	2.09677e-05	0.00184846	2.61192	AMER1	3	4.71153	2.14468e-05	0.00189066
TUSC3	1.33553	-1.02346	4.73084	2.06898e-05	0.00183843	2.62455	TUSC3	1	4.70919	2.16152e-05	0.00189066
DTX3	1.79551	-1.03913	4.68776	2.38822e-05	0.0020568	2.48876	DTX3	2	4.70584	2.18596e-05	0.0018955
MBOAT1	1.00491	-0.381904	4.8301	1.75411e-05	0.00165034	2.8039	MBOAT1	1	4.74888	2.2086e-05	0.0018955
CAAP1	-0.93136	0.068351	-4.66321	2.59129e-05	0.00218136	2.41156	CAAP1	34	-4.70151	2.21786e-05	0.0018955
ABAT	1.00554	0.142403	4.65444	2.66779e-05	0.002229	2.38404	ABAT	19	4.68497	2.34404e-05	0.00198817
EXOSC2	-0.320713	-0.0825897	-4.57817	3.43426e-05	0.00272695	2.14528	EXOSC2	66	-4.6752	2.42183e-05	0.0020387
CLYBL	0.839892	0.232117	4.61739	3.01647e-05	0.00244728	2.26788	CLYBL	34	4.65514	2.58962e-05	0.00216323
DDHD1	-0.458746	0.0212376	-4.61771	3.01327e-05	0.00244728	2.26888	DDHD1	34	-4.65298	2.6084e-05	0.00216323
C21orf91	0.893791	-0.243746	4.64366	2.76496e-05	0.00229307	2.3502	C21orf91	6	4.64669	2.66366e-05	0.00219282
C1orf198	0.794594	-0.0543816	4.61318	3.05888e-05	0.00246383	2.25468	C1orf198	20	4.63972	2.72633e-05	0.00222803
ZBTB38	1.22819	-0.307345	5.70262	1.1433e-05	0.00125494	3.39858	ZBTB38	1	5.27478	2.75431e-05	0.00223458
GLCCI1	1.01666	-0.251743	4.60256	3.16823e-05	0.00253368	2.22148	GLCCI1	18	4.63237	2.79394e-05	0.00225043
SPATA13	-0.839856	-0.213933	-5.23426	1.3093e-05	0.0013573	3.22	SPATA13	1	-4.90916	3.03464e-05	0.00242485
OAT	1.29118	-0.367306	4.56409	3.59763e-05	0.0028322	2.10136	OAT	62	4.60565	3.0538e-05	0.00242485
BCL11A	-0.825652	0.542195	-4.56243	3.6174e-05	0.0028322	2.09619	BCL11A	33	-4.59919	3.12012e-05	0.00246006
CGAS	-0.764207	0.155213	-4.54245	3.86373e-05	0.00300405	2.03395	CGAS	33	-4.5788	3.3388e-05	0.00261407
FNDC3A	0.646286	-0.164796	4.52523	4.08923e-05	0.00311449	1.98038	FNDC3A	49	4.57076	3.42914e-05	0.00264677
IRS1	1.28437	-0.0953362	4.53823	3.91787e-05	0.00302514	2.02081	IRS1	15	4.56942	3.4444e-05	0.00264677
SUV39H2	0.376724	0.216512	4.62073	2.98331e-05	0.00244728	2.27833	SUV39H2	14	4.5688	3.45149e-05	0.00264677
HIP1	1.0233	0.0889218	4.51161	4.2766e-05	0.00323519	1.93808	HIP1	63	4.55458	3.61823e-05	0.00275576
ACTN1	-1.12108	0.315121	-4.49522	4.51326e-05	0.0033687	1.88723	ACTN1	174	-4.54194	3.77289e-05	0.00285414
CD5	0.684705	-1.13185	4.48602	4.65153e-05	0.00344891	1.85874	CD5	15	4.50024	4.3307e-05	0.00325413
VWA8	0.853115	-0.196275	4.43944	5.41848e-05	0.00385233	1.71473	VWA8	146	4.49065	4.46997e-05	0.00331885
SPAG9	0.34447	0.0165658	4.36863	6.82648e-05	0.00453668	1.49694	SPAG9	153	4.49023	4.47613e-05	0.00331885
SEC61B	-0.48411	0.023846	-4.53013	4.02375e-05	0.00308561	1.99563	SEC61B	8	-4.48094	4.61551e-05	0.00339969
OXCT1	0.8761	-0.0123974	4.4288	5.61031e-05	0.00390143	1.68191	OXCT1	119	4.47784	4.66289e-05	0.00341214
PKIA	1.9217	-0.70863	4.46077	5.05301e-05	0.00372194	1.78061	PKIA	1	4.47313	4.73589e-05	0.00342116
ADD2	1.75204	-0.132099	4.43458	5.50529e-05	0.00385233	1.69974	ADD2	38	4.47202	4.75314e-05	0.00342116
TET2	-1.18873	-0.289623	-4.44142	5.38352e-05	0.00385233	1.72083	TET2	15	-4.47115	4.76689e-05	0.00342116
PDE7A	0.649026	-0.208921	4.43706	5.46081e-05	0.00385233	1.70739	PDE7A	26	4.4655	4.85634e-05	0.00346003
SH3RF3	-1.9206	0.370068	-4.44065	5.39718e-05	0.00385233	1.71844	SH3RF3	2	-4.4621	4.91098e-05	0.00346003
ELF1	0.459009	0.0808284	4.41189	5.92888e-05	0.00409752	1.62983	ELF1	48	4.46193	4.91376e-05	0.00346003
LUZP1	-0.496358	0.0990332	-4.38345	6.50486e-05	0.00444076	1.54242	LUZP1	108	-4.45425	5.03963e-05	0.00351318
NEK6	-1.07078	0.151355	-4.43543	5.4901e-05	0.00385233	1.70234	NEK6	7	-4.4535	5.05201e-05	0.00351318
GHITM	0.409672	0.143062	4.49532	4.51169e-05	0.0033687	1.88756	GHITM	10	4.43444	5.37882e-05	0.00371736
DAPK3	-0.376145	0.0686635	-4.45588	5.13474e-05	0.00375742	1.76547	DAPK3	16	-4.42459	5.55569e-05	0.00381604
AFF1	-0.637486	0.147747	-4.39284	6.30896e-05	0.00433344	1.57124	AFF1	27	-4.4219	5.60489e-05	0.00382636
BCAT1	1.1833	0.239227	4.3763	6.65816e-05	0.0044715	1.52046	BCAT1	139	4.41983	5.64309e-05	0.00382909
RFTN1	-0.98676	0.143472	-4.35583	7.11648e-05	0.00468683	1.45773	RFTN1	81	-4.3991	6.04001e-05	0.00407373
C16orf87	0.571544	0.10556	4.44612	5.30139e-05	0.00385233	1.73534	C16orf87	4	4.37822	6.46739e-05	0.00433587
KLHL9	-1.08823	-0.256181	-4.35257	7.19218e-05	0.00470898	1.44776	KLHL9	7	-4.37158	6.6094e-05	0.00440469
CYP51A1	1.17316	-0.0524518	4.32496	7.86638e-05	0.00509087	1.36336	CYP51A1	56	4.36406	6.77389e-05	0.00447493
ZNF595	1.29614	-0.787408	4.37808	6.61957e-05	0.0044715	1.52594	ZNF595	1	4.36312	6.79473e-05	0.00447493
HSD17B12	0.586224	0.18376	4.30201	8.47363e-05	0.00535385	1.29334	HSD17B12	84	4.35707	6.93027e-05	0.0045375
GCDH	0.360023	0.0661144	4.2896	8.82043e-05	0.005456	1.25558	GCDH	53	4.3511	7.06675e-05	0.00459996
RRAS	-1.03024	0.286282	-4.33074	7.72031e-05	0.00502538	1.38101	RRAS	7	-4.34784	7.14235e-05	0.0046223
NIPSNAP1	0.742798	0.0403646	4.29888	8.55965e-05	0.00535385	1.28383	NIPSNAP1	49	4.33988	7.3303e-05	0.00471667
TCF4	-0.849944	0.184985	-4.30739	8.32727e-05	0.00532755	1.30974	TCF4	21	-4.33564	7.43221e-05	0.00475492
PTPRK	1.5422	-0.672637	4.29958	8.5403e-05	0.00535385	1.28596	PTPRK	19	4.33283	7.50058e-05	0.00477139
IFT122	0.506689	-0.0928291	4.29245	8.73957e-05	0.00543601	1.26425	IFT122	32	4.32381	7.72442e-05	0.00488603
NDRG2	1.18653	-0.400119	4.31419	8.14597e-05	0.00524151	1.33047	NDRG2	3	4.32194	7.77164e-05	0.00488828
PDCD10	0.319018	-0.0827344	4.23145	0.000106398	0.00611689	1.07913	PDCD10	63	4.31046	8.06735e-05	0.00504593
CSK	-0.736506	-0.0888782	-4.24989	0.000100266	0.00597117	1.13497	CSK	134	-4.30135	8.31015e-05	0.00516891
CNTLN	-0.853612	-0.106455	-4.25288	9.93046e-05	0.00597117	1.14403	CNTLN	20	-4.28031	8.89788e-05	0.0055039
AGMAT	2.47073	-0.970981	4.4321	0.000102014	0.005997	1.28618	AGMAT	1	4.45342	9.18949e-05	0.00565305
MTMR12	-0.528682	0.259171	-4.22009	0.000110356	0.00630382	1.04479	MTMR12	44	-4.26167	9.45222e-05	0.00568723
APOL3	-0.673644	-0.214229	-4.23878	0.000103916	0.00605963	1.10133	APOL3	20	-4.26121	9.46615e-05	0.00568723
CLIP1	-0.334603	-0.026724	-4.15021	0.000138046	0.00755712	0.834412	CLIP1	148	-4.26103	9.47187e-05	0.00568723
GLT1D1	1.94015	-0.489824	4.27704	0.000106537	0.00611689	1.10509	GLT1D1	3	4.30529	9.50307e-05	0.00568723
MOB3B	-1.08937	0.0442267	-4.41346	8.44943e-05	0.00535385	1.35784	MOB3B	1	-4.36225	9.54445e-05	0.00568723
SYTL2	1.59624	-0.182212	4.6346	9.51896e-05	0.00585573	1.39961	SYTL2	1	4.607	9.56375e-05	0.00568723
PTPN22	0.841252	-0.804398	4.23695	0.000104531	0.00606386	1.09579	PTPN22	13	4.25686	9.60063e-05	0.00568723
MKNK1	-0.48543	0.0594895	-4.2554	9.85015e-05	0.00597117	1.15167	MKNK1	13	-4.24392	0.000100114	0.00589933
MIEN1	-0.324189	0.0239839	-4.25308	9.92408e-05	0.00597117	1.14464	MIEN1	22	-4.24165	0.000100851	0.00591169
EFR3A	-0.502713	0.133242	-4.1992	0.000118009	0.00670675	0.981758	EFR3A	39	-4.23718	0.00010232	0.00596651
MAP2K2	-0.323046	0.0288789	-4.19658	0.000119006	0.00672926	0.973851	MAP2K2	26	-4.20186	0.000114677	0.00665245
IREB2	-0.690847	0.0809093	-4.13996	0.000142639	0.00771491	0.803679	IREB2	91	-4.18773	0.000120017	0.00692636
TRAF5	0.919716	-0.37782	4.15838	0.00013449	0.00749127	0.858928	TRAF5	19	4.186	0.000120686	0.00692925
METTL15	0.594046	-0.0978411	4.15336	0.000136663	0.00755712	0.843872	METTL15	26	4.1796	0.000123196	0.00703728
RIMKLB	0.683097	-0.0540303	4.24596	0.000101541	0.005997	1.12308	RIMKLB	2	4.17553	0.00012482	0.00708895
SMIM24	1.25891	-0.382839	4.14947	0.000138372	0.00755712	0.832201	SMIM24	8	4.17417	0.000125367	0.00708895
SNX14	0.317672	-0.0313555	4.16583	0.000131322	0.00735138	0.881319	SNX14	25	4.16683	0.00012836	0.00722169
RMC1	0.359452	0.02038	4.13245	0.000146094	0.00782616	0.781207	RMC1	35	4.16503	0.000129107	0.00722743
DDX27	-0.247102	0.0267351	-4.00326	0.000220017	0.0102271	0.397235	DDX27	139	-4.16066	0.000130931	0.00729306
PPARD	-0.70546	0.0912308	-4.19288	0.000120428	0.00677541	0.962691	PPARD	3	-4.15528	0.000133213	0.00738342
PIK3C2B	-0.618186	0.331686	-4.10634	0.000158765	0.00822933	0.703134	PIK3C2B	67	-4.15229	0.000134496	0.00741781
GRAMD4	-0.892428	0.0463155	-4.11063	0.000156612	0.00815548	0.715948	GRAMD4	36	-4.14514	0.000137619	0.00755284
SYNGR1	-1.39782	0.425342	-4.11914	0.000152425	0.00801985	0.741382	SYNGR1	4	-4.13933	0.000140203	0.00763296
RSRC1	0.259841	0.0213021	4.14235	0.000141552	0.00769328	0.810861	RSRC1	27	4.13797	0.000140815	0.00763296
RAB11FIP2	0.494538	0.0442521	4.25162	9.97091e-05	0.00597117	1.14021	RAB11FIP2	3	4.13702	0.000141247	0.00763296
AS3MT	1.31554	-0.220627	4.10233	0.000160802	0.0082965	0.691171	AS3MT	26	4.1351	0.000142117	0.00763296
EXOSC4	-0.361849	-0.0568274	-4.13446	0.000145161	0.00781355	0.787224	EXOSC4	22	-4.13429	0.000142487	0.00763296
HSPA2	-1.15995	0.506124	-4.09611	0.000164014	0.00842338	0.672615	HSPA2	19	-4.12613	0.00014626	0.00777581
PYROXD2	1.14081	-0.205472	4.22641	0.000148338	0.00790855	0.826756	PYROXD2	2	4.22052	0.000146543	0.00777581
RPS6KA1	-0.54259	0.331639	-4.07093	0.000177661	0.00904536	0.597638	RPS6KA1	64	-4.1187	0.000149776	0.00790989
ZKSCAN8	0.273348	0.0842937	4.12597	0.000149147	0.00791396	0.761793	ZKSCAN8	24	4.11118	0.000153425	0.00806455
HLA-F	-1.00442	-0.0452799	-4.05733	0.000185483	0.0093253	0.557238	HLA-F	28	-4.08925	0.000164551	0.00858575
CPNE2	-0.979668	0.50455	-4.05407	0.000187406	0.0093253	0.54757	CPNE2	38	-4.08857	0.000164911	0.00858575
C1D	-0.387954	-0.0174892	-4.24363	0.000102307	0.005997	1.11602	C1D	4	-4.08718	0.000165642	0.00858575
SLC25A15	0.954412	0.0100851	4.05461	0.000187087	0.0093253	0.549163	SLC25A15	25	4.08517	0.000166706	0.00860109
MYO5C	-1.6748	0.294394	-4.04502	0.00019285	0.00946996	0.520723	MYO5C	19	-4.07698	0.000171117	0.00876801
C4orf3	-0.597989	0.302201	-4.25054	0.000100055	0.00597117	1.13695	C4orf3	1	-4.07626	0.000171507	0.00876801
RAB3IP	0.825992	-0.120698	4.05491	0.000186912	0.0093253	0.550042	RAB3IP	12	4.07346	0.000173046	0.00880648
TFDP2	0.85747	-0.324568	4.04677	0.000191787	0.00946996	0.525906	TFDP2	12	4.06645	0.000176949	0.00896436
FUCA2	1.70855	-0.888746	4.03982	0.000196046	0.0095432	0.505316	FUCA2	1	4.05016	0.000186361	0.00939865
GPT2	1.28783	-0.220597	4.01676	0.000210852	0.010003	0.43709	GPT2	20	4.04744	0.000187979	0.00940088
ZNF121	0.288545	-0.0142257	4.36766	6.84798e-05	0.00453668	1.49397	ZNF121	4	4.04726	0.000188085	0.00940088
ERO1B	1.03317	-0.0241044	4.01978	0.000208857	0.00996946	0.446	ERO1B	13	4.04465	0.00018965	0.00943699
ZNF703	-1.11564	0.397702	-4.26932	0.000154933	0.00810577	0.889626	ZNF703	1	-4.18503	0.000190757	0.00945006
EXOSC8	-0.31379	-0.0936741	-4.00349	0.000219857	0.0102271	0.397914	EXOSC8	38	-4.04111	0.000191797	0.00945974
TRIM9	-1.32713	0.0597964	-4.00806	0.000216717	0.0101948	0.41139	TRIM9	15	-4.03726	0.000194154	0.00949846
ELK3	-1.65344	-0.00819877	-4.01521	0.000211886	0.0100096	0.432509	ELK3	3	-4.03706	0.000194279	0.00949846
FAM8A1	0.580656	0.176634	4.03575	0.000198586	0.00956239	0.493253	FAM8A1	9	4.03017	0.00019857	0.00964584
ITGA4	-0.404545	-0.133319	-3.96676	0.000246777	0.0111408	0.28977	ITGA4	75	-4.02796	0.000199969	0.00964584
EXOSC5	-0.278952	-0.0158944	-4.04061	0.000195561	0.0095432	0.507638	EXOSC5	23	-4.02513	0.000201768	0.00964584
DCLK2	1.39891	-0.0253883	4.00046	0.000221971	0.0102271	0.388954	DCLK2	6	4.02461	0.000202106	0.00964584
FUT4	-0.454729	0.0251398	-4.07079	0.00017774	0.00904536	0.597222	FUT4	7	-4.02459	0.000202117	0.00964584
PRX	1.86757	-0.467329	4.07196	0.000227174	0.0103814	0.418135	PRX	3	4.1017	0.000202463	0.00964584
EPB41L3	1.28272	0.0840051	4.22987	0.000181915	0.00921595	0.747682	EPB41L3	1	4.17801	0.000203347	0.0096469
FRYL	0.350712	-0.166573	3.92472	0.000281492	0.0122154	0.166634	FRYL	172	4.01954	0.000205379	0.00970223
IPO9	-0.308815	0.0764938	-3.90398	0.000300319	0.0128826	0.106105	IPO9	144	-4.01017	0.000211565	0.00992079
NCKAP5	1.9093	-0.31422	4.00547	0.000234373	0.0106668	0.353618	NCKAP5	3	4.0318	0.000211778	0.00992079
BDH2	0.420728	0.072999	4.00055	0.000221905	0.0102271	0.389231	BDH2	19	4.00328	0.000216223	0.0100633
EXOSC1	-0.313203	0.0524439	-4.03615	0.000198338	0.00956239	0.494424	EXOSC1	17	-4.00271	0.000216618	0.0100633
GAB1	1.04622	0.229826	3.96201	0.000250476	0.0112049	0.275845	GAB1	54	3.99777	0.000220026	0.0101478
SLC27A2	1.63451	-0.521332	3.96154	0.000250851	0.0112049	0.274444	SLC27A2	56	3.99592	0.000221318	0.0101478
SINHCAF	0.25753	0.109928	4.14971	0.000138267	0.00755712	0.832911	SINHCAF	10	3.99525	0.000221787	0.0101478
PPP3CA	-0.494358	0.283629	-3.95115	0.000259152	0.0114231	0.24398	PPP3CA	53	-3.99485	0.000222063	0.0101478
ADAT3	-0.344246	0.0410905	-4.11883	0.000152575	0.00801985	0.740461	ADAT3	6	-3.99206	0.000224034	0.0101963
RGS12	-0.846518	0.405299	-3.95906	0.000252806	0.0112318	0.267177	RGS12	18	-3.98419	0.000229674	0.0104106
DLG1	-0.483608	0.127966	-3.93434	0.000273155	0.0119463	0.19475	DLG1	49	-3.97622	0.000235522	0.0106327
EEPD1	-1.28875	0.316856	-3.95196	0.000258495	0.0114231	0.246356	EEPD1	6	-3.97442	0.000236859	0.0106501
DYNC2LI1	-0.760763	0.19231	-3.96109	0.000251199	0.0112049	0.273145	DYNC2LI1	8	-3.97029	0.000239969	0.0107468
NDST1	-0.609603	0.0815637	-3.99818	0.000223567	0.0102584	0.382245	NDST1	4	-3.96381	0.000244917	0.0109247
C6orf136	0.461868	-0.0653004	4.41505	6.66971e-05	0.0044715	1.57626	C6orf136	1	3.98822	0.000248466	0.011039
ARNTL	-0.642708	-0.0102255	-4.01917	0.000209255	0.00996946	0.444213	ARNTL	2	-3.95133	0.000254732	0.0112387
RNF14	-0.468944	-0.0519172	-3.936	0.000271742	0.0119311	0.199602	RNF14	22	-3.95103	0.000254968	0.0112387
GNE	0.396406	0.0684218	3.89991	0.000304156	0.0129715	0.0942392	GNE	55	3.94977	0.000255984	0.0112392
RUNX1	0.471908	0.101886	3.89447	0.000309352	0.0129719	0.0784079	RUNX1	54	3.93872	0.000265037	0.0115575
RNFT2	0.605018	-0.294886	3.97271	0.000242207	0.0109788	0.307263	RNFT2	4	3.9384	0.000265297	0.0115575
KCNMB4	2.07853	-0.64537	5.43405	0.000199003	0.00956239	0.86442	KCNMB4	1	5.10123	0.000268221	0.0116396
EIF2D	-0.327438	-0.0450261	-3.84799	0.000357415	0.0145108	-0.0564885	EIF2D	92	-3.92777	0.000274307	0.0118577
SLC25A14	0.534091	0.139094	4.00083	0.000221711	0.0102271	0.390052	SLC25A14	3	3.92569	0.000276103	0.0118894
FHL1	-1.12167	0.755034	-3.87742	0.000326209	0.0135268	0.0288296	FHL1	77	-3.91346	0.000286897	0.0123069
PTPRA	-0.234574	0.130955	-3.83677	0.000370054	0.0148764	-0.0889287	PTPRA	52	-3.91028	0.000289766	0.0123825
LIG4	0.788135	-0.125877	3.87163	0.000332137	0.0137218	0.0120076	LIG4	55	3.90837	0.000291505	0.0123968
ZNF114	1.26802	-0.288444	3.91333	0.000291684	0.0126089	0.133377	ZNF114	1	3.90749	0.000292314	0.0123968
IMPACT	2.01957	-0.562274	3.88624	0.000317384	0.0132113	0.0544553	IMPACT	1	3.90381	0.000295701	0.0124931
SENP8	0.525606	-0.0777497	3.90777	0.00029679	0.0127802	0.117154	SENP8	10	3.90054	0.000298747	0.0125743
BIK	1.12085	-0.421233	4.05532	0.000275134	0.011986	0.308936	BIK	1	4.00918	0.000305117	0.0127943
TRPM2	-1.10249	0.243015	-3.86355	0.000340579	0.0140188	-0.0114339	TRPM2	17	-3.89114	0.000307661	0.0128529
CCDC174	0.27891	-0.0237013	3.8862	0.000317421	0.0132113	0.0543466	CCDC174	26	3.88696	0.000311701	0.0129732
LONP2	0.445224	-0.271835	3.84772	0.000357715	0.0145108	-0.0572723	LONP2	38	3.8818	0.000316764	0.0131352
CCDC71L	-0.504106	0.211625	-3.89869	0.000305314	0.0129715	0.0906873	CCDC71L	7	-3.87355	0.000325034	0.0134283
METTL16	0.325457	0.141717	3.82374	0.000385276	0.0151885	-0.126547	METTL16	46	3.8704	0.000328246	0.0135112
PAM	-0.988765	0.204873	-3.93351	0.000307205	0.0129719	0.110292	PAM	1	-3.89756	0.000336079	0.0137829
MPHOSPH6	-0.337205	-0.0743348	-3.83152	0.000376116	0.0149858	-0.104094	MPHOSPH6	33	-3.8581	0.000341072	0.0139367
RALGAPA1	-0.362949	-0.0775791	-3.80253	0.000411348	0.0159912	-0.187631	RALGAPA1	58	-3.85551	0.000343836	0.0139985
GNB2	-0.368257	0.124409	-3.796	0.000419705	0.0161179	-0.206385	GNB2	63	-3.85131	0.000348364	0.0140832
EPHB3	-1.53283	0.271096	-3.83504	0.000372043	0.0148764	-0.093931	EPHB3	2	-3.85124	0.000348433	0.0140832
APRT	-0.303456	0.212285	-3.74255	0.000494605	0.0180324	-0.359411	APRT	153	-3.84267	0.00035785	0.0143153
KLF3	-1.0386	-0.0453399	-3.84514	0.000360587	0.0145745	-0.0647365	KLF3	2	-3.84253	0.000358007	0.0143153
CUX2	1.61876	-0.692272	4.57599	0.000305867	0.0129715	0.491853	CUX2	1	4.44751	0.000358012	0.0143153
VPS29	-0.260779	0.0946237	-3.77883	0.000442482	0.0167933	-0.255655	VPS29	50	-3.83926	0.000361663	0.0143657
ERGIC1	0.551127	0.163877	3.80838	0.000403986	0.0157597	-0.170786	ERGIC1	34	3.83901	0.000361948	0.0143657
MAPK14	0.321022	0.0591457	3.76413	0.000462927	0.017312	-0.297752	MAPK14	83	3.83797	0.000363121	0.0143657
UBE2G1	0.287527	-0.0538428	3.8356	0.000371397	0.0148764	-0.0923081	UBE2G1	25	3.83544	0.000365981	0.0144279
EPHB4	-1.14394	0.43269	-3.79978	0.000414844	0.0160713	-0.195522	EPHB4	9	-3.82313	0.000380249	0.0149378
R3HCC1	-0.447584	-0.0132501	-3.8129	0.000398392	0.0156505	-0.15778	R3HCC1	19	-3.82126	0.000382458	0.014972
ALKBH2	-0.629556	-0.103542	-3.81132	0.000400335	0.0156719	-0.162319	ALKBH2	9	-3.81496	0.000390008	0.0152144
ARL2BP	0.470108	-0.0152221	3.79549	0.000420366	0.0161179	-0.207853	ARL2BP	23	3.81278	0.000392645	0.0152641
TENM4	1.50966	-0.0951975	3.77546	0.000447095	0.016911	-0.265321	TENM4	23	3.80579	0.000401243	0.0155444
TBL1X	0.753596	-0.128113	3.82968	0.000378258	0.0150176	-0.109392	TBL1X	2	3.7971	0.000412183	0.0159131
HSD17B7	0.403499	-0.0951474	3.79193	0.000425004	0.0162401	-0.218084	HSD17B7	19	3.79519	0.000414624	0.0159156
NADK2	0.624186	0.295266	3.75836	0.000471199	0.0174687	-0.314253	NADK2	50	3.79483	0.000415091	0.0159156
ANTXR2	-1.21716	-0.125681	-3.76403	0.000463074	0.017312	-0.298047	ANTXR2	6	-3.78525	0.000427565	0.0163377
B2M	-0.692279	-0.134569	-3.74809	0.000486274	0.0178503	-0.343589	B2M	53	-3.78415	0.000429017	0.0163377
DALRD3	0.473637	-0.249932	3.82768	0.000380612	0.0150577	-0.115182	DALRD3	5	3.77785	0.000437445	0.0166022
FMNL3	-1.12421	0.0273471	-3.76027	0.000468452	0.0174246	-0.308806	FMNL3	4	-3.77493	0.000441411	0.0166961
TPST2	0.471819	0.0339734	3.86003	0.000344311	0.0141206	-0.0216135	TPST2	3	3.76827	0.000450573	0.0169852
MACROH2A2	2.2154	-0.860432	3.73564	0.000505178	0.0181538	-0.379107	MACROH2A2	7	3.76434	0.000456063	0.017112
ACVR1	-0.932708	-0.135122	-3.79644	0.000419144	0.0161179	-0.205139	ACVR1	1	-3.76368	0.000456993	0.017112
C1orf21	-1.00651	-0.102403	-3.74157	0.000496086	0.0180324	-0.362194	C1orf21	6	-3.75808	0.000464938	0.0173515
P4HTM	1.10447	-0.483086	3.74281	0.000494214	0.0180324	-0.358673	P4HTM	4	3.75695	0.000466558	0.0173541
ZKSCAN1	0.394025	0.0218884	3.73535	0.000505616	0.0181538	-0.379914	ZKSCAN1	27	3.75413	0.000470626	0.0173671
NEU3	0.528485	0.162923	3.75422	0.00047722	0.0175755	-0.326082	NEU3	11	3.75334	0.000471782	0.0173671
CROCC	-0.538434	0.125678	-3.7029	0.000558303	0.0196441	-0.472175	CROCC	125	-3.75287	0.000472464	0.0173671
SOX11	1.35986	-0.025125	3.73518	0.000505894	0.0181538	-0.380425	SOX11	3	3.75242	0.000473114	0.0173671
CHMP5	0.310978	-0.121723	3.72759	0.000517764	0.0185204	-0.402018	CHMP5	31	3.74854	0.000478804	0.0175186
APBA2	0.596883	-0.247359	3.93132	0.000309253	0.0129719	0.10407	APBA2	1	3.77755	0.000483135	0.0176195
MAST1	1.13939	-0.0561943	3.87306	0.000497678	0.0180324	-0.230764	MAST1	2	3.86659	0.000492295	0.0178953
CASP9	0.372356	0.0933229	3.76558	0.000460883	0.017312	-0.293628	CASP9	12	3.73715	0.000495864	0.0179666
LMO4	0.78983	0.117279	3.78872	0.000429221	0.0163454	-0.227291	LMO4	1	3.73181	0.000504067	0.0181642
KDM4D	-0.606011	-0.0502352	-3.85372	0.000351119	0.0143472	-0.0398949	KDM4D	1	-3.73149	0.000504562	0.0181642
HOOK2	-0.360999	0.237907	-3.71707	0.000534688	0.0190043	-0.431957	HOOK2	24	-3.72737	0.000510983	0.0183117
OCIAD2	0.824974	-0.682367	3.70208	0.000559705	0.0196441	-0.474508	OCIAD2	19	3.72677	0.000511928	0.0183117
LCLAT1	0.302104	-0.0936043	3.76346	0.000463881	0.017312	-0.299668	LCLAT1	15	3.72528	0.000514264	0.0183366
RIN2	-2.22189	0.94892	-6.00279	0.00019261	0.00946996	0.386344	RIN2	1	-5.0431	0.000520155	0.0184878
FAM136A	0.342971	0.0118005	3.67975	0.000599062	0.0206372	-0.537714	FAM136A	43	3.71927	0.00052384	0.0185047
MRPL24	-0.524567	-0.0324928	-3.68411	0.000591167	0.0204914	-0.525377	MRPL24	44	-3.71921	0.000523935	0.0185047
SYTL1	0.627857	-0.0313602	3.71543	0.000537362	0.0190389	-0.436601	SYTL1	8	3.71753	0.000526627	0.0185412
SH3GL1	-0.367021	0.00888576	-3.68285	0.000593448	0.0205069	-0.528957	SH3GL1	35	-3.71233	0.000535087	0.0187748
RASA2	-0.843186	-0.194793	-3.67457	0.000608569	0.0206471	-0.552353	RASA2	79	-3.7108	0.000537614	0.0187748
MRPL41	-0.678	-0.0589439	-3.68523	0.00058916	0.0204852	-0.522214	MRPL41	24	-3.71038	0.000538292	0.0187748
CTSC	0.871727	-0.278349	3.67803	0.000602202	0.0206471	-0.542575	CTSC	23	3.70506	0.00054714	0.0190242
DHX32	1.94344	-0.503135	3.68602	0.000587743	0.0204852	-0.519975	DHX32	1	3.70309	0.000550439	0.0190613
ATP8A1	0.732833	0.357222	3.66505	0.000626412	0.021061	-0.579217	ATP8A1	74	3.7024	0.000551612	0.0190613
RANBP6	0.482333	0.0158508	3.66637	0.00062391	0.0210401	-0.575497	RANBP6	41	3.70035	0.000555087	0.0191223
SMG5	-0.23324	0.0537385	-3.67623	0.000605497	0.0206471	-0.547647	SMG5	33	-3.69678	0.000561179	0.0192041
SPIRE1	2.1184	-1.09598	3.70809	0.000604731	0.0206471	-0.474959	SPIRE1	1	3.72703	0.00056214	0.0192041
VPREB1	1.05067	0.0665977	3.66932	0.000618339	0.0209152	-0.567159	VPREB1	18	3.69595	0.000562607	0.0192041
PSD3	-1.03767	0.753998	-3.66163	0.000632946	0.0212169	-0.58886	PSD3	49	-3.69394	0.000566063	0.0192633
INPP5B	0.304484	-0.00747961	3.63612	0.000683775	0.02219	-0.660628	INPP5B	55	3.69022	0.000572529	0.0194244
ZNF35	1.23619	0.259277	3.81966	0.00055766	0.0196441	-0.342076	ZNF35	1	3.79828	0.000576821	0.0195108
SLC2A5	-1.67649	0.398294	-3.65651	0.000642853	0.0213458	-0.603294	SLC2A5	11	-3.68422	0.000583116	0.019633
ZC3H8	0.523389	0.0212011	3.65718	0.000641551	0.0213458	-0.60141	ZC3H8	30	3.68368	0.000584095	0.019633
MPP6	-0.849061	0.0843703	-3.64815	0.000659344	0.0217118	-0.62683	MPP6	64	-3.68278	0.000585694	0.019633
E2F3	0.27521	-0.0514445	3.75551	0.000475334	0.0175638	-0.322393	E2F3	12	3.68006	0.000590581	0.0197377
NLRP1	-0.573549	0.28757	-3.65744	0.00064103	0.0213458	-0.600655	NLRP1	15	-3.67004	0.000608905	0.0202371
PPIB	-0.419304	-0.0181057	-3.60308	0.000755471	0.0238934	-0.753197	PPIB	234	-3.66991	0.000609138	0.0202371
NLRC5	-0.673814	-0.00580127	-3.64866	0.000658313	0.0217118	-0.625376	NLRC5	14	-3.66502	0.000618275	0.0204799
MAP3K20	-0.974698	0.00698381	-3.63011	0.000696305	0.0224664	-0.677492	MAP3K20	41	-3.66137	0.000625186	0.0206477
HSPBP1	0.317496	-0.236613	3.5838	0.000800569	0.0248977	-0.806987	HSPBP1	82	3.65067	0.000645875	0.0212683
DPY19L1	0.48703	0.244083	3.64395	0.000667784	0.0219253	-0.638647	DPY19L1	14	3.64744	0.000652249	0.0213722
SIRPA	-2.07124	-0.148171	-3.65613	0.000705302	0.0226913	-0.665627	SIRPA	1	-3.67685	0.000652849	0.0213722
METAP2	-0.413268	0.207436	-3.58731	0.000792159	0.0247738	-0.797191	METAP2	115	-3.64535	0.000656404	0.021426
STIP1	0.186485	-0.0402519	3.41451	0.00132365	0.0358837	-1.27219	STIP1	674	3.64434	0.000658418	0.0214292
CTDSPL	-1.2712	-0.243877	-3.63999	0.000675826	0.0220599	-0.649766	CTDSPL	1	-3.6395	0.00066817	0.0216836
ADPRM	0.46549	0.156937	3.71811	0.00053298	0.019004	-0.428981	ADPRM	3	3.63506	0.000677231	0.0218845
CSRP2	-1.01887	0.594019	-3.60931	0.000741418	0.0236493	-0.735772	CSRP2	16	-3.63456	0.000678272	0.0218845
DTX1	-1.24766	-0.295716	-3.63251	0.000691286	0.0223689	-0.670773	DTX1	1	-3.63099	0.000685658	0.0220593
NISCH	0.393778	0.0609066	3.60554	0.000749896	0.0238518	-0.746323	NISCH	28	3.62593	0.000696252	0.0223359
ITGB1BP1	-0.521517	0.164381	-3.61547	0.000727771	0.0232804	-0.718528	ITGB1BP1	14	-3.62271	0.000703074	0.0224789
ACP6	0.816355	-0.0188698	3.59828	0.000766462	0.0241727	-0.766599	ACP6	18	3.62194	0.000704725	0.0224789
MRPL35	-0.47357	0.0161413	-3.69306	0.000575293	0.0201281	-0.500062	MRPL35	3	-3.61565	0.000718264	0.0228457
MYH9	-0.330632	0.0965024	-3.51196	0.00099236	0.0288583	-1.00597	MYH9	2520	-3.61052	0.000729513	0.0231378
PDIA5	-0.850207	-0.134807	-3.57953	0.000810895	0.0250104	-0.818871	PDIA5	35	-3.60936	0.00073207	0.0231533
NAV2	1.96351	-0.7177	3.58972	0.000786437	0.0246861	-0.790466	NAV2	1	3.6073	0.000736638	0.0232321
ZEB2	-0.594776	0.651208	-3.56369	0.000850329	0.0258703	-0.862897	ZEB2	73	-3.60265	0.000747079	0.0234952
PARG	0.168104	0.0252837	3.47022	0.00112323	0.0317567	-1.12055	PARG	69	3.60031	0.000752375	0.0235955
COX15	0.373276	0.0564235	3.64221	0.000671303	0.0219763	-0.643529	COX15	8	3.59672	0.000760572	0.0237534
STXBP1	-0.683256	-0.122204	-3.56458	0.000848069	0.0258703	-0.860429	STXBP1	42	-3.59625	0.000761654	0.0237534
CTIF	-1.02049	0.422456	-3.58011	0.00080949	0.0250104	-0.817264	CTIF	4	-3.59246	0.00077042	0.0239601
ALDH7A1	-1.34721	0.322714	-3.55646	0.000868954	0.0262941	-0.882978	ALDH7A1	44	-3.58691	0.000783425	0.024293
XRCC4	0.328929	-0.00454947	3.54257	0.000905809	0.0271888	-0.921466	XRCC4	48	3.58543	0.000786943	0.024293
PCYT2	0.452443	0.0659412	3.54084	0.000910499	0.0272566	-0.92625	PCYT2	70	3.58513	0.000787634	0.024293
ADAP1	-1.16279	-0.130307	-3.56669	0.000842723	0.025779	-0.854568	ADAP1	3	-3.57985	0.000800284	0.0246153
MRPL37	-0.448984	-0.0163572	-3.53499	0.000926552	0.0275896	-0.942438	MRPL37	68	-3.57884	0.000802719	0.0246226
BCR	-0.621314	0.219608	-3.53755	0.000919497	0.0274525	-0.935359	BCR	97	-3.57779	0.000805262	0.0246331
IFNAR1	-0.391388	0.0360386	-3.58529	0.000796977	0.024855	-0.802815	IFNAR1	14	-3.57563	0.00081051	0.0247261
THAP9	0.346347	-0.0736758	3.65571	0.000644415	0.0213458	-0.60555	THAP9	6	3.57351	0.000815705	0.0248169
INPP4A	0.356897	-0.211491	3.52339	0.000959165	0.0283328	-0.974472	INPP4A	57	3.56972	0.000825074	0.0249967
NATD1	0.801759	0.0653073	3.57461	0.000822952	0.0253126	-0.832558	NATD1	3	3.56931	0.000826081	0.0249967
EIPR1	0.233338	0.162863	3.55153	0.000881857	0.0266126	-0.896637	EIPR1	30	3.56198	0.000844485	0.0254848
AMMECR1	0.64079	-0.0675561	3.60339	0.000754762	0.0238934	-0.752326	AMMECR1	2	3.55947	0.000850894	0.0256092
WSB1	-0.717922	-0.206325	-3.57002	0.000834351	0.0255929	-0.845312	WSB1	3	-3.55628	0.000859095	0.0257867
FBP1	1.77011	-0.196486	3.52595	0.00095186	0.0281932	-0.967393	FBP1	7	3.55204	0.000870096	0.026047
PPP6R3	0.223642	0.000691899	3.42207	0.00129459	0.035525	-1.2517	PPP6R3	161	3.55107	0.000872624	0.0260531
LIN7C	-0.536971	0.0679997	-3.52157	0.000964371	0.0283388	-0.979483	LIN7C	18	-3.53696	0.000910354	0.0271072
STT3B	0.347143	0.0031732	3.47515	0.00110695	0.0315354	-1.10705	STT3B	89	3.53445	0.000917217	0.0272391
AADAT	1.70192	-0.461254	3.57201	0.00097983	0.0287177	-0.94884	AADAT	1	3.58793	0.000919973	0.0272487
SEC22A	-0.239202	0.00145385	-3.6372	0.000681554	0.0221822	-0.657606	SEC22A	11	-3.53007	0.000929321	0.0274069
CFAP36	0.431466	-0.209423	3.5068	0.0010077	0.0292286	-1.02016	CFAP36	29	3.52975	0.00093021	0.0274069
AKAP17A	-0.477662	0.0595576	-3.48927	0.00106157	0.0305535	-1.06834	AKAP17A	60	-3.52852	0.000933639	0.0274327
PPP1R18	-0.602634	0.26755	-3.48728	0.00106786	0.0306558	-1.07381	PPP1R18	102	-3.52768	0.000935987	0.0274327
HACD1	0.968713	-0.0254144	3.56891	0.000894796	0.0269305	-0.892176	HACD1	1	3.54629	0.000943133	0.02757
MRTFA	0.389142	-0.00536478	3.53237	0.000933809	0.0277319	-0.949664	MRTFA	14	3.52355	0.000947628	0.0276293
TRAM2	-0.751844	-0.263442	-3.51352	0.000987781	0.0288583	-1.00169	TRAM2	6	-3.52096	0.000954998	0.0277718
OSBPL1A	0.947588	0.243917	3.49063	0.0010573	0.0305092	-1.06462	OSBPL1A	33	3.51943	0.000959389	0.0278272
MPP2	0.52836	-0.163917	3.70688	0.000606902	0.0206471	-0.525719	MPP2	1	3.5396	0.000978664	0.0282957
CAMSAP2	-1.01969	-0.0520917	-3.48548	0.00107357	0.0307409	-1.07874	CAMSAP2	22	-3.51211	0.000980593	0.0282957
SESTD1	0.304171	0.0120395	3.51253	0.000990688	0.0288583	-1.00441	SESTD1	18	3.49865	0.00102077	0.0293792
GSE1	0.454627	-0.33717	3.45538	0.00117357	0.0327664	-1.16107	GSE1	45	3.48944	0.00104916	0.0301131
SLC30A9	0.566843	-0.0903071	3.46718	0.00113335	0.0319622	-1.12884	SLC30A9	23	3.48864	0.00105165	0.0301131
NDUFB1	-0.408072	0.0868584	-3.56136	0.000856302	0.0259814	-0.869384	NDUFB1	4	-3.48611	0.00105959	0.0302632
SMCR8	-0.558731	0.11407	-3.47166	0.00111843	0.0317567	-1.11659	SMCR8	15	-3.48448	0.00106476	0.0302861
XIRP1	0.851644	0.166104	3.60415	0.000961634	0.0283328	-0.811	XIRP1	2	3.56035	0.0010658	0.0302861
TET3	-0.346091	0.0835744	-3.50189	0.00102252	0.0295817	-1.03367	TET3	13	-3.47981	0.00107965	0.0306018
KIF16B	-0.565721	0.688225	-3.44253	0.00121891	0.0338633	-1.19608	KIF16B	56	-3.47743	0.00108731	0.0307411
SERINC5	-0.799127	0.179271	-3.45691	0.0011683	0.0327006	-1.15691	SERINC5	9	-3.47274	0.00110258	0.0310944
PPM1G	0.20834	-0.0716313	3.31754	0.00175617	0.0434042	-1.53268	PPM1G	240	3.46629	0.00112387	0.0316153
MRPL22	-0.262613	0.072625	-3.44905	0.00119572	0.0333018	-1.17834	MRPL22	29	-3.46135	0.00114048	0.0320021
DNTTIP1	-0.313814	0.190831	-3.43573	0.00124361	0.0343789	-1.21461	DNTTIP1	33	-3.45992	0.00114532	0.0320337
PTPN11	0.248552	0.147412	3.36073	0.00154914	0.0403352	-1.41722	PTPN11	135	3.45933	0.00114733	0.0320337
NPC1	0.814851	0.220694	3.43022	0.00126394	0.0348549	-1.22959	NPC1	33	3.45835	0.00115066	0.0320467
EPS8L2	1.29566	-0.675091	3.43675	0.00123987	0.0343604	-1.21183	EPS8L2	3	3.45349	0.00116736	0.0324312
TMEM120A	0.568763	-0.0312054	3.46587	0.00113776	0.032006	-1.13243	TMEM120A	4	3.44396	0.00120077	0.0330861
FGD4	1.2511	-0.0643205	3.41861	0.00130782	0.0358003	-1.26108	FGD4	14	3.44391	0.00120092	0.0330861
TMEM38A	1.02524	0.305208	3.48402	0.00116656	0.0327006	-1.13278	TMEM38A	1	3.46928	0.00120114	0.0330861
DDA1	0.21663	-0.116714	3.47045	0.00112245	0.0317567	-1.11991	DDA1	22	3.44268	0.00120532	0.0330861
MEPCE	-0.217503	0.136557	-3.36471	0.0015313	0.0401509	-1.40655	MEPCE	65	-3.44257	0.00120571	0.0330861
UBE3A	0.194474	-0.0129392	3.29636	0.00186704	0.0448571	-1.58896	UBE3A	147	3.4391	0.00121814	0.0333454
CEMIP2	-0.813924	0.357735	-3.4145	0.00132368	0.0358837	-1.27221	CEMIP2	16	-3.43646	0.00122768	0.0335247
ZSCAN20	-0.779547	0.081899	-3.47627	0.00110327	0.0315106	-1.10397	ZSCAN20	1	-3.43478	0.00123381	0.0336099
SS18	-0.169818	0.076994	-3.58274	0.000803123	0.0249079	-0.809941	SS18	15	-3.43147	0.0012459	0.033857
UBE2N	-0.184048	0.0545113	-3.30584	0.00181664	0.0442584	-1.56381	UBE2N	87	-3.42663	0.00126385	0.0342121
PRKCH	-0.940914	-1.04012	-3.40478	0.00136197	0.0367438	-1.29852	PRKCH	12	-3.4263	0.00126508	0.0342121
PARP12	-0.372477	-0.0733298	-3.39897	0.0013854	0.0372858	-1.31425	PARP12	31	-3.42204	0.00128109	0.0345615
TRPM7	0.370021	0.123469	3.40821	0.00134835	0.0364641	-1.28925	TRPM7	23	3.41981	0.00128951	0.034636
TP53BP1	0.333777	0.0968958	3.3429	0.00163165	0.0414239	-1.465	TP53BP1	286	3.41968	0.00129003	0.034636
PREX1	-1.02019	0.290123	-3.38546	0.00144128	0.0385234	-1.35071	PREX1	92	-3.41718	0.00129955	0.0348081
PRKCE	0.572672	0.435611	3.38357	0.00144923	0.0385362	-1.35578	PRKCE	43	3.4144	0.00131024	0.0349523
PPHLN1	0.173556	-0.000857241	3.35707	0.00156573	0.0404847	-1.42703	PPHLN1	44	3.41416	0.00131118	0.0349523
CHD3	-0.391097	0.229414	-3.35401	0.00157974	0.0407528	-1.43523	CHD3	133	-3.40973	0.0013284	0.0353272
ECM1	-1.35554	-0.0142695	-3.38232	0.00145455	0.0385362	-1.35917	ECM1	14	-3.40792	0.0013355	0.0354318
INPP5A	-0.723435	0.165085	-3.38536	0.0014417	0.0385234	-1.35098	INPP5A	14	-3.40388	0.00135145	0.0357703
RABAC1	0.313085	-0.0794844	3.58942	0.00078715	0.0246861	-0.791307	RABAC1	3	3.40263	0.00135645	0.0358179
CAMKMT	0.500537	-0.100772	3.41742	0.0013124	0.0358222	-1.26431	CAMKMT	6	3.40077	0.00136387	0.0359293
STEAP3	1.45706	-0.566694	3.38873	0.00142755	0.0383281	-1.34189	STEAP3	1	3.39804	0.00137487	0.0360755
DLL3	1.67671	0.216576	3.40197	0.00145418	0.0385362	-1.34178	DLL3	1	3.41693	0.00137587	0.0360755
HIBCH	0.409473	-0.0431299	3.34587	0.00161759	0.0413483	-1.45704	HIBCH	102	3.39532	0.00138589	0.0362534
ADAM23	1.7686	-0.451959	3.59901	0.00150569	0.0396652	-1.11812	ADAM23	1	3.60912	0.00141213	0.0368537
TM6SF1	1.43078	-0.280576	3.40155	0.00145595	0.0385362	-1.29061	TM6SF1	1	3.40674	0.00141704	0.0368959
IGFBP4	-0.526772	0.0418715	-3.42867	0.00126972	0.0349282	-1.2338	IGFBP4	3	-3.38641	0.00142262	0.0369552
TXNDC12	0.404239	-0.05285	3.34397	0.00162655	0.0414239	-1.46212	TXNDC12	57	3.38319	0.00143611	0.0372191
S100A13	-1.19021	0.315152	-3.35779	0.00156246	0.0404847	-1.42511	S100A13	13	-3.38209	0.00144076	0.0372535
OMA1	0.405093	0.00500535	3.37646	0.00147965	0.0390712	-1.37493	OMA1	15	3.37637	0.00146513	0.0377472
DDX50	0.252262	-0.110535	3.29764	0.00186018	0.0447984	-1.58558	DDX50	91	3.37543	0.00146917	0.0377472
SLC25A33	0.607417	-0.165248	3.41674	0.00131502	0.0358222	-1.26615	SLC25A33	2	3.37506	0.00147078	0.0377472
FOCAD	-0.850671	-0.329306	-3.34346	0.00162898	0.0414239	-1.4635	FOCAD	53	-3.3737	0.00147663	0.0377472
GCAT	0.642772	-0.110382	3.35039	0.00159649	0.0409023	-1.44495	GCAT	24	3.37368	0.00147671	0.0377472
ALKBH3	0.575395	-0.274304	3.36265	0.0015405	0.0402037	-1.41206	ALKBH3	12	3.37271	0.00148092	0.0377578
ABCF3	-0.256815	-0.0143449	-3.304	0.00182631	0.0442584	-1.56869	ABCF3	75	-3.37203	0.00148387	0.0377578
SPRYD4	-0.550433	0.40254	-3.35305	0.00158418	0.0407734	-1.43782	SPRYD4	18	-3.36955	0.00149469	0.0379469
QKI	-0.477543	0.136209	-3.3312	0.00168802	0.0423746	-1.49627	QKI	59	-3.36758	0.00150331	0.0380794
C11orf74	1.59085	-0.0225468	3.41568	0.00155532	0.0404023	-1.2643	C11orf74	1	3.42133	0.00150691	0.0380843
KCNN4	-0.985899	-0.207643	-3.35204	0.00158882	0.0407992	-1.44051	KCNN4	3	-3.36082	0.00153332	0.0386646
OGN	-0.812638	-0.785321	-3.36709	0.0015207	0.0399667	-1.40015	OGN	2	-3.35721	0.00154961	0.0389874
SMG7	-0.240554	0.0797684	-3.3068	0.00181162	0.0442584	-1.56126	SMG7	47	-3.35321	0.00156781	0.0392902
MTAP	-1.14122	0.108226	-3.3271	0.00170822	0.0427756	-1.50721	MTAP	21	-3.35302	0.00156866	0.0392902
ICAM2	0.555791	-0.0512642	3.34131	0.00163918	0.0414842	-1.46924	ICAM2	13	3.35179	0.0015743	0.0393435
DNTT	-1.40034	0.281716	-3.32162	0.00173554	0.0430846	-1.52181	DNTT	75	-3.35089	0.00157847	0.0393597
UPF3B	-0.263465	0.251851	-3.28569	0.00192539	0.0458652	-1.61724	UPF3B	73	-3.34972	0.00158385	0.0393649
ATP11A	-0.490302	0.197501	-3.32313	0.00172798	0.0429922	-1.51779	ATP11A	33	-3.34932	0.00158571	0.0393649
YES1	-1.13611	0.0600222	-3.319	0.0017488	0.0433176	-1.52881	YES1	5	-3.33733	0.00164211	0.0406748
FOXRED1	0.267539	0.0684658	3.31449	0.00177176	0.043597	-1.54081	FOXRED1	30	3.33032	0.00167599	0.0413152
SLC27A3	-1.02331	0.300077	-3.30538	0.00181908	0.0442584	-1.56504	SLC27A3	17	-3.32961	0.00167947	0.0413152
SYVN1	0.404928	0.167993	3.32641	0.00171164	0.0427756	-1.50905	SYVN1	16	3.32939	0.00168052	0.0413152
BTN3A3	-0.581463	0.112088	-3.33229	0.00168269	0.0423357	-1.49335	BTN3A3	6	-3.32894	0.00168272	0.0413152
MLX	-0.467907	0.285105	-3.32359	0.00172567	0.0429922	-1.51656	MLX	13	-3.32716	0.00169147	0.0414391
SETD6	1.00711	-0.256419	3.31469	0.00177071	0.043597	-1.54026	SETD6	2	3.31869	0.00173363	0.0423792
PPP1R12C	-0.226323	0.190967	-3.2584	0.00208255	0.0477792	-1.6893	PPP1R12C	55	-3.31659	0.00174425	0.0424929
RAB34	-1.02686	0.83701	-3.28901	0.00190707	0.0456229	-1.60846	RAB34	33	-3.31627	0.00174587	0.0424929
TMTC4	0.620361	-0.00886575	3.33508	0.00166911	0.0420887	-1.4859	TMTC4	3	3.31549	0.00174984	0.0424972
CYP7B1	1.89085	-1.33376	3.55525	0.0018606	0.0447984	-1.23545	CYP7B1	1	3.56	0.00176166	0.0426917
POR	-0.379482	0.0844597	-3.26452	0.00204632	0.0472197	-1.67319	POR	82	-3.31128	0.00177135	0.0427552
CPD	0.514193	-0.307014	3.27445	0.00198873	0.0465788	-1.64698	CPD	72	3.31116	0.00177192	0.0427552
NHEJ1	-0.255086	0.158292	-3.30655	0.00181289	0.0442584	-1.56191	NHEJ1	25	-3.30796	0.00178847	0.0430618
ARPP21	-0.970889	0.109334	-3.28222	0.00194472	0.0461295	-1.62642	ARPP21	21	-3.30711	0.00179289	0.0430754
SMG1	0.170834	0.0410881	3.14805	0.00285054	0.0578164	-1.97681	SMG1	147	3.30561	0.00180072	0.0431711
PGD	0.164044	-0.00544045	3.08891	0.0033651	0.0634449	-2.1283	PGD	454	3.29889	0.00183611	0.043654
GBP4	-0.714025	0.0402163	-3.26835	0.00202388	0.0469139	-1.66306	GBP4	51	-3.29841	0.00183868	0.043654
EFNA1	-1.31158	0.193492	-3.38018	0.00187106	0.0448574	-1.46555	EFNA1	1	-3.37921	0.00184163	0.043654
TAP1	-0.660976	-0.0165677	-3.26518	0.00204241	0.0472197	-1.67143	TAP1	69	-3.29785	0.00184165	0.043654
LYRM7	0.355544	-0.000474912	3.30443	0.00182406	0.0442584	-1.56755	LYRM7	15	3.29766	0.00184265	0.043654
TXNDC5	0.413203	0.0498181	3.24681	0.00215292	0.0488926	-1.71979	TXNDC5	140	3.29698	0.0018463	0.043654
ANKRD11	0.179164	0.120585	3.19601	0.00248867	0.0541031	-1.85262	ANKRD11	73	3.29663	0.00184816	0.043654
ATP2B1	-0.70376	0.305776	-3.26394	0.00204973	0.0472197	-1.67471	ATP2B1	56	-3.29465	0.00185879	0.0437615
KCNJ2	1.97493	-0.360671	3.27219	0.00200172	0.0466901	-1.65295	KCNJ2	2	3.29367	0.00186408	0.0437615
ICAM3	0.700201	-0.459972	3.26993	0.00201472	0.0468038	-1.65889	ICAM3	24	3.2936	0.00186444	0.0437615
FMOD	2.97389	0.624768	7.24168	0.000717639	0.023022	-0.915721	FMOD	1	5.32829	0.00187734	0.0438876
UBN1	-0.230408	0.0156051	-3.27374	0.00199279	0.0465788	-1.64884	UBN1	32	-3.29116	0.00187765	0.0438876
SPRY1	0.903541	-0.738373	3.28104	0.00195137	0.0461892	-1.62955	SPRY1	3	3.28699	0.00190044	0.044199
VPS35	-0.191147	0.0787217	-3.14215	0.0028983	0.0585729	-1.992	VPS35	213	-3.2868	0.00190146	0.044199
CUTC	0.343513	0.169995	3.25189	0.00212179	0.0482837	-1.70643	CUTC	44	3.28586	0.00190666	0.044199
MAPKAPK2	0.481127	0.22073	3.25408	0.00210852	0.0481774	-1.70067	MAPKAPK2	47	3.28584	0.00190676	0.044199
SORT1	0.772448	-0.40286	3.25548	0.00210008	0.0480829	-1.69699	SORT1	39	3.28337	0.00192042	0.0444236
CAPG	1.1052	-0.529973	3.2523	0.00211935	0.0482837	-1.70537	CAPG	107	3.28238	0.00192591	0.0444587
DPF1	-0.764285	-0.203287	-3.27768	0.0019703	0.046539	-1.63842	DPF1	4	-3.28106	0.00193329	0.0445374
ZSCAN2	0.465031	0.123394	3.36384	0.00153518	0.0401586	-1.40888	ZSCAN2	2	3.27972	0.00194078	0.0446113
DUS3L	-0.305443	-0.0554703	-3.23737	0.00221192	0.0497282	-1.74459	DUS3L	52	-3.27906	0.00194447	0.0446113
UVSSA	-0.307434	-0.149036	-3.27609	0.00197936	0.0465788	-1.64264	UVSSA	19	-3.27195	0.00198481	0.0454437
FBXL20	0.430378	0.152564	3.26296	0.00205551	0.0472557	-1.6773	FBXL20	16	3.26948	0.00199898	0.0456746
NCR3LG1	0.906666	-0.715986	3.28456	0.00193169	0.0459176	-1.62024	NCR3LG1	1	3.26761	0.00200976	0.0458274
ZBTB7B	-0.754968	0.0487104	-3.27471	0.00198725	0.0465788	-1.64629	ZBTB7B	2	-3.26161	0.00204485	0.0465328
GTF3C5	-0.196327	-0.0155036	-3.18786	0.00254696	0.0549958	-1.87382	GTF3C5	58	-3.25749	0.00206925	0.0469925
REEP5	-0.46378	0.105673	-3.23192	0.00224665	0.0504078	-1.75888	REEP5	28	-3.25392	0.00209056	0.0473803
TSC22D1	-0.627582	-0.220508	-3.24526	0.00216252	0.0490113	-1.72387	TSC22D1	8	-3.25306	0.00209579	0.0474029
FBXO33	0.554185	-0.410546	3.26989	0.00201496	0.0468038	-1.659	FBXO33	4	3.25216	0.00210117	0.0474288
NUMB	-0.310969	0.144963	-3.22522	0.00229001	0.0511653	-1.7764	NUMB	35	-3.25096	0.00210847	0.0474979
RNF5	0.316269	-0.0849257	3.31091	0.0017902	0.0439542	-1.55033	RNF5	7	3.25025	0.00211278	0.0474994
EIF4G3	-0.285526	0.188644	-3.1721	0.00266329	0.0558177	-1.91469	EIF4G3	163	-3.24698	0.00213269	0.0478509
MLXIP	-0.42577	0.28946	-3.24075	0.00219063	0.049548	-1.73572	MLXIP	14	-3.24302	0.00215709	0.0483016
CAP2	-1.5328	0.404933	-3.21829	0.00233577	0.0518875	-1.79454	CAP2	6	-3.24122	0.00216828	0.0484315
SHF	0.766128	-0.00355208	3.27452	0.00198835	0.0465788	-1.6468	SHF	1	3.2407	0.00217154	0.0484315
SDHAF4	0.397005	0.0936569	3.28586	0.00192444	0.0458652	-1.61679	SDHAF4	5	3.23976	0.00217736	0.0484647
LPP	-0.463566	0.313244	-3.20811	0.00240448	0.0528892	-1.8211	LPP	45	-3.23893	0.00218256	0.0484839
ACBD7	0.935668	-0.301344	3.21181	0.00237927	0.0525379	-1.81144	ACBD7	21	3.23608	0.00220047	0.0487851
MTM1	-0.53424	0.248766	-3.20393	0.00243326	0.0533127	-1.832	MTM1	40	-3.23225	0.00222478	0.0492265
PCCB	0.746935	0.0664649	3.19608	0.00248821	0.0541031	-1.85245	PCCB	67	3.22663	0.00226094	0.0499281
CHFR	0.948151	-0.319219	3.20457	0.00242882	0.0533127	-1.83033	CHFR	7	3.22225	0.00228944	0.0504578
EXOSC6	-0.25459	-0.0303675	-3.21114	0.00238382	0.0525379	-1.81319	EXOSC6	27	-3.21901	0.00231076	0.0507759
ELMSAN1	-0.385385	0.189959	-3.18039	0.00260148	0.0553787	-1.8932	ELMSAN1	60	-3.21868	0.00231294	0.0507759
CCS	-0.440262	0.295234	-3.20046	0.00245743	0.0537371	-1.84105	CCS	23	-3.21736	0.00232171	0.0508687
GNAZ	-1.05052	0.300054	-3.19449	0.00249947	0.0542327	-1.85659	GNAZ	12	-3.21663	0.00232657	0.0508755
LGALSL	-0.462829	0.0693131	-3.23903	0.00220142	0.0495918	-1.74023	LGALSL	5	-3.2138	0.00234543	0.0511879
SLC31A1	-0.559043	-0.111689	-3.30024	0.00184628	0.0446457	-1.57869	SLC31A1	1	-3.21292	0.00235135	0.0512172
AGTPBP1	0.258768	0.0563739	3.1779	0.00261992	0.0553829	-1.89967	AGTPBP1	41	3.21178	0.00235904	0.051285
NDRG3	-0.34878	-0.126999	-3.1845	0.00257138	0.0552575	-1.88255	NDRG3	35	-3.21021	0.00236963	0.0514154
CERK	-0.693721	0.170316	-3.21609	0.00235043	0.0521096	-1.80027	CERK	3	-3.20878	0.0023793	0.0515254
GFM1	0.254215	-0.0651859	3.12962	0.00300236	0.0599187	-2.02422	GFM1	122	3.20716	0.00239036	0.051665
MACC1	0.780237	-0.925911	3.44813	0.00164143	0.0414842	-1.21434	MACC1	1	3.29717	0.00240278	0.0518263
GUCY1A1	-1.07326	-0.100012	-3.18323	0.00258064	0.0553503	-1.88584	GUCY1A1	10	-3.20472	0.00240708	0.0518263
BACH1	0.338791	0.296642	3.17633	0.00263163	0.0553829	-1.90374	BACH1	37	3.20382	0.00241324	0.0518591
AREL1	-0.343117	0.0553603	-3.23932	0.00219958	0.0495918	-1.73946	AREL1	8	-3.20306	0.00241848	0.0518723
MARCHF5	0.292943	0.0488048	3.18752	0.00254941	0.0549958	-1.8747	MARCHF5	28	3.20196	0.00242609	0.051936
PRR5L	-1.6557	0.378179	-3.19676	0.00260289	0.0553787	-1.82244	PRR5L	2	-3.21575	0.00244324	0.0520707
TBC1D1	0.487083	0.170294	3.16098	0.00274842	0.0567736	-1.94346	TBC1D1	91	3.19917	0.00244546	0.0520707
RNF169	0.193391	0.0786824	3.1257	0.00303563	0.0602604	-2.03428	RNF169	62	3.19876	0.00244833	0.0520707
SLC12A6	0.625502	-0.581911	3.17668	0.00262897	0.0553829	-1.90282	SLC12A6	22	3.19802	0.00245348	0.0520707
ZNF597	0.899308	-0.159182	3.21302	0.00237111	0.0524643	-1.8083	ZNF597	1	3.19761	0.00245636	0.0520707
VPS13D	-0.232023	0.0690732	-3.1334	0.00297061	0.0597108	-2.01451	VPS13D	68	-3.19705	0.00246029	0.0520707
MRPL47	-0.399716	-0.0631818	-3.18135	0.0025944	0.0553787	-1.89071	MRPL47	23	-3.19619	0.00246636	0.0521006
BTF3L4	-0.397077	0.204501	-3.15664	0.0027823	0.0571381	-1.95467	BTF3L4	61	-3.19411	0.00248098	0.0521637
TNFRSF13B	1.82763	-1.0798	3.2686	0.00263959	0.0554462	-1.70867	TNFRSF13B	1	3.2848	0.00248271	0.0521637
C12orf29	-0.339188	-0.0363667	-3.19109	0.0025237	0.0546526	-1.86542	C12orf29	19	-3.19378	0.00248332	0.0521637
GSTK1	-0.556709	0.0816704	-3.16174	0.00274249	0.0567559	-1.94149	GSTK1	47	-3.19133	0.00250073	0.052431
TRAF3IP2	-0.707516	0.358253	-3.1696	0.00268218	0.0559211	-1.92115	TRAF3IP2	15	-3.18845	0.0025213	0.0527635
NDUFB9	-0.401938	0.094325	-3.17158	0.00266724	0.0558177	-1.91604	NDUFB9	23	-3.18657	0.00253485	0.0529482
RAB26	-0.7397	0.153231	-3.27511	0.00225377	0.0504664	-1.71994	RAB26	1	-3.22531	0.00255152	0.0531971
MRPL48	-0.35133	0.0378729	-3.16601	0.00270959	0.0562909	-1.93045	MRPL48	27	-3.18295	0.00256107	0.0532969
GLI3	-0.922482	0.215362	-3.18056	0.00260026	0.0553787	-1.89277	GLI3	2	-3.18219	0.00256664	0.0533137
VDAC1	0.460003	0.170237	3.13188	0.00298338	0.05986	-2.01843	VDAC1	424	3.1806	0.00257825	0.0534557
ADNP2	-0.415338	-0.179193	-3.17049	0.00267543	0.0558845	-1.91885	ADNP2	18	-3.17984	0.0025838	0.0534718
CDKN2AIPNL	0.343731	-0.269155	3.16596	0.00270997	0.0562909	-1.93058	CDKN2AIPNL	23	3.17674	0.00260672	0.0538466
CWC27	0.185847	-0.0651889	3.07174	0.00353004	0.0657205	-2.17191	CWC27	91	3.17316	0.00263338	0.0542651
MTFR2	0.509216	-0.304189	3.15661	0.0027825	0.0571381	-1.95473	MTFR2	19	3.17271	0.00263668	0.0542651
COA1	0.367331	-0.138882	3.19775	0.00247644	0.0540471	-1.84811	COA1	8	3.1711	0.00264875	0.0544137
ITM2C	0.837842	-0.102112	3.14812	0.00284997	0.0578164	-1.97663	ITM2C	17	3.17001	0.002657	0.0544831
IFT43	0.637955	-0.294969	3.22459	0.00229412	0.0511653	-1.77804	IFT43	1	3.16814	0.00267115	0.0546731
PLEKHA7	0.903609	-0.58216	3.17902	0.00261164	0.0553787	-1.89677	PLEKHA7	1	3.16502	0.00269486	0.0550578
PSMB7	0.413015	-0.163586	3.12267	0.00306158	0.0604731	-2.04206	PSMB7	87	3.16395	0.00270303	0.055124
DPP3	0.216028	-0.0838429	3.05643	0.00368357	0.0673877	-2.21068	DPP3	186	3.16244	0.00271464	0.0552602
MYLK	1.1925	0.172961	3.13533	0.00295453	0.0594944	-2.00955	MYLK	35	3.16159	0.00272118	0.0552927
ELOVL2	1.50554	-0.639621	3.14234	0.00289675	0.0585729	-1.99151	ELOVL2	2	3.1596	0.00273661	0.0555056
SYNE3	-0.591216	0.428343	-3.12131	0.00307327	0.0605781	-2.04554	SYNE3	136	-3.15728	0.00275464	0.0556071
KDM1A	0.278126	0.0269177	3.0849	0.00340298	0.0640331	-2.1385	KDM1A	160	3.15722	0.00275512	0.0556071
VPS26B	-0.757203	-0.086255	-3.12776	0.00301812	0.060126	-2.029	VPS26B	62	-3.15704	0.00275652	0.0556071
LDB1	0.215777	0.0211663	3.15113	0.0028259	0.057525	-1.96888	LDB1	28	3.15572	0.00276681	0.0557144
DTX3L	-0.405096	0.0904948	-3.11189	0.00315559	0.0613369	-2.06966	DTX3L	98	-3.15506	0.002772	0.0557188
NRROS	0.461337	-0.456142	3.15611	0.00278648	0.0571381	-1.95604	NRROS	9	3.15269	0.00279064	0.0559928
JAK1	-0.326019	0.230052	-3.10413	0.00322493	0.0622297	-2.0895	JAK1	78	-3.15166	0.00279884	0.0560569
KIF7	0.874494	-0.525886	3.1304	0.0029958	0.0598947	-2.02222	KIF7	9	3.14849	0.00282401	0.05646
ACBD3	0.303143	0.00666721	3.10115	0.00325194	0.0623437	-2.0971	ACBD3	67	3.14782	0.00282937	0.0564664
B3GAT3	0.25108	-0.0625223	3.17965	0.00260699	0.0553787	-1.89514	B3GAT3	15	3.14547	0.00284823	0.0565727
TCOF1	-0.243619	0.116713	-3.06958	0.00355135	0.0657205	-2.17739	TCOF1	111	-3.14523	0.00285019	0.0565727
PLD4	1.01452	0.229629	3.13834	0.00292957	0.0590981	-2.0018	PLD4	2	3.14474	0.00285414	0.0565727
PRICKLE3	-0.530745	0.0166942	-3.15511	0.00279435	0.0571948	-1.95862	PRICKLE3	5	-3.14451	0.00285596	0.0565727
MRPL33	-0.499911	0.0543246	-3.15335	0.00280823	0.0573739	-1.96315	MRPL33	6	-3.14402	0.00285997	0.0565727
UTP14C	0.449933	-0.130984	3.17719	0.00262519	0.0553829	-1.90151	UTP14C	4	3.14152	0.00288017	0.056872
KIRREL2	1.1172	-0.571854	3.29707	0.00273215	0.0566466	-1.71029	KIRREL2	1	3.26558	0.002891	0.056889
ELOVL5	0.665372	-0.475723	3.1258	0.00303476	0.0602604	-2.03402	ELOVL5	11	3.14017	0.0028912	0.056889
IGLL1	0.98162	0.193496	3.11369	0.0031397	0.0613369	-2.06506	IGLL1	17	3.13663	0.00292024	0.0573256
UBE3C	-0.468464	-0.107512	-3.10278	0.00323709	0.0622297	-2.09293	UBE3C	58	-3.13568	0.0029281	0.0573256
NDUFV3	-0.385474	0.130772	-3.09643	0.00329514	0.062849	-2.10914	NDUFV3	69	-3.1356	0.00292875	0.0573256
C18orf25	0.460614	-0.0690225	3.10838	0.00318674	0.0616214	-2.07863	C18orf25	35	3.13394	0.00294248	0.0574938
NPTN	-0.362139	0.202336	-3.115	0.00312815	0.0613369	-2.06169	NPTN	26	-3.13136	0.00296398	0.0578132
SPINT1	1.34026	-0.0994781	3.10343	0.00323118	0.0622297	-2.09126	SPINT1	11	3.12663	0.00300375	0.0584447
PIKFYVE	0.257629	0.0399386	3.05851	0.00366232	0.0671086	-2.20541	PIKFYVE	103	3.12609	0.00300834	0.0584447
LRRC8C	-0.475625	0.260657	-3.09463	0.00331173	0.0629511	-2.11372	LRRC8C	51	-3.12558	0.00301264	0.0584447
TFCP2	0.389598	-0.096809	3.11061	0.00316689	0.0614497	-2.07292	TFCP2	23	3.12504	0.00301724	0.0584447
HLA-B	-0.611547	-0.326088	-3.08881	0.00336605	0.0634449	-2.12855	HLA-B	116	-3.12287	0.00303573	0.058644
UGT8	1.05559	-0.0140405	3.11449	0.00313265	0.0613369	-2.06301	UGT8	2	3.12261	0.00303801	0.058644
TRIP10	-0.516247	-0.290717	-3.09184	0.00333769	0.0632297	-2.12084	TRIP10	47	-3.1211	0.00305091	0.0587918
TYSND1	0.446302	-0.0149514	3.11211	0.00315358	0.0613369	-2.06908	TYSND1	14	3.11811	0.00307668	0.0591516
LBR	-0.267675	0.0936146	-3.04286	0.00382486	0.0688578	-2.24494	LBR	170	-3.11771	0.00308015	0.0591516
LCMT1	0.233066	-0.0375989	3.07649	0.00348364	0.0650792	-2.15985	LCMT1	45	3.11588	0.00309608	0.0593556
FDX1	0.353218	-0.129173	3.12361	0.00305347	0.0604731	-2.03963	FDX1	13	3.11458	0.00310739	0.0594706
LDLR	-0.458475	-0.316276	-3.0896	0.00335856	0.0634449	-2.12652	LDLR	30	-3.11224	0.00312793	0.0597617
KIRREL1	-0.776323	0.120292	-3.11849	0.00309773	0.0609528	-2.05277	KIRREL1	2	-3.11143	0.00313508	0.0597962
CDC42EP4	-0.820868	-0.298792	-3.10241	0.00324043	0.0622297	-2.09387	CDC42EP4	3	-3.10635	0.0031801	0.0605517
GUCY1B1	-0.926106	-0.377219	-3.08218	0.00342884	0.0644116	-2.1454	GUCY1B1	11	-3.10218	0.00321757	0.061076
ADAT2	0.315057	-0.00202477	3.15269	0.00281347	0.0573763	-1.96485	ADAT2	7	3.10194	0.00321977	0.061076
PARP10	-0.428016	-0.072309	-3.07608	0.00348763	0.0650792	-2.16089	PARP10	34	-3.10073	0.00323069	0.061076
DNM2	-0.334118	0.201	-3.0422	0.00383185	0.0688578	-2.2466	DNM2	181	-3.09983	0.00323887	0.061076
SHROOM1	1.35978	-0.461555	3.11621	0.0033361	0.0632297	-2.04075	SHROOM1	1	3.12281	0.00324363	0.061076
KHDC4	0.174655	0.084977	3.07033	0.00354391	0.0657205	-2.17548	KHDC4	37	3.09887	0.00324759	0.061076
FAM117A	-0.45109	-0.0677671	-3.09564	0.0033024	0.0628805	-2.11115	FAM117A	12	-3.09862	0.00324987	0.061076
SLC4A7	0.509108	-0.0890786	3.06398	0.00360708	0.0664225	-2.19157	SLC4A7	81	3.09847	0.00325128	0.061076
PDE4B	-0.989487	0.278198	-3.16485	0.00314564	0.0613369	-1.9606	PDE4B	1	-3.1461	0.00326557	0.0612417
CPQ	-0.820387	-0.0274359	-3.0967	0.00329265	0.062849	-2.10845	CPQ	2	-3.0935	0.00329685	0.0617025
PDCL	0.244107	-0.0316922	3.12255	0.00306254	0.0604731	-2.04234	PDCL	16	3.09284	0.00330292	0.0617025
NIBAN1	-1.02675	-0.216009	-3.06642	0.00358274	0.066083	-2.18541	NIBAN1	39	-3.09244	0.00330667	0.0617025
WDFY3	-1.2561	-0.173488	-3.07683	0.00348034	0.0650792	-2.15899	WDFY3	2	-3.09037	0.00332593	0.0619585
PRKCQ	0.344472	-0.56992	3.05035	0.00374625	0.0682	-2.22604	PRKCQ	55	3.0868	0.0033593	0.0624764
FKBP7	0.545901	0.0581767	3.06961	0.00355104	0.0657205	-2.17731	FKBP7	14	3.08244	0.00340053	0.0629613
HACL1	0.543772	-0.0623934	3.05984	0.00364885	0.0669713	-2.20206	HACL1	28	3.08237	0.00340117	0.0629613
PGM1	0.502408	0.068352	3.04165	0.00383764	0.0688578	-2.24797	PGM1	206	3.08187	0.00340592	0.0629613
MYRIP	-1.18895	0.293975	-3.10549	0.00347972	0.0650792	-2.12826	MYRIP	1	-3.10937	0.00340787	0.0629613
PCCA	0.776141	0.038913	3.04645	0.00378702	0.0687187	-2.23589	PCCA	64	3.07482	0.00347375	0.0640727
BEND3	0.260131	-0.0227452	3.02154	0.00405709	0.0718722	-2.29854	BEND3	66	3.07236	0.00349772	0.0644086
GID4	0.160123	0.00933618	3.22027	0.00232259	0.0516972	-1.78935	GID4	13	3.07142	0.00350685	0.0644708
CBR1	-1.36958	0.428681	-3.04148	0.00383948	0.0688578	-2.24841	CBR1	33	-3.06687	0.00355165	0.0651874
XK	1.72822	-0.040422	3.17259	0.00384389	0.0688578	-2.06747	XK	1	3.19392	0.00356323	0.0652928
LARS2	0.34266	0.0474027	3.02384	0.00403142	0.071644	-2.29277	LARS2	66	3.06386	0.00358161	0.0654486
AGO2	-0.321887	0.190747	-3.02274	0.00404372	0.0717488	-2.29554	AGO2	62	-3.06319	0.00358827	0.0654486
ZCRB1	0.315646	-0.108338	3.09659	0.00329365	0.062849	-2.10873	ZCRB1	9	3.06309	0.00358927	0.0654486
MRPS30	-0.359328	0.0404689	-3.03131	0.00394908	0.0705165	-2.27401	MRPS30	36	-3.05668	0.00365394	0.0665195
CASZ1	0.724946	-0.147871	3.06174	0.00362962	0.0667278	-2.19724	CASZ1	2	3.05143	0.00370776	0.0673898
AASDH	0.432153	0.0196619	3.04397	0.00381307	0.0688578	-2.24213	AASDH	14	3.04944	0.0037283	0.0676278
APOBEC3B	0.90531	-0.653786	3.03203	0.00394119	0.0704881	-2.27219	APOBEC3B	7	3.04891	0.00373379	0.0676278
KCTD7	-0.862264	0.103451	-3.2261	0.00317813	0.0615612	-1.85734	KCTD7	1	-3.15412	0.00373898	0.0676278
COPG2	0.276592	-0.0433087	2.9824	0.00451814	0.0772292	-2.3963	COPG2	130	3.04599	0.00376425	0.0679439
REC8	0.878268	-0.518137	3.04427	0.00380992	0.0688578	-2.24138	REC8	2	3.04558	0.00376859	0.0679439
IKZF1	0.468309	-0.0481771	3.00653	0.00422847	0.0738988	-2.33614	IKZF1	98	3.04325	0.00379299	0.0682048
MICALL1	-0.310617	0.204544	-3.00367	0.00426191	0.0740937	-2.34329	MICALL1	58	-3.04304	0.00379525	0.0682048
ZNF646	0.232295	0.119251	3.00264	0.00427399	0.0741885	-2.34586	ZNF646	45	3.04053	0.00382179	0.0685717
PSMB5	0.532088	-0.146956	3.00851	0.00420546	0.0738988	-2.33118	PSMB5	46	3.03643	0.00386555	0.069082
SYK	-0.656084	0.494786	-3.00632	0.0042309	0.0738988	-2.33666	SYK	79	-3.03642	0.00386564	0.069082
MRPL18	-0.238878	0.0457568	-3.15888	0.00276473	0.0570054	-1.94887	MRPL18	6	-3.03613	0.00386874	0.069082
PTPMT1	0.359926	0.1994	3.0283	0.00398206	0.0708793	-2.28157	PTPMT1	19	3.0354	0.00387664	0.0691128
ELFN2	-1.21009	0.0222324	-3.01621	0.00411717	0.0727064	-2.3119	ELFN2	3	-3.03214	0.00391177	0.0694594
TM7SF2	0.530198	0.258454	3.11315	0.00314445	0.0613369	-2.06644	TM7SF2	1	3.03188	0.00391459	0.0694594
PALD1	-0.832291	0.147799	-3.00705	0.00422241	0.0738988	-2.33483	PALD1	33	-3.03188	0.00391469	0.0694594
HNRNPLL	0.857496	-0.725883	3.00382	0.00426007	0.0740937	-2.3429	HNRNPLL	52	3.03053	0.00392934	0.069609
MDM2	0.898142	-0.00918815	3.00838	0.00420697	0.0738988	-2.33151	MDM2	16	3.02987	0.00393648	0.0696253
ZFP82	0.629853	-0.0436192	3.01646	0.00411434	0.0727064	-2.31128	ZFP82	9	3.02769	0.00396039	0.0698879
GCSH	0.45206	0.104805	3.00997	0.00418856	0.0738506	-2.32752	GCSH	23	3.02738	0.00396381	0.0698879
TMEM128	0.538826	-0.239231	3.04662	0.00378515	0.0687187	-2.23544	TMEM128	3	3.02421	0.00399869	0.0702439
NELFE	-0.148871	0.0179828	-2.91907	0.00536929	0.0872491	-2.55267	NELFE	72	-3.02421	0.00399877	0.0702439
HEBP2	0.579787	0.0682675	3.00444	0.0042529	0.0740937	-2.34137	HEBP2	20	3.02333	0.00400842	0.0702439
PIGM	0.572274	0.148247	3.05444	0.00370399	0.0676506	-2.21571	PIGM	2	3.02327	0.0040091	0.0702439
RPIA	0.2746	0.00506143	2.98585	0.00447567	0.0769048	-2.38772	RPIA	48	3.02219	0.00402119	0.0702765
FNTA	-0.234981	0.105573	-2.97253	0.00464192	0.0787156	-2.42081	FNTA	58	-3.02157	0.00402806	0.0702765
APP	0.694899	0.0991416	3.0011	0.00429212	0.0743879	-2.34971	APP	18	3.02105	0.00403384	0.0702765
BOLA1	-0.430232	-0.222397	-3.02883	0.00397619	0.0708793	-2.28023	BOLA1	8	-3.02085	0.00403607	0.0702765
UQCRB	-0.310078	0.0888673	-2.9793	0.00455678	0.0776525	-2.40402	UQCRB	55	-3.01678	0.00408176	0.0709617
DCTD	0.330642	0.133984	3.00666	0.00422691	0.0738988	-2.3358	DCTD	21	3.01418	0.00411121	0.071363
PRCP	0.623644	0.0898375	2.99277	0.00439148	0.0759626	-2.37049	PRCP	19	3.01199	0.00413623	0.0716861
IKZF5	0.361381	-0.0159078	3.13064	0.00299373	0.0598947	-2.02159	IKZF5	2	3.01006	0.00415825	0.0719563
IL4R	-0.778163	-0.0210215	-3.11476	0.00371871	0.0678089	-2.10253	IL4R	1	-3.06442	0.00418836	0.0723655
ADSL	0.243722	-0.0880332	2.93019	0.00520982	0.0861583	-2.52538	ADSL	154	3.00598	0.00420541	0.0725483
EFNB1	-1.00948	0.0894656	-2.98367	0.00450253	0.077198	-2.39315	EFNB1	8	-3.00286	0.00424177	0.0730628
SPA17	0.863927	-0.200713	2.99065	0.00441713	0.0762007	-2.37578	SPA17	4	3.00136	0.00425938	0.073194
MRPL57	-0.303628	0.0173042	-3.04215	0.00383238	0.0688578	-2.24672	MRPL57	8	-3.00081	0.00426579	0.073194
CLEC2B	-1.21607	0.247728	-2.98035	0.00454365	0.0775468	-2.4014	CLEC2B	6	-3.00021	0.00427285	0.073194
RNF213	-0.395931	-0.210339	-2.94885	0.00495198	0.0832231	-2.47942	RNF213	558	-2.99987	0.00427682	0.073194
DMXL2	-0.554735	-0.145644	-2.97211	0.00464729	0.0787156	-2.42186	DMXL2	46	-2.99943	0.00428207	0.073194
BANK1	-1.42945	0.0558116	-2.97229	0.00464506	0.0787156	-2.42142	BANK1	15	-2.99569	0.00432641	0.0738392
HPSE	-1.24226	0.60357	-2.97725	0.00458234	0.0779695	-2.4091	HPSE	3	-2.99368	0.00435042	0.0741359
GFOD2	0.231183	0.0648699	3.18685	0.00255429	0.0549958	-1.87645	GFOD2	4	2.99307	0.00435773	0.0741476
MCCC2	0.323801	0.189454	2.9395	0.00507968	0.085026	-2.50248	MCCC2	85	2.98426	0.00446463	0.0758512
PCM1	0.236695	-0.186066	2.89619	0.00571191	0.0903361	-2.60859	PCM1	253	2.98232	0.00448855	0.0761421
MAP1S	-0.317155	0.315158	-2.93469	0.00514643	0.0856159	-2.5143	MAP1S	68	-2.97561	0.00457196	0.0773848
RGS14	-0.398008	-0.203239	-2.94955	0.00494258	0.0832138	-2.4777	RGS14	38	-2.97532	0.00457563	0.0773848
ST7	-0.695137	-0.234204	-2.98293	0.00451167	0.0772292	-2.39499	ST7	2	-2.97177	0.00462048	0.0780255
ACAT2	0.290471	-0.167293	2.91385	0.0054458	0.0881086	-2.56546	ACAT2	128	2.97057	0.00463569	0.0781645
NME4	-0.441546	0.128043	-2.97002	0.004674	0.0789952	-2.42706	NME4	9	-2.96773	0.00467191	0.0786091
OXNAD1	0.373044	0.0391325	2.96971	0.00467791	0.0789952	-2.42782	OXNAD1	13	2.9674	0.0046761	0.0786091
NAPRT	-0.806298	0.163927	-2.93927	0.00508283	0.085026	-2.50304	NAPRT	38	-2.96421	0.00471719	0.0791809
PDXDC1	0.299977	-0.0131633	2.90497	0.00557806	0.0896011	-2.58716	PDXDC1	107	2.95635	0.00481981	0.0807823
GIPC1	-0.304923	-0.165567	-2.93787	0.00510224	0.0851337	-2.5065	GIPC1	28	-2.95362	0.00485584	0.0811334
MRPL28	-0.369105	-0.0249848	-2.93223	0.00518106	0.0859365	-2.52037	MRPL28	31	-2.95327	0.00486049	0.0811334
ZSCAN29	0.254802	0.0326187	3.06707	0.00357625	0.066072	-2.18375	ZSCAN29	5	2.95248	0.00487108	0.0811334
DHX40	0.269567	0.0766488	2.91425	0.00543986	0.0881086	-2.56447	DHX40	52	2.95231	0.00487325	0.0811334
MXRA7	-1.11995	0.0932699	-2.93088	0.00520008	0.0861244	-2.52369	MXRA7	11	-2.95203	0.00487699	0.0811334
MTX2	0.566562	-0.162467	2.9275	0.00524793	0.0865264	-2.53198	MTX2	32	2.95091	0.00489202	0.0812626
PTPN7	0.714204	-0.419522	2.92518	0.00528109	0.0865264	-2.53768	PTPN7	40	2.95036	0.00489937	0.0812642
KSR1	-0.597839	-0.335818	-2.93539	0.00513675	0.0855819	-2.5126	KSR1	10	-2.94681	0.00494703	0.0819333
KCTD12	-1.2933	0.322577	-2.92454	0.00529023	0.0865264	-2.53925	KCTD12	9	-2.94605	0.00495733	0.081956
AC092835.1	0.662868	-0.188661	3.02348	0.00439655	0.0759626	-2.33637	AC092835.1	1	2.97427	0.00496474	0.081956
TYK2	-0.279466	-0.000665828	-2.91852	0.00537738	0.0872538	-2.55403	TYK2	38	-2.94498	0.00497186	0.081956
ARID1B	-0.294624	0.228881	-2.89157	0.00578361	0.0905123	-2.61986	ARID1B	114	-2.94455	0.00497768	0.081956
ZDHHC13	0.389969	-0.0617919	2.93888	0.0050882	0.085026	-2.504	ZDHHC13	15	2.94328	0.00499503	0.0821129
SNAP47	-0.28712	-0.0112013	-2.9593	0.00481285	0.0811516	-2.4536	SNAP47	14	-2.94277	0.00500187	0.0821129
CHMP4B	0.246275	-0.082092	2.87005	0.00612825	0.0937321	-2.67212	CHMP4B	148	2.94038	0.00503462	0.0825294
VSIG10	-0.649396	0.386317	-3.02139	0.00447856	0.0769048	-2.34956	VSIG10	1	-2.96772	0.00511161	0.083669
MCRS1	0.15762	-0.0246492	2.92572	0.00527341	0.0865264	-2.53636	MCRS1	31	2.93087	0.00516674	0.0843989
ATG2A	-0.244447	0.0638365	-2.90122	0.00563498	0.0901274	-2.59634	ATG2A	40	-2.93055	0.00517128	0.0843989
SNX10	1.01649	-1.10653	2.92135	0.00533621	0.0868669	-2.54707	SNX10	2	2.92983	0.0051815	0.0844425
AC002316.1	0.631356	-0.0487268	2.90286	0.00560996	0.0899677	-2.59231	AC002316.1	43	2.9285	0.00520024	0.0846249
SURF2	-0.482585	-0.217266	-2.93357	0.00516219	0.0857506	-2.51707	SURF2	6	-2.92722	0.00521834	0.0846859
METTL22	0.55425	0.228904	2.9896	0.00442983	0.0763021	-2.37838	METTL22	1	2.92697	0.0052219	0.0846859
FAM114A1	-0.968041	0.357546	-2.99315	0.004958	0.0832231	-2.30937	FAM114A1	1	-2.96884	0.00522668	0.0846859
NEDD4	-0.53239	-0.209949	-2.89796	0.00568473	0.0903361	-2.60428	NEDD4	52	-2.92572	0.00523975	0.0847748
GATD1	0.191366	0.109913	2.9024	0.00561695	0.0899677	-2.59344	GATD1	35	2.92416	0.00526203	0.0849026
LYL1	-0.732396	0.447487	-2.92961	0.00521802	0.0861665	-2.52681	LYL1	2	-2.92324	0.00527521	0.0849026
CD48	0.876787	-0.421715	2.90029	0.00564914	0.090225	-2.5986	CD48	24	2.92296	0.00527917	0.0849026
RIPK1	-0.307103	-0.0225081	-2.88199	0.00593465	0.091774	-2.64314	RIPK1	69	-2.92296	0.00527922	0.0849026
PLXNB2	-0.607356	0.602031	-2.89249	0.00576921	0.0905123	-2.61761	PLXNB2	91	-2.92252	0.00528556	0.0849026
HDAC1	0.163161	0.0066282	2.79116	0.00756162	0.106625	-2.86138	HDAC1	170	2.92024	0.00531835	0.085285
CMTM4	-1.24723	0.121323	-3.09219	0.00530163	0.0865264	-2.26067	CMTM4	1	-3.07882	0.0053246	0.085285
DENND4C	-0.343925	0.0109558	-2.87805	0.00599798	0.0923706	-2.65273	DENND4C	86	-2.91908	0.00533522	0.085333
RAD54L2	0.188941	0.039133	2.84645	0.00652818	0.0970209	-2.72913	RAD54L2	72	2.91599	0.00538006	0.0858199
MPI	-0.491131	0.388942	-2.88404	0.00590209	0.0913966	-2.63817	MPI	75	-2.91549	0.00538737	0.0858199
CCM2	-0.620752	0.124048	-2.89036	0.0058025	0.0906064	-2.62281	CCM2	40	-2.91541	0.00538866	0.0858199
PDE4DIP	0.435832	-0.00253951	2.88048	0.00595878	0.09202	-2.64681	PDE4DIP	73	2.91355	0.00541579	0.0861296
ZNF711	0.878915	-0.555172	2.89557	0.0057215	0.0903361	-2.61011	ZNF711	7	2.91196	0.00543931	0.0863809
SCAI	0.268048	-0.08392	2.87823	0.005995	0.0923706	-2.65228	SCAI	42	2.90828	0.00549376	0.087122
USP53	-1.21468	-0.0590845	-2.94039	0.00554603	0.0893429	-2.41994	USP53	1	-2.93829	0.00552424	0.0874814
MDM1	0.352396	0.133475	2.89585	0.00571717	0.0903361	-2.60942	MDM1	20	2.90487	0.00554488	0.0876843
DAAM1	0.69143	0.0138873	2.87714	0.00601266	0.0924694	-2.65493	DAAM1	56	2.90365	0.00556325	0.087822
AGL	0.36523	-0.231977	2.85931	0.00630727	0.0955564	-2.69809	AGL	131	2.90271	0.00557735	0.087822
TRIM14	-0.561627	-0.755722	-2.89126	0.00578839	0.0905123	-2.62061	TRIM14	11	-2.90236	0.00558268	0.087822
ATP13A2	-0.505846	0.120959	-2.92582	0.00527193	0.0865264	-2.53611	ATP13A2	3	-2.90221	0.00558496	0.087822
CD99	-0.838492	-0.167983	-2.87553	0.00603863	0.0927414	-2.65882	CD99	44	-2.90047	0.00561132	0.0881126
NUDT7	-0.600965	0.229294	-2.89252	0.00576868	0.0905123	-2.61753	NUDT7	6	-2.89756	0.00565569	0.088685
ZKSCAN4	0.313461	0.0376107	2.91106	0.00548705	0.0885203	-2.57229	ZKSCAN4	11	2.89292	0.00572703	0.089297
EZR	-0.456363	-0.0563557	-2.85229	0.00642696	0.0960237	-2.71504	EZR	333	-2.89274	0.00572992	0.089297
GNAQ	-0.434433	-0.295194	-2.86803	0.00616157	0.0937581	-2.67701	GNAQ	37	-2.89249	0.0057337	0.089297
PDCD5	0.282085	-0.143281	2.84791	0.00650273	0.0968145	-2.72561	PDCD5	71	2.89173	0.00574549	0.089297
SPNS3	1.19792	-0.541674	2.88477	0.00589043	0.0913425	-2.63639	SPNS3	1	2.89153	0.00574863	0.089297
MAN1A1	-1.1122	-0.0837705	-2.87008	0.00612779	0.0937321	-2.67205	MAN1A1	12	-2.89115	0.00575455	0.089297
RHOB	0.740386	0.0239943	2.89587	0.00571683	0.0903361	-2.60937	RHOB	2	2.8909	0.00575844	0.089297
AJUBA	-0.615053	0.58792	-2.88491	0.00588816	0.0913425	-2.63604	AJUBA	6	-2.89089	0.00575853	0.089297
CYTH3	-0.610222	0.251802	-2.88633	0.00586583	0.0912544	-2.63261	CYTH3	5	-2.88895	0.0057888	0.0896424
SSBP2	0.542957	0.509884	2.89144	0.00578552	0.0905123	-2.62016	SSBP2	5	2.88836	0.00579813	0.0896628
GMDS	0.302567	-0.0231456	2.84219	0.00660282	0.0976554	-2.73937	GMDS	83	2.88641	0.00582873	0.0900116
GUK1	-0.353661	-0.0462874	-2.85557	0.00637078	0.0958747	-2.70713	GUK1	47	-2.88509	0.00584952	0.0900576
MTR	-0.256599	0.0147631	-2.82679	0.00687958	0.100529	-2.77636	MTR	108	-2.88484	0.00585338	0.0900576
HPGD	1.16498	-2.43324	2.865	0.00621184	0.0943661	-2.68434	HPGD	7	2.88469	0.00585583	0.0900576
B4GALT4	0.496273	-0.214569	2.9238	0.00530084	0.0865264	-2.54106	B4GALT4	2	2.88248	0.00589077	0.0904631
RAG2	-0.974851	0.148188	-2.86792	0.00616344	0.0937581	-2.67729	RAG2	4	-2.88201	0.00589836	0.0904631
ZNF655	0.206123	0.0369307	2.92486	0.00528568	0.0865264	-2.53847	ZNF655	15	2.87962	0.00593651	0.0909236
GNA13	-0.484271	0.0289507	-2.85197	0.00643246	0.0960237	-2.71581	GNA13	48	-2.87908	0.00594513	0.0909313
EIF2AK3	0.519455	0.138468	2.85934	0.00630679	0.0955564	-2.69802	EIF2AK3	23	2.87824	0.00595857	0.0910124
JUP	-0.632815	0.208202	-2.8579	0.00633119	0.0955625	-2.70151	JUP	16	-2.87538	0.00600464	0.091537
IFT74	-0.695059	-0.00894278	-2.85116	0.00644649	0.096105	-2.71778	IFT74	36	-2.8751	0.00600926	0.091537
MYH14	-0.326315	0.0889589	-2.87093	0.00611379	0.0937321	-2.66999	MYH14	18	-2.87431	0.00602205	0.0916072
ATL3	-0.383163	0.222012	-2.83081	0.00680643	0.100006	-2.76673	ATL3	165	-2.87348	0.0060355	0.0916204
MSL3	0.220031	0.143455	2.8951	0.00572871	0.0903361	-2.61124	MSL3	18	2.87325	0.00603929	0.0916204
FKBP15	-0.351452	0.110118	-2.8282	0.0068538	0.100435	-2.77298	FKBP15	137	-2.87267	0.00604862	0.0916379
SUOX	0.630028	-0.270418	2.91114	0.00548588	0.0885203	-2.57209	SUOX	1	2.87216	0.0060569	0.0916393
TRIM2	-0.733398	-0.168999	-2.86812	0.00615999	0.0937581	-2.67678	TRIM2	3	-2.87034	0.00608676	0.0919668
CSAD	-0.792831	0.175323	-2.92929	0.00570963	0.0903361	-2.51342	CSAD	1	-2.89833	0.00613465	0.0925655
FDFT1	0.435738	-0.612615	2.82772	0.00686252	0.100435	-2.77412	FDFT1	96	2.86234	0.00621916	0.0937143
FAM118A	-0.528306	0.316416	-2.84463	0.00655996	0.0971499	-2.73351	FAM118A	17	-2.86008	0.00625705	0.0941314
DSTN	0.580936	-0.178691	2.83162	0.00679174	0.0999215	-2.76478	DSTN	64	2.85938	0.00626868	0.0941314
MMP24OS	-0.648233	-0.0798792	-2.89342	0.00575483	0.0905123	-2.61535	MMP24OS	1	-2.85877	0.00627906	0.0941314
GPAT4	-0.33505	0.141118	-2.85778	0.00633327	0.0955625	-2.7018	GPAT4	16	-2.85869	0.00628047	0.0941314
IFT81	-0.567628	0.226536	-2.82639	0.00688688	0.100529	-2.77731	IFT81	40	-2.851	0.00641141	0.0959655
OTUD1	-0.585583	0.276324	-2.89679	0.00570272	0.0903361	-2.60714	OTUD1	1	-2.84912	0.00644374	0.0961975
JARID2	0.482704	-0.00739073	2.82807	0.00685623	0.100435	-2.77329	JARID2	29	2.8491	0.0064441	0.0961975
KIF3C	-0.397721	0.124232	-2.84612	0.00653392	0.0970209	-2.72992	KIF3C	12	-2.84703	0.00647991	0.0966033
MLYCD	0.521427	0.27918	2.82277	0.00695354	0.101238	-2.78598	MLYCD	30	2.84453	0.00652341	0.0970246
FAM204A	0.240818	-0.00625209	2.89592	0.00571611	0.0903361	-2.60925	FAM204A	10	2.84441	0.0065255	0.0970246
BTBD6	0.821097	-0.12715	2.8551	0.00637884	0.0958747	-2.70827	BTBD6	1	2.84336	0.00654391	0.0971693
DUSP16	1.03118	-0.683695	2.9313	0.00638947	0.0958935	-2.50237	DUSP16	1	2.91113	0.00662692	0.0982714
LDLRAD4	0.579668	-0.0492289	2.85878	0.00631636	0.0955625	-2.69939	LDLRAD4	2	2.8372	0.00665269	0.0985232
CASKIN2	-0.468377	0.142815	-2.81651	0.0070703	0.102671	-2.80097	CASKIN2	25	-2.8353	0.0066866	0.0988945
C9orf78	0.218567	-0.399693	2.7752	0.00788706	0.109298	-2.89922	C9orf78	81	2.83425	0.00670534	0.0990409
AASS	1.04487	0.187513	2.80855	0.00722133	0.104188	-2.81998	AASS	57	2.83314	0.00672539	0.0990985
PALB2	0.255079	-0.0410895	2.8341	0.00674687	0.099523	-2.75882	PALB2	21	2.83305	0.00672694	0.0990985
FAM49A	-0.770605	0.380453	-2.81216	0.00715244	0.103595	-2.81136	FAM49A	15	-2.8312	0.00676018	0.0994572
LAMC1	-0.756827	0.185334	-2.81038	0.00718644	0.103842	-2.81563	LAMC1	15	-2.82924	0.00679567	0.0998482
PRXL2A	0.902226	0.162091	2.80639	0.00726284	0.104518	-2.82514	PRXL2A	24	2.82852	0.0068088	0.0999099
TDP2	0.259273	0.00846989	2.79477	0.00748981	0.106147	-2.8528	TDP2	46	2.82719	0.00683309	0.100135
PPP1R3G	-1.46279	0.813582	-2.85127	0.00724658	0.104418	-2.76898	PPP1R3G	1	-2.86722	0.00688818	0.100811
CBLB	0.681536	-0.0398311	2.80208	0.00734634	0.105179	-2.83542	CBLB	24	2.82309	0.00690816	0.100841
TRIM65	-0.237867	-0.0173283	-2.79722	0.00744139	0.106047	-2.84697	TRIM65	38	-2.82309	0.00690828	0.100841
NT5M	0.585524	0.0824109	2.86793	0.00616312	0.0937581	-2.67724	NT5M	1	2.82209	0.00692663	0.100969
PSPH	0.387512	-0.00578352	2.79618	0.00746193	0.106047	-2.84945	PSPH	40	2.82144	0.00693859	0.100969
KIAA0513	-0.96057	-0.120829	-2.829	0.00718806	0.103842	-2.73486	KIAA0513	3	-2.83939	0.00694409	0.100969
SDC1	1.61553	-0.636305	2.80562	0.00727776	0.104598	-2.82698	SDC1	1	2.82031	0.00695955	0.101062
MBOAT2	-0.771249	-0.317194	-2.80329	0.00732285	0.104976	-2.83254	MBOAT2	6	-2.81615	0.00703723	0.102058
KLHL42	0.388745	-0.133169	2.83296	0.00676744	0.099695	-2.76156	KLHL42	6	2.81404	0.00707685	0.1025
KLHL7	0.359348	-0.182419	2.80053	0.00737645	0.10534	-2.83909	KLHL7	22	2.81299	0.00709662	0.102653
DISC1	-0.420732	0.0930394	-2.82139	0.00697921	0.101479	-2.7893	DISC1	6	-2.80894	0.00717349	0.103565
ADD1	0.35606	-0.0152897	2.76726	0.00805374	0.111183	-2.91799	ADD1	127	2.8087	0.00717816	0.103565
XRN2	0.113111	-0.0344211	2.5729	0.013295	0.146795	-3.36516	XRN2	277	2.80557	0.00723814	0.104216
SPARC	-1.01481	-0.0942314	-2.80689	0.00748147	0.106147	-2.8376	SPARC	2	-2.81678	0.00724186	0.104216
ORAI3	0.650191	0.0423007	2.85667	0.00662349	0.0978319	-2.72333	ORAI3	1	2.81931	0.00725459	0.104265
PDGFRB	-0.817132	0.378653	-2.78022	0.00778337	0.108513	-2.88734	PDGFRB	28	-2.80253	0.00729683	0.104701
HDGFL3	1.17461	0.020249	2.78015	0.00778472	0.108513	-2.88749	HDGFL3	19	2.80217	0.00730365	0.104701
FLI1	-0.556663	0.272154	-2.77469	0.00789767	0.109298	-2.90043	FLI1	41	-2.79904	0.00736473	0.105442
SMPDL3B	1.26507	-0.398796	2.83278	0.00759515	0.106963	-2.75442	SMPDL3B	1	2.84012	0.00738241	0.10556
AP1S1	0.28863	-0.073599	2.80451	0.00729921	0.104772	-2.82963	AP1S1	15	2.79608	0.00742274	0.106001
IL1B	-1.33513	0.119455	-2.79787	0.00765994	0.107732	-2.79869	IL1B	1	-2.80687	0.00743282	0.10601
VPS16	-0.196462	0.0819139	-2.73897	0.00867427	0.116729	-2.98454	VPS16	64	-2.79388	0.00746613	0.10635
CHD2	0.214855	0.178937	2.73029	0.00887342	0.11827	-3.00487	CHD2	94	2.7934	0.0074758	0.106352
ANO8	0.449934	0.0191152	2.88616	0.00586845	0.0912544	-2.63301	ANO8	1	2.79271	0.00748947	0.106364
CMIP	-0.414841	-0.038384	-2.77884	0.00781182	0.108513	-2.89062	CMIP	20	-2.7924	0.00749565	0.106364
BRMS1	0.200856	0.0631687	2.78583	0.00766902	0.107732	-2.87405	BRMS1	28	2.79177	0.00750817	0.106407
L3HYPDH	-0.728263	-0.100697	-2.77954	0.00779727	0.108513	-2.88894	L3HYPDH	6	-2.79121	0.00751918	0.106428
ZBTB39	0.202471	0.112231	2.90511	0.005576	0.0896011	-2.58682	ZBTB39	7	2.78853	0.00757276	0.107051
IFT46	-0.436386	0.0847137	-2.7962	0.00746165	0.106047	-2.84942	IFT46	6	-2.78692	0.00760518	0.107374
RBM12B	0.1583	0.0712732	2.67008	0.0103741	0.12807	-3.14453	RBM12B	152	2.78614	0.00762087	0.10746
MAPK1	-0.173557	0.0589353	-2.70019	0.00959672	0.123217	-3.07497	MAPK1	99	-2.78551	0.00763354	0.107503
DNAJC19	0.244005	-0.0217167	2.81464	0.00710549	0.103048	-2.80543	DNAJC19	13	2.78483	0.00764728	0.107562
RCC2	0.153112	0.150812	2.64071	0.0111881	0.134981	-3.21186	RCC2	295	2.78292	0.00768604	0.107803
EIF5	0.181022	-0.088312	2.68315	0.0100299	0.126316	-3.11442	EIF5	180	2.78249	0.00769498	0.107803
RMND5A	0.259228	0.0966545	2.75639	0.00828718	0.113566	-2.94362	RMND5A	39	2.78241	0.00769653	0.107803
SVIL	0.406969	0.044621	2.75072	0.00841139	0.114428	-2.95696	SVIL	69	2.78209	0.00770297	0.107803
IGHV6-1	2.42589	-1.51809	2.78566	0.00827815	0.113566	-2.90678	IGHV6-1	1	2.8096	0.00772254	0.107914
PRDX2	0.862425	-0.126474	2.75363	0.00834732	0.114208	-2.95011	PRDX2	282	2.78076	0.00773015	0.107914
ZNF606	0.674888	0.06318	2.77981	0.00779183	0.108513	-2.88832	ZNF606	3	2.77966	0.00775264	0.108093
ALDH4A1	0.458767	0.346627	2.74831	0.00846467	0.114734	-2.96262	ALDH4A1	67	2.77763	0.00779437	0.108539
STRBP	0.317049	0.187516	2.72759	0.00893609	0.118541	-3.01117	STRBP	177	2.77593	0.00782947	0.108793
IGF2R	0.341769	-0.0864013	2.72845	0.0089161	0.118541	-3.00917	IGF2R	257	2.77581	0.00783204	0.108793
PLEKHA5	-0.859748	-0.37764	-2.75249	0.00837239	0.114208	-2.9528	PLEKHA5	25	-2.77427	0.00786395	0.109101
FAM168A	-0.327084	0.207521	-2.85251	0.00642319	0.0960237	-2.71451	FAM168A	3	-2.77285	0.00789343	0.10925
ZNF830	0.174113	-0.02498	2.78298	0.0077268	0.108272	-2.88079	ZNF830	25	2.77281	0.0078942	0.10925
FAM169A	0.767731	-0.672179	2.74836	0.00846347	0.114734	-2.9625	FAM169A	34	2.7712	0.00792802	0.109446
COL5A1	-1.00062	-0.268739	-2.76939	0.00800863	0.110697	-2.91295	COL5A1	1	-2.77056	0.00794134	0.109446
AP2S1	-0.169781	0.00745848	-2.76145	0.00817779	0.11248	-2.93171	AP2S1	31	-2.77054	0.00794172	0.109446
GLTP	-0.304336	0.0346879	-2.76656	0.00806852	0.11125	-2.91964	GLTP	19	-2.77027	0.00794742	0.109446
SPART	-1.17462	0.108975	-2.74696	0.00849471	0.114863	-2.9658	SPART	21	-2.76896	0.00797486	0.109689
RMDN2	-1.08532	0.152937	-2.75237	0.0083751	0.114208	-2.95309	RMDN2	4	-2.76835	0.00798779	0.109732
OGT	-0.146942	0.0638891	-2.64114	0.0111756	0.134975	-3.21087	OGT	146	-2.76733	0.00800923	0.109891
HIVEP3	-0.719685	-0.252239	-2.74835	0.00846388	0.114734	-2.96254	HIVEP3	9	-2.76324	0.0080961	0.110905
UTP23	-0.294024	0.154633	-2.76454	0.00811162	0.111707	-2.92442	UTP23	17	-2.76292	0.00810291	0.110905
CYSTM1	0.464073	-0.425693	2.84476	0.00655774	0.0971499	-2.7332	CYSTM1	1	2.76216	0.00811922	0.110937
ZFP62	0.28495	0.0828764	2.79196	0.00754582	0.106554	-2.8595	ZFP62	9	2.76189	0.00812507	0.110937
AK1	-1.38456	0.21809	-2.73897	0.00867438	0.116729	-2.98455	AK1	12	-2.76027	0.00815965	0.111273
PDZD8	0.218395	-0.000317782	2.73069	0.00886413	0.11827	-3.00393	PDZD8	39	2.75755	0.00821835	0.111882
CD9	1.1097	0.245677	2.73368	0.00879516	0.117788	-2.99694	CD9	51	2.75728	0.00822428	0.111882
TPCN1	-1.11315	-0.401703	-2.74115	0.00862496	0.116343	-2.97943	TPCN1	3	-2.75583	0.00825558	0.112172
SURF4	0.221133	-0.25838	2.74127	0.00862213	0.116343	-2.97914	SURF4	30	2.75435	0.00828778	0.112473
MYB	0.437176	-0.103806	2.73554	0.00875244	0.117497	-2.99258	MYB	25	2.7534	0.00830867	0.112505
MYO1B	-1.05523	0.277948	-2.72944	0.00889295	0.118389	-3.00684	MYO1B	59	-2.75333	0.00831024	0.112505
ZNF8	0.209365	0.0834449	2.7939	0.00750718	0.106258	-2.85488	ZNF8	14	2.75276	0.00832258	0.112536
ZNF701	0.422743	0.0860997	2.85505	0.00637966	0.0958747	-2.70838	ZNF701	1	2.7508	0.0083655	0.11298
PRXL2C	-0.746574	-0.145995	-2.80438	0.00781082	0.108513	-2.80051	PRXL2C	1	-2.77391	0.00838303	0.11308
AGPAT3	-0.605627	-0.0639872	-2.72769	0.00893388	0.118541	-3.01095	AGPAT3	20	-2.74625	0.0084662	0.114064
UACA	-0.974991	0.407664	-2.72589	0.00897578	0.118786	-3.01514	UACA	12	-2.7454	0.00848505	0.114181
WDR35	0.928031	-0.560342	2.73617	0.00873811	0.117445	-2.99111	WDR35	2	2.74332	0.00853153	0.114531
MIEF1	0.266686	-0.00605596	2.74699	0.00849411	0.114863	-2.96574	MIEF1	18	2.74297	0.00853952	0.114531
TDRKH	0.366959	-0.339772	2.73074	0.00886281	0.11827	-3.0038	TDRKH	21	2.74287	0.00854177	0.114531
UHRF1BP1L	0.255544	-0.0790189	2.72277	0.00904909	0.119413	-3.02242	UHRF1BP1L	33	2.74215	0.00855795	0.114611
MANEAL	0.363923	0.0271962	2.82428	0.00692583	0.100966	-2.78239	MANEAL	2	2.7402	0.00860175	0.11506
NELFB	-0.163273	0.160282	-2.65076	0.0109032	0.132543	-3.18888	NELFB	96	-2.73866	0.00863661	0.115388
USP38	0.290988	-0.14066	2.72659	0.0089595	0.118711	-3.01352	USP38	25	2.73807	0.0086499	0.115428
TPP2	0.331871	0.0596828	2.68832	0.00989653	0.125483	-3.10246	TPP2	324	2.73701	0.00867396	0.115612
CUL4B	-0.202597	0.0985725	-2.66285	0.0105694	0.129328	-3.16117	CUL4B	123	-2.73532	0.00871257	0.115988
DCUN1D4	0.332003	-0.155186	2.77472	0.00789707	0.109298	-2.90036	DCUN1D4	5	2.73461	0.00872873	0.116065
PSTPIP2	1.29028	-0.776441	2.71241	0.00929677	0.121172	-3.04658	PSTPIP2	14	2.73359	0.00875199	0.116201
ACP1	0.183215	0.0774909	2.66953	0.010389	0.12807	-3.14581	ACP1	74	2.73326	0.00875968	0.116201
ANTKMT	0.699802	-0.578604	2.72108	0.00908908	0.119719	-3.02637	ANTKMT	6	2.73208	0.00878683	0.116423
TBKBP1	-0.608819	0.0917438	-2.71637	0.00920143	0.120773	-3.03736	TBKBP1	13	-2.73129	0.00880497	0.116446
STRADB	0.308755	0.126705	2.79609	0.00746382	0.106047	-2.84968	STRADB	4	2.73097	0.00881236	0.116446
STBD1	0.808968	-0.252939	2.72017	0.00911072	0.119863	-3.0285	STBD1	4	2.73065	0.0088198	0.116446
DOHH	-0.230768	-0.183426	-2.69426	0.00974537	0.124412	-3.08871	DOHH	49	-2.72938	0.00884911	0.116607
DHCR7	0.554393	-0.159385	2.71109	0.00932864	0.121446	-3.04964	DHCR7	21	2.72922	0.00885279	0.116607
PGM2	0.305503	0.279545	2.67902	0.0101374	0.127121	-3.12394	PGM2	200	2.72859	0.00886746	0.116663
PDXK	-0.472963	-0.0581563	-2.70428	0.00949539	0.122619	-3.06549	PDXK	37	-2.72726	0.00889832	0.116868
POLE4	-0.50067	-0.0247478	-2.71915	0.00913493	0.120041	-3.03087	POLE4	10	-2.72702	0.00890395	0.116868
IL2RG	0.516246	-0.611088	2.78353	0.00771563	0.108251	-2.87949	IL2RG	1	2.72528	0.00894452	0.117263
TMEM63B	-0.3901	-0.11781	-2.79189	0.00754709	0.106554	-2.85965	TMEM63B	2	-2.72395	0.00897567	0.117513
ULK4	0.520948	-0.108682	2.78013	0.00778521	0.108513	-2.88755	ULK4	1	2.72354	0.00898531	0.117513
GLI4	-0.382529	0.126111	-2.85325	0.00641056	0.0960237	-2.71274	GLI4	1	-2.72313	0.00899503	0.117513
DENND6A	-0.303144	0.00147611	-2.71494	0.00923571	0.120939	-3.04069	DENND6A	21	-2.72221	0.0090167	0.117658
ZC2HC1A	1.04508	-0.546041	2.70584	0.00945705	0.122406	-3.06187	ZC2HC1A	4	2.72125	0.00903921	0.117815
BOP1	-0.2748	-0.0380665	-2.67173	0.0103303	0.12807	-3.14075	BOP1	111	-2.71976	0.00907439	0.118136
ZNF518B	-0.765564	-0.187853	-2.70861	0.00938896	0.121948	-3.05541	ZNF518B	4	-2.71773	0.00912262	0.118521
PIP5K1C	-0.365861	0.0798471	-2.73247	0.00882297	0.118019	-2.99977	PIP5K1C	7	-2.71753	0.00912752	0.118521
GORASP1	-0.392179	0.127694	-2.76052	0.00819763	0.112614	-2.93388	GORASP1	3	-2.71715	0.00913656	0.118521
HRAS	-0.318728	-0.228781	-2.92123	0.00533801	0.0868669	-2.54738	HRAS	1	-2.71674	0.00914633	0.118521
MRPL45	-0.270748	0.0552429	-2.69468	0.00973489	0.124412	-3.08775	MRPL45	35	-2.71627	0.00915753	0.118529
LENG8	-0.177513	0.224143	-2.67177	0.0103292	0.12807	-3.14066	LENG8	48	-2.71359	0.00922173	0.119222
AFTPH	0.21083	-0.0319908	2.67893	0.01014	0.127121	-3.12417	AFTPH	45	2.71235	0.00925165	0.11925
MRPL34	-0.460728	-0.0413268	-2.75288	0.00836381	0.114208	-2.95188	MRPL34	2	-2.71227	0.00925374	0.11925
PXN	-0.791085	0.0688901	-2.69059	0.00983851	0.125173	-3.09721	PXN	22	-2.71117	0.00928024	0.11925
NDUFS4	-0.350567	0.0809584	-2.70632	0.00944505	0.122392	-3.06073	NDUFS4	16	-2.7111	0.00928186	0.11925
WDR48	0.24322	0.0278873	2.66466	0.0105203	0.129006	-3.15701	WDR48	76	2.71083	0.00928845	0.11925
FHIT	-1.0051	0.0487055	-2.6957	0.00970924	0.124376	-3.08539	FHIT	4	-2.71052	0.00929586	0.11925
MOB3C	-0.459801	0.356382	-2.81661	0.00735693	0.105196	-2.8181	MOB3C	1	-2.72374	0.00929847	0.11925
TSPAN14	-0.506807	0.699061	-2.6993	0.00961902	0.123361	-3.07705	TSPAN14	12	-2.70983	0.00931272	0.119297
PAPOLA	-0.198294	0.175729	-2.66017	0.0106426	0.12994	-3.16732	PAPOLA	60	-2.70831	0.00934977	0.119449
DOCK11	-0.509267	0.399854	-2.6768	0.0101959	0.127546	-3.12907	DOCK11	163	-2.70825	0.0093512	0.119449
CDK2AP1	0.484054	0.0806312	2.70247	0.00954018	0.122772	-3.06969	CDK2AP1	9	2.70803	0.0093566	0.119449
PPAT	0.34807	-0.0027832	2.66834	0.0104209	0.12807	-3.14854	PPAT	106	2.70611	0.00940337	0.119725
RNF168	0.261684	-0.146442	2.68363	0.0100173	0.1263	-3.1133	RNF168	36	2.70606	0.00940471	0.119725
CBFA2T3	-0.694295	-0.101439	-2.68864	0.00988851	0.125483	-3.10174	CBFA2T3	14	-2.70583	0.00941036	0.119725
COL4A2	0.952019	0.114776	2.71821	0.00949012	0.122619	-3.04699	COL4A2	1	2.71745	0.00945014	0.119979
PIP4K2B	-0.206958	0.145433	-2.68013	0.0101085	0.12702	-3.12139	PIP4K2B	37	-2.70395	0.00945649	0.119979
USP40	-0.678993	0.144492	-2.6851	0.00997955	0.126107	-3.10992	USP40	18	-2.70371	0.00946242	0.119979
UQCRQ	-0.278644	0.105697	-2.71355	0.00926908	0.12108	-3.04391	UQCRQ	14	-2.7024	0.00949479	0.12006
SSX2IP	0.379687	-0.467623	2.70277	0.00953253	0.122772	-3.06898	SSX2IP	11	2.70204	0.00950352	0.12006
HAAO	-0.983437	0.0711655	-2.6843	0.0100001	0.126225	-3.11176	HAAO	7	-2.7018	0.00950963	0.12006
CCDC126	0.487633	-0.303116	2.73475	0.00877057	0.117599	-2.99443	CCDC126	2	2.70171	0.00951173	0.12006
PCBD1	0.695727	-0.474517	2.68845	0.00989321	0.125483	-3.10216	PCBD1	7	2.70091	0.00953154	0.120083
NRBP2	-0.719691	0.279587	-2.75117	0.00903786	0.119413	-2.98586	NRBP2	1	-2.72675	0.00954306	0.120083
NDUFS2	-0.210532	0.135201	-2.63424	0.0113751	0.136648	-3.22662	NDUFS2	119	-2.70034	0.00954571	0.120083
SPTLC2	-0.458804	0.023473	-2.67281	0.0103015	0.12807	-3.13826	SPTLC2	50	-2.69852	0.00959101	0.120468
TCP11L1	0.245741	-0.0534157	2.68772	0.00991206	0.125538	-3.10386	TCP11L1	27	2.69825	0.00959784	0.120468
PRKD3	-0.360102	0.180124	-2.69284	0.0097814	0.12473	-3.09201	PRKD3	14	-2.69544	0.00966798	0.121212
THEM6	-0.533285	-0.149909	-2.67061	0.0103601	0.12807	-3.14333	THEM6	30	-2.69146	0.0097685	0.122336
ITPRIPL1	-0.354747	-0.00839631	-2.71315	0.00927888	0.12108	-3.04486	ITPRIPL1	6	-2.69098	0.00978086	0.122354
STC2	-1.26202	0.0354355	-2.69488	0.0100735	0.126722	-3.03941	STC2	1	-2.70305	0.00980575	0.122528
STK17B	-0.448695	-0.180271	-2.67537	0.0102336	0.127874	-3.13236	STK17B	18	-2.68892	0.00983316	0.122734
SS18L2	0.316559	0.111813	2.7096	0.00936504	0.121778	-3.05313	SS18L2	8	2.68849	0.00984417	0.122734
TRIM24	0.199966	-0.0150697	2.62629	0.0116086	0.137776	-3.2447	TRIM24	87	2.68711	0.00987959	0.123039
NOS1	1.62274	-0.611735	2.68319	0.010378	0.12807	-3.12708	NOS1	1	2.69962	0.00989246	0.123062
CCDC97	0.17443	-0.00147552	2.66549	0.0104978	0.128874	-3.1551	CCDC97	34	2.68318	0.00998076	0.124023
ARRB2	-0.517434	0.194444	-2.65621	0.0107516	0.131128	-3.17641	ARRB2	43	-2.67995	0.0100647	0.124927
MEST	-0.647532	0.245346	-2.68531	0.00997413	0.126107	-3.10944	MEST	2	-2.67738	0.0101319	0.125492
CAMK2D	-0.851955	0.397262	-2.65426	0.0108056	0.131642	-3.18087	CAMK2D	45	-2.67721	0.0101362	0.125492
NDUFB3	-0.335569	0.0428982	-2.67155	0.010335	0.12807	-3.14116	NDUFB3	17	-2.67672	0.0101491	0.125492
DYNC1LI2	-0.276775	0.0734907	-2.64931	0.0109439	0.132894	-3.1922	DYNC1LI2	43	-2.67649	0.0101551	0.125492
COA4	0.363635	0.0791172	2.67116	0.0103453	0.12807	-3.14205	COA4	15	2.67607	0.0101662	0.125492
NSUN3	0.31221	0.0921179	2.69498	0.00972718	0.124412	-3.08704	NSUN3	7	2.66804	0.0103796	0.127985
QRSL1	0.275771	-0.0566837	2.64354	0.0111072	0.134435	-3.20539	QRSL1	37	2.66645	0.0104221	0.128368
NRAS	-0.295816	0.151818	-2.71548	0.00922283	0.120912	-3.03944	NRAS	5	-2.66393	0.0104904	0.129066
NCS1	1.36621	-0.689484	2.64344	0.0111099	0.134435	-3.20561	NCS1	5	2.66231	0.0105342	0.129463
BICRAL	0.23533	0.110707	2.71406	0.00925695	0.121076	-3.04274	BICRAL	8	2.65861	0.0106354	0.130564
GLUL	0.486565	-0.58045	2.63617	0.0113189	0.136118	-3.2222	GLUL	28	2.65578	0.0107131	0.131346
ATOX1	-0.209114	0.0424743	-2.63079	0.0114758	0.137559	-3.23446	ATOX1	38	-2.65544	0.0107226	0.131346
CSRNP1	-0.783749	-0.23412	-2.87394	0.00905516	0.119413	-2.7339	CSRNP1	1	-2.7856	0.0108108	0.132281
LCP1	0.328341	-0.148746	2.60022	0.012406	0.142605	-3.30375	LCP1	1317	2.64994	0.0108755	0.132801
IL16	-0.857399	-0.0851343	-2.62731	0.0115784	0.13776	-3.24238	IL16	43	-2.64989	0.010877	0.132801
TWF1	0.249854	-0.040288	2.62264	0.0117173	0.138283	-3.25299	TWF1	39	2.64733	0.0109488	0.133133
SRI	0.308628	-0.0463113	2.61055	0.0120842	0.141078	-3.2804	SRI	81	2.64725	0.0109511	0.133133
PPP3CC	0.461511	0.0538101	2.63058	0.0114819	0.137559	-3.23494	PPP3CC	21	2.64656	0.0109706	0.133133
VPS13A	0.304488	-0.030293	2.60056	0.0123954	0.142605	-3.30299	VPS13A	169	2.64589	0.0109895	0.133133
MBLAC2	0.373961	0.256249	2.62802	0.0115573	0.137654	-3.24076	MBLAC2	28	2.64585	0.0109905	0.133133
FAM92A	0.700354	-0.408196	2.70904	0.0101506	0.127121	-3.02719	FAM92A	1	2.6742	0.010993	0.133133
IDI1	0.299947	0.0857963	2.61556	0.011931	0.139779	-3.26906	IDI1	52	2.64545	0.011002	0.133133
NAV1	-0.916485	0.431876	-2.62251	0.0117212	0.138283	-3.25329	NAV1	47	-2.64519	0.0110093	0.133133
KANK2	-0.769719	0.52069	-2.62411	0.0116736	0.138158	-3.24966	KANK2	27	-2.64501	0.0110144	0.133133
TANC1	0.864958	-0.545849	2.6256	0.011629	0.137776	-3.24626	TANC1	15	2.6447	0.0110231	0.133133
HMGN5	0.671986	-0.519779	2.61815	0.0118525	0.139303	-3.26319	HMGN5	114	2.64419	0.0110375	0.133163
NDUFB7	-0.306253	0.0349601	-2.62583	0.0116223	0.137776	-3.24575	NDUFB7	29	-2.64246	0.0110867	0.133613
ALKBH4	-0.264323	0.0649752	-2.64801	0.0109806	0.133194	-3.19518	ALKBH4	16	-2.64086	0.0111326	0.133961
GATB	0.200716	0.00645797	2.62858	0.0115409	0.137606	-3.2395	GATB	30	2.64002	0.0111565	0.133961
SRC	0.808999	-0.396369	2.62074	0.0117742	0.138616	-3.2573	SRC	17	2.63994	0.0111588	0.133961
CDK5RAP3	-0.361118	-0.016801	-2.60719	0.0121879	0.141699	-3.288	CDK5RAP3	78	-2.63942	0.0111738	0.133961
PACSIN2	-0.20732	0.139551	-2.57341	0.013278	0.146752	-3.36403	PACSIN2	130	-2.63936	0.0111754	0.133961
NMT2	0.70974	-0.280969	2.62082	0.0117719	0.138616	-3.25712	NMT2	14	2.63805	0.0112129	0.134267
FIBP	0.214863	-0.0168134	2.6031	0.0123154	0.142219	-3.29724	FIBP	47	2.63634	0.0112623	0.134714
LZTFL1	0.727812	-0.115561	2.61435	0.0119677	0.140011	-3.27179	LZTFL1	24	2.63452	0.0113152	0.135149
RHBDF2	-0.395463	0.246342	-2.62906	0.0115266	0.137582	-3.23839	RHBDF2	13	-2.63425	0.0113228	0.135149
MYL6B	0.283965	0.163971	2.61757	0.0118698	0.139303	-3.26449	MYL6B	29	2.63331	0.0113502	0.135332
SOCS2	-1.52634	0.205442	-2.61131	0.0120608	0.140953	-3.27868	SOCS2	14	-2.63223	0.0113818	0.135564
POLG	0.20471	0.126371	2.59186	0.0126722	0.143747	-3.3226	POLG	53	2.63102	0.0114171	0.135841
VPS37A	0.184896	0.0526922	2.63894	0.011239	0.135448	-3.2159	VPS37A	23	2.62976	0.0114542	0.136137
TJP2	-0.908689	-0.00860272	-2.63009	0.0114963	0.137559	-3.23605	TJP2	1	-2.62926	0.0114687	0.136165
GIGYF1	-0.241874	0.137554	-2.61003	0.0121003	0.14112	-3.28159	GIGYF1	33	-2.62851	0.0114908	0.136283
PAN2	-0.183244	0.222315	-2.58895	0.0127658	0.14401	-3.32913	PAN2	48	-2.62723	0.0115284	0.136585
DNA2	0.304134	-0.251959	2.59758	0.0124893	0.143175	-3.3097	DNA2	47	2.62503	0.0115936	0.137212
CARMIL2	0.482697	-0.250055	2.59707	0.0125057	0.143175	-3.31086	CARMIL2	75	2.62435	0.011614	0.137307
AKR1C3	-0.944905	-0.724374	-2.60271	0.0123277	0.142219	-3.29813	AKR1C3	21	-2.62316	0.0116492	0.137395
GREB1	1.4882	-0.309707	2.6427	0.0122056	0.141757	-3.17939	GREB1	1	2.65798	0.0116627	0.137395
HVCN1	0.867516	0.0431934	2.60522	0.0122492	0.142094	-3.29246	HVCN1	10	2.6227	0.011663	0.137395
CLIP2	-0.549022	0.320498	-2.59618	0.0125338	0.143193	-3.31286	CLIP2	79	-2.62245	0.0116705	0.137395
RTP4	-0.823805	-0.0619384	-2.72129	0.010416	0.12807	-2.87063	RTP4	1	-2.66913	0.0117172	0.137649
ZNF146	0.23916	0.174704	2.69204	0.00980174	0.124847	-3.09386	ZNF146	6	2.62068	0.0117234	0.137649
IRF2BP2	0.327336	0.11952	2.58608	0.0128591	0.144549	-3.3356	IRF2BP2	80	2.6204	0.011732	0.137649
ARHGAP21	-0.647649	-0.139638	-2.60724	0.0121865	0.141699	-3.28789	ARHGAP21	8	-2.61963	0.0117548	0.137649
FRMD4B	0.731349	0.0705876	2.60488	0.0122599	0.142094	-3.29323	FRMD4B	8	2.61932	0.0117644	0.137649
APOL1	-0.725701	-0.3423	-3.12564	0.00581146	0.0906199	-2.15813	APOL1	1	-2.78752	0.0117779	0.137649
ACO1	-0.338383	0.0200002	-2.582	0.0129924	0.145477	-3.34475	ACO1	107	-2.6185	0.0117889	0.137649
GSKIP	0.305786	-0.0460282	2.62677	0.0115944	0.137776	-3.24361	GSKIP	12	2.61841	0.0117917	0.137649
GOT1	0.312684	-0.138854	2.57688	0.013162	0.146497	-3.35625	GOT1	133	2.61804	0.0118027	0.137649
GNAI2	-0.338756	0.0365172	-2.57684	0.0131632	0.146497	-3.35633	GNAI2	171	-2.61698	0.0118349	0.137843
RASIP1	-1.10824	-0.0140484	-2.61226	0.0123314	0.142219	-3.28515	RASIP1	2	-2.62548	0.0118639	0.137843
CYBA	-0.452652	0.0250536	-2.65284	0.0108452	0.131981	-3.18413	CYBA	2	-2.61595	0.011866	0.137843
BMPR1A	0.854762	-0.706472	2.6094	0.0121197	0.141199	-3.28301	BMPR1A	2	2.61514	0.0118905	0.137843
TTC30A	-0.493043	0.0117635	-2.67179	0.0103286	0.12807	-3.14061	TTC30A	1	-2.61512	0.0118912	0.137843
PPP1R3F	0.419349	0.160378	2.66196	0.0105937	0.129484	-3.16321	PPP1R3F	2	2.61506	0.0118932	0.137843
GTF3C6	-0.205275	-0.129746	-2.70355	0.00951345	0.12271	-3.06718	GTF3C6	7	-2.61447	0.0119111	0.137908
RBMX	0.12424	0.079321	2.58898	0.012765	0.14401	-3.32908	RBMX	37	2.61397	0.0119261	0.137939
CUX1	0.308039	0.161841	2.56903	0.0134253	0.147074	-3.37381	CUX1	185	2.61346	0.0119419	0.137947
SAG	-0.989919	0.16617	-3.54584	0.0035438	0.0657205	-1.69085	SAG	1	-2.88976	0.0119515	0.137947
SCP2	0.327896	-0.154197	2.57556	0.0132058	0.146533	-3.35919	SCP2	104	2.61257	0.0119689	0.138006
BORCS5	0.358619	-0.151913	2.6025	0.0123343	0.142219	-3.2986	BORCS5	18	2.61153	0.0120007	0.138231
PLD1	-1.02682	-0.606214	-2.59204	0.0126662	0.143747	-3.32218	PLD1	8	-2.61009	0.0120448	0.138596
CD109	-0.989698	0.187876	-2.58763	0.0128087	0.144272	-3.33211	CD109	27	-2.60871	0.0120875	0.138915
TTC28	-1.05047	-0.0377531	-2.58874	0.0127726	0.14401	-3.32961	TTC28	14	-2.60839	0.0120974	0.138915
PTPN9	0.263698	0.0574733	2.59663	0.0125195	0.143175	-3.31184	PTPN9	26	2.60774	0.0121172	0.139
CARS2	0.328808	-0.0258831	2.58197	0.0129936	0.145477	-3.34483	CARS2	42	2.60648	0.0121565	0.139139
GSTM4	0.714826	-0.242694	2.59223	0.0126601	0.143747	-3.32175	GSTM4	8	2.60633	0.012161	0.139139
CTPS2	0.785909	0.00399531	2.58625	0.0128536	0.144549	-3.33522	CTPS2	22	2.60615	0.0121666	0.139139
NCBP2AS2	0.367357	-0.0760393	2.63683	0.0112998	0.136035	-3.2207	NCBP2AS2	4	2.60556	0.0121848	0.139205
TOMM70	0.160199	0.0546335	2.50107	0.0159161	0.158278	-3.52428	TOMM70	199	2.60471	0.0122114	0.139208
FAHD2A	-0.433637	0.0942529	-2.62996	0.0115001	0.137559	-3.23635	FAHD2A	3	-2.60454	0.0122165	0.139208
CETN3	0.267157	-0.0476898	2.58046	0.0130432	0.14574	-3.34821	CETN3	39	2.60436	0.0122224	0.139208
THAP12	-0.169363	0.093142	-2.56946	0.0134111	0.147072	-3.37287	THAP12	43	-2.60308	0.012262	0.139377
TGM2	1.44883	-1.3891	2.58987	0.0127363	0.14401	-3.32708	TGM2	1	2.60295	0.0122663	0.139377
RBM15B	0.191643	0.0380741	2.56264	0.0136434	0.148167	-3.38808	RBM15B	52	2.60251	0.01228	0.139377
TBC1D10B	-0.175428	0.107358	-2.55977	0.0137426	0.14898	-3.3945	TBC1D10B	51	-2.60206	0.012294	0.139377
CHRAC1	-0.220562	0.0354075	-2.64313	0.0111189	0.134435	-3.20633	CHRAC1	11	-2.60185	0.0123006	0.139377
PSMB10	-0.314078	0.167375	-2.56994	0.0133945	0.147072	-3.37177	PSMB10	63	-2.60149	0.0123119	0.139377
BRMS1L	-0.375655	0.195016	-2.59233	0.0126568	0.143747	-3.32153	BRMS1L	16	-2.60034	0.012348	0.139404
SRSF9	0.149853	0.0276611	2.49165	0.0162928	0.160576	-3.54491	SRSF9	165	2.60034	0.012348	0.139404
REEP2	0.757477	-0.0691369	2.62357	0.0124467	0.142926	-3.27276	REEP2	2	2.624	0.0123516	0.139404
MTIF2	0.262457	0.106597	2.56863	0.013439	0.147074	-3.37471	MTIF2	48	2.59804	0.0124204	0.140027
CDC42SE2	-0.500687	-0.097336	-2.62269	0.0117157	0.138283	-3.25287	CDC42SE2	2	-2.59768	0.0124318	0.140027
PDLIM7	-0.419985	0.230182	-2.57569	0.0132015	0.146533	-3.3589	PDLIM7	35	-2.59696	0.0124548	0.140145
PROSER1	0.291154	-0.130119	2.60202	0.0123493	0.142245	-3.29968	PROSER1	14	2.59638	0.0124731	0.14021
ZNF692	-0.453167	-0.0644538	-2.66424	0.0105316	0.129006	-3.15797	ZNF692	1	-2.59447	0.0125338	0.14075
CRACD	0.88138	0.044194	2.57381	0.0132643	0.146746	-3.36311	CRACD	19	2.59355	0.0125632	0.140833
STT3A	-0.267346	0.122328	-2.55123	0.0140411	0.150148	-3.41353	STT3A	93	-2.59346	0.0125662	0.140833
USP32	-0.284442	-0.171956	-2.57118	0.0133528	0.146863	-3.36901	USP32	36	-2.59269	0.0125907	0.14084
MAT2A	0.163867	-0.00840963	2.50019	0.0159512	0.158465	-3.52623	MAT2A	154	2.59265	0.0125921	0.14084
HLA-G	-0.706233	-0.190479	-2.57703	0.0131569	0.146497	-3.35591	HLA-G	8	-2.59095	0.0126465	0.141307
KATNAL1	-0.276177	-0.00419556	-2.5742	0.0132514	0.146746	-3.36225	KATNAL1	29	-2.58954	0.0126919	0.141529
LMTK2	-0.337797	0.0360118	-2.57116	0.0133535	0.146863	-3.36906	LMTK2	30	-2.58923	0.0127018	0.141529
CPPED1	-0.964969	-0.11828	-2.56826	0.0134516	0.147074	-3.37554	CPPED1	27	-2.58916	0.0127043	0.141529
BAHCC1	0.511488	0.10277	2.5713	0.0133486	0.146863	-3.36873	BAHCC1	22	2.58867	0.0127201	0.141565
IGSF8	0.306941	-0.167185	2.58953	0.012747	0.14401	-3.32783	IGSF8	14	2.58686	0.0127787	0.141966
PRAF2	0.806123	-0.510018	2.5715	0.0133419	0.146863	-3.36828	PRAF2	7	2.5865	0.0127904	0.141966
MUL1	0.375265	-0.0372793	2.58095	0.0130271	0.145705	-3.34711	MUL1	14	2.58638	0.0127942	0.141966
MLLT11	0.513741	-0.338552	2.56602	0.013528	0.147609	-3.38056	MLLT11	24	2.58416	0.0128665	0.142627
FAIM	0.56016	0.107762	2.56566	0.0135401	0.147609	-3.38135	FAIM	21	2.58335	0.0128928	0.142676
PRKCA	0.720895	-0.729348	2.56262	0.0136442	0.148167	-3.38814	PRKCA	29	2.58324	0.0128964	0.142676
FASTKD2	0.308653	-0.229791	2.55496	0.01391	0.149602	-3.40522	FASTKD2	49	2.58236	0.0129255	0.142784
SYNJ2	-0.550925	-0.366143	-2.55968	0.0137457	0.14898	-3.3947	SYNJ2	42	-2.58217	0.0129317	0.142784
ARV1	-0.329768	-0.0093945	-2.66837	0.0104202	0.12807	-3.14848	ARV1	2	-2.5806	0.0129833	0.143212
RAD9A	-0.318857	0.0441116	-2.58402	0.0129262	0.145011	-3.34021	RAD9A	11	-2.5768	0.0131089	0.144322
PAK1IP1	-0.189676	0.0275775	-2.54459	0.0142772	0.15137	-3.42828	PAK1IP1	44	-2.57643	0.013121	0.144322
SH2D2A	0.77452	-0.254195	2.56617	0.0135228	0.147609	-3.38022	SH2D2A	4	2.57639	0.0131225	0.144322
LILRB4	1.00004	-0.182202	2.56262	0.0136441	0.148167	-3.38813	LILRB4	3	2.57571	0.0131451	0.144391
PARP14	-0.346469	-0.101424	-2.53808	0.014512	0.152991	-3.44272	PARP14	150	-2.57542	0.0131546	0.144391
DCAF1	0.180889	-0.04543	2.50736	0.0156691	0.158202	-3.51048	DCAF1	97	2.57358	0.0132159	0.14486
PIK3C2A	0.397415	0.0197266	2.54626	0.0142174	0.150879	-3.42457	PIK3C2A	59	2.57306	0.0132334	0.14486
ITGA5	0.746398	0.0172953	2.55251	0.0139958	0.149988	-3.41067	ITGA5	28	2.57298	0.0132361	0.14486
RMDN3	-0.422409	0.00731974	-2.55039	0.0140707	0.150273	-3.4154	RMDN3	33	-2.57076	0.0133106	0.14546
ARMCX5	-0.412462	0.0545477	-2.57403	0.013257	0.146746	-3.36263	ARMCX5	7	-2.57058	0.0133169	0.14546
IRX2	1.34856	-0.0469182	2.56632	0.0138353	0.149373	-3.38744	IRX2	1	2.57907	0.0133349	0.145514
XRCC5	0.116762	0.031996	2.3693	0.0219715	0.189663	-3.80723	XRCC5	923	2.569	0.0133701	0.14556
GNPAT	0.298505	-0.0428857	2.53378	0.0146692	0.153636	-3.45225	GNPAT	77	2.56877	0.013378	0.14556
GPRASP2	-0.716426	-0.405903	-2.58139	0.013412	0.147072	-3.35577	GPRASP2	2	-2.58031	0.0133781	0.14556
GNA15	-0.637185	-0.23469	-2.54657	0.0142063	0.150879	-3.42388	GNA15	36	-2.56795	0.0134056	0.145717
PHIP	0.262568	0.0402672	2.51956	0.0151999	0.155876	-3.48365	PHIP	142	2.56753	0.0134199	0.145732
ESYT2	0.338394	0.0392772	2.52795	0.0148847	0.154879	-3.46514	ESYT2	172	2.56671	0.0134476	0.145891
LPCAT1	-0.34459	-0.0457924	-2.54979	0.0140918	0.150273	-3.41672	LPCAT1	27	-2.56597	0.0134731	0.146026
SERPINB1	-1.05924	0.0790392	-2.5429	0.0143376	0.151658	-3.43202	SERPINB1	92	-2.56556	0.0134868	0.146033
TMBIM6	0.410288	-0.0261579	2.59279	0.012642	0.143747	-3.32049	TMBIM6	3	2.56383	0.0135458	0.146375
MON1A	0.212263	-0.0829587	2.67425	0.0102633	0.12807	-3.13495	MON1A	5	2.5635	0.0135574	0.146375
MAPK8	0.179387	-0.310352	2.55866	0.013781	0.149075	-3.39698	MAPK8	28	2.5632	0.0135676	0.146375
SBF2	-0.712572	-0.0463901	-2.55268	0.0139899	0.149988	-3.4103	SBF2	5	-2.56311	0.0135707	0.146375
ITK	0.398641	-1.2829	2.56435	0.0135848	0.147953	-3.38427	ITK	7	2.55937	0.0136992	0.147497
MRPL49	-0.287084	0.0587953	-2.54975	0.0140931	0.150273	-3.4168	MRPL49	23	-2.55932	0.013701	0.147497
CFLAR	-0.482662	-0.336522	-2.58552	0.0128775	0.14461	-3.33686	CFLAR	2	-2.55879	0.0137193	0.147551
NIBAN2	-0.760169	0.200632	-2.53655	0.014568	0.153293	-3.44612	NIBAN2	38	-2.55804	0.0137456	0.147692
STRIP2	-0.46871	-0.305199	-2.61768	0.0118665	0.139303	-3.26424	STRIP2	1	-2.55757	0.0137618	0.147725
GOLGB1	0.161767	0.00148637	2.44535	0.0182634	0.17181	-3.64537	GOLGB1	432	2.5562	0.0138093	0.148093
MRPL39	-0.277942	0.0310536	-2.52473	0.015005	0.155439	-3.47225	MRPL39	52	-2.55423	0.0138779	0.148592
UBE2D1	0.288084	0.0396451	2.61541	0.0119354	0.139779	-3.26939	UBE2D1	4	2.55411	0.0138823	0.148592
ADI1	0.385005	0.0340922	2.52565	0.0149707	0.155439	-3.47023	ADI1	58	2.55232	0.013945	0.149119
DNM1L	0.154025	0.0800621	2.44471	0.0182921	0.17181	-3.64675	DNM1L	223	2.55189	0.0139601	0.149138
C19orf57	-0.506289	0.119025	-2.59676	0.0125155	0.143175	-3.31156	C19orf57	1	-2.54938	0.0140488	0.149943
VRK2	-0.317197	0.00974469	-2.53271	0.0147084	0.153903	-3.4546	VRK2	27	-2.54792	0.0141002	0.150311
LSM11	0.236212	-0.131615	2.62947	0.0115148	0.137582	-3.23748	LSM11	5	2.54763	0.0141106	0.150311
TRAF6	-0.212193	0.207983	-2.52278	0.0150782	0.15559	-3.47654	TRAF6	39	-2.54726	0.014124	0.150311
APOB	-0.518121	-0.512687	-2.52853	0.0148633	0.154799	-3.46386	APOB	25	-2.54689	0.014137	0.150311
MAP2K6	0.543057	-0.18934	2.52629	0.0149467	0.155379	-3.46881	MAP2K6	27	2.54546	0.0141879	0.15071
KIR3DL2	2.44965	-2.82127	2.53175	0.0149868	0.155439	-3.46048	KIR3DL2	1	2.55138	0.0142065	0.150764
CD6	0.494324	-0.844613	2.53982	0.014449	0.152614	-3.43887	CD6	7	2.54431	0.0142291	0.150818
BIRC2	0.207266	-0.0821038	2.55549	0.0138915	0.149602	-3.40405	BIRC2	19	2.54404	0.0142386	0.150818
BSCL2	0.47423	0.042581	2.55869	0.0137799	0.149075	-3.3969	BSCL2	3	2.5434	0.0142616	0.150846
SLC25A11	-0.292447	0.333112	-2.52149	0.0151271	0.155664	-3.4794	SLC25A11	37	-2.54322	0.0142682	0.150846
PTPA	0.237607	-0.0332883	2.50393	0.0158035	0.158243	-3.51802	PTPA	67	2.54265	0.0142887	0.150921
REXO4	-0.399011	-0.228679	-2.52198	0.0151086	0.155664	-3.47833	REXO4	33	-2.54203	0.014311	0.151014
MINK1	-0.311768	0.103021	-2.5427	0.0143449	0.151658	-3.43247	MINK1	14	-2.54162	0.0143254	0.151024
TAZ	-0.44022	0.22353	-2.54821	0.0141481	0.150715	-3.42025	TAZ	5	-2.54118	0.0143415	0.151051
GCH1	0.793424	-0.825848	2.54632	0.0142152	0.150879	-3.42443	GCH1	1	2.5405	0.0143659	0.151151
CARMIL1	-0.815347	-0.596538	-2.52391	0.0150358	0.155439	-3.47406	CARMIL1	9	-2.54017	0.014378	0.151151
RAB33A	0.648858	-0.6586	2.52397	0.0150335	0.155439	-3.47392	RAB33A	12	2.5391	0.0144164	0.151257
ZNF91	0.380439	-0.0776775	2.59479	0.0125782	0.143406	-3.31599	ZNF91	2	2.5391	0.0144165	0.151257
HOXC4	1.78689	-0.650976	2.6169	0.0157083	0.158202	-3.164	HOXC4	2	2.64681	0.0144426	0.151257
KRAS	0.3655	-0.0942682	2.53469	0.0146359	0.153574	-3.45024	KRAS	13	2.53827	0.0144466	0.151257
KIF13B	0.257207	-0.0942337	2.49457	0.0161752	0.160122	-3.53852	KIF13B	102	2.53802	0.0144556	0.151257
UBP1	0.250205	-0.0281079	2.52179	0.0151155	0.155664	-3.47873	UBP1	29	2.53578	0.0145371	0.151968
CTTNBP2NL	-0.354902	0.180829	-2.51805	0.0152572	0.156285	-3.48697	CTTNBP2NL	28	-2.53506	0.0145637	0.152086
KCTD5	-0.337922	-0.0920901	-2.53583	0.0145942	0.153424	-3.44771	KCTD5	12	-2.53462	0.0145794	0.152086
DIS3L	-0.250953	-0.0105426	-2.5025	0.0158596	0.158243	-3.52115	DIS3L	54	-2.53436	0.0145891	0.152086
PLEKHG3	-1.05713	-0.262496	-2.51947	0.0152033	0.155876	-3.48384	PLEKHG3	3	-2.53345	0.0146223	0.152201
ZBTB2	0.162585	-0.0289833	2.60441	0.0122745	0.142115	-3.29429	ZBTB2	13	2.53332	0.0146274	0.152201
AC011005.1	-0.312696	-0.121481	-2.54343	0.0143189	0.151658	-3.43087	AC011005.1	9	-2.53089	0.0147165	0.152922
PLCXD1	-0.500742	-0.0274248	-2.57825	0.0131165	0.146413	-3.35318	PLCXD1	1	-2.53069	0.014724	0.152922
PDPN	2.13063	-0.912797	2.55505	0.015727	0.158202	-3.31197	PDPN	1	2.57854	0.0147429	0.152976
CWC15	0.130367	0.0277642	2.51208	0.015486	0.157907	-3.50011	CWC15	35	2.52952	0.0147674	0.152995
SNX7	1.20301	-1.12452	2.51019	0.0155593	0.158202	-3.50428	SNX7	11	2.52939	0.0147721	0.152995
MGAT1	-0.263242	-0.0427331	-2.53382	0.0146679	0.153636	-3.45216	MGAT1	15	-2.52674	0.0148706	0.153782
HEATR6	0.315623	-0.334152	2.50535	0.0157477	0.158243	-3.5149	HEATR6	36	2.52633	0.0148856	0.153782
GTF3A	-0.403258	-0.0565277	-2.51256	0.0154677	0.157907	-3.49907	GTF3A	20	-2.52601	0.0148978	0.153782
APOBR	0.772872	-0.78856	2.50496	0.0157631	0.158243	-3.51576	APOBR	32	2.52561	0.0149127	0.153782
DDHD2	0.252622	0.101468	2.50724	0.0156741	0.158202	-3.51076	DDHD2	33	2.5255	0.0149167	0.153782
WDSUB1	-0.396438	0.272126	-2.5109	0.0155319	0.158202	-3.50273	WDSUB1	21	-2.52477	0.0149439	0.153817
MARS1	0.161032	0.00119899	2.43023	0.0189523	0.175111	-3.67787	MARS1	192	2.52453	0.014953	0.153817
SLX4	0.208969	-0.0845362	2.53164	0.0147479	0.154171	-3.45697	SLX4	20	2.52408	0.01497	0.153817
INSR	-0.444933	0.373444	-2.49788	0.0160428	0.159092	-3.53128	INSR	68	-2.52394	0.014975	0.153817
PRKAR2B	-0.87401	0.0742895	-2.50349	0.0158208	0.158243	-3.51899	PRKAR2B	17	-2.52242	0.0150323	0.154264
WNK1	0.222869	-0.228242	2.47164	0.0171197	0.16552	-3.58851	WNK1	99	2.52105	0.0150837	0.15465
RAB9A	-0.28395	0.0283629	-2.50109	0.0159153	0.158278	-3.52424	RAB9A	33	-2.51991	0.0151269	0.154951
NDUFB5	-0.276251	0.0869691	-2.50825	0.0156344	0.158202	-3.50853	NDUFB5	25	-2.51945	0.0151441	0.154985
FAM177A1	0.301706	-0.2077	2.53039	0.0147943	0.15433	-3.45975	FAM177A1	10	2.51877	0.0151702	0.155023
MDM4	-0.639125	0.0716524	-2.50625	0.0157127	0.158202	-3.51294	MDM4	8	-2.51863	0.0151755	0.155023
PSEN2	1.16836	-0.0569007	2.56144	0.015672	0.158202	-3.37284	PSEN2	1	2.56941	0.0152369	0.155425
CYTIP	-1.0336	-0.514855	-2.5032	0.0158322	0.158243	-3.51962	CYTIP	3	-2.51686	0.0152427	0.155425
RRAGA	-0.316452	0.11075	-2.53544	0.0146084	0.15343	-3.44857	RRAGA	7	-2.5164	0.0152603	0.155463
MRPL42	-0.218087	0.0762725	-2.54687	0.0141955	0.150879	-3.42321	MRPL42	12	-2.51452	0.0153321	0.155932
HDAC3	0.241004	0.133274	2.50102	0.0159183	0.158278	-3.5244	HDAC3	29	2.51446	0.0153341	0.155932
WDR77	-0.11673	0.172814	-2.43039	0.0189451	0.175111	-3.67754	WDR77	63	-2.51372	0.0153625	0.156078
SERAC1	0.456224	-0.0193261	2.53012	0.0148044	0.15433	-3.46035	SERAC1	3	2.51298	0.0153909	0.156226
SLC25A23	0.593524	-0.285144	2.51394	0.0154145	0.157608	-3.49603	SLC25A23	3	2.5126	0.0154055	0.156232
ADGRA3	0.558631	-0.0651411	2.50768	0.0156567	0.158202	-3.50978	ADGRA3	5	2.51181	0.015436	0.156388
BLZF1	-0.179997	-0.0989891	-2.70769	0.00941159	0.1221	-3.05756	BLZF1	4	-2.51148	0.0154488	0.156388
NFIL3	0.718466	0.10849	2.49513	0.0161527	0.16004	-3.5373	NFIL3	10	2.51045	0.0154886	0.156649
KLHL14	-0.878221	0.1043	-2.50218	0.0158724	0.158243	-3.52186	KLHL14	2	-2.50968	0.0155185	0.15681
ZNF449	-0.527932	-0.414716	-2.56159	0.0139994	0.149988	-3.3979	ZNF449	1	-2.51729	0.0155515	0.157002
AC091230.1	-0.366642	0.156025	-2.49337	0.0162233	0.160173	-3.54114	AC091230.1	22	-2.50681	0.0156299	0.157651
SIDT1	0.869103	-0.162087	2.51493	0.0157149	0.158202	-3.50028	SIDT1	1	2.51373	0.015689	0.158105
FSCN1	-0.943349	0.0915516	-2.48023	0.0167603	0.163801	-3.56983	FSCN1	98	-2.50265	0.0157928	0.15874
TRIM3	-0.304434	0.184559	-2.5305	0.0147901	0.15433	-3.4595	TRIM3	6	-2.50244	0.0158009	0.15874
STAP1	-1.13411	0.113341	-2.48285	0.016652	0.16311	-3.56412	STAP1	15	-2.50225	0.0158084	0.15874
C1orf131	-0.240621	0.0436424	-2.49393	0.016201	0.160161	-3.53993	C1orf131	25	-2.50211	0.0158139	0.15874
TPRA1	-0.322316	0.0701157	-2.55806	0.0138017	0.149154	-3.3983	TPRA1	3	-2.50188	0.0158229	0.15874
SIK2	-0.234176	0.0465003	-2.53939	0.0144647	0.152636	-3.43983	SIK2	9	-2.50146	0.0158394	0.158763
SPTLC1	-0.205378	0.0432361	-2.45988	0.0176229	0.16835	-3.614	SPTLC1	60	-2.4995	0.0159169	0.159144
NUDT3	0.233543	0.139089	2.52405	0.0150306	0.155439	-3.47376	NUDT3	12	2.49943	0.01592	0.159144
KAZALD1	-0.968837	0.43429	-2.57371	0.0156233	0.158202	-3.28846	KAZALD1	1	-2.56111	0.0159201	0.159144
NSUN6	0.342145	-0.178581	2.47894	0.0168137	0.163978	-3.57263	NSUN6	33	2.49829	0.015965	0.15945
NEURL1B	0.864684	-0.0132824	2.607	0.0151532	0.15579	-3.23977	NEURL1B	1	2.5761	0.0160504	0.160161
PLPP1	0.534218	-0.515011	2.5104	0.0155512	0.158202	-3.50382	PLPP1	2	2.49506	0.0160938	0.160451
PYGL	-1.04932	0.0961623	-2.47234	0.01709	0.16552	-3.58698	PYGL	48	-2.49355	0.0161542	0.160909
RIC8B	0.291522	-0.177238	2.50282	0.0158471	0.158243	-3.52045	RIC8B	11	2.49246	0.0161983	0.161064
MED18	0.163948	0.0546813	2.4989	0.0160024	0.158832	-3.52905	MED18	25	2.49245	0.0161985	0.161064
SLC12A9	-0.406599	0.222204	-2.47326	0.0170511	0.165428	-3.58498	SLC12A9	24	-2.48916	0.0163314	0.162242
NCOA1	0.316177	-0.033668	2.47525	0.0169678	0.164906	-3.58067	NCOA1	25	2.48879	0.0163465	0.162247
MLLT10	0.2884	-0.0464674	2.47709	0.0168907	0.164442	-3.57666	MLLT10	24	2.48817	0.0163715	0.162325
PXDN	-0.62108	0.219255	-2.46469	0.0174154	0.167473	-3.60358	PXDN	67	-2.48785	0.0163847	0.162325
ATP5PF	0.19479	0.00269306	2.44249	0.0183922	0.172462	-3.65154	ATP5PF	67	2.48753	0.0163978	0.162325
PDCD6IP	0.257743	0.0297974	2.43308	0.0188209	0.174668	-3.67177	PDCD6IP	388	2.48684	0.0164257	0.162445
ATG4C	0.294081	0.107936	2.4872	0.0164734	0.161645	-3.55462	ATG4C	15	2.48652	0.0164389	0.162445
XRCC6	0.119178	0.0462137	2.30623	0.0255452	0.206462	-3.93844	XRCC6	988	2.48382	0.0165492	0.163286
C2orf49	0.18929	-0.0976756	2.49058	0.0163361	0.16072	-3.54725	C2orf49	22	2.48373	0.0165532	0.163286
MINPP1	0.778617	-0.22884	2.46536	0.0173867	0.167379	-3.60213	MINPP1	14	2.48276	0.0165928	0.163426
UBXN7	0.15599	0.0902555	2.41034	0.0198941	0.179335	-3.72038	UBXN7	92	2.48267	0.0165966	0.163426
ST3GAL1	-0.507275	-0.131791	-2.4841	0.0166005	0.162749	-3.56139	ST3GAL1	4	-2.48117	0.0166586	0.163893
CHCHD2	0.462423	0.406784	2.4607	0.0175876	0.16835	-3.61223	CHCHD2	31	2.48002	0.0167059	0.164213
DAB2	-1.05509	0.0324607	-2.46048	0.0175972	0.16835	-3.61271	DAB2	5	-2.47663	0.0168467	0.165452
GBP1	-0.558307	-0.321713	-2.45205	0.0179655	0.170228	-3.63092	GBP1	56	-2.47487	0.0169204	0.165629
SETD2	0.140275	0.0663149	2.37103	0.0218804	0.189387	-3.80361	SETD2	152	2.47446	0.0169378	0.165629
NFYB	0.138117	0.03156	2.55383	0.0139495	0.149884	-3.40774	NFYB	15	2.47425	0.0169464	0.165629
STIM2	0.459046	0.36072	2.45175	0.0179787	0.170228	-3.63156	STIM2	45	2.47412	0.016952	0.165629
BLMH	-0.211213	0.118935	-2.4164	0.0196027	0.177931	-3.70745	BLMH	147	-2.47406	0.0169543	0.165629
FBXO43	-1.31303	0.315744	-2.52564	0.0172468	0.166605	-3.29518	FBXO43	1	-2.52872	0.0169622	0.165629
MAML2	-0.829403	-0.011726	-2.47565	0.016951	0.164886	-3.5798	MAML2	1	-2.47351	0.0169774	0.165629
NCOR1	0.346089	0.078493	2.43736	0.0186244	0.173477	-3.66256	NCOR1	190	2.47338	0.0169831	0.165629
AMPD3	-0.670026	-0.0412711	-2.45431	0.0178661	0.169861	-3.62604	AMPD3	23	-2.47298	0.0169995	0.165645
SPATA24	0.357108	-0.230338	2.60477	0.0125658	0.143406	-3.30191	SPATA24	1	2.48012	0.0170419	0.165914
BAZ2B	-0.637896	0.120104	-2.45247	0.0179471	0.170228	-3.63002	BAZ2B	22	-2.47071	0.0170955	0.16619
ANKRD28	0.241294	-0.0534212	2.44375	0.0183351	0.172071	-3.64881	ANKRD28	45	2.4706	0.0170999	0.16619
CDR2	0.367659	-0.288795	2.45522	0.0178264	0.169715	-3.62409	CDR2	22	2.46871	0.0171802	0.166731
UGDH	0.361485	0.0918217	2.43944	0.01853	0.173029	-3.65809	UGDH	80	2.46859	0.0171854	0.166731
FERMT2	-0.949364	-0.235838	-2.44749	0.0181681	0.17122	-3.64077	FERMT2	32	-2.46781	0.0172185	0.166787
MT-ND2	-0.415367	0.282028	-2.49084	0.0163254	0.16072	-3.54667	MT-ND2	3	-2.46775	0.017221	0.166787
TMUB1	-0.25397	-0.0547175	-2.5142	0.0154045	0.157608	-3.49545	TMUB1	6	-2.46664	0.0172682	0.167057
SLC4A2	-0.497388	-0.0549145	-2.44674	0.0182014	0.171391	-3.64238	SLC4A2	32	-2.46639	0.0172787	0.167057
CCDC130	-0.16232	0.0716561	-2.47186	0.0171103	0.16552	-3.58803	CCDC130	25	-2.46553	0.0173155	0.167269
PIGBOS1	-0.31898	0.281998	-2.50384	0.015807	0.158243	-3.51822	PIGBOS1	4	-2.46456	0.017357	0.167525
DLG4	-0.351926	0.121728	-2.4924	0.0162624	0.160418	-3.54326	DLG4	4	-2.46415	0.0173749	0.167553
SH3TC1	-0.714765	-0.450242	-2.45123	0.018002	0.170228	-3.6327	SH3TC1	6	-2.46349	0.0174029	0.167621
NANS	-0.251737	0.109953	-2.42048	0.019409	0.1771	-3.69875	NANS	108	-2.46309	0.0174201	0.167621
GET3	-0.160627	0.0740343	-2.39414	0.0206918	0.18299	-3.7548	GET3	93	-2.46271	0.0174367	0.167621
PLD2	-0.432867	0.145426	-2.48193	0.0166899	0.163339	-3.56612	PLD2	3	-2.46259	0.0174418	0.167621
P4HA2	-0.76254	0.449167	-2.44491	0.0182834	0.17181	-3.64633	P4HA2	9	-2.4603	0.0175403	0.168423
ARR3	-0.87896	0.0306446	-2.4681	0.0180615	0.170503	-3.60614	ARR3	2	-2.47685	0.017592	0.168713
RBM22	-0.14569	0.115015	-2.38584	0.0211119	0.185533	-3.77237	RBM22	83	-2.45891	0.0176007	0.168713
SENP5	0.156779	-0.0452682	2.49376	0.0162078	0.160161	-3.5403	SENP5	18	2.4572	0.0176751	0.169141
TBC1D2	-0.487161	-0.0200726	-2.46781	0.0172819	0.166657	-3.59681	TBC1D2	3	-2.45719	0.0176755	0.169141
ALDH8A1	-0.410687	0.151291	-2.54338	0.01456	0.153293	-3.4349	ALDH8A1	1	-2.46151	0.0177427	0.169639
FNTB	-0.328566	-0.0603021	-2.50463	0.0157762	0.158243	-3.51649	FNTB	3	-2.45527	0.0177595	0.169655
ELAC2	0.178814	0.00230389	2.38834	0.0209845	0.184703	-3.76708	ELAC2	117	2.45355	0.0178348	0.170025
MRPL27	-0.219608	-0.00182752	-2.47763	0.0168684	0.164368	-3.57549	MRPL27	13	-2.45337	0.0178424	0.170025
EIF4EBP2	0.176763	-0.103089	2.46019	0.0176095	0.16835	-3.61333	EIF4EBP2	23	2.45304	0.017857	0.170025
ANGEL1	0.3072	0.00263624	2.4641	0.0174409	0.167473	-3.60486	ANGEL1	9	2.45285	0.0178657	0.170025
PUS3	0.254112	-0.288645	2.45138	0.0179951	0.170228	-3.63237	PUS3	19	2.45251	0.0178805	0.170025
PATZ1	-0.155667	0.152717	-2.44867	0.0181155	0.170869	-3.63823	PATZ1	29	-2.45231	0.0178894	0.170025
GNG2	-0.459614	-0.0453672	-2.43329	0.0188112	0.174668	-3.67131	GNG2	26	-2.45082	0.0179549	0.170503
KANSL1	0.167773	-0.0686366	2.41325	0.0197538	0.178358	-3.71418	KANSL1	48	2.4495	0.0180135	0.170915
FRMD8	-0.213951	0.156844	-2.46409	0.0174414	0.167473	-3.60489	FRMD8	16	-2.44882	0.0180434	0.171053
ANKLE1	-0.86068	-0.314589	-2.43747	0.0186199	0.173477	-3.66234	ANKLE1	3	-2.44814	0.0180737	0.171196
XYLB	-0.369274	-0.0278153	-2.45016	0.0180494	0.170503	-3.63501	XYLB	8	-2.44668	0.0181389	0.171352
SYS1	-0.353392	-0.195547	-2.55541	0.0138943	0.149602	-3.40422	SYS1	1	-2.44655	0.0181444	0.171352
FASTKD1	0.23902	0.019872	2.42464	0.0192128	0.176687	-3.68984	FASTKD1	38	2.44654	0.0181451	0.171352
MCRIP2	0.481254	-0.298088	2.46814	0.0172678	0.166657	-3.59609	MCRIP2	2	2.44639	0.0181515	0.171352
GAS8	-0.96491	-0.156778	-2.45061	0.0184966	0.173006	-3.64015	GAS8	1	-2.45482	0.0182274	0.171894
C7orf25	0.281981	-0.0908632	2.43955	0.0185252	0.173029	-3.65787	C7orf25	19	2.44443	0.0182395	0.171894
ARSK	0.342212	-0.0442875	2.5073	0.0156715	0.158202	-3.51062	ARSK	2	2.44254	0.0183241	0.172253
MRPL4	-0.219937	-0.0228921	-2.43772	0.0186084	0.173477	-3.6618	MRPL4	24	-2.44231	0.0183344	0.172253
NR2C1	0.160373	0.0882359	2.46239	0.0175147	0.167889	-3.60858	NR2C1	21	2.44229	0.0183354	0.172253
CACFD1	0.63754	-0.126532	2.51891	0.016781	0.163801	-3.45287	CACFD1	1	2.47833	0.0183392	0.172253
ATG4B	0.187765	0.0534864	2.40938	0.0199405	0.179609	-3.72242	ATG4B	47	2.44144	0.0183737	0.172385
ECI1	0.262557	0.311296	2.41361	0.0197366	0.178358	-3.71342	ECI1	50	2.44121	0.0183841	0.172385
ZNFX1	-0.185416	0.0391811	-2.39582	0.0206081	0.182973	-3.75125	ZNFX1	65	-2.44042	0.0184198	0.172445
TNFAIP8L2	-0.430278	0.27172	-2.45931	0.0176479	0.168445	-3.61524	TNFAIP8L2	3	-2.44039	0.0184213	0.172445
ADAL	0.506103	0.0148265	2.42705	0.0190999	0.175857	-3.68468	ADAL	14	2.43998	0.0184397	0.172474
CEBPA	-1.03263	0.547888	-2.43385	0.0193714	0.1771	-3.61476	CEBPA	6	-2.45189	0.0184608	0.172526
TGFBR2	0.553782	0.266262	2.42079	0.019394	0.1771	-3.69807	TGFBR2	21	2.43781	0.018538	0.173104
TWSG1	0.37441	-0.180122	2.45814	0.0176988	0.168643	-3.61777	TWSG1	4	2.43692	0.0185787	0.173308
FKBP10	1.22504	-0.0848671	2.46912	0.0192374	0.176687	-3.5613	FKBP10	1	2.48039	0.0185909	0.173308
GSK3A	-0.190125	0.0612129	-2.47973	0.0167806	0.163801	-3.5709	GSK3A	12	-2.43579	0.0186304	0.173533
HAUS2	-0.261303	-0.0412309	-2.4288	0.0190189	0.175544	-3.68095	HAUS2	21	-2.43423	0.0187016	0.173922
VPS4A	-0.130213	0.017943	-2.51215	0.0154836	0.157907	-3.49998	VPS4A	16	-2.43419	0.0187033	0.173922
MRPL15	-0.229392	0.00750817	-2.4035	0.0202275	0.180884	-3.73494	MRPL15	50	-2.43318	0.0187497	0.174036
PSMB6	0.319418	-0.130483	2.40674	0.0200691	0.180188	-3.72805	PSMB6	53	2.43264	0.0187745	0.174036
UQCC3	-0.353458	0.049153	-2.44115	0.0184525	0.172882	-3.65441	UQCC3	7	-2.43262	0.0187754	0.174036
HMGCS1	0.572149	-0.526505	2.40735	0.0200392	0.180152	-3.72675	HMGCS1	151	2.43257	0.0187777	0.174036
IL3RA	-0.972118	-0.306946	-2.42713	0.0190962	0.175857	-3.68451	IL3RA	1	-2.43173	0.0188166	0.174252
DDR1	-0.67533	0.0957591	-2.4868	0.0173855	0.167379	-3.43269	DDR1	1	-2.45012	0.0188842	0.174733
CBR3	-0.861368	0.0124786	-2.40715	0.0200491	0.180152	-3.72718	CBR3	17	-2.42544	0.0191084	0.176414
SNX15	-0.240049	-0.0108194	-2.43014	0.0189563	0.175111	-3.67806	SNX15	17	-2.4253	0.0191151	0.176414
TTN	0.526283	-0.0503567	2.46157	0.0188896	0.175073	-3.56615	TTN	4	2.45366	0.0191271	0.176414
SEC14L1	-0.389344	-0.386384	-2.40779	0.0200176	0.180152	-3.7258	SEC14L1	28	-2.42501	0.0191288	0.176414
RFLNB	-0.851199	-0.299842	-2.41203	0.0198122	0.178741	-3.71677	RFLNB	4	-2.42449	0.0191529	0.17649
RESF1	0.174957	-0.0962913	2.41685	0.0195814	0.177931	-3.7065	RESF1	28	2.42212	0.0192642	0.17737
WDR92	0.144443	0.171698	2.41974	0.0194439	0.1771	-3.70033	WDR92	29	2.42112	0.0193115	0.177532
PEX26	0.225762	0.00577368	2.47234	0.0170902	0.16552	-3.58699	PEX26	7	2.42108	0.0193135	0.177532
NCOA3	-0.320516	0.0549671	-2.39702	0.0205483	0.182877	-3.74871	NCOA3	45	-2.42053	0.0193392	0.177622
MEF2A	-0.293493	0.305663	-2.44072	0.018472	0.17292	-3.65534	MEF2A	7	-2.41946	0.0193898	0.177941
GPS2	0.33959	0.174423	2.41333	0.0197497	0.178358	-3.714	GPS2	15	2.41877	0.0194224	0.178094
USP7	0.110346	0.00141385	2.24451	0.029536	0.224745	-4.06412	USP7	396	2.41824	0.0194476	0.178127
PIGX	0.339153	0.13378	2.42269	0.0193045	0.176901	-3.69402	PIGX	9	2.41803	0.0194577	0.178127
HLX	-0.712519	0.299524	-2.44112	0.0188229	0.174668	-3.59536	HLX	1	-2.42518	0.0194825	0.178208
FAM3C	0.353552	0.141465	2.39585	0.0206065	0.182973	-3.75118	FAM3C	38	2.41665	0.0195231	0.178306
DVL3	-0.291174	0.0810387	-2.42261	0.0193081	0.176901	-3.69418	DVL3	12	-2.41661	0.0195251	0.178306
DDX46	0.104521	-0.000153983	2.23121	0.0304648	0.226519	-4.09083	DDX46	332	2.41556	0.0195752	0.178618
SCNM1	0.300379	-0.180697	2.45839	0.017688	0.168643	-3.61724	SCNM1	4	2.41486	0.0196087	0.178777
STARD5	-0.674974	-0.576853	-2.41425	0.0197057	0.178356	-3.71204	STARD5	2	-2.41406	0.0196473	0.178883
RAG1	-1.16308	-0.238479	-2.39664	0.0205669	0.182897	-3.7495	RAG1	6	-2.41383	0.0196579	0.178883
NDUFC2	-0.303646	0.0884894	-2.40312	0.0202463	0.180908	-3.73575	NDUFC2	22	-2.41351	0.0196733	0.178883
CNOT6L	-0.246661	0.0603621	-2.39487	0.0206554	0.18299	-3.75325	CNOT6L	34	-2.41329	0.0196841	0.178883
CDK5	-0.210007	0.0155586	-2.38359	0.021227	0.18596	-3.77712	CDK5	43	-2.40985	0.0198496	0.18024
DNAJC5	-0.324705	0.181707	-2.40181	0.0203105	0.181048	-3.73852	DNAJC5	17	-2.40857	0.0199117	0.180658
SMC6	-0.200404	0.1828	-2.35102	0.022958	0.194431	-3.84555	SMC6	129	-2.40671	0.020002	0.181206
PRPF38B	0.129463	0.114223	2.37928	0.0214492	0.187029	-3.78622	PRPF38B	39	2.40666	0.0200045	0.181206
TAF1B	-0.302701	-0.00376065	-2.40564	0.0201225	0.180522	-3.73038	TAF1B	14	-2.40568	0.0200522	0.181417
MRPL52	-0.312432	0.00753601	-2.4336	0.0187966	0.174668	-3.67063	MRPL52	5	-2.40552	0.0200602	0.181417
MAST4	-0.409304	-0.14297	-2.47388	0.0170253	0.165321	-3.58364	MAST4	1	-2.40449	0.0201107	0.181494
TSTA3	-0.334093	0.170209	-2.3829	0.0212627	0.185982	-3.77859	TSTA3	40	-2.40439	0.0201154	0.181494
R3HDM1	0.248947	-0.0697041	2.38299	0.0212576	0.185982	-3.77838	R3HDM1	38	2.40435	0.0201174	0.181494
AL159141.1	0.746657	-0.920257	2.38857	0.0209732	0.184703	-3.76661	AL159141.1	8	2.40312	0.0201775	0.181821
ELK4	-0.30638	0.0256459	-2.43287	0.0188303	0.174668	-3.6722	ELK4	5	-2.40295	0.0201861	0.181821
TXNIP	-0.568602	0.269849	-2.38849	0.0209772	0.184703	-3.76678	TXNIP	13	-2.40239	0.0202134	0.18192
NUDT6	0.483471	0.20296	2.39415	0.0206913	0.18299	-3.75477	NUDT6	8	2.40109	0.0202776	0.182281
IKZF3	-1.06314	-0.363553	-2.38169	0.021325	0.186236	-3.78115	IKZF3	22	-2.40092	0.020286	0.182281
PIGO	0.242104	-0.0878204	2.42097	0.0193857	0.1771	-3.6977	PIGO	11	2.40038	0.0203125	0.18234
PLEKHJ1	-0.367833	0.11059	-2.43083	0.0189248	0.175111	-3.67659	PLEKHJ1	3	-2.39936	0.0203629	0.18234
RCSD1	-0.520904	0.451227	-2.37273	0.0217906	0.188962	-3.80002	RCSD1	216	-2.39922	0.02037	0.18234
SPG7	0.238956	0.275351	2.37829	0.0215007	0.18725	-3.78832	SPG7	37	2.39895	0.0203832	0.18234
MSL2	0.133726	-0.00828212	2.45238	0.0179511	0.170228	-3.63022	MSL2	18	2.39864	0.0203989	0.18234
ZNF486	0.651064	-0.0556345	2.42217	0.0197058	0.178356	-3.69972	ZNF486	1	2.40609	0.020402	0.18234
CLSTN1	-0.366346	-0.219984	-2.40388	0.0202088	0.180862	-3.73413	CLSTN1	7	-2.39822	0.0204193	0.18234
MAPK15	-0.305675	0.280475	-2.42805	0.0190536	0.17572	-3.68255	MAPK15	5	-2.39815	0.0204228	0.18234
POLDIP3	0.161619	0.0457071	2.347	0.0231801	0.19542	-3.85394	POLDIP3	66	2.39781	0.0204396	0.182344
KPNA4	0.148109	-0.0104604	2.33756	0.0237097	0.197849	-3.87361	KPNA4	69	2.39624	0.0205179	0.182897
NUDT16	0.662408	0.10143	2.37782	0.0215247	0.18725	-3.78929	NUDT16	20	2.39539	0.0205602	0.183128
NOMO1	-0.684595	-0.192264	-2.38604	0.0211018	0.185533	-3.77195	NOMO1	4	-2.39442	0.0206086	0.183413
ARHGEF10	-1.16358	-0.0810817	-2.38451	0.0211799	0.185842	-3.77518	ARHGEF10	1	-2.39406	0.0206269	0.183431
RAB39B	0.551452	-0.413211	2.38169	0.0213245	0.186236	-3.78113	RAB39B	10	2.39338	0.0206607	0.183585
RHOH	-0.634536	-0.630376	-2.39538	0.0206302	0.18299	-3.75219	RHOH	2	-2.3929	0.020685	0.183655
SIRT5	0.209859	0.165303	2.42068	0.0193995	0.1771	-3.69832	SIRT5	12	2.39113	0.0207738	0.184298
UBXN1	0.145422	-0.0147799	2.33044	0.0241161	0.2003	-3.8884	UBXN1	69	2.39018	0.020822	0.184536
GBE1	0.348711	0.346984	2.35658	0.0226541	0.193319	-3.83393	GBE1	175	2.38981	0.0208408	0.184536
MORC3	-0.259263	0.0074195	-2.35034	0.0229957	0.194456	-3.84697	MORC3	111	-2.38962	0.0208501	0.184536
KBTBD3	0.339923	-0.0576545	2.62525	0.0127389	0.14401	-3.21746	KBTBD3	1	2.41681	0.020867	0.18454
UBQLN2	0.174049	-0.061763	2.40264	0.02027	0.180932	-3.73677	UBQLN2	20	2.38746	0.0209594	0.185211
AACS	0.565871	-0.636925	2.36567	0.0221647	0.190742	-3.81487	AACS	43	2.38638	0.0210144	0.18555
ALKBH6	-0.259319	-0.109741	-2.41622	0.0196112	0.177931	-3.70784	ALKBH6	7	-2.38495	0.0210875	0.185956
TMBIM1	-0.673697	0.27972	-2.41628	0.0202061	0.180862	-3.65167	TMBIM1	1	-2.39582	0.0211272	0.185956
LRMP	0.662858	0.493051	2.36074	0.0224289	0.191837	-3.82522	LRMP	147	2.38404	0.021134	0.185956
NKD2	-0.618405	-0.398799	-2.37784	0.0215239	0.18725	-3.78926	NKD2	4	-2.38369	0.0211517	0.185956
PLSCR1	-0.583318	-0.214064	-2.37244	0.0218059	0.188962	-3.80063	PLSCR1	8	-2.38354	0.0211594	0.185956
ST13	0.19303	-0.0252536	2.31464	0.0250406	0.205377	-3.92111	ST13	304	2.38353	0.0211601	0.185956
TNFRSF10D	-1.51976	0.941891	-3.94953	0.0104168	0.12807	-2.39508	TNFRSF10D	2	-3.11421	0.0212009	0.186169
SPATS2L	-1.23493	-0.134285	-2.36257	0.02233	0.191352	-3.82136	SPATS2L	28	-2.38215	0.0212311	0.186288
NDUFB6	-0.234182	-0.0326119	-2.35868	0.02254	0.192639	-3.82952	NDUFB6	40	-2.3814	0.0212694	0.186327
MAPK13	0.706499	0.383108	2.37047	0.0219099	0.189387	-3.80478	MAPK13	5	2.3814	0.0212694	0.186327
STOM	-0.805185	0.500882	-2.36211	0.0223551	0.191352	-3.82234	STOM	26	-2.38109	0.0212855	0.186327
LIPA	-0.545125	-0.0520077	-2.36787	0.0220476	0.190173	-3.81025	LIPA	12	-2.38066	0.0213076	0.186375
RABEP2	-0.238539	0.204843	-2.34357	0.0233716	0.196153	-3.8611	RABEP2	77	-2.38028	0.0213273	0.186376
UBL3	-0.339386	0.181133	-2.41948	0.0194563	0.1771	-3.70089	UBL3	3	-2.38001	0.021341	0.186376
PPM1H	0.561731	-0.294513	2.37352	0.0217491	0.188762	-3.79835	PPM1H	5	2.37924	0.0213807	0.186577
ATP5ME	0.163895	0.00367952	2.35604	0.0226831	0.19342	-3.83505	ATP5ME	38	2.37881	0.0214032	0.186628
HAX1	0.166967	-0.0840541	2.34732	0.0231625	0.19542	-3.85327	HAX1	43	2.37648	0.0215241	0.187524
PRPH	1.22031	-0.999278	2.36533	0.0221828	0.190752	-3.81559	PRPH	1	2.37589	0.021555	0.187524
HLA-A	-0.65073	-0.257615	-2.35168	0.0229218	0.194418	-3.84417	HLA-A	144	-2.37497	0.0216029	0.187524
PI4K2A	0.592146	-0.233788	2.36334	0.022289	0.191224	-3.81975	PI4K2A	8	2.37472	0.0216157	0.187524
ZBTB8A	0.45359	-0.0110836	2.42421	0.0192332	0.176687	-3.69077	ZBTB8A	1	2.37467	0.0216187	0.187524
ZNF18	0.265551	-0.00748072	2.57628	0.0131817	0.146533	-3.35758	ZNF18	1	2.37466	0.0216189	0.187524
TIFAB	-1.75121	0.66988	-2.49147	0.0232802	0.19568	-3.44925	TIFAB	1	-2.51631	0.0216232	0.187524
PCMT1	0.171832	-0.0257275	2.30792	0.025443	0.206462	-3.93496	PCMT1	122	2.3725	0.0217319	0.18832
IFFO2	-0.877256	-0.336765	-2.49802	0.020822	0.183706	-3.48065	IFFO2	1	-2.46804	0.0218764	0.189426
NCKAP5L	-0.30752	-0.0627731	-2.35494	0.0227432	0.193734	-3.83735	NCKAP5L	25	-2.36812	0.0219627	0.189541
HNRNPUL2	0.22066	0.0261732	2.46308	0.0174848	0.167746	-3.60708	HNRNPUL2	4	2.36798	0.0219704	0.189541
TBC1D9B	-0.232537	0.235994	-2.32968	0.0241597	0.200513	-3.88997	TBC1D9B	81	-2.3678	0.0219798	0.189541
CCNY	-0.277137	0.175201	-2.35349	0.0228226	0.193871	-3.84039	CCNY	28	-2.3677	0.0219851	0.189541
DNMBP	0.331895	0.104242	2.33786	0.0236928	0.197849	-3.87299	DNMBP	91	2.36765	0.0219878	0.189541
HAUS8	-0.183644	-0.0524645	-2.36236	0.0223417	0.191352	-3.82182	HAUS8	27	-2.36759	0.0219913	0.189541
OSGEPL1	0.28561	0.201947	2.39374	0.0207122	0.183025	-3.75566	OSGEPL1	6	2.36644	0.0220521	0.18992
NRP1	-1.1458	-0.84957	-2.34727	0.0231652	0.19542	-3.85338	NRP1	12	-2.36543	0.022106	0.19023
ADPRHL2	-0.176854	0.113744	-2.31681	0.0249118	0.204932	-3.91663	ADPRHL2	74	-2.36512	0.0221224	0.19023
METTL5	0.289424	-0.197342	2.38022	0.0214007	0.186752	-3.78425	METTL5	8	2.36457	0.0221515	0.19023
NDUFB10	-0.187763	0.0771219	-2.32804	0.0242547	0.201004	-3.89339	NDUFB10	56	-2.36449	0.0221561	0.19023
JSRP1	-0.994014	-0.669172	-2.91616	0.013907	0.149602	-2.7474	JSRP1	2	-2.62818	0.0221809	0.190297
ARF6	-0.160335	0.0521329	-2.30831	0.0254196	0.206462	-3.93416	ARF6	73	-2.36199	0.0222897	0.191084
DCLRE1B	0.195035	-0.0318929	2.48922	0.0163911	0.161119	-3.55021	DCLRE1B	4	2.36031	0.0223803	0.191714
SLC39A13	-0.686253	0.0347132	-2.43033	0.020668	0.18299	-3.56272	SLC39A13	1	-2.39295	0.0223989	0.191726
ZFYVE26	-0.356979	0.0828131	-2.33747	0.0237151	0.197849	-3.87381	ZFYVE26	44	-2.35939	0.0224299	0.191845
USP25	-0.195358	0.107025	-2.31154	0.0252256	0.206082	-3.92751	USP25	87	-2.35853	0.0224764	0.192096
RAB27B	-0.621757	-0.347883	-2.42839	0.0207615	0.183317	-3.64061	RAB27B	1	-2.39076	0.0225129	0.192261
ACAA2	0.305312	0.468302	2.32212	0.0245991	0.203256	-3.90565	ACAA2	140	2.35695	0.0225616	0.192379
HSPG2	-0.841366	0.518368	-2.34635	0.0232165	0.195438	-3.8553	HSPG2	3	-2.35691	0.022564	0.192379
NFAT5	0.221417	-0.085192	2.37588	0.021626	0.187839	-3.79339	NFAT5	13	2.35665	0.0225783	0.192379
MTERF2	-0.465521	0.357384	-2.37657	0.0215898	0.18767	-3.79193	MTERF2	2	-2.35599	0.0226138	0.192536
HAT1	0.194184	-0.0238441	2.29865	0.0260077	0.208434	-3.95401	HAT1	128	2.35361	0.0227436	0.193494
IRF5	0.763096	-0.531415	2.34082	0.0235255	0.197002	-3.86682	IRF5	5	2.35307	0.0227732	0.193538
MORC2	-0.287949	0.138241	-2.32146	0.0246376	0.203281	-3.90701	MORC2	81	-2.35288	0.0227834	0.193538
MGAT4A	-0.60126	-0.44905	-2.37023	0.0219226	0.189387	-3.80529	MGAT4A	1	-2.35222	0.0228198	0.1937
SMC5	-0.1857	0.153198	-2.2981	0.0260415	0.208555	-3.95514	SMC5	104	-2.35189	0.0228377	0.193705
NSRP1	-0.22876	0.0497659	-2.32832	0.0242381	0.201004	-3.89279	NSRP1	41	-2.3515	0.0228594	0.193743
AGPAT2	-0.370281	0.181957	-2.35446	0.0227694	0.193734	-3.83835	AGPAT2	7	-2.35044	0.0229175	0.194088
GNB1	-0.20944	0.231695	-2.30568	0.0255788	0.206462	-3.93958	GNB1	81	-2.34726	0.0230931	0.195413
VAV1	-0.417747	0.0406668	-2.32022	0.0247106	0.203665	-3.90958	VAV1	113	-2.34698	0.0231088	0.195413
IFT22	-0.322598	0.114301	-2.3541	0.0227892	0.193734	-3.83911	IFT22	8	-2.34599	0.0231634	0.195608
WDR1	-0.260651	-0.00223908	-2.29959	0.0259499	0.208269	-3.95208	WDR1	355	-2.34593	0.0231669	0.195608
PARP9	-0.415622	-0.0423203	-2.32145	0.0246385	0.203281	-3.90704	PARP9	60	-2.34481	0.0232293	0.195959
C1orf112	0.286949	-0.33684	2.336	0.0237985	0.19825	-3.87687	C1orf112	21	2.34456	0.0232435	0.195959
DNASE2	0.396182	-0.0432445	2.33976	0.0235851	0.197354	-3.86902	DNASE2	10	2.3442	0.0232632	0.195978
DENND11	-0.376092	-0.0965122	-2.33432	0.0238941	0.198899	-3.88036	DENND11	14	-2.34193	0.02339	0.196898
TRIM27	0.144392	-0.0271189	2.34729	0.0231641	0.19542	-3.85333	TRIM27	26	2.34091	0.0234476	0.197098
PAPSS1	0.220776	-0.0146004	2.29312	0.0263502	0.210551	-3.96536	PAPSS1	138	2.34066	0.0234617	0.197098
FOS	0.843446	0.196237	2.4694	0.0221485	0.190742	-3.53539	FOS	1	2.43564	0.0234666	0.197098
BNIP2	-0.207325	-0.00461304	-2.35102	0.0229584	0.194431	-3.84556	BNIP2	17	-2.34022	0.0234861	0.197114
RBMX2	0.157132	-0.134292	2.36449	0.0222275	0.19099	-3.81735	RBMX2	19	2.33941	0.0235319	0.19735
COX7C	-0.380534	0.071551	-2.33665	0.0237612	0.198087	-3.8755	COX7C	9	-2.33838	0.0235897	0.197687
LRFN2	-1.18256	-0.11112	-2.3402	0.0244688	0.202329	-3.87285	LRFN2	1	-2.35187	0.0237033	0.198423
PARK7	0.169965	0.0506001	2.26141	0.0283911	0.219927	-4.02996	PARK7	228	2.33621	0.0237129	0.198423
GLT8D1	0.463709	0.0705623	2.32593	0.024377	0.201868	-3.89776	GLT8D1	10	2.33453	0.0238085	0.198945
ATP1A1	-0.322847	-0.0217189	-2.29998	0.025926	0.208227	-3.95128	ATP1A1	197	-2.33449	0.0238108	0.198945
DNPEP	-0.186702	0.138452	-2.28981	0.0265571	0.211324	-3.97214	DNPEP	71	-2.33277	0.0239088	0.199615
GADD45GIP1	-0.248403	-0.0222453	-2.30844	0.0254118	0.206462	-3.93389	GADD45GIP1	39	-2.32966	0.0240868	0.20095
MRPL20	-0.209177	-0.00247778	-2.3384	0.0236621	0.197849	-3.87186	MRPL20	17	-2.32851	0.0241535	0.201357
PHYH	0.527403	0.288511	2.31333	0.0251182	0.205573	-3.9238	PHYH	14	2.32681	0.0242513	0.202022
CTDSP1	-0.250214	0.255138	-2.35204	0.0229022	0.1944	-3.84343	CTDSP1	8	-2.32609	0.0242929	0.202218
DLST	-0.300898	0.195634	-2.29236	0.0263976	0.210551	-3.96692	DLST	117	-2.32545	0.0243301	0.202378
RIOK2	-0.421624	0.0110915	-2.30266	0.0257624	0.207508	-3.94579	RIOK2	51	-2.3246	0.0243797	0.202578
MPHOSPH8	0.131433	-0.00462077	2.26381	0.0282318	0.21935	-4.0251	MPHOSPH8	65	2.32442	0.0243904	0.202578
INPP1	0.70856	-0.594672	2.30972	0.0253343	0.206462	-3.93124	INPP1	7	2.32293	0.0244771	0.203147
UBLCP1	0.679722	-0.140771	2.30214	0.025794	0.207613	-3.94685	UBLCP1	49	2.32238	0.0245093	0.203262
EIF4E3	1.11938	-0.36042	2.40486	0.0249883	0.205375	-3.65317	EIF4E3	1	2.4074	0.0245272	0.203262
ZBED4	0.162501	0.135376	2.3093	0.0253597	0.206462	-3.93211	ZBED4	32	2.32159	0.0245555	0.203346
CUEDC2	0.315975	-0.0864512	2.30325	0.0257259	0.207363	-3.94456	CUEDC2	32	2.32074	0.0246054	0.203605
MAP2K1	-0.224108	-0.042955	-2.28677	0.0267479	0.211939	-3.97835	MAP2K1	64	-2.32014	0.0246402	0.203605
GTF2E1	0.125642	-0.0696979	2.24218	0.0296969	0.224745	-4.06881	GTF2E1	82	2.31986	0.0246571	0.203605
MRPL14	-0.228665	-0.0673157	-2.34089	0.0235216	0.197002	-3.86668	MRPL14	11	-2.31913	0.0246996	0.203605
ZNF706	-0.340134	-0.0596372	-2.35416	0.0227857	0.193734	-3.83898	ZNF706	3	-2.31899	0.0247079	0.203605
PLIN2	-0.74252	0.36881	-2.3006	0.0258882	0.208222	-3.95002	PLIN2	24	-2.31875	0.0247221	0.203605
YWHAH	-0.148546	0.0338221	-2.22837	0.0306666	0.227005	-4.09653	YWHAH	238	-2.31854	0.0247342	0.203605
CASC4	0.199208	-0.155742	2.29226	0.0264035	0.210551	-3.96711	CASC4	44	2.31845	0.02474	0.203605
TNFRSF1B	-0.88513	-0.486509	-2.30675	0.0255136	0.206462	-3.93737	TNFRSF1B	3	-2.31827	0.0247505	0.203605
MRPL38	-0.194297	-0.0231249	-2.30591	0.0255647	0.206462	-3.9391	MRPL38	30	-2.3176	0.0247896	0.203777
TPM3	-0.142423	0.019375	-2.21018	0.0319867	0.232547	-4.13282	TPM3	408	-2.31424	0.0249891	0.205157
UQCRC1	-0.222878	0.088534	-2.26669	0.0280419	0.218785	-4.01926	UQCRC1	158	-2.31415	0.0249941	0.205157
TAF8	0.119108	-0.0192648	2.34113	0.0235083	0.197002	-3.86618	TAF8	24	2.31379	0.0250158	0.205184
MARS2	0.318291	-0.0238904	2.2991	0.02598	0.208361	-3.95309	MARS2	24	2.31202	0.025121	0.205897
NDUFA12	-0.285486	0.0866329	-2.31152	0.0252265	0.206082	-3.92754	NDUFA12	14	-2.31083	0.0251923	0.206245
CRAT	0.761739	0.152333	2.29236	0.0263972	0.210551	-3.96691	CRAT	24	2.31052	0.0252112	0.206245
MRPL32	-0.273228	0.00929455	-2.3247	0.0244483	0.202308	-3.9003	MRPL32	9	-2.31039	0.0252188	0.206245
PEX1	0.294468	0.0719733	2.28741	0.0267079	0.211939	-3.97705	PEX1	44	2.30977	0.025256	0.206253
METTL25	-0.253631	-0.117161	-2.3336	0.0239348	0.199089	-3.88183	METTL25	8	-2.30972	0.0252593	0.206253
SPTA1	-0.853695	0.173569	-2.32469	0.0252356	0.206082	-3.83992	SPTA1	1	-2.32227	0.025275	0.206253
ESF1	0.24835	-0.180336	2.27257	0.0276573	0.216691	-4.00731	ESF1	88	2.30792	0.025367	0.206754
SHLD1	0.274639	-0.0609102	2.40241	0.0202813	0.180932	-3.73726	SHLD1	2	2.30782	0.0253733	0.206754
ATF7IP	0.221221	0.0786739	2.26999	0.0278259	0.217555	-4.01257	ATF7IP	77	2.30706	0.0254193	0.206953
SNRPF	0.132448	0.0186992	2.25774	0.0286365	0.220505	-4.0374	SNRPF	55	2.3068	0.0254348	0.206953
CNST	-0.292596	0.251537	-2.2871	0.0267274	0.211939	-3.97768	CNST	36	-2.30625	0.0254679	0.207072
GEMIN2	0.242287	0.0952105	2.3054	0.0255957	0.206462	-3.94015	GEMIN2	18	2.30532	0.0255246	0.207333
SKI	-0.317454	-0.123532	-2.3063	0.0255412	0.206462	-3.9383	SKI	11	-2.30485	0.025553	0.207333
NIPA2	0.235266	-0.046514	2.55128	0.0140391	0.150148	-3.4134	NIPA2	1	2.30481	0.0255555	0.207333
PELI2	0.373932	-0.0330881	2.29692	0.0261146	0.208843	-3.95757	PELI2	13	2.3036	0.0256291	0.207779
ABHD13	0.237447	-0.0191412	2.39753	0.020523	0.182796	-3.74763	ABHD13	3	2.303	0.0256655	0.207897
PSMB8	-0.204272	0.0149556	-2.25979	0.0284995	0.220113	-4.03326	PSMB8	89	-2.30275	0.0256807	0.207897
NCF1	-0.926587	-0.260102	-2.28287	0.0269949	0.213292	-3.98631	NCF1	32	-2.30185	0.0257356	0.208083
CKB	-0.745732	0.0653295	-2.2911	0.0264764	0.210982	-3.9695	CKB	4	-2.30163	0.0257487	0.208083
CHD1	-0.199293	-0.0122918	-2.25186	0.0290328	0.222466	-4.04928	CHD1	120	-2.30144	0.0257604	0.208083
MRPL13	-0.200605	-0.0206154	-2.28897	0.0266098	0.211593	-3.97386	MRPL13	30	-2.30115	0.0257781	0.208083
PPP2R2A	0.199632	-0.00337774	2.26238	0.0283268	0.219879	-4.028	PPP2R2A	69	2.30064	0.0258094	0.208186
MRPL43	-0.242752	0.0339558	-2.28459	0.026886	0.212582	-3.98281	MRPL43	30	-2.29899	0.0259103	0.208791
METTL9	0.264513	0.022992	2.31497	0.0250207	0.205375	-3.92042	METTL9	9	2.29881	0.0259218	0.208791
STARD13	-1.04779	0.14574	-2.2904	0.0265198	0.211178	-3.97093	STARD13	1	-2.29819	0.0259595	0.208945
CD74	-0.564025	0.519957	-2.27452	0.0275309	0.216375	-4.00334	CD74	61	-2.29566	0.0261159	0.210053
ARAP1	-0.285307	-0.291164	-2.26451	0.0281858	0.219144	-4.02369	ARAP1	83	-2.29507	0.0261524	0.210195
YWHAE	0.154406	0.118834	2.2011	0.0326649	0.235184	-4.15087	YWHAE	592	2.2945	0.0261876	0.210327
ANXA4	0.426846	0.0133425	2.26633	0.0280659	0.218805	-4.02	ANXA4	203	2.29372	0.026236	0.210439
ARF4	0.209058	-0.058392	2.26219	0.0283392	0.219879	-4.02838	ARF4	56	2.29367	0.026239	0.210439
MAP10	-0.545303	-0.0961223	-2.32917	0.0247214	0.203665	-3.89432	MAP10	1	-2.30149	0.0262847	0.210511
SMURF2	-0.215162	-0.23592	-2.35071	0.0229754	0.194431	-3.8462	SMURF2	6	-2.29292	0.0262857	0.210511
SCAND1	-0.254856	-0.104901	-2.40424	0.0201913	0.180862	-3.73337	SCAND1	2	-2.29236	0.0263209	0.210642
MED20	0.162439	0.0209371	2.31425	0.0250636	0.205377	-3.92191	MED20	18	2.29059	0.0264311	0.211374
ITGA9	-1.1618	-0.729128	-2.28612	0.0272221	0.214633	-3.98188	ITGA9	1	-2.29682	0.0264577	0.211435
ANKRD13B	0.50781	-0.0732446	2.31817	0.0248313	0.20442	-3.91382	ANKRD13B	1	2.28831	0.0265741	0.212214
PAIP1	0.160453	-0.0496812	2.24699	0.029365	0.224264	-4.05911	PAIP1	54	2.28517	0.0267721	0.213642
FASTKD5	0.204862	-0.100325	2.25968	0.0285069	0.220113	-4.03348	FASTKD5	43	2.28424	0.0268305	0.213956
AIDA	-0.220585	0.17751	-2.26582	0.0280994	0.218805	-4.02103	AIDA	34	-2.28305	0.0269062	0.21438
SETD9	-0.359548	0.26121	-2.36391	0.0222585	0.191109	-3.81856	SETD9	1	-2.2828	0.026922	0.21438
MIER1	0.146424	-0.0182634	2.2325	0.0303736	0.226519	-4.08825	MIER1	63	2.28171	0.0269916	0.214782
TRAF4	-0.333347	-0.0811291	-2.27282	0.0276415	0.216691	-4.00681	TRAF4	17	-2.28111	0.0270299	0.214934
KLHL21	-0.371091	-0.096601	-2.45289	0.0194391	0.1771	-3.58823	KLHL21	1	-2.30782	0.0270582	0.215006
STS	-0.617927	0.126079	-2.2678	0.0279692	0.218449	-4.01701	STS	8	-2.27997	0.0271024	0.215205
C9orf85	-0.234305	-0.089951	-2.41514	0.0196628	0.178255	-3.71014	C9orf85	2	-2.27945	0.0271355	0.215314
HERC4	0.170878	0.109889	2.22822	0.0306769	0.227005	-4.09681	HERC4	79	2.27648	0.0273264	0.216438
ZBED5	0.168069	0.0873313	2.28685	0.0267428	0.211939	-3.97818	ZBED5	21	2.27617	0.0273464	0.216438
THNSL1	0.335571	0.150984	2.25333	0.0289332	0.222026	-4.04631	THNSL1	50	2.27591	0.027363	0.216438
UBTF	-0.134621	0.0484518	-2.17808	0.03444	0.243063	-4.19631	UBTF	214	-2.27576	0.0273727	0.216438
DUSP1	0.78953	0.0821376	2.27631	0.027415	0.215698	-3.99969	DUSP1	1	2.27575	0.0273737	0.216438
ZNF639	0.144018	-0.0488856	2.35701	0.0226304	0.193265	-3.83302	ZNF639	11	2.27435	0.0274636	0.216996
UBA3	0.135827	0.124289	2.19372	0.0332245	0.238101	-4.16546	UBA3	117	2.27358	0.0275134	0.217236
KLHL24	0.298938	0.298496	2.30763	0.0254606	0.206462	-3.93556	KLHL24	4	2.2732	0.0275386	0.217281
DIP2C	0.800062	0.172559	2.26576	0.028103	0.218805	-4.02114	DIP2C	2	2.2727	0.0275709	0.217383
PTPRD	-0.76271	-0.756398	-2.26122	0.0284043	0.219927	-4.03036	PTPRD	4	-2.2722	0.027603	0.217483
PKP4	-0.360447	-0.0644089	-2.26178	0.0283666	0.219927	-4.02922	PKP4	17	-2.27167	0.0276378	0.217604
RTL6	0.473156	-0.344697	2.40894	0.021909	0.189387	-3.61021	RTL6	1	2.3042	0.0276659	0.217672
FAM131A	-1.55168	0.201597	-4.16649	0.00838505	0.114208	-2.24806	FAM131A	1	-2.90351	0.0277397	0.217728
HSPA9	0.149693	-0.0227391	2.17306	0.0348388	0.243784	-4.20618	HSPA9	734	2.26983	0.0277577	0.217728
ARHGEF11	-0.638144	0.0957944	-2.25272	0.0289747	0.222192	-4.04755	ARHGEF11	22	-2.26982	0.0277584	0.217728
PPP1R14C	-1.7746	0.884099	-2.35834	0.0291603	0.223005	-3.56383	PPP1R14C	1	-2.37408	0.0277724	0.217728
ZNF738	-0.498385	-0.0584911	-2.30003	0.0259231	0.208227	-3.95119	ZNF738	1	-2.26936	0.0277884	0.217728
TMED4	0.282894	-0.0721601	2.25974	0.0285029	0.220113	-4.03336	TMED4	22	2.26934	0.0277896	0.217728
ULBP2	-0.749998	-0.435729	-2.27055	0.0277892	0.21742	-4.01143	ULBP2	1	-2.26799	0.0278778	0.218234
AP3M2	-0.345077	0.0144199	-2.27062	0.0277846	0.21742	-4.01128	AP3M2	8	-2.26776	0.0278933	0.218234
LETM2	0.453292	0.0340811	2.30819	0.025427	0.206462	-3.93441	LETM2	1	2.26692	0.0279483	0.218406
MRPL17	-0.239361	0.0413538	-2.28592	0.0268017	0.212215	-3.98009	MRPL17	10	-2.26683	0.0279542	0.218406
ACVR1B	-0.298129	-0.0539391	-2.31404	0.025076	0.205377	-3.92234	ACVR1B	3	-2.26615	0.0279989	0.218602
ARHGAP23	0.310583	-0.0144658	2.27291	0.0276356	0.216691	-4.00663	ARHGAP23	8	2.26493	0.0280792	0.219077
OFD1	-0.24725	0.152663	-2.23103	0.0304773	0.226519	-4.09119	OFD1	75	-2.26304	0.0282044	0.219882
PET117	-0.282725	-0.134843	-2.34415	0.0233388	0.196025	-3.85988	PET117	2	-2.26252	0.0282387	0.219882
HECA	0.296053	0.2372	2.25905	0.0285487	0.220284	-4.03475	HECA	15	2.26204	0.0282704	0.219882
USP9X	-0.156519	0.110782	-2.19034	0.0334843	0.239394	-4.17216	USP9X	161	-2.26203	0.0282711	0.219882
GNG12	-1.03229	-0.557132	-2.24922	0.0292128	0.223254	-4.05462	GNG12	2	-2.26098	0.0283406	0.219882
ZFAND5	-0.413043	0.0367249	-2.25664	0.02871	0.220879	-4.03962	ZFAND5	8	-2.26051	0.0283723	0.219882
AKNA	-0.337737	-0.192752	-2.23752	0.030021	0.225258	-4.07818	AKNA	53	-2.2604	0.0283794	0.219882
PITPNM2	0.593401	0.00531496	2.24289	0.0296473	0.224745	-4.06737	PITPNM2	26	2.26037	0.0283812	0.219882
RAB8B	-0.286263	-0.0699444	-2.24419	0.0295579	0.224745	-4.06476	RAB8B	31	-2.26037	0.0283816	0.219882
QPRT	0.584183	0.140042	2.24555	0.0294642	0.224562	-4.06202	QPRT	14	2.25997	0.0284079	0.219882
CRMP1	-1.23033	-0.204014	-2.24066	0.0298022	0.224768	-4.07187	CRMP1	59	-2.25987	0.0284146	0.219882
RANBP9	0.167692	0.0345606	2.21455	0.0316654	0.231499	-4.12413	RANBP9	71	2.25982	0.0284181	0.219882
KLHL3	-0.507283	-0.378331	-2.38552	0.024033	0.199758	-3.73931	KLHL3	1	-2.30655	0.0284469	0.219953
BTBD11	0.857815	-0.319618	2.24223	0.0296928	0.224745	-4.06869	BTBD11	14	2.25902	0.0284713	0.219982
DCLRE1C	0.253436	0.205279	2.2597	0.0285056	0.220113	-4.03344	DCLRE1C	16	2.25874	0.02849	0.219982
ERCC6L2	-0.263093	-0.118103	-2.30743	0.0254726	0.206462	-3.93597	ERCC6L2	4	-2.25803	0.0285374	0.220005
OXA1L	0.198247	0.00894131	2.25777	0.0286343	0.220505	-4.03734	OXA1L	22	2.2578	0.0285531	0.220005
CYP2U1	0.544085	-0.386064	2.25161	0.0290501	0.222466	-4.04979	CYP2U1	5	2.25758	0.0285677	0.220005
ANKHD1-EIF4EBP3	0.226886	-0.0197267	2.50835	0.0156307	0.158202	-3.50832	ANKHD1-EIF4EBP3	1	2.25727	0.0285885	0.220005
RAB3D	-0.812054	-0.523054	-2.2416	0.0297366	0.224745	-4.06996	RAB3D	10	-2.25723	0.0285912	0.220005
ARHGAP1	-0.242246	0.0241644	-2.21928	0.0313201	0.230545	-4.11469	ARHGAP1	108	-2.25645	0.0286435	0.220108
SDE2	0.238528	0.069207	2.23232	0.0303867	0.226519	-4.08862	SDE2	46	2.25644	0.0286439	0.220108
BRD2	-0.184088	-0.13877	-2.22119	0.0311815	0.229677	-4.11087	BRD2	57	-2.25566	0.0286966	0.220362
CAMKK1	0.35802	-0.113273	2.29692	0.0261147	0.208843	-3.95758	CAMKK1	2	2.25521	0.0287267	0.220367
USP47	0.115138	-0.0347443	2.13646	0.0378665	0.255502	-4.27748	USP47	192	2.25496	0.028744	0.220367
THEMIS2	-0.636171	-0.246541	-2.24116	0.0297674	0.224745	-4.07085	THEMIS2	10	-2.25477	0.0287564	0.220367
POLE3	-0.242739	-0.017929	-2.23142	0.0304502	0.226519	-4.09042	POLE3	43	-2.25399	0.0288091	0.22062
CYHR1	0.239288	0.178395	2.24617	0.0294214	0.224541	-4.06076	CYHR1	23	2.25339	0.0288499	0.220782
REV1	0.170696	0.0146438	2.31523	0.0250052	0.205375	-3.91988	REV1	9	2.25177	0.0289595	0.220979
MRPL58	-0.234295	-0.0390386	-2.2394	0.0298897	0.224768	-4.07439	MRPL58	28	-2.25152	0.0289765	0.220979
GPM6B	-1.33589	-0.443456	-2.23909	0.0299112	0.224768	-4.07502	GPM6B	1	-2.2513	0.028991	0.220979
KIZ	0.154783	-0.144624	2.28145	0.0270857	0.213859	-3.98922	KIZ	17	2.25119	0.028999	0.220979
PER2	-0.22316	0.0473547	-2.27933	0.0272212	0.214633	-3.99355	PER2	9	-2.25111	0.0290042	0.220979
TAPBP	-0.209395	0.00115851	-2.2773	0.0273514	0.2155	-3.99768	TAPBP	11	-2.2511	0.0290046	0.220979
RTN4RL2	-0.876457	0.0629009	-2.2419	0.0297163	0.224745	-4.06937	RTN4RL2	2	-2.25095	0.0290151	0.220979
STAMBPL1	0.527924	-0.37901	2.23304	0.0303357	0.226519	-4.08717	STAMBPL1	29	2.25068	0.0290336	0.220979
SNCA	-1.25483	0.302427	-2.23878	0.0299329	0.224768	-4.07564	SNCA	1	-2.25012	0.0290717	0.221044
CDC37	-0.108903	0.0321593	-2.1183	0.0394532	0.261366	-4.31251	CDC37	211	-2.24997	0.0290816	0.221044
MRPL40	-0.211104	-0.0184277	-2.23358	0.0302971	0.226519	-4.08607	MRPL40	32	-2.24853	0.0291798	0.221451
ZNF71	0.272117	0.127024	2.27409	0.027559	0.216375	-4.00423	ZNF71	6	2.2484	0.0291884	0.221451
ITGA2	-0.83525	-0.214177	-2.23121	0.0304647	0.226519	-4.09083	ITGA2	15	-2.24801	0.0292153	0.221451
SSH3	-1.18211	-0.188435	-2.23263	0.0303642	0.226519	-4.08798	SSH3	3	-2.24739	0.0292578	0.221451
GALE	0.235119	-0.181557	2.22928	0.0306015	0.226747	-4.09469	GALE	35	2.24723	0.0292688	0.221451
NOL4L	0.499664	-0.309165	2.23727	0.0300384	0.225258	-4.07868	NOL4L	9	2.24691	0.0292908	0.221451
ZNF382	0.637226	-0.0243747	2.32261	0.0273941	0.215685	-3.86132	ZNF382	1	2.28931	0.0292964	0.221451
DDX54	-0.198272	0.0373152	-2.20581	0.0323119	0.233882	-4.14152	DDX54	84	-2.24682	0.0292966	0.221451
DYNC2H1	-0.848825	0.30412	-2.22973	0.03057	0.226663	-4.0938	DYNC2H1	15	-2.24658	0.0293132	0.221451
TUBB4B	-0.215498	0.165365	-2.26482	0.0281653	0.219137	-4.02306	TUBB4B	12	-2.24491	0.0294281	0.222169
ARHGAP5	-0.307079	-0.00651533	-2.21593	0.0315645	0.231432	-4.12139	ARHGAP5	90	-2.24455	0.0294523	0.222174
IKBIP	-0.536502	0.00385471	-2.22343	0.03102	0.228939	-4.1064	IKBIP	63	-2.24432	0.0294684	0.222174
NPY	-1.24677	-0.725184	-2.29207	0.0305563	0.226663	-3.8538	NPY	1	-2.30379	0.0295159	0.222342
ZAP70	0.47819	-0.429688	2.21893	0.0313459	0.230584	-4.1154	ZAP70	168	2.24342	0.0295305	0.222342
NBEA	0.661156	-0.181065	2.24113	0.0297692	0.224745	-4.07091	NBEA	2	2.24287	0.0295687	0.22248
GRASP	1.06248	-0.260071	2.25638	0.0303775	0.226519	-3.98087	GRASP	1	2.26416	0.0297032	0.223232
KMT5C	0.237753	0.0732636	2.24415	0.0295604	0.224745	-4.06483	KMT5C	16	2.24085	0.0297084	0.223232
DUSP11	0.222152	0.00402631	2.23573	0.030146	0.225914	-4.08176	DUSP11	22	2.23983	0.029779	0.223612
AVL9	0.2167	-0.0778941	2.22445	0.0309467	0.228548	-4.10436	AVL9	30	2.2376	0.0299345	0.224371
ST3GAL5	-0.730515	-0.354229	-2.25649	0.029705	0.224745	-4.04168	ST3GAL5	1	-2.25141	0.029936	0.224371
GALNT2	-0.348655	0.0856031	-2.21168	0.0318765	0.232148	-4.12985	GALNT2	84	-2.23752	0.0299402	0.224371
VCL	-0.351064	0.447116	-2.20619	0.0322835	0.233882	-4.14077	VCL	265	-2.237	0.0299765	0.224427
CTNNA1	-0.41688	0.278001	-2.2139	0.0317132	0.231612	-4.12543	CTNNA1	68	-2.23652	0.0300099	0.224427
RFWD3	0.191201	-0.0646872	2.28799	0.026671	0.211929	-3.97585	RFWD3	8	2.23642	0.0300166	0.224427
TMEM203	0.438084	-0.122705	2.52763	0.0178721	0.169861	-3.30668	TMEM203	1	2.2909	0.0300321	0.224427
MPST	0.152426	0.223587	2.2078	0.0321633	0.233226	-4.13756	MPST	43	2.23578	0.0300619	0.224427
UAP1L1	0.938212	-0.21332	2.21702	0.0314845	0.231148	-4.1192	UAP1L1	37	2.23569	0.0300679	0.224427
CRY1	0.234103	-0.135025	2.25798	0.02862	0.220505	-4.03691	CRY1	9	2.23497	0.0301185	0.224551
GIMAP4	-1.23796	-0.48484	-2.21759	0.0314433	0.230998	-4.11807	GIMAP4	9	-2.23476	0.030133	0.224551
SMG9	-0.132838	-0.0304574	-2.22785	0.0307039	0.227055	-4.09757	SMG9	31	-2.23447	0.0301537	0.224551
GDI2	-0.149214	0.132348	-2.14292	0.0373157	0.253819	-4.26497	GDI2	544	-2.23427	0.0301676	0.224551
TMEM268	-0.364665	0.0760475	-2.30622	0.0255456	0.206462	-3.93845	TMEM268	1	-2.23403	0.0301848	0.224551
H2BC1	0.381273	0.0939233	2.43647	0.0211803	0.185842	-3.63238	H2BC1	1	2.27547	0.0302119	0.224603
TAF1C	-0.260272	0.0251583	-2.24235	0.0296847	0.224745	-4.06846	TAF1C	11	-2.23287	0.0302662	0.224756
LAPTM5	-0.522886	0.204962	-2.22231	0.031101	0.229385	-4.10865	LAPTM5	9	-2.23278	0.0302726	0.224756
VAMP8	0.863109	-0.0194726	2.2145	0.0316693	0.231499	-4.12424	VAMP8	17	2.23161	0.0303555	0.225222
GFPT1	0.365174	-0.195414	2.20089	0.0326808	0.235184	-4.15128	GFPT1	164	2.2291	0.0305332	0.226391
IL21R	-0.669071	-0.0299839	-2.25235	0.0297038	0.224745	-3.98627	IL21R	1	-2.23802	0.0305925	0.22668
CRACR2B	0.694182	-0.335008	2.41293	0.0254889	0.206462	-3.56759	CRACR2B	1	2.31877	0.030626	0.226776
LCORL	0.247685	0.131051	2.24566	0.0294564	0.224562	-4.06179	LCORL	9	2.22751	0.030646	0.226776
TBC1D22B	-0.192619	-0.257197	-2.2389	0.0299242	0.224768	-4.07539	TBC1D22B	17	-2.22718	0.0306698	0.226802
ENOX2	0.334272	-0.0538916	2.27433	0.027543	0.216375	-4.00372	ENOX2	2	2.22584	0.0307656	0.227306
FASTK	-0.237858	-0.0263726	-2.34544	0.0232669	0.19568	-3.85719	FASTK	2	-2.22541	0.0307966	0.227306
DENND4B	-0.325339	0.265646	-2.21149	0.0318903	0.232148	-4.13023	DENND4B	25	-2.22518	0.0308128	0.227306
CISD2	0.238904	0.0269567	2.21458	0.0316629	0.231499	-4.12407	CISD2	26	2.22509	0.030819	0.227306
SEPTIN9	-0.236048	0.00822274	-2.1775	0.0344856	0.243063	-4.19744	SEPTIN9	426	-2.22468	0.0308486	0.227374
PHF20	0.186879	-0.0946978	2.21292	0.0317851	0.231834	-4.12738	PHF20	30	2.22418	0.0308847	0.22749
HDGF	0.234908	0.293288	2.17575	0.0346241	0.243204	-4.20088	HDGF	369	2.22246	0.0310085	0.228252
CD96	-0.803555	-0.33903	-2.20548	0.0323366	0.233882	-4.14218	CD96	15	-2.22197	0.0310434	0.228359
COX7A2L	-0.391889	-0.0196728	-2.21498	0.031634	0.231499	-4.12328	COX7A2L	11	-2.22142	0.0310832	0.228483
PCNT	-0.194394	0.0502247	-2.16686	0.0353358	0.245486	-4.21832	PCNT	205	-2.22103	0.0311114	0.228483
PITPNM1	0.324302	0.0336914	2.20839	0.0321199	0.233171	-4.1364	PITPNM1	23	2.22089	0.0311216	0.228483
FMR1	-0.172977	0.0827573	-2.1706	0.0350352	0.244395	-4.211	FMR1	88	-2.21831	0.0313085	0.229705
BTN2A1	-0.249564	0.0270587	-2.24204	0.0297065	0.224745	-4.06909	BTN2A1	7	-2.21629	0.0314557	0.23062
MMP14	-1.2092	-0.0826178	-2.20514	0.0323618	0.233882	-4.14285	MMP14	1	-2.21598	0.0314785	0.23062
PHYHD1	-0.872178	0.349493	-2.21202	0.0318515	0.232148	-4.12918	PHYHD1	1	-2.21575	0.031495	0.23062
THTPA	-0.324743	0.258608	-2.20465	0.0323979	0.233882	-4.14381	THTPA	20	-2.2152	0.0315349	0.230761
NDUFS8	-0.199417	0.165215	-2.18971	0.033533	0.239589	-4.1734	NDUFS8	45	-2.21476	0.0315673	0.230835
CC2D1A	-0.173391	-0.00472635	-2.17122	0.0349858	0.24432	-4.20979	CC2D1A	75	-2.2145	0.0315862	0.230835
ZNF839	0.21469	-0.0118379	2.25509	0.0288148	0.221269	-4.04277	ZNF839	7	2.21338	0.0316686	0.231168
NCAPG2	-0.203939	-0.112653	-2.16985	0.0350949	0.244659	-4.21246	NCAPG2	113	-2.21332	0.031673	0.231168
SERINC3	-0.221991	0.0725647	-2.2503	0.029139	0.222994	-4.05243	SERINC3	7	-2.21268	0.0317196	0.231357
WDR5B	0.484296	-0.0467645	2.33136	0.0268636	0.212555	-3.84421	WDR5B	1	2.25285	0.0317646	0.231383
ARHGAP12	-0.237679	0.032949	-2.20818	0.032135	0.233171	-4.1368	ARHGAP12	20	-2.21184	0.0317816	0.231383
CA8	0.554936	-0.64956	2.20463	0.0324	0.233882	-4.14387	CA8	5	2.21146	0.0318096	0.231383
NFATC4	0.964926	0.0914384	2.19484	0.033139	0.237989	-4.16325	NFATC4	11	2.21132	0.0318198	0.231383
SMNDC1	0.141192	0.00194905	2.17638	0.0345746	0.243204	-4.19965	SMNDC1	48	2.21123	0.0318265	0.231383
DDX49	0.213729	0.00651058	2.18021	0.0342727	0.242308	-4.19213	DDX49	57	2.20958	0.0319486	0.23212
EPB41	0.179224	0.0469269	2.15675	0.0361607	0.249295	-4.23808	EPB41	124	2.20888	0.0320004	0.232345
CASP8AP2	-0.31173	-0.0604658	-2.18263	0.0340826	0.241818	-4.18736	CASP8AP2	68	-2.20787	0.0320751	0.232737
TPM1	-0.247295	-0.0820862	-2.18022	0.0342716	0.242308	-4.1921	TPM1	59	-2.20733	0.0321153	0.232824
ARIH2	0.21885	0.0819384	2.17982	0.0343032	0.242308	-4.19289	ARIH2	53	2.20715	0.0321287	0.232824
CCDC124	-0.170676	-0.041636	-2.16631	0.0353801	0.245486	-4.21939	CCDC124	66	-2.20634	0.0321893	0.233112
MRPL55	-0.181709	-0.0544461	-2.22713	0.030755	0.227282	-4.09901	MRPL55	15	-2.20582	0.0322275	0.23319
GPX1	-0.969308	0.30648	-2.18735	0.0337151	0.24043	-4.17805	GPX1	33	-2.20561	0.0322435	0.23319
SNRNP35	0.16585	-0.0604386	2.25547	0.0287892	0.221224	-4.042	SNRNP35	11	2.20535	0.0322626	0.23319
WDFY4	-0.643506	0.0431285	-2.18187	0.034142	0.241933	-4.18885	WDFY4	89	-2.20235	0.0324872	0.234662
NDUFB8	-0.389538	0.0683008	-2.23022	0.030535	0.226663	-4.09282	NDUFB8	2	-2.20141	0.0325578	0.235021
CNMD	-0.502672	0.239769	-2.2453	0.0299312	0.224768	-3.99807	CNMD	1	-2.20693	0.0325945	0.235134
PPFIA1	-0.270634	0.0640159	-2.3467	0.0231969	0.19542	-3.85457	PPFIA1	1	-2.19975	0.0326831	0.235622
RAB8A	-0.159323	0.102986	-2.16215	0.0357183	0.246853	-4.22754	RAB8A	56	-2.19914	0.0327287	0.235798
ZSCAN16	0.578401	-0.0960361	2.22831	0.031128	0.229433	-4.03179	ZSCAN16	1	2.20478	0.0327554	0.235839
CEP152	-0.168994	0.101958	-2.14573	0.0370786	0.252975	-4.25952	CEP152	101	-2.19701	0.0328905	0.236659
NDUFAF7	0.234787	0.112492	2.18829	0.0336427	0.240066	-4.17621	NDUFAF7	24	2.19656	0.0329243	0.23675
CLTCL1	-0.221808	0.0827	-2.23222	0.0303932	0.226519	-4.0888	CLTCL1	7	-2.19568	0.0329911	0.237079
SESN1	-0.419355	0.128113	-2.18422	0.0339588	0.241705	-4.18423	SESN1	15	-2.19533	0.0330184	0.237122
GAPVD1	0.150683	0.0611194	2.12309	0.0390297	0.259917	-4.30331	GAPVD1	170	2.19445	0.0330851	0.2374
ANKRD16	-0.291074	0.143631	-2.19391	0.0332106	0.238101	-4.1651	ANKRD16	13	-2.19426	0.0330994	0.2374
VLDLR	0.806402	0.123288	2.17494	0.0346885	0.243204	-4.20247	VLDLR	33	2.19304	0.0331927	0.237916
KIFC3	0.709426	0.119291	2.23121	0.0319669	0.232547	-3.95342	KIFC3	1	2.21184	0.0332507	0.23818
FAM241A	-0.939015	0.218556	-2.17736	0.0344969	0.243063	-4.19772	FAM241A	5	-2.1917	0.0332951	0.238308
STK39	0.400857	0.126182	2.16785	0.0352563	0.245431	-4.21639	STK39	89	2.1915	0.0333112	0.238308
GEMIN5	-0.193037	-0.0132055	-2.14063	0.0375103	0.254526	-4.26941	GEMIN5	158	-2.19064	0.033377	0.238627
ZFR	0.0850357	0.0585599	2.02291	0.0487792	0.289572	-4.49241	ZFR	154	2.18971	0.0334483	0.238983
OSER1	-0.225549	-0.0285731	-2.41728	0.0195609	0.177907	-3.70558	OSER1	1	-2.18878	0.0335199	0.239342
SNX33	0.727352	-0.0578136	2.17991	0.0342961	0.242308	-4.19272	SNX33	3	2.18841	0.0335487	0.239395
HIF1A	-0.691149	0.0792242	-2.20545	0.0329352	0.236677	-4.07695	HIF1A	1	-2.19519	0.0336093	0.239675
DNAAF2	0.27915	-0.033453	2.17538	0.0346539	0.243204	-4.20162	DNAAF2	25	2.18734	0.0336315	0.239681
AAMDC	-0.269802	0.285314	-2.19412	0.0331942	0.238101	-4.16468	AAMDC	10	-2.18572	0.0337572	0.240295
PDE12	0.18157	0.0387766	2.14454	0.0371794	0.2532	-4.26184	PDE12	78	2.18548	0.0337754	0.240295
ITPKB	0.341369	-0.233512	2.17791	0.0344535	0.243063	-4.19664	ITPKB	15	2.1854	0.033782	0.240295
L3MBTL4	0.802372	-0.107666	2.17447	0.0347262	0.243204	-4.2034	L3MBTL4	3	2.18473	0.0338342	0.240513
MTX1	0.466266	-0.183022	2.16663	0.035354	0.245486	-4.21876	MTX1	33	2.18431	0.0338666	0.240531
MRPL1	-0.177085	-0.00437835	-2.14815	0.0368754	0.25205	-4.25482	MRPL1	62	-2.18414	0.0338797	0.240531
TAOK1	-0.168709	0.0518791	-2.14747	0.0369324	0.252285	-4.25614	TAOK1	57	-2.18254	0.0340052	0.240934
RGS18	-0.489334	-0.976705	-2.24965	0.0304898	0.226519	-3.99323	RGS18	1	-2.19961	0.034006	0.240934
TCF20	0.179748	-0.0352832	2.13216	0.0382372	0.25635	-4.2858	TCF20	121	2.18228	0.0340248	0.240934
AGTRAP	-0.410869	0.0391952	-2.18859	0.0336189	0.240049	-4.1756	AGTRAP	4	-2.18223	0.0340289	0.240934
HMX2	1.07042	-0.519499	2.18851	0.0350025	0.24432	-4.17689	HMX2	1	2.19912	0.034044	0.240934
MIPEP	0.266486	-0.14454	2.15351	0.0364286	0.250491	-4.2444	MIPEP	72	2.18137	0.0340963	0.241151
FOSL2	-0.858032	0.494198	-2.1663	0.0353814	0.245486	-4.21942	FOSL2	5	-2.17984	0.0342164	0.24171
TMEM38B	-0.473334	-0.261257	-2.18457	0.0339308	0.241705	-4.18353	TMEM38B	3	-2.17981	0.0342185	0.24171
CD274	0.624881	-0.943699	2.26548	0.0320088	0.232557	-3.81237	CD274	2	2.22968	0.034313	0.242225
VTA1	0.108199	0.0643855	2.09813	0.0412837	0.267329	-4.35112	VTA1	78	2.1779	0.0343688	0.242465
DESI2	0.488143	-0.115681	2.18049	0.0342506	0.242308	-4.19158	DESI2	3	2.17717	0.0344265	0.24272
INPPL1	-0.228248	0.234009	-2.13983	0.0375787	0.254526	-4.27097	INPPL1	99	-2.17545	0.0345632	0.243461
ZNF316	0.242849	0.0607538	2.18196	0.0341347	0.241933	-4.18867	ZNF316	13	2.17488	0.0346084	0.243461
TOP1MT	0.435759	-0.147126	2.17208	0.0349168	0.244177	-4.2081	TOP1MT	6	2.17482	0.0346129	0.243461
MYORG	0.523966	-0.208047	2.17515	0.0346722	0.243204	-4.20207	MYORG	3	2.17475	0.0346186	0.243461
NID2	-0.83516	-0.0841383	-2.16239	0.0356984	0.246853	-4.22706	NID2	3	-2.17328	0.0347351	0.244082
LAIR1	-0.346715	-0.0844514	-2.1652	0.0354703	0.245746	-4.22157	LAIR1	15	-2.17309	0.0347505	0.244082
KIF27	0.345221	0.0812526	2.18318	0.0340396	0.241818	-4.18627	KIF27	5	2.17253	0.0347948	0.24424
HAUS6	-0.225198	-0.0308469	-2.13507	0.037986	0.255502	-4.28018	HAUS6	105	-2.17176	0.0348563	0.244518
MAD2L2	0.231268	0.0412696	2.18343	0.0340199	0.241818	-4.18578	MAD2L2	12	2.17133	0.0348909	0.244608
MAP3K5	0.366231	-0.456535	2.16294	0.0356539	0.246712	-4.22599	MAP3K5	14	2.17104	0.0349142	0.244618
ZNF277	0.2472	-0.182765	2.17439	0.0347325	0.243204	-4.20356	ZNF277	14	2.17038	0.0349667	0.244649
PAK1	0.425335	-0.00930581	2.15067	0.0366649	0.251224	-4.24992	PAK1	46	2.17025	0.0349776	0.244649
RBM25	-0.109554	0.0738773	-2.04404	0.0465626	0.282818	-4.45315	RBM25	283	-2.17016	0.0349842	0.244649
RBPJ	-0.222078	0.212253	-2.15332	0.036444	0.250491	-4.24476	RBPJ	34	-2.16988	0.0350067	0.244654
CACNB1	0.520692	-0.278975	2.2011	0.0332635	0.238119	-4.15157	CACNB1	1	2.17588	0.0351191	0.245286
UROD	-0.228055	0.0767575	-2.14106	0.0374738	0.254526	-4.26858	UROD	53	-2.16691	0.0352455	0.246015
CANT1	-0.202627	-0.209592	-2.16319	0.0356329	0.246712	-4.22549	CANT1	21	-2.16383	0.0354951	0.247603
MTCH1	-0.335286	-0.0771879	-2.1531	0.0364627	0.250491	-4.2452	MTCH1	18	-2.16286	0.035574	0.247999
ETV6	-0.40476	-0.0332573	-2.14881	0.0368196	0.251976	-4.25353	ETV6	21	-2.16252	0.0356012	0.248034
UQCRC2	-0.214894	0.0850009	-2.13106	0.0383323	0.256679	-4.28792	UQCRC2	63	-2.16113	0.0357152	0.248562
KLF6	-0.530337	-0.0820314	-2.1991	0.0334154	0.239053	-4.08937	KLF6	1	-2.16833	0.0357251	0.248562
MAT2B	0.127966	0.139206	2.08533	0.042483	0.271515	-4.37546	MAT2B	112	2.16078	0.0357435	0.248562
IL9R	0.459626	-0.625606	2.237	0.0323565	0.233882	-3.94785	IL9R	2	2.18921	0.0357827	0.248672
LENG1	0.165809	-0.0631597	2.18307	0.034048	0.241818	-4.18649	LENG1	16	2.16004	0.0358038	0.248672
SCAMP1	0.175953	0.1418	2.15698	0.0361419	0.249295	-4.23763	SCAMP1	25	2.15969	0.0358325	0.248717
DUSP19	-0.448361	0.241818	-2.19353	0.0332397	0.238101	-4.16586	DUSP19	1	-2.15858	0.0359232	0.249132
CENPB	-0.182444	0.0697439	-2.17119	0.0349881	0.24432	-4.20985	CENPB	17	-2.15842	0.0359367	0.249132
KDM2B	-0.163666	0.169208	-2.12173	0.0391491	0.260281	-4.30591	KDM2B	58	-2.15761	0.0360035	0.24944
PPP4R2	0.114448	0.0644536	2.07544	0.0434314	0.274877	-4.3942	PPP4R2	94	2.15651	0.036094	0.249912
PACS1	-0.251776	0.312552	-2.1442	0.0372074	0.253236	-4.26248	PACS1	26	-2.1556	0.0361687	0.250275
EGFL7	-1.43239	-0.166491	-2.15795	0.0376587	0.25476	-4.1705	EGFL7	1	-2.17334	0.0362472	0.250663
SLC43A2	-1.00553	-0.287009	-2.14105	0.0374743	0.254526	-4.26859	SLC43A2	3	-2.15417	0.0362872	0.250785
RALGAPA2	0.297284	0.103404	2.13628	0.0378826	0.255502	-4.27785	RALGAPA2	35	2.15379	0.036318	0.250837
RBSN	-0.262682	0.0394876	-2.14892	0.0368107	0.251976	-4.25332	RBSN	18	-2.15353	0.0363395	0.250837
NELFCD	-0.118576	0.136236	-2.08434	0.0425778	0.27178	-4.37735	NELFCD	78	-2.15218	0.0364518	0.251457
TSPAN9	-0.953237	0.255734	-2.15937	0.0370146	0.252693	-4.16797	TSPAN9	1	-2.1644	0.0364745	0.251458
MON2	-0.12761	-0.00255355	-2.09916	0.0411881	0.267267	-4.34915	MON2	64	-2.15107	0.0365441	0.251765
PTPRJ	-0.374568	-0.128471	-2.13718	0.0378049	0.255285	-4.27609	PTPRJ	21	-2.15015	0.0366209	0.251765
AKR1B1	-0.284706	0.316668	-2.11805	0.0394757	0.261366	-4.31299	AKR1B1	144	-2.14939	0.0366845	0.251765
PACSIN3	-0.564657	0.513816	-2.13242	0.0382149	0.25635	-4.28531	PACSIN3	28	-2.14934	0.0366885	0.251765
TAF7	0.172323	0.101834	2.12116	0.0391996	0.260354	-4.30701	TAF7	48	2.14924	0.0366969	0.251765
UBE2Q1	-0.142595	-0.0198247	-2.12692	0.0386928	0.25857	-4.29591	UBE2Q1	39	-2.14914	0.0367051	0.251765
C2orf42	0.20449	0.129625	2.2132	0.0317644	0.231834	-4.12682	C2orf42	5	2.14884	0.03673	0.251765
CDC27	-0.126078	-0.085009	-2.09787	0.0413076	0.267329	-4.35161	CDC27	62	-2.14884	0.0367306	0.251765
PLVAP	1.01038	0.379728	2.15386	0.0376402	0.25476	-4.24394	PLVAP	1	2.16306	0.0367436	0.251765
GTDC1	0.353649	0.343588	2.18424	0.0339566	0.241705	-4.18418	GTDC1	2	2.14868	0.0367438	0.251765
GSDMD	-0.280682	-0.021534	-2.12437	0.0389163	0.259504	-4.30082	GSDMD	57	-2.14814	0.0367892	0.251922
LMO2	-0.512513	0.469099	-2.14028	0.0375399	0.254526	-4.27009	LMO2	6	-2.14751	0.0368418	0.252128
PPM1B	0.460082	0.000883209	2.15249	0.0365132	0.250491	-4.24638	PPM1B	3	2.14718	0.0368694	0.252162
SRBD1	-0.181151	-0.0200951	-2.10551	0.0406057	0.266216	-4.33703	SRBD1	83	-2.14639	0.0369356	0.252342
GLIPR1	-0.745627	-0.478048	-2.15829	0.0366543	0.251224	-4.16852	GLIPR1	1	-2.15353	0.0369407	0.252342
ZNF185	-0.814716	-0.961842	-2.13369	0.0381052	0.256037	-4.28285	ZNF185	4	-2.14571	0.0369927	0.252543
SMPD1	-0.43593	-0.0496123	-2.2657	0.0299325	0.224768	-3.88671	SMPD1	1	-2.16816	0.0370502	0.252654
RPS16	-0.140588	0.0439355	-2.07127	0.0438365	0.276591	-4.40207	RPS16	162	-2.14488	0.0370627	0.252654
SLC16A2	-0.566725	0.00488877	-2.17738	0.0352463	0.245431	-4.13325	SLC16A2	1	-2.15332	0.0370958	0.252654
WDFY2	-0.438383	-0.0790959	-2.13599	0.0379074	0.255502	-4.27841	WDFY2	10	-2.14445	0.0370993	0.252654
TBC1D22A	-0.131888	0.173316	-2.13258	0.0382014	0.25635	-4.285	TBC1D22A	33	-2.14418	0.0371221	0.252656
KANK3	0.717668	0.111204	2.13498	0.0379941	0.255502	-4.28036	KANK3	3	2.14345	0.0371838	0.252922
UBE2R2	0.162324	-0.144342	2.16547	0.0354481	0.245744	-4.22104	UBE2R2	16	2.14156	0.0373433	0.253853
CCDC85C	0.70166	-0.197163	2.12676	0.038707	0.25857	-4.29622	CCDC85C	11	2.14126	0.0373695	0.253877
UBXN11	-0.57297	0.283896	-2.31537	0.0298187	0.224768	-3.72958	UBXN11	1	-2.2017	0.0375846	0.255183
BZW2	0.244822	0.0366094	2.10371	0.0407704	0.266783	-4.34048	BZW2	121	2.13788	0.0376569	0.255519
EID1	0.359449	-0.266724	2.20125	0.0326534	0.235184	-4.15056	EID1	1	2.13749	0.0376905	0.255592
COX10	0.478266	-0.422162	2.17531	0.0352714	0.245431	-4.202	COX10	1	2.14348	0.0377866	0.256018
TCF25	-0.183364	0.00629036	-2.11142	0.0400693	0.263737	-4.32571	TCF25	45	-2.13622	0.037799	0.256018
TFDP1	-0.484407	-0.0262401	-2.12058	0.0392509	0.260431	-4.30813	TFDP1	22	-2.13575	0.03784	0.256141
DENND5B	0.467154	0.115015	2.13495	0.0379967	0.255502	-4.28042	DENND5B	4	2.13504	0.037901	0.256399
CDC37L1	0.211822	0.0299369	2.14454	0.0371794	0.2532	-4.26184	CDC37L1	14	2.13359	0.0380254	0.257085
SAR1A	0.125904	-0.0626503	2.06502	0.044449	0.277831	-4.41383	SAR1A	90	2.13193	0.0381689	0.257899
PRKRIP1	-0.14851	-0.0780258	-2.15466	0.0363328	0.250327	-4.24214	PRKRIP1	18	-2.13119	0.0382331	0.258135
FRK	-0.392037	0.0388507	-2.30536	0.0279792	0.218449	-3.81735	FRK	1	-2.16172	0.0382499	0.258135
FCHSD1	0.994195	-0.230544	2.11659	0.0396055	0.26207	-4.31579	FCHSD1	4	2.1305	0.0382925	0.258267
OTUD5	0.286142	-0.223986	2.12108	0.0392066	0.260354	-4.30716	OTUD5	20	2.12976	0.0383566	0.258426
SOAT1	-0.209879	-0.308921	-2.11066	0.040138	0.264034	-4.32717	SOAT1	38	-2.1297	0.0383623	0.258426
BCAR3	-0.897915	-0.154145	-2.12756	0.0391333	0.260281	-4.29459	BCAR3	1	-2.13325	0.0385315	0.25941
MRPL21	-0.222472	0.0297382	-2.1351	0.0379835	0.255502	-4.28012	MRPL21	14	-2.12708	0.0385908	0.259578
FBXL4	-0.262379	0.218581	-2.1405	0.0375211	0.254526	-4.26966	FBXL4	8	-2.12694	0.0386029	0.259578
RASSF8	-0.674496	-0.538961	-2.13876	0.0383	0.256617	-4.27266	RASSF8	1	-2.13342	0.0386509	0.259652
HGD	-1.66125	1.32796	-2.31264	0.0409	0.267007	-3.72789	HGD	1	-2.3239	0.0386602	0.259652
SPTBN2	0.766211	0.0234613	2.10662	0.0405044	0.265819	-4.33491	SPTBN2	112	2.12593	0.0386914	0.259698
STAT3	-0.242375	-0.331099	-2.0905	0.0419953	0.270063	-4.36565	STAT3	137	-2.12567	0.0387134	0.259698
CREBZF	0.247696	-0.0489122	2.16047	0.0358552	0.247646	-4.23082	CREBZF	5	2.125	0.0387729	0.259728
ATP10A	-0.403463	-0.00327269	-2.6853	0.015064	0.155588	-3.07902	ATP10A	1	-2.22042	0.0388174	0.259728
PRR3	0.269475	-0.106107	2.13988	0.0375742	0.254526	-4.27087	PRR3	7	2.1244	0.0388254	0.259728
SPRY2	0.522727	0.0223584	2.12359	0.038985	0.259807	-4.30233	SPRY2	3	2.12397	0.0388633	0.259728
RRP36	0.239917	-0.233141	2.11893	0.0393973	0.261156	-4.3113	RRP36	20	2.12381	0.0388774	0.259728
WFS1	-0.748032	-0.187272	-2.10796	0.040383	0.265334	-4.33235	WFS1	16	-2.12379	0.0388787	0.259728
ZNF319	0.153088	-0.04132	2.23125	0.0304618	0.226519	-4.09075	ZNF319	6	2.12377	0.0388803	0.259728
MCTP2	0.578392	0.151214	2.11263	0.0399604	0.263485	-4.32339	MCTP2	7	2.12327	0.0389249	0.259745
CLTA	0.228682	-0.0214712	2.08984	0.0420568	0.270303	-4.36689	CLTA	94	2.12314	0.038936	0.259745
CFAP20	0.148004	0.0396488	2.13349	0.038122	0.256037	-4.28323	CFAP20	22	2.12295	0.0389525	0.259745
SPAG7	0.173857	-0.0305292	2.09996	0.0411144	0.26716	-4.34762	SPAG7	41	2.1222	0.0390192	0.259969
DHX57	0.355967	-0.189273	2.10061	0.0410548	0.267113	-4.34639	DHX57	59	2.12204	0.0390326	0.259969
FAM107B	0.584809	0.357144	2.10328	0.0408097	0.266884	-4.3413	FAM107B	42	2.12143	0.0390864	0.26014
SLC4A10	0.758803	-0.149345	2.20438	0.0365121	0.250491	-3.92263	SLC4A10	1	2.16885	0.0391046	0.26014
ASIC1	-0.944656	-0.163713	-2.17347	0.0386506	0.258502	-3.97712	ASIC1	1	-2.16369	0.0392043	0.260625
MAEA	0.173777	0.0464365	2.08687	0.0423376	0.271439	-4.37255	MAEA	58	2.11961	0.0392482	0.260625
PIP4P2	-0.271859	-0.0674413	-2.15413	0.0363769	0.250477	-4.24318	PIP4P2	4	-2.11939	0.0392674	0.260625
C5orf24	0.178116	0.218231	2.15834	0.03603	0.2487	-4.23498	C5orf24	10	2.11911	0.0392919	0.260625
FANCA	-0.206217	-0.0176947	-2.11575	0.0396805	0.262411	-4.3174	FANCA	22	-2.11909	0.0392939	0.260625
CRYBG3	-0.87167	-0.83162	-2.10046	0.0410687	0.267113	-4.34668	CRYBG3	57	-2.1187	0.0393285	0.2607
UBR2	-0.155478	-0.0717361	-2.0652	0.0444312	0.277831	-4.41349	UBR2	101	-2.11765	0.0394217	0.261031
JAKMIP1	0.440389	-0.686284	2.10486	0.0406648	0.266403	-4.33827	JAKMIP1	17	2.11761	0.0394252	0.261031
EEA1	-0.232167	0.0572462	-2.0771	0.0432704	0.274168	-4.39105	EEA1	196	-2.11626	0.0395459	0.261193
HAUS4	-0.190763	-0.023173	-2.10819	0.0403614	0.265334	-4.3319	HAUS4	27	-2.11625	0.0395463	0.261193
CYB5R1	-0.368735	0.378518	-2.10049	0.0410663	0.267113	-4.34663	CYB5R1	29	-2.11622	0.0395498	0.261193
RNF4	0.221787	-0.0935265	2.19944	0.0327899	0.235784	-4.15415	RNF4	3	2.11619	0.039552	0.261193
OSBP2	0.791304	-0.329736	2.114	0.0398373	0.262828	-4.32076	OSBP2	1	2.11603	0.0395662	0.261193
GPN3	0.130881	-0.0375836	2.1662	0.0353889	0.245486	-4.21961	GPN3	15	2.11493	0.0396642	0.261537
CAP1	-0.206172	0.141945	-2.06546	0.044406	0.277831	-4.41301	CAP1	388	-2.11475	0.0396804	0.261537
URGCP	-0.280398	-0.196292	-2.10265	0.040867	0.266971	-4.34249	URGCP	25	-2.11466	0.0396885	0.261537
QRICH1	0.127534	0.0751373	2.06735	0.0442202	0.277516	-4.40946	QRICH1	60	2.11417	0.0397326	0.261648
CLCC1	-0.409894	0.220521	-2.09601	0.0414806	0.268139	-4.35517	CLCC1	38	-2.11396	0.0397519	0.261648
GNGT2	-0.436714	-0.772733	-2.12043	0.0392647	0.260431	-4.30842	GNGT2	3	-2.11345	0.0397972	0.261792
ATAD3B	-0.341503	-0.37103	-2.10441	0.040706	0.266517	-4.33913	ATAD3B	15	-2.11234	0.0398968	0.262293
CHSY1	0.216424	-0.050858	2.12598	0.0387754	0.258873	-4.29773	CHSY1	12	2.1118	0.0399453	0.262434
CLEC14A	-0.847064	0.0353107	-2.10042	0.0410723	0.267113	-4.34675	CLEC14A	3	-2.11158	0.0399651	0.262434
SEPHS2	-0.178199	-0.0825752	-2.14491	0.0371474	0.2532	-4.26111	SEPHS2	11	-2.11098	0.0400198	0.262639
C12orf73	0.233263	-0.157377	2.18283	0.034067	0.241818	-4.18697	C12orf73	3	2.1106	0.0400539	0.262708
EXOC6B	-0.434007	-0.505726	-2.09509	0.0415655	0.268533	-4.35691	EXOC6B	24	-2.11009	0.0400997	0.262855
CD69	1.04624	-0.597265	2.10076	0.0410407	0.267113	-4.3461	CD69	1	2.10954	0.0401494	0.263027
MILR1	-0.783368	0.303599	-2.09382	0.0416843	0.26881	-4.35933	MILR1	10	-2.1086	0.0402342	0.263391
DEF8	-0.954577	-0.726139	-2.10127	0.040994	0.267113	-4.34513	DEF8	1	-2.10827	0.0402644	0.263391
TBC1D14	0.535725	0.232714	2.09329	0.0417338	0.26881	-4.36034	TBC1D14	19	2.10813	0.0402775	0.263391
ANPEP	-0.988564	0.73709	-2.09409	0.0416591	0.26881	-4.35882	ANPEP	4	-2.10789	0.0402991	0.263391
JCAD	-0.957392	0.375424	-2.11115	0.0412034	0.267267	-4.32349	JCAD	1	-2.11908	0.0403572	0.263617
NIPAL2	0.833538	-0.406161	2.10968	0.0408706	0.266971	-4.32818	NIPAL2	1	2.11342	0.04042	0.263873
SEPTIN1	0.399316	-0.369141	2.08057	0.0429368	0.273137	-4.38448	SEPTIN1	118	2.10393	0.0406596	0.265262
ZBTB4	0.399709	0.0776485	2.12501	0.0388602	0.259284	-4.29959	ZBTB4	2	2.10363	0.0406869	0.265262
SH3BP1	-0.561055	-0.250052	-2.09414	0.0416544	0.26881	-4.35872	SH3BP1	6	-2.10331	0.040716	0.265262
WWP1	-0.299214	-0.364353	-2.13832	0.0377078	0.254937	-4.2739	WWP1	3	-2.10319	0.0407275	0.265262
SPATS2	-0.316601	0.0859386	-2.08182	0.0428171	0.272685	-4.38211	SPATS2	47	-2.10199	0.0408378	0.265825
GALM	0.6628	-0.301285	2.08614	0.042407	0.271515	-4.37394	GALM	15	2.10113	0.0409162	0.266181
PTGR1	-1.1798	0.24625	-2.08393	0.0426166	0.271872	-4.37812	PTGR1	6	-2.09955	0.0410615	0.266846
AIMP1	0.141213	-0.00834232	2.03835	0.0471507	0.284889	-4.46375	AIMP1	112	2.09951	0.041066	0.266846
CEP85L	0.311098	-0.784515	2.1003	0.0410833	0.267113	-4.34698	CEP85L	9	2.09854	0.041155	0.267052
DSE	-0.718712	-0.272905	-2.1299	0.0400652	0.263737	-4.14429	DSE	1	-2.11582	0.0411706	0.267052
UBR4	-0.0787979	0.0782984	-1.88712	0.0653145	0.337609	-4.73644	UBR4	494	-2.09823	0.0411838	0.267052
CCDC88B	0.423851	-0.468023	2.07758	0.0432241	0.274168	-4.39014	CCDC88B	61	2.09777	0.041226	0.267052
NETO2	-0.732323	-0.333492	-2.09799	0.0412966	0.267329	-4.35139	NETO2	1	-2.09769	0.0412335	0.267052
DVL1	-0.323814	0.0939391	-2.11547	0.0397057	0.262418	-4.31794	DVL1	4	-2.09756	0.0412459	0.267052
MYH10	0.450724	-0.094118	2.07246	0.0437202	0.276393	-4.39982	MYH10	832	2.09711	0.0412875	0.267052
HSPD1	0.206329	0.0220643	2.0452	0.0464433	0.282818	-4.45098	HSPD1	1374	2.0971	0.0412886	0.267052
RNGTT	-0.245783	0.0112839	-2.07087	0.0438752	0.276591	-4.40282	RNGTT	62	-2.09656	0.0413382	0.267101
ARFGAP3	0.260117	-0.150424	2.07031	0.0439297	0.276624	-4.40387	ARFGAP3	70	2.0965	0.0413438	0.267101
SRPK1	0.239871	-0.157911	2.06602	0.0443503	0.27771	-4.41195	SRPK1	86	2.0962	0.0413719	0.267128
DELE1	0.296409	-0.043757	2.21036	0.032438	0.234005	-4.13353	DELE1	1	2.09938	0.0415673	0.268235
MOCS2	-0.511155	-0.556862	-2.07904	0.0430837	0.273451	-4.38738	MOCS2	18	-2.09328	0.0416441	0.268576
UBL7	-0.14683	-0.0408581	-2.10544	0.0406124	0.266216	-4.33717	UBL7	21	-2.09262	0.0417057	0.268818
HOMER3	0.724322	0.273497	2.07732	0.0432494	0.274168	-4.39064	HOMER3	12	2.09205	0.0417584	0.268855
ZNF544	0.388835	-0.0190629	2.11504	0.0397448	0.262418	-4.31878	ZNF544	2	2.09198	0.0417653	0.268855
PLA2G15	0.401313	0.170054	2.08845	0.0421882	0.270771	-4.36954	PLA2G15	7	2.09179	0.0417835	0.268855
KATNA1	0.19019	-0.105955	2.06972	0.0439873	0.276646	-4.40498	KATNA1	42	2.09145	0.0418152	0.268904
NKTR	-0.111309	0.0424232	-2.0445	0.0465151	0.282818	-4.45228	NKTR	53	-2.09086	0.0418699	0.269102
RASGRP3	0.715397	0.168658	2.33973	0.031677	0.231499	-3.61213	RASGRP3	1	2.19098	0.0419316	0.269344
RASSF5	-0.284521	-0.0751934	-2.08106	0.0428906	0.272998	-4.38356	RASSF5	20	-2.08981	0.0419689	0.269429
GIPC3	-0.884424	-0.425341	-2.0876	0.042643	0.271885	-4.36938	GIPC3	1	-2.09317	0.0420145	0.269567
SNRPA	0.0875801	0.0425849	1.98325	0.0531859	0.304454	-4.56515	SNRPA	85	2.0889	0.0420546	0.269597
RASA3	-0.407939	-0.195085	-2.06926	0.0440321	0.276646	-4.40585	RASA3	52	-2.08876	0.0420673	0.269597
RNF34	0.142055	-0.124568	2.13782	0.0377503	0.255071	-4.27486	RNF34	13	2.088	0.0421389	0.269748
SLC12A5	-0.574822	0.215215	-2.14347	0.0397518	0.262418	-4.20201	SLC12A5	1	-2.11435	0.0421492	0.269748
RASSF10	-1.76451	-0.0958447	-2.18795	0.0447983	0.279266	-3.88211	RASSF10	1	-2.20948	0.0421633	0.269748
PIK3CG	-0.331082	0.180159	-2.06331	0.044618	0.278297	-4.41705	PIK3CG	79	-2.08681	0.0422521	0.269983
MAPK7	-0.226849	-0.0660284	-2.08561	0.0424571	0.271515	-4.37494	MAPK7	18	-2.08669	0.042263	0.269983
PDP2	0.321991	-0.178863	2.08669	0.0423548	0.271439	-4.37289	PDP2	9	2.08644	0.0422871	0.269983
ENOSF1	-0.565699	-0.583475	-2.07299	0.0436683	0.276221	-4.39881	ENOSF1	13	-2.08634	0.0422964	0.269983
IPO11	0.157224	-0.0408057	2.04473	0.0464914	0.282818	-4.45185	IPO11	71	2.08578	0.0423494	0.270167
CNOT11	0.105488	0.083483	2.10705	0.0404652	0.265718	-4.33408	CNOT11	25	2.08548	0.0423781	0.270196
KANK1	-1.10866	0.37656	-2.06987	0.0439729	0.276646	-4.40471	KANK1	4	-2.08434	0.0424854	0.270726
PC	0.333791	0.141901	2.05972	0.0449752	0.279989	-4.4238	PC	87	2.08362	0.0425539	0.271008
NABP1	-0.755547	-0.272034	-2.09723	0.0424878	0.271515	-4.28553	NABP1	1	-2.09408	0.0426518	0.271324
SRGAP2	-0.371855	0.239975	-2.06413	0.0445375	0.27795	-4.41552	SRGAP2	42	-2.0826	0.0426518	0.271324
ABCC5	0.330628	-0.182397	2.0706	0.0439011	0.276599	-4.40332	ABCC5	21	2.08218	0.0426915	0.271422
MAPK3	-0.219982	0.0402574	-2.0577	0.0451772	0.280534	-4.42759	MAPK3	50	-2.08145	0.0427608	0.271708
SLC25A29	0.227277	0.0701193	2.09314	0.0417479	0.26881	-4.36063	SLC25A29	11	2.0806	0.0428429	0.272075
ALG13	-0.196221	-0.0537682	-2.08016	0.0429762	0.273232	-4.38526	ALG13	19	-2.07774	0.0431174	0.273663
PTPRC	-0.551619	-0.726846	-2.05614	0.0453331	0.280731	-4.43051	PTPRC	208	-2.07717	0.0431715	0.273768
AJM1	1.83453	-1.56903	2.15363	0.045821	0.281707	-3.92344	AJM1	1	2.17617	0.0431828	0.273768
VAV2	-0.706996	0.104197	-2.05933	0.0450143	0.279989	-4.42454	VAV2	24	-2.0757	0.0433138	0.274437
MT-CO2	-0.34511	0.0429994	-2.05377	0.0455719	0.281115	-4.43496	MT-CO2	60	-2.0749	0.0433908	0.274437
NDUFV1	-0.278999	0.178958	-2.05045	0.0459081	0.281707	-4.44118	NDUFV1	68	-2.07482	0.0433984	0.274437
NMNAT3	0.704656	-0.529677	2.07584	0.0433924	0.274786	-4.39344	NMNAT3	1	2.07454	0.043426	0.274437
CCDC34	0.579613	-0.397823	2.08479	0.0425346	0.271658	-4.37649	CCDC34	1	2.07443	0.0434367	0.274437
VAV3	-0.513008	0.0071849	-2.05469	0.0454788	0.280731	-4.43323	VAV3	73	-2.07428	0.0434514	0.274437
FAM122B	-0.166177	0.0480863	-2.09642	0.0414418	0.268043	-4.35437	FAM122B	15	-2.07419	0.0434598	0.274437
AMH	-0.921192	0.370899	-2.40489	0.0347342	0.243204	-3.58689	AMH	1	-2.25818	0.0435268	0.274491
BDH1	0.372752	0.231688	2.05464	0.0454842	0.280731	-4.43333	BDH1	43	2.07317	0.0435586	0.274491
RNF19A	-0.251614	-0.156785	-2.21644	0.0315273	0.231311	-4.12037	RNF19A	1	-2.07313	0.0435624	0.274491
BLM	0.280535	-0.0668137	2.04441	0.0465242	0.282818	-4.45245	BLM	121	2.07309	0.0435665	0.274491
NDUFS1	-0.240894	0.0930218	-2.03722	0.0472687	0.285112	-4.46586	NDUFS1	177	-2.07267	0.0436071	0.274592
TRMT1L	-0.228084	0.117011	-2.04387	0.0465805	0.282818	-4.45347	TRMT1L	71	-2.07226	0.0436468	0.274624
PLAGL2	0.260748	0.0145004	2.0922	0.0418359	0.269192	-4.36242	PLAGL2	6	2.0717	0.0437014	0.274624
TSC22D3	-0.539013	0.330386	-2.06935	0.044024	0.276646	-4.40569	TSC22D3	3	-2.07151	0.0437203	0.274624
TRIM26	-0.177027	-0.0364329	-2.04607	0.0463549	0.282674	-4.44937	TRIM26	47	-2.07139	0.0437322	0.274624
CNOT10	0.110084	0.0990266	2.00922	0.0502628	0.294938	-4.51765	CNOT10	69	2.07136	0.0437348	0.274624
KDM4A	-0.189775	0.0868495	-2.05157	0.0457948	0.281707	-4.43909	KDM4A	39	-2.071	0.0437695	0.274688
ZMYND8	-0.139549	0.298332	-2.0141	0.0497297	0.292577	-4.50867	ZMYND8	98	-2.07074	0.0437953	0.274696
PAK4	0.209911	-0.0817588	2.06778	0.0441771	0.277402	-4.40863	PAK4	19	2.06804	0.0440593	0.276166
SLTM	0.147147	0.118639	2.00307	0.0509421	0.297202	-4.52894	SLTM	179	2.06784	0.0440791	0.276166
LGMN	-0.554913	-0.290042	-2.05103	0.0458494	0.281707	-4.44009	LGMN	18	-2.06562	0.0442968	0.277231
ADK	0.255342	0.149954	2.03302	0.047708	0.286248	-4.47367	ADK	158	2.06561	0.0442985	0.277231
DHRS7B	0.356385	-0.259597	2.05652	0.0452955	0.280731	-4.42981	DHRS7B	14	2.06465	0.0443927	0.277665
DFFB	0.222046	0.140906	2.07985	0.0430066	0.27327	-4.38586	DFFB	10	2.06377	0.0444803	0.278058
SEC24D	0.2134	-0.186213	2.03408	0.0475958	0.286035	-4.47169	SEC24D	64	2.06215	0.0446403	0.27859
ZER1	0.202192	0.0219782	2.06474	0.0444769	0.277831	-4.41436	ZER1	18	2.06206	0.0446489	0.27859
QDPR	0.376355	0.115749	2.0491	0.0460448	0.281707	-4.44369	QDPR	21	2.06196	0.0446588	0.27859
ILK	-0.241234	0.00483142	-2.03603	0.0473927	0.2853	-4.46807	ILK	64	-2.06173	0.0446817	0.27859
CA13	-1.10077	0.559438	-2.12885	0.0452055	0.280555	-4.06833	CA13	1	-2.12961	0.0446899	0.27859
RTKN2	0.716892	0.0309498	2.05023	0.0459301	0.281707	-4.44158	RTKN2	4	2.0607	0.0447847	0.27901
KANSL3	0.11569	-0.00278793	2.02316	0.0487518	0.289572	-4.49193	KANSL3	48	2.06005	0.0448492	0.27901
RAP1GDS1	-0.216487	-0.427918	-2.02136	0.0489454	0.289943	-4.49527	RAP1GDS1	158	-2.05964	0.0448899	0.27901
CNGA1	-0.448112	-0.0159474	-2.54378	0.0192854	0.176901	-3.22129	CNGA1	1	-2.13356	0.0448942	0.27901
AIMP2	0.16676	0.0651537	2.02991	0.0480353	0.287442	-4.47944	AIMP2	53	2.05954	0.0449001	0.27901
FOXO1	-0.539874	0.353329	-2.0468	0.0462794	0.282519	-4.44799	FOXO1	11	-2.05892	0.0449616	0.27901
GCSAM	-0.390589	0.0121372	-2.04847	0.0461091	0.281789	-4.44487	GCSAM	15	-2.0588	0.044974	0.27901
ASPH	-0.716375	0.00331301	-2.0412	0.0468559	0.283874	-4.45845	ASPH	45	-2.05877	0.0449772	0.27901
PPDPF	-0.394238	0.329175	-2.07904	0.0430839	0.273451	-4.38738	PPDPF	2	-2.05872	0.0449816	0.27901
MED13	0.117552	-0.0102227	2.04957	0.0459976	0.281707	-4.44282	MED13	32	2.0573	0.0451238	0.279412
ZNF346	0.148032	0.154684	2.0711	0.0438526	0.276591	-4.40238	ZNF346	20	2.05721	0.0451327	0.279412
MSANTD4	0.236062	-0.154569	2.06457	0.0444936	0.277831	-4.41468	MSANTD4	12	2.05714	0.0451397	0.279412
AHCYL2	-0.221922	0.0333509	-2.05464	0.0454846	0.280731	-4.43334	AHCYL2	19	-2.05685	0.0451683	0.279412
IL7R	-0.542129	0.312762	-2.04699	0.04626	0.282519	-4.44763	IL7R	7	-2.05683	0.0451712	0.279412
SHANK3	-1.29977	0.00148006	-2.04949	0.0465301	0.282818	-4.37414	SHANK3	1	-2.06136	0.0452212	0.279567
LMBRD1	0.416612	-0.177022	2.05516	0.0454321	0.280731	-4.43236	LMBRD1	5	2.05569	0.0452849	0.279807
GCFC2	-0.324465	-0.00575447	-2.03636	0.0473581	0.2853	-4.46746	GCFC2	44	-2.0553	0.0453249	0.279899
TRBC1	-0.476653	-0.0393413	-2.10807	0.0426776	0.271951	-4.08912	TRBC1	3	-2.07772	0.0453792	0.28008
SLIT2	1.10254	-0.731579	2.04836	0.0466462	0.282909	-4.44404	SLIT2	1	2.05894	0.0454635	0.280227
ORC6	0.344755	-0.280221	2.03981	0.0469995	0.284282	-4.46104	ORC6	26	2.0539	0.0454651	0.280227
NMT1	-0.13188	0.0183011	-2.00586	0.0506331	0.296334	-4.52382	NMT1	69	-2.05377	0.0454781	0.280227
PRICKLE1	0.639294	0.219554	2.07491	0.0456081	0.281144	-4.32465	PRICKLE1	2	2.07409	0.0455128	0.280287
SOBP	0.720802	-0.934843	2.04656	0.0463042	0.282519	-4.44844	SOBP	2	2.05277	0.0455796	0.280544
ALCAM	0.508426	-0.0970754	2.03411	0.0475933	0.286035	-4.47164	ALCAM	39	2.0515	0.0457076	0.28107
USE1	-0.122939	0.0326097	-2.04042	0.0469357	0.284179	-4.45989	USE1	33	-2.0512	0.0457379	0.28107
AC093012.1	0.262361	0.0800782	2.03055	0.0479674	0.287368	-4.47825	AC093012.1	46	2.05095	0.0457634	0.28107
SH3PXD2A	-0.594736	0.29124	-2.03702	0.0472895	0.285112	-4.46623	SH3PXD2A	14	-2.05093	0.0457655	0.28107
MRPL19	-0.218537	0.0420905	-2.03244	0.0477688	0.286459	-4.47475	MRPL19	37	-2.05002	0.0458575	0.281481
PLAUR	-0.570907	0.306804	-2.0392	0.0470627	0.284511	-4.46217	PLAUR	7	-2.04976	0.0458841	0.281489
GSN	-0.635488	0.563216	-2.03046	0.0479769	0.287368	-4.47842	GSN	86	-2.04924	0.0459368	0.281658
TLR10	0.685623	-0.211373	2.0577	0.0458457	0.281707	-4.42593	TLR10	1	2.05506	0.045994	0.281742
CCDC47	-0.160953	-0.0328278	-2.01149	0.0500145	0.294098	-4.51348	CCDC47	67	-2.04845	0.0460178	0.281742
XPO7	0.181146	0.0178758	2.00383	0.050858	0.297202	-4.52755	XPO7	134	2.04836	0.0460266	0.281742
SOS1	0.13962	0.0547614	2.02592	0.0484581	0.288584	-4.48684	SOS1	40	2.04812	0.046051	0.281742
UHRF1BP1	0.236266	-0.110667	2.02712	0.0483308	0.288285	-4.48462	UHRF1BP1	44	2.04755	0.0461096	0.281946
HSBP1	0.224728	-0.229148	2.03378	0.0476275	0.286071	-4.47225	HSBP1	29	2.04619	0.0462486	0.282642
SNRPD2	0.086646	0.0540537	1.91016	0.0622119	0.32988	-4.69606	SNRPD2	153	2.04544	0.0463254	0.282957
CCDC51	0.274618	0.114702	2.02759	0.0482804	0.288158	-4.48374	CCDC51	37	2.04495	0.0463754	0.283107
THUMPD3	0.185034	-0.167605	2.02073	0.0490123	0.290186	-4.49643	THUMPD3	46	2.04434	0.0464374	0.283331
ALDH1B1	0.491524	-0.0822468	2.02603	0.0484463	0.288584	-4.48663	ALDH1B1	46	2.044	0.0464729	0.283394
SLC3A2	-0.383487	-0.228657	-2.01955	0.0491393	0.29063	-4.49861	SLC3A2	188	-2.04367	0.0465071	0.283439
SNAP23	-0.209138	0.0487483	-2.01122	0.0500437	0.294115	-4.51397	SNAP23	84	-2.04338	0.0465364	0.283439
IGFBP7	0.771391	0.0727214	2.03319	0.0476894	0.286248	-4.47334	IGFBP7	3	2.04319	0.0465564	0.283439
FGFRL1	0.652991	-0.0315701	2.07864	0.0454761	0.280731	-4.31969	FGFRL1	1	2.06505	0.0466331	0.283607
ANKS1A	-0.180574	0.152721	-2.01457	0.0496785	0.292429	-4.5078	ANKS1A	54	-2.04243	0.0466346	0.283607
SNRNP48	0.172167	-0.0547692	2.04022	0.0469571	0.284179	-4.46028	SNRNP48	23	2.04056	0.0468274	0.284625
OAS3	-0.61687	-0.598412	-2.02159	0.0489209	0.289943	-4.49485	OAS3	50	-2.03935	0.0469523	0.28523
MRPL44	-0.210624	0.0195665	-2.01707	0.0494079	0.291449	-4.5032	MRPL44	43	-2.03777	0.0471168	0.286074
TNIP1	-0.292969	-0.046241	-2.01605	0.0495178	0.291834	-4.50507	TNIP1	48	-2.03602	0.0472983	0.286921
GPR180	0.269532	0.302421	2.09894	0.0412088	0.267267	-4.34958	GPR180	2	2.03593	0.0473077	0.286921
DOCK4	-0.554197	0.0442778	-2.02549	0.0485033	0.288699	-4.48762	DOCK4	7	-2.03568	0.0473343	0.286927
ZNF516	0.576099	0.238249	2.02192	0.0488851	0.289893	-4.49423	ZNF516	10	2.03424	0.0474851	0.287686
NEK8	-0.515233	0.352545	-2.06823	0.044949	0.279989	-4.33856	NEK8	1	-2.04141	0.0475402	0.287864
C2orf76	0.230684	-0.0197377	2.05598	0.0453498	0.280731	-4.43082	C2orf76	7	2.03299	0.0476156	0.288165
RBM28	-0.240648	-0.00523585	-2.00305	0.0509452	0.297202	-4.52899	RBM28	91	-2.03205	0.0477146	0.288608
FAM171A1	0.488245	-0.0355214	2.03785	0.0472027	0.285049	-4.46468	FAM171A1	2	2.03154	0.0477683	0.28867
ARID5A	0.485281	0.0744158	2.02237	0.0488367	0.289759	-4.4934	ARID5A	8	2.03146	0.0477765	0.28867
TULP3	-0.250426	-0.0710365	-2.04328	0.0466408	0.282909	-4.45457	TULP3	8	-2.03032	0.0478964	0.289238
SNX13	0.200369	-0.018081	2.02862	0.0481718	0.28795	-4.48184	SNX13	20	2.02944	0.0479896	0.2893
TTC21B	0.295998	-0.351821	2.01912	0.0491856	0.290751	-4.4994	TTC21B	21	2.02936	0.047998	0.2893
APOA4	0.694637	-0.12663	2.22423	0.0383818	0.256858	-3.79758	APOA4	1	2.10709	0.0479984	0.2893
SCO1	0.177438	0.0875314	2.03488	0.0475123	0.28584	-4.4702	SCO1	19	2.02925	0.0480099	0.2893
ALAD	-0.315679	0.14349	-2.01032	0.0501425	0.294541	-4.51563	ALAD	40	-2.0282	0.0481204	0.289809
DHX58	-0.223038	-0.600802	-2.04484	0.0464803	0.282818	-4.45165	DHX58	9	-2.02758	0.0481865	0.289988
MTG2	-0.208326	-0.191616	-2.03598	0.0473971	0.2853	-4.46815	MTG2	14	-2.02743	0.0482018	0.289988
HPS1	0.316641	0.184414	2.02308	0.0487607	0.289572	-4.49209	HPS1	12	2.02702	0.0482462	0.290099
PJA2	0.203075	-0.173289	2.00593	0.0506261	0.296334	-4.52371	PJA2	40	2.02515	0.048444	0.291132
BPIFA3	0.787061	-0.202248	2.11353	0.0442674	0.27763	-3.96067	BPIFA3	1	2.06553	0.0486304	0.292012
KIN	0.15107	-0.0483669	2.00028	0.0512539	0.298408	-4.53407	KIN	42	2.02329	0.0486426	0.292012
ITFG1	0.177696	0.00337175	2.06604	0.0443488	0.27771	-4.41192	ITFG1	8	2.02289	0.0486852	0.292111
RFX3	0.303356	0.102825	2.02048	0.0490398	0.290195	-4.4969	RFX3	11	2.02209	0.0487714	0.292371
RBM12	0.0641286	0.051466	1.80414	0.0776051	0.367687	-4.87842	RBM12	166	2.02194	0.0487875	0.292371
AC087632.2	-0.366564	-0.0406472	-2.49919	0.0212204	0.18596	-3.40729	AC087632.2	1	-2.09201	0.0488281	0.292371
MT-CO3	-0.361807	-0.102051	-2.07208	0.0437569	0.276416	-4.40053	MT-CO3	1	-2.02131	0.0488555	0.292371
ZSWIM6	-0.326006	0.338082	-2.17979	0.0364878	0.250491	-4.13124	ZSWIM6	1	-2.04312	0.048877	0.292371
ASAH1	0.541341	0.331657	2.00285	0.0509672	0.297202	-4.52936	ASAH1	55	2.02092	0.0488973	0.292371
GRK6	-0.221786	0.04997	-2.00373	0.0508695	0.297202	-4.52774	GRK6	36	-2.02049	0.0489427	0.292371
SWT1	-0.220782	0.0266768	-2.32455	0.0253796	0.206462	-3.84264	SWT1	1	-2.03083	0.0489725	0.292371
UPF3A	0.231899	0.102551	2.00814	0.0503823	0.29533	-4.51965	UPF3A	28	2.02008	0.0489875	0.292371
UCKL1	-0.118802	-0.0368085	-1.98557	0.0529195	0.303879	-4.56094	UCKL1	48	-2.02006	0.0489897	0.292371
CAMK2B	-0.343631	0.00778769	-2.04885	0.0460706	0.281707	-4.44416	CAMK2B	2	-2.01882	0.0491231	0.293011
PPP1R3D	0.315427	0.00812737	2.02756	0.0482837	0.288158	-4.48379	PPP1R3D	5	2.0168	0.0493411	0.294155
MORC4	-0.178561	0.0978908	-2.08857	0.0421765	0.270771	-4.36931	MORC4	5	-2.01553	0.0494783	0.294692
COX6C	-0.287192	-0.0472247	-1.99634	0.0516949	0.299884	-4.54128	COX6C	44	-2.01531	0.0495021	0.294692
USP44	0.686574	-1.23969	2.09073	0.0460605	0.281707	-4.12712	USP44	1	2.05314	0.0495426	0.294692
ASMTL	-0.350615	-0.0769208	-1.99154	0.0522378	0.301976	-4.55005	ASMTL	104	-2.01446	0.0495944	0.294692
RBM38	-0.301347	0.123289	-2.05865	0.0450816	0.280096	-4.4258	RBM38	2	-2.01428	0.0496141	0.294692
CAMK1D	-0.368216	0.106669	-1.99914	0.051381	0.298829	-4.53616	CAMK1D	29	-2.01428	0.0496144	0.294692
IFI16	-0.363768	0.231608	-1.98878	0.0525517	0.303127	-4.55508	IFI16	320	-2.0142	0.049623	0.294692
PPP5C	-0.110909	0.135419	-1.92422	0.0603802	0.324134	-4.6712	PPP5C	162	-2.01397	0.0496483	0.294692
DIS3	0.127601	0.0163848	1.93806	0.058623	0.319322	-4.64658	DIS3	187	2.01351	0.0496981	0.294692
PAXBP1	0.114719	0.105916	1.9497	0.0571785	0.316005	-4.62576	PAXBP1	84	2.01342	0.0497082	0.294692
SLC37A4	0.393551	0.189517	2.00542	0.0506822	0.296467	-4.52464	SLC37A4	11	2.0133	0.0497206	0.294692
ABI1	0.228704	0.26769	1.98747	0.0527021	0.30379	-4.55748	ABI1	61	2.01241	0.0498175	0.295109
AKT1S1	-0.17097	-0.0609307	-2.09309	0.0417525	0.26881	-4.36072	AKT1S1	5	-2.01182	0.0498825	0.295313
RBFA	0.202245	0.121117	2.02909	0.0481212	0.287802	-4.48095	RBFA	11	2.01162	0.0499046	0.295313
PNKD	-0.17129	-0.103136	-2.01598	0.0495253	0.291834	-4.5052	PNKD	20	-2.01123	0.0499472	0.295409
GOLGA7	-0.123948	-0.0177725	-2.02507	0.0485483	0.288813	-4.48841	GOLGA7	23	-2.01073	0.0500019	0.295576
GC	-0.634071	0.117989	-2.00037	0.0512438	0.298408	-4.53391	GC	5	-2.01047	0.0500302	0.295588
USP15	-0.164331	-0.136356	-1.9612	0.0557827	0.311675	-4.60509	USP15	136	-2.00956	0.0501299	0.295879
WASHC4	-0.155677	0.244001	-1.96071	0.0558405	0.311815	-4.60596	WASHC4	114	-2.00953	0.0501325	0.295879
ATF4	0.364757	-0.0358311	2.01459	0.0496765	0.292429	-4.50777	ATF4	4	2.00705	0.0504053	0.297333
PSTK	0.337375	-0.115112	2.06666	0.0442879	0.27763	-4.41076	PSTK	1	2.00675	0.0504383	0.297371
IER5	-0.52585	0.10197	-2.03445	0.0482363	0.288158	-4.4014	IER5	1	-2.01196	0.0505316	0.297764
KDM1B	0.171547	0.165132	1.99609	0.0517236	0.299895	-4.54174	KDM1B	29	2.00527	0.050602	0.297871
MRPL50	-0.186385	0.00631237	-1.98944	0.0524768	0.303007	-4.55389	MRPL50	35	-2.00526	0.0506029	0.297871
ZC3H12D	-0.505028	0.533261	-1.98909	0.0525169	0.303082	-4.55453	ZC3H12D	25	-2.00432	0.0507071	0.298066
HIPK3	-0.297953	0.267086	-2.04924	0.0460314	0.281707	-4.44344	HIPK3	2	-2.00427	0.0507129	0.298066
TGFB1I1	-0.891168	-0.391041	-1.99796	0.0515132	0.299159	-4.53832	TGFB1I1	1	-2.00424	0.050716	0.298066
AFF2	-1.06533	-0.492482	-1.99181	0.0522074	0.301976	-4.54956	AFF2	2	-2.00389	0.0507554	0.298142
NXN	-0.917865	0.00665726	-1.98564	0.0529119	0.303879	-4.56082	NXN	25	-2.00188	0.0509787	0.299262
RREB1	-0.202076	0.214258	-1.97545	0.054093	0.307893	-4.57933	RREB1	58	-2.00155	0.0510153	0.299262
ZEB1	0.487101	-0.548435	1.98502	0.052983	0.304048	-4.56194	ZEB1	34	2.00145	0.0510263	0.299262
SYNRG	0.15696	-0.079518	1.95479	0.0565572	0.313935	-4.61663	SYNRG	104	2.00092	0.0510847	0.299335
LIME1	0.458115	-1.06948	1.99905	0.0513913	0.298829	-4.53632	LIME1	4	2.00059	0.0511221	0.299335
YIF1A	-0.236409	-0.0139173	-2.14823	0.0368688	0.25205	-4.25467	YIF1A	1	-2.0004	0.0511435	0.299335
STARD3	-0.322237	0.120579	-1.99293	0.0520797	0.301648	-4.54751	STARD3	15	-2.00038	0.0511457	0.299335
YARS1	0.180178	0.0472707	1.94681	0.057534	0.316692	-4.63093	YARS1	472	1.99939	0.0512556	0.299821
POGLUT2	0.624068	-0.807997	1.98551	0.0529263	0.303879	-4.56105	POGLUT2	11	1.99872	0.0513311	0.300106
MNT	0.168786	0.161118	2.03027	0.0479973	0.287368	-4.47878	MNT	11	1.9982	0.0513887	0.300286
THAP6	0.401226	-0.136245	2.0767	0.0450048	0.279989	-4.32455	THAP6	1	2.01161	0.0516068	0.30137
RASAL2	-0.876149	-0.349761	-1.99905	0.0522444	0.301976	-4.46694	RASAL2	1	-2.00342	0.051628	0.30137
TAP2	-0.758768	-0.206729	-1.98449	0.0530437	0.304085	-4.56291	TAP2	4	-1.99569	0.0516718	0.30137
SORBS3	-0.467137	-0.0953415	-1.98004	0.0535572	0.306088	-4.57099	SORBS3	27	-1.99534	0.0517103	0.30137
PKN3	-0.530407	0.135799	-1.98327	0.0531842	0.304454	-4.56512	PKN3	11	-1.99514	0.0517327	0.30137
WIPF2	-0.234489	0.0552628	-2.03751	0.0472384	0.285111	-4.46532	WIPF2	4	-1.99496	0.0517533	0.30137
BRAF	-0.238053	-0.0027954	-1.98699	0.0527568	0.30384	-4.55835	BRAF	22	-1.99468	0.0517854	0.30137
DCAF17	0.291302	0.040377	2.04172	0.046802	0.283701	-4.45748	DCAF17	2	1.99464	0.0517896	0.30137
EEF1AKMT2	-0.280862	-0.06729	-2.01804	0.0493031	0.291247	-4.50141	EEF1AKMT2	4	-1.99402	0.0518591	0.301459
EFCAB14	0.235422	-0.206779	1.99769	0.0515433	0.299159	-4.53881	EFCAB14	13	1.99368	0.0518982	0.301459
ZYG11B	-0.177819	0.186057	-1.98571	0.0529032	0.303879	-4.56068	ZYG11B	27	-1.99311	0.051962	0.301459
HSPA13	-0.201039	-0.162919	-1.97705	0.053906	0.307297	-4.57643	HSPA13	35	-1.99291	0.0519856	0.301459
TPBG	0.848719	-0.288721	1.9908	0.0527209	0.30379	-4.54881	TPBG	1	1.99626	0.0519908	0.301459
TAF1A	-0.227873	0.0178869	-2.05506	0.0454418	0.280731	-4.43254	TAF1A	3	-1.99279	0.051999	0.301459
DAPP1	0.567912	-0.150835	1.98151	0.0533868	0.305426	-4.56831	DAPP1	8	1.99273	0.0520058	0.301459
GSDME	-1.02392	-0.990555	-1.97716	0.0538926	0.307297	-4.57622	GSDME	12	-1.9926	0.0520202	0.301459
MPP7	-0.941304	0.161771	-1.97656	0.0539631	0.307466	-4.57732	MPP7	12	-1.99178	0.0521135	0.301719
WDR44	-0.24905	0.0614033	-1.96339	0.0555199	0.311572	-4.60114	WDR44	103	-1.99161	0.0521328	0.301719
WDR60	-0.242342	0.0964305	-1.97785	0.0538122	0.307075	-4.57497	WDR60	30	-1.99135	0.0521621	0.301719
CD93	-0.79165	-0.243593	-1.97962	0.0536068	0.306215	-4.57176	CD93	4	-1.99125	0.0521729	0.301719
HLTF	0.292829	-0.0692586	1.9649	0.0553396	0.311572	-4.59842	HLTF	117	1.99059	0.0522486	0.301944
IRAK1BP1	0.529539	-0.0363576	2.30298	0.0326854	0.235184	-3.66228	IRAK1BP1	1	2.06435	0.0522657	0.301944
TRAK2	0.317324	0.0246646	1.99891	0.0514063	0.298829	-4.53657	TRAK2	5	1.98937	0.0523873	0.30249
ASXL1	-0.16013	-0.113434	-2.00329	0.0509182	0.297202	-4.52855	ASXL1	17	-1.98857	0.0524781	0.302801
ZKSCAN7	1.26507	-0.512268	3.58841	0.0151861	0.155876	-2.66042	ZKSCAN7	1	2.42063	0.0525106	0.302801
MIA3	-0.211211	0.0628478	-1.94933	0.0572245	0.316005	-4.62643	MIA3	218	-1.98813	0.0525292	0.302801
PTPN6	-0.583846	-0.179991	-1.96863	0.0548955	0.310723	-4.59167	PTPN6	175	-1.98795	0.0525493	0.302801
PCSK7	0.351942	-0.164674	2.32055	0.0287246	0.220879	-3.71273	PCSK7	1	2.03136	0.0525982	0.302851
NDUFA11	-0.359946	0.254917	-2.00103	0.0511698	0.298228	-4.53269	NDUFA11	3	-1.98734	0.0526194	0.302851
CBX1	0.533124	-0.344463	1.9694	0.0548042	0.310427	-4.59028	CBX1	55	1.98716	0.0526392	0.302851
NDUFA4L2	0.481952	0.0745334	2.08564	0.0458868	0.281707	-4.23047	NDUFA4L2	1	2.01768	0.052678	0.302919
MATR3	0.0951069	0.0543004	1.84546	0.071262	0.35163	-4.80842	MATR3	728	1.98535	0.0528472	0.303735
GAS2	0.281231	-0.428282	2.04084	0.0484289	0.288584	-4.38876	GAS2	4	1.99797	0.0529335	0.303872
HK1	0.411375	-0.24403	1.96221	0.0556604	0.311582	-4.60326	HK1	194	1.98445	0.0529505	0.303872
HTRA3	-1.09858	-0.12313	-1.9702	0.0547103	0.310404	-4.58884	HTRA3	4	-1.98419	0.0529804	0.303872
C15orf61	0.305655	-0.0456773	2.05866	0.0450809	0.280096	-4.42579	C15orf61	1	1.98396	0.0530065	0.303872
RAB5IF	-0.217342	-0.0924152	-2.0235	0.048716	0.289572	-4.49131	RAB5IF	5	-1.98356	0.0530524	0.303872
NFE2	-0.579546	-0.144887	-2.20042	0.0390478	0.259917	-3.82704	NFE2	1	-2.04481	0.0530765	0.303872
SSNA1	-0.315606	-0.468621	-1.979	0.0536782	0.306467	-4.57288	SSNA1	12	-1.98332	0.0530809	0.303872
ZNHIT6	-0.234483	-0.112346	-1.96199	0.0556874	0.311582	-4.60366	ZNHIT6	49	-1.98313	0.0531027	0.303872
GOT2	0.178534	0.0671083	1.93809	0.0586187	0.319322	-4.64652	GOT2	171	1.98301	0.0531166	0.303872
ZFYVE16	-0.182847	0.191331	-1.95016	0.0571228	0.315981	-4.62494	ZFYVE16	75	-1.98278	0.0531423	0.303872
PLCB1	0.804163	0.0763977	1.96721	0.0550644	0.31105	-4.59425	PLCB1	16	1.98242	0.0531847	0.303959
CHMP4C	0.982222	-0.708486	2.20657	0.0422022	0.270771	-3.69518	CHMP4C	1	2.07832	0.0532332	0.30403
OAS2	-0.458545	-0.0957626	-1.96397	0.0554498	0.311572	-4.60008	OAS2	51	-1.98184	0.0532515	0.30403
HMGB1	-0.190055	0.267962	-1.93686	0.0587737	0.319587	-4.64872	HMGB1	242	-1.9812	0.0533257	0.304299
ALDH3B1	-1.12583	0.690114	-2.05076	0.0529123	0.303879	-4.07907	ALDH3B1	1	-2.04218	0.0533572	0.304324
PROM1	-0.784159	0.351388	-1.97209	0.0544867	0.309546	-4.58541	PROM1	2	-1.98034	0.053425	0.304555
SKP1	0.0895575	-0.00801484	1.86616	0.0682512	0.345381	-4.77282	SKP1	138	1.97993	0.0534727	0.304672
GPI	0.249107	-0.299979	1.94417	0.0578614	0.317539	-4.63567	GPI	402	1.97869	0.0536164	0.305261
TRAF7	-0.15414	0.00280291	-1.9899	0.0524247	0.302862	-4.55305	TRAF7	19	-1.97857	0.0536306	0.305261
SNX8	-0.510549	0.18021	-1.9614	0.0557586	0.311675	-4.60473	SNX8	35	-1.97777	0.0537239	0.30546
ACOX1	0.209805	-0.118222	1.9492	0.05724	0.316005	-4.62665	ACOX1	74	1.97767	0.0537345	0.30546
CDK2	0.147184	-0.11238	1.94084	0.0582752	0.318423	-4.64162	CDK2	64	1.97733	0.0537745	0.30546
ACADS	0.467236	0.0414661	1.96214	0.0556687	0.311582	-4.60338	ACADS	27	1.97733	0.0537747	0.30546
TMEM30A	0.163816	0.15056	1.95856	0.0560997	0.312282	-4.60983	TMEM30A	38	1.97673	0.0538449	0.305588
UBE2T	0.340124	-0.199926	1.9584	0.0561193	0.312282	-4.61013	UBE2T	44	1.97634	0.0538908	0.305588
KIAA0930	0.237361	0.219663	1.97209	0.0544872	0.309546	-4.58542	KIAA0930	18	1.97593	0.0539375	0.305588
NCAPH2	-0.178376	-0.0563248	-1.96301	0.0555646	0.311572	-4.60182	NCAPH2	32	-1.97587	0.0539446	0.305588
SDR39U1	-0.366209	0.470663	-1.9699	0.0547447	0.310404	-4.58937	SDR39U1	10	-1.97581	0.0539525	0.305588
GLMP	0.430058	-0.248352	2.02562	0.0493291	0.291247	-4.41703	GLMP	1	1.98289	0.0539609	0.305588
FER	-0.499518	-0.282214	-1.9586	0.056095	0.312282	-4.60976	FER	36	-1.97505	0.0540411	0.305611
WASHC5	-0.135391	0.244917	-1.92048	0.0608621	0.325412	-4.67782	WASHC5	104	-1.97475	0.0540767	0.305611
FAAP20	-0.202704	-0.0201881	-2.05639	0.0453079	0.280731	-4.43004	FAAP20	3	-1.97445	0.0541113	0.305611
METTL14	0.158604	0.103438	1.95199	0.0568983	0.315207	-4.62165	METTL14	43	1.9744	0.0541175	0.305611
SUN1	-0.25956	0.00597661	-1.95291	0.0567858	0.31474	-4.62	SUN1	54	-1.97412	0.0541501	0.305611
MASP2	-0.745533	0.1061	-2.11559	0.0493476	0.291247	-4.10236	MASP2	1	-2.06056	0.0541839	0.305611
DACT1	-0.985288	0.169884	-1.98493	0.0550095	0.31105	-4.40891	DACT1	1	-1.99047	0.054195	0.305611
PRICKLE2	1.79262	-1.33877	2.04596	0.0585807	0.319322	-4.21912	PRICKLE2	1	2.07873	0.0541963	0.305611
PHC1	0.282425	0.0423154	1.96981	0.0547559	0.310404	-4.58954	PHC1	14	1.9736	0.0542107	0.305611
TLE3	-0.460148	-0.779415	-1.95672	0.0563224	0.313257	-4.61315	TLE3	34	-1.9729	0.0542933	0.30578
DMAC2	0.216882	-0.00117687	1.99773	0.0515388	0.299159	-4.53873	DMAC2	7	1.97281	0.0543033	0.30578
GTF2E2	0.110042	-0.0563435	1.93453	0.0590661	0.320605	-4.65286	GTF2E2	50	1.97251	0.0543388	0.30578
LDHB	0.20114	-0.0448518	1.93446	0.0590753	0.320605	-4.65299	LDHB	159	1.97242	0.05435	0.30578
ARL9	1.11659	-0.185281	1.96453	0.0560907	0.312282	-4.59611	ARL9	1	1.97571	0.0546423	0.307271
GID8	0.132225	-0.0535366	1.93483	0.059029	0.320605	-4.65234	GID8	54	1.96924	0.0547242	0.307577
RAB27A	0.428484	-0.460252	1.95529	0.056496	0.313935	-4.61572	RAB27A	20	1.96852	0.0548104	0.307906
CA2	-1.11308	-0.0926345	-1.95315	0.0567565	0.314733	-4.61956	CA2	6	-1.96782	0.0548928	0.308215
LY86	0.487656	0.269319	1.98462	0.053028	0.304085	-4.56266	LY86	1	1.96751	0.0549297	0.308231
SLC15A4	0.469024	0.148343	1.95856	0.0560999	0.312282	-4.60984	SLC15A4	8	1.96733	0.0549508	0.308231
ZFP36L1	0.536339	0.421266	1.96355	0.0555009	0.311572	-4.60085	ZFP36L1	3	1.9669	0.0550027	0.308367
VPS54	-0.162265	0.0782041	-1.97617	0.0540087	0.307569	-4.57803	VPS54	18	-1.96567	0.0551482	0.309028
[truncated: 9,198 more rows]
