# Supplementary material for: Multi-omics molecular phenotyping of childhood acute lymphoblastic leukemia cell lines reveals novel drug vulnerabilities
Source: Research Square preprint supplement (doi:10.21203/rs.3.rs-443839/v1), 2021-04-29
Supplement: Supplementary file 15 [file fbf8a75b66357f878d6a10f9.xlsx]

## Sheet: Supp_Table_10
Supplementary Table 10: Differential expression analysis of combined stranded and unstranded RNAseq data of MEF2D-rearranged clinical samples
Gene	Entrez	gene_type	genes_ID	chr	strand	logFC	logCPM	F	PValue	FDR
PTPRZ1	5803	protein_coding	ENSG00000106278.12	chr7	+	11.7	3.51	1460	4.44e-105	8.79e-101
ADCY8	114	protein_coding	ENSG00000155897.10	chr8	-	9.4	-0.839	861	5e-82	4.95e-78
ADGRG6	57211	protein_coding	ENSG00000112414.14	chr6	+	7.67	2.37	698	1.35e-73	8.91e-70
DGKI	9162	protein_coding	ENSG00000157680.15	chr7	-	8.07	2.22	636	5.8e-70	2.87e-66
HDAC9	9734	protein_coding	ENSG00000048052.21	chr7	+	4.15	5.76	565	1.77e-65	7.02e-62
GRXCR2	643226	protein_coding	ENSG00000204928.2	chr5	-	8.02	-0.98	489	3.27e-60	1.08e-56
GABRA2	2555	protein_coding	ENSG00000151834.15	chr4	-	7.79	-1.25	472	4.91e-59	1.39e-55
LRRC52	440699	protein_coding	ENSG00000162763.3	chr1	+	5.2	-4.23	447	4.36e-57	1.08e-53
CPXM2	119587	protein_coding	ENSG00000121898.13	chr10	-	7.84	1.37	443	8.58e-57	1.7e-53
FRMPD1	22844	protein_coding	ENSG00000070601.10	chr9	+	6.36	-0.402	443	8.17e-57	1.7e-53
CCDC80	151887	protein_coding	ENSG00000091986.15	chr3	-	5.71	1.8	441	1.28e-56	2.3e-53
KRTAP1-1	81851	protein_coding	ENSG00000188581.9	chr17	-	4.38	-4.38	407	2.39e-53	3.94e-50
ADCY2	108	protein_coding	ENSG00000078295.16	chr5	+	7.3	-1.05	390	1.48e-52	2.25e-49
ARHGAP6	395	protein_coding	ENSG00000047648.23	chrX	-	5.88	1.78	368	1.18e-50	1.67e-47
ATP2B2	491	protein_coding	ENSG00000157087.20	chr3	-	5.64	0.28	361	5.29e-50	6.98e-47
ANGPTL7	10218	protein_coding	ENSG00000171819.5	chr1	+	6.6	-1.53	344	1.47e-48	1.82e-45
PRMT8	56341	protein_coding	ENSG00000111218.11	chr12	+	5.98	-1.94	342	2.37e-48	2.76e-45
OPCML	4978	protein_coding	ENSG00000183715.13	chr11	-	6.8	-2.36	339	4.57e-48	5.03e-45
DNAH11	8701	protein_coding	ENSG00000105877.18	chr7	+	4.84	1.75	320	2.86e-46	2.98e-43
SLC26A9	115019	protein_coding	ENSG00000174502.19	chr1	-	5.24	-0.00688	314	1.02e-45	1.01e-42
MYLK3	91807	protein_coding	ENSG00000140795.13	chr16	-	5.06	0.402	306	5.09e-45	4.79e-42
ARX	170302	protein_coding	ENSG00000004848.8	chrX	-	5.77	-3.31	300	2.09e-44	1.88e-41
HSD17B12	51144	protein_coding	ENSG00000149084.13	chr11	+	1.91	4.27	287	4.51e-43	3.88e-40
MYOM2	9172	protein_coding	ENSG00000036448.10	chr8	+	4.51	3.26	285	6.74e-43	5.56e-40
SMOC1	64093	protein_coding	ENSG00000198732.10	chr14	+	6.69	0.0997	274	8.65e-42	6.85e-39
RBM46	166863	protein_coding	ENSG00000151962.8	chr4	+	6.07	-3.18	263	1.14e-40	8.68e-38
GRID1	2894	protein_coding	ENSG00000182771.19	chr10	-	6.71	-0.763	261	1.78e-40	1.3e-37
PTN	5764	protein_coding	ENSG00000105894.11	chr7	-	5.6	-3.31	255	8.88e-40	6.28e-37
PTPRR	5801	protein_coding	ENSG00000153233.13	chr12	-	6.66	-0.445	254	1.23e-39	8.38e-37
FOXF2	2295	protein_coding	ENSG00000137273.6	chr6	+	5.89	-3	248	4.75e-39	3.13e-36
BCL9	607	protein_coding	ENSG00000116128.11	chr1	+	3.51	3.66	231	3.44e-37	2.2e-34
PALM2-AKAP2	445815	protein_coding	ENSG00000157654.17	chr9	+	4.68	-3.94	225	1.58e-36	9.77e-34
SLC6A17	388662	protein_coding	ENSG00000197106.7	chr1	+	5.19	-2.91	216	2.02e-35	1.21e-32
ADSSL1	122622	protein_coding	ENSG00000185100.10	chr14	+	3.68	0.475	212	5.45e-35	3.17e-32
PALM2	114299	protein_coding	ENSG00000243444.8	chr9	+	5.33	0.378	211	6.43e-35	3.64e-32
SLC4A4	8671	protein_coding	ENSG00000080493.17	chr4	+	4.56	1.49	208	1.71e-34	9.38e-32
RBFOX2	23543	protein_coding	ENSG00000100320.23	chr22	-	4.94	3.84	198	2.49e-33	1.33e-30
IL13RA2	3598	protein_coding	ENSG00000123496.8	chrX	-	5.11	-3.67	196	4.37e-33	2.27e-30
ADAM23	8745	protein_coding	ENSG00000114948.13	chr2	+	6.13	3.62	196	4.71e-33	2.39e-30
DAZL	1618	protein_coding	ENSG00000092345.13	chr3	-	5.14	-1.98	186	6.63e-32	3.28e-29
AMELX	265	protein_coding	ENSG00000125363.14	chrX	+	4.21	-4.19	184	1.44e-31	6.93e-29
COL4A2	1284	protein_coding	ENSG00000134871.18	chr13	+	5.41	1.69	176	1.12e-30	5.26e-28
CPED1	79974	protein_coding	ENSG00000106034.18	chr7	+	3.87	2.42	175	1.54e-30	7.08e-28
KRTAP1-3	81850	protein_coding	ENSG00000221880.3	chr17	-	3.58	-4.4	173	2.81e-30	1.26e-27
ARHGEF9	23229	protein_coding	ENSG00000131089.15	chrX	-	1.86	4.22	173	3.19e-30	1.4e-27
LMX1B	4010	protein_coding	ENSG00000136944.17	chr9	+	6.64	-0.416	166	2.2e-29	9.48e-27
KLHL13	90293	protein_coding	ENSG00000003096.14	chrX	-	4.91	0.619	163	5.99e-29	2.52e-26
LOXL4	84171	protein_coding	ENSG00000138131.4	chr10	-	3.94	0.668	163	6.76e-29	2.79e-26
SPRR1A	6698	protein_coding	ENSG00000169474.4	chr1	+	3	-4.48	260	1.69e-28	6.85e-26
NXPE4	54827	protein_coding	ENSG00000137634.9	chr11	-	5.12	-3.15	158	3.1e-28	1.23e-25
OXCT1	5019	protein_coding	ENSG00000083720.13	chr5	-	1.89	4.7	154	1.1e-27	4.29e-25
SLC30A3	7781	protein_coding	ENSG00000115194.10	chr2	-	4.19	-1.98	152	1.93e-27	7.35e-25
WAPL	23063	protein_coding	ENSG00000062650.19	chr10	-	1.76	6.17	149	3.86e-27	1.44e-24
NUCB2	4925	protein_coding	ENSG00000070081.16	chr11	+	1.85	5.96	146	1.13e-26	4.16e-24
TENM2	57451	protein_coding	ENSG00000145934.16	chr5	+	5.6	-0.597	145	1.46e-26	5.26e-24
TMEM132A	54972	protein_coding	ENSG00000006118.14	chr11	+	4.07	0.237	144	2.28e-26	8.07e-24
HUNK	30811	protein_coding	ENSG00000142149.9	chr21	+	5.11	0.601	139	1.09e-25	3.8e-23
ADARB1	104	protein_coding	ENSG00000197381.16	chr21	+	3.62	4.36	138	1.34e-25	4.57e-23
CRP	1401	protein_coding	ENSG00000132693.12	chr1	-	3.89	-4.27	138	1.72e-25	5.76e-23
SYNPO2L	79933	protein_coding	ENSG00000166317.12	chr10	-	3.68	-1.09	136	2.47e-25	8.15e-23
SSUH2	51066	protein_coding	ENSG00000125046.15	chr3	-	3.43	-0.988	133	7.27e-25	2.36e-22
ALPK3	57538	protein_coding	ENSG00000136383.6	chr15	+	3.13	1.31	131	1.59e-24	5.08e-22
SCT	6343	protein_coding	ENSG00000070031.4	chr11	-	3.69	-2.47	129	2.37e-24	7.45e-22
HIP1	3092	protein_coding	ENSG00000127946.17	chr7	-	2.26	4.69	129	2.54e-24	7.86e-22
SLC16A8	23539	protein_coding	ENSG00000100156.10	chr22	-	4.36	0.162	129	2.7e-24	8.15e-22
MRAP2	112609	protein_coding	ENSG00000135324.6	chr6	+	4.23	-2.78	129	2.72e-24	8.15e-22
VEGFC	7424	protein_coding	ENSG00000150630.4	chr4	-	4.52	-2.63	129	3.18e-24	9.41e-22
MAGI2	9863	protein_coding	ENSG00000187391.21	chr7	-	2.93	0.322	126	7.23e-24	2.11e-21
EPB41L3	23136	protein_coding	ENSG00000082397.17	chr18	-	4.01	2.08	126	7.97e-24	2.29e-21
GLDC	2731	protein_coding	ENSG00000178445.9	chr9	-	3.07	3.21	125	1.01e-23	2.87e-21
PLEKHA5	54477	protein_coding	ENSG00000052126.14	chr12	+	-5.05	3.9	124	1.71e-23	4.77e-21
OR4C15	81309	protein_coding	ENSG00000181939.3	chr11	+	3.6	-4.34	123	1.78e-23	4.89e-21
FAM237A	200726	protein_coding	ENSG00000235118.8	chr2	+	3.4	-4.32	121	4.4e-23	1.19e-20
ELAVL2	1993	protein_coding	ENSG00000107105.15	chr9	-	4.53	-3.65	120	4.72e-23	1.26e-20
PPARGC1A	10891	protein_coding	ENSG00000109819.9	chr4	-	5.2	-0.877	119	7.55e-23	1.99e-20
FAM227A	646851	protein_coding	ENSG00000184949.16	chr22	-	2.46	0.145	119	8.93e-23	2.33e-20
SERPINI1	5274	protein_coding	ENSG00000163536.12	chr3	+	2.67	1.28	118	9.34e-23	2.4e-20
GIPR	2696	protein_coding	ENSG00000010310.9	chr19	+	3.23	-0.153	117	1.37e-22	3.46e-20
TMEM35A	59353	protein_coding	ENSG00000126950.8	chrX	+	3.94	-4.02	117	1.38e-22	3.46e-20
PDPN	10630	protein_coding	ENSG00000162493.16	chr1	+	5.13	-1.72	115	2.82e-22	6.98e-20
AMER2	219287	protein_coding	ENSG00000165566.12	chr13	-	5.26	-0.15	115	3.24e-22	7.93e-20
KCNMA1	3778	protein_coding	ENSG00000156113.23	chr10	-	4.25	2.25	115	3.36e-22	8.1e-20
TMEM231	79583	protein_coding	ENSG00000205084.11	chr16	-	2.28	0.117	114	4.23e-22	1.01e-19
WWC3	55841	protein_coding	ENSG00000047644.18	chrX	+	2.34	5.2	114	4.92e-22	1.16e-19
RASL10B	91608	protein_coding	ENSG00000270885.1	chr17	+	2.96	-1.09	113	5.85e-22	1.36e-19
CLVS1	157807	protein_coding	ENSG00000177182.11	chr8	+	3.46	-1.8	113	6.43e-22	1.48e-19
CCM2L	140706	protein_coding	ENSG00000101331.16	chr20	+	4.05	-3.32	112	7.93e-22	1.8e-19
GJA5	2702	protein_coding	ENSG00000265107.3	chr1	-	4.47	-2.8	109	2.36e-21	5.3e-19
ADAMTS7	11173	protein_coding	ENSG00000136378.15	chr15	-	3.7	2.96	108	3.03e-21	6.73e-19
REEP2	51308	protein_coding	ENSG00000132563.16	chr5	+	3.02	-1.08	108	3.61e-21	7.94e-19
LAMA3	3909	protein_coding	ENSG00000053747.16	chr18	+	3.81	4.38	105	1.06e-20	2.31e-18
FAM136A	84908	protein_coding	ENSG00000035141.8	chr2	-	1.22	3.96	101	3.45e-20	7.42e-18
HOXB1	3211	protein_coding	ENSG00000120094.9	chr17	-	3.66	-4.24	101	3.66e-20	7.78e-18
AC136352.3	0	protein_coding	ENSG00000277666.1	KI270727.1	-	2.8	-4.46	178	4.44e-20	9.36e-18
TEX11	56159	protein_coding	ENSG00000120498.13	chrX	-	3.78	-3.16	100	5.6e-20	1.17e-17
DEFB115	245929	protein_coding	ENSG00000215547.1	chr20	+	2.56	-4.48	142	6.94e-20	1.43e-17
GAREM1	64762	protein_coding	ENSG00000141441.16	chr18	-	3.81	1	99.1	8e-20	1.63e-17
GPR52	9293	protein_coding	ENSG00000203737.4	chr1	+	2.25	0.0145	97.5	1.42e-19	2.87e-17
EIPR1	7260	protein_coding	ENSG00000032389.12	chr2	-	1.82	4.58	96.8	1.84e-19	3.68e-17
FKBP10	60681	protein_coding	ENSG00000141756.18	chr17	+	3.4	-0.993	96.7	1.9e-19	3.77e-17
SMAP1	60682	protein_coding	ENSG00000112305.14	chr6	+	1.01	3.86	96.7	1.96e-19	3.84e-17
TMEM241	85019	protein_coding	ENSG00000134490.14	chr18	-	1.43	1.85	96.2	2.28e-19	4.42e-17
DCLK2	166614	protein_coding	ENSG00000170390.16	chr4	+	4.04	1.53	96.1	2.39e-19	4.59e-17
ZFHX2	85446	protein_coding	ENSG00000136367.14	chr14	-	2.57	-0.413	95.7	2.76e-19	5.25e-17
INHA	3623	protein_coding	ENSG00000123999.5	chr2	+	3.55	-4.03	95.5	2.97e-19	5.59e-17
RABGAP1L	9910	protein_coding	ENSG00000152061.23	chr1	+	1.34	5.9	94.4	4.44e-19	8.29e-17
ELK3	2004	protein_coding	ENSG00000111145.8	chr12	+	-3.22	6.16	94	5.06e-19	9.35e-17
MAP2	4133	protein_coding	ENSG00000078018.19	chr2	+	4.26	1.89	93.5	6.13e-19	1.12e-16
BAIAP2L2	80115	protein_coding	ENSG00000128298.17	chr22	-	2.12	0.573	92.9	7.55e-19	1.37e-16
LRRTM1	347730	protein_coding	ENSG00000162951.11	chr2	-	4.84	-2.58	92.8	7.9e-19	1.42e-16
ADK	132	protein_coding	ENSG00000156110.13	chr10	+	1.42	3.88	92.4	9.07e-19	1.62e-16
BTBD6	90135	protein_coding	ENSG00000184887.13	chr14	+	2.18	4.65	91.4	1.35e-18	2.38e-16
MIXL1	83881	protein_coding	ENSG00000185155.11	chr1	+	3.18	-2.02	91.1	1.48e-18	2.59e-16
ERBB4	2066	protein_coding	ENSG00000178568.15	chr2	-	4.9	-0.758	91.1	1.5e-18	2.6e-16
RGS8	85397	protein_coding	ENSG00000135824.12	chr1	-	4.04	-3.52	90.7	1.74e-18	3e-16
CACNA2D1	781	protein_coding	ENSG00000153956.16	chr7	-	4.78	-1.18	90.1	2.14e-18	3.65e-16
MYOM3	127294	protein_coding	ENSG00000142661.19	chr1	-	4.47	-2.44	88.5	3.95e-18	6.68e-16
HPGD	3248	protein_coding	ENSG00000164120.14	chr4	-	3.72	2.74	88.1	4.54e-18	7.61e-16
CRTAC1	55118	protein_coding	ENSG00000095713.14	chr10	-	4.19	-2.63	85.6	1.13e-17	1.88e-15
PYROXD2	84795	protein_coding	ENSG00000119943.13	chr10	-	1.68	2.16	85.6	1.16e-17	1.91e-15
VWC2	375567	protein_coding	ENSG00000188730.5	chr7	+	5.14	1.29	85.2	1.33e-17	2.18e-15
EPOP	100170841	protein_coding	ENSG00000273604.1	chr17	-	2.37	0.325	84.9	1.52e-17	2.46e-15
SLC6A5	9152	protein_coding	ENSG00000165970.11	chr11	+	3.89	-3.73	84.4	1.83e-17	2.94e-15
ATP1A3	478	protein_coding	ENSG00000105409.19	chr19	-	3.11	-0.274	84.3	1.89e-17	3.01e-15
MUC17	140453	protein_coding	ENSG00000169876.13	chr7	+	4.26	-3.03	83.4	2.67e-17	4.22e-15
RCOR2	283248	protein_coding	ENSG00000167771.6	chr11	-	3	-0.418	83.2	2.88e-17	4.52e-15
ZNF35	7584	protein_coding	ENSG00000169981.11	chr3	+	2.14	1.6	82.7	3.46e-17	5.39e-15
CLCN4	1183	protein_coding	ENSG00000073464.12	chrX	+	2.97	2	81.2	5.98e-17	9.25e-15
AADAT	51166	protein_coding	ENSG00000109576.14	chr4	-	4.36	0.0418	80	9.42e-17	1.45e-14
KRTAP1-5	83895	protein_coding	ENSG00000221852.5	chr17	-	2.89	-4.4	79.2	1.31e-16	2e-14
IRS1	3667	protein_coding	ENSG00000169047.5	chr2	-	2.9	3.73	78.7	1.55e-16	2.35e-14
POTEB3	102724631	protein_coding	ENSG00000278522.4	chr15	-	3.19	-4.21	78.4	1.76e-16	2.64e-14
FRMD5	84978	protein_coding	ENSG00000171877.21	chr15	-	3.57	-1.87	78.4	1.78e-16	2.65e-14
IGLL5	100423062	protein_coding	ENSG00000254709.7	chr22	+	3.9	3.02	78.3	1.8e-16	2.66e-14
MEF2C	4208	protein_coding	ENSG00000081189.15	chr5	-	-2.93	7.82	77.8	2.23e-16	3.27e-14
ANK3	288	protein_coding	ENSG00000151150.22	chr10	-	3.02	2.17	77.3	2.64e-16	3.85e-14
TFDP2	7029	protein_coding	ENSG00000114126.17	chr3	-	1.23	5.99	77	2.96e-16	4.25e-14
LINC02203	0	protein_coding	ENSG00000280709.2	chr15	+	3.15	-4.27	77	2.96e-16	4.25e-14
NFATC1	4772	protein_coding	ENSG00000131196.17	chr18	+	1.72	3.99	76.9	3.1e-16	4.42e-14
ANKRD29	147463	protein_coding	ENSG00000154065.17	chr18	-	2.74	-1.52	76.6	3.44e-16	4.86e-14
KIF5A	3798	protein_coding	ENSG00000155980.12	chr12	+	2.7	-1.28	74.7	7.18e-16	1.01e-13
VDAC1	7416	protein_coding	ENSG00000213585.11	chr5	-	1.51	6.45	74.2	8.95e-16	1.25e-13
CHRNB1	1140	protein_coding	ENSG00000170175.11	chr17	+	1.62	2.29	73.7	1.06e-15	1.46e-13
ASB15	142685	protein_coding	ENSG00000146809.13	chr7	+	3.74	-1.94	73.4	1.23e-15	1.69e-13
SAMD7	344658	protein_coding	ENSG00000187033.9	chr3	+	3.47	-2.97	72.7	1.58e-15	2.16e-13
PRKCH	5583	protein_coding	ENSG00000027075.15	chr14	+	-2.52	5.8	72.2	1.94e-15	2.63e-13
CAV3	859	protein_coding	ENSG00000182533.6	chr3	+	2.8	-3.95	71.8	2.26e-15	3.04e-13
TUBB4A	10382	protein_coding	ENSG00000104833.12	chr19	-	2.97	-1.14	71.5	2.53e-15	3.38e-13
ARHGEF25	115557	protein_coding	ENSG00000240771.8	chr12	+	3.47	-1.5	71.5	2.57e-15	3.41e-13
BCL11A	53335	protein_coding	ENSG00000119866.21	chr2	-	-2.25	7.06	71.3	2.71e-15	3.57e-13
LCK	3932	protein_coding	ENSG00000182866.17	chr1	+	1.98	4.67	71.3	2.78e-15	3.64e-13
MYADML2	255275	protein_coding	ENSG00000185105.5	chr17	-	3.42	-3.59	71.2	2.83e-15	3.69e-13
DTX3	196403	protein_coding	ENSG00000178498.16	chr12	+	2.87	2.42	70.8	3.4e-15	4.4e-13
VASH2	79805	protein_coding	ENSG00000143494.15	chr1	+	3.07	3.35	70.6	3.65e-15	4.69e-13
COBL	23242	protein_coding	ENSG00000106078.19	chr7	-	3.13	3.53	69.5	5.65e-15	7.22e-13
ZNF563	147837	protein_coding	ENSG00000188868.13	chr19	-	2.23	-0.023	69.4	5.85e-15	7.42e-13
MAN1A1	4121	protein_coding	ENSG00000111885.7	chr6	-	-3.22	6.78	69.2	6.26e-15	7.89e-13
BDH1	622	protein_coding	ENSG00000161267.12	chr3	-	1.46	3.59	69.2	6.37e-15	7.98e-13
TET2	54790	protein_coding	ENSG00000168769.13	chr4	+	-2.34	5.41	68.7	7.76e-15	9.66e-13
SOCS7	30837	protein_coding	ENSG00000274211.6	chr17	+	1.01	4.54	68.3	8.94e-15	1.11e-12
ASPA	443	protein_coding	ENSG00000108381.11	chr17	+	3.61	-1.89	68.3	9.05e-15	1.11e-12
AKNA	80709	protein_coding	ENSG00000106948.16	chr9	-	-1.43	7.12	67.7	1.14e-14	1.4e-12
GRIP1	23426	protein_coding	ENSG00000155974.12	chr12	-	2.95	1.68	67.1	1.45e-14	1.76e-12
FDX1	2230	protein_coding	ENSG00000137714.3	chr11	+	1.21	3.59	67	1.52e-14	1.83e-12
DRP2	1821	protein_coding	ENSG00000102385.12	chrX	+	1.97	-0.731	66.8	1.61e-14	1.93e-12
UNC5B	219699	protein_coding	ENSG00000107731.12	chr10	+	3.02	-0.919	66.5	1.83e-14	2.18e-12
ESRRG	2104	protein_coding	ENSG00000196482.17	chr1	-	3.9	-2.26	66.5	1.85e-14	2.19e-12
KLF3	51274	protein_coding	ENSG00000109787.13	chr4	+	-2.78	6.45	65.4	2.87e-14	3.38e-12
MYO5C	55930	protein_coding	ENSG00000128833.13	chr15	-	-2.92	5.72	65.3	2.95e-14	3.45e-12
PAGE3	139793	protein_coding	ENSG00000204279.7	chrX	-	3.25	-4.15	65.2	3.11e-14	3.62e-12
ZNF319	57567	protein_coding	ENSG00000166188.2	chr16	-	1.1	3.29	65.1	3.28e-14	3.8e-12
LCLAT1	253558	protein_coding	ENSG00000172954.13	chr2	+	1.03	3.11	65	3.38e-14	3.89e-12
PREX1	57580	protein_coding	ENSG00000124126.14	chr20	-	-2.06	7.92	64.9	3.53e-14	4.02e-12
NRIP1	8204	protein_coding	ENSG00000180530.11	chr21	-	-2.57	7.81	64.9	3.53e-14	4.02e-12
CNPY2	10330	protein_coding	ENSG00000257727.6	chr12	-	0.812	1.94	64.6	3.92e-14	4.43e-12
SARM1	23098	protein_coding	ENSG00000004139.14	chr17	+	1.53	2.51	64.5	4.13e-14	4.65e-12
PTPN12	5782	protein_coding	ENSG00000127947.16	chr7	+	-2.26	5.72	64.4	4.32e-14	4.84e-12
GMCL1	64395	protein_coding	ENSG00000087338.5	chr2	+	0.948	4.53	64.3	4.4e-14	4.89e-12
MTSS2	92154	protein_coding	ENSG00000132613.15	chr16	-	2.77	4.15	64.3	4.49e-14	4.96e-12
GPR26	2849	protein_coding	ENSG00000154478.3	chr10	+	3.29	-3.76	64.2	4.7e-14	5.17e-12
HSPB7	27129	protein_coding	ENSG00000173641.17	chr1	-	3.37	-2.84	64	5.01e-14	5.48e-12
GUCY1B1	2983	protein_coding	ENSG00000061918.13	chr4	+	-3.51	2.24	64	5.05e-14	5.49e-12
PKHD1	5314	protein_coding	ENSG00000170927.14	chr6	-	3.39	-1.07	63.9	5.15e-14	5.57e-12
SH3RF2	153769	protein_coding	ENSG00000156463.18	chr5	+	3.35	-2.27	63.8	5.35e-14	5.75e-12
CKM	1158	protein_coding	ENSG00000104879.5	chr19	-	3.98	-0.228	63.4	6.26e-14	6.66e-12
FMOD	2331	protein_coding	ENSG00000122176.12	chr1	-	3.29	-2.13	63.4	6.25e-14	6.66e-12
IL1RAP	3556	protein_coding	ENSG00000196083.10	chr3	+	-3.47	4.3	63	7.52e-14	7.96e-12
CCT8	10694	protein_coding	ENSG00000156261.13	chr21	-	1.09	6.75	62.9	7.87e-14	8.26e-12
TCF4	6925	protein_coding	ENSG00000196628.17	chr18	-	-2.8	8.71	62.9	7.89e-14	8.26e-12
TBC1D1	23216	protein_coding	ENSG00000065882.16	chr4	+	0.891	6.74	62.5	9.3e-14	9.69e-12
MDM2	4193	protein_coding	ENSG00000135679.25	chr12	+	1.61	8.33	62.4	9.47e-14	9.82e-12
BCAT1	586	protein_coding	ENSG00000060982.15	chr12	-	2.1	5.57	62.2	1.03e-13	1.06e-11
MYLK	4638	protein_coding	ENSG00000065534.18	chr3	-	2.09	6.1	62.1	1.06e-13	1.09e-11
CYFIP1	23191	protein_coding	ENSG00000273749.5	chr15	-	1.81	6.02	61.7	1.25e-13	1.27e-11
RASL12	51285	protein_coding	ENSG00000103710.11	chr15	-	3.85	-0.635	61.7	1.26e-13	1.28e-11
LGR6	59352	protein_coding	ENSG00000133067.17	chr1	+	3.15	3.22	61.5	1.39e-13	1.41e-11
TIFA	92610	protein_coding	ENSG00000145365.11	chr4	-	1.55	5.63	61.3	1.48e-13	1.48e-11
NOXA1	10811	protein_coding	ENSG00000188747.8	chr9	+	2.35	0.669	61.3	1.48e-13	1.48e-11
PLD4	122618	protein_coding	ENSG00000166428.13	chr14	+	2.25	4.09	61.2	1.57e-13	1.55e-11
PRICKLE2	166336	protein_coding	ENSG00000163637.13	chr3	-	3.58	-2.14	61.2	1.57e-13	1.55e-11
SEMA3A	10371	protein_coding	ENSG00000075213.11	chr7	-	3.5	-0.383	61.1	1.59e-13	1.57e-11
KCNMB2	10242	protein_coding	ENSG00000197584.12	chr3	+	3.15	-3.32	60.9	1.73e-13	1.69e-11
HPSE2	60495	protein_coding	ENSG00000172987.12	chr10	-	4.07	-1.31	60.9	1.76e-13	1.72e-11
DSTYK	25778	protein_coding	ENSG00000133059.17	chr1	-	-1.75	3.59	60.8	1.79e-13	1.74e-11
GPT2	84706	protein_coding	ENSG00000166123.14	chr16	+	2.75	2.4	60.8	1.83e-13	1.77e-11
SNTA1	6640	protein_coding	ENSG00000101400.5	chr20	-	2.07	2.36	60.5	2.06e-13	1.98e-11
MPC1	51660	protein_coding	ENSG00000060762.19	chr6	-	1.04	3.48	60.3	2.21e-13	2.11e-11
ST3GAL5	8869	protein_coding	ENSG00000115525.18	chr2	-	-1.74	4.69	60.3	2.22e-13	2.11e-11
GPR62	118442	protein_coding	ENSG00000180929.6	chr3	+	2.84	-3.59	60.1	2.41e-13	2.28e-11
ACVR1	90	protein_coding	ENSG00000115170.13	chr2	-	-1.42	2.44	59.5	3.14e-13	2.96e-11
PNMA2	10687	protein_coding	ENSG00000240694.9	chr8	-	3.46	-2.1	59.4	3.29e-13	3.08e-11
CCNO	10309	protein_coding	ENSG00000152669.9	chr5	-	3.03	-2.82	59.2	3.55e-13	3.3e-11
THEG	51298	protein_coding	ENSG00000105549.10	chr19	-	3.27	-3.76	59.2	3.54e-13	3.3e-11
FAM114A1	92689	protein_coding	ENSG00000197712.12	chr4	+	-2.74	0.53	58.9	4.01e-13	3.71e-11
RAPGEF2	9693	protein_coding	ENSG00000109756.9	chr4	+	1.27	7.05	58.7	4.25e-13	3.92e-11
TNFRSF10B	8795	protein_coding	ENSG00000120889.13	chr8	-	-2.33	4.93	58.7	4.36e-13	3.99e-11
SSH2	85464	protein_coding	ENSG00000141298.19	chr17	-	-1.57	7.71	58.4	4.83e-13	4.39e-11
SHANK1	50944	protein_coding	ENSG00000161681.15	chr19	-	2.41	4.01	58.4	4.82e-13	4.39e-11
PSAT1	29968	protein_coding	ENSG00000135069.14	chr9	+	2.39	1.57	58.2	5.23e-13	4.73e-11
OXTR	5021	protein_coding	ENSG00000180914.10	chr3	-	1.81	0.018	57.2	8.04e-13	7.24e-11
KCNJ6	3763	protein_coding	ENSG00000157542.11	chr21	-	3.14	-2.65	57	8.48e-13	7.59e-11
OOSP1	0	protein_coding	ENSG00000284873.1	chr11	+	3.11	-3.3	57	8.66e-13	7.72e-11
PTCRA	171558	protein_coding	ENSG00000171611.9	chr6	+	2.99	-1.09	56.5	1.08e-12	9.53e-11
ARHGAP44	9912	protein_coding	ENSG00000006740.17	chr17	+	2.79	0.315	56.5	1.08e-12	9.53e-11
METTL21C	196541	protein_coding	ENSG00000139780.7	chr13	-	3.11	-3.44	56.4	1.09e-12	9.62e-11
XKR5	389610	protein_coding	ENSG00000275591.4	chr8	-	2.98	-1.95	56.2	1.19e-12	1.04e-10
OSR2	116039	protein_coding	ENSG00000164920.9	chr8	+	3.22	0.166	55.2	1.8e-12	1.57e-10
XPOT	11260	protein_coding	ENSG00000184575.12	chr12	+	0.828	5.95	55.1	1.9e-12	1.64e-10
NRP1	8829	protein_coding	ENSG00000099250.18	chr10	-	-6.16	3.62	55.1	1.89e-12	1.64e-10
BTBD3	22903	protein_coding	ENSG00000132640.15	chr20	+	1.68	5.57	55	1.96e-12	1.68e-10
FAIM	55179	protein_coding	ENSG00000158234.12	chr3	+	1.46	2.81	55	1.96e-12	1.68e-10
TXNDC12	51060	protein_coding	ENSG00000117862.12	chr1	-	1.02	2.44	55	1.99e-12	1.69e-10
PELI3	246330	protein_coding	ENSG00000174516.15	chr11	+	1.39	2.11	54.9	2.07e-12	1.76e-10
ARMC9	80210	protein_coding	ENSG00000135931.17	chr2	+	1.86	0.465	54.9	2.07e-12	1.76e-10
C16orf87	388272	protein_coding	ENSG00000155330.10	chr16	-	1.08	4.15	54.8	2.15e-12	1.81e-10
RASA2	5922	protein_coding	ENSG00000155903.11	chr3	+	-1.44	6.15	54.6	2.32e-12	1.94e-10
THEMIS2	9473	protein_coding	ENSG00000130775.16	chr1	+	-2.51	6.62	54.5	2.44e-12	2.04e-10
EYA1	2138	protein_coding	ENSG00000104313.20	chr8	-	3.28	-1.98	54.5	2.45e-12	2.04e-10
SLC26A10	65012	protein_coding	ENSG00000135502.18	chr12	+	3.28	-2.29	54.1	2.93e-12	2.43e-10
DIXDC1	85458	protein_coding	ENSG00000150764.13	chr11	+	1.94	-0.575	54	2.96e-12	2.44e-10
STK32B	55351	protein_coding	ENSG00000152953.13	chr4	+	-3.35	6.2	54	3.02e-12	2.48e-10
GSTA2	2939	protein_coding	ENSG00000244067.3	chr6	-	3.5	-3.86	53.9	3.06e-12	2.51e-10
COL4A1	1282	protein_coding	ENSG00000187498.16	chr13	-	3.77	0.875	53.9	3.17e-12	2.58e-10
CMSS1	84319	protein_coding	ENSG00000184220.12	chr3	+	1.13	2.92	53.7	3.36e-12	2.73e-10
NECTIN1	5818	protein_coding	ENSG00000110400.11	chr11	-	2.4	4.01	53.6	3.61e-12	2.91e-10
PHOX2B	8929	protein_coding	ENSG00000109132.6	chr4	-	3.01	-4.12	53.5	3.62e-12	2.92e-10
PODXL	5420	protein_coding	ENSG00000128567.17	chr7	-	1.52	1.52	53.5	3.76e-12	3.02e-10
FAM171A2	284069	protein_coding	ENSG00000161682.14	chr17	-	2.57	-0.821	53.4	3.83e-12	3.06e-10
KIF1A	547	protein_coding	ENSG00000130294.16	chr2	-	3.43	-1.7	53.4	3.86e-12	3.07e-10
EPHA7	2045	protein_coding	ENSG00000135333.14	chr6	-	-7.82	4.42	53.4	3.89e-12	3.08e-10
ATP10D	57205	protein_coding	ENSG00000145246.13	chr4	+	1.3	4.28	53.3	3.98e-12	3.14e-10
TMEM201	199953	protein_coding	ENSG00000188807.13	chr1	+	1.22	3.74	53.3	4e-12	3.14e-10
CTNNBL1	56259	protein_coding	ENSG00000132792.19	chr20	+	1.08	4.83	53.3	4.09e-12	3.2e-10
KCNJ2	3759	protein_coding	ENSG00000123700.4	chr17	+	3.39	2.72	53.2	4.14e-12	3.23e-10
NHSL1	57224	protein_coding	ENSG00000135540.11	chr6	-	1.78	1.58	53	4.63e-12	3.59e-10
C5orf51	285636	protein_coding	ENSG00000205765.9	chr5	+	1.15	3.46	52.8	4.87e-12	3.77e-10
NCR3LG1	374383	protein_coding	ENSG00000188211.8	chr11	+	1.96	0.739	52.5	5.63e-12	4.34e-10
SLC2A10	81031	protein_coding	ENSG00000197496.6	chr20	+	2.86	-2.19	52.4	5.78e-12	4.44e-10
SLC7A3	84889	protein_coding	ENSG00000165349.12	chrX	-	3.07	2.63	52.3	5.99e-12	4.58e-10
HYAL4	23553	protein_coding	ENSG00000106302.9	chr7	+	3.52	-3.37	52.3	6.14e-12	4.67e-10
MAST1	22983	protein_coding	ENSG00000105613.10	chr19	+	2.55	-0.917	52.2	6.46e-12	4.9e-10
HOPX	84525	protein_coding	ENSG00000171476.22	chr4	-	2.42	2.16	52	6.84e-12	5.17e-10
GRSF1	2926	protein_coding	ENSG00000132463.14	chr4	-	0.687	5.44	52	7.05e-12	5.29e-10
KLHL42	57542	protein_coding	ENSG00000087448.11	chr12	+	1.24	4.31	52	7.03e-12	5.29e-10
VPS13B	157680	protein_coding	ENSG00000132549.18	chr8	+	0.928	6.51	51.9	7.34e-12	5.48e-10
HES3	390992	protein_coding	ENSG00000173673.7	chr1	+	2.31	-4.39	51.8	7.46e-12	5.55e-10
EPHA3	2042	protein_coding	ENSG00000044524.11	chr3	+	4.48	1.51	51.8	7.53e-12	5.59e-10
TUNAR	0	protein_coding	ENSG00000250366.2	chr14	+	2.52	2.13	51.6	8.02e-12	5.92e-10
ZNF286A	57335	protein_coding	ENSG00000187607.16	chr17	+	1.35	1.77	51.6	8.17e-12	6.02e-10
RASGRP1	10125	protein_coding	ENSG00000172575.12	chr15	-	1.43	4.74	51.5	8.37e-12	6.14e-10
SERPINB9	5272	protein_coding	ENSG00000170542.6	chr6	-	-2.21	5.83	51.5	8.6e-12	6.26e-10
KLHL23	151230	protein_coding	ENSG00000213160.10	chr2	+	2.31	2.02	51.5	8.59e-12	6.26e-10
B4GALNT1	2583	protein_coding	ENSG00000135454.14	chr12	-	2.89	-3.11	51.3	9.43e-12	6.83e-10
PROB1	389333	protein_coding	ENSG00000228672.3	chr5	-	1.33	2.13	51.2	9.6e-12	6.94e-10
SBF2	81846	protein_coding	ENSG00000133812.15	chr11	-	-1.9	4.93	51.2	9.84e-12	7.09e-10
SLAIN1	122060	protein_coding	ENSG00000139737.22	chr13	+	1.38	4.67	51.1	1.02e-11	7.29e-10
ZNF114	163071	protein_coding	ENSG00000178150.10	chr19	+	2.24	0.0909	51	1.04e-11	7.44e-10
MYOZ1	58529	protein_coding	ENSG00000177791.11	chr10	-	2.64	-3.55	51	1.05e-11	7.45e-10
KCNQ3	3786	protein_coding	ENSG00000184156.17	chr8	-	3.07	-0.207	51	1.06e-11	7.49e-10
DGKH	160851	protein_coding	ENSG00000102780.16	chr13	+	1.62	4.95	51	1.08e-11	7.61e-10
STAC	6769	protein_coding	ENSG00000144681.10	chr3	+	3.1	-1.01	50.9	1.11e-11	7.83e-10
DAAM1	23002	protein_coding	ENSG00000100592.15	chr14	+	1.36	4.27	50.8	1.17e-11	8.19e-10
RPS6KA2	6196	protein_coding	ENSG00000071242.12	chr6	-	-2.82	3.3	50.7	1.21e-11	8.47e-10
DMXL2	23312	protein_coding	ENSG00000104093.13	chr15	-	-1.97	5.1	50.6	1.23e-11	8.52e-10
SCN5A	6331	protein_coding	ENSG00000183873.15	chr3	-	3.19	-0.232	50.6	1.23e-11	8.52e-10
FGF9	2254	protein_coding	ENSG00000102678.6	chr13	+	2.84	0.253	50.5	1.29e-11	8.94e-10
RFC5	5985	protein_coding	ENSG00000111445.14	chr12	+	1.2	4.24	50.5	1.32e-11	9.08e-10
CACNA1S	779	protein_coding	ENSG00000081248.11	chr1	-	2.96	-3.14	50.4	1.34e-11	9.22e-10
TUBA3E	112714	protein_coding	ENSG00000152086.9	chr2	-	2.74	-3.55	50.4	1.37e-11	9.42e-10
PIK3R5	23533	protein_coding	ENSG00000141506.13	chr17	-	-2.21	6.02	50.3	1.39e-11	9.47e-10
PKIA	5569	protein_coding	ENSG00000171033.13	chr8	+	2.48	1.8	50.2	1.47e-11	1e-09
HDAC1	3065	protein_coding	ENSG00000116478.12	chr1	+	0.797	6.03	50.2	1.5e-11	1.01e-09
GUCY1A1	2982	protein_coding	ENSG00000164116.16	chr4	+	-3.11	4.85	50.2	1.51e-11	1.02e-09
PIP5K1B	8395	protein_coding	ENSG00000107242.19	chr9	+	1.8	3.64	50	1.61e-11	1.09e-09
C21orf91	54149	protein_coding	ENSG00000154642.11	chr21	-	1.52	4.6	49.9	1.66e-11	1.12e-09
PGM1	5236	protein_coding	ENSG00000079739.17	chr1	+	1.58	3.04	49.8	1.73e-11	1.16e-09
PYHIN1	149628	protein_coding	ENSG00000163564.14	chr1	+	-3.64	3.99	49.7	1.79e-11	1.2e-09
MAP3K7CL	56911	protein_coding	ENSG00000156265.15	chr21	+	1.94	2.74	49.6	1.89e-11	1.26e-09
CHRNA3	1136	protein_coding	ENSG00000080644.16	chr15	-	3.21	-1.24	49.4	2.04e-11	1.35e-09
MAML2	84441	protein_coding	ENSG00000184384.14	chr11	-	-1.89	4.83	49.3	2.13e-11	1.41e-09
FOXL2NB	401089	protein_coding	ENSG00000206262.9	chr3	+	3.53	-3.26	49.3	2.14e-11	1.41e-09
SHMT2	6472	protein_coding	ENSG00000182199.11	chr12	+	1.18	5.04	49.2	2.25e-11	1.48e-09
IFI16	3428	protein_coding	ENSG00000163565.18	chr1	+	-1.38	6.94	49.1	2.33e-11	1.52e-09
CSGALNACT1	55790	protein_coding	ENSG00000147408.14	chr8	-	-2.71	5.39	49.1	2.4e-11	1.56e-09
TWSG1	57045	protein_coding	ENSG00000128791.12	chr18	+	1.13	3.87	48.7	2.75e-11	1.78e-09
CFAP36	112942	protein_coding	ENSG00000163001.11	chr2	+	0.91	2.8	48.7	2.83e-11	1.83e-09
TBC1D24	57465	protein_coding	ENSG00000162065.14	chr16	+	1.35	3.1	48.6	2.92e-11	1.88e-09
TLR6	10333	protein_coding	ENSG00000174130.12	chr4	-	-2.74	3.66	48.5	3.09e-11	1.99e-09
HID1	283987	protein_coding	ENSG00000167861.16	chr17	-	2.34	-0.321	48.4	3.17e-11	2.03e-09
SLC27A2	11001	protein_coding	ENSG00000140284.11	chr15	+	2.72	1.82	48.3	3.25e-11	2.07e-09
MAGI1	9223	protein_coding	ENSG00000151276.23	chr3	-	4.05	1.37	48.3	3.33e-11	2.12e-09
SCIN	85477	protein_coding	ENSG00000006747.15	chr7	+	3.51	-1.32	48.2	3.41e-11	2.16e-09
ST3GAL6	10402	protein_coding	ENSG00000064225.12	chr3	+	-3.98	2.65	48.2	3.46e-11	2.19e-09
MPV17L	255027	protein_coding	ENSG00000156968.9	chr16	+	3.07	0.275	48	3.74e-11	2.36e-09
COA7	65260	protein_coding	ENSG00000162377.6	chr1	-	1.13	2.79	48	3.8e-11	2.38e-09
FAM92A	137392	protein_coding	ENSG00000188343.12	chr8	+	2.22	0.818	48	3.78e-11	2.38e-09
PRR36	80164	protein_coding	ENSG00000183248.12	chr19	-	3.32	-1.05	47.9	3.85e-11	2.4e-09
ETFA	2108	protein_coding	ENSG00000140374.16	chr15	-	0.972	4.79	47.8	4.13e-11	2.55e-09
LRRC34	151827	protein_coding	ENSG00000171757.15	chr3	-	1.76	0.978	47.8	4.11e-11	2.55e-09
ACOT6	641372	protein_coding	ENSG00000205669.3	chr14	+	2.54	-4.23	47.8	4.1e-11	2.55e-09
STYK1	55359	protein_coding	ENSG00000060140.9	chr12	-	-3.81	1.78	47.7	4.21e-11	2.6e-09
F12	2161	protein_coding	ENSG00000131187.9	chr5	-	1.94	-0.43	47.7	4.33e-11	2.66e-09
MCCC2	64087	protein_coding	ENSG00000131844.16	chr5	+	0.773	4.03	47.6	4.38e-11	2.69e-09
PCSK9	255738	protein_coding	ENSG00000169174.10	chr1	+	3.37	-2.08	47.6	4.55e-11	2.78e-09
DSE	29940	protein_coding	ENSG00000111817.17	chr6	+	-1.88	4.61	47.5	4.62e-11	2.81e-09
RNASET2	8635	protein_coding	ENSG00000026297.15	chr6	-	-1.59	5.96	47.5	4.67e-11	2.83e-09
HPCAL1	3241	protein_coding	ENSG00000115756.13	chr2	+	-1.43	4.87	47.5	4.69e-11	2.84e-09
GBP4	115361	protein_coding	ENSG00000162654.9	chr1	-	-2.13	7.05	47.4	4.94e-11	2.98e-09
CLYBL	171425	protein_coding	ENSG00000125246.15	chr13	+	1.45	0.92	47	5.66e-11	3.41e-09
ADSL	158	protein_coding	ENSG00000239900.12	chr22	+	0.774	2.29	47	5.81e-11	3.48e-09
ACBD3	64746	protein_coding	ENSG00000182827.9	chr1	-	0.817	5.14	47	5.88e-11	3.52e-09
MROH9	80133	protein_coding	ENSG00000117501.14	chr1	+	3.48	-3.29	46.8	6.15e-11	3.67e-09
SLC2A11	66035	protein_coding	ENSG00000133460.19	chr22	+	1.16	2.95	46.7	6.45e-11	3.84e-09
GK5	256356	protein_coding	ENSG00000175066.16	chr3	-	1.14	3.81	46.6	6.71e-11	3.98e-09
CCDC50	152137	protein_coding	ENSG00000152492.15	chr3	+	-2.06	6.29	46.6	6.97e-11	4.12e-09
ANKRD35	148741	protein_coding	ENSG00000198483.13	chr1	-	2.28	-2.38	46.5	7.04e-11	4.15e-09
CUX1	1523	protein_coding	ENSG00000257923.11	chr7	+	0.914	6.89	46.5	7.22e-11	4.24e-09
AC135068.1	0	protein_coding	ENSG00000182974.3	chr15	+	2.04	-4.52	178	7.57e-11	4.43e-09
CYBB	1536	protein_coding	ENSG00000165168.7	chrX	+	-3.14	6.39	46.2	8.12e-11	4.74e-09
IL6ST	3572	protein_coding	ENSG00000134352.20	chr5	-	-2.05	7.45	46.1	8.5e-11	4.93e-09
ADO	84890	protein_coding	ENSG00000181915.4	chr10	+	0.794	3.68	46.1	8.48e-11	4.93e-09
NYNRIN	57523	protein_coding	ENSG00000205978.6	chr14	+	2.64	3.45	46.1	8.52e-11	4.93e-09
SLC4A8	9498	protein_coding	ENSG00000050438.17	chr12	+	1.95	2.91	46	8.97e-11	5.17e-09
OR2L3	391192	protein_coding	ENSG00000198128.4	chr1	+	-5.32	-1.77	46	9.01e-11	5.18e-09
CEACAM19	56971	protein_coding	ENSG00000186567.12	chr19	+	2.71	-1.84	45.9	9.16e-11	5.25e-09
TMEM200C	645369	protein_coding	ENSG00000206432.4	chr18	-	4.1	-0.0438	45.8	9.45e-11	5.41e-09
CCDC69	26112	protein_coding	ENSG00000198624.13	chr5	-	1.24	6.66	45.8	9.68e-11	5.52e-09
NEK6	10783	protein_coding	ENSG00000119408.16	chr9	+	-1.89	4.04	45.7	9.9e-11	5.63e-09
ST8SIA2	8128	protein_coding	ENSG00000140557.12	chr15	+	3.63	-1.97	45.7	1.01e-10	5.7e-09
ATF5	22809	protein_coding	ENSG00000169136.11	chr19	+	2.05	4.47	45.7	1.02e-10	5.78e-09
HIRA	7290	protein_coding	ENSG00000100084.14	chr22	-	0.858	2.83	45.6	1.05e-10	5.91e-09
RAG1	5896	protein_coding	ENSG00000166349.9	chr11	+	-4.24	7.75	45.5	1.09e-10	6.12e-09
MRPL16	54948	protein_coding	ENSG00000166902.5	chr11	-	1.03	4.03	45.5	1.09e-10	6.12e-09
UACA	55075	protein_coding	ENSG00000137831.15	chr15	-	-4.95	2.76	45.4	1.13e-10	6.3e-09
FKBP7	51661	protein_coding	ENSG00000079150.18	chr2	-	1.27	0.0174	45.4	1.14e-10	6.38e-09
AC124319.1	57674	protein_coding	ENSG00000173821.19	chr17	+	-1.19	8.7	45.3	1.17e-10	6.5e-09
HACD1	9200	protein_coding	ENSG00000165996.14	chr10	-	1.55	3.54	45.4	1.17e-10	6.5e-09
INA	9118	protein_coding	ENSG00000148798.11	chr10	+	2.96	-1.72	45.3	1.19e-10	6.58e-09
ARHGAP24	83478	protein_coding	ENSG00000138639.18	chr4	+	-5.91	4.92	45.3	1.21e-10	6.69e-09
EFR3B	22979	protein_coding	ENSG00000084710.14	chr2	+	2.45	1.36	45	1.35e-10	7.4e-09
KCNJ4	3761	protein_coding	ENSG00000168135.4	chr22	-	3.26	-3	45	1.35e-10	7.4e-09
H1FOO	132243	protein_coding	ENSG00000178804.7	chr3	+	2.54	-4.05	45	1.35e-10	7.4e-09
C21orf59-TCP10L	110091775	protein_coding	ENSG00000265590.9	chr21	-	2.03	-4.4	44.9	1.4e-10	7.63e-09
TRIM17	51127	protein_coding	ENSG00000162931.12	chr1	-	2.34	-1.86	44.8	1.46e-10	7.91e-09
OVCH2	341277	protein_coding	ENSG00000183378.11	chr11	-	-9.25	4.17	44.8	1.49e-10	8.11e-09
SLC39A14	23516	protein_coding	ENSG00000104635.14	chr8	+	1.62	3.09	44.7	1.54e-10	8.33e-09
PRKAR2B	5577	protein_coding	ENSG00000005249.13	chr7	+	-2.79	4.06	44.7	1.55e-10	8.34e-09
TMEM156	80008	protein_coding	ENSG00000121895.8	chr4	-	-3.02	4.46	44.7	1.56e-10	8.41e-09
XYLT1	64131	protein_coding	ENSG00000103489.11	chr16	-	1.21	6.21	44.6	1.58e-10	8.5e-09
DBI	1622	protein_coding	ENSG00000155368.16	chr2	+	1.41	5.05	44.6	1.64e-10	8.76e-09
TNFRSF1B	7133	protein_coding	ENSG00000028137.19	chr1	+	-2.31	5.42	44.5	1.67e-10	8.89e-09
COLCA2	120376	protein_coding	ENSG00000214290.8	chr11	+	2.62	-1.33	44.5	1.7e-10	9.05e-09
TBC1D9	23158	protein_coding	ENSG00000109436.8	chr4	-	-3.98	4.39	44.3	1.86e-10	9.88e-09
C1orf198	84886	protein_coding	ENSG00000119280.16	chr1	-	1.55	1.78	44.2	1.95e-10	1.03e-08
SYNGR1	9145	protein_coding	ENSG00000100321.15	chr22	+	-2.48	5.04	44.1	1.97e-10	1.04e-08
AMPD3	272	protein_coding	ENSG00000133805.15	chr11	+	-1.87	4.37	44.1	2e-10	1.05e-08
ABI2	10152	protein_coding	ENSG00000138443.16	chr2	+	0.962	4.66	44	2.06e-10	1.08e-08
LRRC8C	84230	protein_coding	ENSG00000171488.15	chr1	+	-1.41	6.8	44	2.13e-10	1.11e-08
AC025165.6	0	protein_coding	ENSG00000287908.1	chr12	+	2.82	-3.67	43.9	2.2e-10	1.15e-08
LIPC	3990	protein_coding	ENSG00000166035.11	chr15	+	1.79	1.42	43.7	2.35e-10	1.22e-08
STK39	27347	protein_coding	ENSG00000198648.11	chr2	-	1.16	5.33	43.7	2.44e-10	1.26e-08
TM7SF2	7108	protein_coding	ENSG00000149809.14	chr11	+	0.856	2.75	43.7	2.43e-10	1.26e-08
KLHL5	51088	protein_coding	ENSG00000109790.16	chr4	+	-2.01	5.02	43.6	2.45e-10	1.27e-08
PSMD14	10213	protein_coding	ENSG00000115233.12	chr2	+	0.624	4.64	43.6	2.46e-10	1.27e-08
PTGR1	22949	protein_coding	ENSG00000106853.20	chr9	-	-3.68	0.207	43.6	2.51e-10	1.29e-08
CMTM2	146225	protein_coding	ENSG00000140932.10	chr16	+	-4.33	2.12	43.4	2.69e-10	1.38e-08
MOB3B	79817	protein_coding	ENSG00000120162.10	chr9	-	-2.41	3.43	43.3	2.78e-10	1.42e-08
SH3TC1	54436	protein_coding	ENSG00000125089.17	chr4	+	-1.98	7.38	43.3	2.84e-10	1.45e-08
P4HTM	54681	protein_coding	ENSG00000178467.18	chr3	+	1.09	3.46	43.2	2.9e-10	1.48e-08
PRR30	339779	protein_coding	ENSG00000186143.11	chr2	-	2.47	-4.26	43.2	2.93e-10	1.48e-08
ZKSCAN7	55888	protein_coding	ENSG00000196345.13	chr3	+	1.9	0.323	43	3.22e-10	1.62e-08
CGNL1	84952	protein_coding	ENSG00000128849.10	chr15	+	-4.11	0.287	43	3.2e-10	1.62e-08
FAHD2B	151313	protein_coding	ENSG00000144199.11	chr2	-	1.39	1.14	42.7	3.71e-10	1.87e-08
DSTN	11034	protein_coding	ENSG00000125868.16	chr20	+	1.62	3.99	42.6	3.89e-10	1.95e-08
SPA17	53340	protein_coding	ENSG00000064199.6	chr11	+	1.84	-0.503	42.6	3.89e-10	1.95e-08
GRAMD2B	65983	protein_coding	ENSG00000155324.9	chr5	+	-2.5	1.41	42.5	3.99e-10	1.99e-08
PPA1	5464	protein_coding	ENSG00000180817.12	chr10	-	1.17	5.09	42.5	4.06e-10	2.03e-08
PLCH2	9651	protein_coding	ENSG00000149527.18	chr1	+	1.84	1.72	42.4	4.18e-10	2.08e-08
PIP4K2C	79837	protein_coding	ENSG00000166908.18	chr12	+	1.92	1.74	42.4	4.25e-10	2.11e-08
MYRIP	25924	protein_coding	ENSG00000170011.14	chr3	+	-5.08	3	42.2	4.59e-10	2.27e-08
PARVG	64098	protein_coding	ENSG00000138964.17	chr22	+	-1.32	5.96	42.1	4.74e-10	2.33e-08
LRRC20	55222	protein_coding	ENSG00000172731.14	chr10	-	1.93	1.18	42.1	4.74e-10	2.33e-08
EGR2	1959	protein_coding	ENSG00000122877.16	chr10	-	2.16	0.744	42.1	4.73e-10	2.33e-08
RIMKLA	284716	protein_coding	ENSG00000177181.15	chr1	+	2.61	-1.91	42.1	4.82e-10	2.36e-08
DOCK11	139818	protein_coding	ENSG00000147251.15	chrX	+	-1.02	7.14	42	4.94e-10	2.41e-08
AACS	65985	protein_coding	ENSG00000081760.17	chr12	+	1.28	3.14	42	4.95e-10	2.41e-08
BDH2	56898	protein_coding	ENSG00000164039.15	chr4	-	0.858	3.72	42	5.01e-10	2.44e-08
PSD3	23362	protein_coding	ENSG00000156011.17	chr8	-	-2.17	6.67	42	5.08e-10	2.47e-08
DHX32	55760	protein_coding	ENSG00000089876.11	chr10	-	1.78	1.53	41.9	5.2e-10	2.52e-08
GSAP	54103	protein_coding	ENSG00000186088.16	chr7	-	-1.96	5.51	41.7	5.64e-10	2.72e-08
CLCNKA	1187	protein_coding	ENSG00000186510.12	chr1	+	2.46	-2.66	41.7	5.76e-10	2.78e-08
IL1RAPL1	11141	protein_coding	ENSG00000169306.9	chrX	+	3.37	-3.59	41.7	5.81e-10	2.79e-08
MSH6	2956	protein_coding	ENSG00000116062.15	chr2	+	1.09	7.29	41.4	6.55e-10	3.14e-08
CYB5R2	51700	protein_coding	ENSG00000166394.15	chr11	-	-7.54	3.95	41.4	6.63e-10	3.17e-08
USP53	54532	protein_coding	ENSG00000145390.11	chr4	+	-3.81	4.18	41.3	6.74e-10	3.21e-08
BANK1	55024	protein_coding	ENSG00000153064.12	chr4	+	-2.8	7.15	41.1	7.32e-10	3.48e-08
NDUFAF4	29078	protein_coding	ENSG00000123545.6	chr6	-	1.1	2.15	41	7.61e-10	3.61e-08
PRPH	5630	protein_coding	ENSG00000135406.14	chr12	+	2.82	-3.41	40.8	8.38e-10	3.97e-08
PDE4B	5142	protein_coding	ENSG00000184588.18	chr1	+	-2.66	7.14	40.7	8.7e-10	4.11e-08
SCHIP1	29970	protein_coding	ENSG00000151967.18	chr3	+	-5	3.77	40.7	8.75e-10	4.12e-08
IRAK1BP1	134728	protein_coding	ENSG00000146243.14	chr6	+	1.32	1.61	40.7	8.86e-10	4.17e-08
ACR	49	protein_coding	ENSG00000100312.10	chr22	+	-6.16	0.637	40.6	9.39e-10	4.4e-08
KLF7	8609	protein_coding	ENSG00000118263.15	chr2	-	-2.08	6.34	40.5	9.52e-10	4.46e-08
ORC6	23594	protein_coding	ENSG00000091651.9	chr16	+	1.21	3.37	40.1	1.13e-09	5.27e-08
PHEX	5251	protein_coding	ENSG00000102174.9	chrX	+	1.68	-0.907	40.1	1.13e-09	5.29e-08
EPB41L4B	54566	protein_coding	ENSG00000095203.14	chr9	-	2.76	-1.73	40.1	1.16e-09	5.37e-08
PIK3R6	146850	protein_coding	ENSG00000276231.4	chr17	-	-2.79	2.61	40.1	1.16e-09	5.38e-08
ANKRD13B	124930	protein_coding	ENSG00000198720.13	chr17	+	1.31	2.18	40	1.2e-09	5.55e-08
MIPEP	4285	protein_coding	ENSG00000027001.10	chr13	-	1.04	1.88	39.8	1.29e-09	5.94e-08
SCN3A	6328	protein_coding	ENSG00000153253.18	chr2	-	-5.95	5.9	39.8	1.32e-09	6.05e-08
CCND2	894	protein_coding	ENSG00000118971.8	chr12	+	-2.95	6.87	39.5	1.47e-09	6.74e-08
NBPF15	284565	protein_coding	ENSG00000266338.6	chr1	-	-2.18	3.38	39.5	1.47e-09	6.74e-08
OR5P3	120066	protein_coding	ENSG00000182334.2	chr11	-	-8.1	-0.0269	39.5	1.52e-09	6.93e-08
PCCB	5096	protein_coding	ENSG00000114054.14	chr3	+	0.852	4.04	39.5	1.52e-09	6.95e-08
LRMP	4033	protein_coding	ENSG00000118308.15	chr12	+	1.57	8	39.4	1.56e-09	7.12e-08
ZNF664	144348	protein_coding	ENSG00000179195.16	chr12	+	0.98	4.86	39.3	1.61e-09	7.32e-08
ZC3H12D	340152	protein_coding	ENSG00000178199.13	chr6	-	-1.85	6.05	39.1	1.76e-09	7.97e-08
NOS2	4843	protein_coding	ENSG00000007171.17	chr17	-	-5.5	2.14	39.1	1.78e-09	8.06e-08
NCKAP5	344148	protein_coding	ENSG00000176771.17	chr2	-	3.66	3.21	39.1	1.79e-09	8.09e-08
RGS22	26166	protein_coding	ENSG00000132554.20	chr8	-	2.5	-2.91	39.1	1.8e-09	8.11e-08
CTXN1	404217	protein_coding	ENSG00000178531.6	chr19	-	2.3	-1.85	39	1.87e-09	8.41e-08
DPPA4	55211	protein_coding	ENSG00000121570.12	chr3	-	2.55	0.245	38.8	1.99e-09	8.92e-08
ARHGAP27	201176	protein_coding	ENSG00000159314.11	chr17	-	-1.33	6.68	38.8	2.04e-09	9.1e-08
ANO5	203859	protein_coding	ENSG00000171714.11	chr11	+	3.39	-0.398	38.8	2.04e-09	9.1e-08
USP43	124739	protein_coding	ENSG00000154914.17	chr17	+	1.82	3.03	38.7	2.1e-09	9.35e-08
CELSR2	1952	protein_coding	ENSG00000143126.8	chr1	+	1.49	4.05	38.7	2.11e-09	9.35e-08
CCDC187	399693	protein_coding	ENSG00000260220.6	chr9	-	2.57	1.97	38.7	2.11e-09	9.35e-08
MGAT4A	11320	protein_coding	ENSG00000071073.13	chr2	-	-1.68	6.05	38.7	2.13e-09	9.41e-08
ALG1L	200810	protein_coding	ENSG00000189366.9	chr3	-	2.44	-3.31	38.7	2.15e-09	9.49e-08
ADAMTS6	11174	protein_coding	ENSG00000049192.15	chr5	-	1.73	2.66	38.6	2.2e-09	9.67e-08
RRAS2	22800	protein_coding	ENSG00000133818.14	chr11	-	-2.15	3.36	38.6	2.25e-09	9.86e-08
C12orf42	374470	protein_coding	ENSG00000179088.14	chr12	-	-3.5	1.44	38.6	2.27e-09	9.92e-08
NFKBIZ	64332	protein_coding	ENSG00000144802.11	chr3	+	-1.85	7.64	38.5	2.37e-09	1.04e-07
RTL5	340526	protein_coding	ENSG00000242732.4	chrX	-	-3.15	0.676	38.4	2.38e-09	1.04e-07
VCL	7414	protein_coding	ENSG00000035403.17	chr10	+	-1.45	6.11	38.4	2.43e-09	1.05e-07
STON1	11037	protein_coding	ENSG00000243244.6	chr2	+	1.34	0.661	38.4	2.43e-09	1.05e-07
ZNF20	7568	protein_coding	ENSG00000132010.16	chr19	-	1.23	-0.73	38.4	2.41e-09	1.05e-07
HACD3	51495	protein_coding	ENSG00000074696.13	chr15	+	0.747	5.01	38.4	2.48e-09	1.07e-07
VSIG2	23584	protein_coding	ENSG00000019102.12	chr11	-	2.42	-1.69	38.2	2.7e-09	1.16e-07
FMO4	2329	protein_coding	ENSG00000076258.10	chr1	+	1.97	-0.425	38.1	2.74e-09	1.18e-07
WWOX	51741	protein_coding	ENSG00000186153.17	chr16	+	0.857	2.83	38.1	2.78e-09	1.19e-07
ESR1	2099	protein_coding	ENSG00000091831.23	chr6	+	1.76	0.27	38.1	2.77e-09	1.19e-07
ZNF366	167465	protein_coding	ENSG00000178175.12	chr5	-	-5.72	-1.27	38.1	2.8e-09	1.2e-07
MANEAL	149175	protein_coding	ENSG00000185090.14	chr1	+	1.63	1.26	37.9	3.03e-09	1.29e-07
LRPPRC	10128	protein_coding	ENSG00000138095.19	chr2	-	0.609	6.57	37.8	3.13e-09	1.33e-07
DNAAF1	123872	protein_coding	ENSG00000154099.18	chr16	+	2.16	-0.718	37.8	3.11e-09	1.33e-07
CRYBG1	202	protein_coding	ENSG00000112297.15	chr6	+	-1.12	6.31	37.8	3.22e-09	1.37e-07
TMEM117	84216	protein_coding	ENSG00000139173.10	chr12	+	2.1	-0.141	37.7	3.26e-09	1.38e-07
PLCH1	23007	protein_coding	ENSG00000114805.17	chr3	-	-5.29	4.01	37.7	3.33e-09	1.41e-07
ZNF286B	0	protein_coding	ENSG00000249459.9	chr17	-	1.43	0.701	37.7	3.35e-09	1.41e-07
NR2F6	2063	protein_coding	ENSG00000160113.5	chr19	-	1.4	1.35	37.7	3.38e-09	1.42e-07
NPM3	10360	protein_coding	ENSG00000107833.10	chr10	-	1.11	2.39	37.6	3.42e-09	1.43e-07
PSMA8	143471	protein_coding	ENSG00000154611.14	chr18	+	2.95	-1.48	37.6	3.44e-09	1.44e-07
ALDH4A1	8659	protein_coding	ENSG00000159423.17	chr1	-	1.04	2.75	37.5	3.55e-09	1.48e-07
PFKM	5213	protein_coding	ENSG00000152556.17	chr12	+	0.902	3.84	37.5	3.62e-09	1.51e-07
DAB2	1601	protein_coding	ENSG00000153071.15	chr5	-	-3.02	2.38	37.5	3.66e-09	1.52e-07
GCSH	2653	protein_coding	ENSG00000140905.10	chr16	-	1.7	-1.52	37.5	3.7e-09	1.53e-07
RIN2	54453	protein_coding	ENSG00000132669.13	chr20	+	-2.77	2.45	37.4	3.79e-09	1.57e-07
MEX3A	92312	protein_coding	ENSG00000254726.3	chr1	-	2.25	1.62	37.4	3.84e-09	1.59e-07
ARRB2	409	protein_coding	ENSG00000141480.18	chr17	+	-1.12	6.06	37.3	3.95e-09	1.63e-07
ELMO1	9844	protein_coding	ENSG00000155849.15	chr7	-	-1.11	5.92	37.3	3.99e-09	1.64e-07
UBE3D	90025	protein_coding	ENSG00000118420.17	chr6	-	1.08	1.26	37.3	4e-09	1.64e-07
SNX33	257364	protein_coding	ENSG00000173548.8	chr15	+	1.55	1.53	37.3	3.97e-09	1.64e-07
NABP2	79035	protein_coding	ENSG00000139579.13	chr12	+	0.937	3.3	37.3	4.03e-09	1.65e-07
ENPP2	5168	protein_coding	ENSG00000136960.12	chr8	-	-5.15	2.96	37.2	4.09e-09	1.67e-07
YBX3	8531	protein_coding	ENSG00000060138.13	chr12	-	-1.9	8.82	37.2	4.2e-09	1.71e-07
LILRA2	11027	protein_coding	ENSG00000239998.6	chr19	+	-2.06	6.26	37.1	4.32e-09	1.75e-07
VAV3	10451	protein_coding	ENSG00000134215.16	chr1	-	-1.24	6.56	37.1	4.33e-09	1.76e-07
NIPSNAP1	8508	protein_coding	ENSG00000184117.11	chr22	-	1.09	4.03	37	4.46e-09	1.81e-07
XPO5	57510	protein_coding	ENSG00000124571.18	chr6	-	0.617	4.75	37	4.51e-09	1.82e-07
GNB4	59345	protein_coding	ENSG00000114450.10	chr3	-	-1.18	5.75	37	4.56e-09	1.83e-07
DTWD2	285605	protein_coding	ENSG00000169570.10	chr5	-	1.2	0.76	37	4.56e-09	1.83e-07
PDE10A	10846	protein_coding	ENSG00000112541.14	chr6	-	3.26	-1.45	37	4.54e-09	1.83e-07
ITGB1	3688	protein_coding	ENSG00000150093.19	chr10	-	-1.16	6.38	37	4.62e-09	1.85e-07
DYNC1I1	1780	protein_coding	ENSG00000158560.14	chr7	+	3.07	-1.65	37	4.62e-09	1.85e-07
ST3GAL2	6483	protein_coding	ENSG00000157350.13	chr16	-	0.888	4.44	36.8	4.92e-09	1.96e-07
OR2AK2	391191	protein_coding	ENSG00000187080.9	chr1	+	-3.68	-1.9	36.8	5e-09	1.99e-07
SLC7A1	6541	protein_coding	ENSG00000139514.13	chr13	-	1.07	4.72	36.8	5.04e-09	2e-07
ANTXR2	118429	protein_coding	ENSG00000163297.17	chr4	-	-2.04	5.03	36.8	5.02e-09	2e-07
FAM49A	81553	protein_coding	ENSG00000197872.11	chr2	-	-2.17	6.08	36.7	5.11e-09	2.02e-07
FST	10468	protein_coding	ENSG00000134363.12	chr5	+	-4.62	-0.37	36.7	5.14e-09	2.03e-07
TGFBR1	7046	protein_coding	ENSG00000106799.13	chr9	+	-1.29	5.25	36.7	5.24e-09	2.07e-07
PPA2	27068	protein_coding	ENSG00000138777.20	chr4	-	0.647	4	36.6	5.42e-09	2.13e-07
PLA2G1B	5319	protein_coding	ENSG00000170890.14	chr12	-	2.41	-3.33	36.6	5.53e-09	2.17e-07
ANKRD44	91526	protein_coding	ENSG00000065413.20	chr2	-	-1.51	6.35	36.5	5.69e-09	2.23e-07
GNG11	2791	protein_coding	ENSG00000127920.5	chr7	+	-5.92	3.02	36.5	5.7e-09	2.23e-07
MGAT5B	146664	protein_coding	ENSG00000167889.12	chr17	+	2.1	2.5	36.4	5.91e-09	2.31e-07
RAB7B	338382	protein_coding	ENSG00000276600.5	chr1	-	2.58	-3.06	36.4	5.92e-09	2.31e-07
SORL1	6653	protein_coding	ENSG00000137642.13	chr11	+	-1.54	7.89	36.4	5.96e-09	2.32e-07
C14orf177	283598	protein_coding	ENSG00000176605.8	chr14	+	1.84	-4.44	36.4	6.02e-09	2.34e-07
CD320	51293	protein_coding	ENSG00000167775.11	chr19	-	0.97	2.8	36.3	6.08e-09	2.35e-07
IFT122	55764	protein_coding	ENSG00000163913.11	chr3	+	0.732	4.02	36.3	6.14e-09	2.38e-07
APIP	51074	protein_coding	ENSG00000149089.13	chr11	-	0.672	3.42	36.3	6.3e-09	2.43e-07
ATP6V0E2	155066	protein_coding	ENSG00000171130.18	chr7	+	1.33	2.79	36.2	6.33e-09	2.44e-07
AKAP9	10142	protein_coding	ENSG00000127914.16	chr7	+	0.913	7.57	36.2	6.41e-09	2.47e-07
TMUB2	79089	protein_coding	ENSG00000168591.16	chr17	+	-0.683	4.7	36.2	6.47e-09	2.47e-07
GRAP	10750	protein_coding	ENSG00000154016.13	chr17	-	-1.2	3.67	36.2	6.49e-09	2.47e-07
GOLGA6L9	440295	protein_coding	ENSG00000197978.9	chr15	+	1.49	1.6	36.2	6.47e-09	2.47e-07
NOTUM	147111	protein_coding	ENSG00000185269.12	chr17	-	2.42	-3.2	36.2	6.48e-09	2.47e-07
PEAK1	79834	protein_coding	ENSG00000173517.10	chr15	-	-2.18	5.9	36.2	6.6e-09	2.51e-07
PHLPP1	23239	protein_coding	ENSG00000081913.14	chr18	+	1.03	6.18	36.1	6.78e-09	2.58e-07
MTRF1L	54516	protein_coding	ENSG00000112031.16	chr6	-	0.804	3.22	36.1	6.87e-09	2.6e-07
RYK	6259	protein_coding	ENSG00000163785.12	chr3	-	-2.12	3.91	36.1	6.87e-09	2.6e-07
GRK5	2869	protein_coding	ENSG00000198873.11	chr10	+	-2.54	3.6	36	6.92e-09	2.62e-07
KPTN	11133	protein_coding	ENSG00000118162.14	chr19	-	-1.44	2.04	36	7.15e-09	2.7e-07
MEGF6	1953	protein_coding	ENSG00000162591.16	chr1	-	-2.01	5.66	35.9	7.23e-09	2.72e-07
GIMAP8	155038	protein_coding	ENSG00000171115.4	chr7	+	-2.9	2.81	35.9	7.26e-09	2.73e-07
CDR2L	30850	protein_coding	ENSG00000109089.7	chr17	+	2.15	-1.3	35.9	7.31e-09	2.74e-07
GNA11	2767	protein_coding	ENSG00000088256.9	chr19	+	-1.78	3.35	35.9	7.44e-09	2.78e-07
SIGLEC11	114132	protein_coding	ENSG00000161640.15	chr19	-	2.46	-2.23	35.9	7.48e-09	2.79e-07
PRKCB	5579	protein_coding	ENSG00000166501.14	chr16	+	-1.29	7.56	35.8	7.68e-09	2.86e-07
MACROD1	28992	protein_coding	ENSG00000133315.11	chr11	-	1.25	1.89	35.8	7.69e-09	2.86e-07
PPM1H	57460	protein_coding	ENSG00000111110.12	chr12	-	2.33	2.64	35.8	7.88e-09	2.93e-07
KIAA1147	57189	protein_coding	ENSG00000257093.7	chr7	-	-1.12	6.2	35.7	8.18e-09	3.03e-07
BAZ2B	29994	protein_coding	ENSG00000123636.18	chr2	-	-1.6	6.41	35.7	8.25e-09	3.05e-07
PLAC8	51316	protein_coding	ENSG00000145287.10	chr4	-	-1.47	5.3	35.6	8.32e-09	3.07e-07
CALCOCO2	10241	protein_coding	ENSG00000136436.14	chr17	+	-0.903	6.61	35.6	8.42e-09	3.1e-07
BIK	638	protein_coding	ENSG00000100290.3	chr22	+	2.3	1.11	35.6	8.48e-09	3.12e-07
ARAP2	116984	protein_coding	ENSG00000047365.12	chr4	-	-1.49	8.03	35.5	8.66e-09	3.18e-07
NIPA1	123606	protein_coding	ENSG00000170113.16	chr15	+	1.41	3.47	35.5	8.77e-09	3.22e-07
ITGA11	22801	protein_coding	ENSG00000137809.17	chr15	-	-2.98	0.724	35.5	8.81e-09	3.22e-07
PSEN2	5664	protein_coding	ENSG00000143801.17	chr1	+	1.94	0.817	35.5	8.91e-09	3.25e-07
DNMT3L	29947	protein_coding	ENSG00000142182.8	chr21	-	2.59	-3.09	35.5	8.89e-09	3.25e-07
OLFML2A	169611	protein_coding	ENSG00000185585.20	chr9	+	-4.38	2.36	35.4	9.12e-09	3.32e-07
PURG	29942	protein_coding	ENSG00000172733.11	chr8	-	2.67	-2.43	35.3	9.53e-09	3.46e-07
ZFYVE21	79038	protein_coding	ENSG00000100711.13	chr14	+	1.05	2.32	35.3	9.84e-09	3.57e-07
CCDC189	90835	protein_coding	ENSG00000196118.12	chr16	-	1.15	1.16	35.2	9.92e-09	3.59e-07
NAV1	89796	protein_coding	ENSG00000134369.15	chr1	+	-2.24	7.34	35.2	1e-08	3.61e-07
PCBP4	57060	protein_coding	ENSG00000090097.21	chr3	-	1.38	2.98	35.2	1.01e-08	3.64e-07
KCTD12	115207	protein_coding	ENSG00000178695.5	chr13	-	-2.89	4.52	35.1	1.05e-08	3.79e-07
EFR3A	23167	protein_coding	ENSG00000132294.15	chr8	+	-1.31	6.31	35.1	1.07e-08	3.85e-07
FXN	2395	protein_coding	ENSG00000165060.14	chr9	+	1.18	2.3	35	1.09e-08	3.9e-07
GRAMD1C	54762	protein_coding	ENSG00000178075.20	chr3	+	-2.75	3.24	35	1.11e-08	3.99e-07
FYN	2534	protein_coding	ENSG00000010810.17	chr6	-	-1.48	5.96	35	1.13e-08	4.04e-07
CYP2C8	1558	protein_coding	ENSG00000138115.14	chr10	-	1.79	-0.102	34.9	1.14e-08	4.07e-07
AGFG2	3268	protein_coding	ENSG00000106351.13	chr7	+	-2.2	3.28	34.8	1.19e-08	4.23e-07
GLT1D1	144423	protein_coding	ENSG00000151948.12	chr12	+	2.68	2.73	34.8	1.2e-08	4.27e-07
IRX1	79192	protein_coding	ENSG00000170549.4	chr5	+	-11	3.81	34.8	1.23e-08	4.36e-07
HIST2H2AC	8338	protein_coding	ENSG00000184260.5	chr1	+	1.72	4.16	34.7	1.24e-08	4.39e-07
MCRIP2	84331	protein_coding	ENSG00000172366.20	chr16	+	1.36	1.87	34.7	1.25e-08	4.42e-07
CREG2	200407	protein_coding	ENSG00000175874.10	chr2	-	-6.2	1.75	34.7	1.26e-08	4.45e-07
TMBIM1	64114	protein_coding	ENSG00000135926.15	chr2	-	-1.38	5.25	34.7	1.3e-08	4.56e-07
DCAF4	26094	protein_coding	ENSG00000119599.16	chr14	+	0.928	3.25	34.6	1.3e-08	4.56e-07
GLIPR1	11010	protein_coding	ENSG00000139278.10	chr12	+	-1.72	4.89	34.5	1.38e-08	4.82e-07
THSD7A	221981	protein_coding	ENSG00000005108.16	chr7	-	-6.34	2.97	34.5	1.38e-08	4.82e-07
TMEM132B	114795	protein_coding	ENSG00000139364.10	chr12	+	2.47	-1.5	34.5	1.37e-08	4.82e-07
POLR2D	5433	protein_coding	ENSG00000144231.11	chr2	-	0.753	4.18	34.5	1.39e-08	4.86e-07
GNAI2	2771	protein_coding	ENSG00000114353.17	chr3	+	-0.741	7.35	34.5	1.41e-08	4.9e-07
LCP2	3937	protein_coding	ENSG00000043462.12	chr5	-	-1.55	5.66	34.4	1.46e-08	5.06e-07
ZBED3	84327	protein_coding	ENSG00000132846.6	chr5	-	1.03	3.07	34.4	1.46e-08	5.08e-07
HYOU1	10525	protein_coding	ENSG00000149428.19	chr11	-	0.93	5.63	34.3	1.51e-08	5.23e-07
SLITRK3	22865	protein_coding	ENSG00000121871.4	chr3	-	2.98	-3.79	34.3	1.51e-08	5.23e-07
HGF	3082	protein_coding	ENSG00000019991.18	chr7	-	-3.64	3.61	34.3	1.53e-08	5.3e-07
EPHA10	284656	protein_coding	ENSG00000183317.17	chr1	-	2.61	-1.86	34.2	1.55e-08	5.36e-07
TMPRSS15	5651	protein_coding	ENSG00000154646.9	chr21	-	-7.87	1.69	34.2	1.57e-08	5.4e-07
KCNE3	10008	protein_coding	ENSG00000175538.10	chr11	-	-4.15	1.96	34.2	1.6e-08	5.49e-07
NAGK	55577	protein_coding	ENSG00000124357.13	chr2	+	-0.951	4.84	34.2	1.61e-08	5.53e-07
GAL3ST3	89792	protein_coding	ENSG00000175229.7	chr11	-	2.39	-3.65	34.1	1.63e-08	5.57e-07
PINX1	54984	protein_coding	ENSG00000254093.9	chr8	-	0.808	1.71	34.1	1.63e-08	5.58e-07
USP32	84669	protein_coding	ENSG00000170832.13	chr17	-	-1.16	6.01	34	1.7e-08	5.8e-07
CLEC2B	9976	protein_coding	ENSG00000110852.4	chr12	-	-2.04	6.51	34	1.74e-08	5.93e-07
RBSN	64145	protein_coding	ENSG00000131381.12	chr3	-	-0.753	4.54	33.9	1.78e-08	6.07e-07
FUT7	2529	protein_coding	ENSG00000180549.7	chr9	-	-3.02	2.29	33.9	1.82e-08	6.17e-07
PLCL2	23228	protein_coding	ENSG00000154822.18	chr3	+	1.01	5.93	33.9	1.82e-08	6.18e-07
OR5P2	120065	protein_coding	ENSG00000183303.2	chr11	-	-6.95	-0.272	33.9	1.84e-08	6.21e-07
ADCY7	113	protein_coding	ENSG00000121281.12	chr16	+	-1.77	5.36	33.8	1.88e-08	6.36e-07
MTCH2	23788	protein_coding	ENSG00000109919.10	chr11	-	0.785	4.15	33.7	2.01e-08	6.79e-07
DCTD	1635	protein_coding	ENSG00000129187.14	chr4	-	0.587	4.7	33.7	2.02e-08	6.8e-07
CNKSR2	22866	protein_coding	ENSG00000149970.16	chrX	+	-3.18	2.55	33.6	2.03e-08	6.84e-07
KSR2	283455	protein_coding	ENSG00000171435.13	chr12	-	3.25	2.13	33.6	2.05e-08	6.86e-07
CPNE2	221184	protein_coding	ENSG00000140848.17	chr16	+	-1.55	5.62	33.6	2.12e-08	7.08e-07
MLLT11	10962	protein_coding	ENSG00000213190.3	chr1	+	0.96	3.08	33.6	2.12e-08	7.08e-07
GABBR1	2550	protein_coding	ENSG00000204681.11	chr6	-	-1.71	5.15	33.5	2.15e-08	7.19e-07
PRDX4	10549	protein_coding	ENSG00000123131.13	chrX	+	1.1	2.71	33.5	2.18e-08	7.26e-07
WDR44	54521	protein_coding	ENSG00000131725.14	chrX	+	-0.857	4.12	33.5	2.19e-08	7.29e-07
ATIC	471	protein_coding	ENSG00000138363.15	chr2	+	1.01	3.78	33.5	2.2e-08	7.3e-07
PTPMT1	114971	protein_coding	ENSG00000110536.14	chr11	+	0.694	2.58	33.5	2.2e-08	7.3e-07
SETD6	79918	protein_coding	ENSG00000103037.11	chr16	+	1.23	2.22	33.5	2.23e-08	7.37e-07
TMEM63C	57156	protein_coding	ENSG00000165548.11	chr14	+	-3.73	2.8	33.4	2.27e-08	7.49e-07
GRM1	2911	protein_coding	ENSG00000152822.14	chr6	+	2.62	-3.5	33.3	2.34e-08	7.73e-07
KCNQ5	56479	protein_coding	ENSG00000185760.15	chr6	+	2.37	3.34	33.3	2.37e-08	7.79e-07
DYRK3	8444	protein_coding	ENSG00000143479.17	chr1	+	1.43	6.79	33.3	2.38e-08	7.82e-07
MDFIC	29969	protein_coding	ENSG00000135272.10	chr7	+	-2.61	4.59	33.3	2.38e-08	7.82e-07
TOMM40	10452	protein_coding	ENSG00000130204.13	chr19	+	0.753	4.21	33.3	2.43e-08	7.96e-07
ASS1	445	protein_coding	ENSG00000130707.17	chr9	+	2.92	0.385	33.2	2.46e-08	8.04e-07
PLA2G15	23659	protein_coding	ENSG00000103066.13	chr16	+	1.21	4.06	33.2	2.47e-08	8.08e-07
ARNTL	406	protein_coding	ENSG00000133794.17	chr11	+	-1.6	3.88	33.2	2.5e-08	8.15e-07
VWA8	23078	protein_coding	ENSG00000102763.18	chr13	-	1.23	4.17	33.2	2.5e-08	8.15e-07
TBC1D2	55357	protein_coding	ENSG00000095383.20	chr9	-	-1.49	2.19	33.2	2.52e-08	8.2e-07
TK2	7084	protein_coding	ENSG00000166548.15	chr16	-	-1.45	3.43	33.1	2.56e-08	8.31e-07
TBC1D7	51256	protein_coding	ENSG00000145979.18	chr6	-	0.992	3.56	33.1	2.57e-08	8.31e-07
PLSCR1	5359	protein_coding	ENSG00000188313.13	chr3	-	-1.67	4.54	33.1	2.58e-08	8.33e-07
HES2	54626	protein_coding	ENSG00000069812.11	chr1	-	2.54	-3	33.1	2.61e-08	8.43e-07
CPPED1	55313	protein_coding	ENSG00000103381.12	chr16	-	-2.08	3.03	33.1	2.65e-08	8.53e-07
HDGFL3	50810	protein_coding	ENSG00000166503.9	chr15	-	2.24	3.66	33.1	2.66e-08	8.57e-07
ODC1	4953	protein_coding	ENSG00000115758.13	chr2	-	1.32	6.69	33	2.67e-08	8.59e-07
MLC1	23209	protein_coding	ENSG00000100427.15	chr22	-	-2.81	3.52	33	2.71e-08	8.7e-07
TNFSF8	944	protein_coding	ENSG00000106952.7	chr9	-	-2.82	2.66	33	2.74e-08	8.78e-07
ARHGAP21	57584	protein_coding	ENSG00000107863.18	chr10	-	-2.3	5.73	33	2.76e-08	8.84e-07
NME1	4830	protein_coding	ENSG00000239672.7	chr17	+	1.48	2.47	32.9	2.81e-08	8.96e-07
IL16	3603	protein_coding	ENSG00000172349.17	chr15	+	-1.29	5.7	32.9	2.83e-08	9.01e-07
UNC5D	137970	protein_coding	ENSG00000156687.11	chr8	+	3.54	0.278	32.9	2.86e-08	9.11e-07
BACH2	60468	protein_coding	ENSG00000112182.15	chr6	-	1.45	6.87	32.8	3e-08	9.54e-07
SUCNR1	56670	protein_coding	ENSG00000198829.6	chr3	+	2.82	0.609	32.8	3.04e-08	9.65e-07
DENND3	22898	protein_coding	ENSG00000105339.10	chr8	+	-1.94	8.54	32.7	3.07e-08	9.71e-07
FNBP1	23048	protein_coding	ENSG00000187239.17	chr9	-	-1.36	6.78	32.7	3.07e-08	9.71e-07
ACSS1	84532	protein_coding	ENSG00000154930.15	chr20	-	-1.11	6.39	32.7	3.07e-08	9.71e-07
TM6SF1	53346	protein_coding	ENSG00000136404.15	chr15	+	2.07	-0.102	32.7	3.1e-08	9.77e-07
URB2	9816	protein_coding	ENSG00000135763.10	chr1	+	0.879	4.07	32.7	3.15e-08	9.93e-07
KCNJ9	3765	protein_coding	ENSG00000162728.5	chr1	+	2.23	-3.07	32.7	3.2e-08	1e-06
MMRN1	22915	protein_coding	ENSG00000138722.10	chr4	+	-4.27	2.83	32.6	3.21e-08	1.01e-06
MAP3K9	4293	protein_coding	ENSG00000006432.15	chr14	-	1.77	2.21	32.6	3.24e-08	1.02e-06
SFMBT2	57713	protein_coding	ENSG00000198879.11	chr10	-	-1.45	6.55	32.6	3.3e-08	1.03e-06
HES1	3280	protein_coding	ENSG00000114315.4	chr3	+	-3.98	0.591	32.6	3.28e-08	1.03e-06
SLC8B1	80024	protein_coding	ENSG00000089060.11	chr12	-	-1.31	4.26	32.6	3.33e-08	1.04e-06
FER	2241	protein_coding	ENSG00000151422.13	chr5	+	-1.83	3.75	32.5	3.38e-08	1.05e-06
ZNF433	163059	protein_coding	ENSG00000197647.11	chr19	-	1	0.386	32.5	3.41e-08	1.06e-06
MYH10	4628	protein_coding	ENSG00000133026.12	chr17	-	1.51	4.96	32.5	3.45e-08	1.07e-06
INPP5A	3632	protein_coding	ENSG00000068383.19	chr10	+	-1.5	3.54	32.4	3.52e-08	1.09e-06
HS6ST2	90161	protein_coding	ENSG00000171004.18	chrX	-	-6.76	0.581	32.4	3.53e-08	1.09e-06
FAM3C	10447	protein_coding	ENSG00000196937.11	chr7	-	1.32	4.94	32.3	3.77e-08	1.16e-06
ANAPC1	64682	protein_coding	ENSG00000153107.13	chr2	-	0.593	4.91	32.3	3.77e-08	1.16e-06
RAB9B	51209	protein_coding	ENSG00000123570.4	chrX	-	1.69	-0.0412	32.2	3.87e-08	1.19e-06
DLX5	1749	protein_coding	ENSG00000105880.7	chr7	-	2.97	-3.72	32.2	3.87e-08	1.19e-06
MGAT1	4245	protein_coding	ENSG00000131446.16	chr5	-	-0.753	6.07	32.2	3.96e-08	1.22e-06
IFNLR1	163702	protein_coding	ENSG00000185436.12	chr1	-	2.28	2.96	32.2	4e-08	1.22e-06
SLIT2	9353	protein_coding	ENSG00000145147.20	chr4	+	3.25	4.05	32.2	3.99e-08	1.22e-06
ERG	2078	protein_coding	ENSG00000157554.19	chr21	-	-2.14	7.7	32.1	4.04e-08	1.23e-06
PYCR1	5831	protein_coding	ENSG00000183010.16	chr17	-	1.89	1.95	32.1	4.15e-08	1.26e-06
PCLO	27445	protein_coding	ENSG00000186472.20	chr7	-	-7.97	4.87	32.1	4.12e-08	1.26e-06
WASHC4	23325	protein_coding	ENSG00000136051.14	chr12	+	-1.03	7.61	32.1	4.19e-08	1.27e-06
NUMB	8650	protein_coding	ENSG00000133961.20	chr14	-	-0.829	5.64	32.1	4.19e-08	1.27e-06
ADD2	119	protein_coding	ENSG00000075340.23	chr2	-	1.96	4.01	32	4.21e-08	1.28e-06
IMMP2L	83943	protein_coding	ENSG00000184903.9	chr7	-	1.11	1.32	32	4.29e-08	1.3e-06
NEU3	10825	protein_coding	ENSG00000162139.10	chr11	+	0.926	5.18	31.9	4.42e-08	1.33e-06
EVI5	7813	protein_coding	ENSG00000067208.14	chr1	-	-1.27	3.36	31.9	4.4e-08	1.33e-06
RBMS3	27303	protein_coding	ENSG00000144642.21	chr3	+	-4.15	2.13	31.9	4.41e-08	1.33e-06
APOL3	80833	protein_coding	ENSG00000128284.19	chr22	-	-1.27	5.2	31.9	4.46e-08	1.34e-06
B3GNT7	93010	protein_coding	ENSG00000156966.7	chr2	+	2.21	2.47	31.9	4.52e-08	1.35e-06
DLL3	10683	protein_coding	ENSG00000090932.10	chr19	+	2.32	-1.37	31.9	4.5e-08	1.35e-06
LHX6	26468	protein_coding	ENSG00000106852.15	chr9	-	-5.78	-0.877	31.9	4.52e-08	1.35e-06
CCDC71L	168455	protein_coding	ENSG00000253276.3	chr7	-	-1.06	3.71	31.9	4.56e-08	1.36e-06
ZCCHC18	644353	protein_coding	ENSG00000166707.11	chrX	+	1.43	-0.116	31.9	4.59e-08	1.37e-06
IL18R1	8809	protein_coding	ENSG00000115604.10	chr2	+	-3.09	2.45	31.8	4.65e-08	1.39e-06
CLPTM1L	81037	protein_coding	ENSG00000049656.14	chr5	-	0.745	5.96	31.8	4.75e-08	1.41e-06
NIT2	56954	protein_coding	ENSG00000114021.12	chr3	+	0.73	3.85	31.8	4.76e-08	1.42e-06
CSF1	1435	protein_coding	ENSG00000184371.14	chr1	+	1.9	2.25	31.8	4.78e-08	1.42e-06
PFAS	5198	protein_coding	ENSG00000178921.14	chr17	+	0.813	4.69	31.7	4.85e-08	1.44e-06
PRELID2	153768	protein_coding	ENSG00000186314.11	chr5	-	1.52	1.78	31.7	4.88e-08	1.44e-06
CAVIN4	347273	protein_coding	ENSG00000170681.6	chr9	+	1.64	-0.518	31.7	4.87e-08	1.44e-06
PSTPIP1	9051	protein_coding	ENSG00000140368.12	chr15	+	-1.54	3.53	31.7	4.95e-08	1.46e-06
SPRN	503542	protein_coding	ENSG00000203772.7	chr10	-	2.61	-1.85	31.7	5.02e-08	1.48e-06
LRRD1	401387	protein_coding	ENSG00000240720.8	chr7	-	1.44	-2.09	31.7	5.01e-08	1.48e-06
ITGAL	3683	protein_coding	ENSG00000005844.17	chr16	+	-1.6	5.81	31.6	5.09e-08	1.49e-06
NGFR	4804	protein_coding	ENSG00000064300.9	chr17	+	-5.26	1.79	31.6	5.11e-08	1.5e-06
ENOPH1	58478	protein_coding	ENSG00000145293.16	chr4	+	0.548	4.19	31.6	5.17e-08	1.51e-06
CRLF3	51379	protein_coding	ENSG00000176390.12	chr17	-	-0.752	4.86	31.6	5.17e-08	1.51e-06
ALDH18A1	5832	protein_coding	ENSG00000059573.9	chr10	-	1.26	4.52	31.6	5.15e-08	1.51e-06
SPATA24	202051	protein_coding	ENSG00000170469.10	chr5	-	0.982	-0.0568	31.6	5.17e-08	1.51e-06
TMEM217	221468	protein_coding	ENSG00000172738.12	chr6	-	-1.86	2.24	31.6	5.23e-08	1.52e-06
SOCS2	8835	protein_coding	ENSG00000120833.14	chr12	+	-3.05	8.25	31.5	5.38e-08	1.56e-06
ACTN1	87	protein_coding	ENSG00000072110.13	chr14	-	-1.88	5.94	31.5	5.42e-08	1.57e-06
MTHFD2	10797	protein_coding	ENSG00000065911.12	chr2	+	1.1	4.35	31.5	5.52e-08	1.6e-06
SPTA1	6708	protein_coding	ENSG00000163554.14	chr1	-	-2.1	6.33	31.4	5.57e-08	1.61e-06
STARD8	9754	protein_coding	ENSG00000130052.13	chrX	+	-2.94	1.41	31.4	5.55e-08	1.61e-06
FAM207A	85395	protein_coding	ENSG00000160256.13	chr21	+	1.51	1.17	31.3	5.81e-08	1.68e-06
RNF149	284996	protein_coding	ENSG00000163162.8	chr2	-	-1.2	6.23	31.3	5.99e-08	1.73e-06
PTPRO	5800	protein_coding	ENSG00000151490.14	chr12	+	-3.44	2.01	31.3	6.03e-08	1.73e-06
ABHD14A	25864	protein_coding	ENSG00000248487.9	chr3	+	1.25	-0.477	31.3	6.02e-08	1.73e-06
AC098650.1	0	protein_coding	ENSG00000283563.1	chr3	+	-4.49	-2.16	31.3	6.01e-08	1.73e-06
IL15RA	3601	protein_coding	ENSG00000134470.21	chr10	-	-1.68	2.82	31.2	6.18e-08	1.77e-06
SFRP5	6425	protein_coding	ENSG00000120057.5	chr10	-	3.31	0.713	31.2	6.26e-08	1.79e-06
SLC25A23	79085	protein_coding	ENSG00000125648.15	chr19	-	1.86	1.1	31.2	6.28e-08	1.79e-06
TNNI1	7135	protein_coding	ENSG00000159173.19	chr1	-	2.33	-3.97	31.2	6.29e-08	1.8e-06
MTMR12	54545	protein_coding	ENSG00000150712.11	chr5	-	-0.785	4.8	31.1	6.35e-08	1.81e-06
RDX	5962	protein_coding	ENSG00000137710.16	chr11	-	-1.11	5.08	31.1	6.39e-08	1.82e-06
UGT8	7368	protein_coding	ENSG00000174607.11	chr4	+	2.79	1.02	31.1	6.46e-08	1.84e-06
NUDT21	11051	protein_coding	ENSG00000167005.14	chr16	-	0.613	6.36	31	6.78e-08	1.92e-06
USP49	25862	protein_coding	ENSG00000164663.14	chr6	-	0.901	4.74	31	6.86e-08	1.94e-06
TCP10L	140290	protein_coding	ENSG00000242220.7	chr21	-	1.57	-1.33	31	6.91e-08	1.95e-06
FAM107B	83641	protein_coding	ENSG00000065809.13	chr10	-	1	7.5	30.9	7.02e-08	1.98e-06
NRG1	3084	protein_coding	ENSG00000157168.20	chr8	+	2.79	-1.99	30.9	7.01e-08	1.98e-06
AC010616.2	0	protein_coding	ENSG00000285505.1	chr19	-	1.99	-4.47	52.8	7.03e-08	1.98e-06
FRMD3	257019	protein_coding	ENSG00000172159.16	chr9	-	-1.94	1.06	30.8	7.27e-08	2.05e-06
STAG3	10734	protein_coding	ENSG00000066923.17	chr7	+	-2.95	6.37	30.8	7.45e-08	2.09e-06
PGA5	5222	protein_coding	ENSG00000256713.7	chr11	+	2.26	-3.66	30.8	7.53e-08	2.11e-06
ERICH1	157697	protein_coding	ENSG00000104714.14	chr8	-	-1.01	4.84	30.8	7.6e-08	2.13e-06
ZNF8	7554	protein_coding	ENSG00000278129.2	chr19	+	0.79	4.45	30.7	7.61e-08	2.13e-06
PRKG2	5593	protein_coding	ENSG00000138669.9	chr4	-	2.2	0.568	30.7	7.63e-08	2.13e-06
NOTCH1	4851	protein_coding	ENSG00000148400.12	chr9	-	-1.62	6.26	30.7	7.73e-08	2.15e-06
IL6R	3570	protein_coding	ENSG00000160712.13	chr1	+	-2.51	3.56	30.7	7.74e-08	2.15e-06
SYTL2	54843	protein_coding	ENSG00000137501.17	chr11	-	2.04	4.97	30.7	7.79e-08	2.17e-06
FOXL2	668	protein_coding	ENSG00000183770.7	chr3	-	2.82	-3.73	30.7	7.8e-08	2.17e-06
SYNM	23336	protein_coding	ENSG00000182253.14	chr15	+	-4.37	2.68	30.7	7.9e-08	2.19e-06
DLAT	1737	protein_coding	ENSG00000150768.15	chr11	+	0.833	3.74	30.7	7.94e-08	2.2e-06
IPP	3652	protein_coding	ENSG00000197429.10	chr1	-	1.07	0.92	30.6	8.08e-08	2.23e-06
ZNF850	342892	protein_coding	ENSG00000267041.6	chr19	-	1.08	3.17	30.6	8.2e-08	2.26e-06
KBTBD11	9920	protein_coding	ENSG00000176595.4	chr8	+	-1.81	4.3	30.6	8.23e-08	2.27e-06
ELOVL6	79071	protein_coding	ENSG00000170522.9	chr4	-	1.57	1.99	30.5	8.34e-08	2.3e-06
FAM129B	64855	protein_coding	ENSG00000136830.12	chr9	-	-1.9	2.59	30.5	8.59e-08	2.36e-06
OPTN	10133	protein_coding	ENSG00000123240.17	chr10	+	-1.48	5.66	30.5	8.66e-08	2.37e-06
SGSM3	27352	protein_coding	ENSG00000100359.21	chr22	+	0.891	1.68	30.5	8.66e-08	2.37e-06
CTDSP2	10106	protein_coding	ENSG00000175215.11	chr12	-	-0.908	6.98	30.4	8.82e-08	2.41e-06
POGLUT1	56983	protein_coding	ENSG00000163389.12	chr3	+	0.721	3.46	30.4	8.78e-08	2.41e-06
PLEKHA7	144100	protein_coding	ENSG00000166689.16	chr11	-	1.73	0.695	30.4	8.89e-08	2.43e-06
ADCY5	111	protein_coding	ENSG00000173175.14	chr3	-	2.56	-1.47	30.4	9.1e-08	2.48e-06
RASL10A	10633	protein_coding	ENSG00000100276.10	chr22	-	-2.83	0.95	30.3	9.22e-08	2.51e-06
PRSS1	5644	protein_coding	ENSG00000204983.14	chr7	+	2.93	-2.74	30.3	9.23e-08	2.51e-06
PPP3CA	5530	protein_coding	ENSG00000138814.17	chr4	-	-0.917	5.81	30.3	9.46e-08	2.56e-06
RIPK1	8737	protein_coding	ENSG00000137275.14	chr6	+	-0.668	4.87	30.3	9.42e-08	2.56e-06
PER3	8863	protein_coding	ENSG00000049246.14	chr1	+	1.45	1.58	30.3	9.42e-08	2.56e-06
NETO1	81832	protein_coding	ENSG00000166342.19	chr18	-	-6.66	3.44	30.2	9.64e-08	2.61e-06
SOWAHD	347454	protein_coding	ENSG00000187808.5	chrX	+	-2.37	1.85	30.2	9.69e-08	2.62e-06
CGREF1	10669	protein_coding	ENSG00000138028.16	chr2	-	1.97	-1.93	30.2	9.83e-08	2.65e-06
TUBA4A	7277	protein_coding	ENSG00000127824.14	chr2	-	-1.72	5.22	30.2	9.9e-08	2.67e-06
NDC1	55706	protein_coding	ENSG00000058804.12	chr1	-	0.777	4.15	30.2	9.91e-08	2.67e-06
SELENOS	55829	protein_coding	ENSG00000131871.15	chr15	-	0.672	3.33	30.1	1.01e-07	2.71e-06
TMEM273	170371	protein_coding	ENSG00000204161.14	chr10	-	-3.3	2.06	30.1	1.02e-07	2.73e-06
SPANXB1	728695	protein_coding	ENSG00000227234.2	chrX	+	-6.63	-0.997	30.1	1.04e-07	2.78e-06
TSFM	10102	protein_coding	ENSG00000123297.19	chr12	+	0.83	-0.713	30.1	1.04e-07	2.79e-06
UAP1	6675	protein_coding	ENSG00000117143.13	chr1	+	1.35	3.89	30	1.05e-07	2.8e-06
TCP11L2	255394	protein_coding	ENSG00000166046.11	chr12	+	-1.51	5.49	30	1.05e-07	2.81e-06
PLXNA1	5361	protein_coding	ENSG00000114554.11	chr3	+	-2.2	3.32	30	1.06e-07	2.82e-06
TMEM100	55273	protein_coding	ENSG00000166292.12	chr17	-	-6.67	-0.0408	30	1.08e-07	2.86e-06
MRC1	4360	protein_coding	ENSG00000260314.3	chr10	+	-3.51	3.67	30	1.08e-07	2.87e-06
KATNAL2	83473	protein_coding	ENSG00000167216.16	chr18	+	1.11	1.36	30	1.08e-07	2.87e-06
KIAA1211L	343990	protein_coding	ENSG00000196872.12	chr2	-	-4.2	-0.139	29.9	1.1e-07	2.91e-06
TREML2	79865	protein_coding	ENSG00000112195.9	chr6	-	-1.9	2.67	29.9	1.12e-07	2.95e-06
PDE4A	5141	protein_coding	ENSG00000065989.16	chr19	+	1.78	2.89	29.9	1.11e-07	2.95e-06
TCTEX1D1	200132	protein_coding	ENSG00000152760.10	chr1	+	-3.71	0.193	29.9	1.12e-07	2.95e-06
SMIM7	79086	protein_coding	ENSG00000214046.8	chr19	-	0.675	3.6	29.9	1.13e-07	2.99e-06
BMP8A	353500	protein_coding	ENSG00000183682.8	chr1	+	2.04	0.896	29.9	1.14e-07	3e-06
ZNF184	7738	protein_coding	ENSG00000096654.15	chr6	-	0.96	3.91	29.8	1.16e-07	3.04e-06
AC139530.1	5148	protein_coding	ENSG00000185527.12	chr17	-	1.3	1.21	29.8	1.16e-07	3.04e-06
CD55	1604	protein_coding	ENSG00000196352.15	chr1	+	-1.46	6.18	29.8	1.18e-07	3.09e-06
LILRB2	10288	protein_coding	ENSG00000131042.14	chr19	-	-1.87	5.38	29.8	1.18e-07	3.09e-06
UBE2G1	7326	protein_coding	ENSG00000132388.12	chr17	-	0.655	5.56	29.8	1.2e-07	3.13e-06
GSN	2934	protein_coding	ENSG00000148180.19	chr9	+	-2.06	6.6	29.7	1.21e-07	3.16e-06
SWAP70	23075	protein_coding	ENSG00000133789.15	chr11	+	-1.27	5.93	29.7	1.23e-07	3.21e-06
CHST4	10164	protein_coding	ENSG00000140835.9	chr16	+	2.2	-4.21	29.7	1.25e-07	3.26e-06
KCNS3	3790	protein_coding	ENSG00000170745.12	chr2	+	2.22	1.14	29.6	1.26e-07	3.28e-06
TBXAS1	6916	protein_coding	ENSG00000059377.17	chr7	+	-2.11	3.19	29.6	1.28e-07	3.32e-06
SIPA1L2	57568	protein_coding	ENSG00000116991.10	chr1	-	-2.8	5.59	29.6	1.29e-07	3.33e-06
TNFRSF1A	7132	protein_coding	ENSG00000067182.7	chr12	-	-1.36	4.36	29.6	1.28e-07	3.33e-06
SMARCC1	6599	protein_coding	ENSG00000173473.11	chr3	-	0.533	7.1	29.6	1.29e-07	3.35e-06
CD300A	11314	protein_coding	ENSG00000167851.14	chr17	+	-1.93	2.86	29.6	1.31e-07	3.39e-06
ELN	2006	protein_coding	ENSG00000049540.17	chr7	+	-5.38	-0.388	29.6	1.31e-07	3.39e-06
SLC2A7	155184	protein_coding	ENSG00000197241.3	chr1	-	-5.57	-0.0443	29.5	1.33e-07	3.42e-06
AC092161.1	10793	protein_coding	ENSG00000198039.11	chr7	+	0.819	3.87	29.5	1.34e-07	3.43e-06
PIK3R3	8503	protein_coding	ENSG00000117461.15	chr1	-	1.47	2.58	29.5	1.33e-07	3.43e-06
SH3BP5	9467	protein_coding	ENSG00000131370.16	chr3	-	-3.35	5.93	29.5	1.34e-07	3.45e-06
KIAA1958	158405	protein_coding	ENSG00000165185.14	chr9	+	1.28	3.82	29.5	1.36e-07	3.5e-06
MFRP	83552	protein_coding	ENSG00000235718.9	chr11	-	2.21	-3.93	29.5	1.38e-07	3.53e-06
PEG10	23089	protein_coding	ENSG00000242265.5	chr7	+	-6.93	5.21	29.4	1.39e-07	3.55e-06
CYTL1	54360	protein_coding	ENSG00000170891.11	chr4	-	-3.74	3.61	29.4	1.39e-07	3.56e-06
TDRD7	23424	protein_coding	ENSG00000196116.8	chr9	+	-0.903	4.07	29.4	1.4e-07	3.57e-06
CELF2	10659	protein_coding	ENSG00000048740.18	chr10	+	-0.87	7.75	29.4	1.43e-07	3.63e-06
EVI2B	2124	protein_coding	ENSG00000185862.7	chr17	-	-1.54	5.3	29.4	1.44e-07	3.67e-06
MAPK11	5600	protein_coding	ENSG00000185386.15	chr22	-	-1.72	2.77	29.4	1.44e-07	3.67e-06
RCN3	57333	protein_coding	ENSG00000142552.8	chr19	+	-2.53	1.93	29.4	1.44e-07	3.67e-06
PAICS	10606	protein_coding	ENSG00000128050.8	chr4	+	1.1	5.22	29.3	1.46e-07	3.7e-06
CTDSPL	10217	protein_coding	ENSG00000144677.15	chr3	+	-2.12	2.83	29.3	1.47e-07	3.71e-06
MGST3	4259	protein_coding	ENSG00000143198.13	chr1	+	1.41	2.97	29.3	1.49e-07	3.78e-06
VPS37D	155382	protein_coding	ENSG00000176428.6	chr7	+	2.47	-2.09	29.2	1.52e-07	3.84e-06
NDUFAF3	25915	protein_coding	ENSG00000178057.14	chr3	+	0.673	4.04	29.2	1.54e-07	3.89e-06
DPP6	1804	protein_coding	ENSG00000130226.17	chr7	+	3.1	-1.16	29.2	1.57e-07	3.96e-06
ZNF569	148266	protein_coding	ENSG00000196437.11	chr19	-	0.842	2.97	29.1	1.62e-07	4.08e-06
FAM13A	10144	protein_coding	ENSG00000138640.15	chr4	-	-1.9	3.39	29.1	1.64e-07	4.12e-06
ITPR1	3708	protein_coding	ENSG00000150995.19	chr3	+	-1.43	7.46	29.1	1.65e-07	4.13e-06
SCAMP2	10066	protein_coding	ENSG00000140497.16	chr15	-	-0.692	4.75	29.1	1.66e-07	4.15e-06
TMEM97	27346	protein_coding	ENSG00000109084.14	chr17	+	1.16	2.25	29	1.66e-07	4.16e-06
APAF1	317	protein_coding	ENSG00000120868.13	chr12	+	-1.08	5.71	29	1.72e-07	4.3e-06
SNCB	6620	protein_coding	ENSG00000074317.11	chr5	-	2.98	-1.9	28.9	1.8e-07	4.49e-06
SLC2A5	6518	protein_coding	ENSG00000142583.17	chr1	-	-3.09	6.36	28.8	1.83e-07	4.55e-06
NIPA2	81614	protein_coding	ENSG00000140157.14	chr15	+	0.61	5.15	28.8	1.83e-07	4.57e-06
POU4F1	5457	protein_coding	ENSG00000152192.8	chr13	-	-5.84	4.38	28.8	1.87e-07	4.64e-06
SPATA13	221178	protein_coding	ENSG00000182957.16	chr13	+	-1.42	5.04	28.8	1.89e-07	4.69e-06
MRPL19	9801	protein_coding	ENSG00000115364.14	chr2	+	0.706	3.71	28.8	1.9e-07	4.72e-06
METTL2A	339175	protein_coding	ENSG00000087995.15	chr17	+	0.726	2.08	28.8	1.9e-07	4.72e-06
DOCK8	81704	protein_coding	ENSG00000107099.15	chr9	+	-1.16	7.33	28.7	1.92e-07	4.74e-06
CYTIP	9595	protein_coding	ENSG00000115165.10	chr2	-	-1.87	6.45	28.7	1.93e-07	4.77e-06
BAG2	9532	protein_coding	ENSG00000112208.11	chr6	+	1.34	1.21	28.7	1.94e-07	4.8e-06
RECK	8434	protein_coding	ENSG00000122707.12	chr9	+	-1.5	3.83	28.7	1.96e-07	4.83e-06
CYSLTR1	10800	protein_coding	ENSG00000173198.6	chrX	-	-1.91	3	28.7	1.96e-07	4.83e-06
AC093525.2	0	protein_coding	ENSG00000260272.1	chr16	+	1.87	-4.44	40.8	1.97e-07	4.83e-06
SH2D3C	10044	protein_coding	ENSG00000095370.20	chr9	-	-1.3	5.99	28.6	2.03e-07	4.98e-06
GPR132	29933	protein_coding	ENSG00000183484.12	chr14	-	-1.42	4.54	28.6	2.04e-07	5.01e-06
GPR63	81491	protein_coding	ENSG00000112218.9	chr6	-	2.17	0.0751	28.6	2.07e-07	5.08e-06
EPSTI1	94240	protein_coding	ENSG00000133106.14	chr13	-	-2.34	4.05	28.6	2.08e-07	5.09e-06
NRN1	51299	protein_coding	ENSG00000124785.9	chr6	-	-5.52	4.04	28.5	2.09e-07	5.12e-06
THBS3	7059	protein_coding	ENSG00000169231.13	chr1	-	0.809	3.41	28.5	2.11e-07	5.15e-06
P2RY14	9934	protein_coding	ENSG00000174944.9	chr3	-	-3.91	3.23	28.5	2.14e-07	5.21e-06
EGF	1950	protein_coding	ENSG00000138798.12	chr4	+	-4.32	-0.265	28.5	2.16e-07	5.27e-06
FUCA2	2519	protein_coding	ENSG00000001036.13	chr6	-	1.55	1.32	28.4	2.19e-07	5.33e-06
TTYH2	94015	protein_coding	ENSG00000141540.11	chr17	+	-2.45	3.99	28.4	2.22e-07	5.39e-06
VANGL2	57216	protein_coding	ENSG00000162738.6	chr1	+	2.13	1.7	28.4	2.24e-07	5.43e-06
PARP14	54625	protein_coding	ENSG00000173193.15	chr3	+	-1.12	7.67	28.4	2.25e-07	5.45e-06
UTRN	7402	protein_coding	ENSG00000152818.18	chr6	+	-1.08	8.09	28.4	2.26e-07	5.47e-06
ADAMTS18	170692	protein_coding	ENSG00000140873.16	chr16	-	2.56	1.64	28.4	2.27e-07	5.49e-06
DESI2	51029	protein_coding	ENSG00000121644.19	chr1	+	0.769	5.16	28.4	2.28e-07	5.5e-06
MLKL	197259	protein_coding	ENSG00000168404.13	chr16	-	-1.21	3.37	28.4	2.28e-07	5.5e-06
LZTFL1	54585	protein_coding	ENSG00000163818.17	chr3	-	0.855	3.55	28.3	2.33e-07	5.62e-06
TRIM22	10346	protein_coding	ENSG00000132274.16	chr11	+	-1.06	7.63	28.3	2.35e-07	5.64e-06
FABP2	2169	protein_coding	ENSG00000145384.3	chr4	-	-5.28	-1.83	28.3	2.38e-07	5.72e-06
ATP5MC3	518	protein_coding	ENSG00000154518.9	chr2	-	0.786	5.12	28.3	2.4e-07	5.76e-06
NOD1	10392	protein_coding	ENSG00000106100.11	chr7	-	-1.18	4.81	28.2	2.41e-07	5.77e-06
AP1B1	162	protein_coding	ENSG00000100280.16	chr22	-	-1.29	7.15	28.2	2.44e-07	5.85e-06
BCOR	54880	protein_coding	ENSG00000183337.16	chrX	-	0.843	5.89	28.2	2.47e-07	5.91e-06
PRKDC	5591	protein_coding	ENSG00000253729.7	chr8	-	0.666	7.53	28.2	2.49e-07	5.94e-06
ZDHHC14	79683	protein_coding	ENSG00000175048.17	chr6	+	1.65	2.06	28.2	2.51e-07	5.99e-06
RANGRF	29098	protein_coding	ENSG00000108961.14	chr17	+	0.899	1.8	28.1	2.54e-07	6.01e-06
AMIGO2	347902	protein_coding	ENSG00000139211.6	chr12	-	-2.74	2.58	28.1	2.52e-07	6.01e-06
PNMA3	29944	protein_coding	ENSG00000183837.9	chrX	+	1.53	0.896	28.1	2.53e-07	6.01e-06
OSTN	344901	protein_coding	ENSG00000188729.6	chr3	+	-4.7	-2.48	28.1	2.53e-07	6.01e-06
B3GAT2	135152	protein_coding	ENSG00000112309.10	chr6	-	2.36	-1.98	28.1	2.54e-07	6.01e-06
AHR	196	protein_coding	ENSG00000106546.14	chr7	+	-2.2	5.34	28.1	2.56e-07	6.07e-06
TAGAP	117289	protein_coding	ENSG00000164691.17	chr6	-	-1.63	5.94	28.1	2.59e-07	6.13e-06
APOL2	23780	protein_coding	ENSG00000128335.14	chr22	-	-1.09	4.03	28.1	2.62e-07	6.18e-06
PTGIR	5739	protein_coding	ENSG00000160013.9	chr19	-	-2.84	-0.123	28.1	2.62e-07	6.18e-06
NDUFAF2	91942	protein_coding	ENSG00000164182.11	chr5	+	1.06	1.44	28	2.7e-07	6.37e-06
USP28	57646	protein_coding	ENSG00000048028.11	chr11	-	-1.45	5.15	28	2.73e-07	6.41e-06
ZSCAN23	222696	protein_coding	ENSG00000187987.9	chr6	-	-4.04	-0.953	28	2.73e-07	6.41e-06
APLN	8862	protein_coding	ENSG00000171388.12	chrX	-	2.02	-2.11	28	2.72e-07	6.41e-06
SNAI1	6615	protein_coding	ENSG00000124216.4	chr20	+	-2.72	4.37	28	2.74e-07	6.42e-06
MYL12B	103910	protein_coding	ENSG00000118680.13	chr18	+	0.878	6.28	27.9	2.82e-07	6.61e-06
PFKFB4	5210	protein_coding	ENSG00000114268.12	chr3	-	-1.71	2.56	27.9	2.82e-07	6.61e-06
XG	7499	protein_coding	ENSG00000124343.13	chrX	+	-3.15	0.316	27.9	2.84e-07	6.63e-06
DNAJC5G	285126	protein_coding	ENSG00000163793.12	chr2	+	2.11	-4.12	27.9	2.87e-07	6.71e-06
GABARAPL1	23710	protein_coding	ENSG00000139112.11	chr12	+	-2.21	4.58	27.8	2.9e-07	6.75e-06
SERINC5	256987	protein_coding	ENSG00000164300.17	chr5	-	-1.33	6.85	27.8	2.92e-07	6.79e-06
RPS4Y2	140032	protein_coding	ENSG00000280969.1	chrY	+	-8.43	4.01	27.8	2.94e-07	6.83e-06
SHANK3	85358	protein_coding	ENSG00000251322.8	chr22	+	-3.92	6.51	27.8	2.95e-07	6.86e-06
EQTN	54586	protein_coding	ENSG00000120160.11	chr9	-	-2.8	-2.76	27.8	3.03e-07	7.02e-06
FMO1	2326	protein_coding	ENSG00000010932.17	chr1	+	2.1	-3.12	27.7	3.08e-07	7.15e-06
BTBD1	53339	protein_coding	ENSG00000064726.9	chr15	-	0.537	5.8	27.7	3.09e-07	7.16e-06
DDX1	1653	protein_coding	ENSG00000079785.15	chr2	+	0.544	5.07	27.7	3.11e-07	7.19e-06
CHCHD3	54927	protein_coding	ENSG00000106554.13	chr7	-	0.638	4.68	27.7	3.11e-07	7.19e-06
RAB3D	9545	protein_coding	ENSG00000105514.8	chr19	-	-1.99	2.67	27.6	3.23e-07	7.45e-06
CDK6	1021	protein_coding	ENSG00000105810.9	chr7	-	-1.37	8.47	27.6	3.24e-07	7.47e-06
TNFRSF10D	8793	protein_coding	ENSG00000173530.6	chr8	-	-2.26	4.73	27.6	3.26e-07	7.48e-06
OR2B6	26212	protein_coding	ENSG00000124657.1	chr6	+	-2.67	-0.00679	27.6	3.25e-07	7.48e-06
S1PR1	1901	protein_coding	ENSG00000170989.9	chr1	+	-2.24	4.89	27.6	3.27e-07	7.5e-06
MSH2	4436	protein_coding	ENSG00000095002.14	chr2	+	0.85	4.68	27.6	3.28e-07	7.51e-06
CHST5	23563	protein_coding	ENSG00000135702.14	chr16	-	2.08	-3.92	27.6	3.28e-07	7.51e-06
SIGLEC15	284266	protein_coding	ENSG00000197046.11	chr18	+	-4.33	1.5	27.6	3.29e-07	7.54e-06
CNNM1	26507	protein_coding	ENSG00000119946.11	chr10	+	2.49	-2.24	27.5	3.33e-07	7.6e-06
HLA-F	3134	protein_coding	ENSG00000204642.14	chr6	+	-1.21	6.24	27.5	3.33e-07	7.61e-06
PRDM1	639	protein_coding	ENSG00000057657.17	chr6	+	-2.55	3.79	27.5	3.36e-07	7.66e-06
CRHBP	1393	protein_coding	ENSG00000145708.11	chr5	+	-2.68	1.5	27.5	3.37e-07	7.68e-06
WDFY2	115825	protein_coding	ENSG00000139668.9	chr13	+	-1.09	5.92	27.5	3.39e-07	7.7e-06
PTGS1	5742	protein_coding	ENSG00000095303.17	chr9	+	-1.89	3.45	27.5	3.41e-07	7.75e-06
BEND3	57673	protein_coding	ENSG00000178409.13	chr6	-	0.919	2.33	27.5	3.46e-07	7.85e-06
NOS1AP	9722	protein_coding	ENSG00000198929.13	chr1	+	-3.64	1.04	27.4	3.49e-07	7.91e-06
MRTO4	51154	protein_coding	ENSG00000053372.5	chr1	+	0.873	3.36	27.4	3.5e-07	7.92e-06
LDB2	9079	protein_coding	ENSG00000169744.13	chr4	-	-3.8	0.669	27.4	3.51e-07	7.93e-06
RNF2	6045	protein_coding	ENSG00000121481.11	chr1	+	-0.689	3.83	27.4	3.52e-07	7.95e-06
PTK2	5747	protein_coding	ENSG00000169398.19	chr8	-	-1.94	5.38	27.4	3.52e-07	7.95e-06
TMSB15B	286527	protein_coding	ENSG00000158427.15	chrX	+	0.946	-0.235	27.4	3.58e-07	8.07e-06
NKAIN3	286183	protein_coding	ENSG00000185942.11	chr8	+	2.58	-1.74	27.4	3.59e-07	8.08e-06
KDM1B	221656	protein_coding	ENSG00000165097.15	chr6	+	0.78	5.41	27.4	3.63e-07	8.15e-06
C1QTNF5	114902	protein_coding	ENSG00000223953.6	chr11	-	1.9	-4.5	66.2	3.63e-07	8.16e-06
PARD6B	84612	protein_coding	ENSG00000124171.9	chr20	+	1.03	1.4	27.3	3.67e-07	8.24e-06
ABLIM1	3983	protein_coding	ENSG00000099204.20	chr10	-	-1.83	5.45	27.3	3.7e-07	8.29e-06
PAM	5066	protein_coding	ENSG00000145730.20	chr5	+	-2.31	3.19	27.3	3.7e-07	8.29e-06
CYP2R1	120227	protein_coding	ENSG00000186104.10	chr11	-	-1.09	3.65	27.3	3.75e-07	8.39e-06
COL5A1	1289	protein_coding	ENSG00000130635.15	chr9	+	-2.65	6.73	27.3	3.81e-07	8.5e-06
RTKN2	219790	protein_coding	ENSG00000182010.11	chr10	-	1.69	1.52	27.2	3.85e-07	8.6e-06
RBM47	54502	protein_coding	ENSG00000163694.15	chr4	-	-2.64	3.64	27.2	3.88e-07	8.66e-06
AC025287.4	0	protein_coding	ENSG00000284484.1	chr16	-	1.92	-3.92	27.2	3.93e-07	8.75e-06
CUEDC1	404093	protein_coding	ENSG00000180891.13	chr17	-	-2.18	1.69	27.2	3.95e-07	8.78e-06
PLPP3	8613	protein_coding	ENSG00000162407.9	chr1	-	-3.94	0.622	27.2	3.96e-07	8.8e-06
HPRT1	3251	protein_coding	ENSG00000165704.15	chrX	+	0.834	3.77	27.1	4.05e-07	8.99e-06
OR2L2	26246	protein_coding	ENSG00000203663.4	chr1	+	-2.99	-0.834	27.1	4.05e-07	8.99e-06
SYVN1	84447	protein_coding	ENSG00000162298.18	chr11	-	0.854	6.51	27.1	4.11e-07	9.08e-06
TAFA2	338811	protein_coding	ENSG00000198673.10	chr12	-	-1.34	2.08	27.1	4.11e-07	9.08e-06
TNFAIP2	7127	protein_coding	ENSG00000185215.9	chr14	+	-1.72	5.43	27.1	4.12e-07	9.09e-06
AHCYL1	10768	protein_coding	ENSG00000168710.18	chr1	+	0.702	5.34	27.1	4.12e-07	9.09e-06
IQSEC2	23096	protein_coding	ENSG00000124313.16	chrX	-	-1.61	2.29	27.1	4.11e-07	9.09e-06
GPLD1	2822	protein_coding	ENSG00000112293.15	chr6	-	1.06	1.5	27.1	4.15e-07	9.13e-06
SCML1	6322	protein_coding	ENSG00000047634.15	chrX	+	-3.04	4.47	27.1	4.16e-07	9.14e-06
NLN	57486	protein_coding	ENSG00000123213.23	chr5	+	1.16	2.3	27.1	4.16e-07	9.14e-06
BSN	8927	protein_coding	ENSG00000164061.5	chr3	+	1.21	-1.19	27.1	4.17e-07	9.15e-06
FBXW7	55294	protein_coding	ENSG00000109670.16	chr4	-	-1.34	7.23	27.1	4.18e-07	9.17e-06
INAFM2	100505573	protein_coding	ENSG00000259330.2	chr15	+	-1.71	5.53	27	4.23e-07	9.25e-06
SLC25A30	253512	protein_coding	ENSG00000174032.17	chr13	-	-1.44	4.7	27	4.23e-07	9.25e-06
PQLC1	80148	protein_coding	ENSG00000122490.19	chr18	-	-0.95	5.15	27	4.29e-07	9.37e-06
UTP4	84916	protein_coding	ENSG00000141076.18	chr16	+	0.516	4.14	27	4.32e-07	9.44e-06
EPB41L1	2036	protein_coding	ENSG00000088367.22	chr20	+	2.13	0.127	27	4.35e-07	9.45e-06
VTN	7448	protein_coding	ENSG00000109072.14	chr17	-	1.82	-3.01	27	4.34e-07	9.45e-06
FMO3	2328	protein_coding	ENSG00000007933.13	chr1	+	2.73	-2.93	27	4.34e-07	9.45e-06
SRM	6723	protein_coding	ENSG00000116649.10	chr1	-	1.02	3.56	26.9	4.5e-07	9.77e-06
PLEC	5339	protein_coding	ENSG00000178209.15	chr8	-	-1.4	7.49	26.9	4.5e-07	9.78e-06
PPP1R14C	81706	protein_coding	ENSG00000198729.5	chr6	+	-5.01	-1.39	26.9	4.55e-07	9.86e-06
ATP8B2	57198	protein_coding	ENSG00000143515.17	chr1	+	-1.09	6.44	26.9	4.57e-07	9.89e-06
NCAM2	4685	protein_coding	ENSG00000154654.15	chr21	+	-6.52	-0.0578	26.9	4.58e-07	9.9e-06
MRTFA	57591	protein_coding	ENSG00000196588.16	chr22	-	0.764	5.17	26.8	4.73e-07	1.02e-05
FOXE3	2301	protein_coding	ENSG00000186790.6	chr1	+	2.14	-3.21	26.8	4.76e-07	1.03e-05
PA2G4	5036	protein_coding	ENSG00000170515.14	chr12	+	0.639	5.51	26.7	4.83e-07	1.04e-05
PRR5L	79899	protein_coding	ENSG00000135362.14	chr11	+	-2.54	4.37	26.7	4.84e-07	1.04e-05
LOXHD1	125336	protein_coding	ENSG00000167210.17	chr18	-	-6.42	3.37	26.8	4.81e-07	1.04e-05
NUCKS1	64710	protein_coding	ENSG00000069275.13	chr1	-	0.693	7.2	26.7	4.96e-07	1.06e-05
OXR1	55074	protein_coding	ENSG00000164830.18	chr8	+	-1.05	4.73	26.7	4.93e-07	1.06e-05
ACP6	51205	protein_coding	ENSG00000162836.12	chr1	-	1.13	2.19	26.7	4.91e-07	1.06e-05
CRIP2	1397	protein_coding	ENSG00000182809.10	chr14	+	-2.53	1.47	26.7	4.99e-07	1.07e-05
IRF4	3662	protein_coding	ENSG00000137265.15	chr6	+	1.76	6.26	26.6	5.06e-07	1.08e-05
SGCE	8910	protein_coding	ENSG00000127990.18	chr7	-	-5.01	3.06	26.6	5.11e-07	1.09e-05
TMEFF1	8577	protein_coding	ENSG00000241697.5	chr9	+	2.35	-3.42	26.6	5.08e-07	1.09e-05
MS4A14	84689	protein_coding	ENSG00000166928.10	chr11	+	-2.6	0.166	26.6	5.14e-07	1.1e-05
DST	667	protein_coding	ENSG00000151914.20	chr6	-	-3.77	3.28	26.5	5.31e-07	1.13e-05
ACSM6	142827	protein_coding	ENSG00000173124.14	chr10	+	2.02	-3.41	26.5	5.32e-07	1.13e-05
C1orf115	79762	protein_coding	ENSG00000162817.7	chr1	+	-4.43	-0.105	26.5	5.47e-07	1.16e-05
PPP5C	5536	protein_coding	ENSG00000011485.14	chr19	+	0.802	4.23	26.5	5.52e-07	1.17e-05
PPM1F	9647	protein_coding	ENSG00000100034.14	chr22	-	-1.26	6.42	26.4	5.59e-07	1.18e-05
FARSB	10056	protein_coding	ENSG00000116120.10	chr2	-	0.617	4.18	26.4	5.56e-07	1.18e-05
SMO	6608	protein_coding	ENSG00000128602.11	chr7	+	1.43	2.52	26.4	5.58e-07	1.18e-05
FGFR4	2264	protein_coding	ENSG00000160867.15	chr5	+	1.23	0.955	26.4	5.6e-07	1.18e-05
CEMIP2	23670	protein_coding	ENSG00000135048.14	chr9	-	-1.82	7.14	26.4	5.61e-07	1.19e-05
GFI1	2672	protein_coding	ENSG00000162676.12	chr1	-	1.04	5.26	26.4	5.62e-07	1.19e-05
OTULINL	54491	protein_coding	ENSG00000145569.6	chr5	+	-2.25	2.63	26.4	5.65e-07	1.19e-05
OOSP4A	0	protein_coding	ENSG00000285010.1	chr11	+	1.82	-4.44	32.5	5.67e-07	1.19e-05
UGDH	7358	protein_coding	ENSG00000109814.12	chr4	-	1.17	2.23	26.4	5.71e-07	1.2e-05
CMTM3	123920	protein_coding	ENSG00000140931.20	chr16	+	-1.56	5.11	26.4	5.78e-07	1.21e-05
FOLR2	2350	protein_coding	ENSG00000165457.14	chr11	+	-3.17	-0.0885	26.4	5.79e-07	1.21e-05
MDH2	4191	protein_coding	ENSG00000146701.12	chr7	+	0.74	5.26	26.4	5.81e-07	1.22e-05
GAS2L1	10634	protein_coding	ENSG00000185340.15	chr22	+	-2.39	0.737	26.4	5.8e-07	1.22e-05
SPATS2L	26010	protein_coding	ENSG00000196141.14	chr2	+	-3.93	4.73	26.3	5.94e-07	1.24e-05
RGS18	64407	protein_coding	ENSG00000150681.10	chr1	+	-3.89	2.85	26.3	5.99e-07	1.25e-05
GPR162	27239	protein_coding	ENSG00000250510.8	chr12	+	-4.11	0.215	26.3	6.01e-07	1.25e-05
MCF2L2	23101	protein_coding	ENSG00000053524.12	chr3	-	1.7	1.89	26.3	5.96e-07	1.25e-05
KIAA0513	9764	protein_coding	ENSG00000135709.12	chr16	+	-1.89	2.71	26.3	6.06e-07	1.26e-05
ACOT7	11332	protein_coding	ENSG00000097021.19	chr1	-	1.19	2.54	26.3	6.08e-07	1.27e-05
LYPD1	116372	protein_coding	ENSG00000150551.10	chr2	-	2.27	-3.76	26.2	6.19e-07	1.29e-05
EIF5B	9669	protein_coding	ENSG00000158417.11	chr2	+	0.683	5.18	26.2	6.25e-07	1.3e-05
MRVI1	10335	protein_coding	ENSG00000072952.18	chr11	-	-3.74	3.78	26.2	6.31e-07	1.31e-05
ACKR3	57007	protein_coding	ENSG00000144476.6	chr2	+	-3.41	1.35	26.2	6.35e-07	1.32e-05
MX1	4599	protein_coding	ENSG00000157601.14	chr21	+	-2.1	6.51	26.1	6.51e-07	1.35e-05
RCC1L	81554	protein_coding	ENSG00000274523.5	chr7	-	0.633	3.81	26.1	6.53e-07	1.35e-05
TMEM200A	114801	protein_coding	ENSG00000164484.11	chr6	+	-4.49	0.408	26.1	6.56e-07	1.35e-05
GARS	2617	protein_coding	ENSG00000106105.14	chr7	+	0.809	6.04	26.1	6.59e-07	1.36e-05
CARD6	84674	protein_coding	ENSG00000132357.14	chr5	+	-1.76	1.79	26.1	6.61e-07	1.36e-05
IL27RA	9466	protein_coding	ENSG00000104998.4	chr19	+	-1.39	3.11	26.1	6.66e-07	1.37e-05
ARHGAP20	57569	protein_coding	ENSG00000137727.12	chr11	-	1.98	-2.37	26.1	6.68e-07	1.37e-05
USP18	11274	protein_coding	ENSG00000184979.9	chr22	+	-2.01	2.35	26	6.72e-07	1.38e-05
TNFAIP8L1	126282	protein_coding	ENSG00000185361.9	chr19	+	-1.21	3.73	26	6.7e-07	1.38e-05
CHEK1	1111	protein_coding	ENSG00000149554.13	chr11	+	0.795	4.35	26	6.77e-07	1.39e-05
LZTS1	11178	protein_coding	ENSG00000061337.15	chr8	-	2.53	-0.52	26	6.82e-07	1.4e-05
SORD	6652	protein_coding	ENSG00000140263.14	chr15	+	1.21	2.51	26	6.88e-07	1.41e-05
MME	4311	protein_coding	ENSG00000196549.10	chr3	+	-2.43	9.42	25.9	7.02e-07	1.44e-05
ELFN2	114794	protein_coding	ENSG00000166897.15	chr22	-	-2.69	3.69	25.9	7.15e-07	1.46e-05
BAIAP2	10458	protein_coding	ENSG00000175866.15	chr17	+	-1.87	1.12	25.9	7.22e-07	1.47e-05
FCGRT	2217	protein_coding	ENSG00000104870.12	chr19	+	-1.59	4.99	25.8	7.39e-07	1.5e-05
HDDC2	51020	protein_coding	ENSG00000111906.17	chr6	-	0.98	3.54	25.8	7.39e-07	1.5e-05
ZC3H8	84524	protein_coding	ENSG00000144161.13	chr2	-	0.65	3.47	25.8	7.39e-07	1.5e-05
HS3ST1	9957	protein_coding	ENSG00000002587.10	chr4	-	-3.88	0.346	25.8	7.38e-07	1.5e-05
NLE1	54475	protein_coding	ENSG00000073536.18	chr17	-	0.811	2.9	25.8	7.41e-07	1.51e-05
FAM98B	283742	protein_coding	ENSG00000171262.11	chr15	+	0.878	3.58	25.8	7.55e-07	1.53e-05
SCN2A	6326	protein_coding	ENSG00000136531.16	chr2	+	-4.88	0.39	25.8	7.53e-07	1.53e-05
C7orf57	136288	protein_coding	ENSG00000164746.14	chr7	+	2.14	-2.9	25.8	7.56e-07	1.53e-05
SPAM1	6677	protein_coding	ENSG00000106304.15	chr7	+	1.83	-4.38	25.8	7.54e-07	1.53e-05
FLCN	201163	protein_coding	ENSG00000154803.13	chr17	-	-0.82	4.08	25.8	7.64e-07	1.54e-05
CYB561	1534	protein_coding	ENSG00000008283.16	chr17	-	-1.78	2.94	25.8	7.6e-07	1.54e-05
C5orf38	153571	protein_coding	ENSG00000186493.12	chr5	+	2.92	-0.344	25.8	7.68e-07	1.55e-05
NPAS4	266743	protein_coding	ENSG00000174576.10	chr11	+	2.24	-3.84	25.7	7.71e-07	1.55e-05
NPTXR	23467	protein_coding	ENSG00000221890.4	chr22	-	1.84	-1.1	25.7	7.76e-07	1.56e-05
MAP3K1	4214	protein_coding	ENSG00000095015.6	chr5	+	1.08	6.19	25.7	7.87e-07	1.58e-05
PDCL	5082	protein_coding	ENSG00000136940.13	chr9	-	-0.747	4.39	25.7	7.9e-07	1.59e-05
ALOX5AP	241	protein_coding	ENSG00000132965.9	chr13	+	-2.5	3.66	25.7	8e-07	1.6e-05
C1orf21	81563	protein_coding	ENSG00000116667.14	chr1	+	-2.38	2.25	25.7	7.98e-07	1.6e-05
ME2	4200	protein_coding	ENSG00000082212.13	chr18	+	0.628	5.41	25.6	8.07e-07	1.62e-05
PCBD1	5092	protein_coding	ENSG00000166228.9	chr10	-	1.5	0.888	25.6	8.16e-07	1.63e-05
CRACR2B	283229	protein_coding	ENSG00000177685.17	chr11	+	1.56	1.23	25.6	8.17e-07	1.63e-05
LAIR1	3903	protein_coding	ENSG00000167613.16	chr19	-	-1.37	7.44	25.6	8.21e-07	1.64e-05
FAM174B	400451	protein_coding	ENSG00000185442.13	chr15	-	-2.71	1.87	25.6	8.28e-07	1.65e-05
MTIF2	4528	protein_coding	ENSG00000085760.14	chr2	-	0.603	3.8	25.6	8.33e-07	1.66e-05
MTSS1	9788	protein_coding	ENSG00000170873.18	chr8	-	-2.28	4.66	25.6	8.4e-07	1.67e-05
FGF16	8823	protein_coding	ENSG00000196468.7	chrX	+	-4.53	0.112	25.6	8.4e-07	1.67e-05
ADCY1	107	protein_coding	ENSG00000164742.16	chr7	+	2.22	-1.36	25.5	8.51e-07	1.69e-05
NBEAL2	23218	protein_coding	ENSG00000160796.17	chr3	+	-1.35	7.77	25.5	8.83e-07	1.75e-05
AHNAK2	113146	protein_coding	ENSG00000185567.7	chr14	-	2.1	1.06	25.5	8.84e-07	1.75e-05
SYK	6850	protein_coding	ENSG00000165025.15	chr9	+	-0.854	6.95	25.4	8.9e-07	1.76e-05
C9orf72	203228	protein_coding	ENSG00000147894.15	chr9	-	-1.31	4.94	25.4	8.98e-07	1.77e-05
FAM129A	116496	protein_coding	ENSG00000135842.17	chr1	-	-2.53	4.78	25.4	8.98e-07	1.77e-05
AKT1	207	protein_coding	ENSG00000142208.16	chr14	-	0.574	6.01	25.4	9.06e-07	1.78e-05
FOLH1	2346	protein_coding	ENSG00000086205.18	chr11	-	-5.93	-1.23	25.4	9e-07	1.78e-05
PASD1	139135	protein_coding	ENSG00000166049.11	chrX	+	-4.59	-2.29	25.4	9.01e-07	1.78e-05
EFNA1	1942	protein_coding	ENSG00000169242.12	chr1	+	-2.83	2.32	25.4	9.09e-07	1.79e-05
PLD2	5338	protein_coding	ENSG00000129219.14	chr17	+	-1.09	2.75	25.3	9.33e-07	1.83e-05
PUS7	54517	protein_coding	ENSG00000091127.14	chr7	-	1.11	2.47	25.3	9.33e-07	1.83e-05
VSIR	64115	protein_coding	ENSG00000107738.20	chr10	-	-1.7	5.8	25.3	9.36e-07	1.84e-05
GAN	8139	protein_coding	ENSG00000261609.7	chr16	+	0.658	1.98	25.3	9.42e-07	1.85e-05
PACSIN2	11252	protein_coding	ENSG00000100266.19	chr22	-	-0.892	6.16	25.3	9.58e-07	1.87e-05
PDCD11	22984	protein_coding	ENSG00000148843.15	chr10	+	0.645	5.27	25.3	9.57e-07	1.87e-05
NANP	140838	protein_coding	ENSG00000170191.5	chr20	-	1.01	1.84	25.3	9.58e-07	1.87e-05
EFCAB6	64800	protein_coding	ENSG00000186976.15	chr22	-	1.83	-2.77	25.3	9.57e-07	1.87e-05
RNF41	10193	protein_coding	ENSG00000181852.17	chr12	-	0.717	4.89	25.3	9.65e-07	1.88e-05
PRPF19	27339	protein_coding	ENSG00000110107.9	chr11	-	0.604	5.42	25.3	9.69e-07	1.89e-05
STARD3	10948	protein_coding	ENSG00000131748.16	chr17	+	-0.573	5.17	25.2	9.74e-07	1.89e-05
GPI	2821	protein_coding	ENSG00000105220.17	chr19	+	0.859	5.74	25.3	9.7e-07	1.89e-05
SORBS2	8470	protein_coding	ENSG00000154556.18	chr4	-	2.87	1.79	25.3	9.7e-07	1.89e-05
ZNF467	168544	protein_coding	ENSG00000181444.13	chr7	-	-1.71	1.97	25.2	9.91e-07	1.92e-05
GLRA4	441509	protein_coding	ENSG00000188828.11	chrX	-	2.02	-3.68	25.2	9.92e-07	1.92e-05
PIK3IP1	113791	protein_coding	ENSG00000100100.12	chr22	-	-1.73	6.35	25.2	9.95e-07	1.93e-05
ELL2	22936	protein_coding	ENSG00000118985.16	chr5	-	-1.99	5.75	25.2	1.01e-06	1.94e-05
SCAP	22937	protein_coding	ENSG00000114650.20	chr3	-	0.521	5.35	25.2	1e-06	1.94e-05
RALBP1	10928	protein_coding	ENSG00000017797.13	chr18	+	0.698	5.67	25.2	1e-06	1.94e-05
CIC	23152	protein_coding	ENSG00000079432.7	chr19	+	-0.978	6.87	25.2	1.01e-06	1.95e-05
CALHM6	441168	protein_coding	ENSG00000188820.13	chr6	+	-2.21	1.32	25.2	1.01e-06	1.95e-05
AL162171.1	11099	protein_coding	ENSG00000070778.13	chr14	-	1.98	-3.02	25.2	1.01e-06	1.95e-05
QTRT1	81890	protein_coding	ENSG00000213339.9	chr19	+	0.672	3.6	25.2	1.02e-06	1.96e-05
CLIC5	53405	protein_coding	ENSG00000112782.17	chr6	-	-6.46	3.55	25.1	1.03e-06	1.99e-05
DEGS2	123099	protein_coding	ENSG00000168350.8	chr14	-	1.3	-0.772	25.1	1.04e-06	2e-05
ERMN	57471	protein_coding	ENSG00000136541.14	chr2	-	-2.92	4.17	25.1	1.05e-06	2.01e-05
KLC2	64837	protein_coding	ENSG00000174996.11	chr11	+	0.712	3.77	25.1	1.05e-06	2.01e-05
ABAT	18	protein_coding	ENSG00000183044.12	chr16	+	0.731	2.79	25.1	1.05e-06	2.01e-05
KCNK3	3777	protein_coding	ENSG00000171303.7	chr2	+	-6.41	1.55	25.1	1.06e-06	2.02e-05
TMEM144	55314	protein_coding	ENSG00000164124.10	chr4	+	-2.97	-0.00965	25.1	1.07e-06	2.04e-05
ZFAND5	7763	protein_coding	ENSG00000107372.13	chr9	-	-0.975	7.93	25	1.08e-06	2.06e-05
TOR1B	27348	protein_coding	ENSG00000136816.16	chr9	+	-1.02	3.42	25	1.09e-06	2.06e-05
CD1C	911	protein_coding	ENSG00000158481.13	chr1	+	-4.09	2.79	25	1.08e-06	2.06e-05
SETBP1	26040	protein_coding	ENSG00000152217.19	chr18	+	-2.35	4.53	25	1.08e-06	2.06e-05
CRYBG3	131544	protein_coding	ENSG00000080200.10	chr3	+	-3.04	2.08	25	1.08e-06	2.06e-05
POLD2	5425	protein_coding	ENSG00000106628.10	chr7	-	0.886	4.7	25	1.1e-06	2.08e-05
PRKRA	8575	protein_coding	ENSG00000180228.13	chr2	-	0.516	4.58	25	1.09e-06	2.08e-05
METAP1D	254042	protein_coding	ENSG00000172878.14	chr2	+	1.02	1.91	25	1.1e-06	2.08e-05
EEF1AKMT4	110599564	protein_coding	ENSG00000284753.1	chr3	+	1.44	-0.955	25	1.1e-06	2.09e-05
NAT10	55226	protein_coding	ENSG00000135372.9	chr11	+	0.603	5.35	25	1.12e-06	2.12e-05
ACP4	93650	protein_coding	ENSG00000142513.5	chr19	+	2.05	-3.44	25	1.12e-06	2.12e-05
ZSCAN1	284312	protein_coding	ENSG00000152467.9	chr19	+	2.15	-3.81	24.9	1.14e-06	2.15e-05
POLR3B	55703	protein_coding	ENSG00000013503.10	chr12	+	0.667	2.1	24.9	1.15e-06	2.18e-05
RASGRP2	10235	protein_coding	ENSG00000068831.19	chr11	-	-0.905	7.85	24.9	1.17e-06	2.21e-05
HSPD1	3329	protein_coding	ENSG00000144381.17	chr2	-	0.802	7	24.9	1.17e-06	2.21e-05
CIB4	130106	protein_coding	ENSG00000157884.11	chr2	-	-3.93	-3.04	24.9	1.17e-06	2.21e-05
PPP1R21	129285	protein_coding	ENSG00000162869.16	chr2	+	0.656	4.23	24.8	1.18e-06	2.22e-05
NDUFA4L2	56901	protein_coding	ENSG00000185633.10	chr12	-	1.41	-1.46	24.8	1.18e-06	2.22e-05
OR2L5	81466	protein_coding	ENSG00000197454.2	chr1	+	-3.48	-2.06	24.8	1.18e-06	2.22e-05
CEP68	23177	protein_coding	ENSG00000011523.14	chr2	+	-1.02	5.78	24.8	1.2e-06	2.25e-05
IL4R	3566	protein_coding	ENSG00000077238.14	chr16	+	-1.51	5.36	24.8	1.21e-06	2.26e-05
SMS	6611	protein_coding	ENSG00000102172.16	chrX	+	0.795	4.89	24.8	1.22e-06	2.28e-05
COX6C	1345	protein_coding	ENSG00000164919.11	chr8	-	0.959	5.07	24.8	1.22e-06	2.28e-05
RNASE6	6039	protein_coding	ENSG00000169413.3	chr14	+	-2.45	1.24	24.8	1.23e-06	2.3e-05
ARHGAP25	9938	protein_coding	ENSG00000163219.11	chr2	+	-0.807	5.81	24.7	1.24e-06	2.32e-05
GPATCH4	54865	protein_coding	ENSG00000160818.16	chr1	-	0.862	3.12	24.7	1.25e-06	2.33e-05
COPRS	55352	protein_coding	ENSG00000172301.11	chr17	-	0.888	1.99	24.7	1.26e-06	2.34e-05
LYST	1130	protein_coding	ENSG00000143669.13	chr1	-	-1.38	6.28	24.7	1.26e-06	2.35e-05
TXNRD3	114112	protein_coding	ENSG00000197763.16	chr3	-	-2.6	0.81	24.7	1.27e-06	2.35e-05
TOP1MT	116447	protein_coding	ENSG00000184428.12	chr8	-	0.867	4.15	24.7	1.27e-06	2.36e-05
PLPP1	8611	protein_coding	ENSG00000067113.17	chr5	-	1.07	0.496	24.7	1.28e-06	2.37e-05
SEPT11	55752	protein_coding	ENSG00000138758.11	chr4	+	0.928	4.87	24.7	1.28e-06	2.38e-05
OGG1	4968	protein_coding	ENSG00000114026.21	chr3	+	-1.28	2.81	24.7	1.29e-06	2.38e-05
ANKRD36B	57730	protein_coding	ENSG00000196912.12	chr2	-	0.86	4.16	24.6	1.29e-06	2.39e-05
ST3GAL1	6482	protein_coding	ENSG00000008513.16	chr8	-	-1.02	6.71	24.6	1.3e-06	2.4e-05
PTPRM	5797	protein_coding	ENSG00000173482.16	chr18	+	-3.67	2.42	24.6	1.31e-06	2.42e-05
BRF1	2972	protein_coding	ENSG00000185024.17	chr14	-	0.902	5.88	24.6	1.33e-06	2.45e-05
LDLR	3949	protein_coding	ENSG00000130164.13	chr19	+	-1.88	5.38	24.6	1.34e-06	2.46e-05
CDH23	64072	protein_coding	ENSG00000107736.20	chr10	+	-1.93	2.93	24.6	1.33e-06	2.46e-05
PIM1	5292	protein_coding	ENSG00000137193.14	chr6	+	-1.66	6.8	24.6	1.35e-06	2.47e-05
CAMSAP2	23271	protein_coding	ENSG00000118200.14	chr1	+	-2.9	2.07	24.5	1.37e-06	2.51e-05
PVR	5817	protein_coding	ENSG00000073008.15	chr19	+	1.92	-0.0407	24.5	1.37e-06	2.51e-05
TMEM63A	9725	protein_coding	ENSG00000196187.12	chr1	-	-0.919	5.96	24.5	1.37e-06	2.52e-05
WDFY3	23001	protein_coding	ENSG00000163625.15	chr4	-	-2.61	5.16	24.5	1.37e-06	2.52e-05
RRP15	51018	protein_coding	ENSG00000067533.6	chr1	+	0.654	3.87	24.5	1.39e-06	2.53e-05
ZSCAN9	7746	protein_coding	ENSG00000137185.12	chr6	+	1.1	2.28	24.5	1.38e-06	2.53e-05
MTFMT	123263	protein_coding	ENSG00000103707.10	chr15	-	0.677	2.16	24.5	1.39e-06	2.54e-05
TMEM266	123591	protein_coding	ENSG00000169758.13	chr15	+	1.94	-2.43	24.5	1.39e-06	2.54e-05
ETV6	2120	protein_coding	ENSG00000139083.10	chr12	+	-1.33	6.69	24.5	1.4e-06	2.55e-05
CISH	1154	protein_coding	ENSG00000114737.15	chr3	-	-3.03	3.79	24.5	1.4e-06	2.55e-05
LARP1B	55132	protein_coding	ENSG00000138709.19	chr4	+	0.681	4.06	24.5	1.41e-06	2.57e-05
DRAXIN	374946	protein_coding	ENSG00000162490.7	chr1	+	2.09	1.45	24.5	1.41e-06	2.57e-05
EPHB3	2049	protein_coding	ENSG00000182580.3	chr3	+	-3.88	0.452	24.4	1.43e-06	2.59e-05
SBK1	388228	protein_coding	ENSG00000188322.6	chr16	+	1.6	1.71	24.4	1.44e-06	2.61e-05
ID2	3398	protein_coding	ENSG00000115738.10	chr2	+	-2.04	6.94	24.4	1.45e-06	2.63e-05
ICAM5	7087	protein_coding	ENSG00000105376.5	chr19	+	-2.19	-0.765	24.4	1.45e-06	2.63e-05
FAM173A	65990	protein_coding	ENSG00000103254.10	chr16	+	1.11	1.29	24.4	1.46e-06	2.64e-05
RTL6	84247	protein_coding	ENSG00000188636.4	chr22	-	1.45	3.67	24.4	1.49e-06	2.69e-05
SMAP2	64744	protein_coding	ENSG00000084070.12	chr1	+	-1.2	7.19	24.3	1.5e-06	2.71e-05
OR7A5	26659	protein_coding	ENSG00000188269.9	chr19	-	-7.1	1.2	24.3	1.5e-06	2.71e-05
AMOTL2	51421	protein_coding	ENSG00000114019.14	chr3	-	-3.15	-1.92	24.3	1.5e-06	2.71e-05
UBA5	79876	protein_coding	ENSG00000081307.12	chr3	+	0.549	4.38	24.3	1.52e-06	2.72e-05
CD86	942	protein_coding	ENSG00000114013.16	chr3	+	-2.26	2.56	24.3	1.51e-06	2.72e-05
NIPSNAP3B	55335	protein_coding	ENSG00000165028.12	chr9	+	-1.79	3.56	24.3	1.51e-06	2.72e-05
TFEC	22797	protein_coding	ENSG00000105967.16	chr7	-	-3.76	2.9	24.3	1.51e-06	2.72e-05
CREB5	9586	protein_coding	ENSG00000146592.17	chr7	+	-3.16	3.76	24.3	1.51e-06	2.72e-05
OR2L13	284521	protein_coding	ENSG00000196071.5	chr1	+	-3.6	-1.84	24.3	1.51e-06	2.72e-05
MVP	9961	protein_coding	ENSG00000013364.19	chr16	+	-0.943	5.02	24.3	1.52e-06	2.73e-05
RXRA	6256	protein_coding	ENSG00000186350.11	chr9	+	-1.69	3.36	24.3	1.53e-06	2.75e-05
CD99	4267	protein_coding	ENSG00000002586.20_PAR_Y	chrY	+	-1.92	0.521	24.3	1.55e-06	2.77e-05
LRP2	4036	protein_coding	ENSG00000081479.15	chr2	-	3.05	-0.823	24.3	1.55e-06	2.77e-05
CACNG3	10368	protein_coding	ENSG00000006116.3	chr16	+	2.31	-3.06	24.2	1.56e-06	2.8e-05
SV2C	22987	protein_coding	ENSG00000122012.14	chr5	+	-6.09	1.57	24.2	1.62e-06	2.89e-05
GATAD1	57798	protein_coding	ENSG00000157259.8	chr7	+	0.668	3.98	24.2	1.63e-06	2.9e-05
THBS1	7057	protein_coding	ENSG00000137801.10	chr15	+	-3.76	4.4	24.1	1.64e-06	2.93e-05
NCF2	4688	protein_coding	ENSG00000116701.14	chr1	-	-2.08	5.53	24.1	1.7e-06	3.02e-05
FUCA1	2517	protein_coding	ENSG00000179163.11	chr1	-	-1.34	3.87	24.1	1.71e-06	3.03e-05
OLA1	29789	protein_coding	ENSG00000138430.16	chr2	-	0.62	5.32	24.1	1.71e-06	3.03e-05
IGSF8	93185	protein_coding	ENSG00000162729.14	chr1	-	0.814	3.13	24.1	1.7e-06	3.03e-05
CD53	963	protein_coding	ENSG00000143119.14	chr1	+	-0.796	7.18	24	1.72e-06	3.04e-05
ISG20	3669	protein_coding	ENSG00000172183.15	chr15	+	-1.38	5.53	24	1.72e-06	3.06e-05
STON2	85439	protein_coding	ENSG00000140022.13	chr14	-	-3.19	1.63	24	1.75e-06	3.09e-05
SIRPA	140885	protein_coding	ENSG00000198053.11	chr20	+	-2.34	3.44	24	1.76e-06	3.11e-05
KCNA4	3739	protein_coding	ENSG00000182255.7	chr11	-	1.95	-4.32	24	1.76e-06	3.11e-05
IQCJ-SCHIP1	100505385	protein_coding	ENSG00000283154.2	chr3	+	-2.96	0.227	24	1.77e-06	3.12e-05
SPECC1	92521	protein_coding	ENSG00000128487.16	chr17	+	-1.72	4.66	24	1.77e-06	3.13e-05
TBC1D22B	55633	protein_coding	ENSG00000065491.8	chr6	+	-0.835	5.14	24	1.78e-06	3.14e-05
USP13	8975	protein_coding	ENSG00000058056.9	chr3	+	0.885	3.66	24	1.78e-06	3.14e-05
SAMSN1	64092	protein_coding	ENSG00000155307.18	chr21	-	-2.39	4.35	24	1.79e-06	3.16e-05
TRIM54	57159	protein_coding	ENSG00000138100.13	chr2	+	1.78	-3.58	24	1.8e-06	3.16e-05
ALDH3B1	221	protein_coding	ENSG00000006534.16	chr11	+	-1.95	3.42	23.9	1.82e-06	3.19e-05
KIAA1671	85379	protein_coding	ENSG00000197077.13	chr22	+	-3.11	2.32	23.9	1.81e-06	3.19e-05
SP140	11262	protein_coding	ENSG00000079263.19	chr2	+	-2.07	3.5	23.9	1.82e-06	3.2e-05
SMIM24	284422	protein_coding	ENSG00000095932.6	chr19	-	1.38	3.61	23.9	1.84e-06	3.21e-05
SOGA1	140710	protein_coding	ENSG00000149639.15	chr20	-	0.906	5.14	23.9	1.84e-06	3.21e-05
CALU	813	protein_coding	ENSG00000128595.17	chr7	+	0.643	4.85	23.9	1.84e-06	3.22e-05
PLIN2	123	protein_coding	ENSG00000147872.10	chr9	-	-1.54	6.26	23.9	1.85e-06	3.23e-05
EIF4EBP2	1979	protein_coding	ENSG00000148730.7	chr10	+	0.551	6.19	23.9	1.87e-06	3.27e-05
IL21R	50615	protein_coding	ENSG00000103522.16	chr16	+	-1.78	3.08	23.8	1.88e-06	3.28e-05
MAMLD1	10046	protein_coding	ENSG00000013619.14	chrX	+	-2.69	2.06	23.8	1.88e-06	3.28e-05
MCF2L	23263	protein_coding	ENSG00000126217.21	chr13	+	-2.46	1.45	23.8	1.89e-06	3.29e-05
CADM4	199731	protein_coding	ENSG00000105767.3	chr19	-	1.61	-0.193	23.8	1.9e-06	3.3e-05
RNF175	285533	protein_coding	ENSG00000145428.14	chr4	-	-2.71	-0.151	23.8	1.9e-06	3.31e-05
KAZALD1	81621	protein_coding	ENSG00000107821.14	chr10	+	-2.25	2.73	23.8	1.91e-06	3.32e-05
IFNGR2	3460	protein_coding	ENSG00000159128.14	chr21	+	-1.2	5.04	23.8	1.92e-06	3.33e-05
LTV1	84946	protein_coding	ENSG00000135521.9	chr6	+	0.678	3.87	23.8	1.93e-06	3.34e-05
MCIDAS	345643	protein_coding	ENSG00000234602.7	chr5	-	2.03	-4.14	23.8	1.93e-06	3.35e-05
SLC25A15	10166	protein_coding	ENSG00000102743.15	chr13	+	0.879	2.72	23.8	1.97e-06	3.41e-05
ASTN1	460	protein_coding	ENSG00000152092.16	chr1	-	2.81	-0.0274	23.8	1.97e-06	3.41e-05
NTF3	4908	protein_coding	ENSG00000185652.12	chr12	+	-4.54	-3.38	23.8	1.99e-06	3.43e-05
INPP5D	3635	protein_coding	ENSG00000168918.14	chr2	+	-0.877	7.9	23.7	2e-06	3.45e-05
ACTR3B	57180	protein_coding	ENSG00000133627.18	chr7	+	0.74	1.08	23.7	2.02e-06	3.48e-05
GPIHBP1	338328	protein_coding	ENSG00000277494.2	chr8	+	-4.68	-3.31	23.8	2.02e-06	3.48e-05
DPYSL5	56896	protein_coding	ENSG00000157851.17	chr2	+	2.45	-3.47	23.7	2.03e-06	3.49e-05
TGFB1	7040	protein_coding	ENSG00000105329.9	chr19	-	-1.2	5.95	23.7	2.04e-06	3.51e-05
FMNL2	114793	protein_coding	ENSG00000157827.20	chr2	+	1.46	3.84	23.7	2.05e-06	3.52e-05
PCDH8	5100	protein_coding	ENSG00000136099.13	chr13	-	-4.44	-2.11	23.7	2.05e-06	3.52e-05
SMIM10	644538	protein_coding	ENSG00000184785.6	chrX	+	2.04	-0.948	23.6	2.09e-06	3.58e-05
RBM24	221662	protein_coding	ENSG00000112183.15	chr6	+	-6.18	0.329	23.6	2.12e-06	3.63e-05
SLC6A3	6531	protein_coding	ENSG00000142319.18	chr5	-	2.75	-0.701	23.6	2.12e-06	3.63e-05
NFXL1	152518	protein_coding	ENSG00000170448.12	chr4	-	0.556	2.92	23.6	2.14e-06	3.65e-05
SH3YL1	26751	protein_coding	ENSG00000035115.21	chr2	-	0.663	4.19	23.6	2.13e-06	3.65e-05
PIK3CG	5294	protein_coding	ENSG00000105851.11	chr7	+	-1.01	7.32	23.6	2.14e-06	3.66e-05
SORBS3	10174	protein_coding	ENSG00000120896.13	chr8	+	-1.43	5.35	23.6	2.16e-06	3.68e-05
HELZ2	85441	protein_coding	ENSG00000130589.16	chr20	-	-1.78	5.01	23.6	2.16e-06	3.68e-05
DAPK1	1612	protein_coding	ENSG00000196730.13	chr9	+	-3.19	5.71	23.5	2.19e-06	3.72e-05
FUT9	10690	protein_coding	ENSG00000172461.11	chr6	+	2.34	-3.85	23.5	2.18e-06	3.72e-05
PRCP	5547	protein_coding	ENSG00000137509.11	chr11	-	1.09	3.48	23.5	2.2e-06	3.74e-05
SYT5	6861	protein_coding	ENSG00000129990.15	chr19	-	2.02	-1.39	23.5	2.21e-06	3.75e-05
CNN3	1266	protein_coding	ENSG00000117519.16	chr1	-	-3.51	4.06	23.5	2.22e-06	3.77e-05
ARHGAP31	57514	protein_coding	ENSG00000031081.10	chr3	+	-1.91	1.87	23.5	2.22e-06	3.77e-05
PBK	55872	protein_coding	ENSG00000168078.10	chr8	-	1.53	1.54	23.5	2.27e-06	3.85e-05
FAT4	79633	protein_coding	ENSG00000196159.11	chr4	+	-3.25	0.471	23.4	2.29e-06	3.87e-05
GGA1	26088	protein_coding	ENSG00000100083.19	chr22	+	0.549	5.45	23.4	2.32e-06	3.92e-05
FRZB	2487	protein_coding	ENSG00000162998.5	chr2	-	-5.28	-2.57	23.4	2.34e-06	3.96e-05
AHSA1	10598	protein_coding	ENSG00000100591.8	chr14	+	0.654	4.71	23.4	2.36e-06	3.98e-05
ACVR1C	130399	protein_coding	ENSG00000123612.16	chr2	-	-4.19	1.44	23.4	2.39e-06	4.03e-05
TIFAB	497189	protein_coding	ENSG00000255833.2	chr5	-	-4.72	0.159	23.3	2.39e-06	4.04e-05
AC004551.1	4938	protein_coding	ENSG00000089127.13	chr12	+	-2.19	2.8	23.3	2.4e-06	4.05e-05
SGIP1	84251	protein_coding	ENSG00000118473.22	chr1	+	-3.23	-0.47	23.3	2.4e-06	4.05e-05
ERP29	10961	protein_coding	ENSG00000089248.7	chr12	+	0.714	6.21	23.3	2.42e-06	4.06e-05
SNX29	92017	protein_coding	ENSG00000048471.14	chr16	+	-0.826	6.04	23.3	2.41e-06	4.06e-05
MICU3	286097	protein_coding	ENSG00000155970.12	chr8	+	-3.04	0.223	23.3	2.41e-06	4.06e-05
RWDD4	201965	protein_coding	ENSG00000182552.15	chr4	-	0.649	2.89	23.3	2.43e-06	4.07e-05
IRGM	345611	protein_coding	ENSG00000237693.4	chr5	+	-2.01	2.79	23.3	2.43e-06	4.08e-05
KCNA5	3741	protein_coding	ENSG00000130037.4	chr12	+	-3.9	2.6	23.3	2.48e-06	4.15e-05
CD1D	912	protein_coding	ENSG00000158473.6	chr1	+	-2.45	0.615	23.3	2.49e-06	4.17e-05
EPB41L5	57669	protein_coding	ENSG00000115109.14	chr2	+	1.58	2.76	23.2	2.51e-06	4.19e-05
ADGRL3	23284	protein_coding	ENSG00000150471.16	chr4	+	-8.01	1.55	23.2	2.52e-06	4.21e-05
DDR2	4921	protein_coding	ENSG00000162733.18	chr1	+	1.52	-0.0208	23.2	2.53e-06	4.22e-05
KBTBD6	89890	protein_coding	ENSG00000165572.7	chr13	-	0.956	2.28	23.2	2.54e-06	4.24e-05
MICAL1	64780	protein_coding	ENSG00000135596.18	chr6	-	-0.887	7.41	23.2	2.56e-06	4.26e-05
MAPK13	5603	protein_coding	ENSG00000156711.17	chr6	+	1.02	3.82	23.2	2.58e-06	4.3e-05
KLKB1	3818	protein_coding	ENSG00000164344.16	chr4	+	1.73	-1.31	23.2	2.59e-06	4.31e-05
APP	351	protein_coding	ENSG00000142192.21	chr21	-	1.17	6.19	23.2	2.6e-06	4.32e-05
ALOX5	240	protein_coding	ENSG00000012779.11	chr10	+	-2.13	7.04	23.2	2.61e-06	4.33e-05
WIPF1	7456	protein_coding	ENSG00000115935.17	chr2	-	-0.672	7.31	23.2	2.61e-06	4.33e-05
FOXRED2	80020	protein_coding	ENSG00000100350.14	chr22	-	1.17	2.27	23.2	2.61e-06	4.33e-05
MEPCE	56257	protein_coding	ENSG00000146834.14	chr7	+	-0.809	4.67	23.2	2.62e-06	4.34e-05
ELAVL1	1994	protein_coding	ENSG00000066044.15	chr19	-	0.589	5.15	23.1	2.63e-06	4.35e-05
SPART	23111	protein_coding	ENSG00000133104.14	chr13	-	-2.37	3.63	23.1	2.67e-06	4.41e-05
CYTH4	27128	protein_coding	ENSG00000100055.21	chr22	+	-1.27	6.49	23.1	2.69e-06	4.44e-05
P3H3	10536	protein_coding	ENSG00000110811.20	chr12	+	-2.69	-1.58	23.1	2.68e-06	4.44e-05
POLR3G	10622	protein_coding	ENSG00000113356.12	chr5	+	0.962	1.06	23.1	2.7e-06	4.46e-05
ADGRE5	976	protein_coding	ENSG00000123146.20	chr19	+	-1.51	8.14	23.1	2.72e-06	4.47e-05
EMP1	2012	protein_coding	ENSG00000134531.10	chr12	+	-2.68	4.32	23.1	2.72e-06	4.47e-05
MTHFD1L	25902	protein_coding	ENSG00000120254.15	chr6	+	0.87	3.95	23.1	2.71e-06	4.47e-05
INO80C	125476	protein_coding	ENSG00000153391.15	chr18	-	-1.54	4.07	23.1	2.72e-06	4.47e-05
RIOK2	55781	protein_coding	ENSG00000058729.11	chr5	-	0.627	3.71	23.1	2.72e-06	4.47e-05
DLC1	10395	protein_coding	ENSG00000164741.15	chr8	-	-3.3	1.26	23.1	2.73e-06	4.48e-05
DDX41	51428	protein_coding	ENSG00000183258.12	chr5	-	0.686	5.86	23.1	2.74e-06	4.49e-05
F2R	2149	protein_coding	ENSG00000181104.7	chr5	+	-2.6	3.3	23.1	2.75e-06	4.5e-05
PLCD1	5333	protein_coding	ENSG00000187091.13	chr3	-	-0.932	2.55	23.1	2.74e-06	4.5e-05
DDX25	29118	protein_coding	ENSG00000109832.14	chr11	+	1.43	-1.5	23	2.79e-06	4.56e-05
CCL17	6361	protein_coding	ENSG00000102970.10	chr16	+	-6.3	3.08	23	2.81e-06	4.59e-05
KCNIP3	30818	protein_coding	ENSG00000115041.13	chr2	+	1.81	-2.87	23	2.81e-06	4.59e-05
TOMM34	10953	protein_coding	ENSG00000025772.8	chr20	-	0.652	3.75	23	2.84e-06	4.63e-05
MAP3K20	51776	protein_coding	ENSG00000091436.17	chr2	+	-1.49	4.27	23	2.84e-06	4.63e-05
MORC4	79710	protein_coding	ENSG00000133131.15	chrX	-	-2.56	1.59	23	2.85e-06	4.64e-05
CFH	3075	protein_coding	ENSG00000000971.15	chr1	+	-3.75	1.95	23	2.87e-06	4.67e-05
BAALC	79870	protein_coding	ENSG00000164929.17	chr8	+	-3.3	5.12	22.9	2.89e-06	4.7e-05
GIMAP4	55303	protein_coding	ENSG00000133574.10	chr7	+	-2.34	3.49	22.9	2.9e-06	4.7e-05
PARVB	29780	protein_coding	ENSG00000188677.14	chr22	+	-1.93	2.52	22.9	2.89e-06	4.7e-05
TMPRSS11E	28983	protein_coding	ENSG00000087128.10	chr4	+	-3.84	-2.64	22.9	2.9e-06	4.7e-05
RNF141	50862	protein_coding	ENSG00000110315.7	chr11	-	-1.23	4.59	22.9	2.96e-06	4.79e-05
ZFP1	162239	protein_coding	ENSG00000184517.12	chr16	+	0.711	3.26	22.9	2.95e-06	4.79e-05
MPP1	4354	protein_coding	ENSG00000130830.15	chrX	-	-1.27	6.57	22.9	2.97e-06	4.8e-05
TFPI	7035	protein_coding	ENSG00000003436.16	chr2	-	-4.93	3.9	22.9	2.96e-06	4.8e-05
NPHP1	4867	protein_coding	ENSG00000144061.12	chr2	-	1.51	-1.11	22.9	2.97e-06	4.8e-05
ADAM22	53616	protein_coding	ENSG00000008277.14	chr7	+	1.24	1.21	22.9	2.98e-06	4.81e-05
ADIPOR2	79602	protein_coding	ENSG00000006831.10	chr12	+	-1.07	5.84	22.9	3e-06	4.84e-05
EHD2	30846	protein_coding	ENSG00000024422.12	chr19	+	-4.4	1.5	22.9	3e-06	4.84e-05
THRA	7067	protein_coding	ENSG00000126351.12	chr17	+	0.754	4.56	22.9	3.01e-06	4.85e-05
ANKRD52	283373	protein_coding	ENSG00000139645.10	chr12	-	0.617	5.52	22.9	3.02e-06	4.87e-05
DZANK1	55184	protein_coding	ENSG00000089091.16	chr20	-	0.627	1.4	22.8	3.04e-06	4.89e-05
JAK2	3717	protein_coding	ENSG00000096968.13	chr9	+	-1	5.26	22.8	3.05e-06	4.9e-05
SNTG2	54221	protein_coding	ENSG00000172554.12	chr2	+	-2.88	0.254	22.8	3.08e-06	4.94e-05
GOT2	2806	protein_coding	ENSG00000125166.13	chr16	-	0.735	4.52	22.8	3.09e-06	4.96e-05
DOCK6	57572	protein_coding	ENSG00000130158.14	chr19	-	-4.85	1.78	22.8	3.11e-06	4.98e-05
TSPAN7	7102	protein_coding	ENSG00000156298.12	chrX	+	-2.97	3.25	22.7	3.18e-06	5.09e-05
YPEL3	83719	protein_coding	ENSG00000090238.11	chr16	-	-0.988	5.89	22.7	3.19e-06	5.1e-05
CACNA2D3	55799	protein_coding	ENSG00000157445.15	chr3	+	-4.62	-1.49	22.7	3.2e-06	5.11e-05
ADCY9	115	protein_coding	ENSG00000162104.10	chr16	-	1.09	4.63	22.7	3.2e-06	5.12e-05
ZNF566	84924	protein_coding	ENSG00000186017.14	chr19	-	0.81	2.96	22.7	3.21e-06	5.12e-05
MS4A4A	51338	protein_coding	ENSG00000110079.18	chr11	+	-2.02	0.469	22.7	3.22e-06	5.13e-05
XKR3	150165	protein_coding	ENSG00000172967.7	chr22	-	-5.04	-1.66	22.7	3.21e-06	5.13e-05
MFSD6L	162387	protein_coding	ENSG00000185156.5	chr17	-	-2.76	-1.33	22.7	3.23e-06	5.15e-05
TXNDC5	81567	protein_coding	ENSG00000239264.8	chr6	-	1.06	1.79	22.7	3.24e-06	5.16e-05
TNFSF15	9966	protein_coding	ENSG00000181634.8	chr9	-	-4.23	-1.48	22.7	3.25e-06	5.17e-05
XXYLT1	152002	protein_coding	ENSG00000173950.16	chr3	-	0.807	2.47	22.7	3.27e-06	5.19e-05
AC004151.1	23526	protein_coding	ENSG00000180448.10	chr19	+	-0.729	7.7	22.7	3.3e-06	5.23e-05
NBPF9	400818	protein_coding	ENSG00000269713.7	chr1	-	-1.2	3.27	22.7	3.3e-06	5.23e-05
AKR1C3	8644	protein_coding	ENSG00000196139.14	chr10	+	-2.37	1.58	22.7	3.32e-06	5.26e-05
RIPPLY3	53820	protein_coding	ENSG00000183145.9	chr21	+	-3.14	-0.217	22.6	3.36e-06	5.32e-05
KIF24	347240	protein_coding	ENSG00000186638.16	chr9	-	1.1	2.41	22.6	3.37e-06	5.33e-05
SLC46A1	113235	protein_coding	ENSG00000076351.13	chr17	-	1.45	-0.372	22.6	3.4e-06	5.38e-05
PDE1C	5137	protein_coding	ENSG00000154678.17	chr7	-	2.71	-1.33	22.6	3.42e-06	5.4e-05
STAB1	23166	protein_coding	ENSG00000010327.10	chr3	+	-4.48	6.75	22.6	3.44e-06	5.43e-05
LST1	7940	protein_coding	ENSG00000204482.10	chr6	+	-2.11	5.09	22.6	3.46e-06	5.45e-05
HLA-DQB2	3120	protein_coding	ENSG00000232629.9	chr6	-	-2.88	2.53	22.6	3.48e-06	5.48e-05
AC005255.1	26664	protein_coding	ENSG00000127530.3	chr19	-	-4.93	0.52	22.6	3.48e-06	5.48e-05
CD109	135228	protein_coding	ENSG00000156535.15	chr6	+	-2.36	5.08	22.6	3.49e-06	5.49e-05
FHL5	9457	protein_coding	ENSG00000112214.10	chr6	+	2.31	-3.68	22.5	3.49e-06	5.49e-05
NLRC5	84166	protein_coding	ENSG00000140853.15	chr16	+	-1.06	7.82	22.5	3.51e-06	5.51e-05
EPRS	2058	protein_coding	ENSG00000136628.18	chr1	-	0.625	5.88	22.5	3.52e-06	5.52e-05
ROBO1	6091	protein_coding	ENSG00000169855.20	chr3	-	-4.75	1.84	22.5	3.52e-06	5.52e-05
ICA1	3382	protein_coding	ENSG00000003147.19	chr7	-	-2.36	0.642	22.5	3.51e-06	5.52e-05
NRL	4901	protein_coding	ENSG00000129535.12	chr14	-	0.752	0.529	22.5	3.54e-06	5.54e-05
ARHGAP22	58504	protein_coding	ENSG00000128805.14	chr10	-	-3.73	0.878	22.5	3.55e-06	5.55e-05
NPAS1	4861	protein_coding	ENSG00000130751.9	chr19	+	1.36	-1.08	22.5	3.55e-06	5.55e-05
FOXO3B	2310	protein_coding	ENSG00000240445.4	chr17	-	1	1.7	22.5	3.58e-06	5.59e-05
SERAC1	84947	protein_coding	ENSG00000122335.17	chr6	-	1	1.53	22.5	3.58e-06	5.59e-05
OR13A1	79290	protein_coding	ENSG00000256574.7	chr10	-	-3.5	2.28	22.5	3.61e-06	5.62e-05
LIMA1	51474	protein_coding	ENSG00000050405.13	chr12	-	1.29	1.34	22.5	3.66e-06	5.7e-05
CD163	9332	protein_coding	ENSG00000177575.12	chr12	-	-3.29	1.33	22.4	3.7e-06	5.77e-05
WFS1	7466	protein_coding	ENSG00000109501.13	chr4	+	-2.77	5.07	22.4	3.72e-06	5.78e-05
SNTB1	6641	protein_coding	ENSG00000172164.15	chr8	-	1.35	3.01	22.4	3.72e-06	5.78e-05
GTPBP3	84705	protein_coding	ENSG00000130299.17	chr19	+	0.627	3.09	22.4	3.73e-06	5.8e-05
MAP3K8	1326	protein_coding	ENSG00000107968.10	chr10	+	-1.47	5.14	22.4	3.77e-06	5.85e-05
TNFSF10	8743	protein_coding	ENSG00000121858.11	chr3	-	-1.68	2.6	22.4	3.81e-06	5.91e-05
TDRD15	100129278	protein_coding	ENSG00000218819.4	chr2	+	2.36	-3.29	22.3	3.87e-06	5.99e-05
GNG2	54331	protein_coding	ENSG00000186469.8	chr14	+	-0.899	6.16	22.3	3.88e-06	6e-05
GIMAP6	474344	protein_coding	ENSG00000133561.15	chr7	-	-2.4	4.3	22.3	3.88e-06	6e-05
MTNR1A	4543	protein_coding	ENSG00000168412.6	chr4	-	2.12	-4.14	22.3	3.87e-06	6e-05
ZSWIM6	57688	protein_coding	ENSG00000130449.6	chr5	+	-1.19	5.08	22.3	3.94e-06	6.09e-05
CTHRC1	115908	protein_coding	ENSG00000164932.13	chr8	+	-3.66	2.57	22.3	3.95e-06	6.09e-05
TMEM51	55092	protein_coding	ENSG00000171729.14	chr1	+	-3.26	-1.36	22.3	3.95e-06	6.09e-05
EFEMP2	30008	protein_coding	ENSG00000172638.13	chr11	-	-1.75	2.23	22.3	3.98e-06	6.14e-05
CYGB	114757	protein_coding	ENSG00000161544.10	chr17	-	-2.75	5.44	22.3	4e-06	6.16e-05
ZFYVE9	9372	protein_coding	ENSG00000157077.14	chr1	+	1.29	3.21	22.3	4e-06	6.16e-05
FAM86B1	85002	protein_coding	ENSG00000186523.14	chr8	-	1.36	-1.94	22.3	4.03e-06	6.19e-05
RAB35	11021	protein_coding	ENSG00000111737.12	chr12	-	-0.571	4.54	22.2	4.05e-06	6.22e-05
COL24A1	255631	protein_coding	ENSG00000171502.15	chr1	-	-4.21	3.55	22.2	4.05e-06	6.22e-05
GDPD5	81544	protein_coding	ENSG00000158555.15	chr11	-	-1.18	2.96	22.2	4.05e-06	6.22e-05
STIM1	6786	protein_coding	ENSG00000167323.11	chr11	+	-0.665	6.04	22.2	4.07e-06	6.24e-05
BCAS4	55653	protein_coding	ENSG00000124243.17	chr20	+	0.907	4.41	22.2	4.11e-06	6.3e-05
CNKSR1	10256	protein_coding	ENSG00000142675.18	chr1	+	0.947	0.115	22.2	4.13e-06	6.32e-05
MPZL3	196264	protein_coding	ENSG00000160588.10	chr11	-	-1.81	1.79	22.2	4.14e-06	6.33e-05
MKNK1	8569	protein_coding	ENSG00000079277.21	chr1	-	-0.817	4.68	22.2	4.16e-06	6.36e-05
GNG12	55970	protein_coding	ENSG00000172380.6	chr1	-	-4.02	0.319	22.2	4.17e-06	6.37e-05
TENM4	26011	protein_coding	ENSG00000149256.15	chr11	-	2.52	4.97	22.2	4.19e-06	6.4e-05
PARP9	83666	protein_coding	ENSG00000138496.16	chr3	-	-1.01	5.54	22.2	4.21e-06	6.41e-05
ZFP82	284406	protein_coding	ENSG00000181007.8	chr19	-	0.848	2.87	22.2	4.21e-06	6.42e-05
MAPK10	5602	protein_coding	ENSG00000109339.22	chr4	-	-2.87	-0.108	22.1	4.23e-06	6.44e-05
TCF7L2	6934	protein_coding	ENSG00000148737.17	chr10	+	-1.45	4.41	22.1	4.29e-06	6.53e-05
HLA-E	3133	protein_coding	ENSG00000204592.9	chr6	+	-0.805	9.26	22.1	4.31e-06	6.54e-05
RFK	55312	protein_coding	ENSG00000135002.12	chr9	-	0.629	3.55	22.1	4.3e-06	6.54e-05
CORO6	84940	protein_coding	ENSG00000167549.18	chr17	-	-1.63	3	22.1	4.34e-06	6.59e-05
EPOR	2057	protein_coding	ENSG00000187266.14	chr19	-	-3.12	3.54	22.1	4.35e-06	6.6e-05
INSYN2A	642938	protein_coding	ENSG00000188916.9	chr10	-	-5	-3.1	22.2	4.38e-06	6.64e-05
CLEC14A	161198	protein_coding	ENSG00000176435.6	chr14	-	-3.75	4.49	22.1	4.41e-06	6.67e-05
TRMO	51531	protein_coding	ENSG00000136932.13	chr9	-	-0.714	3.58	22.1	4.42e-06	6.69e-05
PTPN13	5783	protein_coding	ENSG00000163629.13	chr4	+	-3.04	1.08	22.1	4.43e-06	6.69e-05
CYP51A1	1595	protein_coding	ENSG00000001630.17	chr7	-	0.909	0.109	22	4.44e-06	6.71e-05
EIF4EBP1	1978	protein_coding	ENSG00000187840.5	chr8	+	0.953	2.74	22	4.48e-06	6.76e-05
PPP1CC	5501	protein_coding	ENSG00000186298.11	chr12	-	0.547	6.76	22	4.5e-06	6.78e-05
FBXO25	26260	protein_coding	ENSG00000147364.16	chr8	+	0.977	3.75	22	4.52e-06	6.82e-05
EFNB1	1947	protein_coding	ENSG00000090776.6	chrX	+	-2.43	5.08	22	4.53e-06	6.83e-05
SEPT1	1731	protein_coding	ENSG00000180096.12	chr16	-	1.01	4.24	22	4.59e-06	6.9e-05
MRPL3	11222	protein_coding	ENSG00000114686.9	chr3	-	0.664	4.24	22	4.6e-06	6.91e-05
PPP1R9A	55607	protein_coding	ENSG00000158528.12	chr7	+	-3.93	1.2	21.9	4.66e-06	7e-05
RARS2	57038	protein_coding	ENSG00000146282.18	chr6	-	-0.52	4.21	21.9	4.67e-06	7.01e-05
KLHDC9	126823	protein_coding	ENSG00000162755.14	chr1	+	1.25	-1.56	21.9	4.67e-06	7.01e-05
CHD5	26038	protein_coding	ENSG00000116254.18	chr1	-	1.45	0.11	21.9	4.66e-06	7.01e-05
EBNA1BP2	10969	protein_coding	ENSG00000117395.12	chr1	-	0.849	3.56	21.9	4.78e-06	7.17e-05
CLUH	23277	protein_coding	ENSG00000132361.17	chr17	-	0.684	4.9	21.9	4.79e-06	7.18e-05
NLRP1	22861	protein_coding	ENSG00000091592.16	chr17	-	-0.968	7.04	21.9	4.8e-06	7.19e-05
DNAAF5	54919	protein_coding	ENSG00000164818.16	chr7	+	0.658	3.1	21.9	4.83e-06	7.22e-05
FAM50B	26240	protein_coding	ENSG00000145945.7	chr6	+	-1.92	-0.492	21.9	4.85e-06	7.25e-05
WSB1	26118	protein_coding	ENSG00000109046.15	chr17	+	-0.779	7.31	21.8	4.89e-06	7.31e-05
CALCRL	10203	protein_coding	ENSG00000064989.13	chr2	-	-4	-0.44	21.8	4.91e-06	7.33e-05
RANBP1	5902	protein_coding	ENSG00000099901.17	chr22	+	0.7	5.16	21.8	4.98e-06	7.42e-05
SMIM32	389332	protein_coding	ENSG00000271824.1	chr5	-	1.63	-4.33	21.8	4.99e-06	7.43e-05
IL1B	3553	protein_coding	ENSG00000125538.11	chr2	-	-2.29	4.45	21.8	5e-06	7.44e-05
TMEM247	388946	protein_coding	ENSG00000284701.1	chr2	+	1.72	-4.4	21.7	5.12e-06	7.61e-05
CD93	22918	protein_coding	ENSG00000125810.10	chr20	-	-2.16	3.99	21.7	5.15e-06	7.66e-05
FSTL4	23105	protein_coding	ENSG00000053108.17	chr5	-	-3.76	1.04	21.7	5.21e-06	7.74e-05
SPATA17	128153	protein_coding	ENSG00000162814.11	chr1	+	1.93	-3.31	21.7	5.23e-06	7.76e-05
NR1I3	9970	protein_coding	ENSG00000143257.11	chr1	-	1.92	-3.14	21.7	5.25e-06	7.79e-05
ZBTB7B	51043	protein_coding	ENSG00000160685.13	chr1	+	-1.55	4.14	21.7	5.27e-06	7.81e-05
SMIM10L2A	399668	protein_coding	ENSG00000178947.9	chrX	+	2.06	-1.41	21.7	5.29e-06	7.83e-05
ZFP36L1	677	protein_coding	ENSG00000185650.9	chr14	-	0.981	6.91	21.7	5.31e-06	7.86e-05
CSF3R	1441	protein_coding	ENSG00000119535.17	chr1	-	-2.64	5.86	21.6	5.42e-06	8.01e-05
SGCZ	137868	protein_coding	ENSG00000185053.14	chr8	-	-5.89	-0.933	21.6	5.44e-06	8.03e-05
GUCA1A	2978	protein_coding	ENSG00000048545.14	chr6	+	1.52	-4.42	21.6	5.46e-06	8.05e-05
ALDH9A1	223	protein_coding	ENSG00000143149.12	chr1	-	0.691	4.26	21.6	5.53e-06	8.16e-05
CHL1	10752	protein_coding	ENSG00000134121.10	chr3	+	-4.17	0.429	21.6	5.55e-06	8.19e-05
PARP11	57097	protein_coding	ENSG00000111224.14	chr12	-	-0.703	3.57	21.6	5.58e-06	8.21e-05
SEMA3D	223117	protein_coding	ENSG00000153993.13	chr7	-	-6.14	1	21.5	5.69e-06	8.37e-05
RERGL	79785	protein_coding	ENSG00000111404.6	chr12	-	-6.79	-1.34	21.5	5.73e-06	8.42e-05
MARS2	92935	protein_coding	ENSG00000247626.4	chr2	+	0.944	1.8	21.5	5.74e-06	8.43e-05
TPTEP2-CSNK1E	102800317	protein_coding	ENSG00000283900.1	chr22	-	1.72	-3.16	21.5	5.74e-06	8.43e-05
BATF	10538	protein_coding	ENSG00000156127.6	chr14	+	-1.66	1.04	21.5	5.84e-06	8.56e-05
GBE1	2632	protein_coding	ENSG00000114480.13	chr3	-	0.708	4.96	21.5	5.88e-06	8.62e-05
STOX1	219736	protein_coding	ENSG00000165730.16	chr10	+	1.26	0.751	21.5	5.88e-06	8.62e-05
TMPRSS13	84000	protein_coding	ENSG00000137747.16	chr11	-	-1.87	-1.09	21.5	5.9e-06	8.63e-05
MRPL40	64976	protein_coding	ENSG00000185608.8	chr22	+	0.767	2.21	21.4	5.92e-06	8.66e-05
PRCD	768206	protein_coding	ENSG00000214140.11	chr17	+	-1.87	2.75	21.4	5.95e-06	8.7e-05
ADGRB2	576	protein_coding	ENSG00000121753.12	chr1	-	1.79	0.146	21.4	5.95e-06	8.7e-05
ANO2	57101	protein_coding	ENSG00000047617.15	chr12	-	-4.18	0.756	21.4	6e-06	8.76e-05
C1orf226	400793	protein_coding	ENSG00000239887.6	chr1	+	-3.33	1.14	21.4	6.01e-06	8.77e-05
PTGER4	5734	protein_coding	ENSG00000171522.6	chr5	+	1.33	6.26	21.4	6.13e-06	8.93e-05
CSK	1445	protein_coding	ENSG00000103653.16	chr15	+	-0.755	6	21.3	6.36e-06	9.24e-05
MARF1	9665	protein_coding	ENSG00000166783.22	chr16	-	-0.734	6.82	21.3	6.34e-06	9.24e-05
TEKT3	64518	protein_coding	ENSG00000125409.13	chr17	-	2.03	-3.71	21.3	6.35e-06	9.24e-05
ARHGEF1	9138	protein_coding	ENSG00000076928.17	chr19	+	-0.688	7.32	21.3	6.39e-06	9.28e-05
ARMH4	145407	protein_coding	ENSG00000139971.15	chr14	-	1.78	0.67	21.3	6.39e-06	9.28e-05
PPP2R2C	5522	protein_coding	ENSG00000074211.14	chr4	-	-3.76	2.08	21.3	6.4e-06	9.29e-05
PLCB4	5332	protein_coding	ENSG00000101333.16	chr20	+	-4.9	1.62	21.3	6.42e-06	9.31e-05
INTS10	55174	protein_coding	ENSG00000104613.12	chr8	+	0.539	5.55	21.3	6.44e-06	9.33e-05
NLRP12	91662	protein_coding	ENSG00000142405.21	chr19	-	-2.76	1.57	21.3	6.48e-06	9.38e-05
P3H4	10609	protein_coding	ENSG00000141696.13	chr17	-	1.42	-0.0467	21.2	6.55e-06	9.47e-05
PDCD5	9141	protein_coding	ENSG00000105185.12	chr19	+	0.693	3.49	21.2	6.56e-06	9.48e-05
PDE9A	5152	protein_coding	ENSG00000160191.18	chr21	+	-2.93	3.38	21.2	6.57e-06	9.48e-05
KLRK1	22914	protein_coding	ENSG00000213809.9	chr12	-	-2.37	0.327	21.2	6.57e-06	9.48e-05
RASSF6	166824	protein_coding	ENSG00000169435.14	chr4	-	-4.16	-0.0157	21.2	6.56e-06	9.48e-05
CTSB	1508	protein_coding	ENSG00000164733.21	chr8	-	-1.14	6.04	21.2	6.58e-06	9.49e-05
CEP70	80321	protein_coding	ENSG00000114107.9	chr3	-	0.775	4.14	21.2	6.66e-06	9.6e-05
KBTBD13	390594	protein_coding	ENSG00000234438.4	chr15	+	2.03	-3.48	21.2	6.7e-06	9.65e-05
COPS4	51138	protein_coding	ENSG00000138663.9	chr4	+	0.45	4.13	21.2	6.73e-06	9.68e-05
UGT1A8	54576	protein_coding	ENSG00000242366.3	chr2	+	1.69	-4.44	24.3	6.76e-06	9.72e-05
ISM2	145501	protein_coding	ENSG00000100593.18	chr14	-	2.29	-0.561	21.2	6.82e-06	9.79e-05
CDH17	1015	protein_coding	ENSG00000079112.10	chr8	-	2	-3.96	21.1	6.82e-06	9.79e-05
CDS1	1040	protein_coding	ENSG00000163624.6	chr4	+	-2.85	-2.22	21.1	6.91e-06	9.91e-05
IFIT3	3437	protein_coding	ENSG00000119917.14	chr10	+	-1.89	3.89	21.1	7e-06	0.0001
SHISAL1	85352	protein_coding	ENSG00000138944.8	chr22	-	-5.73	-0.639	21.1	7e-06	0.0001
SOX5	6660	protein_coding	ENSG00000134532.18	chr12	-	1.71	-0.276	21.1	6.97e-06	0.0001
GFPT1	2673	protein_coding	ENSG00000198380.12	chr2	-	0.691	5.47	21.1	7.08e-06	0.000101
TUBB2B	347733	protein_coding	ENSG00000137285.10	chr6	-	2.18	-1.05	21.1	7.1e-06	0.000101
MORC3	23515	protein_coding	ENSG00000159256.13	chr21	+	-1.65	6.68	21.1	7.14e-06	0.000102
NUAK2	81788	protein_coding	ENSG00000163545.9	chr1	-	-1.87	3.14	21.1	7.13e-06	0.000102
CSPG4	1464	protein_coding	ENSG00000173546.7	chr15	-	2.51	1.26	21.1	7.11e-06	0.000102
C17orf64	124773	protein_coding	ENSG00000141371.13	chr17	+	-2.22	-2.75	21	7.16e-06	0.000102
PXN	5829	protein_coding	ENSG00000089159.16	chr12	-	-1.52	3.92	21	7.25e-06	0.000103
MEST	4232	protein_coding	ENSG00000106484.15	chr7	+	-1.88	2.78	21	7.22e-06	0.000103
AC092718.8	0	protein_coding	ENSG00000284512.1	chr16	-	1.58	-2.47	21	7.26e-06	0.000103
GTF2IRD1	9569	protein_coding	ENSG00000006704.10	chr7	+	1.15	2.87	21	7.33e-06	0.000104
FGD4	121512	protein_coding	ENSG00000139132.14	chr12	+	1.58	3.02	21	7.29e-06	0.000104
CCER2	643669	protein_coding	ENSG00000262484.1	chr19	-	0.991	-0.971	21	7.3e-06	0.000104
SELP	6403	protein_coding	ENSG00000174175.17	chr1	-	-2.81	0.169	21	7.29e-06	0.000104
AADACL4	343066	protein_coding	ENSG00000204518.2	chr1	+	-4.91	-3.13	21.1	7.32e-06	0.000104
PBX2	5089	protein_coding	ENSG00000204304.12	chr6	-	-0.62	5.71	21	7.42e-06	0.000105
USP15	9958	protein_coding	ENSG00000135655.16	chr12	+	-0.893	7.68	21	7.39e-06	0.000105
NPR1	4881	protein_coding	ENSG00000169418.10	chr1	+	-2.64	4.56	21	7.43e-06	0.000105
FERMT2	10979	protein_coding	ENSG00000073712.15	chr14	-	-2.84	2.85	21	7.44e-06	0.000105
FAM110A	83541	protein_coding	ENSG00000125898.13	chr20	+	-1.33	2.06	20.9	7.52e-06	0.000106
FKBP9	11328	protein_coding	ENSG00000122642.11	chr7	+	-2.59	0.943	20.9	7.55e-06	0.000106
NUDT10	170685	protein_coding	ENSG00000122824.11	chrX	+	2.21	-1.98	20.9	7.54e-06	0.000106
ITPRIPL2	162073	protein_coding	ENSG00000205730.6	chr16	+	-3.04	2.6	20.9	7.63e-06	0.000107
KCNIP1	30820	protein_coding	ENSG00000182132.13	chr5	+	-3.63	-2.9	20.9	7.56e-06	0.000107
BROX	148362	protein_coding	ENSG00000162819.12	chr1	+	-0.7	5.47	20.9	7.67e-06	0.000108
PDXK	8566	protein_coding	ENSG00000160209.19	chr21	+	-1.42	4.96	20.9	7.79e-06	0.000109
METTL2B	55798	protein_coding	ENSG00000165055.15	chr7	+	0.584	2.77	20.9	7.79e-06	0.000109
HDGF	3068	protein_coding	ENSG00000143321.19	chr1	-	0.683	7.21	20.9	7.83e-06	0.00011
STIM2	57620	protein_coding	ENSG00000109689.16	chr4	+	1.13	6.53	20.9	7.83e-06	0.00011
CCR1	1230	protein_coding	ENSG00000163823.4	chr3	-	-2.64	1.27	20.9	7.81e-06	0.00011
PLXDC1	57125	protein_coding	ENSG00000161381.14	chr17	-	-1.87	1.8	20.9	7.86e-06	0.00011
PTPRB	5787	protein_coding	ENSG00000127329.15	chr12	-	2.38	0.453	20.9	7.83e-06	0.00011
TBPL2	387332	protein_coding	ENSG00000182521.5	chr14	-	1.79	-4.16	20.9	7.81e-06	0.00011
RAB3GAP1	22930	protein_coding	ENSG00000115839.17	chr2	+	-0.525	5.74	20.8	7.96e-06	0.000111
RGMA	56963	protein_coding	ENSG00000182175.14	chr15	-	-4.71	2.8	20.8	7.95e-06	0.000111
HAS3	3038	protein_coding	ENSG00000103044.11	chr16	+	0.964	0.074	20.8	7.99e-06	0.000111
BMPR1A	657	protein_coding	ENSG00000107779.13	chr10	+	2.05	0.596	20.8	7.95e-06	0.000111
ATP5F1A	498	protein_coding	ENSG00000152234.16	chr18	-	0.482	7.5	20.8	8.08e-06	0.000112
ATP2B1	490	protein_coding	ENSG00000070961.15	chr12	-	-1.1	5.92	20.8	8.04e-06	0.000112
BCL6B	255877	protein_coding	ENSG00000161940.10	chr17	+	-2.88	4.35	20.8	8.08e-06	0.000112
KCNC4	3749	protein_coding	ENSG00000116396.14	chr1	+	1.01	1.73	20.8	8e-06	0.000112
TMEM132D	121256	protein_coding	ENSG00000151952.16	chr12	-	2.18	-3.76	20.8	8.03e-06	0.000112
JAG1	182	protein_coding	ENSG00000101384.12	chr20	-	-3.45	3.06	20.8	8.13e-06	0.000113
LUZP1	7798	protein_coding	ENSG00000169641.13	chr1	-	-1.23	6.38	20.8	8.2e-06	0.000114
SMARCB1	6598	protein_coding	ENSG00000099956.19	chr22	+	0.53	6.08	20.8	8.2e-06	0.000114
SDHA	6389	protein_coding	ENSG00000073578.17	chr5	+	0.714	4.69	20.7	8.33e-06	0.000115
EEPD1	80820	protein_coding	ENSG00000122547.11	chr7	+	-1.56	3.21	20.7	8.29e-06	0.000115
FAM47A	158724	protein_coding	ENSG00000185448.10	chrX	-	1.83	-4.22	20.7	8.3e-06	0.000115
S100A16	140576	protein_coding	ENSG00000188643.11	chr1	-	-4.37	5.03	20.7	8.37e-06	0.000116
RFC3	5983	protein_coding	ENSG00000133119.13	chr13	+	0.833	3.46	20.7	8.37e-06	0.000116
ANP32E	81611	protein_coding	ENSG00000143401.15	chr1	-	0.723	5.63	20.7	8.47e-06	0.000117
GNA12	2768	protein_coding	ENSG00000146535.14	chr7	-	-1.16	6.27	20.7	8.48e-06	0.000117
REEP3	221035	protein_coding	ENSG00000165476.14	chr10	+	-0.972	4.3	20.7	8.52e-06	0.000118
ZNF599	148103	protein_coding	ENSG00000153896.18	chr19	-	0.895	0.681	20.7	8.53e-06	0.000118
DAPK2	23604	protein_coding	ENSG00000035664.11	chr15	-	-2.44	1.88	20.7	8.58e-06	0.000118
COX5A	9377	protein_coding	ENSG00000178741.12	chr15	-	0.76	4.45	20.7	8.67e-06	0.000119
SLC12A6	9990	protein_coding	ENSG00000140199.11	chr15	-	-1.07	7.35	20.7	8.64e-06	0.000119
IL18RAP	8807	protein_coding	ENSG00000115607.9	chr2	+	-2.29	2.53	20.7	8.65e-06	0.000119
ECM1	1893	protein_coding	ENSG00000143369.15	chr1	+	-2.23	5.16	20.6	8.73e-06	0.00012
ALDH6A1	4329	protein_coding	ENSG00000119711.12	chr14	-	0.935	2.93	20.6	8.78e-06	0.00012
FLVCR2	55640	protein_coding	ENSG00000119686.10	chr14	+	-1.92	-0.208	20.6	8.76e-06	0.00012
AGO3	192669	protein_coding	ENSG00000126070.20	chr1	+	0.533	5.38	20.6	8.87e-06	0.000121
DACH1	1602	protein_coding	ENSG00000276644.5	chr13	-	-3.95	1.17	20.6	8.82e-06	0.000121
RPGRIP1L	23322	protein_coding	ENSG00000103494.14	chr16	-	0.815	2.16	20.6	8.87e-06	0.000121
LAMP3	27074	protein_coding	ENSG00000078081.8	chr3	-	1.77	-1	20.6	8.82e-06	0.000121
SLC25A41	284427	protein_coding	ENSG00000181240.13	chr19	-	1.84	-3.42	20.6	8.79e-06	0.000121
SERBP1	26135	protein_coding	ENSG00000142864.14	chr1	-	0.482	7.49	20.6	8.92e-06	0.000122
TIMM29	90580	protein_coding	ENSG00000142444.7	chr19	+	0.605	3.02	20.6	8.95e-06	0.000122
METRN	79006	protein_coding	ENSG00000103260.9	chr16	+	1.11	0.842	20.6	8.91e-06	0.000122
AIFM2	84883	protein_coding	ENSG00000042286.15	chr10	-	0.834	1.53	20.6	9.02e-06	0.000123
C1QBP	708	protein_coding	ENSG00000108561.8	chr17	-	0.816	5.19	20.5	9.1e-06	0.000124
ASCL5	647219	protein_coding	ENSG00000232237.3	chr1	-	1.83	-3.39	20.6	9.07e-06	0.000124
KSR1	8844	protein_coding	ENSG00000141068.14	chr17	+	-1.33	5.19	20.5	9.17e-06	0.000125
MTX2	10651	protein_coding	ENSG00000128654.14	chr2	+	1.45	1.78	20.5	9.18e-06	0.000125
LRRC1	55227	protein_coding	ENSG00000137269.15	chr6	+	1.12	1.94	20.5	9.18e-06	0.000125
TM4SF1	4071	protein_coding	ENSG00000169908.12	chr3	-	-5.77	-0.639	20.5	9.19e-06	0.000125
GDPD4	220032	protein_coding	ENSG00000178795.9	chr11	-	-3.54	-1.42	20.5	9.22e-06	0.000125
TMC8	147138	protein_coding	ENSG00000167895.14	chr17	+	-1.05	6.42	20.5	9.31e-06	0.000126
FHAD1	114827	protein_coding	ENSG00000142621.19	chr1	+	-2.64	-0.211	20.5	9.32e-06	0.000126
CHST2	9435	protein_coding	ENSG00000175040.6	chr3	+	-1.99	3.72	20.5	9.45e-06	0.000128
NDFIP2	54602	protein_coding	ENSG00000102471.14	chr13	+	-2.46	0.684	20.5	9.42e-06	0.000128
FAM153CP	0	protein_coding	ENSG00000204677.12	chr5	+	1.25	0.795	20.5	9.5e-06	0.000128
STAT3	6774	protein_coding	ENSG00000168610.14	chr17	-	-0.853	6.12	20.5	9.51e-06	0.000129
SLC45A3	85414	protein_coding	ENSG00000158715.6	chr1	-	-2.53	2.88	20.4	9.65e-06	0.00013
KANK1	23189	protein_coding	ENSG00000107104.18	chr9	+	-3.37	3.34	20.4	9.6e-06	0.00013
ICA1L	130026	protein_coding	ENSG00000163596.16	chr2	-	0.93	2.21	20.4	9.59e-06	0.00013
ASGR2	433	protein_coding	ENSG00000161944.16	chr17	-	-3.1	-1.07	20.4	9.66e-06	0.00013
IL10RA	3587	protein_coding	ENSG00000110324.10	chr11	+	-1.76	5.14	20.4	9.69e-06	0.000131
CCDC166	100130274	protein_coding	ENSG00000255181.3	chr8	-	1.55	-4.36	20.4	9.72e-06	0.000131
FH	2271	protein_coding	ENSG00000091483.6	chr1	-	0.797	3.81	20.4	9.84e-06	0.000132
MRPL11	65003	protein_coding	ENSG00000174547.13	chr11	-	0.778	3.5	20.4	9.85e-06	0.000132
PLPP2	8612	protein_coding	ENSG00000141934.10	chr19	-	1.61	-0.829	20.4	9.8e-06	0.000132
LRRC58	116064	protein_coding	ENSG00000163428.4	chr3	-	0.748	5.35	20.4	9.94e-06	0.000133
FABP5	2171	protein_coding	ENSG00000164687.11	chr8	+	1.04	2.92	20.4	9.89e-06	0.000133
NLK	51701	protein_coding	ENSG00000087095.13	chr17	+	0.672	4.38	20.4	9.94e-06	0.000133
SLC25A13	10165	protein_coding	ENSG00000004864.13	chr7	-	0.537	3.54	20.4	9.97e-06	0.000133
PGBD1	84547	protein_coding	ENSG00000137338.5	chr6	+	0.636	2.43	20.4	9.93e-06	0.000133
SMYD3	64754	protein_coding	ENSG00000185420.19	chr1	-	0.727	3.22	20.4	1e-05	0.000133
C2orf76	130355	protein_coding	ENSG00000186132.15	chr2	-	0.605	0.885	20.4	9.94e-06	0.000133
SHE	126669	protein_coding	ENSG00000169291.10	chr1	-	-4.07	-1.19	20.4	9.94e-06	0.000133
AC116366.3	0	protein_coding	ENSG00000283782.2	chr5	+	-2.21	-4.29	20.4	9.9e-06	0.000133
PDE12	201626	protein_coding	ENSG00000174840.9	chr3	+	0.541	4.84	20.3	1.01e-05	0.000135
MLN	4295	protein_coding	ENSG00000096395.11	chr6	-	1.68	-3.89	20.3	1.02e-05	0.000136
GIMAP2	26157	protein_coding	ENSG00000106560.11	chr7	+	-1.36	4.3	20.3	1.03e-05	0.000137
CLEC4E	26253	protein_coding	ENSG00000166523.7	chr12	-	-3.88	2.59	20.3	1.03e-05	0.000137
GLS	2744	protein_coding	ENSG00000115419.12	chr2	+	-0.749	7.16	20.3	1.04e-05	0.000138
NIPSNAP2	2631	protein_coding	ENSG00000146729.10	chr7	+	0.454	4.86	20.3	1.04e-05	0.000138
SLC27A3	11000	protein_coding	ENSG00000143554.14	chr1	+	-1.4	4.7	20.3	1.04e-05	0.000138
RAB3IP	117177	protein_coding	ENSG00000127328.21	chr12	+	1.17	3.88	20.3	1.04e-05	0.000138
CDC42BPA	8476	protein_coding	ENSG00000143776.18	chr1	-	-2.91	2.64	20.3	1.04e-05	0.000138
SPIRE1	56907	protein_coding	ENSG00000134278.15	chr18	-	1.4	0.0273	20.3	1.04e-05	0.000138
TRIL	9865	protein_coding	ENSG00000255690.2	chr7	-	-4.36	-2.98	20.3	1.04e-05	0.000138
CNOT6L	246175	protein_coding	ENSG00000138767.13	chr4	-	-0.952	7.31	20.3	1.05e-05	0.000139
IRAK3	11213	protein_coding	ENSG00000090376.10	chr12	+	-1.73	6.02	20.2	1.06e-05	0.000139
NCOA7	135112	protein_coding	ENSG00000111912.20	chr6	+	-0.808	5.26	20.3	1.05e-05	0.000139
ELOA3D	162699	protein_coding	ENSG00000274744.2	chr18	-	1.6	-4.51	64.3	1.05e-05	0.000139
CLEC11A	6320	protein_coding	ENSG00000105472.13	chr19	+	1.51	4.92	20.2	1.06e-05	0.00014
VPS26B	112936	protein_coding	ENSG00000151502.11	chr11	+	-1.46	5.99	20.2	1.06e-05	0.00014
TRAT1	50852	protein_coding	ENSG00000163519.13	chr3	+	-2.26	2.38	20.2	1.06e-05	0.00014
MRPL37	51253	protein_coding	ENSG00000116221.15	chr1	+	0.526	4.46	20.2	1.07e-05	0.000141
CHAC1	79094	protein_coding	ENSG00000128965.13	chr15	+	1.44	0.992	20.2	1.08e-05	0.000142
UBA2	10054	protein_coding	ENSG00000126261.13	chr19	+	0.454	6.25	20.2	1.09e-05	0.000143
EXOG	9941	protein_coding	ENSG00000157036.13	chr3	+	0.592	3.31	20.2	1.09e-05	0.000143
GSC2	2928	protein_coding	ENSG00000063515.2	chr22	-	1.58	-4.32	20.2	1.08e-05	0.000143
PPM1G	5496	protein_coding	ENSG00000115241.11	chr2	-	0.489	6.04	20.2	1.1e-05	0.000144
MIPOL1	145282	protein_coding	ENSG00000151338.18	chr14	+	-4.26	-0.425	20.2	1.1e-05	0.000144
SUN2	25777	protein_coding	ENSG00000100242.15	chr22	-	-0.699	7.84	20.1	1.11e-05	0.000145
F13A1	2162	protein_coding	ENSG00000124491.15	chr6	-	-2.82	5.37	20.1	1.11e-05	0.000145
UBE2W	55284	protein_coding	ENSG00000104343.20	chr8	-	-0.777	5.02	20.1	1.11e-05	0.000145
FARP1	10160	protein_coding	ENSG00000152767.16	chr13	+	-2.37	4.18	20.2	1.1e-05	0.000145
CXCL5	6374	protein_coding	ENSG00000163735.7	chr4	-	-5.01	-1.57	20.2	1.1e-05	0.000145
CKLF	51192	protein_coding	ENSG00000217555.12	chr16	+	-1.33	0.571	20.1	1.12e-05	0.000147
CNBD1	168975	protein_coding	ENSG00000176571.11	chr8	+	-5.25	-1.87	20.1	1.14e-05	0.000149
ACVRL1	94	protein_coding	ENSG00000139567.12	chr12	+	-3.74	-1.83	20.1	1.14e-05	0.000149
ZNF346	23567	protein_coding	ENSG00000113761.12	chr5	+	0.484	3.69	20.1	1.16e-05	0.00015
TNFRSF13B	23495	protein_coding	ENSG00000240505.8	chr17	-	2.14	1.5	20.1	1.16e-05	0.00015
ADAMTSL4	54507	protein_coding	ENSG00000143382.14	chr1	+	-1.78	1.75	20.1	1.15e-05	0.00015
PLGLB1	5343	protein_coding	ENSG00000183281.14	chr2	-	1.04	0.126	20.1	1.16e-05	0.00015
MRPS26	64949	protein_coding	ENSG00000125901.6	chr20	+	0.85	2.9	20	1.16e-05	0.000151
AKAP1	8165	protein_coding	ENSG00000121057.13	chr17	+	0.79	4.1	20	1.16e-05	0.000151
SIAH3	283514	protein_coding	ENSG00000215475.5	chr13	-	-3.43	-0.779	20	1.16e-05	0.000151
CALM1	801	protein_coding	ENSG00000198668.12	chr14	+	-0.659	7.85	20	1.17e-05	0.000152
TNFRSF14	8764	protein_coding	ENSG00000157873.17	chr1	+	-0.78	5.82	20	1.17e-05	0.000152
SUPT3H	8464	protein_coding	ENSG00000196284.16	chr6	-	-1.24	4	20	1.17e-05	0.000152
TRMT9B	57604	protein_coding	ENSG00000250305.9	chr8	+	-6.01	0.717	20	1.17e-05	0.000152
GRM4	2914	protein_coding	ENSG00000124493.13	chr6	-	1.87	-3.06	20	1.17e-05	0.000152
MYBPC3	4607	protein_coding	ENSG00000134571.11	chr11	-	-1.06	0.544	20	1.19e-05	0.000153
LITAF	9516	protein_coding	ENSG00000189067.12	chr16	-	-1.49	5.13	20	1.19e-05	0.000154
PARP12	64761	protein_coding	ENSG00000059378.12	chr7	-	-0.834	5.31	20	1.19e-05	0.000154
KRTAP4-11	653240	protein_coding	ENSG00000212721.3	chr17	-	-2.53	-4.21	20.1	1.2e-05	0.000155
LYL1	4066	protein_coding	ENSG00000104903.4	chr19	-	-1.29	4.31	20	1.21e-05	0.000156
ALS2CL	259173	protein_coding	ENSG00000178038.17	chr3	-	-1.72	3.07	20	1.21e-05	0.000156
ADGRB3	577	protein_coding	ENSG00000135298.14	chr6	+	-4.5	-1.53	20	1.21e-05	0.000156
GMDS	2762	protein_coding	ENSG00000112699.11	chr6	-	0.674	2.76	19.9	1.23e-05	0.000158
ADM	133	protein_coding	ENSG00000148926.10	chr11	+	-2.78	3.6	19.9	1.24e-05	0.000159
MAD2L1	4085	protein_coding	ENSG00000164109.14	chr4	-	0.907	3.57	19.9	1.24e-05	0.000159
PI16	221476	protein_coding	ENSG00000164530.15	chr6	+	-3.08	1.45	19.9	1.24e-05	0.000159
CEACAM1	634	protein_coding	ENSG00000079385.22	chr19	-	-2.37	2.18	19.9	1.23e-05	0.000159
HERC6	55008	protein_coding	ENSG00000138642.14	chr4	+	-1.06	3.39	19.9	1.24e-05	0.00016
PABPC4L	132430	protein_coding	ENSG00000254535.4	chr4	-	-6.61	-0.86	19.9	1.25e-05	0.00016
LINGO4	339398	protein_coding	ENSG00000213171.2	chr1	-	-3.22	-3.34	19.9	1.25e-05	0.00016
SLC9A9	285195	protein_coding	ENSG00000181804.15	chr3	-	-1.55	3.01	19.9	1.25e-05	0.000161
ZNF680	340252	protein_coding	ENSG00000173041.12	chr7	-	0.703	3.61	19.9	1.26e-05	0.000162
GLRX3	10539	protein_coding	ENSG00000108010.12	chr10	+	0.428	4.79	19.8	1.28e-05	0.000164
C6orf89	221477	protein_coding	ENSG00000198663.16	chr6	+	-0.657	5.04	19.8	1.28e-05	0.000164
ZNF311	282890	protein_coding	ENSG00000197935.6	chr6	-	-2.82	-0.377	19.8	1.28e-05	0.000164
SEMA6A	57556	protein_coding	ENSG00000092421.16	chr5	-	-3.21	6.53	19.8	1.31e-05	0.000167
SH3RF1	57630	protein_coding	ENSG00000154447.15	chr4	-	-1.18	4.76	19.8	1.31e-05	0.000167
IGF2BP1	10642	protein_coding	ENSG00000159217.10	chr17	+	-8.42	3.97	19.8	1.31e-05	0.000167
ITSN2	50618	protein_coding	ENSG00000198399.14	chr2	-	-0.782	7.15	19.8	1.32e-05	0.000168
NPTX2	4885	protein_coding	ENSG00000106236.4	chr7	+	-6.26	0.984	19.8	1.32e-05	0.000168
C1R	715	protein_coding	ENSG00000159403.18	chr12	-	-1.12	1.24	19.8	1.32e-05	0.000168
GOLGA6L10	647042	protein_coding	ENSG00000278662.4	chr15	-	1.05	-0.333	19.8	1.32e-05	0.000168
SPI1	6688	protein_coding	ENSG00000066336.11	chr11	-	-0.926	5.27	19.8	1.33e-05	0.000169
CNR1	1268	protein_coding	ENSG00000118432.12	chr6	-	2.4	1.35	19.8	1.33e-05	0.00017
SOD2	6648	protein_coding	ENSG00000112096.18	chr6	-	-1.07	7.16	19.7	1.34e-05	0.000171
CD1B	910	protein_coding	ENSG00000158485.10	chr1	-	-3.24	-3.43	19.7	1.35e-05	0.000171
TG	7038	protein_coding	ENSG00000042832.12	chr8	+	-1.76	0.776	19.7	1.35e-05	0.000172
NECAB3	63941	protein_coding	ENSG00000125967.16	chr20	-	0.831	2.48	19.7	1.37e-05	0.000173
ATP8B3	148229	protein_coding	ENSG00000130270.16	chr19	-	1.05	1.69	19.7	1.36e-05	0.000173
SLC1A3	6507	protein_coding	ENSG00000079215.14	chr5	+	-2.79	0.277	19.7	1.36e-05	0.000173
CSF2	1437	protein_coding	ENSG00000164400.6	chr5	+	-2.53	-4.21	19.8	1.36e-05	0.000173
RNF208	727800	protein_coding	ENSG00000212864.3	chr9	-	1.39	-0.86	19.7	1.38e-05	0.000174
NEDD9	4739	protein_coding	ENSG00000111859.17	chr6	-	-1.64	5.14	19.7	1.38e-05	0.000175
FZD2	2535	protein_coding	ENSG00000180340.6	chr17	+	1.45	0.287	19.7	1.38e-05	0.000175
TNS1	7145	protein_coding	ENSG00000079308.19	chr2	-	-2.16	6.23	19.7	1.39e-05	0.000176
TPRN	286262	protein_coding	ENSG00000176058.13	chr9	-	0.821	2.3	19.7	1.39e-05	0.000176
MAP7	9053	protein_coding	ENSG00000135525.18	chr6	-	-3.28	1.28	19.7	1.4e-05	0.000176
AGPAT3	56894	protein_coding	ENSG00000160216.19	chr21	+	-1.05	4.67	19.6	1.42e-05	0.000179
SPIB	6689	protein_coding	ENSG00000269404.7	chr19	+	1.74	3.19	19.6	1.42e-05	0.000179
PRKAA1	5562	protein_coding	ENSG00000132356.11	chr5	-	-0.581	6.05	19.6	1.43e-05	0.00018
CDK2	1017	protein_coding	ENSG00000123374.11	chr12	+	0.635	4.68	19.6	1.43e-05	0.00018
TTC19	54902	protein_coding	ENSG00000011295.16	chr17	+	0.395	4.7	19.6	1.43e-05	0.00018
GM2A	2760	protein_coding	ENSG00000196743.8	chr5	+	1.03	4.36	19.6	1.45e-05	0.000182
LMO4	8543	protein_coding	ENSG00000143013.13	chr1	+	0.989	4.29	19.6	1.47e-05	0.000185
TPO	7173	protein_coding	ENSG00000115705.21	chr2	+	-3.22	-0.621	19.5	1.49e-05	0.000186
POGK	57645	protein_coding	ENSG00000143157.11	chr1	+	0.65	4.64	19.5	1.5e-05	0.000188
PCDH10	57575	protein_coding	ENSG00000138650.9	chr4	+	-7.99	2.49	19.5	1.5e-05	0.000188
C4orf45	152940	protein_coding	ENSG00000164123.6	chr4	-	1.66	-2.29	19.5	1.51e-05	0.000189
SSRP1	6749	protein_coding	ENSG00000149136.9	chr11	-	0.633	6.19	19.5	1.53e-05	0.00019
CASP10	843	protein_coding	ENSG00000003400.14	chr2	+	-1.2	5.66	19.5	1.52e-05	0.00019
PALM	5064	protein_coding	ENSG00000099864.18	chr19	+	-2.25	4.09	19.5	1.52e-05	0.00019
DPH2	1802	protein_coding	ENSG00000132768.14	chr1	+	0.779	3.2	19.5	1.52e-05	0.00019
COL8A2	1296	protein_coding	ENSG00000171812.13	chr1	-	1.6	0.141	19.5	1.52e-05	0.00019
CASKIN1	57524	protein_coding	ENSG00000167971.15	chr16	-	1.74	-1.9	19.5	1.52e-05	0.00019
C15orf61	145853	protein_coding	ENSG00000189227.6	chr15	+	0.65	1.89	19.5	1.53e-05	0.000191
TUT7	79670	protein_coding	ENSG00000083223.18	chr9	-	-0.807	5.67	19.5	1.55e-05	0.000192
OPN3	23596	protein_coding	ENSG00000054277.14	chr1	-	1.18	2.67	19.5	1.54e-05	0.000192
A2M	2	protein_coding	ENSG00000175899.14	chr12	-	-2.71	2.12	19.4	1.55e-05	0.000193
HDAC11	79885	protein_coding	ENSG00000163517.15	chr3	+	-1.2	0.906	19.4	1.56e-05	0.000193
STOX2	56977	protein_coding	ENSG00000173320.12	chr4	+	-4.76	-0.0947	19.4	1.56e-05	0.000193
CHRNA5	1138	protein_coding	ENSG00000169684.13	chr15	+	1.25	-0.943	19.4	1.55e-05	0.000193
VIP	7432	protein_coding	ENSG00000146469.13	chr6	+	-2.55	-4.21	19.5	1.56e-05	0.000193
HMGCS2	3158	protein_coding	ENSG00000134240.11	chr1	-	1.84	-4.21	19.4	1.57e-05	0.000194
TRMT12	55039	protein_coding	ENSG00000183665.5	chr8	+	-0.986	3.52	19.4	1.57e-05	0.000195
GRB7	2886	protein_coding	ENSG00000141738.14	chr17	+	-3.24	1.05	19.4	1.58e-05	0.000195
EPN2	22905	protein_coding	ENSG00000072134.15	chr17	+	-2.74	1.54	19.4	1.57e-05	0.000195
MFAP2	4237	protein_coding	ENSG00000117122.13	chr1	-	-2.63	-1.21	19.4	1.57e-05	0.000195
DALRD3	55152	protein_coding	ENSG00000178149.17	chr3	-	0.67	3.51	19.4	1.59e-05	0.000197
RXYLT1	10329	protein_coding	ENSG00000118600.11	chr12	+	0.734	1.7	19.4	1.61e-05	0.000199
GDI1	2664	protein_coding	ENSG00000203879.12	chrX	+	-0.539	6	19.3	1.64e-05	0.000202
TOP2A	7153	protein_coding	ENSG00000131747.15	chr17	-	1.14	5.58	19.3	1.64e-05	0.000202
PEX1	5189	protein_coding	ENSG00000127980.16	chr7	-	0.478	4.66	19.3	1.63e-05	0.000202
VWA2	340706	protein_coding	ENSG00000165816.13	chr10	+	-3.19	4.49	19.3	1.64e-05	0.000202
MCTP1	79772	protein_coding	ENSG00000175471.19	chr5	-	-1.81	3.46	19.3	1.64e-05	0.000202
NBEA	26960	protein_coding	ENSG00000172915.18	chr13	+	1.52	2.63	19.3	1.64e-05	0.000202
RUBCN	9711	protein_coding	ENSG00000145016.16	chr3	-	-0.829	5.2	19.3	1.65e-05	0.000203
ARHGAP28	79822	protein_coding	ENSG00000088756.12	chr18	+	2.09	-3.6	19.3	1.65e-05	0.000203
MS4A7	58475	protein_coding	ENSG00000166927.13	chr11	+	-1.81	2.2	19.3	1.66e-05	0.000204
PRMT2	3275	protein_coding	ENSG00000160310.18	chr21	+	-0.845	5.48	19.3	1.67e-05	0.000205
CRIP3	401262	protein_coding	ENSG00000146215.13	chr6	-	-2.08	-1.39	19.3	1.67e-05	0.000205
TJP1	7082	protein_coding	ENSG00000104067.16	chr15	-	-4.63	-1.85	19.3	1.67e-05	0.000205
EGFL7	51162	protein_coding	ENSG00000172889.16	chr9	+	-2.38	4.94	19.3	1.68e-05	0.000206
TUBGCP5	114791	protein_coding	ENSG00000275835.5	chr15	-	0.59	4.17	19.3	1.68e-05	0.000206
TNFSF13B	10673	protein_coding	ENSG00000102524.11	chr13	+	-1.83	1.98	19.3	1.68e-05	0.000206
ELOA3	100506888	protein_coding	ENSG00000183791.5	chr18	-	1.6	-4.52	67.8	1.69e-05	0.000207
PPIH	10465	protein_coding	ENSG00000171960.11	chr1	+	0.478	3.17	19.2	1.73e-05	0.000211
PDGFC	56034	protein_coding	ENSG00000145431.11	chr4	-	-4.6	1.54	19.2	1.73e-05	0.000211
TRPM2	7226	protein_coding	ENSG00000142185.16	chr21	+	-1.57	5.59	19.2	1.74e-05	0.000212
B4GALT7	11285	protein_coding	ENSG00000027847.14	chr5	+	0.473	3.35	19.2	1.74e-05	0.000213
MS4A1	931	protein_coding	ENSG00000156738.17	chr11	+	-2.45	6.94	19.2	1.76e-05	0.000214
TIAM2	26230	protein_coding	ENSG00000146426.18	chr6	+	-1.77	4.95	19.2	1.76e-05	0.000214
LAIR2	3904	protein_coding	ENSG00000167618.10	chr19	+	-1.52	0.448	19.2	1.76e-05	0.000214
SDHAF3	57001	protein_coding	ENSG00000196636.7	chr7	+	1.1	1.25	19.2	1.76e-05	0.000214
SPATA25	128497	protein_coding	ENSG00000149634.4	chr20	-	0.888	-1.7	19.2	1.75e-05	0.000214
ARHGAP39	80728	protein_coding	ENSG00000147799.11	chr8	-	-3.35	-0.554	19.2	1.76e-05	0.000214
SLC17A7	57030	protein_coding	ENSG00000104888.10	chr19	-	-3.74	0.0379	19.2	1.77e-05	0.000214
PDGFRA	5156	protein_coding	ENSG00000134853.12	chr4	+	-6.61	-0.299	19.2	1.76e-05	0.000214
PRDM6	93166	protein_coding	ENSG00000061455.11	chr5	+	1.91	-3.15	19.2	1.75e-05	0.000214
NPY	4852	protein_coding	ENSG00000122585.8	chr7	+	-3.72	4.15	19.2	1.77e-05	0.000215
TC2N	123036	protein_coding	ENSG00000165929.13	chr14	-	-1.97	4.03	19.2	1.78e-05	0.000216
JCAD	57608	protein_coding	ENSG00000165757.9	chr10	-	-2.94	2.78	19.1	1.79e-05	0.000217
CNNM2	54805	protein_coding	ENSG00000148842.18	chr10	+	0.565	3.4	19.2	1.79e-05	0.000217
LYVE1	10894	protein_coding	ENSG00000133800.8	chr11	-	-5.53	1.54	19.1	1.8e-05	0.000218
DIPK1C	125704	protein_coding	ENSG00000187773.8	chr18	-	-3.59	3.25	19.1	1.81e-05	0.000219
FZD7	8324	protein_coding	ENSG00000155760.2	chr2	+	-2.27	-0.457	19.1	1.81e-05	0.000219
SLC16A13	201232	protein_coding	ENSG00000174327.6	chr17	+	-1.25	0.472	19.1	1.82e-05	0.00022
FAM83B	222584	protein_coding	ENSG00000168143.9	chr6	+	-4.2	-3.56	19.2	1.82e-05	0.00022
DNMT3B	1789	protein_coding	ENSG00000088305.18	chr20	+	0.995	3.35	19.1	1.83e-05	0.000221
UGT2B11	10720	protein_coding	ENSG00000213759.9	chr4	-	-6.68	-1.36	19.1	1.83e-05	0.000221
NAT16	375607	protein_coding	ENSG00000167011.9	chr7	-	2.23	-2.76	19.1	1.83e-05	0.000221
IFI44L	10964	protein_coding	ENSG00000137959.16	chr1	+	-3.37	5.26	19.1	1.84e-05	0.000222
BST2	684	protein_coding	ENSG00000130303.13	chr19	-	-1.04	4.26	19.1	1.87e-05	0.000224
BMP3	651	protein_coding	ENSG00000152785.7	chr4	+	-4.32	3	19.1	1.87e-05	0.000224
LRRC4B	94030	protein_coding	ENSG00000131409.13	chr19	-	-5.47	-0.0936	19.1	1.86e-05	0.000224
SEPT4	5414	protein_coding	ENSG00000108387.14	chr17	-	1.55	-0.978	19.1	1.86e-05	0.000224
MRPL42	28977	protein_coding	ENSG00000198015.13	chr12	+	0.409	5.3	19.1	1.88e-05	0.000226
DIRAS3	9077	protein_coding	ENSG00000162595.6	chr1	-	-4.92	-3.13	19.1	1.89e-05	0.000226
SSB	6741	protein_coding	ENSG00000138385.16	chr2	+	0.543	5.55	19	1.89e-05	0.000227
FAM216A	29902	protein_coding	ENSG00000204856.12	chr12	+	0.81	2.69	19	1.89e-05	0.000227
NCOA3	8202	protein_coding	ENSG00000124151.19	chr20	+	-0.691	6.65	19	1.91e-05	0.000228
DEPDC1B	55789	protein_coding	ENSG00000035499.13	chr5	-	1.07	2.36	19	1.9e-05	0.000228
ACAA2	10449	protein_coding	ENSG00000167315.18	chr18	-	0.841	3.88	19	1.93e-05	0.00023
OCIAD2	132299	protein_coding	ENSG00000145247.11	chr4	-	0.91	2.9	19	1.94e-05	0.00023
SLC26A11	284129	protein_coding	ENSG00000181045.15	chr17	+	-1.78	1.93	19	1.92e-05	0.00023
TSPAN5	10098	protein_coding	ENSG00000168785.8	chr4	-	-2.43	3.2	19	1.92e-05	0.00023
SLC25A10	1468	protein_coding	ENSG00000183048.12	chr17	+	0.983	0.29	19	1.93e-05	0.00023
THSD7B	80731	protein_coding	ENSG00000144229.12	chr2	+	-3.86	-0.436	19	1.93e-05	0.00023
FLRT1	23769	protein_coding	ENSG00000126500.3	chr11	+	2.07	-1.66	19	1.92e-05	0.00023
CCL8	6355	protein_coding	ENSG00000108700.5	chr17	+	-3.71	-3.81	19.1	1.93e-05	0.00023
GRIK3	2899	protein_coding	ENSG00000163873.10	chr1	-	2.65	-0.735	19	1.94e-05	0.000231
CYP4F11	57834	protein_coding	ENSG00000171903.16	chr19	-	2.08	-3.66	19	1.94e-05	0.000231
ME1	4199	protein_coding	ENSG00000065833.9	chr6	-	-2.77	-1.65	19	1.95e-05	0.000232
PFKFB2	5208	protein_coding	ENSG00000123836.15	chr1	+	-2.79	5.73	19	1.97e-05	0.000233
TPTE2	93492	protein_coding	ENSG00000132958.17	chr13	-	1.48	-2.12	19	1.96e-05	0.000233
BTN3A1	11119	protein_coding	ENSG00000026950.17	chr6	+	-0.812	5.81	19	1.97e-05	0.000234
SLCO2B1	11309	protein_coding	ENSG00000137491.14	chr11	+	-4.29	0.536	19	1.97e-05	0.000234
VAV1	7409	protein_coding	ENSG00000141968.8	chr19	+	-0.77	6.26	18.9	1.98e-05	0.000235
RNF103-CHMP3	100526767	protein_coding	ENSG00000249884.8	chr2	-	0.961	-0.787	18.9	1.98e-05	0.000235
DENND5B	160518	protein_coding	ENSG00000170456.16	chr12	-	1.41	3.2	18.9	2e-05	0.000236
AC092835.1	0	protein_coding	ENSG00000233757.6	chr2	+	1.09	-0.114	18.9	2.01e-05	0.000237
CPA6	57094	protein_coding	ENSG00000165078.12	chr8	-	-7	-0.269	18.9	2.01e-05	0.000237
FAM171B	165215	protein_coding	ENSG00000144369.13	chr2	+	-2.62	-1.42	18.9	2.01e-05	0.000237
LTB	4050	protein_coding	ENSG00000227507.2	chr6	-	-1.95	5.54	18.9	2.02e-05	0.000238
ADAM10	102	protein_coding	ENSG00000137845.15	chr15	-	0.68	7.05	18.9	2.01e-05	0.000238
AC005261.1	57343	protein_coding	ENSG00000131845.14	chr19	+	0.677	3.58	18.9	2.02e-05	0.000238
DUSP26	78986	protein_coding	ENSG00000133878.9	chr8	-	-2.96	1.99	18.9	2.02e-05	0.000238
GAS6	2621	protein_coding	ENSG00000183087.15	chr13	-	-2.55	2.9	18.9	2.01e-05	0.000238
CYP4Z1	199974	protein_coding	ENSG00000186160.5	chr1	+	1.7	-4.28	18.9	2.03e-05	0.000238
ARRDC2	27106	protein_coding	ENSG00000105643.10	chr19	+	-0.909	6.88	18.9	2.04e-05	0.00024
KHDC3L	154288	protein_coding	ENSG00000203908.4	chr6	+	1.78	-4.21	18.9	2.04e-05	0.00024
LINGO1	84894	protein_coding	ENSG00000169783.12	chr15	-	-4.87	-2.07	18.9	2.05e-05	0.000241
JARID2	3720	protein_coding	ENSG00000008083.14	chr6	+	0.847	6.62	18.9	2.07e-05	0.000242
CARD17	440068	protein_coding	ENSG00000255221.3	chr11	-	-3.19	-1.45	18.9	2.06e-05	0.000242
ZBTB8B	728116	protein_coding	ENSG00000273274.2	chr1	+	2.18	-2.26	18.9	2.06e-05	0.000242
OR4M1	441670	protein_coding	ENSG00000176299.5	chr14	+	-3.73	-3.8	18.9	2.09e-05	0.000245
NOP14	8602	protein_coding	ENSG00000087269.16	chr4	-	0.465	4.72	18.8	2.11e-05	0.000246
HCRTR1	3061	protein_coding	ENSG00000121764.11	chr1	+	-2.57	-0.766	18.8	2.1e-05	0.000246
KRT8	3856	protein_coding	ENSG00000170421.12	chr12	-	-2.83	-0.822	18.8	2.1e-05	0.000246
PITPNM3	83394	protein_coding	ENSG00000091622.16	chr17	-	0.953	-0.378	18.8	2.11e-05	0.000246
SPATA46	284680	protein_coding	ENSG00000171722.12	chr1	-	-3.45	-3.4	18.8	2.1e-05	0.000246
KDELR2	11014	protein_coding	ENSG00000136240.10	chr7	-	0.535	4.39	18.8	2.12e-05	0.000248
OR2M4	26245	protein_coding	ENSG00000171180.2	chr1	+	-3.21	-2.61	18.8	2.12e-05	0.000248
ARHGEF17	9828	protein_coding	ENSG00000110237.4	chr11	+	-2.22	5.23	18.8	2.14e-05	0.000249
ARMH1	339541	protein_coding	ENSG00000198520.12	chr1	+	-1.28	6.38	18.8	2.15e-05	0.00025
PLXNB2	23654	protein_coding	ENSG00000196576.15	chr22	-	-1.12	7.52	18.8	2.15e-05	0.00025
SDC1	6382	protein_coding	ENSG00000115884.11	chr2	-	1.6	1.44	18.8	2.15e-05	0.00025
ADAMTS16	170690	protein_coding	ENSG00000145536.15	chr5	+	-7.44	1.19	18.8	2.14e-05	0.00025
DOK5	55816	protein_coding	ENSG00000101134.11	chr20	+	-4.4	-2.68	18.8	2.15e-05	0.00025
CBX6	23466	protein_coding	ENSG00000183741.11	chr22	-	0.778	4.97	18.8	2.16e-05	0.000251
TTLL1	25809	protein_coding	ENSG00000100271.17	chr22	-	0.791	1.24	18.8	2.15e-05	0.000251
SLC31A2	1318	protein_coding	ENSG00000136867.11	chr9	+	-1.53	0.854	18.8	2.16e-05	0.000251
RUNX1	861	protein_coding	ENSG00000159216.18	chr21	-	0.691	7.34	18.8	2.17e-05	0.000252
TDRD1	56165	protein_coding	ENSG00000095627.9	chr10	+	-4.1	-0.841	18.8	2.17e-05	0.000252
OR2M3	127062	protein_coding	ENSG00000228198.3	chr1	+	-3.18	-2.44	18.8	2.17e-05	0.000252
ERH	2079	protein_coding	ENSG00000100632.11	chr14	-	0.707	4.62	18.7	2.18e-05	0.000253
FGF13	2258	protein_coding	ENSG00000129682.16	chrX	-	-4.47	-0.82	18.7	2.18e-05	0.000253
ANO8	57719	protein_coding	ENSG00000074855.11	chr19	-	0.797	3.4	18.7	2.19e-05	0.000254
FSCN1	6624	protein_coding	ENSG00000075618.18	chr7	+	-1.98	4.28	18.7	2.2e-05	0.000255
GRAPL	400581	protein_coding	ENSG00000189152.10	chr17	+	-1.39	-1.22	18.7	2.21e-05	0.000255
ZNF804A	91752	protein_coding	ENSG00000170396.8	chr2	+	-4.01	-0.767	18.7	2.2e-05	0.000255
H2AFV	94239	protein_coding	ENSG00000105968.18	chr7	-	0.528	6.83	18.7	2.22e-05	0.000256
ACVR2A	92	protein_coding	ENSG00000121989.15	chr2	+	-2.61	2.61	18.7	2.22e-05	0.000256
CHRDL1	91851	protein_coding	ENSG00000101938.14	chrX	-	-5.79	1.3	18.7	2.23e-05	0.000257
TAFA1	407738	protein_coding	ENSG00000183662.11	chr3	+	-4.86	0.882	18.7	2.23e-05	0.000257
ZNF652	22834	protein_coding	ENSG00000198740.8	chr17	-	-0.658	5.19	18.7	2.24e-05	0.000258
TREML1	340205	protein_coding	ENSG00000161911.11	chr6	-	-3.06	-0.583	18.7	2.24e-05	0.000258
SMIM3	85027	protein_coding	ENSG00000256235.2	chr5	+	-1.53	7.11	18.7	2.26e-05	0.00026
RPL39L	116832	protein_coding	ENSG00000163923.10	chr3	-	1.39	1.01	18.7	2.28e-05	0.000262
CA6	765	protein_coding	ENSG00000131686.15	chr1	+	-3.55	1.37	18.7	2.28e-05	0.000262
PON2	5445	protein_coding	ENSG00000105854.13	chr7	-	-2.62	3.72	18.6	2.29e-05	0.000263
BCL9L	283149	protein_coding	ENSG00000186174.12	chr11	-	-1.27	4.68	18.6	2.3e-05	0.000263
MYF6	4618	protein_coding	ENSG00000111046.4	chr12	+	-8.25	0.104	18.6	2.3e-05	0.000263
DRICH1	51233	protein_coding	ENSG00000189269.12	chr22	-	0.945	0.13	18.6	2.29e-05	0.000263
CHTOP	26097	protein_coding	ENSG00000160679.13	chr1	+	-0.461	5.98	18.6	2.31e-05	0.000265
KLF11	8462	protein_coding	ENSG00000172059.11	chr2	+	-2.03	4.93	18.6	2.32e-05	0.000265
CCR7	1236	protein_coding	ENSG00000126353.3	chr17	-	-1.69	3.86	18.6	2.31e-05	0.000265
MAP4K4	9448	protein_coding	ENSG00000071054.16	chr2	+	-0.628	7.6	18.6	2.32e-05	0.000266
ESYT1	23344	protein_coding	ENSG00000139641.12	chr12	+	0.62	6.13	18.6	2.33e-05	0.000266
ZNF37A	7587	protein_coding	ENSG00000075407.18	chr10	+	0.647	4.97	18.6	2.32e-05	0.000266
IFT22	64792	protein_coding	ENSG00000128581.16	chr7	-	0.859	2.01	18.6	2.34e-05	0.000267
CNST	163882	protein_coding	ENSG00000162852.14	chr1	+	-0.611	5.59	18.6	2.36e-05	0.000269
PDIA5	10954	protein_coding	ENSG00000065485.20	chr3	+	-1.28	1.62	18.6	2.38e-05	0.000271
RILPL1	353116	protein_coding	ENSG00000188026.13	chr12	-	-1.55	1.57	18.6	2.37e-05	0.000271
HFE	3077	protein_coding	ENSG00000010704.18	chr6	+	-1.34	-0.0772	18.6	2.38e-05	0.000271
SYNC	81493	protein_coding	ENSG00000162520.14	chr1	-	1.74	-2.21	18.6	2.38e-05	0.000271
FGD3	89846	protein_coding	ENSG00000127084.19	chr9	+	-0.594	5.98	18.6	2.39e-05	0.000272
AAGAB	79719	protein_coding	ENSG00000103591.12	chr15	-	0.479	4.35	18.6	2.39e-05	0.000272
PPHLN1	51535	protein_coding	ENSG00000134283.17	chr12	+	0.419	5.42	18.6	2.4e-05	0.000272
COL6A3	1293	protein_coding	ENSG00000163359.15	chr2	-	-3.82	2.43	18.6	2.39e-05	0.000272
AK4	205	protein_coding	ENSG00000162433.15	chr1	+	1.74	0.611	18.5	2.41e-05	0.000273
RGL3	57139	protein_coding	ENSG00000205517.12	chr19	-	-4.64	-1.06	18.5	2.41e-05	0.000273
PGM2	55276	protein_coding	ENSG00000169299.14	chr4	+	0.633	4.21	18.5	2.42e-05	0.000274
RASA3	22821	protein_coding	ENSG00000185989.11	chr13	-	-1.19	5.12	18.5	2.44e-05	0.000276
GPAT4	137964	protein_coding	ENSG00000158669.11	chr8	+	-0.586	5.78	18.5	2.44e-05	0.000276
AP3M2	10947	protein_coding	ENSG00000070718.12	chr8	+	-0.751	4.21	18.5	2.44e-05	0.000276
FCHO2	115548	protein_coding	ENSG00000157107.14	chr5	+	-2.1	3.89	18.5	2.44e-05	0.000276
MS4A6A	64231	protein_coding	ENSG00000110077.14	chr11	-	-2.6	2.83	18.5	2.43e-05	0.000276
CMTM1	113540	protein_coding	ENSG00000089505.17	chr16	+	-1.52	0.322	18.5	2.44e-05	0.000276
TLR2	7097	protein_coding	ENSG00000137462.8	chr4	+	-1.63	4.03	18.5	2.45e-05	0.000277
BEST1	7439	protein_coding	ENSG00000167995.16	chr11	+	-1.62	1.55	18.5	2.46e-05	0.000277
NDUFS1	4719	protein_coding	ENSG00000023228.14	chr2	-	0.418	5.34	18.5	2.47e-05	0.000278
CCN3	4856	protein_coding	ENSG00000136999.5	chr8	+	-4.48	1.06	18.5	2.46e-05	0.000278
CASC1	55259	protein_coding	ENSG00000118307.19	chr12	-	1.21	-0.718	18.5	2.47e-05	0.000278
PNPT1	87178	protein_coding	ENSG00000138035.15	chr2	-	0.562	4.14	18.5	2.51e-05	0.000283
SYDE1	85360	protein_coding	ENSG00000105137.13	chr19	+	-3.69	-0.617	18.5	2.51e-05	0.000283
IGFBP5	3488	protein_coding	ENSG00000115461.5	chr2	-	-4.85	-1	18.5	2.52e-05	0.000283
LSM11	134353	protein_coding	ENSG00000155858.6	chr5	+	0.881	1.49	18.4	2.53e-05	0.000284
AHNAK	79026	protein_coding	ENSG00000124942.14	chr11	-	-1.64	8.56	18.4	2.54e-05	0.000285
ZNF333	84449	protein_coding	ENSG00000160961.12	chr19	+	-0.554	4.26	18.4	2.54e-05	0.000285
GPR153	387509	protein_coding	ENSG00000158292.7	chr1	-	1.58	1.17	18.4	2.54e-05	0.000285
GPD1	2819	protein_coding	ENSG00000167588.13	chr12	+	0.95	-0.791	18.4	2.55e-05	0.000286
PF4V1	5197	protein_coding	ENSG00000109272.4	chr4	+	-5.58	-1.55	18.4	2.56e-05	0.000287
CWC27	10283	protein_coding	ENSG00000153015.16	chr5	+	0.462	3.86	18.4	2.57e-05	0.000288
AREG	374	protein_coding	ENSG00000109321.11	chr4	+	-3.51	2.46	18.4	2.57e-05	0.000288
OAS3	4940	protein_coding	ENSG00000111331.13	chr12	+	-1.48	4.95	18.4	2.59e-05	0.00029
TERF2	7014	protein_coding	ENSG00000132604.11	chr16	-	-1.19	6.32	18.4	2.6e-05	0.000291
TIMM50	92609	protein_coding	ENSG00000105197.11	chr19	+	0.482	4.17	18.4	2.6e-05	0.000291
SAT1	6303	protein_coding	ENSG00000130066.16	chrX	+	-1.18	7.4	18.4	2.62e-05	0.000292
BICD2	23299	protein_coding	ENSG00000185963.14	chr9	-	-0.784	6.35	18.4	2.62e-05	0.000292
MYBBP1A	10514	protein_coding	ENSG00000132382.14	chr17	-	0.581	4.98	18.4	2.62e-05	0.000292
TCIM	56892	protein_coding	ENSG00000176907.4	chr8	+	-6.04	-1.7	18.4	2.62e-05	0.000292
XKR8	55113	protein_coding	ENSG00000158156.7	chr1	+	-0.976	2.19	18.4	2.63e-05	0.000293
ZNF318	24149	protein_coding	ENSG00000171467.16	chr6	-	-1.18	5.49	18.3	2.65e-05	0.000295
NEK3	4752	protein_coding	ENSG00000136098.17	chr13	-	-1.69	2.04	18.3	2.65e-05	0.000295
PON1	5444	protein_coding	ENSG00000005421.8	chr7	-	-3.2	-3.82	18.3	2.65e-05	0.000295
HSPB8	26353	protein_coding	ENSG00000152137.6	chr12	+	-2.8	-4.14	18.4	2.65e-05	0.000295
SEPT3	55964	protein_coding	ENSG00000100167.20	chr22	+	1.51	-1.6	18.3	2.66e-05	0.000296
ARHGAP23	57636	protein_coding	ENSG00000275832.5	chr17	+	0.816	4.27	18.3	2.68e-05	0.000298
BEND4	389206	protein_coding	ENSG00000188848.16	chr4	-	1.88	2.48	18.3	2.68e-05	0.000298
ADAMTS9	56999	protein_coding	ENSG00000163638.13	chr3	-	2.5	-1.63	18.3	2.69e-05	0.000298
PLEKHH2	130271	protein_coding	ENSG00000152527.14	chr2	+	-2.92	-0.577	18.3	2.7e-05	0.000299
TENT5A	55603	protein_coding	ENSG00000112773.16	chr6	-	-2.28	3.21	18.3	2.7e-05	0.0003
ATP2B4	493	protein_coding	ENSG00000058668.14	chr1	+	-0.846	6.95	18.3	2.72e-05	0.000301
CELSR1	9620	protein_coding	ENSG00000075275.16	chr22	-	-2.18	3.51	18.3	2.71e-05	0.000301
IGSF10	285313	protein_coding	ENSG00000152580.8	chr3	-	-5.52	2.43	18.3	2.72e-05	0.000301
ZNF462	58499	protein_coding	ENSG00000148143.13	chr9	+	-3.49	1.19	18.3	2.73e-05	0.000302
HLX	3142	protein_coding	ENSG00000136630.13	chr1	+	-1.66	3.97	18.3	2.75e-05	0.000304
ROBO4	54538	protein_coding	ENSG00000154133.14	chr11	-	-2.89	0.551	18.3	2.76e-05	0.000305
EPS8	2059	protein_coding	ENSG00000151491.14	chr12	-	-2.11	1.15	18.3	2.76e-05	0.000305
IL33	90865	protein_coding	ENSG00000137033.11	chr9	+	-3.36	-3.8	18.3	2.77e-05	0.000305
FZD6	8323	protein_coding	ENSG00000164930.12	chr8	+	-2.48	3.85	18.3	2.77e-05	0.000306
CRIM1	51232	protein_coding	ENSG00000150938.10	chr2	+	-1.43	6.71	18.2	2.78e-05	0.000307
SSX7	280658	protein_coding	ENSG00000187754.8	chrX	-	-5.46	-2.34	18.2	2.79e-05	0.000307
ITGA1	3672	protein_coding	ENSG00000213949.9	chr5	+	-2.34	-0.0669	18.2	2.8e-05	0.000308
ARAP3	64411	protein_coding	ENSG00000120318.16	chr5	-	-2.5	1.57	18.2	2.82e-05	0.00031
RCVRN	5957	protein_coding	ENSG00000109047.7	chr17	-	1.5	0.272	18.2	2.82e-05	0.000311
XRCC5	7520	protein_coding	ENSG00000079246.16	chr2	+	0.411	7.47	18.2	2.84e-05	0.000312
PDE7B	27115	protein_coding	ENSG00000171408.14	chr6	+	-3.09	0.058	18.2	2.83e-05	0.000312
CNTNAP5	129684	protein_coding	ENSG00000155052.14	chr2	+	-3.72	-3.81	18.3	2.84e-05	0.000312
RNF157	114804	protein_coding	ENSG00000141576.16	chr17	-	-2.46	3.07	18.2	2.87e-05	0.000315
MTRNR2L7	100288485	protein_coding	ENSG00000256892.2	chr10	-	1.62	-4.48	33.3	2.9e-05	0.000318
SRPRB	58477	protein_coding	ENSG00000144867.11	chr3	+	0.58	3.49	18.1	2.92e-05	0.00032
SNX8	29886	protein_coding	ENSG00000106266.11	chr7	-	-0.935	3.47	18.1	2.92e-05	0.00032
WDR86	349136	protein_coding	ENSG00000187260.15	chr7	-	1.68	2.69	18.2	2.92e-05	0.00032
IL1R1	3554	protein_coding	ENSG00000115594.12	chr2	+	-2.82	2.13	18.2	2.92e-05	0.00032
DCHS2	54798	protein_coding	ENSG00000197410.13	chr4	-	2.64	2.85	18.1	2.93e-05	0.00032
EXTL1	2134	protein_coding	ENSG00000158008.9	chr1	+	1.83	-3.35	18.1	2.92e-05	0.00032
CDH5	1003	protein_coding	ENSG00000179776.19	chr16	+	-4.26	-2.48	18.1	2.94e-05	0.000322
CCDC78	124093	protein_coding	ENSG00000162004.17	chr16	-	1.1	1.94	18.1	2.96e-05	0.000323
ATP6V1A	523	protein_coding	ENSG00000114573.10	chr3	+	-0.76	4.97	18.1	2.96e-05	0.000324
HIBADH	11112	protein_coding	ENSG00000106049.9	chr7	-	0.802	2.71	18.1	2.98e-05	0.000325
GPR12	2835	protein_coding	ENSG00000132975.8	chr13	-	-3.71	-1.8	18.1	2.98e-05	0.000325
DSC3	1825	protein_coding	ENSG00000134762.17	chr18	-	-8.15	3.46	18.1	2.99e-05	0.000326
UGT3A1	133688	protein_coding	ENSG00000145626.11	chr5	-	2.06	-2.11	18.1	2.99e-05	0.000326
ANPEP	290	protein_coding	ENSG00000166825.14	chr15	-	-2.29	3.5	18.1	3.01e-05	0.000327
NRXN3	9369	protein_coding	ENSG00000021645.18	chr14	+	-3.31	4.88	18.1	3e-05	0.000327
COL15A1	1306	protein_coding	ENSG00000204291.11	chr9	+	-2.94	-1.96	18.1	3e-05	0.000327
KHDC1	80759	protein_coding	ENSG00000135314.12	chr6	-	1.02	0.657	18.1	3.01e-05	0.000328
CAMK4	814	protein_coding	ENSG00000152495.11	chr5	+	1.54	5.3	18.1	3.04e-05	0.000329
VARS2	57176	protein_coding	ENSG00000137411.17	chr6	+	0.55	4.51	18.1	3.04e-05	0.000329
ADAT2	134637	protein_coding	ENSG00000189007.16	chr6	-	0.637	3.71	18.1	3.03e-05	0.000329
KLHL33	123103	protein_coding	ENSG00000185271.8	chr14	-	1.84	2.65	18.1	3.04e-05	0.000329
TSPAN9	10867	protein_coding	ENSG00000011105.14	chr12	+	-2.43	2.23	18.1	3.03e-05	0.000329
SNX24	28966	protein_coding	ENSG00000064652.11	chr5	+	1.02	0.326	18.1	3.03e-05	0.000329
FATE1	89885	protein_coding	ENSG00000147378.11	chrX	+	-6.45	-1.37	18.1	3.03e-05	0.000329
EBLN1	340900	protein_coding	ENSG00000223601.2	chr10	-	-2.24	-4.28	18.1	3.07e-05	0.000332
UBE2I	7329	protein_coding	ENSG00000103275.20	chr16	+	0.566	6.2	18	3.08e-05	0.000333
RERG	85004	protein_coding	ENSG00000134533.6	chr12	-	-3.73	-3.56	18	3.08e-05	0.000333
DNAJA1	3301	protein_coding	ENSG00000086061.16	chr9	+	-0.804	7.32	18	3.11e-05	0.000336
AFF1	4299	protein_coding	ENSG00000172493.20	chr4	+	-0.845	7.59	18	3.12e-05	0.000337
AC006538.1	7064	protein_coding	ENSG00000172009.15	chr19	+	0.608	4.61	18	3.13e-05	0.000337
MOB3C	148932	protein_coding	ENSG00000142961.14	chr1	-	-0.687	3.1	18	3.13e-05	0.000337
CSAG2	102723547	protein_coding	ENSG00000268902.3	chrX	-	2.54	-3.46	18	3.13e-05	0.000337
GFRA2	2675	protein_coding	ENSG00000168546.11	chr8	-	-2.56	-2.84	18	3.13e-05	0.000337
JAK1	3716	protein_coding	ENSG00000162434.12	chr1	-	-0.593	7.63	18	3.15e-05	0.000338
BTF3L4	91408	protein_coding	ENSG00000134717.18	chr1	+	-0.531	5.23	18	3.14e-05	0.000338
ESF1	51575	protein_coding	ENSG00000089048.14	chr20	-	0.525	3.46	18	3.14e-05	0.000338
PSAP	5660	protein_coding	ENSG00000197746.14	chr10	-	-0.918	7.84	18	3.15e-05	0.000339
NAXE	128240	protein_coding	ENSG00000163382.12	chr1	+	0.809	3.58	18	3.15e-05	0.000339
AC090360.1	0	protein_coding	ENSG00000267127.7	chr18	+	1.12	-1.1	18	3.16e-05	0.00034
EXT2	2132	protein_coding	ENSG00000151348.14	chr11	+	0.494	4.62	18	3.18e-05	0.000341
EPHA2	1969	protein_coding	ENSG00000142627.13	chr1	-	-4.28	0.802	18	3.19e-05	0.000342
MRPS35	60488	protein_coding	ENSG00000061794.13	chr12	+	0.518	4.25	18	3.19e-05	0.000343
CASC4	113201	protein_coding	ENSG00000166734.20	chr15	+	0.446	5.57	18	3.21e-05	0.000343
NPW	283869	protein_coding	ENSG00000183971.8	chr16	+	1.27	-1.69	18	3.21e-05	0.000343
CXCL9	4283	protein_coding	ENSG00000138755.5	chr4	-	-5.36	-0.316	18	3.2e-05	0.000343
PLD5	200150	protein_coding	ENSG00000180287.16	chr1	-	-5.2	-1.56	18	3.2e-05	0.000343
NFE2	4778	protein_coding	ENSG00000123405.14	chr12	-	-2.09	4.08	17.9	3.23e-05	0.000345
FZD8	8325	protein_coding	ENSG00000177283.7	chr10	-	-3.32	3.06	17.9	3.22e-05	0.000345
DRAM1	55332	protein_coding	ENSG00000136048.14	chr12	+	-1.29	4.48	17.9	3.24e-05	0.000346
ZNF883	169834	protein_coding	ENSG00000285447.1	chr9	-	1.56	-4.38	17.9	3.24e-05	0.000346
ITGA4	3676	protein_coding	ENSG00000115232.14	chr2	+	-0.94	8.55	17.9	3.25e-05	0.000347
OGFOD1	55239	protein_coding	ENSG00000087263.16	chr16	+	0.544	3.67	17.9	3.26e-05	0.000347
FXYD4	53828	protein_coding	ENSG00000150201.15	chr10	+	1.58	-4.35	17.9	3.27e-05	0.000349
WNT9A	7483	protein_coding	ENSG00000143816.8	chr1	-	-3.36	2.97	17.9	3.29e-05	0.00035
RGMB	285704	protein_coding	ENSG00000174136.12	chr5	+	-2.72	1.2	17.9	3.29e-05	0.00035
IFI44	10561	protein_coding	ENSG00000137965.11	chr1	+	-1.85	4.76	17.9	3.32e-05	0.000353
EVI2A	2123	protein_coding	ENSG00000126860.11	chr17	-	-1.07	3.86	17.9	3.32e-05	0.000353
SLC18A2	6571	protein_coding	ENSG00000165646.14	chr10	+	-3.45	1.42	17.9	3.32e-05	0.000353
CLEC10A	10462	protein_coding	ENSG00000132514.13	chr17	-	-3.58	-1.46	17.9	3.33e-05	0.000353
ATP4A	495	protein_coding	ENSG00000105675.8	chr19	-	1.77	-3.93	17.9	3.32e-05	0.000353
TMEM128	85013	protein_coding	ENSG00000132406.12	chr4	-	0.594	2.29	17.9	3.34e-05	0.000354
SERTM1	400120	protein_coding	ENSG00000180440.4	chr13	+	-7.31	-0.283	17.9	3.35e-05	0.000355
CD81	975	protein_coding	ENSG00000110651.11	chr11	+	0.736	6.79	17.9	3.36e-05	0.000356
IFNA2	3440	protein_coding	ENSG00000188379.6	chr9	-	-3.59	-3.64	17.9	3.36e-05	0.000356
MARK4	57787	protein_coding	ENSG00000007047.15	chr19	+	0.581	4.43	17.9	3.37e-05	0.000357
PID1	55022	protein_coding	ENSG00000153823.18	chr2	-	-4.76	1.55	17.9	3.37e-05	0.000357
MARCH9	92979	protein_coding	ENSG00000139266.6	chr12	+	0.889	2.58	17.8	3.38e-05	0.000358
LHX2	9355	protein_coding	ENSG00000106689.11	chr9	+	-7.13	0.707	17.8	3.38e-05	0.000358
TMC6	11322	protein_coding	ENSG00000141524.15	chr17	-	-0.793	6.19	17.8	3.39e-05	0.000359
TMED6	146456	protein_coding	ENSG00000157315.5	chr16	-	-2.28	2.28	17.8	3.39e-05	0.000359
ACACA	31	protein_coding	ENSG00000278540.5	chr17	-	0.502	5.07	17.8	3.4e-05	0.000359
ZYX	7791	protein_coding	ENSG00000159840.16	chr7	+	-1.22	5.55	17.8	3.42e-05	0.00036
C17orf100	388327	protein_coding	ENSG00000256806.5	chr17	+	-1.5	-0.279	17.8	3.41e-05	0.00036
HTR3A	3359	protein_coding	ENSG00000166736.11	chr11	+	-3.53	-0.926	17.8	3.43e-05	0.000361
CCL24	6369	protein_coding	ENSG00000106178.6	chr7	-	-3.59	-3.37	17.8	3.43e-05	0.000362
MMP11	4320	protein_coding	ENSG00000099953.10	chr22	+	1.19	2.94	17.8	3.45e-05	0.000363
AFG3L2	10939	protein_coding	ENSG00000141385.9	chr18	-	0.44	5.02	17.8	3.46e-05	0.000364
ATP5MD	84833	protein_coding	ENSG00000173915.16	chr10	-	0.912	3.63	17.8	3.48e-05	0.000366
GSTM4	2948	protein_coding	ENSG00000168765.17	chr1	+	0.843	2.22	17.8	3.48e-05	0.000366
RELT	84957	protein_coding	ENSG00000054967.13	chr11	+	-0.836	5.75	17.8	3.51e-05	0.000368
GHRHR	2692	protein_coding	ENSG00000106128.19	chr7	+	-4.71	-1.39	17.8	3.51e-05	0.000368
NRGN	4900	protein_coding	ENSG00000154146.13	chr11	+	1.76	1.56	17.8	3.53e-05	0.000371
PRMT3	10196	protein_coding	ENSG00000185238.13	chr11	+	0.513	3.52	17.8	3.53e-05	0.000371
PDIA6	10130	protein_coding	ENSG00000143870.12	chr2	-	0.579	6.53	17.7	3.55e-05	0.000372
PENK	5179	protein_coding	ENSG00000181195.11	chr8	-	-7.62	0.322	17.7	3.55e-05	0.000372
GRK4	2868	protein_coding	ENSG00000125388.20	chr4	+	0.691	0.992	17.7	3.56e-05	0.000373
CFP	5199	protein_coding	ENSG00000126759.13	chrX	-	-1.48	0.879	17.7	3.56e-05	0.000373
LRRIQ4	344657	protein_coding	ENSG00000188306.6	chr3	+	1.6	-3.08	17.7	3.57e-05	0.000373
EML6	400954	protein_coding	ENSG00000214595.11	chr2	+	1.61	1.89	17.7	3.58e-05	0.000374
GPRIN3	285513	protein_coding	ENSG00000185477.5	chr4	-	-2.3	5.58	17.7	3.59e-05	0.000375
ECM2	1842	protein_coding	ENSG00000106823.12	chr9	-	-2.98	2.06	17.7	3.59e-05	0.000375
F3	2152	protein_coding	ENSG00000117525.14	chr1	-	-3.88	1.28	17.7	3.59e-05	0.000375
RSRP1	57035	protein_coding	ENSG00000117616.18	chr1	-	-0.723	7.19	17.7	3.6e-05	0.000376
STRBP	55342	protein_coding	ENSG00000165209.18	chr9	-	0.584	6.58	17.7	3.62e-05	0.000378
RNF150	57484	protein_coding	ENSG00000170153.11	chr4	-	-3.35	-1.29	17.7	3.62e-05	0.000378
RUNX3	864	protein_coding	ENSG00000020633.18	chr1	-	-1.56	4.92	17.7	3.64e-05	0.000379
ACTL8	81569	protein_coding	ENSG00000117148.8	chr1	+	2.09	-3.95	17.7	3.65e-05	0.00038
FLT4	2324	protein_coding	ENSG00000037280.16	chr5	-	-3.13	5.83	17.7	3.66e-05	0.000381
GCNT2	2651	protein_coding	ENSG00000111846.17	chr6	+	-2.03	1.54	17.7	3.67e-05	0.000382
PRR15L	79170	protein_coding	ENSG00000167183.3	chr17	-	1.7	-3.91	17.7	3.67e-05	0.000382
TRIM2	23321	protein_coding	ENSG00000109654.15	chr4	+	-1.84	2.34	17.6	3.73e-05	0.000387
PAX7	5081	protein_coding	ENSG00000009709.12	chr1	+	-3.33	-3.96	17.7	3.73e-05	0.000387
ZNF724	440519	protein_coding	ENSG00000196081.9	chr19	-	0.759	1.41	17.6	3.74e-05	0.000388
C1orf56	54964	protein_coding	ENSG00000143443.9	chr1	+	0.862	-0.509	17.6	3.74e-05	0.000388
SWT1	54823	protein_coding	ENSG00000116668.13	chr1	+	-1.41	3.72	17.6	3.76e-05	0.000389
FBXO4	26272	protein_coding	ENSG00000151876.13	chr5	+	0.766	2	17.6	3.76e-05	0.000389
PPM1L	151742	protein_coding	ENSG00000163590.14	chr3	+	1.09	3.08	17.6	3.75e-05	0.000389
TSPAN4	7106	protein_coding	ENSG00000214063.11	chr11	+	0.875	1.29	17.6	3.79e-05	0.000392
PEBP1	5037	protein_coding	ENSG00000089220.5	chr12	+	0.679	6.54	17.6	3.81e-05	0.000395
CCDC14	64770	protein_coding	ENSG00000175455.15	chr3	-	0.756	6.31	17.6	3.82e-05	0.000395
MAD2L2	10459	protein_coding	ENSG00000116670.15	chr1	-	0.877	4.46	17.6	3.82e-05	0.000395
AICDA	57379	protein_coding	ENSG00000111732.11	chr12	-	-3.59	-1.93	17.6	3.82e-05	0.000395
RHOBTB1	9886	protein_coding	ENSG00000072422.17	chr10	-	1.79	2.54	17.6	3.84e-05	0.000396
RARG	5916	protein_coding	ENSG00000172819.17	chr12	-	-1.09	2.03	17.6	3.84e-05	0.000396
C1orf127	148345	protein_coding	ENSG00000175262.14	chr1	-	-4.15	-1.37	17.6	3.88e-05	0.0004
CD69	969	protein_coding	ENSG00000110848.8	chr12	-	-1.48	8.65	17.6	3.89e-05	0.000401
HSD17B10	3028	protein_coding	ENSG00000072506.12	chrX	-	0.762	3.68	17.6	3.89e-05	0.000401
USF3	205717	protein_coding	ENSG00000176542.10	chr3	-	-0.811	6.3	17.6	3.89e-05	0.000401
OR2L8	391190	protein_coding	ENSG00000279263.1	chr1	+	-2.66	-2.66	17.6	3.89e-05	0.000401
MAPRE2	10982	protein_coding	ENSG00000166974.12	chr18	+	-0.551	5.97	17.6	3.91e-05	0.000402
LGALS7B	653499	protein_coding	ENSG00000178934.4	chr19	+	-3.77	-3.22	17.5	3.91e-05	0.000402
ENG	2022	protein_coding	ENSG00000106991.13	chr9	-	-1.15	6.04	17.5	3.95e-05	0.000406
LETM1	3954	protein_coding	ENSG00000168924.15	chr4	-	0.531	5.32	17.5	3.96e-05	0.000406
ATAD3A	55210	protein_coding	ENSG00000197785.13	chr1	+	0.667	3.48	17.5	3.96e-05	0.000406
SPAG6	9576	protein_coding	ENSG00000077327.16	chr10	+	2.29	1.26	17.5	3.97e-05	0.000408
CAMK1	8536	protein_coding	ENSG00000134072.11	chr3	-	-2.05	0.22	17.5	4e-05	0.00041
TES	26136	protein_coding	ENSG00000135269.18	chr7	+	-2.18	4.11	17.5	4.02e-05	0.000412
DHX30	22907	protein_coding	ENSG00000132153.15	chr3	+	0.397	5.95	17.5	4.04e-05	0.000414
PLS3	5358	protein_coding	ENSG00000102024.18	chrX	+	-4.69	0.0667	17.5	4.04e-05	0.000414
DAP3	7818	protein_coding	ENSG00000132676.16	chr1	+	0.427	5.44	17.5	4.05e-05	0.000415
TIMD4	91937	protein_coding	ENSG00000145850.9	chr5	-	-2.42	-1.25	17.5	4.06e-05	0.000415
MRPS23	51649	protein_coding	ENSG00000181610.13	chr17	-	0.705	3.1	17.5	4.08e-05	0.000417
IQCA1L	392843	protein_coding	ENSG00000278685.4	chr7	-	1.57	-2.04	17.5	4.08e-05	0.000417
B3GALNT2	148789	protein_coding	ENSG00000162885.13	chr1	-	0.726	3.86	17.4	4.11e-05	0.000419
CSMD1	64478	protein_coding	ENSG00000183117.19	chr8	-	2.7	4.09	17.4	4.11e-05	0.000419
EPS8L2	64787	protein_coding	ENSG00000177106.16	chr11	+	1.06	-0.139	17.5	4.1e-05	0.000419
INTU	27152	protein_coding	ENSG00000164066.13	chr4	+	-2.95	-0.722	17.5	4.1e-05	0.000419
STK40	83931	protein_coding	ENSG00000196182.10	chr1	-	-0.694	5.24	17.4	4.14e-05	0.000422
PACSIN1	29993	protein_coding	ENSG00000124507.11	chr6	+	-2.43	1.41	17.4	4.16e-05	0.000424
ADAP2	55803	protein_coding	ENSG00000184060.11	chr17	+	-1.2	1.15	17.4	4.16e-05	0.000424
CC2D2A	57545	protein_coding	ENSG00000048342.16	chr4	+	1.19	0.56	17.4	4.17e-05	0.000424
GBP5	115362	protein_coding	ENSG00000154451.14	chr1	-	-2.17	6.31	17.4	4.2e-05	0.000427
POLA1	5422	protein_coding	ENSG00000101868.10	chrX	+	0.688	4.74	17.4	4.2e-05	0.000427
CARMIL1	55604	protein_coding	ENSG00000079691.18	chr6	+	-1.99	1.16	17.4	4.21e-05	0.000427
EDNRB	1910	protein_coding	ENSG00000136160.17	chr13	-	-4.54	-0.33	17.4	4.2e-05	0.000427
SPTLC1	10558	protein_coding	ENSG00000090054.15	chr9	-	-0.389	4.93	17.4	4.25e-05	0.000431
TTF2	8458	protein_coding	ENSG00000116830.12	chr1	+	0.616	4.29	17.4	4.25e-05	0.000431
TVP23C	201158	protein_coding	ENSG00000175106.16	chr17	-	1.37	0.555	17.4	4.24e-05	0.000431
HOXA11	3207	protein_coding	ENSG00000005073.5	chr7	-	-5.08	-2.7	17.4	4.25e-05	0.000431
GLIS1	148979	protein_coding	ENSG00000174332.5	chr1	-	-3.28	-3.46	17.4	4.25e-05	0.000431
LY96	23643	protein_coding	ENSG00000154589.6	chr8	+	-1.26	0.703	17.4	4.3e-05	0.000435
ABCF2	10061	protein_coding	ENSG00000033050.9	chr7	-	0.512	2.33	17.3	4.32e-05	0.000437
CHIT1	1118	protein_coding	ENSG00000133063.16	chr1	-	-2.69	1.71	17.4	4.31e-05	0.000437
TMEM14A	28978	protein_coding	ENSG00000096092.6	chr6	+	0.912	1.32	17.3	4.34e-05	0.000438
SP110	3431	protein_coding	ENSG00000135899.17	chr2	-	-0.704	4.91	17.3	4.35e-05	0.00044
CCDC6	8030	protein_coding	ENSG00000108091.11	chr10	-	0.676	5.51	17.3	4.36e-05	0.000441
KDM1A	23028	protein_coding	ENSG00000004487.16	chr1	+	0.486	6.66	17.3	4.41e-05	0.000445
ITGA2	3673	protein_coding	ENSG00000164171.11	chr5	+	-1.92	-0.141	17.3	4.41e-05	0.000445
GABRE	2564	protein_coding	ENSG00000102287.19	chrX	-	-6.01	-0.853	17.3	4.42e-05	0.000446
IFITM3	10410	protein_coding	ENSG00000142089.16	chr11	-	-1.58	4.69	17.3	4.45e-05	0.000449
FGD6	55785	protein_coding	ENSG00000180263.14	chr12	-	-1.39	3.93	17.3	4.45e-05	0.000449
RADIL	55698	protein_coding	ENSG00000157927.16	chr7	-	-2.53	1.1	17.3	4.46e-05	0.000449
PGLYRP3	114771	protein_coding	ENSG00000159527.3	chr1	-	-5.12	-2.72	17.3	4.48e-05	0.000451
CTCF	10664	protein_coding	ENSG00000102974.16	chr16	+	0.457	6.12	17.3	4.52e-05	0.000454
DUSP6	1848	protein_coding	ENSG00000139318.8	chr12	-	-1.42	6.62	17.3	4.53e-05	0.000455
RNF187	149603	protein_coding	ENSG00000168159.12	chr1	+	0.634	4.63	17.2	4.54e-05	0.000456
LY6H	4062	protein_coding	ENSG00000176956.12	chr8	-	-5.12	0.379	17.2	4.54e-05	0.000456
TGM6	343641	protein_coding	ENSG00000166948.9	chr20	+	1.8	-4.07	17.2	4.55e-05	0.000457
NF2	4771	protein_coding	ENSG00000186575.17	chr22	+	0.393	4.66	17.2	4.59e-05	0.000459
MMP17	4326	protein_coding	ENSG00000198598.6	chr12	+	-2.24	3.86	17.2	4.58e-05	0.000459
CLEC2A	387836	protein_coding	ENSG00000188393.8	chr12	-	-4.9	-2.89	17.2	4.58e-05	0.000459
IGSF21	84966	protein_coding	ENSG00000117154.12	chr1	+	-3.81	-3.47	17.2	4.57e-05	0.000459
SCML2	10389	protein_coding	ENSG00000102098.19	chrX	-	-1.39	4.81	17.2	4.6e-05	0.00046
ALDH1A1	216	protein_coding	ENSG00000165092.13	chr9	-	-2.74	3.07	17.2	4.6e-05	0.00046
SNED1	25992	protein_coding	ENSG00000162804.14	chr2	+	1.55	2.82	17.2	4.59e-05	0.00046
DHRS9	10170	protein_coding	ENSG00000073737.16	chr2	+	-3.65	-0.178	17.2	4.61e-05	0.000461
NDUFAF8	284184	protein_coding	ENSG00000224877.4	chr17	+	0.732	2.3	17.2	4.62e-05	0.000462
NOLC1	9221	protein_coding	ENSG00000166197.16	chr10	+	0.56	6.01	17.2	4.63e-05	0.000463
RFTN1	23180	protein_coding	ENSG00000131378.14	chr3	-	-0.912	6.12	17.2	4.66e-05	0.000465
C6orf62	81688	protein_coding	ENSG00000112308.13	chr6	-	-0.531	6.52	17.2	4.68e-05	0.000467
LRRC3B	116135	protein_coding	ENSG00000179796.12	chr3	+	1.9	2.3	17.2	4.69e-05	0.000467
RNF217	154214	protein_coding	ENSG00000146373.16	chr6	+	-2.76	2.27	17.2	4.68e-05	0.000467
CFAP74	85452	protein_coding	ENSG00000142609.18	chr1	-	-5.76	1.21	17.2	4.68e-05	0.000467
MFGE8	4240	protein_coding	ENSG00000140545.15	chr15	-	0.947	3.28	17.2	4.72e-05	0.000469
KHDC1L	100129128	protein_coding	ENSG00000256980.5	chr6	-	1.63	-3.56	17.2	4.71e-05	0.000469
PRRG1	5638	protein_coding	ENSG00000130962.17	chrX	+	-4.92	-1.67	17.2	4.72e-05	0.000469
KLHDC3	116138	protein_coding	ENSG00000124702.18	chr6	+	0.565	5.03	17.2	4.73e-05	0.00047
B4GALT2	8704	protein_coding	ENSG00000117411.16	chr1	+	0.88	2.31	17.2	4.73e-05	0.00047
HLA-G	3135	protein_coding	ENSG00000204632.11	chr6	+	-1.22	0.883	17.2	4.75e-05	0.000472
MEGF9	1955	protein_coding	ENSG00000106780.9	chr9	-	-0.909	4.81	17.1	4.77e-05	0.000474
RIMBP2	23504	protein_coding	ENSG00000060709.15	chr12	-	-5.93	1.4	17.1	4.82e-05	0.000479
ZNF215	7762	protein_coding	ENSG00000149054.16	chr11	+	-3.02	-1.88	17.1	4.89e-05	0.000484
RIMS2	9699	protein_coding	ENSG00000176406.23	chr8	+	2.32	-1.68	17.1	4.88e-05	0.000484
CHD3	1107	protein_coding	ENSG00000170004.16	chr17	+	-0.54	7.71	17.1	4.9e-05	0.000485
[truncated: 17,798 more rows]
